# Supplementary material
Source: Elsevier journal article supplement (https://cris.unibo.it/retrieve/e1dcb336-6eda-7715-e053-1705fe0a6cc9/mmc2.pdf)
Supplement: mmc2 [file mmc2.pdf]

# THE LANCET

## Supplementary appendix 2

This appendix formed part of the original submission and has been peer reviewed. We post it as supplied by the authors.

Supplement to: GBD 2017 SDG Collaborators. Measuring progress from 1990 to 2017 and projecting attainment to 2030 of the health-related Sustainable Development Goals for 195 countries and territories: a systematic analysis for the Global Burden of Disease Study 2017. *Lancet* 2018; **392**: 2091–138.

## Supplementary results to Measuring progress and projecting attainment on the basis of past trends of the health-related Sustainable Development Goals in 195 countries and territories: an analysis from the Global Burden of Disease Study 2017

The supplementary results appendix offers additional figures and tables.

## List of Supplementary Results: Figures and Tables

Supplemental figures and tables providing more detailed results can be found in the supplementary results appendix.

**Supplementary figure 1. Census or population registry status and coverage of a population and housing census within the last 10 years, by location, from 1990-2017.** Per SDG indicator 17.19.2a, the target is that each country is to have conducted a population and housing census in the last 10 years, or have a population registry from which detailed population and housing statistics are derived. Census years are designated by a dark blue colouring, followed by a lighter blue colour indicating census coverage for the 9 years following a census for a total of 10 years of census coverage. A medium blue colour is used to designate the implementation of a population registry. White indicates that a given location-year is not covered by a population and housing census or population registry. Census status for 1990-2000 was informed by census conducted from 1980-1989, which are not shown here. SDG=Sustainable Development Goal.

**Supplementary figure 2. Map of health-related SDG index, by decile, in 1990, 2000, and 2017 for Japan (A), Sweden (B), England (C), USA (D), Mexico (E), Brazil (F), India (G), and Kenya (H).** Deciles were based on the distribution of health-related SDG index values for countries and territories in 2017, as found in figure 2 of the main text, and then were applied for subnational locations over time. SDG=Sustainable Development Goal.

**Supplementary figure 3. Projected performance, based on past trends, on the health-related SDG index and 40 individual health-related indicators, by country or territory, 2030.** All projections were based on past trends and rates of change observed from 1990 to 2017. Countries are ranked by their health-related SDG index from highest to lowest in 2030, which was projected based on past trends. Indices and individual indicators are reported on a scale of 0 to 100, with 0 representing the worst levels from 1990 to 2030 and 100 reflecting the best during that time. SDG indicator 17.19.2a, population census status within the last 10 years, was not included in the health-related SDG index as projections were not generated for this indicator. Definitions of health-related SDG indicators are shown in table 1 in the main manuscript. SDG=Sustainable Development Goal. Mort=mortality. Mat Mort Ratio=maternal mortality ratio; Skill Birth Attend=skilled birth attendance. Incid=incidence. Preval=prevalence. TB=tuberculosis. Hep B=hepatitis B. NTD=neglected tropical diseases. NCD=non-communicable disease. Inj=injury. FP Need Met, Mod=family planning need met with modern contraception methods. Adol=adolescent. UHC Serv Cov Index=universal health coverage, service coverage index. Air Poll=air pollution. WaSH=water, sanitation, and hygiene. Cov=coverage. Int=intimate. Viol=violence. HH=household. Occ=occupational risk. PM2.5= particulate matter smaller than 2.5 microns in diameter. Cert Death Reg=well-certified death registration.

**Supplementary figure 4. Comparing attainment of defined health-related SDG indicator targets in 2017 and, based on past trends, projected to be attained in 2030, by country.** Countries and territories are ranked by the number of SDG indicator targets they were projected to attain based on the mean estimate for 2030. All projections were based on past trends and rates of change observed from 1990-2017. Of the 41 health-related indicators measured in this study, 25 had defined targets linked to each indicator. SDG target 3.6 aims to reduce road injury mortality by 50% between 2015 and 2020, and thus attainment for

this indicator is based on estimates from 2015 to 2020 rather than 2015 to 2030. Definitions of health-related SDG indicators and targets associated with them, as well as the specific target thresholds applied, are shown in table 1 in the main manuscript. SDG=Sustainable Development Goal. Mort=mortality. Mat Mort Ratio=maternal mortality ratio; Skill Birth Attend=skilled birth attendance. Incid=incidence. Prev=prevalence. TB=tuberculosis. NTD=neglected tropical diseases. NCD=non-communicable disease. Inj=injury. FP Need Met, Mod=family planning need met with modern contraception methods. UHC Serv Cov Index=universal health coverage, service coverage index. Air Poll=air pollution. WaSH=water, sanitation, and hygiene. Cov=coverage. Int=intimate. Viol=violence. HH=household. Cert Death Reg=well-certified death registration.

**Supplementary figure 5. Global annualised rate of change required to meet selected SDG targets based on annualised rate of change achieved by countries from 1990–2015 for selected SDG indicators with defined targets: well-certified death registration, child overweight, child sex abuse, child stunting, child wasting, hygiene, intimate partner violence, malaria incidence, neonatal mortality, non-intimate partner sexual violence, NTD prevalence, road injury mortality, sanitation, skilled birth attendance, suicide mortality, and water.** For the 25 SDG indicators with defined targets, the global ARC required to meet each target was computed using the global average in 2015 and specific thresholds to be met by 2030 or relative reductions to be achieved by 2030. SDG target 3.6 aims to reduce road injury mortality by 50% between 2015 and 2020, and thus the global ARC is based on the time span from 2015 to 2020 rather than 2015 to 2030. Global ARCs are compared with the ARCs achieved across countries and territories from 1990-2015. The best-performing decile of ARC is shown compared to all other deciles against the global ARC required to meet the defined SDG target. A subset of SDG indicators with defined targets are shown in figure 6 in the main manuscript; the remaining plots are shown here. Definitions of health-related SDG indicators and targets associated with them are shown in table 1 in the main manuscript. ARC=annualised rate of change. SDG=Sustainable Development Goal.

**Supplementary figure 6. Comparing 2016 values on the health-related SDG index from GBD 2016 to 2017 values on the health-related SDG index from GBD 2017.** Countries are colour-coded by SDI quintile, and are abbreviated according to their ISO3 codes, which are listed in the appendix. The 7 territories included for GBD 2017 are not shown since they were not included in previous GBD SDG analyses. SDG=Sustainable Development Goal. GBD=Global Burden of Disease.

**Supplementary figure 7. Comparing 2030 values on the health-related SDG index from GBD 2016 to 2030 values on the health-related SDG index from GBD 2017.** Countries are colour-coded by SDI quintile, and are abbreviated according to their ISO3 codes, which are listed in the appendix. The 7 territories included for GBD 2017 are not shown since they were not included in previous GBD SDG analyses. SDG=Sustainable Development Goal. GBD=Global Burden of Disease.

**Supplementary figure 8. Comparing 2016 rankings on the health-related SDG index from GBD 2016 to 2017 rankings on the health-related SDG index from GBD 2017.** Countries are colour-coded by SDI quintile, and are abbreviated according to their ISO3 codes, which are listed in the appendix. The 7 territories included for GBD 2017 are not shown since they were not included in previous GBD SDG analyses. SDG=Sustainable Development Goal. GBD=Global Burden of Disease.

**Supplementary table 1. Health-related SDGs excluded in the present analysis, and measurement needs and strategy for future reporting, by SDG target.** Definitions and descriptions of health-related SDG indicators beyond the specific indicators originate from the IAEG-SDGs compilation of metadata for each SDG (as



provided by each indicator's custodial agency). DAH=development assistance for health. DHS=Demographic and Health Survey. GBD=Global Burden of Disease. IAEG-SDGs=Inter-agency and Expert Group on SDG Indicators. IHR=International Health Regulations. ISIC=International Standard Industrial Classification. JEE=Joint External Evaluation. NCD=non-communicable diseases. SDG=Sustainable Development Goal. TRIPS=Agreement on Trade-Related Aspects of Intellectual Property Rights. UHC=universal health coverage. UN=United Nations. WHO=World Health Organization.

**Supplementary table 2. Health-related SDG index in 2000, 2015, 2017, and 2030, by country or territory.**

The health-related SDG index is reported on a scale of 0 to 100, with 0 representing the worst levels from 1990 to 2030 and 100 reflecting the best during that time. SDG=Sustainable Development Goal.

**Supplementary table 3. Unscaled values for the 40 individual health-related SDG indicators in 2000, 2015, 2017, and 2030, and projected percent change from 2015 to 2030, by country or territory.**

Projected estimates for 2030 were produced based on past trends and rates of change observed from 1990 to 2017. Estimates are reported for each country and territory included in this analysis, and ordered by health-related SDG indicator followed by GBD super-region and region. SDG indicator 17.19.2a, population census status within the last 10 years, is not included here as projections were not generated for this indicator. All results from 1990 to 2017 for SDG indicator 17.19.2a can be found in supplementary figure 1. For this table, draws for conflict and disaster mortality were truncated so that any values which fell outside the confidence intervals for any location year were set to the lower or upper bound of that confidence interval. SDG=Sustainable Development Goal. GBD=Global Burden of Disease.

**Supplementary table 4. GATHER checklist of information that should be included in reports of global health estimates, with description of compliance and location of information for GBD 2017 SDG Capstone.**

**Supplementary figure 1 . Census or population registry status and coverage of a population and housing census within the last 10 years, by location, from 1990-2017.** Per SDG indicator 17.19.2a, the target is that each country is to have conducted a population and housing census in the last 10 years, or have a population registry from which detailed population and housing statistics are derived. Census years are designated by a dark blue colouring, followed by a lighter blue colour indicating census coverage for the 9 years following a census for a total of 10 years of census coverage. A medium blue colour is used to designate the implementation of a population registry. White indicates that a given location-year is not covered by a population and housing census or population registry. Census status for 1990-2000 was informed by censuses conducted from 1980-1989, which are not shown here. SDG=Sustainable Development Goal.

| Location name                    | 1990   | 1991   | 1992   | 1993   | 1994 | 1995 | 1996   | 1997 | 1998   | 1999   | 2000   | 2001   | 2002   | 2003   | 2004   | 2005   | 2006   | 2007 | 2008   | 2009   | 2010   | 2011   | 2012   | 2013   | 2014 | 2015   | 2016   | 2017   |
|----------------------------------|--------|--------|--------|--------|------|------|--------|------|--------|--------|--------|--------|--------|--------|--------|--------|--------|------|--------|--------|--------|--------|--------|--------|------|--------|--------|--------|
| Afghanistan                      |        |        |        |        |      |      |        |      |        |        |        |        |        |        |        |        |        |      |        |        |        |        |        |        |      |        |        |        |
| Albania                          |        |        |        |        |      |      |        |      |        |        |        | Census |        |        |        |        |        |      |        |        |        |        | Census |        |      |        |        |        |
| Algeria                          |        |        |        |        |      |      |        |      | Census |        |        |        |        |        |        |        |        |      |        | Census |        |        |        |        |      |        |        |        |
| American Samoa                   | Census |        |        |        |      |      |        |      |        |        | Census |        |        |        |        |        |        |      |        |        |        | Census |        |        |      |        |        |        |
| Andorra                          |        |        |        |        |      |      |        |      |        |        |        |        |        |        |        |        |        |      |        |        |        |        |        |        |      |        |        |        |
| Angola                           |        |        |        |        |      |      |        |      |        |        |        |        |        |        |        |        |        |      |        |        |        |        |        |        |      |        | Census |        |
| Antigua and Barbuda              |        | Census |        |        |      |      |        |      |        |        |        | Census |        |        |        |        |        |      |        |        |        |        | Census |        |      |        |        |        |
| Argentina                        |        | Census |        |        |      |      |        |      |        |        |        | Census |        |        |        |        |        |      |        |        |        | Census |        |        |      |        |        |        |
| Armenia                          |        |        |        |        |      |      |        |      |        |        |        | Census |        |        |        |        |        |      |        |        |        |        | Census |        |      |        |        |        |
| Australia                        |        | Census |        |        |      |      | Census |      |        |        |        | Census |        |        |        |        | Census |      |        |        |        | Census |        |        |      |        | Census |        |
| Austria                          |        | Census |        |        |      |      |        |      |        |        |        | Census |        |        |        |        |        |      |        |        |        |        |        |        |      |        |        |        |
| Azerbaijan                       |        |        |        |        |      |      |        |      |        | Census |        |        |        |        |        |        |        |      |        |        | Census |        |        |        |      |        |        |        |
| Bahrain                          |        | Census |        |        |      |      |        |      |        |        |        | Census |        |        |        |        |        |      |        |        |        | Census |        |        |      |        |        |        |
| Bangladesh                       |        | Census |        |        |      |      |        |      |        |        |        | Census |        |        |        |        |        |      |        |        |        |        | Census |        |      |        |        |        |
| Barbados                         | Census |        |        |        |      |      |        |      |        |        | Census |        |        |        |        |        |        |      |        |        |        | Census |        |        |      |        |        |        |
| Belarus                          |        |        |        |        |      |      |        |      |        | Census |        |        |        |        |        |        |        |      |        |        | Census |        |        |        |      |        |        |        |
| Belgium                          |        | Census |        |        |      |      |        |      |        |        |        | Census |        |        |        |        |        |      |        |        |        |        |        |        |      |        |        |        |
| Belize                           |        | Census |        |        |      |      |        |      |        |        | Census |        |        |        |        |        |        |      |        |        |        | Census |        |        |      |        |        |        |
| Benin                            |        |        | Census |        |      |      |        |      |        |        |        |        | Census |        |        |        |        |      |        |        |        |        |        | Census |      |        |        |        |
| Bermuda                          |        | Census |        |        |      |      |        |      |        |        | Census |        |        |        |        |        |        |      |        |        |        | Census |        |        |      |        |        |        |
| Bhutan                           |        |        |        |        |      |      |        |      |        |        |        |        |        |        | Census |        |        |      |        |        |        |        |        |        |      |        |        | Census |
| Bolivia                          |        |        | Census |        |      |      |        |      |        |        |        | Census |        |        |        |        |        |      |        |        |        |        | Census |        |      |        |        |        |
| Bosnia and Herzegovina           |        | Census |        |        |      |      |        |      |        |        |        |        |        |        |        |        |        |      |        |        |        |        |        | Census |      |        |        |        |
| Botswana                         |        | Census |        |        |      |      |        |      |        |        |        | Census |        |        |        |        |        |      |        |        |        |        | Census |        |      |        |        |        |
| Brazil                           |        | Census |        |        |      |      |        |      |        |        | Census |        |        |        |        |        |        |      |        |        |        | Census |        |        |      |        |        |        |
| Brunei                           |        | Census |        |        |      |      |        |      |        |        |        | Census |        |        |        |        |        |      |        |        |        |        | Census |        |      |        |        |        |
| Bulgaria                         |        |        | Census |        |      |      |        |      |        |        |        |        |        |        |        |        |        |      |        |        |        |        |        |        |      |        |        |        |
| Burkina Faso                     |        |        |        |        |      |      | Census |      |        |        |        |        |        |        |        |        | Census |      |        |        |        |        |        |        |      |        | Census |        |
| Burundi                          | Census |        |        |        |      |      |        |      |        |        |        |        |        |        |        |        |        |      |        |        | Census |        |        |        |      |        |        |        |
| Cambodia                         |        |        |        |        |      |      |        |      | Census |        |        |        |        |        |        |        |        |      |        | Census |        |        |        |        |      |        |        |        |
| Cameroon                         |        |        |        |        |      |      |        |      |        |        |        |        |        |        |        | Census |        |      |        |        |        |        |        |        |      |        |        |        |
| Canada                           |        | Census |        |        |      |      | Census |      |        |        |        | Census |        |        |        |        | Census |      |        |        |        | Census |        |        |      |        | Census |        |
| Cape Verde                       | Census |        |        |        |      |      |        |      |        |        | Census |        |        |        |        |        |        |      |        |        |        | Census |        |        |      |        |        |        |
| Central African Republic         |        |        |        |        |      |      |        |      |        |        |        |        |        | Census |        |        |        |      |        |        |        |        |        |        |      |        |        |        |
| Chad                             |        |        | Census |        |      |      |        |      |        |        |        |        |        |        |        |        |        |      |        |        | Census |        |        |        |      |        |        |        |
| Chile                            |        |        | Census |        |      |      |        |      |        |        |        |        | Census |        |        |        |        |      |        |        |        |        | Census |        |      |        |        | Census |
| China                            | Census | Census |        |        |      |      | Census |      |        |        | Census | Census |        |        |        |        | Census |      |        |        | Census | Census |        |        |      |        | Census |        |
| Colombia                         |        |        |        | Census |      |      |        |      |        |        |        |        |        |        |        | Census |        |      |        |        |        |        |        |        |      |        |        |        |
| Comoros                          |        | Census |        |        |      |      |        |      |        |        |        |        |        | Census |        |        |        |      |        |        |        |        |        |        |      |        | Census |        |
| Congo                            |        |        |        |        |      |      | Census |      |        |        |        |        |        |        |        |        |        |      | Census |        |        |        |        |        |      |        |        | Census |
| Costa Rica                       |        |        |        |        |      |      |        |      |        |        | Census |        |        |        |        |        |        |      |        |        |        | Census |        |        |      |        |        |        |
| Cote d'Ivoire                    |        |        |        |        |      |      |        |      | Census |        |        |        |        |        |        |        |        |      |        |        |        |        |        |        |      | Census |        |        |
| Croatia                          |        | Census |        |        |      |      |        |      |        |        |        | Census |        |        |        |        |        |      |        |        |        |        | Census |        |      |        |        |        |
| Cuba                             |        |        |        |        |      |      |        |      |        |        |        |        | Census |        |        |        |        |      |        |        |        |        | Census |        |      |        |        |        |
| Cyprus                           |        |        | Census |        |      |      | Census |      |        |        |        | Census |        |        |        |        | Census |      |        |        |        | Census |        |        |      |        |        |        |
| Czech Republic                   |        | Census |        |        |      |      |        |      |        |        |        |        |        |        |        |        |        |      |        |        |        |        |        |        |      |        |        |        |
| Democratic Republic of the Congo |        |        |        |        |      |      |        |      |        |        |        |        |        |        |        |        |        |      |        |        |        |        |        |        |      |        |        |        |
| Denmark                          |        |        |        |        |      |      |        |      |        |        |        |        |        |        |        |        |        |      |        |        |        |        |        |        |      |        |        |        |
| Djibouti                         |        |        |        |        |      |      |        |      |        |        |        |        |        |        |        |        |        |      |        |        | Census |        |        |        |      |        |        |        |
| Dominica                         |        | Census |        |        |      |      |        |      |        |        |        | Census |        |        |        |        |        |      |        |        |        | Census |        |        |      |        |        |        |

**Supplementary figure 1 . Census or population registry status and coverage of a population and housing census within the last 10 years, by location, from 1990-2017.** Per SDG indicator 17.19.2a, the target is that each country is to have conducted a population and housing census in the last 10 years, or have a population registry from which detailed population and housing statistics are derived. Census years are designated by a dark blue colouring, followed by a lighter blue colour indicating census coverage for the 9 years following a census for a total of 10 years of census coverage. A medium blue colour is used to designate the implementation of a population registry. White indicates that a given location-year is not covered by a population and housing census or population registry. Census status for 1990-2000 was informed by censuses conducted from 1980-1989, which are not shown here. SDG–Sustainable Development Goal.

| Location name                  | 1990   | 1991   | 1992   | 1993   | 1994   | 1995   | 1996   | 1997   | 1998 | 1999   | 2000   | 2001   | 2002   | 2003   | 2004   | 2005   | 2006   | 2007   | 2008   | 2009   | 2010   | 2011   | 2012   | 2013   | 2014   | 2015   | 2016   | 2017   |
|--------------------------------|--------|--------|--------|--------|--------|--------|--------|--------|------|--------|--------|--------|--------|--------|--------|--------|--------|--------|--------|--------|--------|--------|--------|--------|--------|--------|--------|--------|
| Dominican Republic             |        |        |        | Census |        |        |        |        |      |        |        |        | Census |        |        |        |        |        |        |        | Census |        |        |        |        |        |        |        |
| Ecuador                        | Census |        |        |        |        |        |        |        |      |        |        | Census |        |        |        |        |        |        |        |        |        | Census |        |        |        |        |        |        |
| Egypt                          |        |        |        |        |        |        | Census |        |      |        |        |        |        |        |        |        |        | Census |        |        |        |        |        |        |        |        |        | Census |
| El Salvador                    |        |        | Census |        |        |        |        |        |      |        |        |        |        |        |        |        |        | Census |        |        |        |        |        |        |        |        |        |        |
| Equatorial Guinea              |        |        |        | Census |        |        |        |        |      |        |        | Census |        |        |        |        |        |        |        |        |        |        |        |        |        | Census |        |        |
| Eritrea                        |        |        |        |        |        |        |        |        |      |        |        |        |        |        |        |        |        |        |        |        |        |        |        |        |        |        |        |        |
| Estonia                        |        |        |        |        |        |        |        |        |      |        |        |        |        |        |        |        |        |        |        |        |        |        |        |        |        |        |        |        |
| Ethiopia                       |        |        |        | Census |        |        |        |        |      |        |        |        |        |        |        |        |        | Census |        |        |        |        |        |        |        |        |        |        |
| Federated States of Micronesia |        |        |        | Census |        |        |        |        |      |        | Census |        |        |        |        |        |        |        |        |        |        | Census |        |        |        |        |        |        |
| Fiji                           |        |        |        |        |        |        | Census |        |      |        |        |        |        |        |        |        |        | Census |        |        |        |        |        |        |        |        |        | Census |
| Finland                        |        |        |        |        |        |        |        |        |      |        |        |        |        |        |        |        |        |        |        |        |        |        |        |        |        |        |        |        |
| France                         | Census |        |        |        |        |        |        |        |      | Census |        |        |        |        |        |        |        | Census | Census | Census | Census | Census | Census | Census | Census | Census | Census | Census |
| Gabon                          |        |        |        | Census |        |        |        |        |      |        |        |        |        | Census |        |        |        |        |        |        |        |        |        |        | Census |        |        |        |
| Georgia                        |        |        |        |        |        |        |        |        |      |        |        |        | Census |        |        |        |        |        |        |        |        |        |        |        |        | Census |        |        |
| Germany                        |        |        |        |        |        |        |        |        |      |        |        |        |        |        |        |        |        |        |        |        |        |        |        |        |        |        |        |        |
| Ghana                          |        |        |        |        |        |        |        |        |      |        | Census |        |        |        |        |        |        |        |        |        |        | Census |        |        |        |        |        |        |
| Greece                         |        | Census |        |        |        |        |        |        |      |        |        |        | Census |        |        |        |        |        |        |        |        |        |        |        |        |        |        |        |
| Greenland                      |        |        |        |        |        |        |        |        |      |        |        |        |        |        |        |        |        |        |        |        |        |        |        |        |        |        |        |        |
| Grenada                        |        | Census |        |        |        |        |        |        |      |        |        |        | Census |        |        |        |        |        |        |        |        |        | Census |        |        |        |        |        |
| Guam                           | Census |        |        |        |        |        |        |        |      |        | Census |        |        |        |        |        |        |        |        |        |        | Census |        |        |        |        |        |        |
| Guatemala                      |        |        |        | Census |        |        |        |        |      |        |        |        | Census |        |        |        |        |        |        |        |        |        |        |        |        |        |        |        |
| Guinea                         |        |        |        |        |        |        | Census |        |      |        |        |        |        |        |        |        |        |        |        |        |        |        |        |        |        | Census |        |        |
| Guinea-Bissau                  |        | Census |        |        |        |        |        |        |      |        |        |        |        |        |        |        |        |        |        |        | Census |        |        |        |        |        |        |        |
| Guyana                         |        | Census |        |        |        |        |        |        |      |        |        |        | Census |        |        |        |        |        |        |        |        |        |        | Census |        |        |        |        |
| Haiti                          |        |        |        |        |        |        |        |        |      |        |        |        |        | Census |        |        |        |        |        |        |        |        |        |        |        |        |        |        |
| Honduras                       |        |        |        |        |        |        |        |        |      |        |        | Census |        |        |        |        |        |        |        |        |        |        |        | Census |        |        |        |        |
| Hungary                        | Census |        |        |        |        |        |        |        |      |        |        | Census |        |        |        |        |        |        |        |        |        | Census | Census | Census | Census | Census | Census | Census |
| Iceland                        |        |        |        |        |        |        |        |        |      |        |        |        |        |        |        |        |        |        |        |        |        |        |        |        |        |        |        |        |
| India                          |        | Census |        |        |        |        |        |        |      |        |        | Census |        |        |        |        |        |        |        |        |        |        |        |        |        |        |        | Census |
| Indonesia                      | Census |        |        |        |        |        |        |        |      |        | Census |        |        |        |        |        |        |        |        |        |        |        |        |        |        |        |        |        |
| Iran                           |        |        |        |        |        |        | Census |        |      |        |        |        |        |        |        |        |        | Census |        |        |        | Census |        |        |        |        |        | Census |
| Iraq                           |        |        |        |        |        |        |        | Census |      |        |        |        |        |        |        |        |        |        |        |        |        |        |        |        |        |        |        |        |
| Ireland                        |        | Census |        |        |        |        | Census |        |      |        |        |        | Census |        |        |        |        | Census |        |        |        | Census |        |        |        |        |        | Census |
| Israel                         |        |        |        |        | Census |        |        |        |      |        |        |        |        |        |        |        |        |        | Census |        |        |        |        |        |        |        |        |        |
| Italy                          |        | Census |        |        |        |        |        |        |      |        |        | Census |        |        |        |        |        |        |        |        |        |        |        |        |        |        |        |        |
| Jamaica                        |        | Census |        |        |        |        |        |        |      |        |        | Census |        |        |        |        |        |        |        |        |        |        | Census |        |        |        |        |        |
| Japan                          | Census |        |        |        |        | Census |        |        |      |        | Census |        |        |        |        |        | Census |        |        |        |        | Census |        |        |        |        |        | Census |
| Jordan                         |        |        |        | Census |        |        |        |        |      |        |        |        |        |        | Census |        |        |        |        |        |        |        |        |        |        |        | Census |        |
| Kazakhstan                     |        |        |        |        |        |        |        |        |      | Census |        |        |        |        |        |        |        |        |        |        |        | Census |        |        |        |        |        |        |
| Kenya                          |        |        |        |        |        |        |        |        |      | Census |        |        |        |        |        |        |        |        |        |        |        | Census |        |        |        |        |        |        |
| Kiribati                       | Census |        |        |        |        | Census |        |        |      |        | Census |        |        |        |        |        | Census |        |        |        |        | Census |        |        |        |        |        | Census |
| Kuwait                         |        |        |        |        | Census |        |        |        |      |        |        |        |        |        | Census |        |        |        |        |        |        |        | Census |        |        |        |        |        |
| Kyrgyzstan                     |        |        |        |        |        |        |        |        |      | Census |        |        |        |        |        |        |        |        |        |        |        | Census |        |        |        |        |        |        |
| Laos                           |        |        |        |        | Census |        |        |        |      |        |        |        |        |        |        | Census |        |        |        |        |        |        |        |        |        |        | Census |        |
| Latvia                         |        |        |        |        |        |        |        |        |      |        | Census |        |        |        |        |        |        |        |        |        |        |        |        |        |        |        |        |        |
| Lebanon                        |        |        |        |        |        |        |        |        |      |        |        |        |        |        |        |        |        |        |        |        |        |        |        |        |        |        |        |        |
| Lesotho                        |        |        |        |        |        |        | Census |        |      |        |        |        |        |        |        |        |        | Census |        |        |        |        |        |        |        |        | Census |        |
| Liberia                        |        |        |        |        |        |        |        |        |      |        |        |        |        |        |        |        |        |        |        |        | Census |        |        |        |        |        |        |        |
| Libya                          |        |        |        |        | Census |        |        |        |      |        |        |        |        |        |        |        | Census |        |        |        |        |        |        |        |        |        |        |        |
| Lithuania                      |        |        |        |        |        |        |        |        |      |        |        | Census |        |        |        |        |        |        |        |        |        | Census |        |        |        |        |        |        |

**Supplementary figure 1 . Census or population registry status and coverage of a population and housing census within the last 10 years, by location, from 1990-2017.** Per SDG indicator 17.19.2a, the target is that each country is to have conducted a population and housing census in the last 10 years, or have a population registry from which detailed population and housing statistics are derived. Census years are designated by a dark blue colouring, followed by a lighter blue colour indicating census coverage for the 9 years following a census for a total of 10 years of census coverage. A medium blue colour is used to designate the implementation of a population registry. White indicates that a given location-year is not covered by a population and housing census or population registry. Census status for 1990-2000 was informed by censuses conducted from 1980-1989, which are not shown here. SDG=Sustainable Development Goal.

| Location name                    | 1990   | 1991   | 1992   | 1993   | 1994   | 1995   | 1996   | 1997 | 1998   | 1999   | 2000   | 2001   | 2002   | 2003   | 2004   | 2005   | 2006 | 2007   | 2008   | 2009   | 2010   | 2011   | 2012   | 2013   | 2014   | 2015   | 2016   | 2017   |
|----------------------------------|--------|--------|--------|--------|--------|--------|--------|------|--------|--------|--------|--------|--------|--------|--------|--------|------|--------|--------|--------|--------|--------|--------|--------|--------|--------|--------|--------|
| Luxembourg                       |        | Census |        |        |        |        |        |      |        |        |        |        |        |        |        |        |      |        |        |        |        |        |        |        |        |        |        |        |
| Macedonia                        |        |        |        |        | Census |        |        |      |        |        |        |        | Census |        |        |        |      |        |        |        |        |        |        |        |        |        |        |        |
| Madagascar                       |        |        |        | Census |        |        |        |      |        |        |        |        |        |        |        |        |      |        |        |        |        |        |        |        |        |        |        |        |
| Malawi                           |        |        |        |        |        |        |        |      | Census |        |        |        |        |        |        |        |      |        |        | Census |        |        |        |        |        |        |        |        |
| Malaysia                         | Census | Census |        |        |        |        |        |      |        |        | Census |        |        |        |        |        |      |        |        |        | Census |        |        |        |        |        |        |        |
| Maldives                         | Census |        |        |        |        | Census |        |      |        |        | Census |        |        |        |        |        |      | Census |        |        |        |        |        |        |        | Census |        |        |
| Mali                             |        |        |        |        |        |        |        |      | Census |        |        |        |        |        |        |        |      |        |        |        | Census |        |        |        |        |        |        |        |
| Malta                            |        |        |        |        | Census |        |        |      |        |        |        |        |        |        | Census |        |      |        |        |        |        |        | Census |        |        |        |        |        |
| Marshall Islands                 |        |        |        |        |        |        |        |      |        | Census |        |        |        |        |        |        |      |        |        |        |        |        | Census |        |        |        |        |        |
| Mauritania                       |        |        |        |        |        |        |        |      |        |        | Census |        |        |        |        |        |      |        |        |        |        |        |        |        | Census |        |        |        |
| Mauritius                        | Census |        |        |        |        |        |        |      |        |        | Census |        |        |        |        |        |      |        |        |        |        | Census |        |        |        |        |        |        |
| Mexico                           | Census |        |        |        |        | Census |        |      |        |        | Census |        |        |        |        | Census |      |        |        |        |        | Census |        |        |        |        |        |        |
| Moldova                          |        |        |        |        |        |        |        |      |        |        |        |        |        |        | Census |        |      |        |        |        |        |        |        |        |        | Census | Census |        |
| Mongolia                         |        |        |        |        |        |        |        |      |        |        | Census |        |        |        |        |        |      |        |        |        |        | Census |        |        |        |        |        |        |
| Montenegro                       |        | Census |        |        |        |        |        |      |        |        |        |        |        | Census |        |        |      |        |        |        |        |        | Census |        |        |        |        |        |
| Morocco                          |        |        |        |        | Census |        |        |      |        |        |        |        |        |        | Census |        |      |        |        |        |        |        |        |        |        | Census |        |        |
| Mozambique                       |        |        |        |        |        |        |        |      | Census |        |        |        |        |        |        |        |      |        | Census |        |        |        |        |        |        |        |        | Census |
| Myanmar                          |        |        |        |        |        |        |        |      |        |        |        |        |        |        |        |        |      |        |        |        |        |        |        |        |        | Census |        |        |
| Namibia                          |        | Census |        |        |        |        |        |      |        |        |        | Census |        |        |        |        |      |        |        |        |        |        | Census |        |        |        |        |        |
| Nepal                            |        | Census |        |        |        |        |        |      |        |        |        | Census |        |        |        |        |      |        |        |        |        |        | Census |        |        |        |        |        |
| Netherlands                      |        |        |        |        |        |        |        |      |        |        |        |        |        |        |        |        |      |        |        |        |        |        |        |        |        |        |        |        |
| New Zealand                      |        | Census |        |        |        |        | Census |      |        |        |        | Census |        |        |        |        |      | Census |        |        |        |        |        | Census |        |        |        |        |
| Nicaragua                        |        |        |        |        |        | Census |        |      |        |        |        |        |        |        |        | Census |      |        |        |        |        |        |        |        |        |        |        |        |
| Niger                            |        |        |        |        |        |        |        |      |        |        |        | Census |        |        |        |        |      |        |        |        |        |        | Census |        |        |        |        |        |
| Nigeria                          |        | Census |        |        |        |        |        |      |        |        |        |        |        |        |        |        |      | Census |        |        |        |        |        |        |        | Census |        |        |
| North Korea                      |        |        |        | Census |        |        |        |      |        |        |        |        |        |        |        |        |      |        | Census |        |        |        |        |        |        |        |        |        |
| Northern Mariana Islands         | Census |        |        |        |        | Census |        |      |        |        | Census |        |        |        |        |        |      |        |        |        |        |        | Census |        |        |        |        |        |
| Norway                           |        |        |        |        |        |        |        |      |        |        |        |        |        |        |        |        |      |        |        |        |        |        |        |        |        |        |        |        |
| Oman                             |        |        |        |        |        |        |        |      |        |        |        |        |        |        |        |        |      |        |        |        |        |        |        |        |        |        |        |        |
| Pakistan                         |        |        |        |        |        |        |        |      | Census |        |        |        |        |        |        |        |      |        |        |        |        |        |        |        |        |        |        | Census |
| Palestine                        |        |        |        |        |        |        |        |      | Census |        |        |        |        |        |        |        |      |        | Census |        |        |        |        |        |        |        |        | Census |
| Panama                           | Census |        |        |        |        |        |        |      |        |        |        | Census |        |        |        |        |      |        |        |        |        |        | Census |        |        |        |        |        |
| Papua New Guinea                 | Census |        |        |        |        |        |        |      |        |        | Census |        |        |        |        |        |      |        |        |        |        |        |        |        |        |        |        |        |
| Paraguay                         |        |        | Census |        |        |        |        |      |        |        |        |        | Census |        |        |        |      |        |        |        |        |        |        |        |        |        |        |        |
| Peru                             |        |        |        | Census |        |        |        |      |        |        |        |        |        |        |        | Census |      | Census |        |        |        |        |        |        |        |        |        |        |
| Philippines                      | Census |        |        |        |        | Census |        |      |        |        | Census |        |        |        |        |        |      | Census |        |        |        | Census |        |        |        |        | Census |        |
| Poland                           |        |        |        |        |        |        |        |      |        |        |        |        | Census |        |        |        |      |        |        |        |        |        |        |        |        |        |        |        |
| Portugal                         |        | Census |        |        |        |        |        |      |        |        |        | Census |        |        |        |        |      |        |        |        |        |        |        | Census |        |        |        |        |
| Puerto Rico                      | Census |        |        |        |        |        |        |      |        |        | Census |        |        |        |        |        |      |        |        |        |        |        | Census |        |        |        |        |        |
| Qatar                            |        |        |        |        |        |        |        |      | Census |        |        |        |        |        |        | Census |      |        |        |        |        |        | Census |        |        |        | Census |        |
| Romania                          |        |        | Census |        |        |        |        |      |        |        |        |        | Census |        |        |        |      |        |        |        |        |        |        | Census |        |        |        |        |
| Russia                           |        |        |        |        |        |        |        |      |        |        |        |        | Census |        |        |        |      |        |        |        |        |        | Census |        |        |        |        |        |
| Rwanda                           |        | Census |        |        |        |        |        |      |        |        |        |        | Census |        |        |        |      |        |        |        |        |        |        | Census |        |        |        |        |
| Saint Lucia                      |        | Census |        |        |        |        |        |      |        |        |        |        | Census |        |        |        |      |        |        |        |        |        | Census |        |        |        |        |        |
| Saint Vincent and the Grenadines |        | Census |        |        |        |        |        |      |        |        |        |        | Census |        |        |        |      |        |        |        |        |        |        | Census |        |        |        |        |
| Samoa                            |        | Census |        |        |        |        |        |      |        |        |        | Census |        |        |        |        |      | Census |        |        |        |        | Census |        |        |        | Census |        |
| Sao Tome and Principe            |        | Census |        |        |        |        |        |      |        |        |        | Census |        |        |        |        |      |        |        |        |        |        |        | Census |        |        |        |        |
| Saudi Arabia                     |        |        | Census |        |        |        |        |      |        |        |        |        |        |        | Census |        |      |        |        |        |        |        | Census |        |        |        |        |        |
| Senegal                          |        |        |        |        |        |        |        |      |        |        |        |        | Census |        |        |        |      |        |        |        |        |        |        |        | Census |        |        |        |
| Serbia                           |        | Census |        |        |        |        |        |      |        |        |        |        | Census |        |        |        |      |        |        |        |        |        | Census |        |        |        |        |        |

**Supplementary figure 1 . Census or population registry status and coverage of a population and housing census within the last 10 years, by location, from 1990-2017.** Per SDG indicator 17.19.2a, the target is that each country is to have conducted a population and housing census in the last 10 years, or have a population registry from which detailed population and housing statistics are derived. Census years are designated by a dark blue colouring, followed by a lighter blue colour indicating census coverage for the 9 years following a census for a total of 10 years of census coverage. A medium blue colour is used to designate the implementation of a population registry. White indicates that a given location-year is not covered by a population and housing census or population registry. Census status for 1990-2000 was informed by censuses conducted from 1980-1989, which are not shown here. SDG=Sustainable Development Goal.

| Location name              | 1990   | 1991   | 1992 | 1993   | 1994   | 1995   | 1996   | 1997   | 1998   | 1999   | 2000   | 2001   | 2002   | 2003   | 2004   | 2005   | 2006   | 2007   | 2008 | 2009   | 2010   | 2011   | 2012   | 2013   | 2014 | 2015 | 2016   | 2017 |
|----------------------------|--------|--------|------|--------|--------|--------|--------|--------|--------|--------|--------|--------|--------|--------|--------|--------|--------|--------|------|--------|--------|--------|--------|--------|------|------|--------|------|
| Seychelles                 |        |        |      |        | Census |        |        | Census |        |        |        |        | Census |        |        |        |        |        |      |        | Census |        |        |        |      |      |        |      |
| Sierra Leone               |        |        |      |        |        |        |        |        |        |        |        |        |        |        | Census |        |        |        |      |        |        |        |        |        |      |      | Census |      |
| Singapore                  | Census |        |      |        |        |        |        |        |        |        |        |        |        |        |        |        |        |        |      |        |        |        |        |        |      |      |        |      |
| Slovakia                   |        |        |      |        |        |        |        |        |        |        |        |        |        |        |        |        |        |        |      |        |        |        |        |        |      |      |        |      |
| Slovenia                   |        | Census |      |        |        |        |        |        |        |        |        |        |        |        |        |        |        |        |      |        |        |        |        |        |      |      |        |      |
| Solomon Islands            |        |        |      |        |        |        |        |        | Census |        |        |        |        |        |        |        |        |        |      |        | Census |        |        |        |      |      |        |      |
| Somalia                    |        |        |      |        |        |        |        |        |        |        |        |        |        |        |        |        |        |        |      |        |        |        |        |        |      |      |        |      |
| South Africa               |        | Census |      |        |        | Census |        |        |        |        |        | Census |        |        |        |        |        |        |      |        |        |        | Census |        |      |      |        |      |
| South Korea                | Census |        |      |        |        | Census |        |        |        |        | Census |        |        |        |        | Census |        |        |      |        |        | Census |        |        |      |      | Census |      |
| South Sudan                |        |        |      | Census |        |        |        |        |        |        |        |        |        |        |        |        |        |        |      | Census |        |        |        |        |      |      |        |      |
| Spain                      |        | Census |      |        |        |        |        |        |        |        |        |        |        |        |        |        |        |        |      |        |        |        |        |        |      |      |        |      |
| Sri Lanka                  |        |        |      |        |        |        |        |        |        |        |        | Census |        |        |        |        |        |        |      |        |        |        | Census |        |      |      |        |      |
| Sudan                      |        |        |      | Census |        |        |        |        |        |        |        |        |        |        |        |        |        |        |      | Census |        |        |        |        |      |      |        |      |
| Suriname                   |        |        |      |        |        |        |        |        |        |        | Census |        |        |        | Census |        |        |        |      |        |        |        | Census |        |      |      |        |      |
| Swaziland                  |        |        |      |        |        |        | Census |        |        |        |        |        |        |        |        |        |        | Census |      |        |        |        |        |        |      |      | Census |      |
| Sweden                     |        |        |      |        |        |        |        |        |        |        |        |        |        |        |        |        |        |        |      |        |        |        |        |        |      |      |        |      |
| Switzerland                | Census |        |      |        |        |        |        |        |        |        | Census |        |        |        |        |        |        |        |      |        |        |        |        |        |      |      |        |      |
| Syria                      |        |        |      |        | Census |        |        |        |        |        |        |        |        |        | Census |        |        |        |      |        |        |        |        |        |      |      |        |      |
| Taiwan (Province of China) |        |        |      |        |        |        |        |        |        |        |        |        |        |        |        |        |        |        |      |        |        |        |        |        |      |      |        |      |
| Tajikistan                 |        |        |      |        |        |        |        |        |        |        | Census |        |        |        |        |        |        |        |      |        |        | Census |        |        |      |      |        |      |
| Tanzania                   |        |        |      |        |        |        |        |        |        |        |        |        | Census |        |        |        |        |        |      |        |        |        |        | Census |      |      |        |      |
| Thailand                   | Census |        |      |        |        |        |        |        |        |        | Census |        |        |        |        |        |        |        |      |        |        | Census |        |        |      |      |        |      |
| The Bahamas                | Census |        |      |        |        |        |        |        |        |        | Census |        |        |        |        |        |        |        |      |        |        | Census |        |        |      |      |        |      |
| The Gambia                 |        |        |      | Census |        |        |        |        |        |        |        |        |        | Census |        |        |        |        |      |        |        |        |        | Census |      |      |        |      |
| Timor-Leste                | Census |        |      |        |        |        |        |        |        |        |        |        |        |        | Census |        |        |        |      |        |        | Census |        |        |      |      | Census |      |
| Togo                       |        |        |      |        |        |        |        |        |        |        |        |        |        |        |        |        |        |        |      |        |        | Census |        |        |      |      |        |      |
| Tonga                      |        |        |      |        |        | Census |        |        |        |        |        |        |        |        |        |        | Census |        |      |        |        | Census |        |        |      |      | Census |      |
| Trinidad and Tobago        | Census |        |      |        |        |        |        |        |        |        | Census |        |        |        |        |        |        |        |      |        |        |        | Census |        |      |      |        |      |
| Tunisia                    |        |        |      |        |        |        | Census |        |        |        |        |        |        |        |        | Census |        |        |      |        |        |        |        |        |      |      |        |      |
| Turkey                     | Census |        |      |        |        |        |        |        |        |        | Census |        |        |        |        |        |        |        |      |        |        |        |        |        |      |      | Census |      |
| Turkmenistan               |        |        |      |        |        | Census |        |        |        |        |        |        |        |        |        |        |        |        |      |        |        |        | Census |        |      |      | Census |      |
| Uganda                     |        | Census |      |        |        |        |        |        |        |        |        |        | Census |        |        |        |        |        |      |        |        |        |        |        |      |      | Census |      |
| Ukraine                    |        |        |      |        |        |        |        |        |        |        |        | Census |        |        |        |        |        |        |      |        |        |        |        |        |      |      |        |      |
| United Arab Emirates       |        |        |      |        |        | Census |        |        |        |        |        |        |        |        |        | Census |        |        |      |        |        |        |        |        |      |      |        |      |
| United Kingdom             |        | Census |      |        |        |        |        |        |        |        |        | Census |        |        |        |        |        |        |      |        |        |        | Census |        |      |      |        |      |
| United States              | Census |        |      |        |        |        |        |        |        |        | Census |        |        |        |        |        |        |        |      |        |        |        | Census |        |      |      |        |      |
| Uruguay                    |        |        |      |        |        |        | Census |        |        |        |        |        |        |        | Census |        |        |        |      |        |        |        | Census |        |      |      |        |      |
| Uzbekistan                 |        |        |      |        |        |        |        |        |        |        |        |        |        |        |        |        |        |        |      |        |        |        |        |        |      |      |        |      |
| Vanuatu                    |        |        |      |        |        |        |        |        |        | Census |        |        |        |        |        |        |        |        |      |        |        | Census |        |        |      |      | Census |      |
| Venezuela                  | Census |        |      |        |        |        |        |        |        |        |        | Census |        |        |        |        |        |        |      |        |        |        | Census |        |      |      |        |      |
| Vietnam                    |        |        |      |        |        |        |        |        |        | Census |        |        |        |        |        |        |        |        |      |        |        | Census |        |        |      |      |        |      |
| Virgin Islands             | Census |        |      |        |        |        |        |        |        |        | Census |        |        |        |        |        |        |        |      |        |        |        | Census |        |      |      |        |      |
| Yemen                      |        |        |      |        | Census |        |        |        |        |        |        |        |        |        | Census |        |        |        |      |        |        |        |        |        |      |      |        |      |
| Zambia                     | Census |        |      |        |        |        |        |        |        |        | Census |        |        |        |        |        |        |        |      |        |        |        | Census |        |      |      |        |      |
| Zimbabwe                   |        | Census |      |        |        |        |        |        |        |        |        |        | Census |        |        |        |        |        |      |        |        |        |        | Census |      |      |        |      |

Supplementary figure 2. Map of health-related SDG Index, by decile, in 1990, 2000, and 2017, for Japan (A).

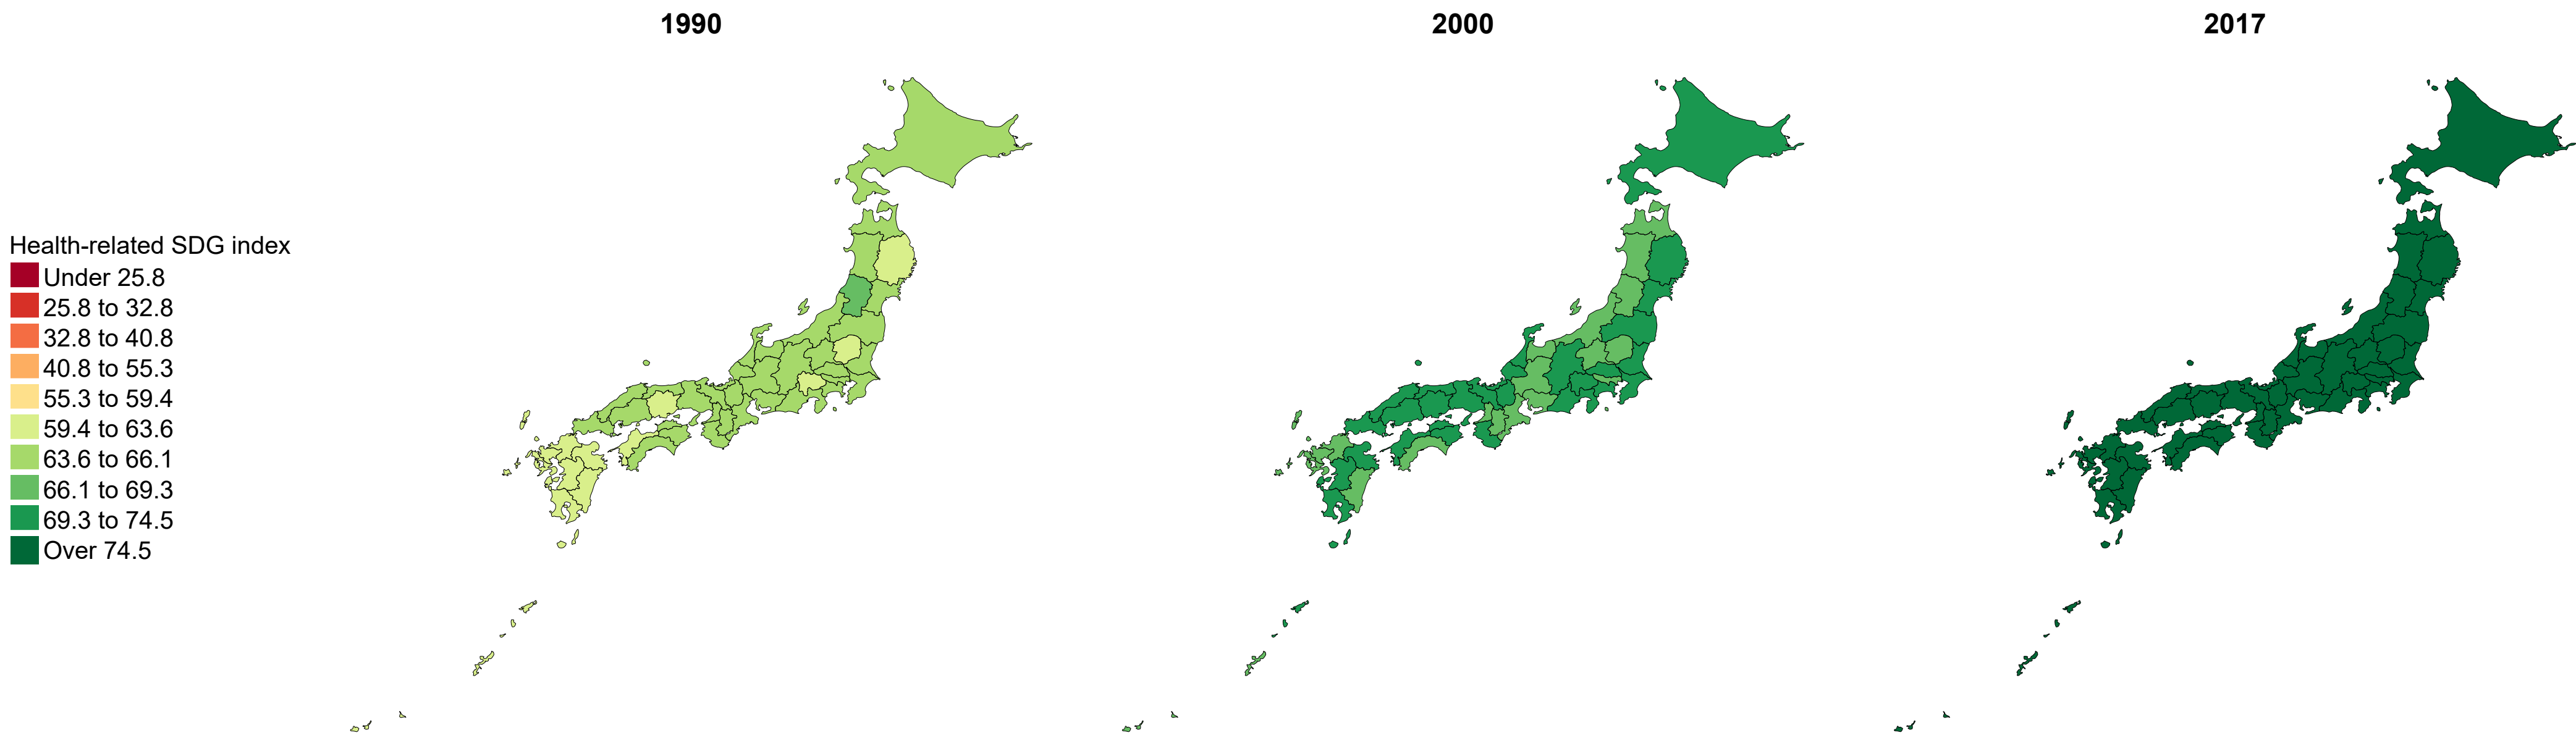

Supplementary figure 2. Map of health-related SDG Index, by decile, in 1990, 2000, and 2017, for Sweden (B).

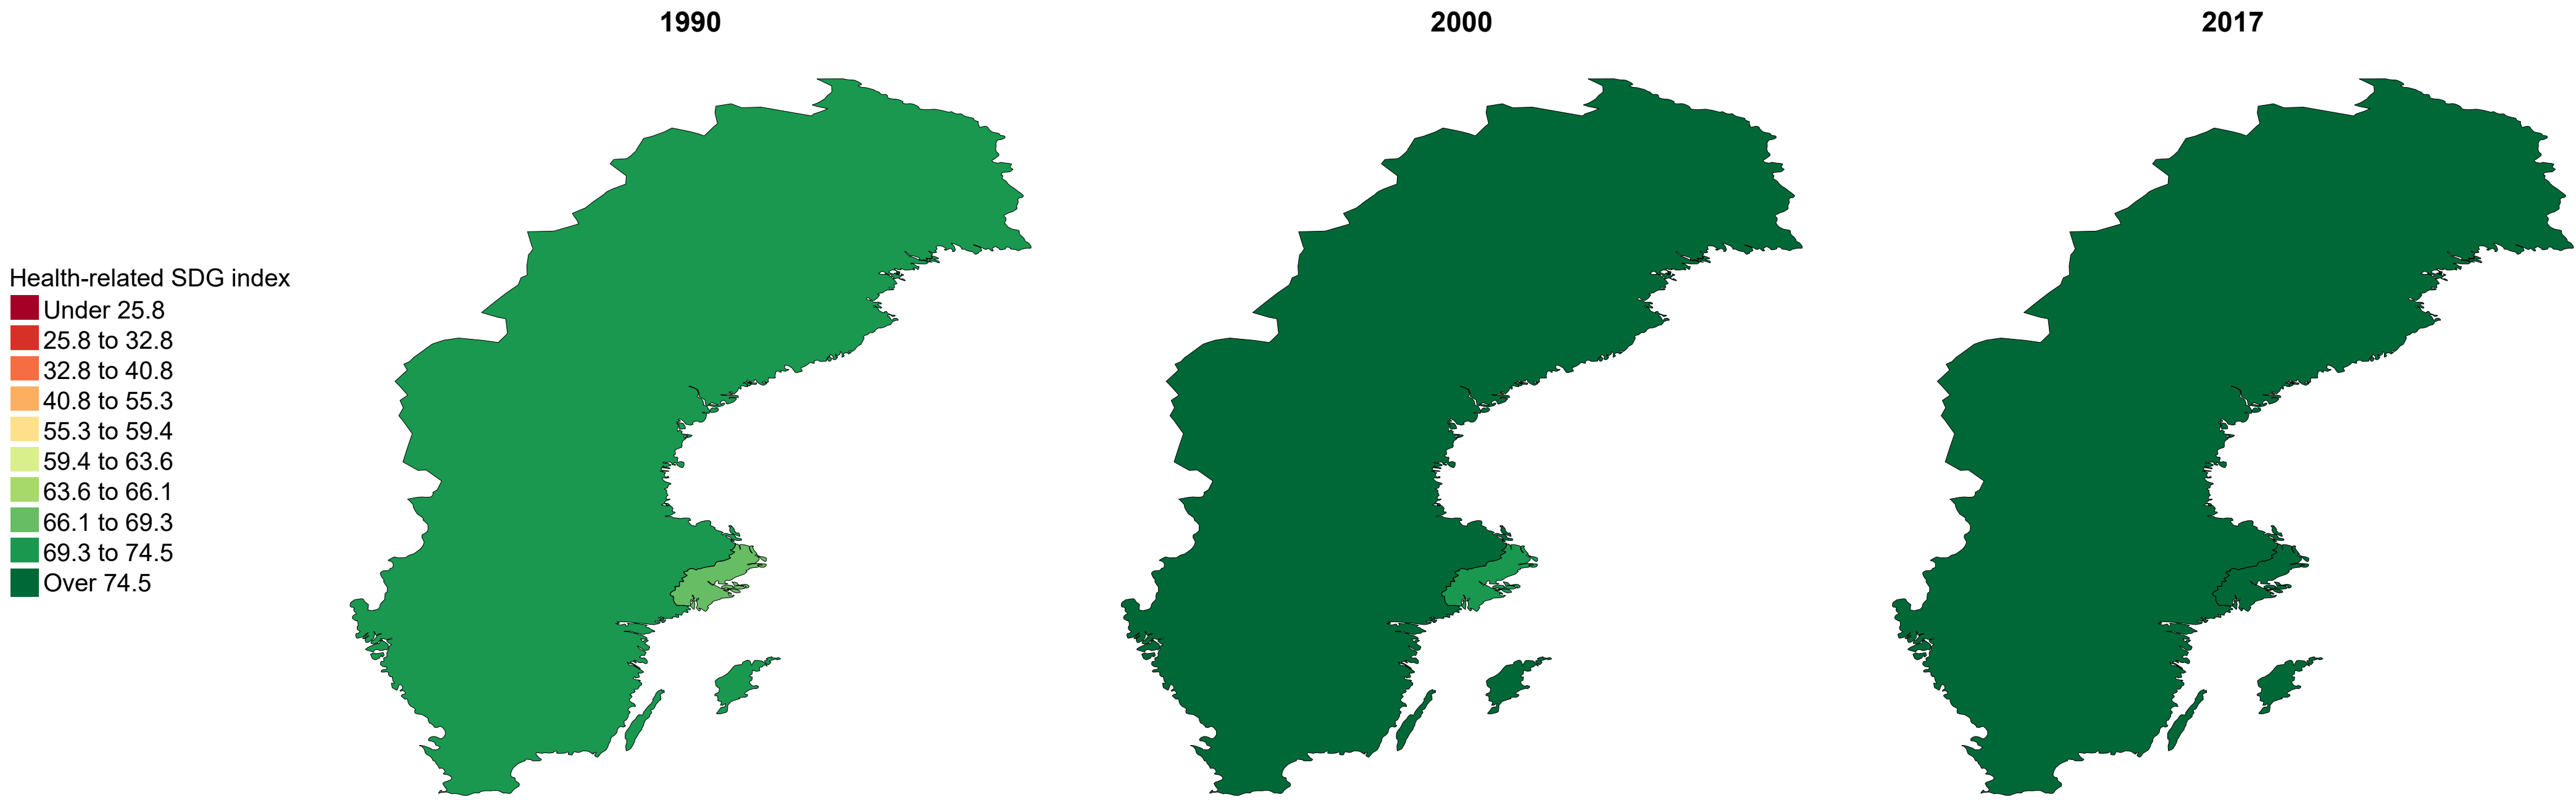

Supplementary figure 2. Map of health-related SDG Index, by decile, in 1990, 2000, and 2017, for England (C).

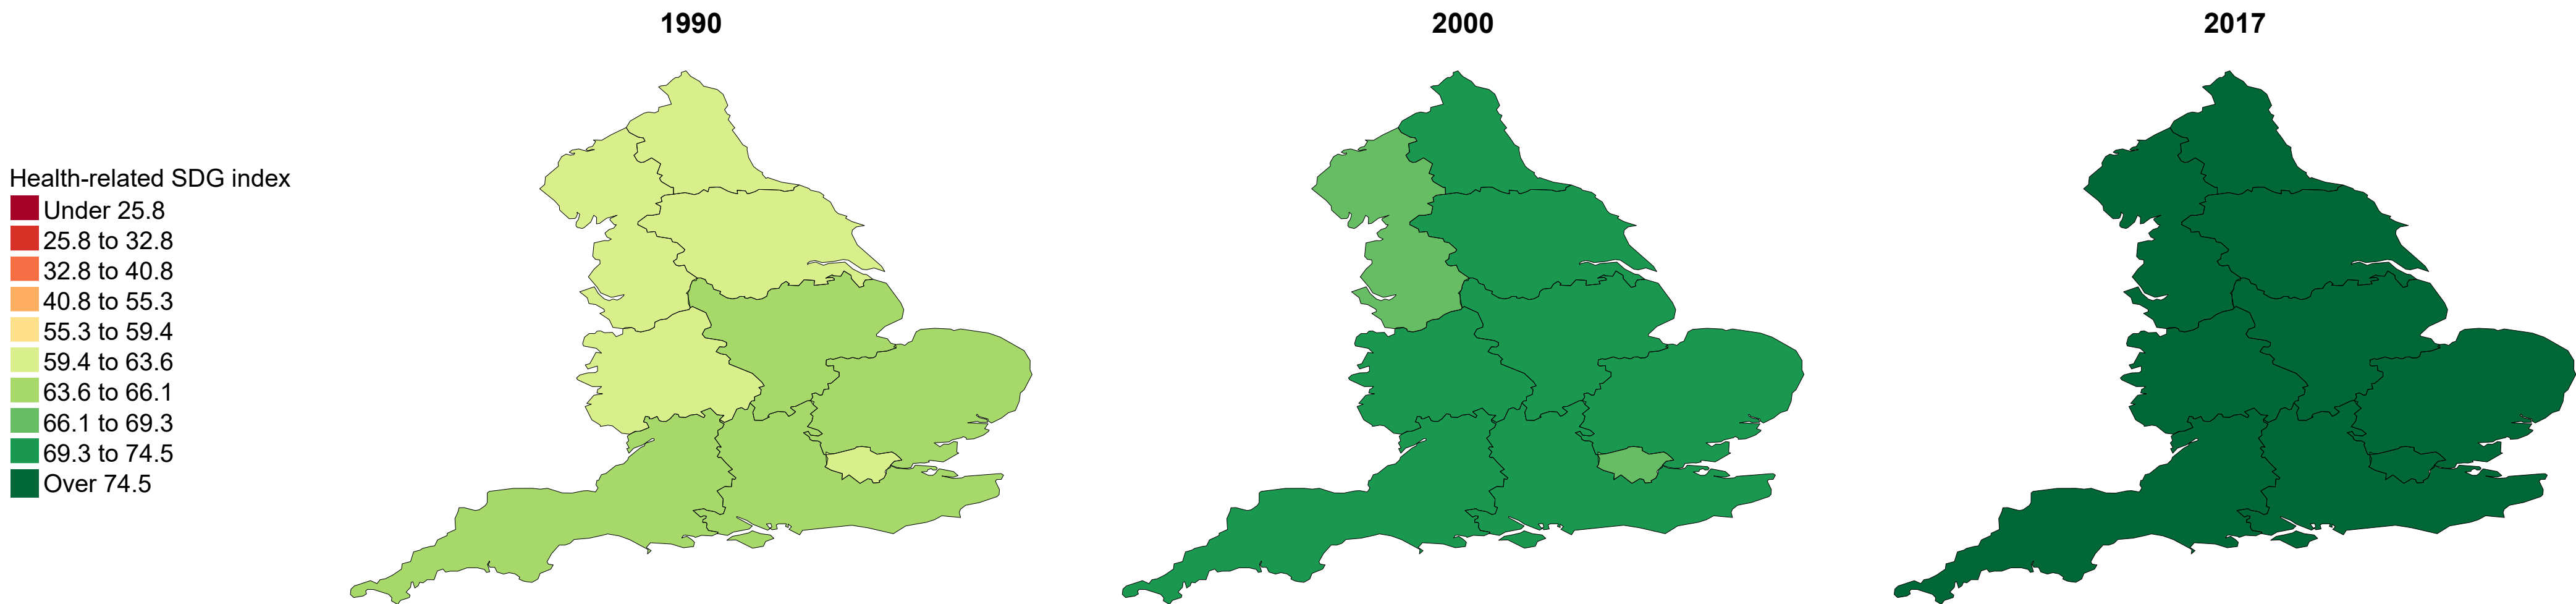



Supplementary figure 2. Map of health-related SDG Index, by decile, in 1990, 2000, and 2017, for the United States (D).

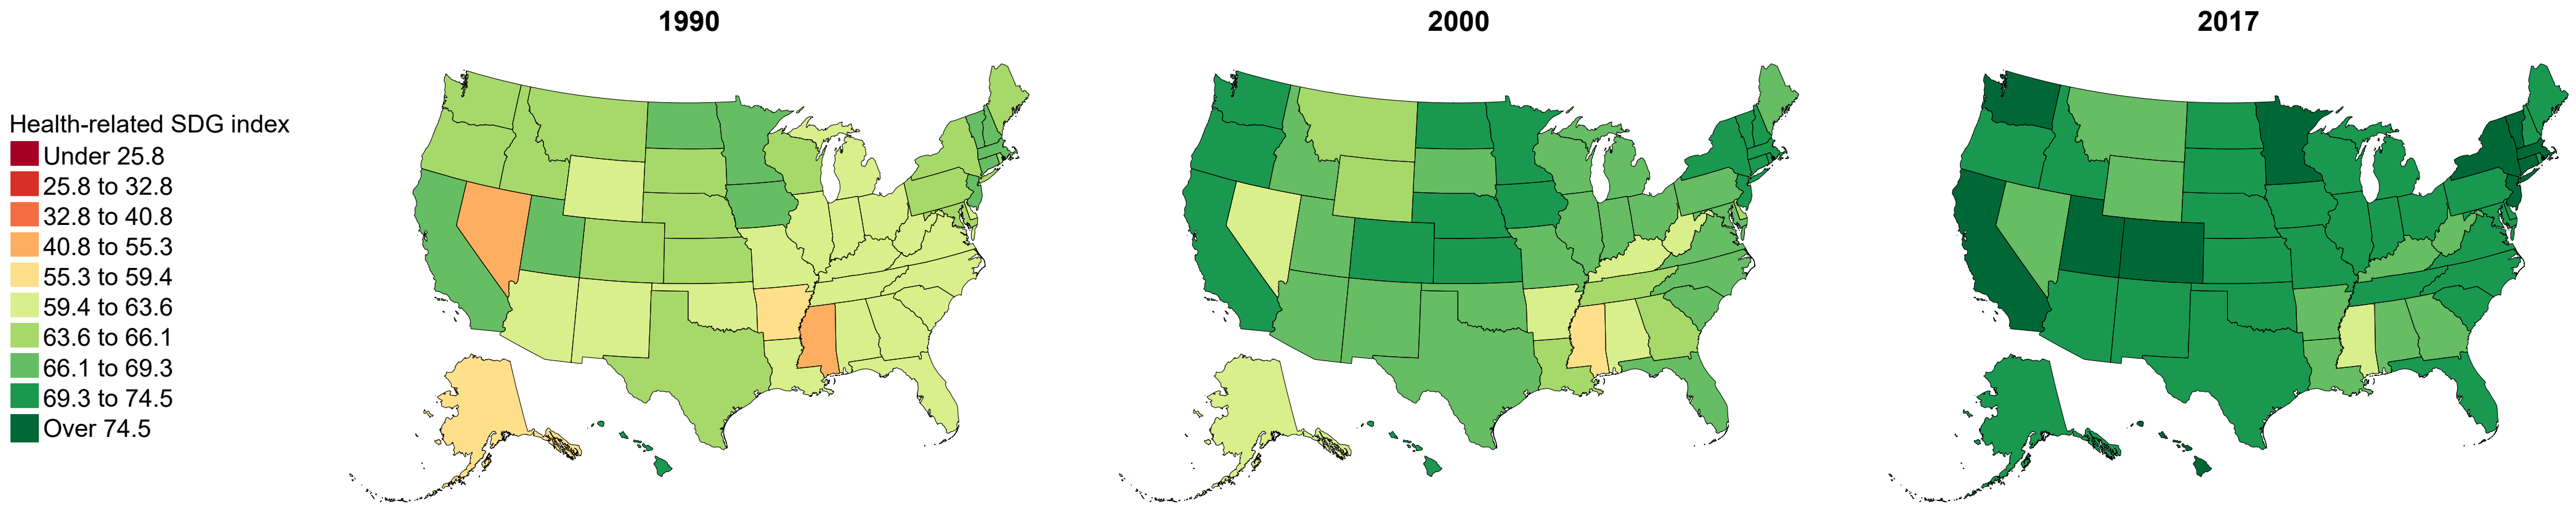

Supplementary figure 2. Map of health-related SDG Index, by decile, in 1990, 2000, and 2017, for Mexico (E).

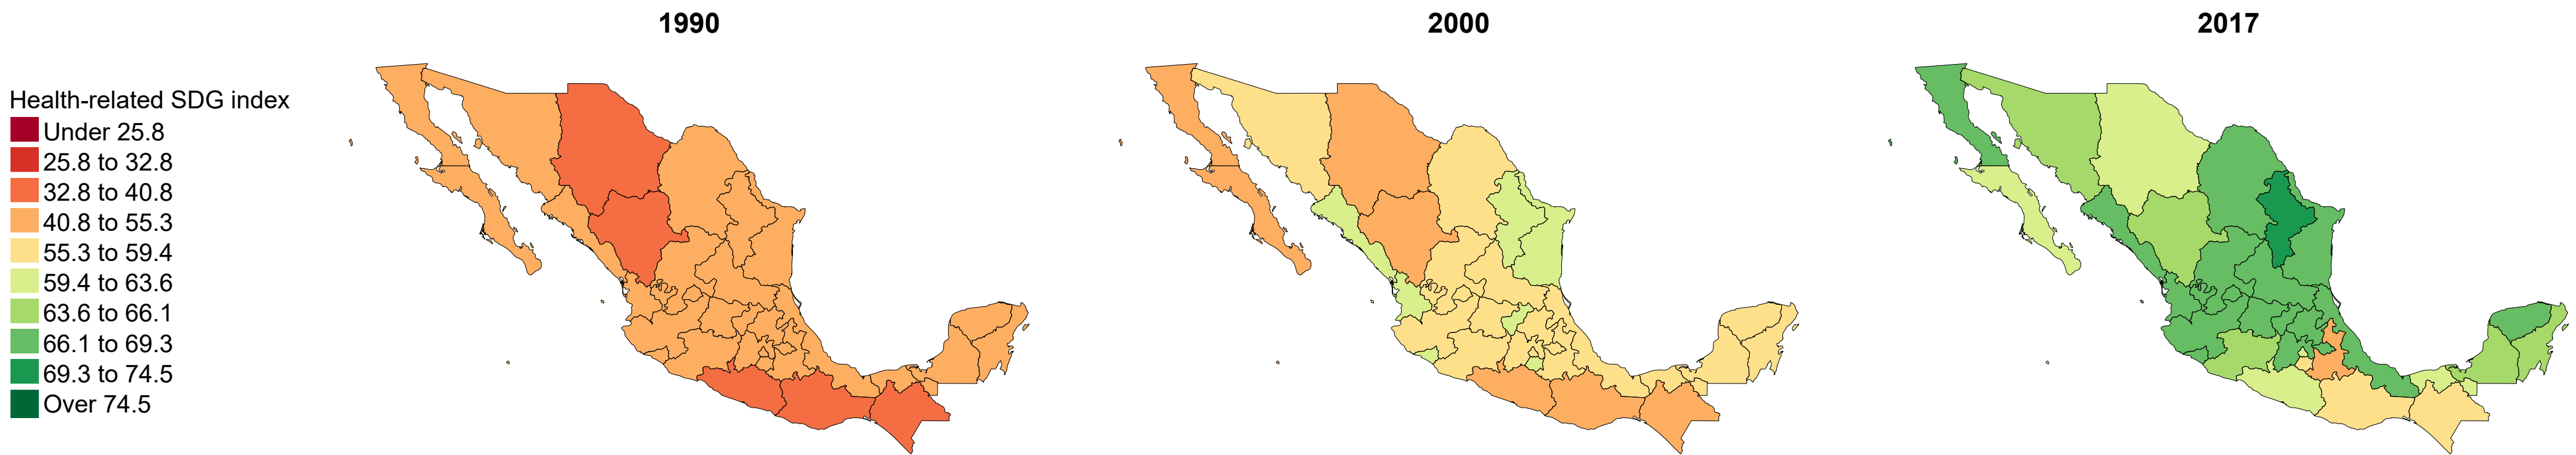

Supplementary figure 2. Map of health-related SDG Index, by decile, in 1990, 2000, and 2017, for Brazil (F).

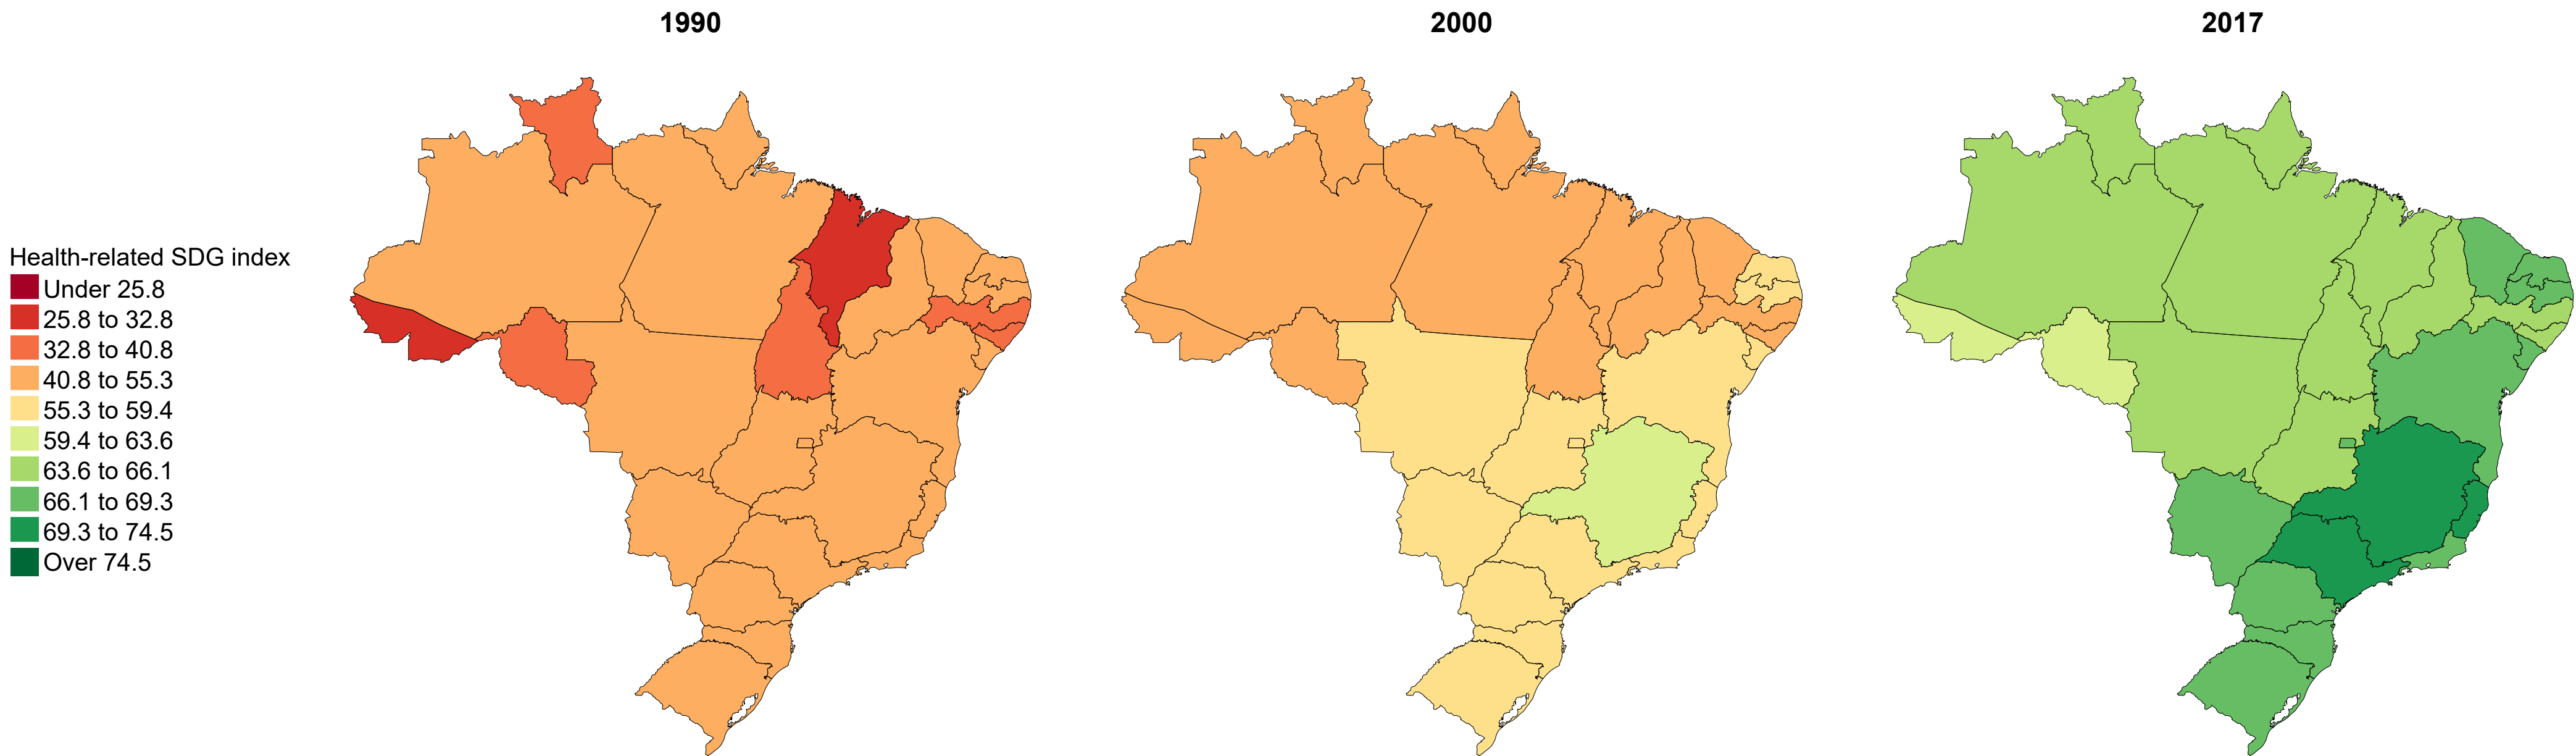

Supplementary figure 2. Map of health-related SDG Index, by decile, in 1990, 2000, and 2017, for India (G).

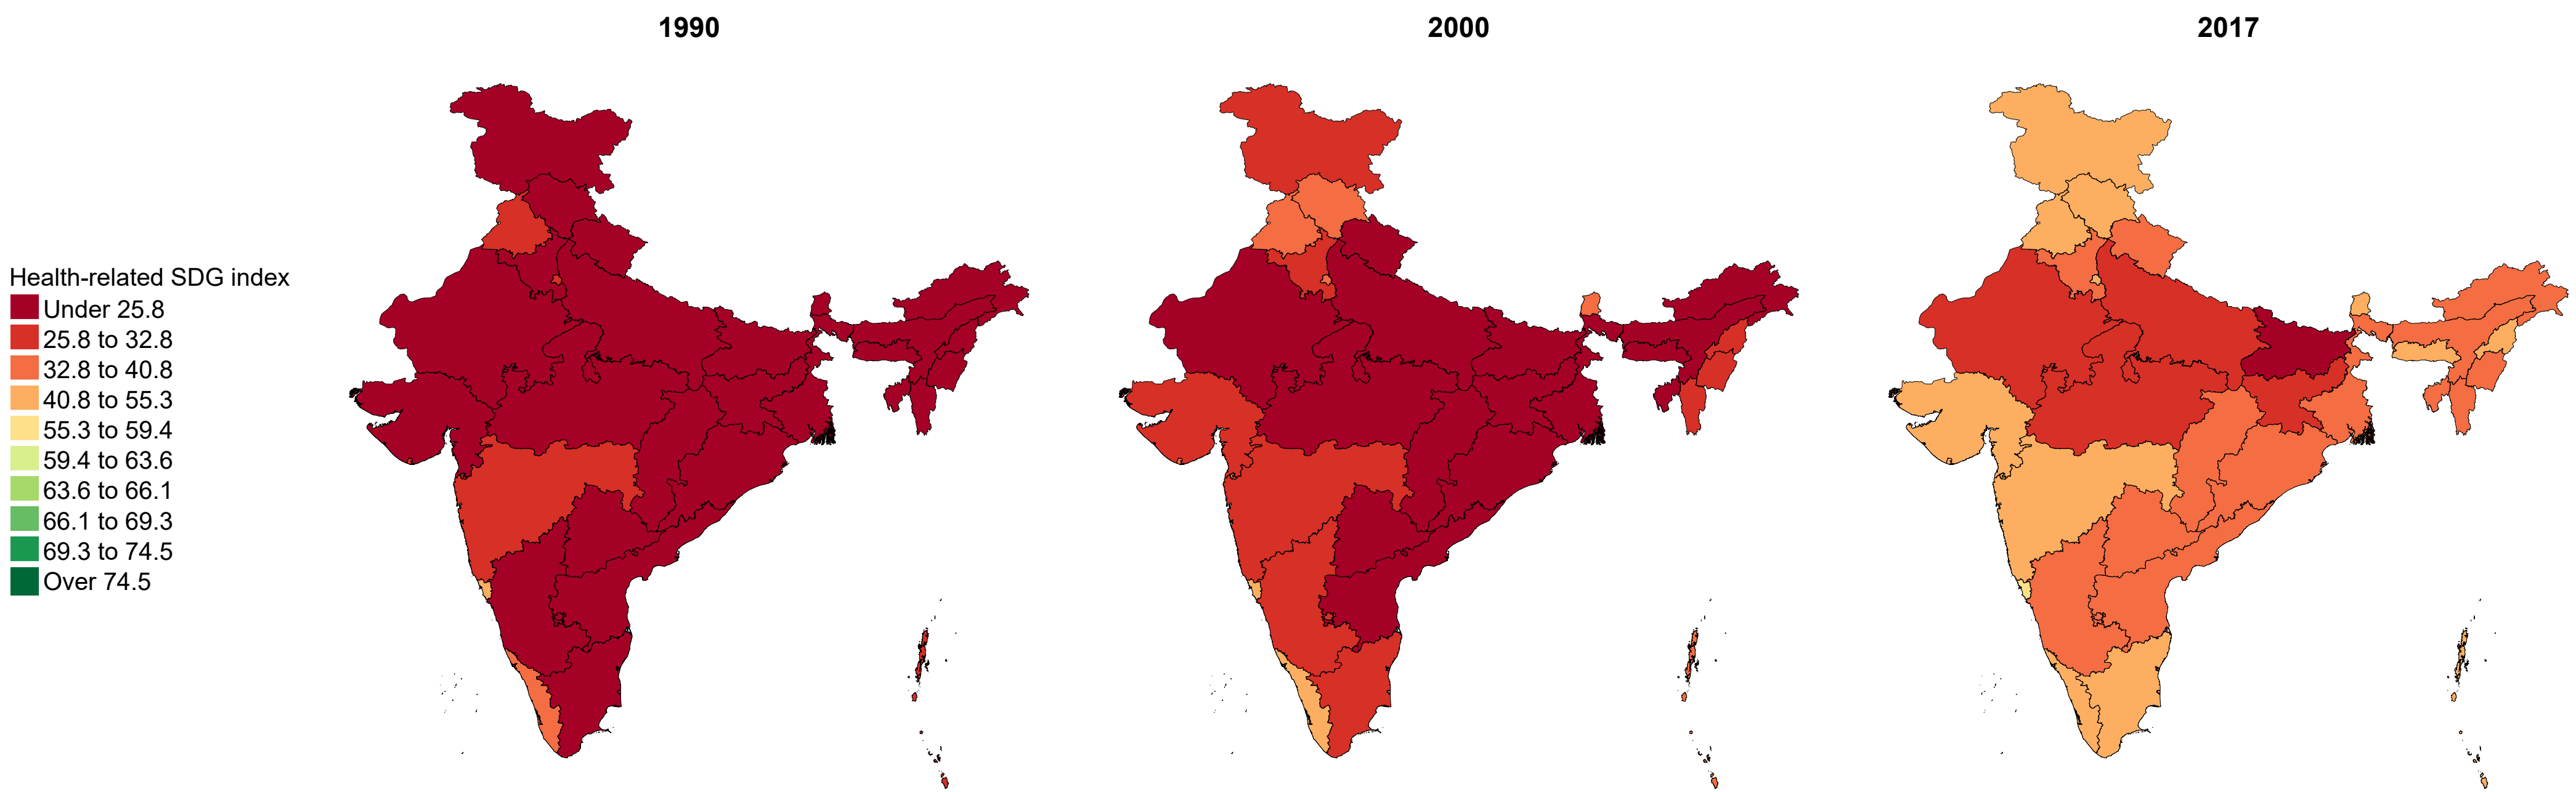

Supplementary figure 2. Map of health-related SDG Index, by decile, in 1990, 2000, and 2017, for Kenya (H).

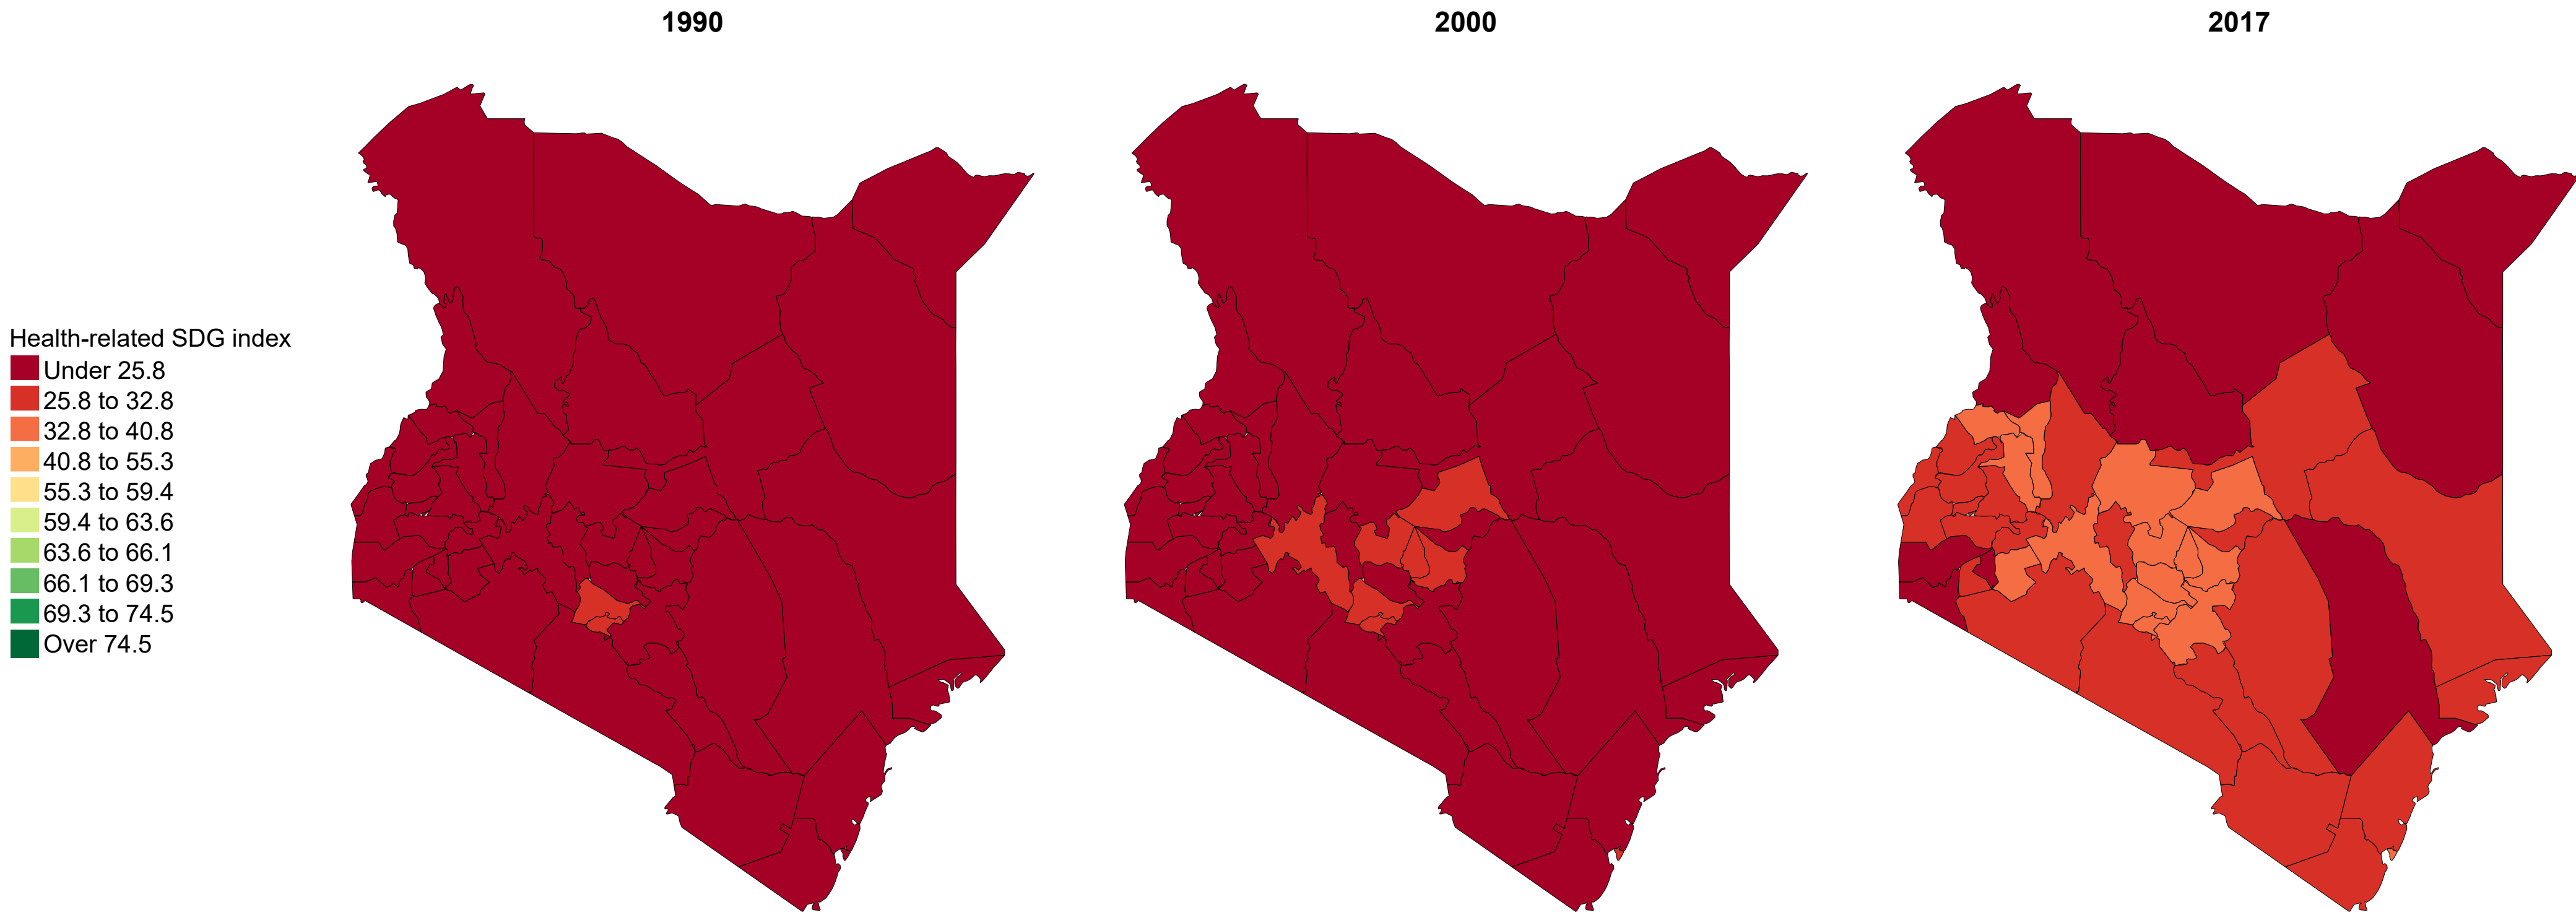

Supplementary figure 3. Projected performance, based on past trends, on the health-related SDG index and 40 individual health-related indicators, by country or territory, 2030

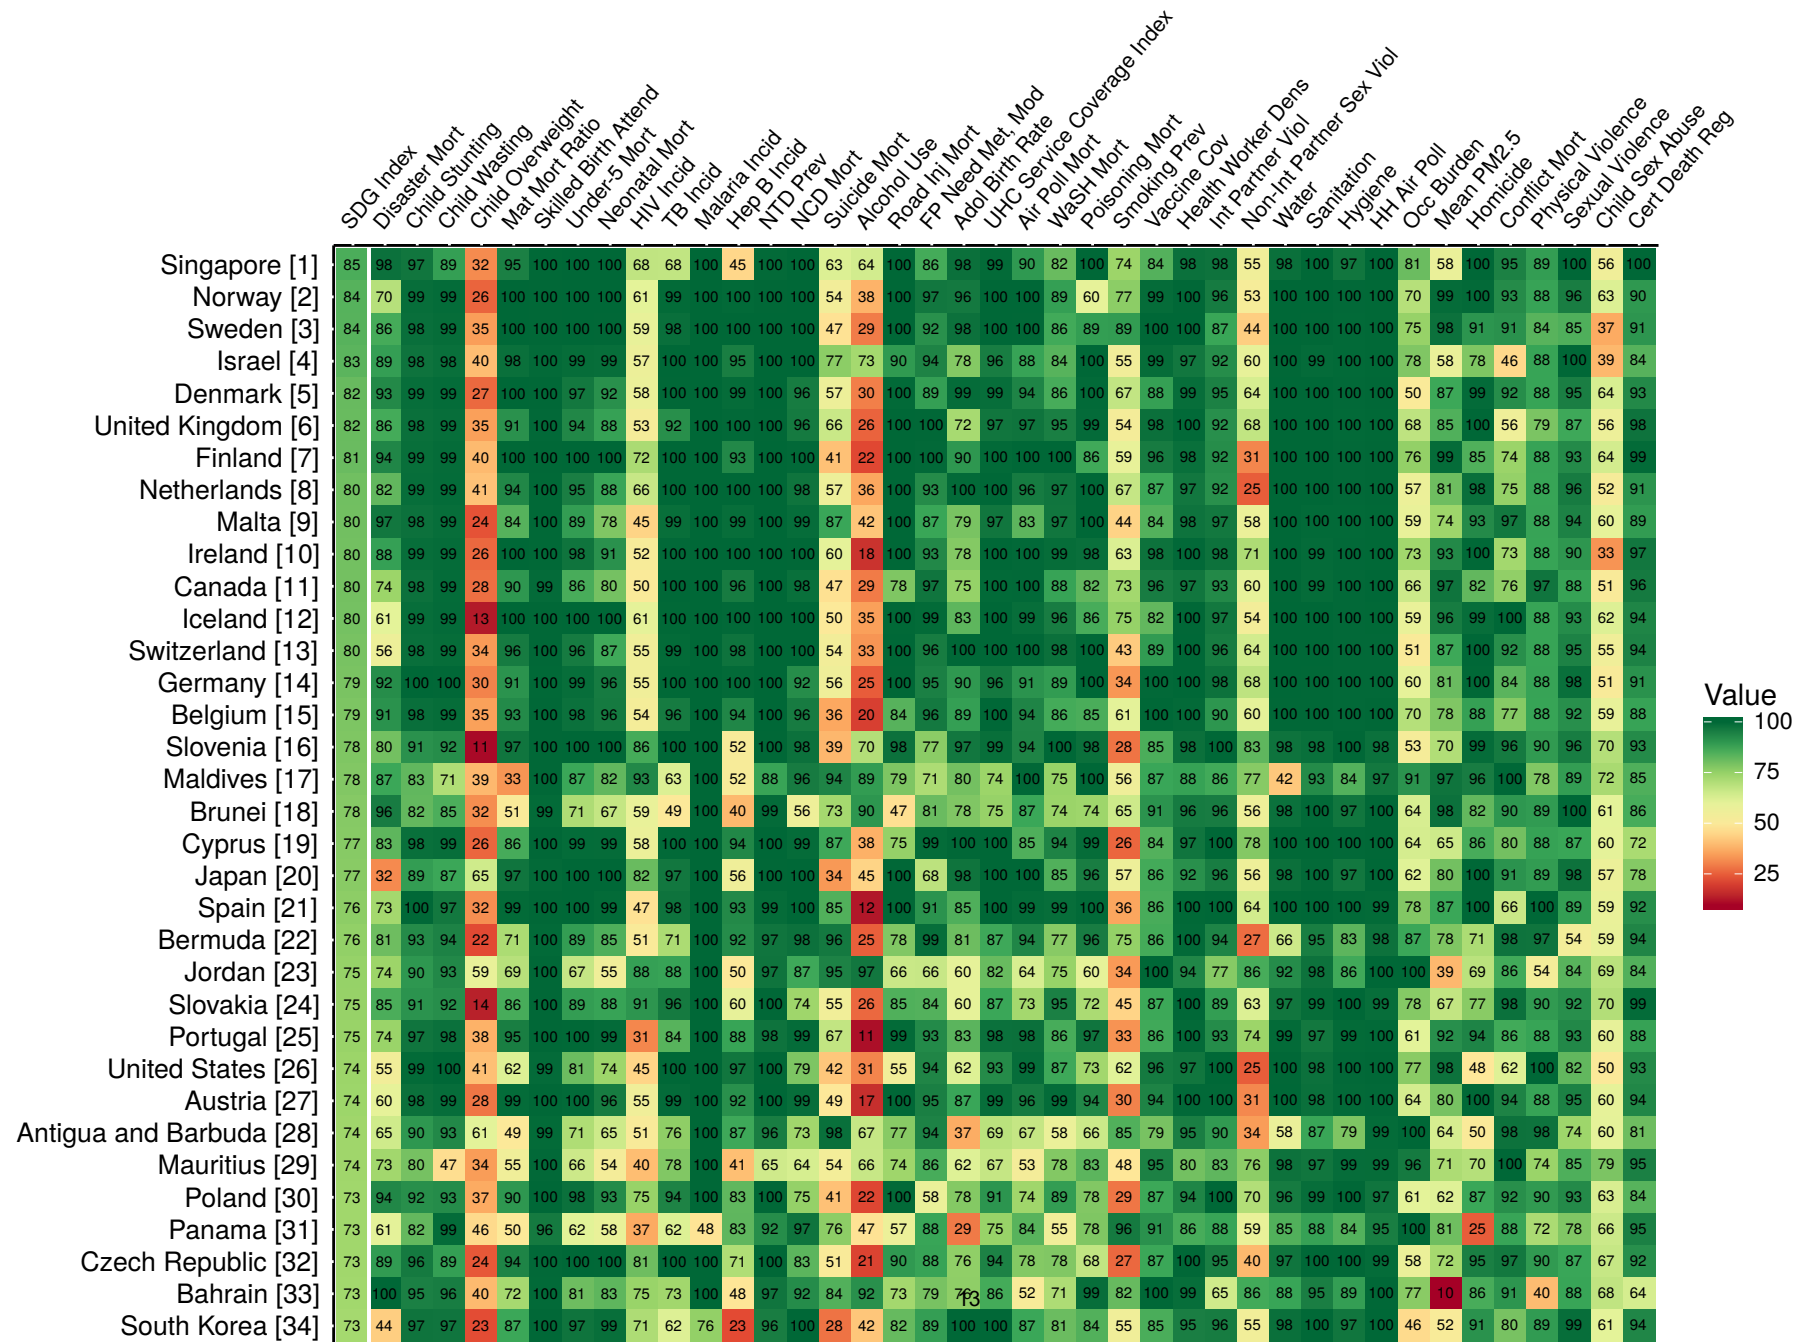



Supplementary figure 3. Projected performance, based on past trends, on the health-related SDG index and 40 individual health-related indicators, by country or territory, 2030

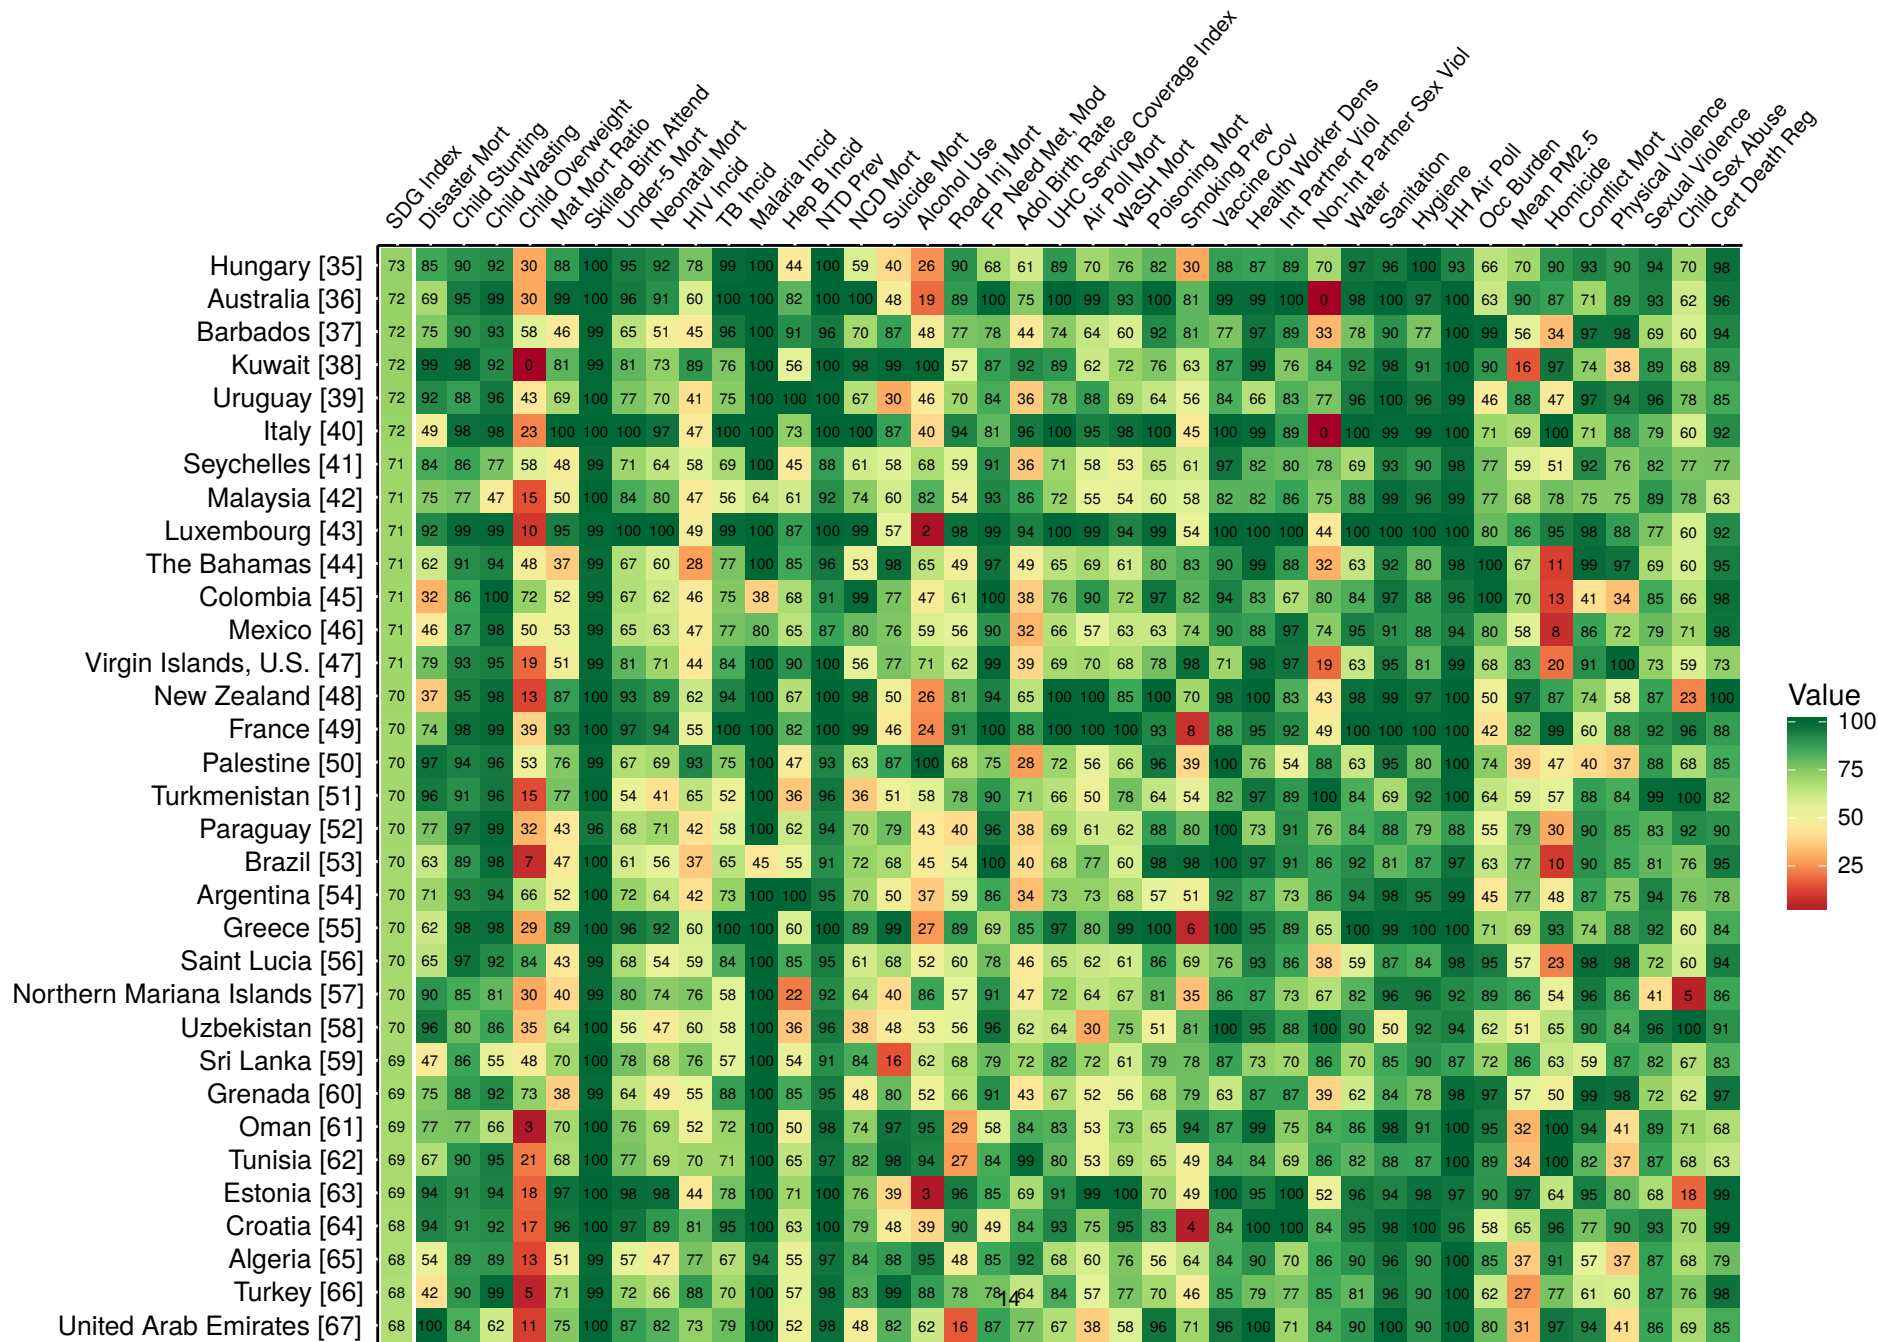

Supplementary figure 3. Projected performance, based on past trends, on the health-related SDG index and 40 individual health-related indicators, by country or territory, 2030

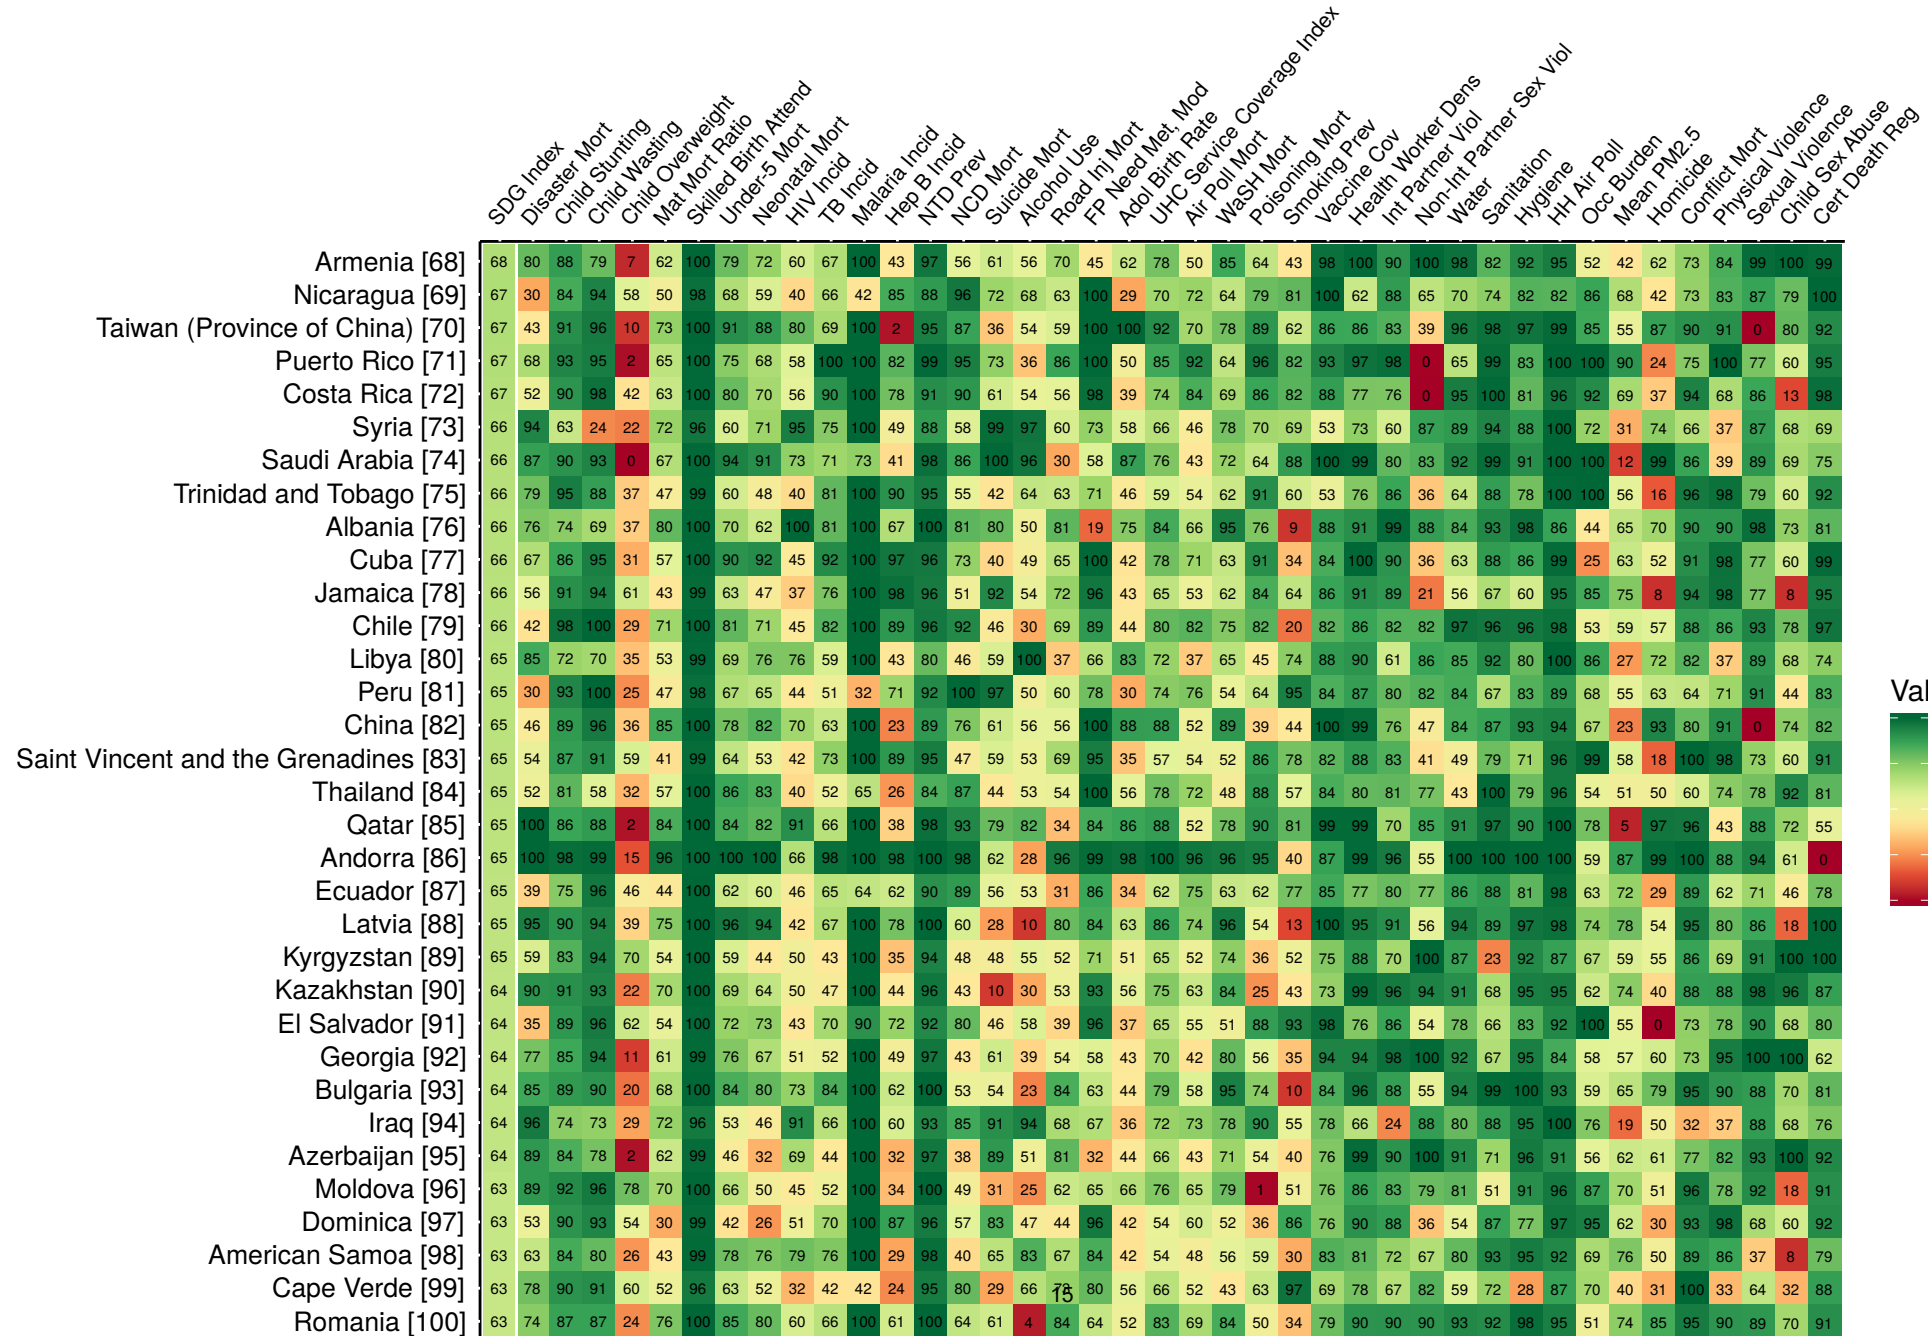



Supplementary figure 3. Projected performance, based on past trends, on the health-related SDG index and 40 individual health-related indicators, by country or territory, 2030

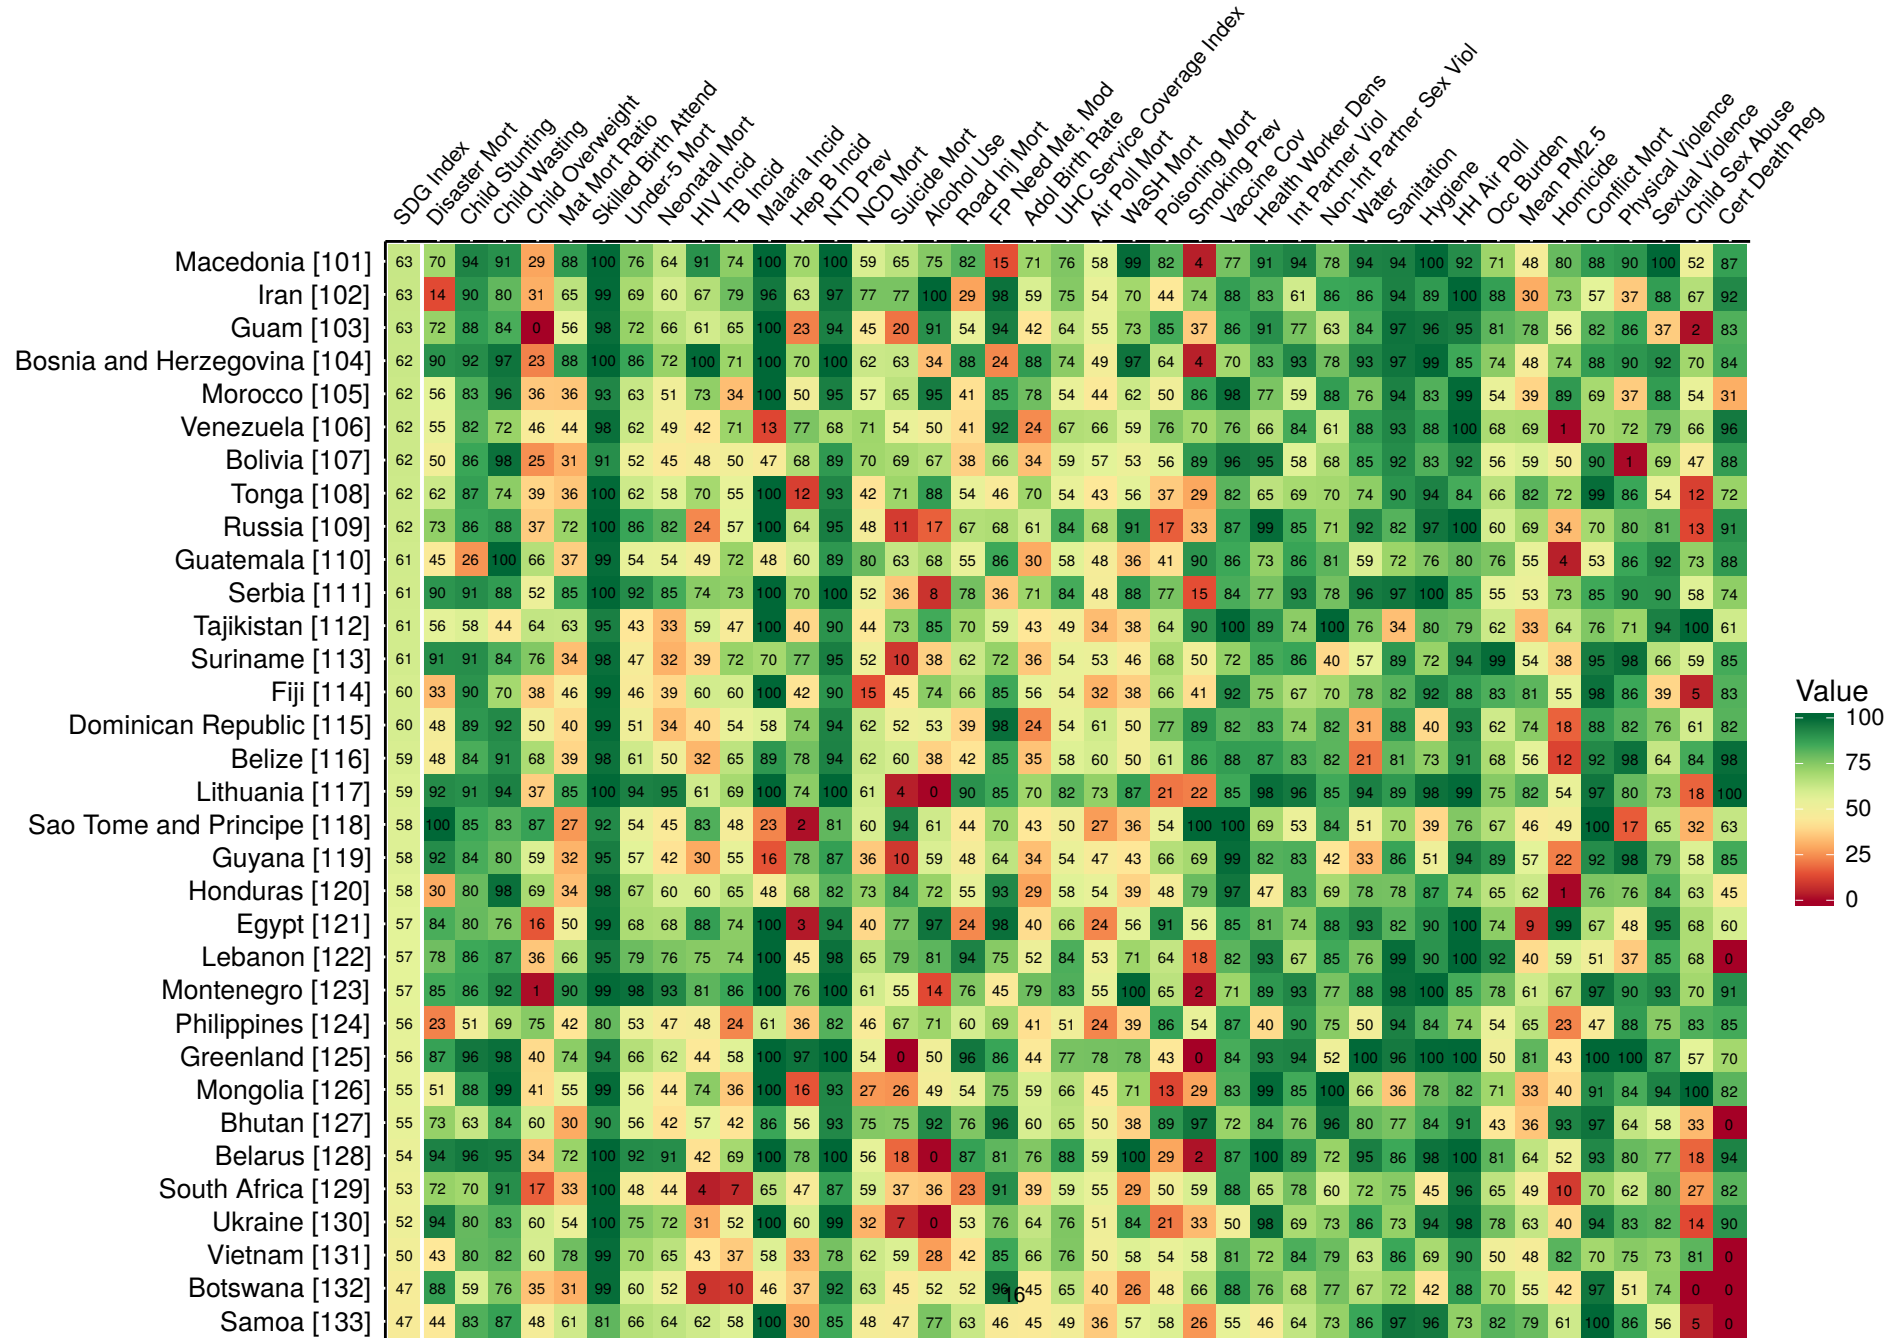

Supplementary figure 3. Projected performance, based on past trends, on the health-related SDG index and 40 individual health-related indicators, by country or territory, 2030

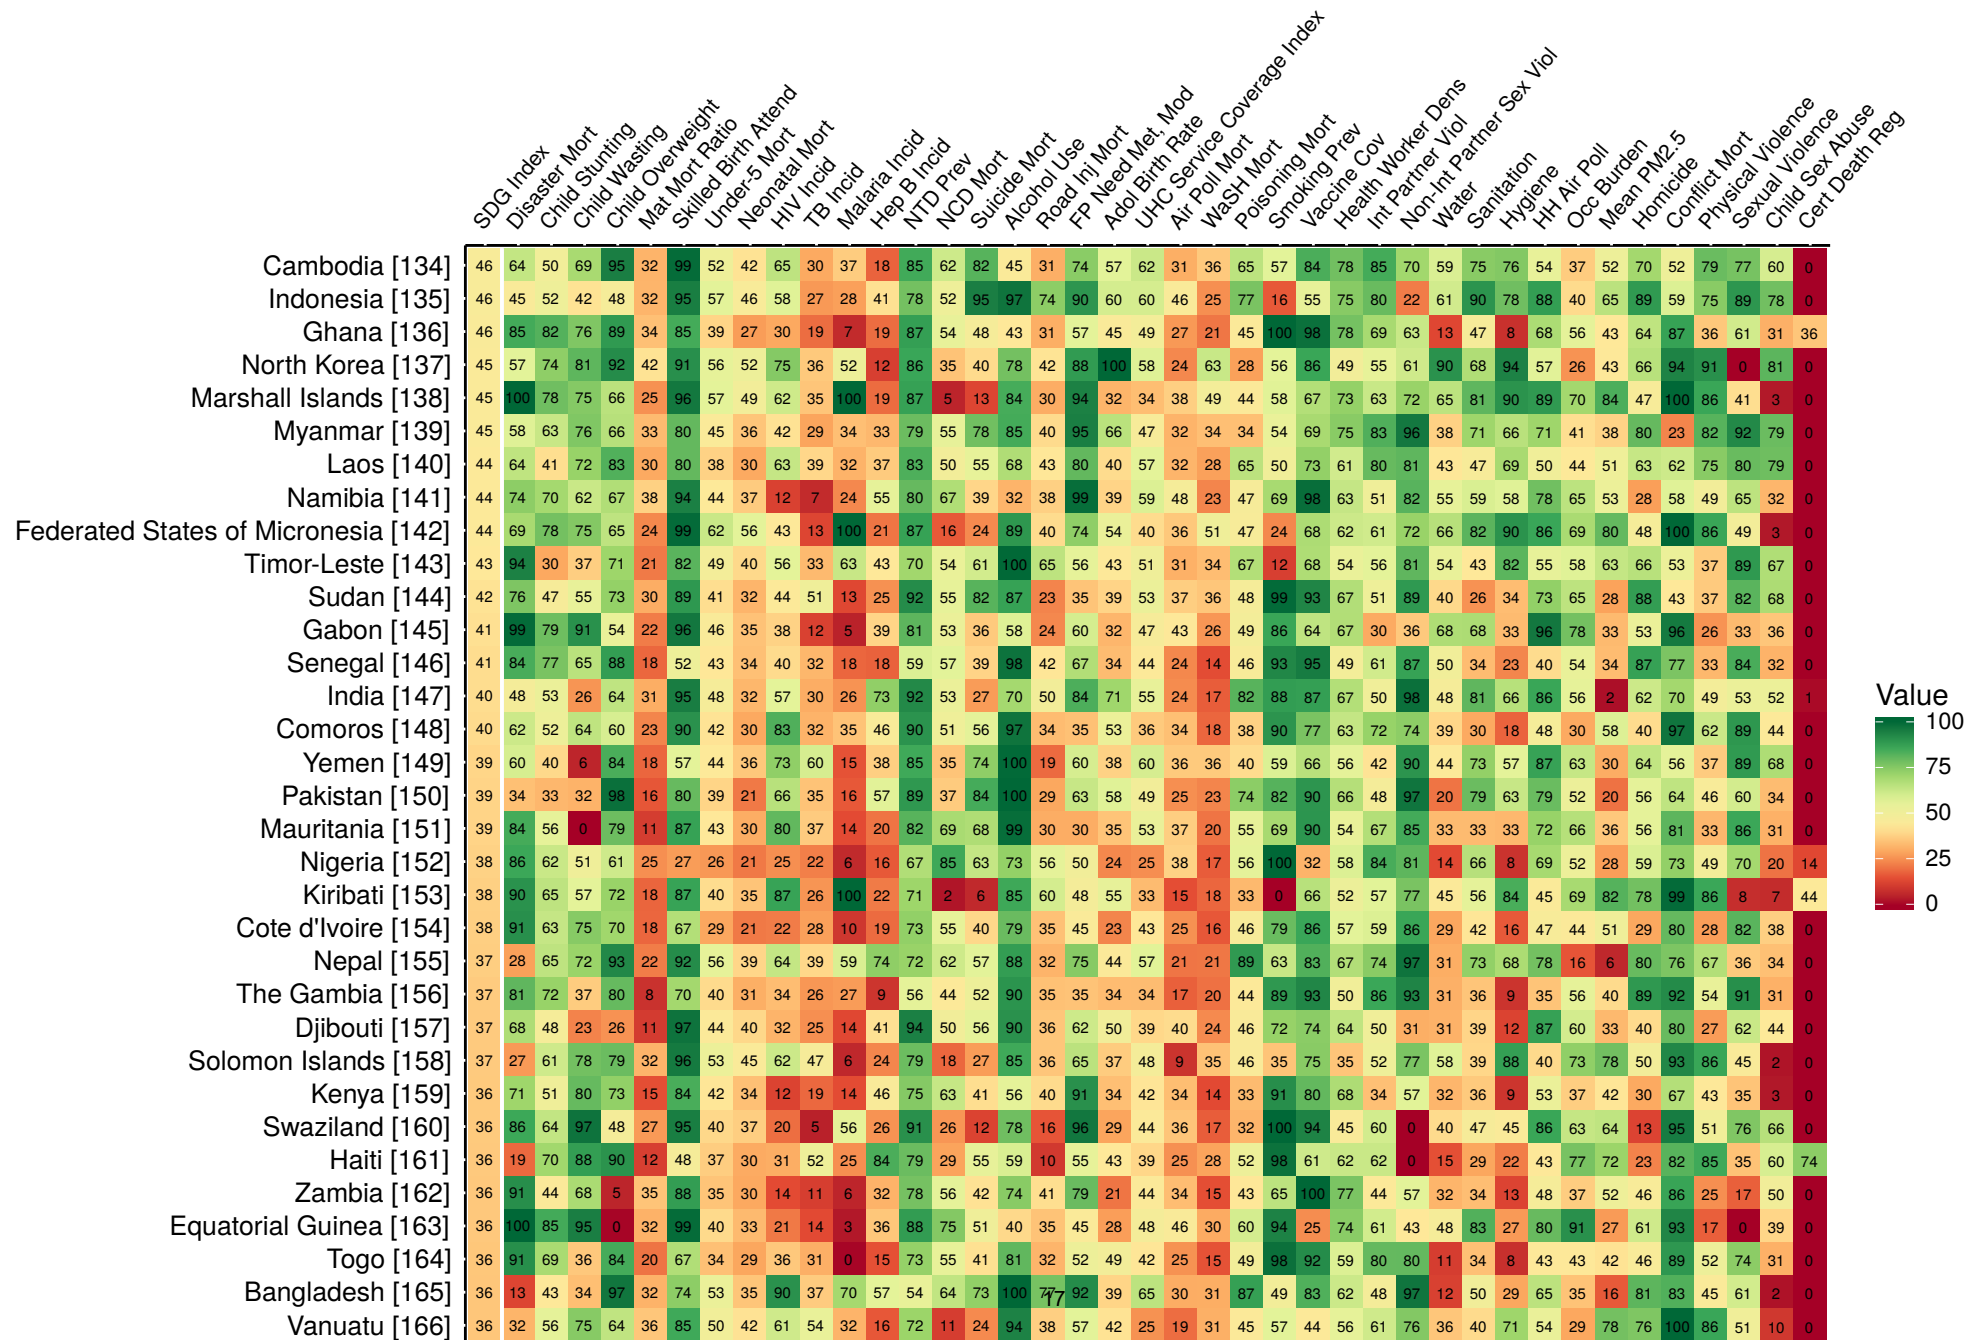

Supplementary figure 3. Projected performance, based on past trends, on the health-related SDG index and 40 individual health-related indicators, by country or territory, 2030

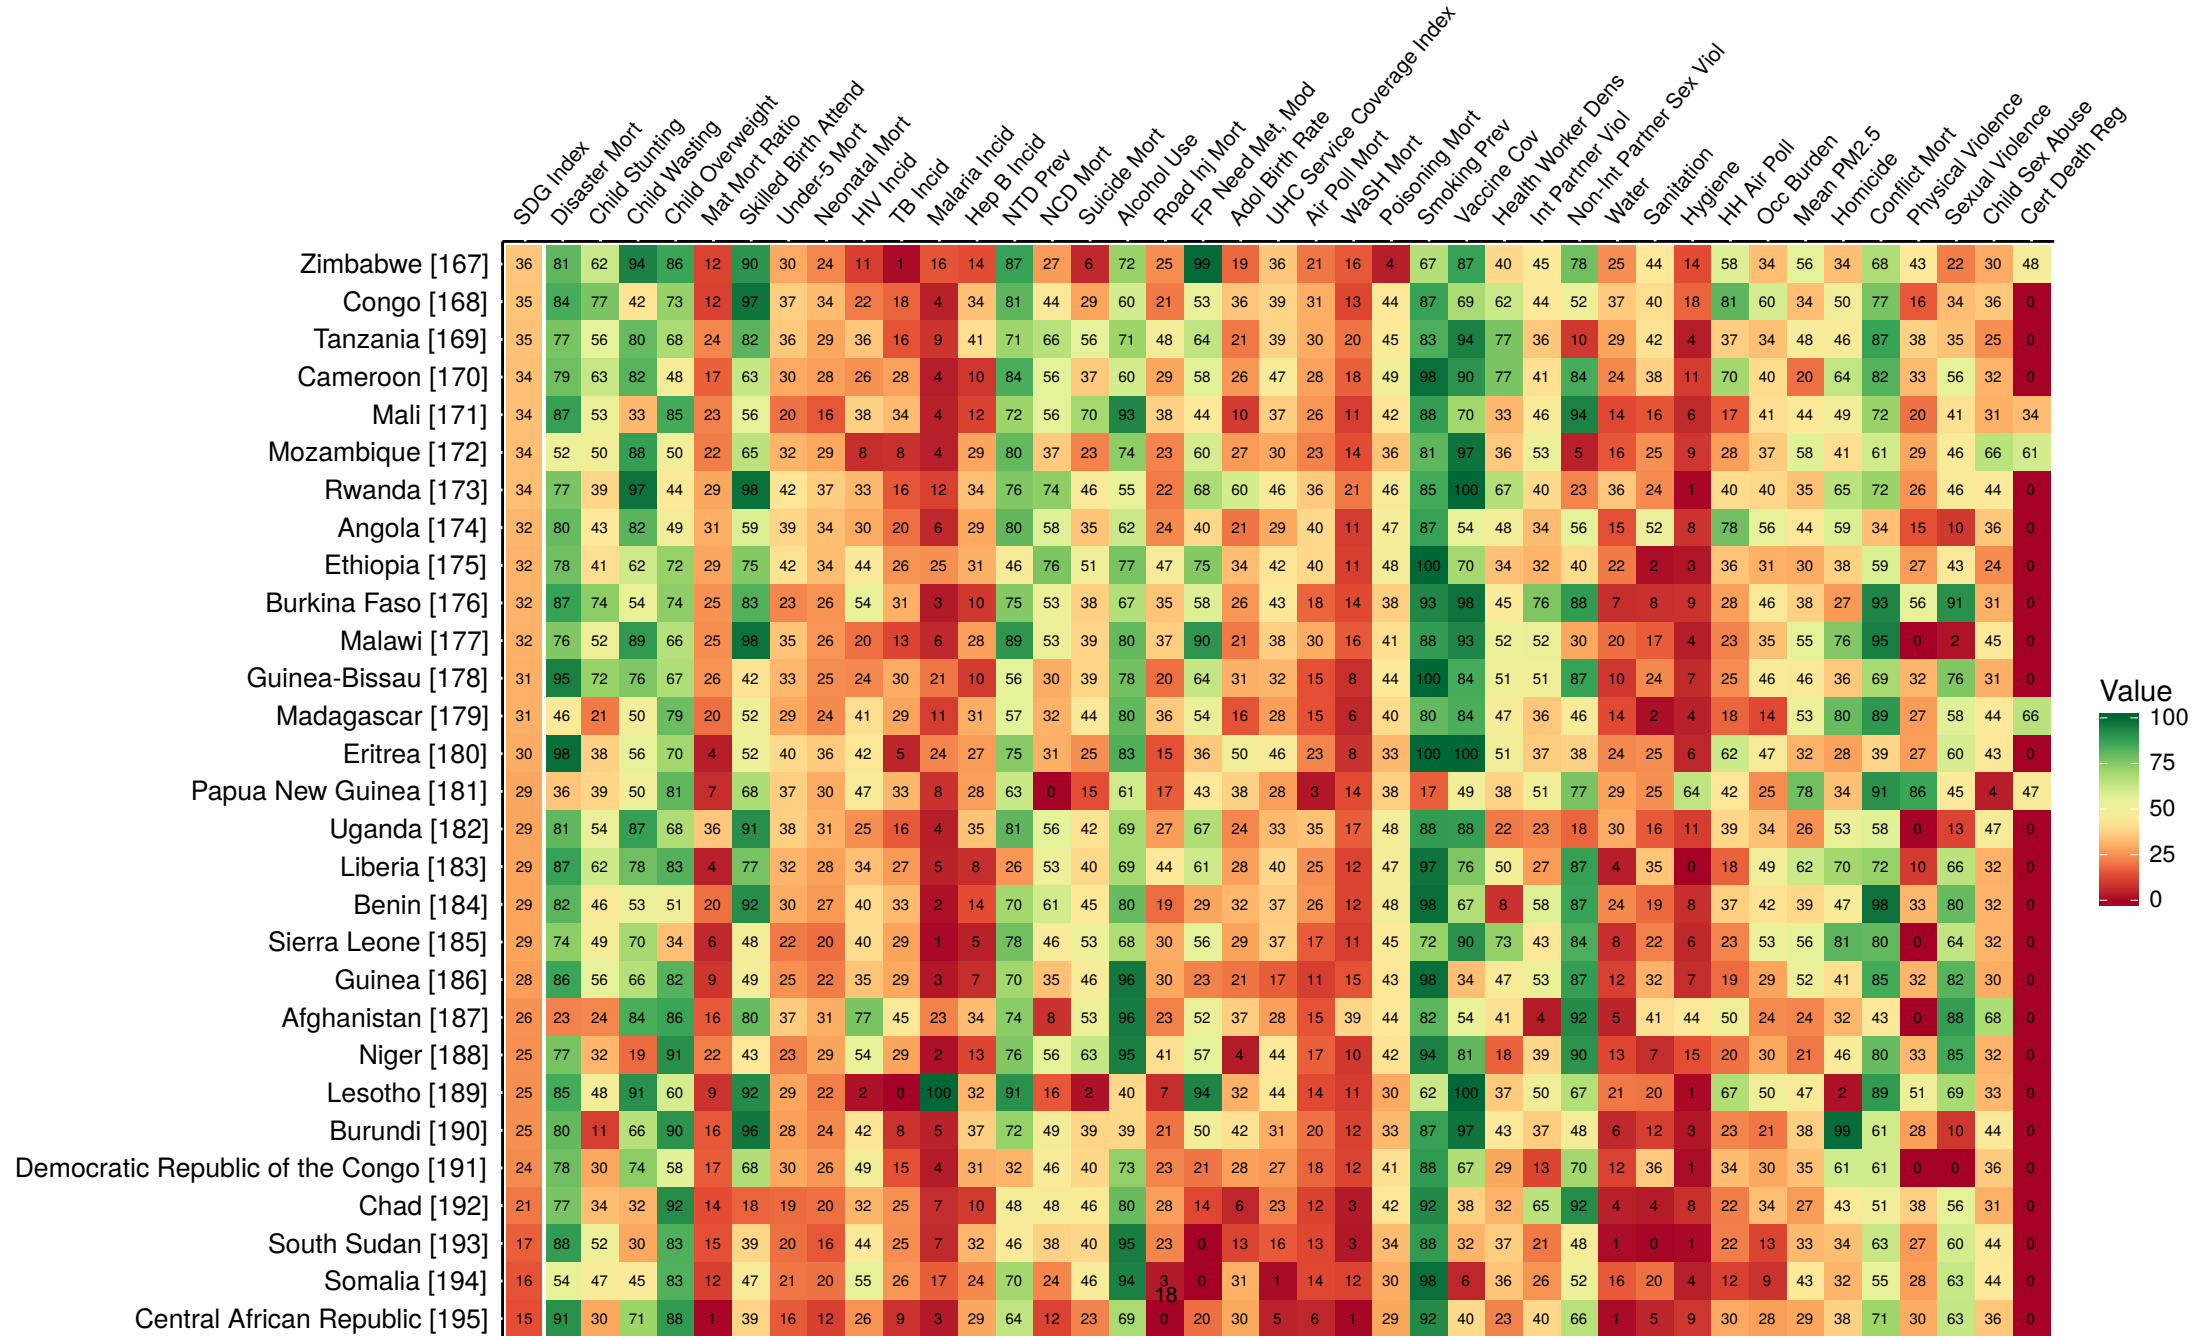

**Supplementary Figure 4. Comparing attainment of defined health-related SDG indicator targets in 2017 and, based on past trends, projected to be attained in 2030, by country.**

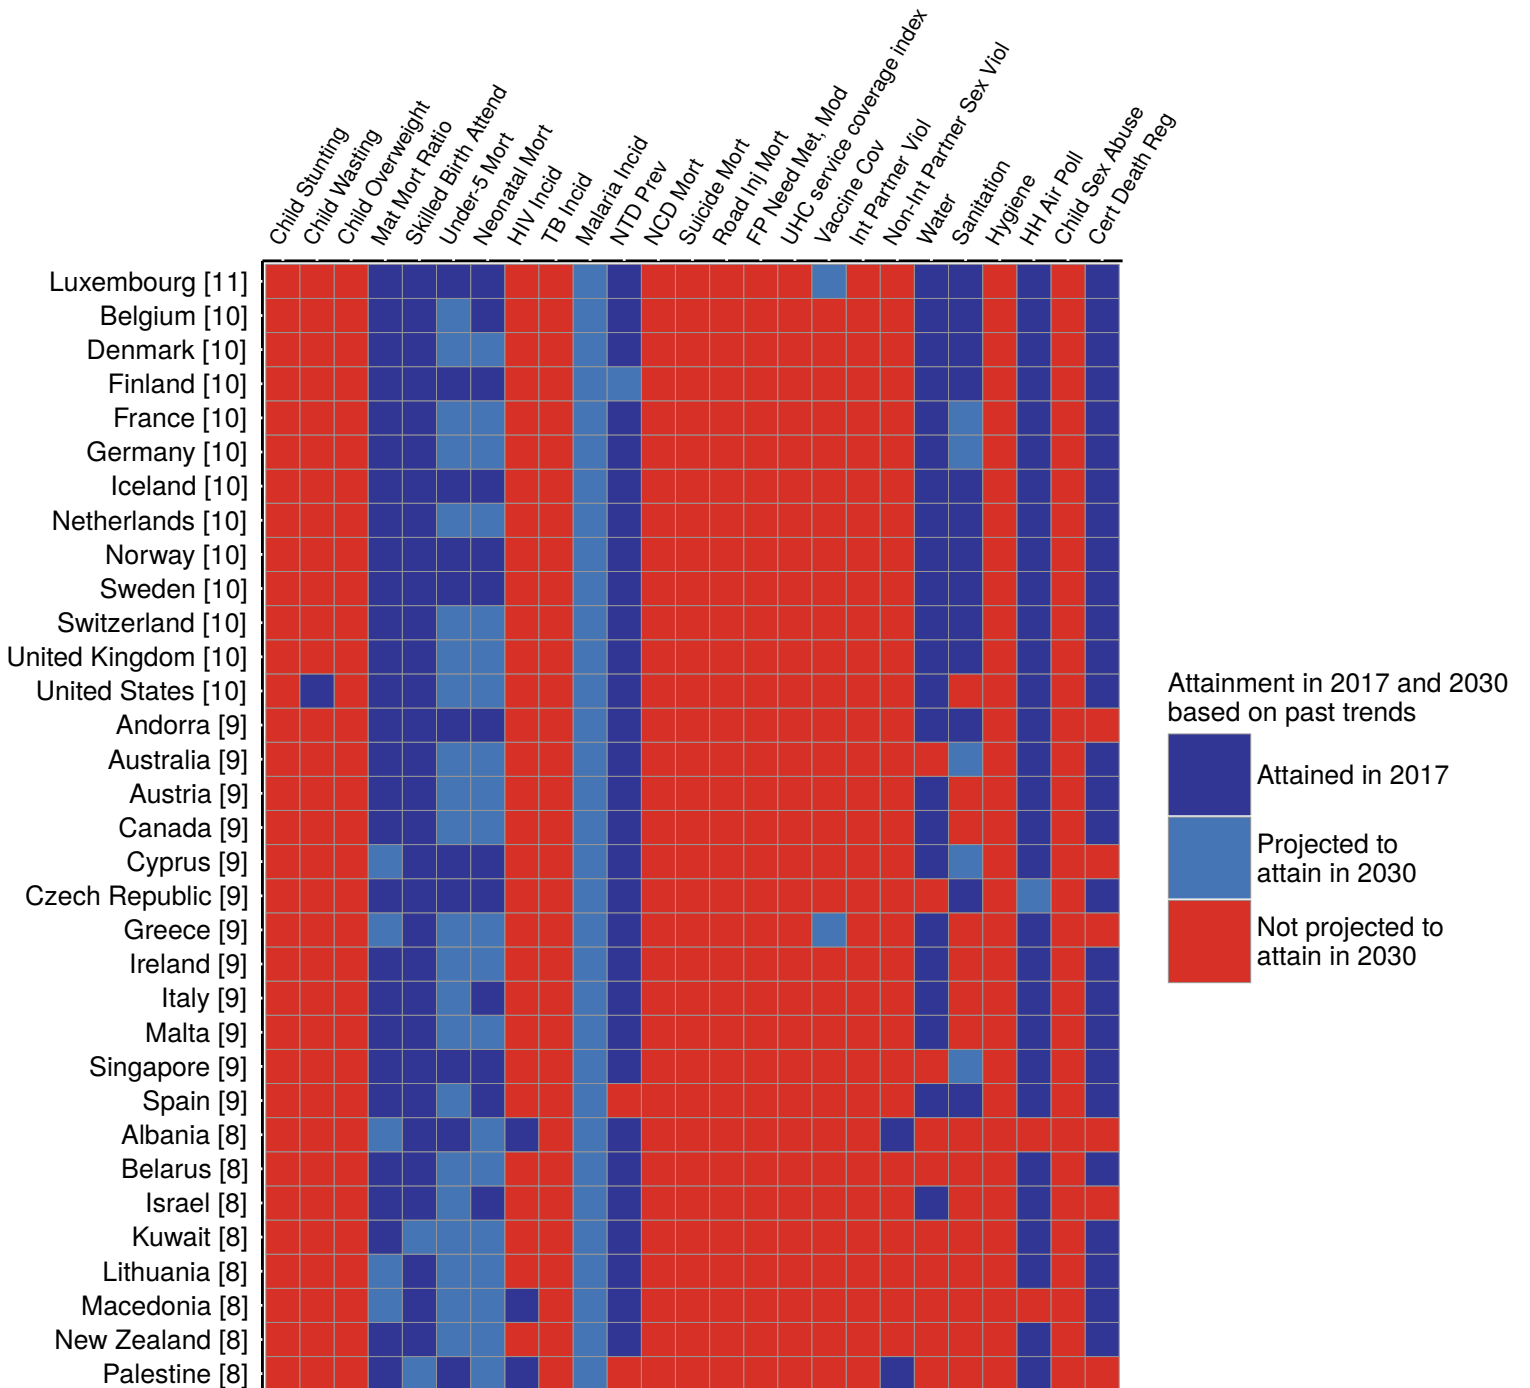



**Supplementary Figure 4. Comparing attainment of defined health-related SDG indicator targets in 2017 and, based on past trends, projected to be attained in 2030, by country.**

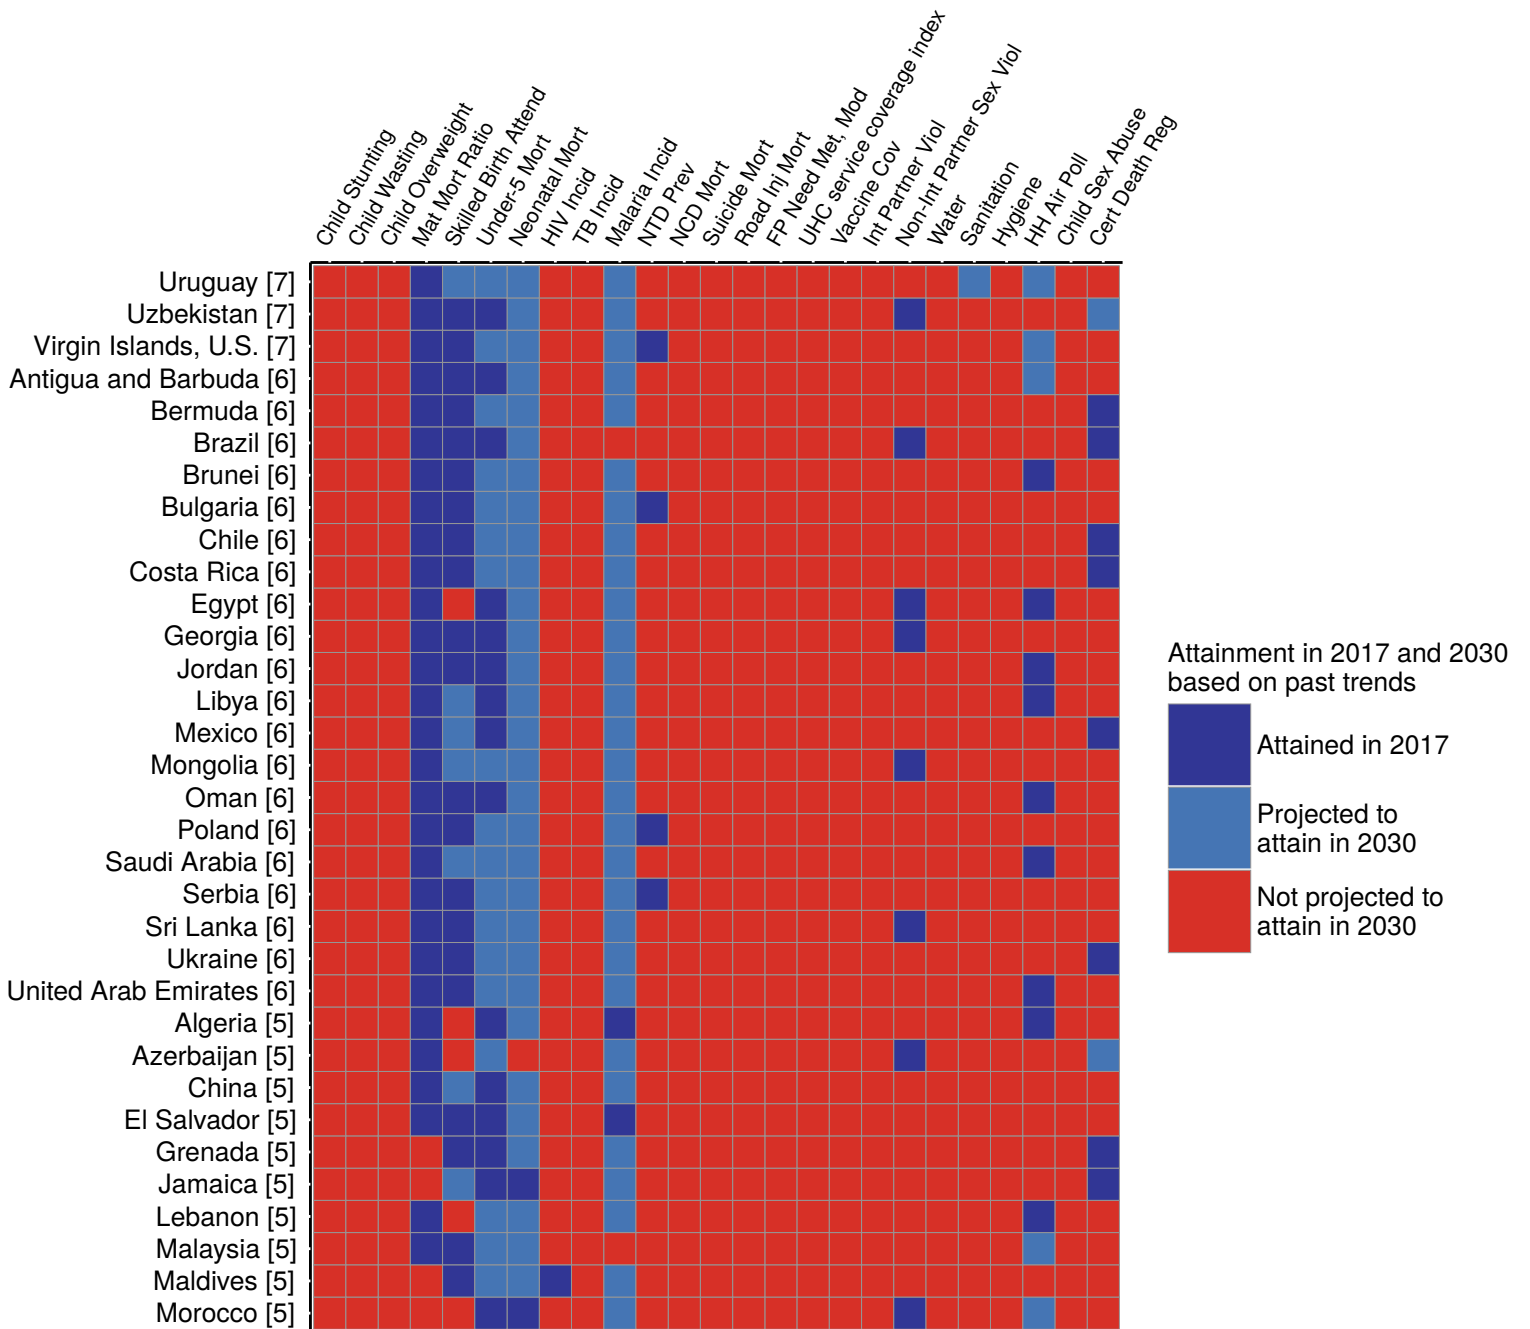

**Supplementary Figure 4. Comparing attainment of defined health-related SDG indicator targets in 2017 and, based on past trends, projected to be attained in 2030, by country.**

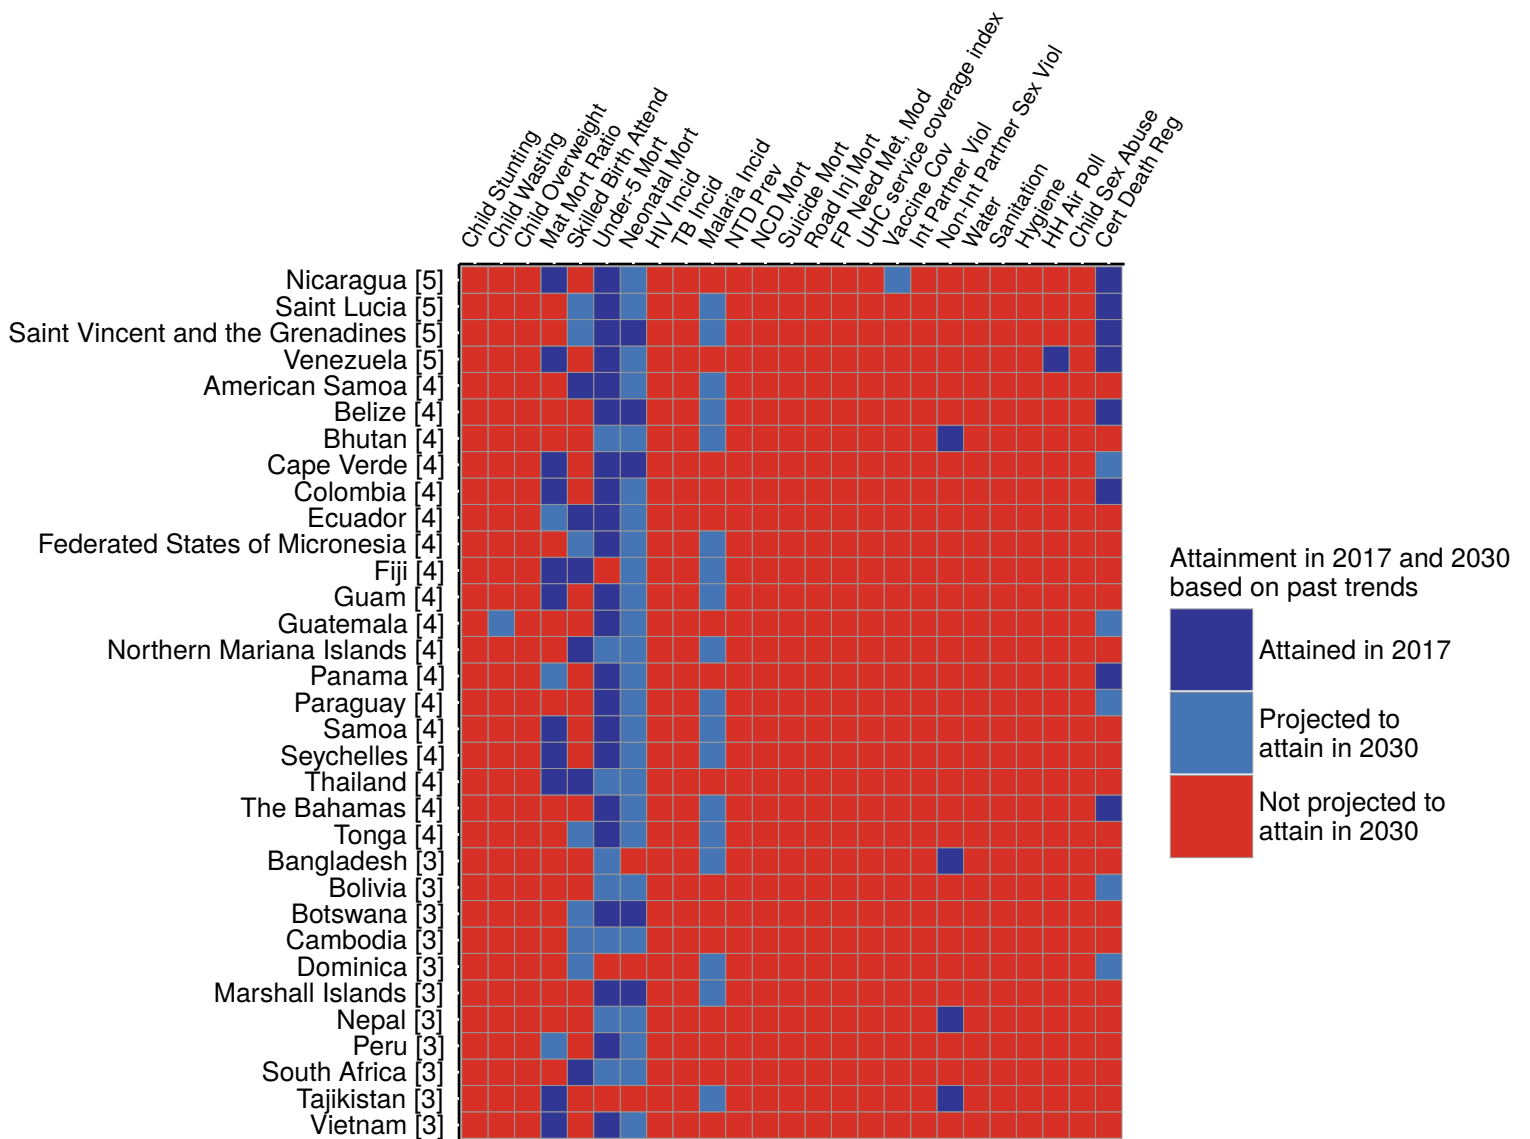



**Supplementary Figure 4. Comparing attainment of defined health-related SDG indicator targets in 2017 and, based on past trends, projected to be attained in 2030, by country.**

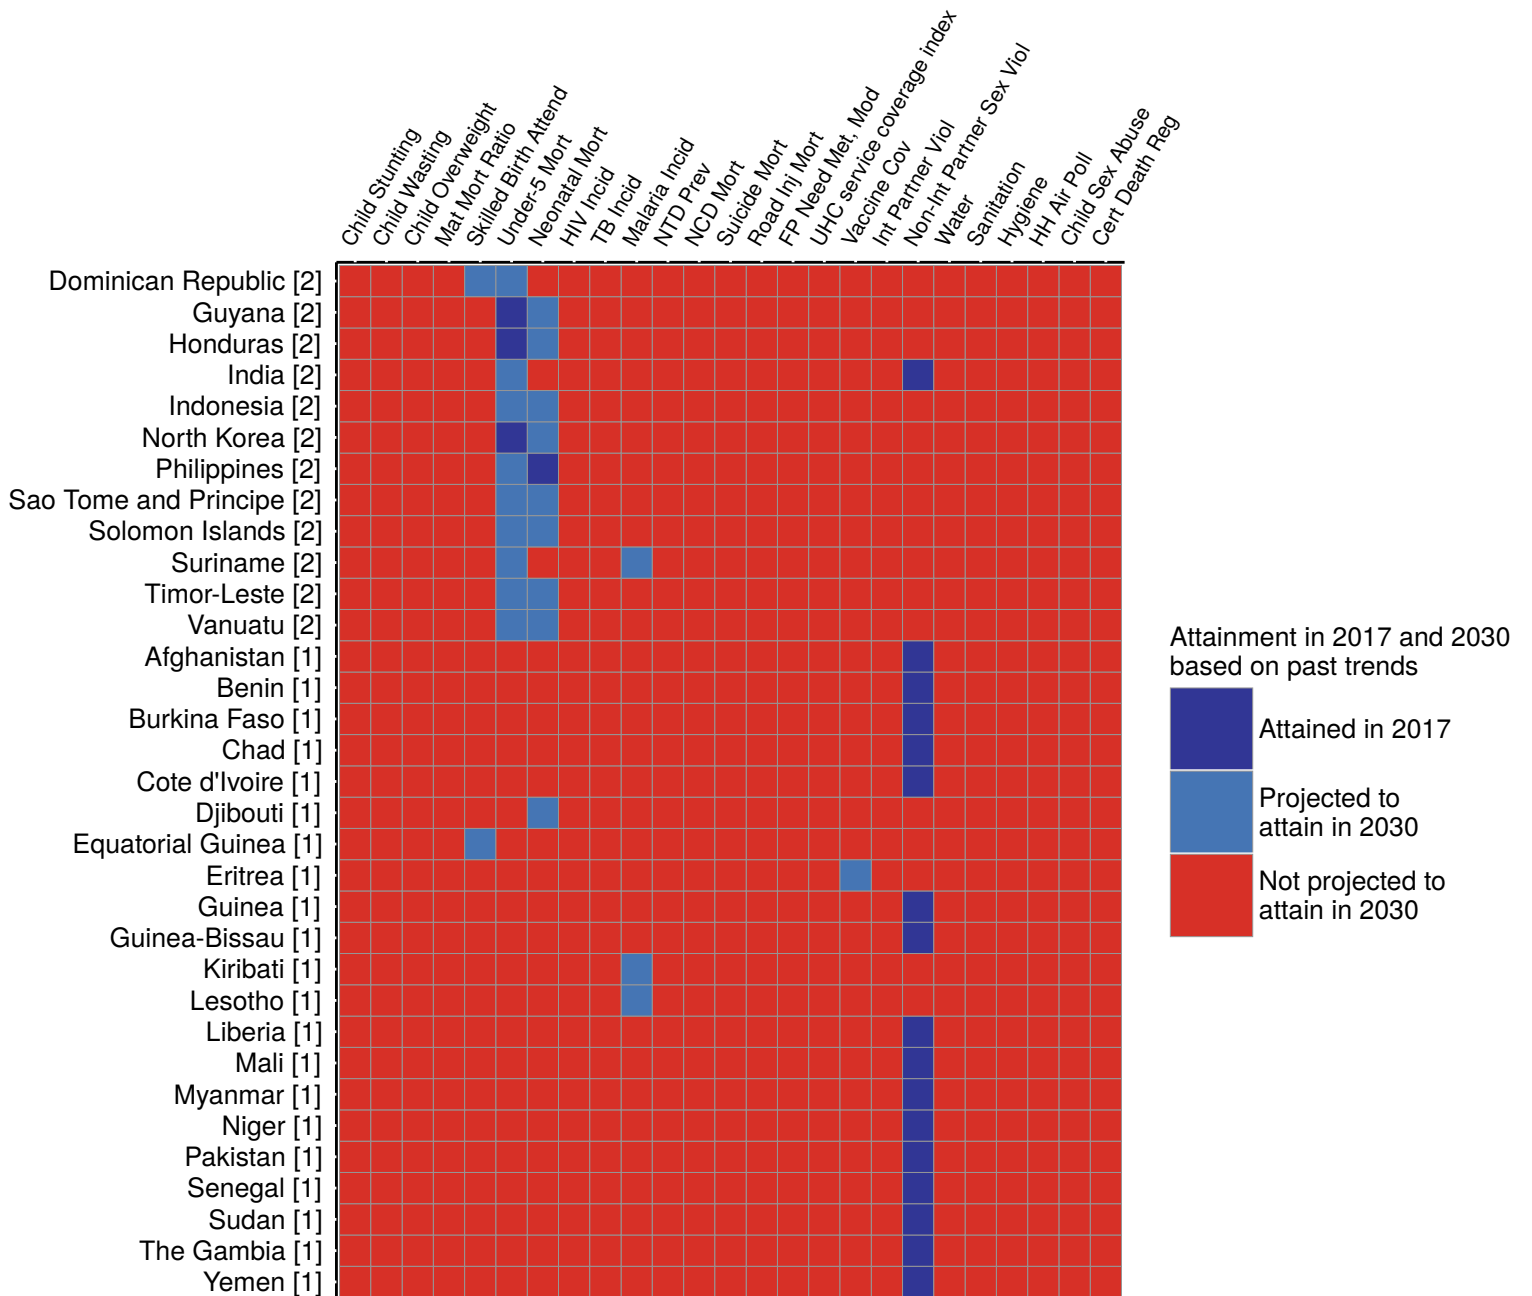



**Supplementary Figure 4. Comparing attainment of defined health-related SDG indicator targets in 2017 and, based on past trends, projected to be attained in 2030, by country.**

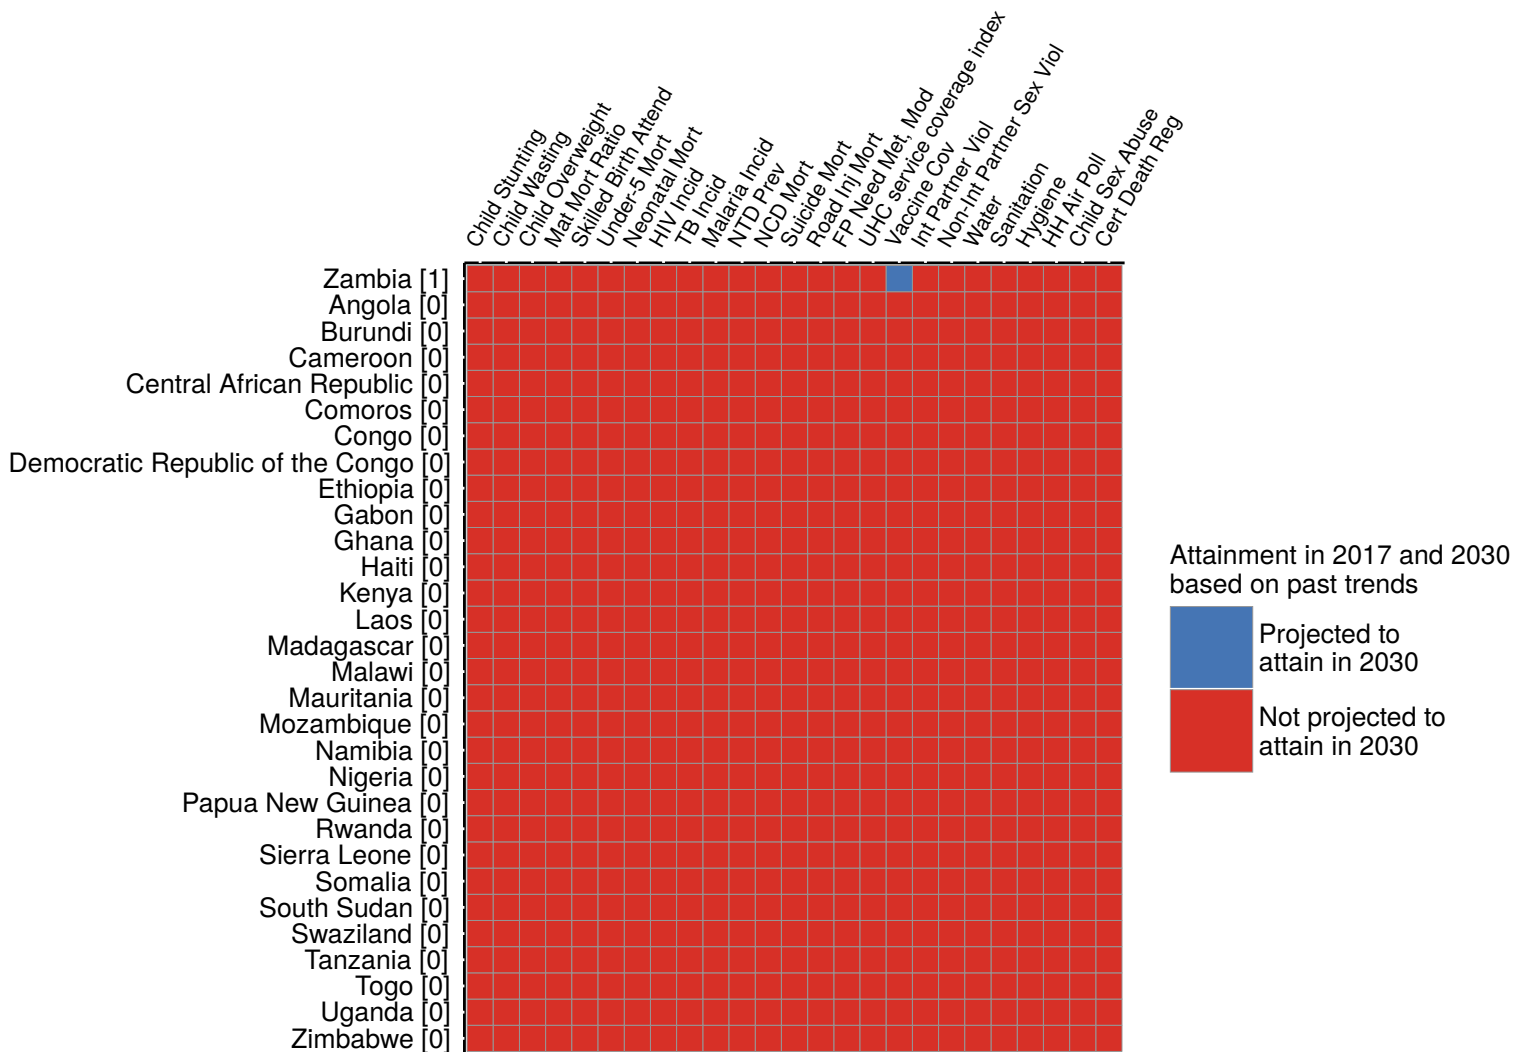

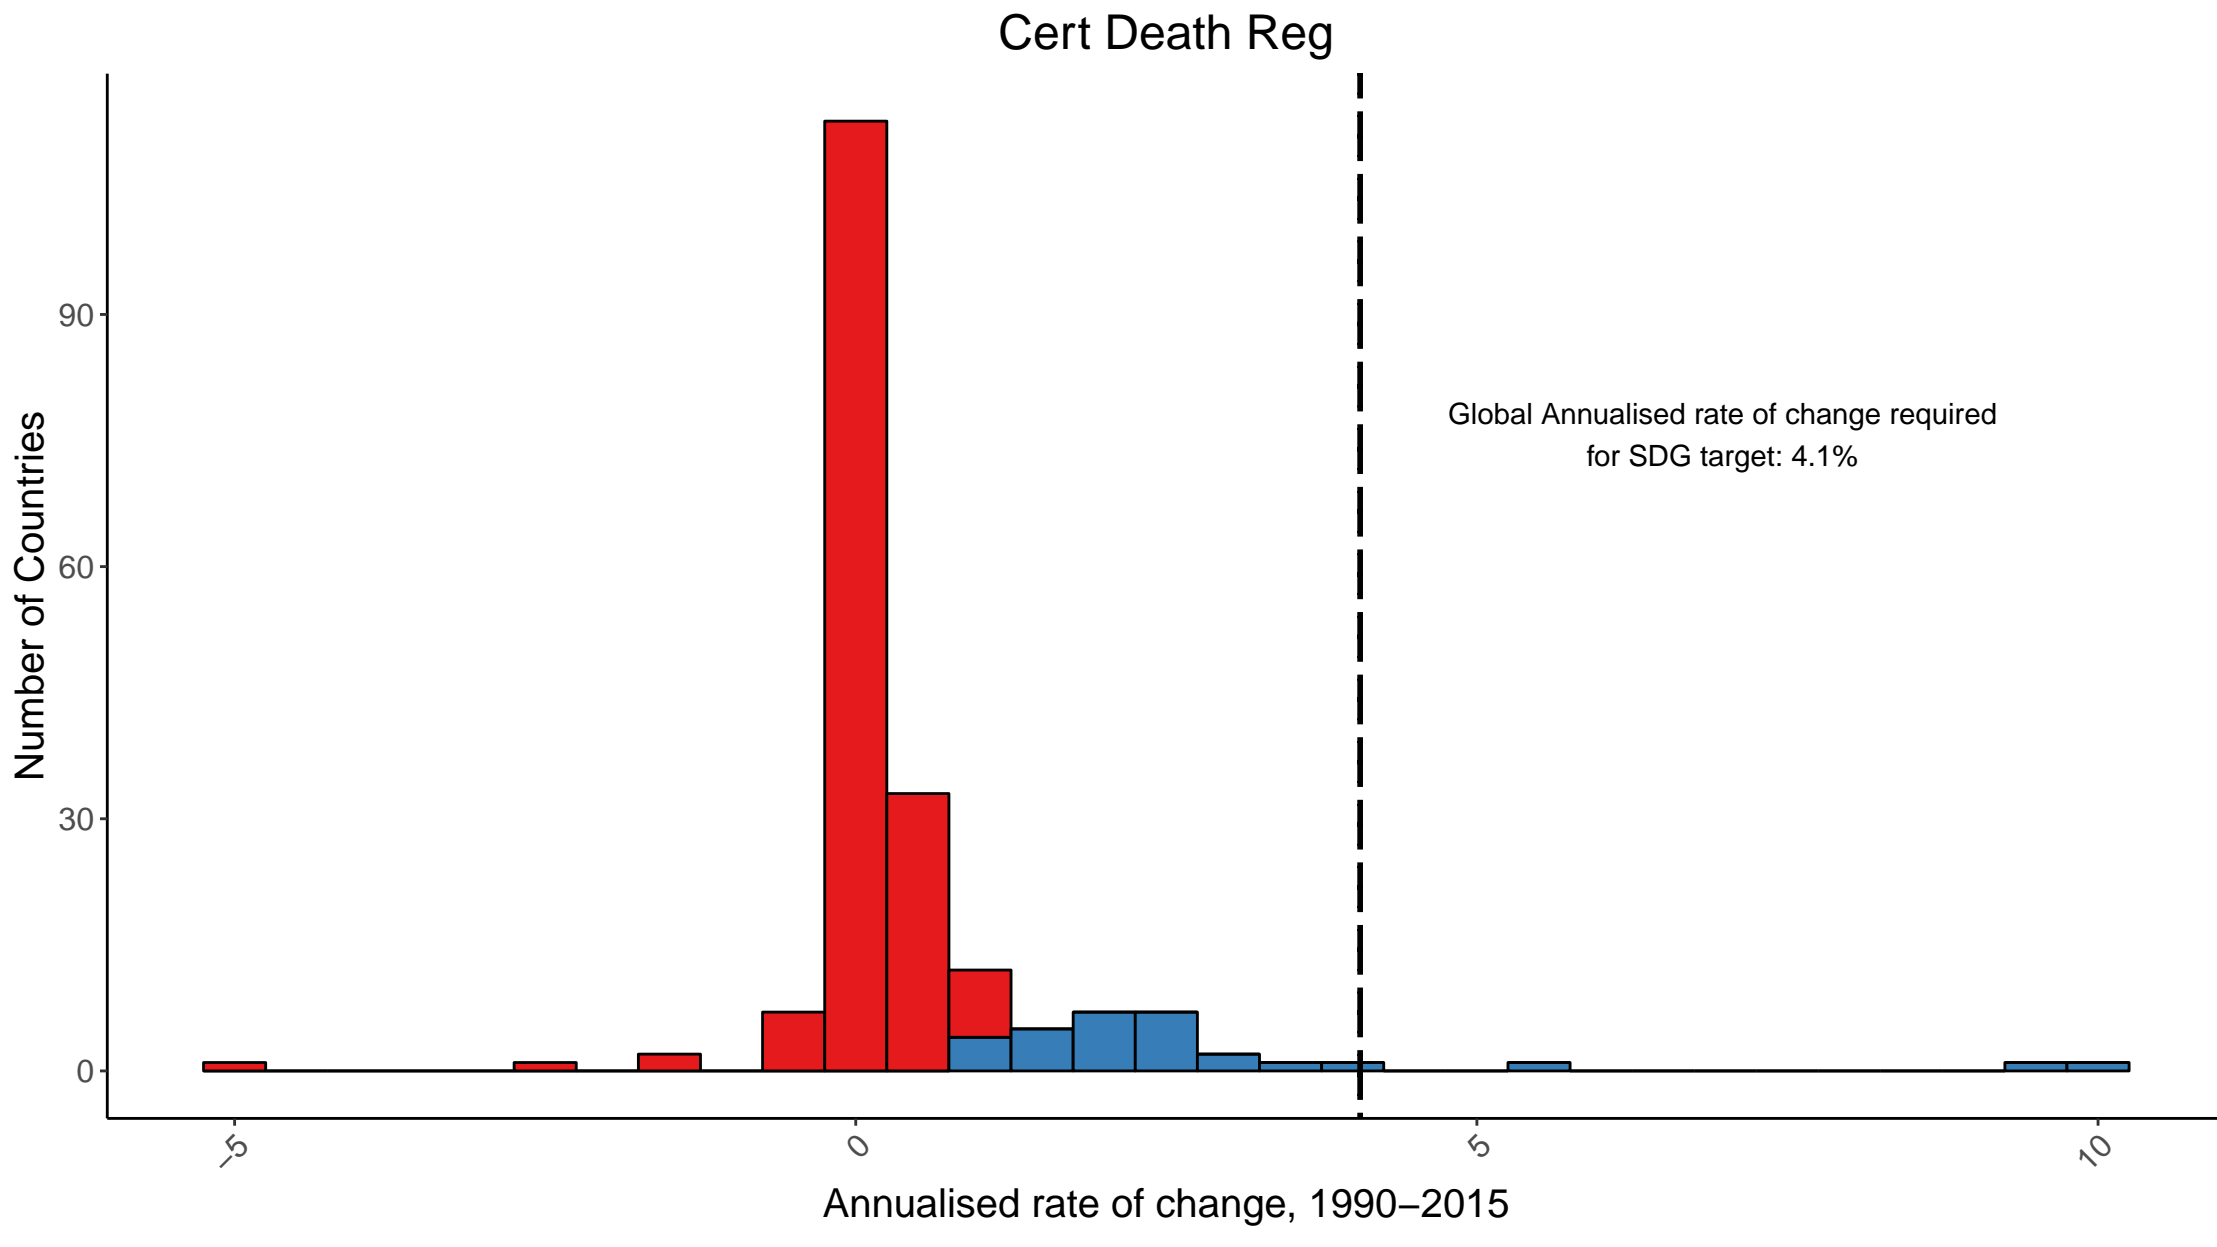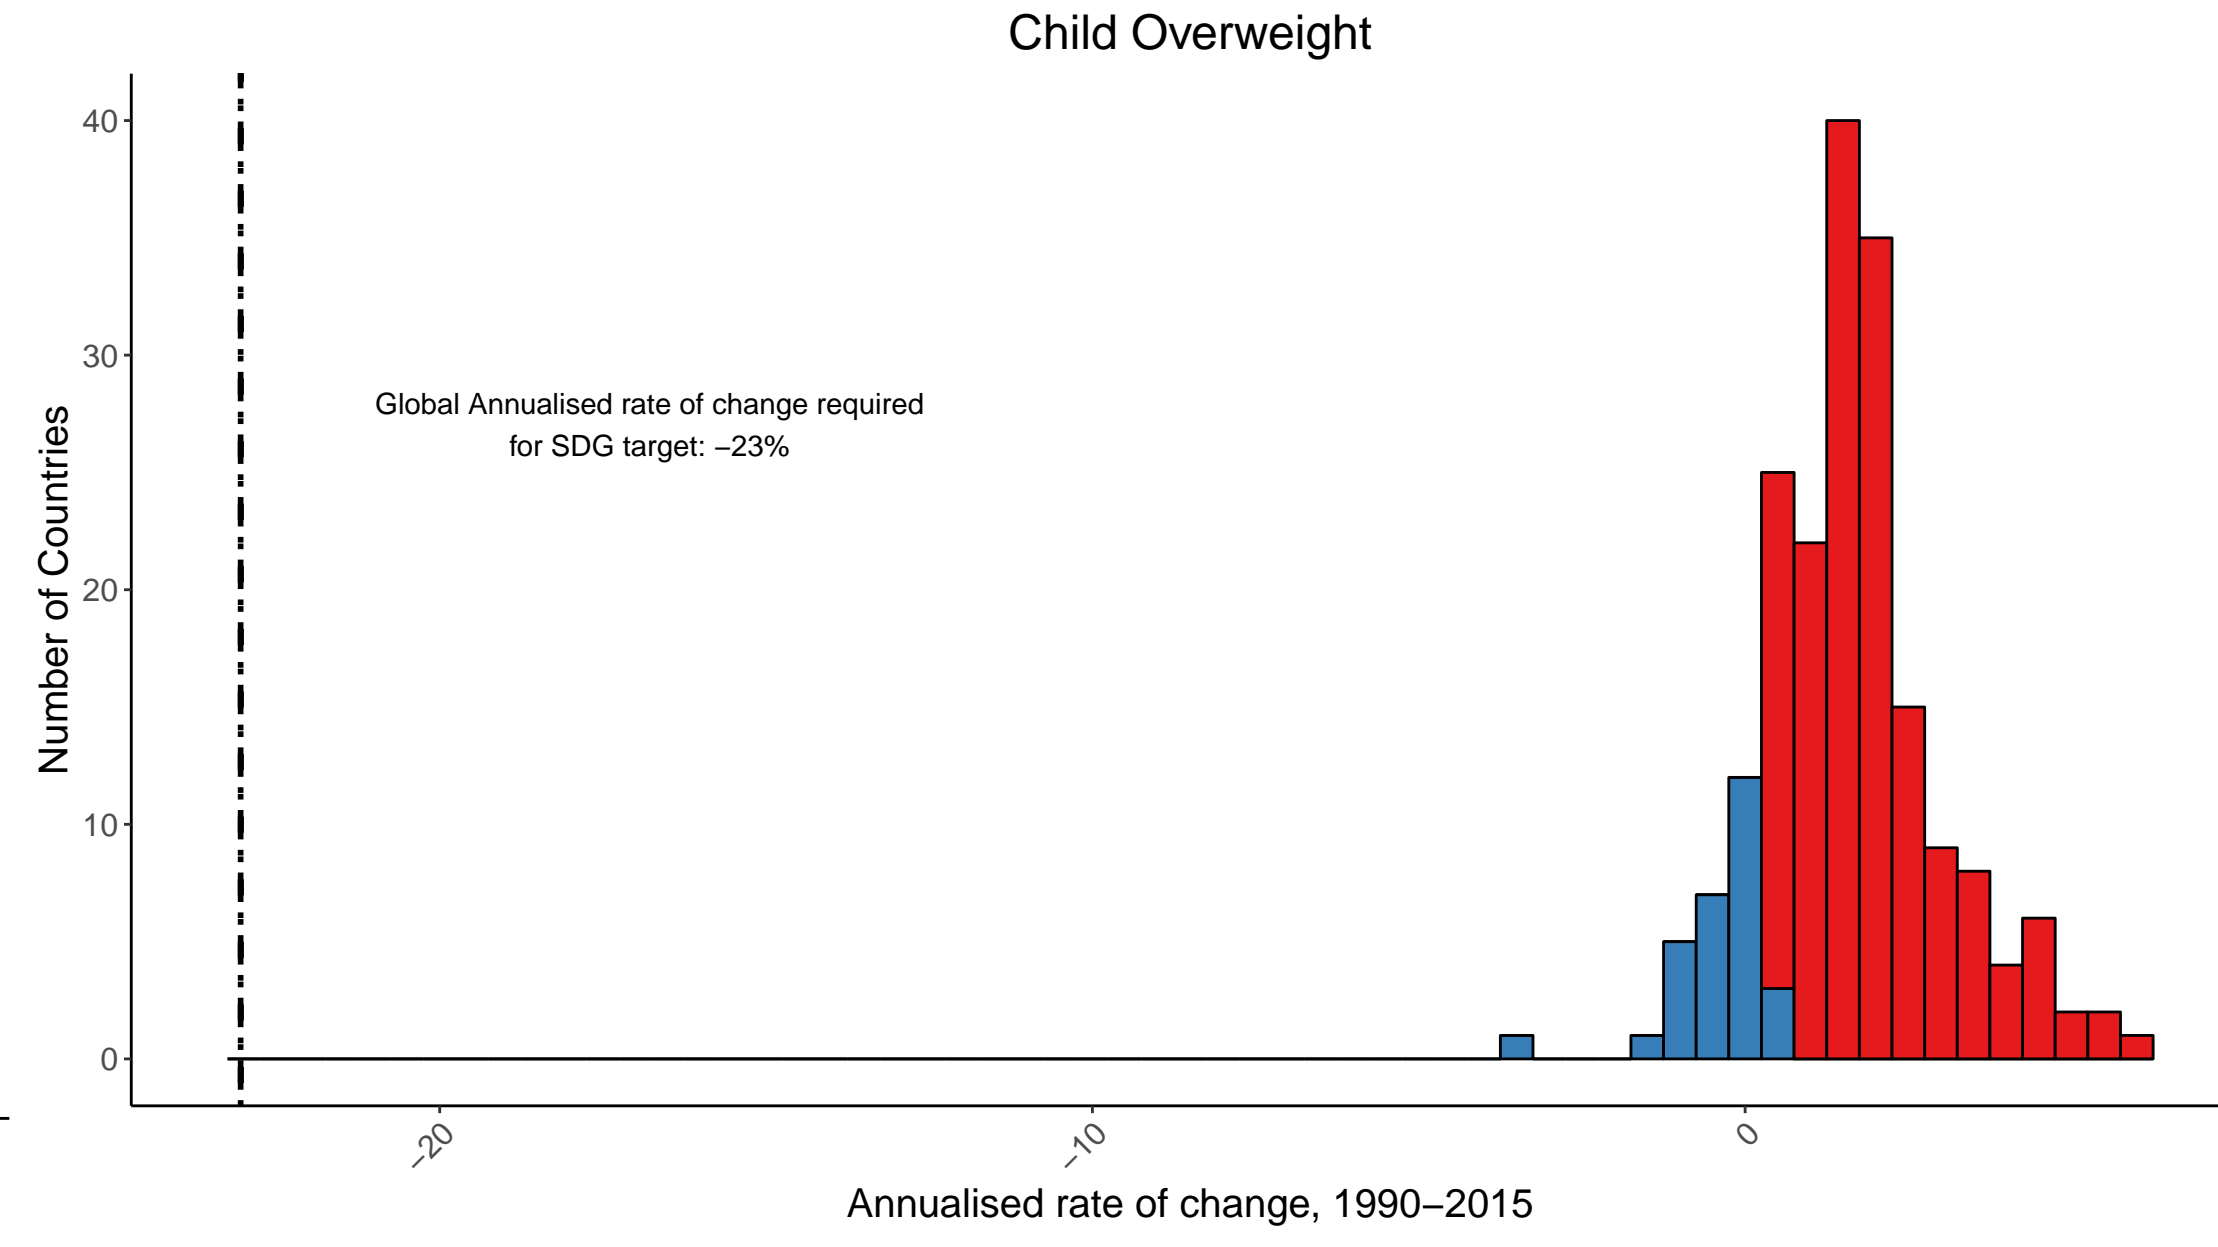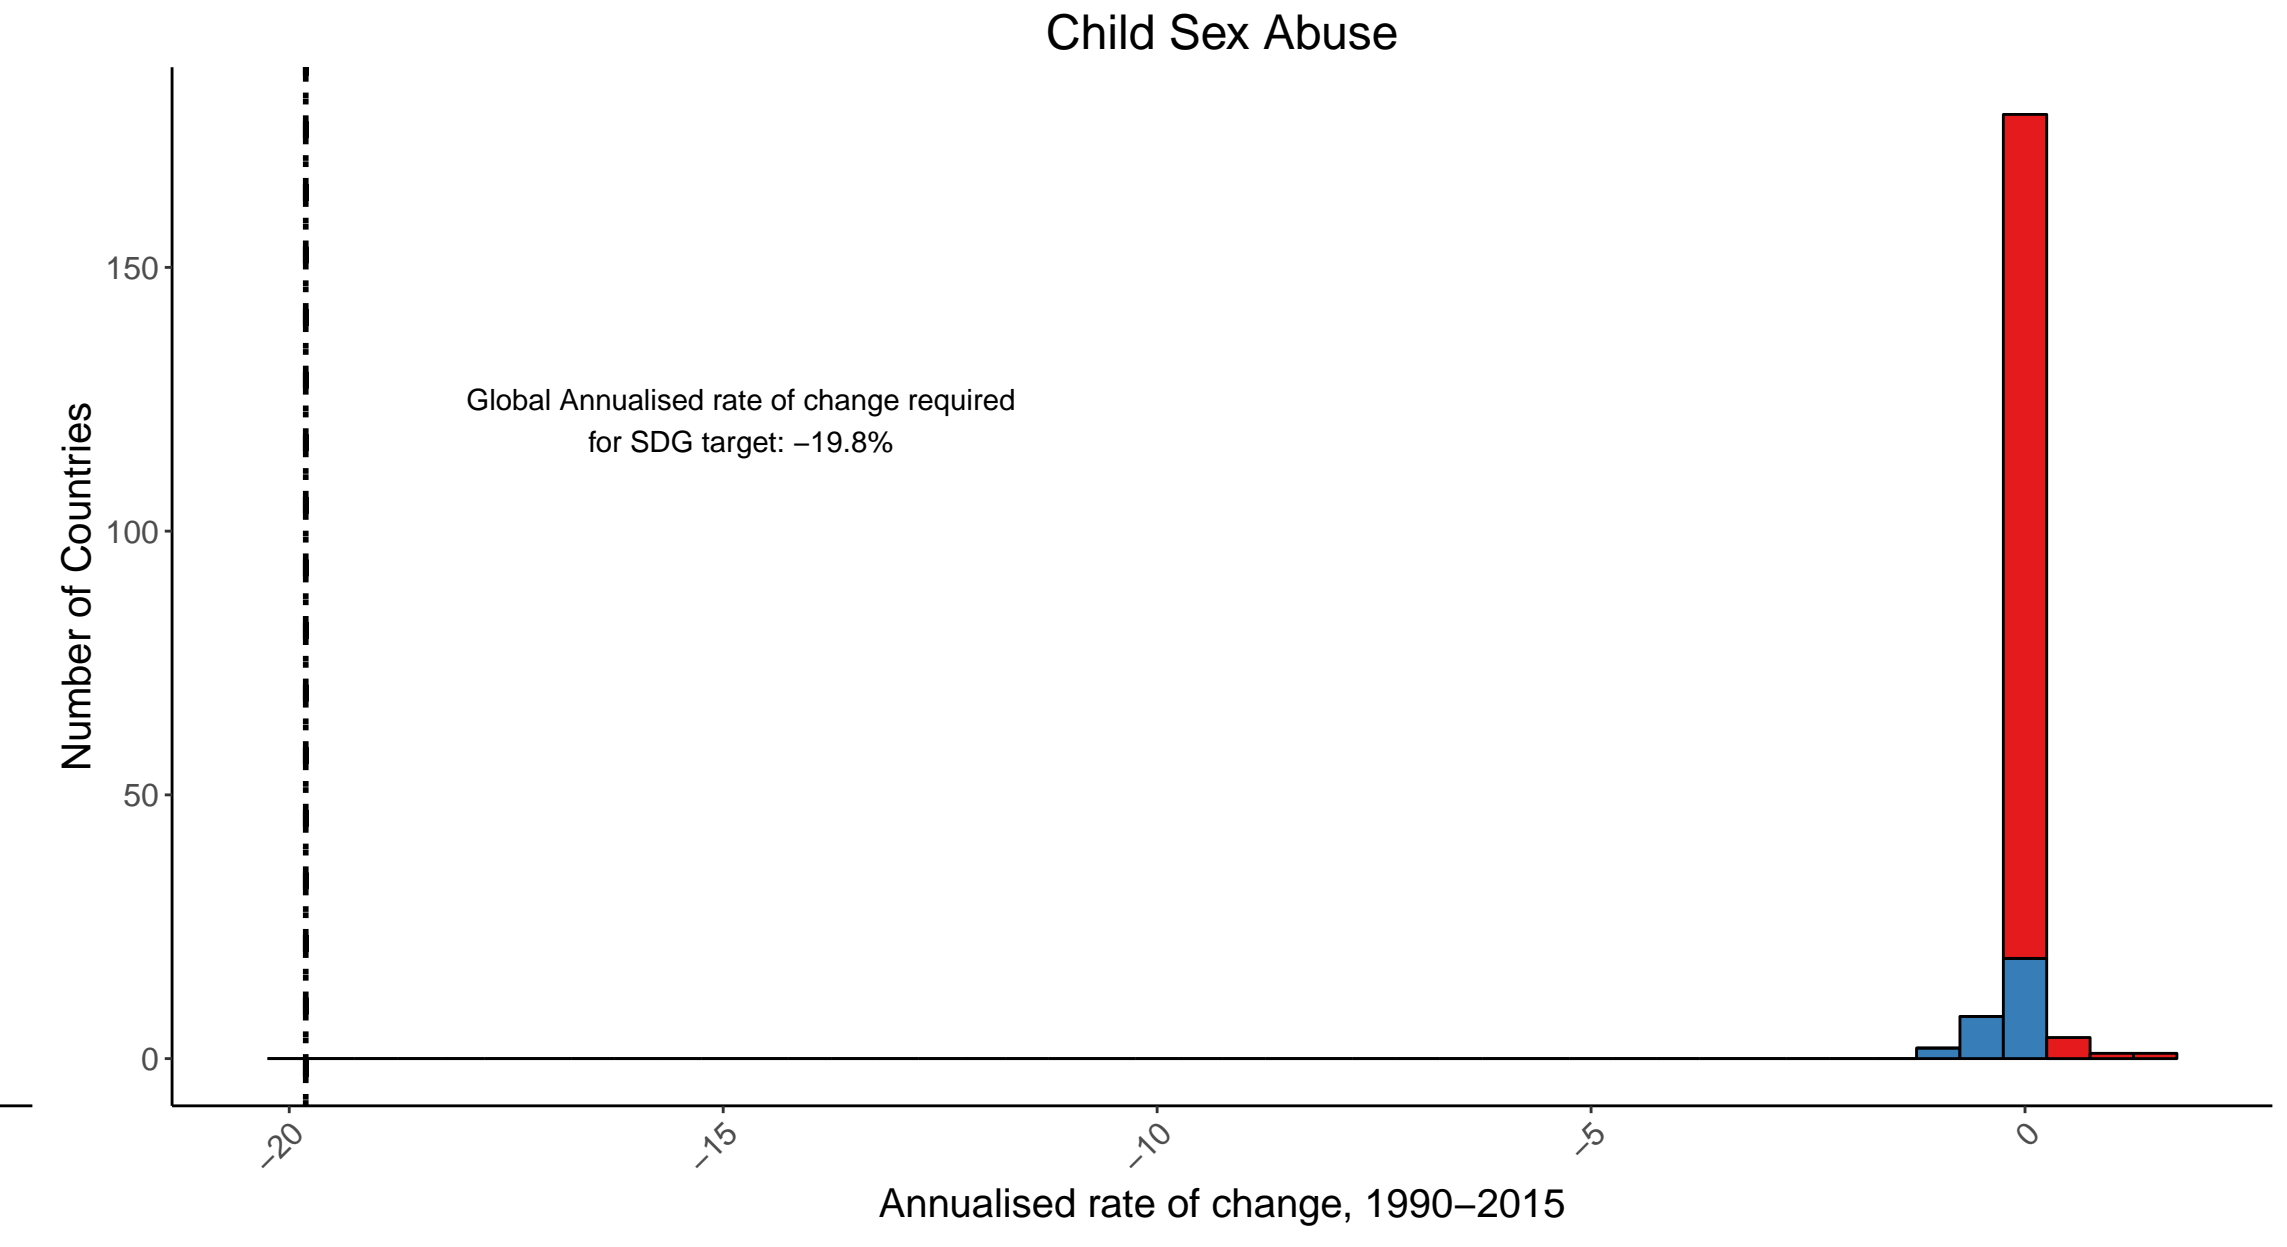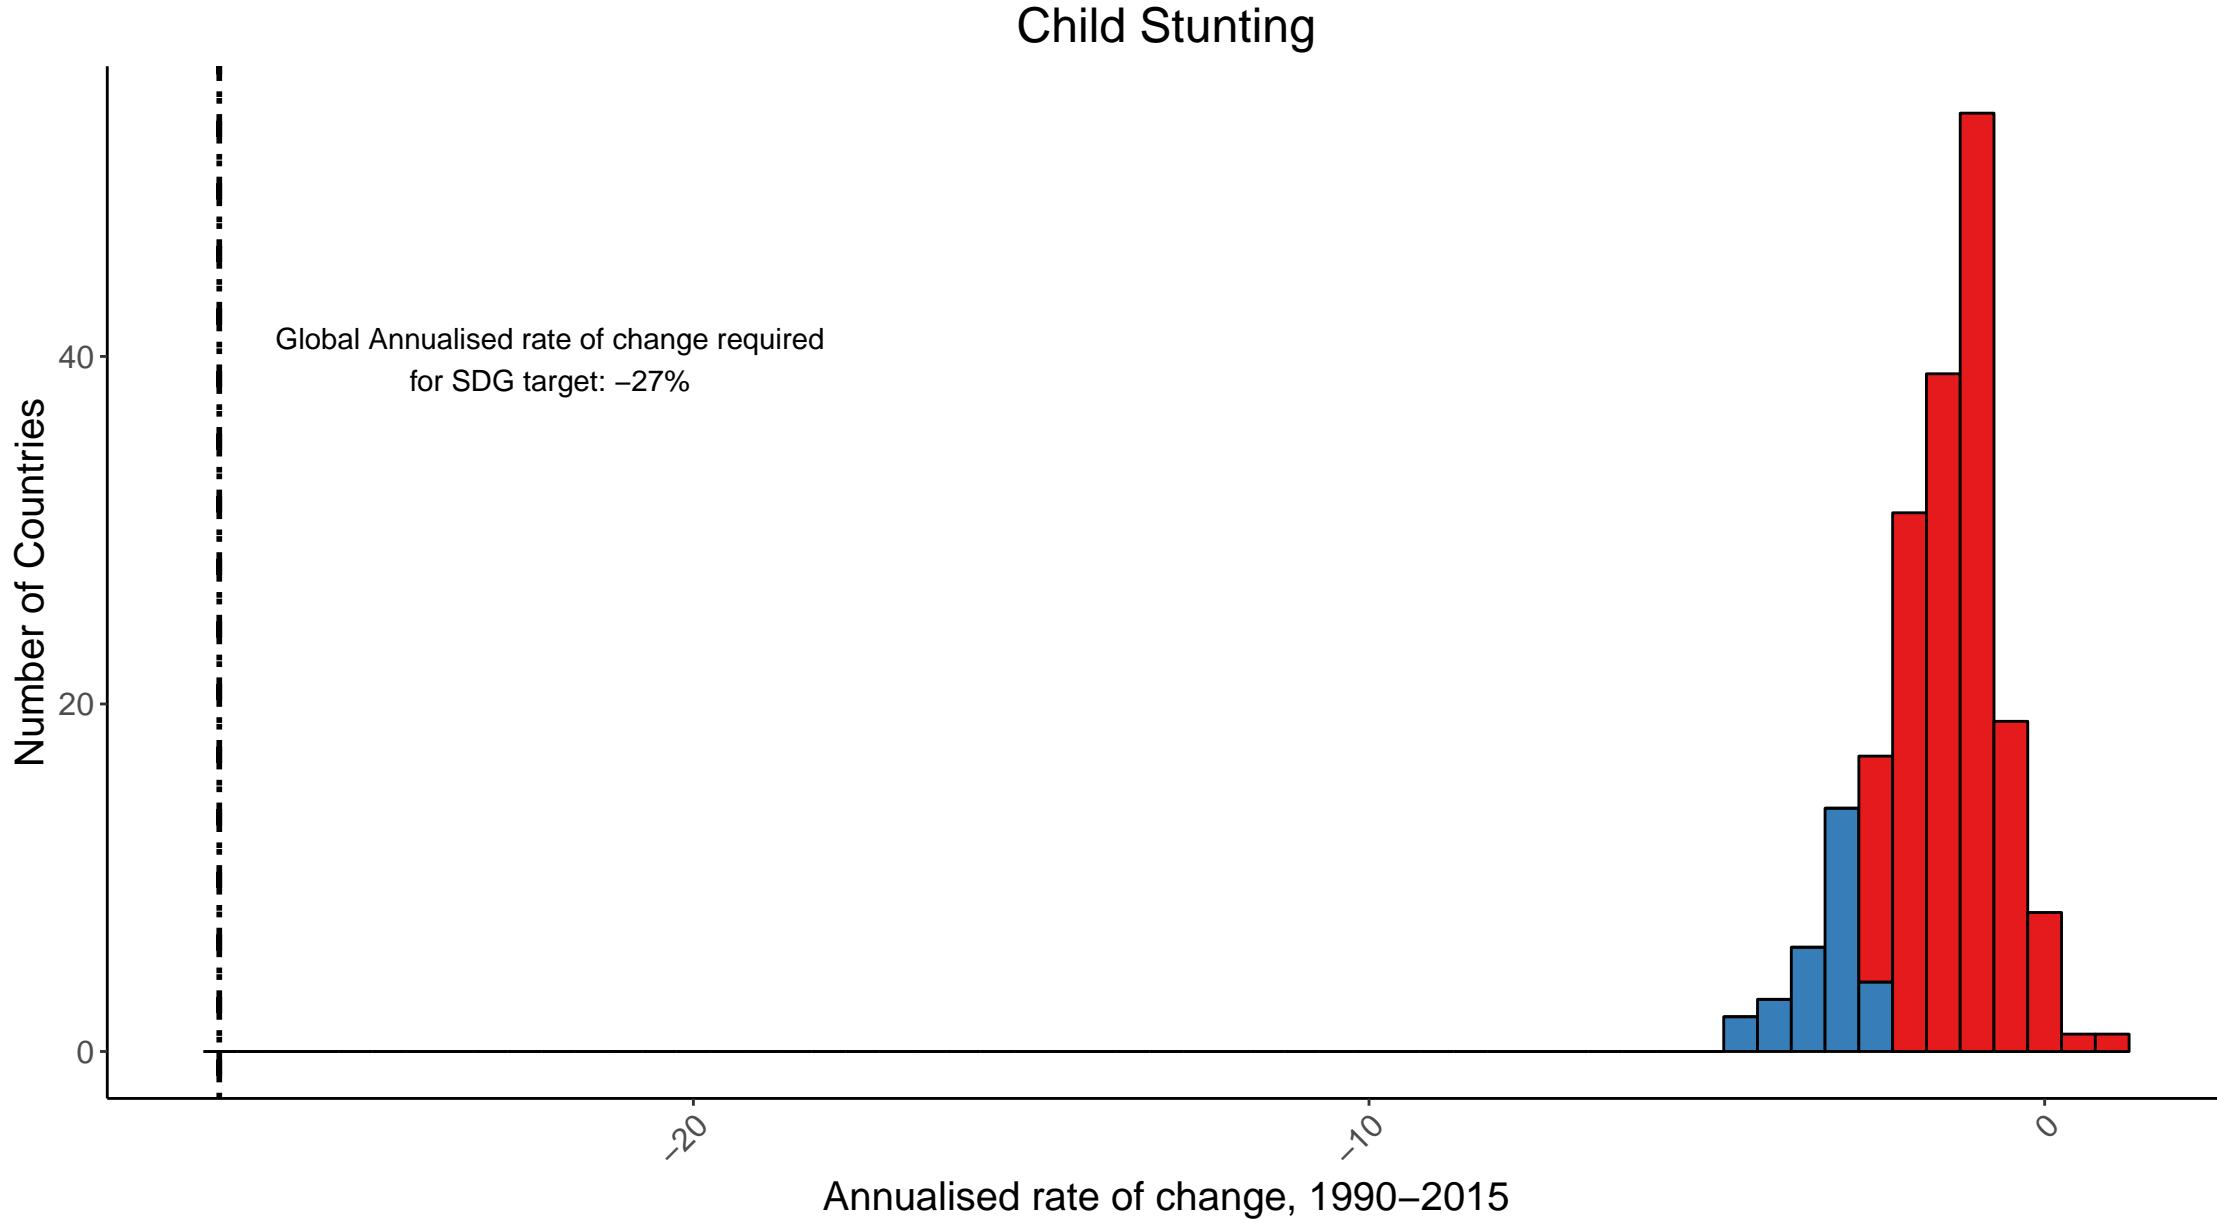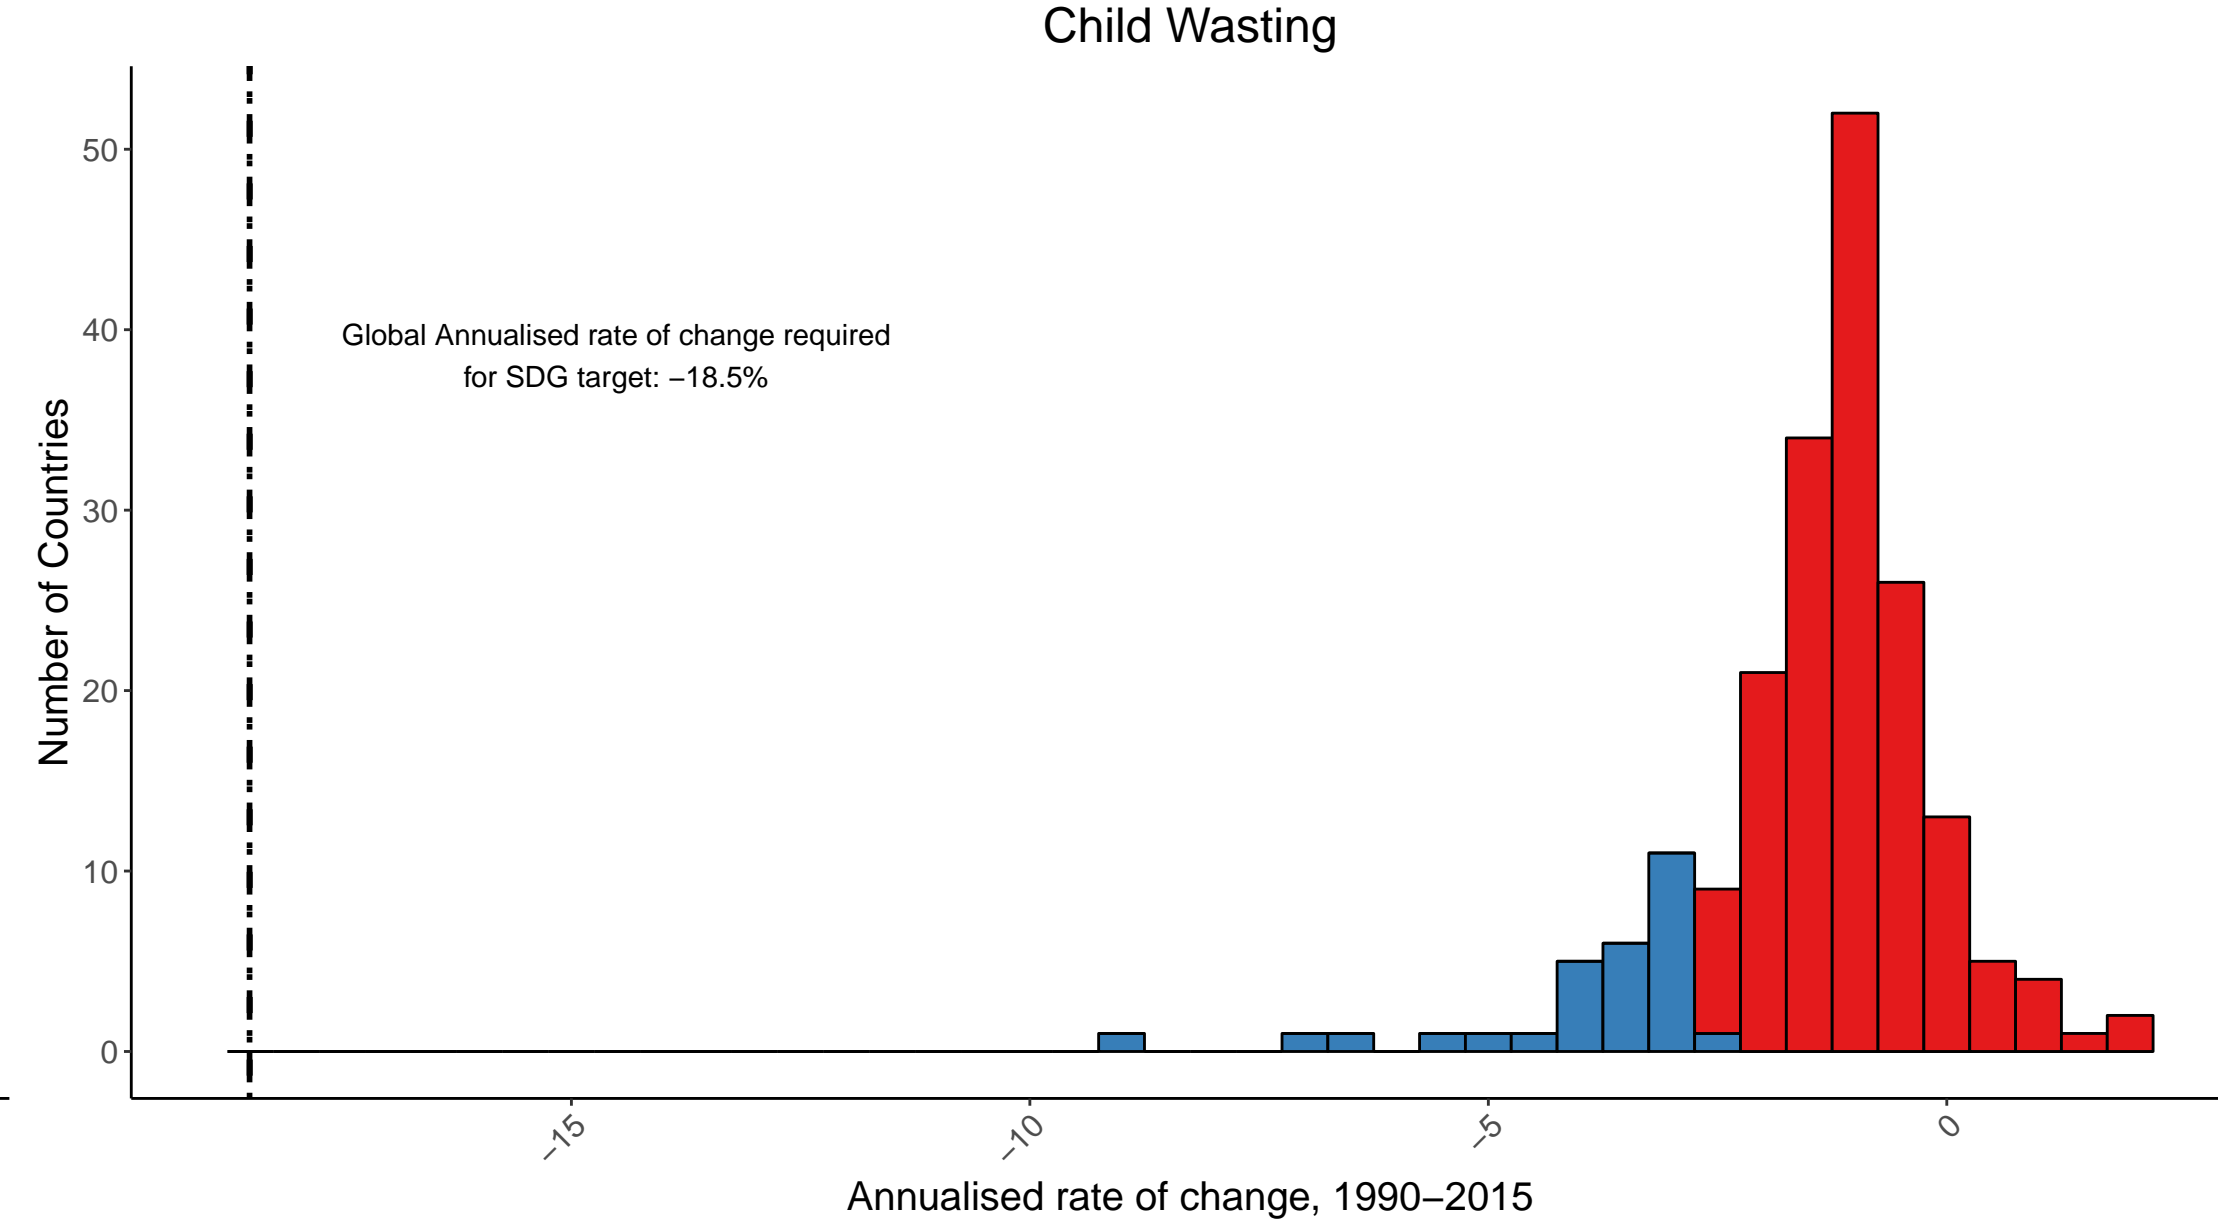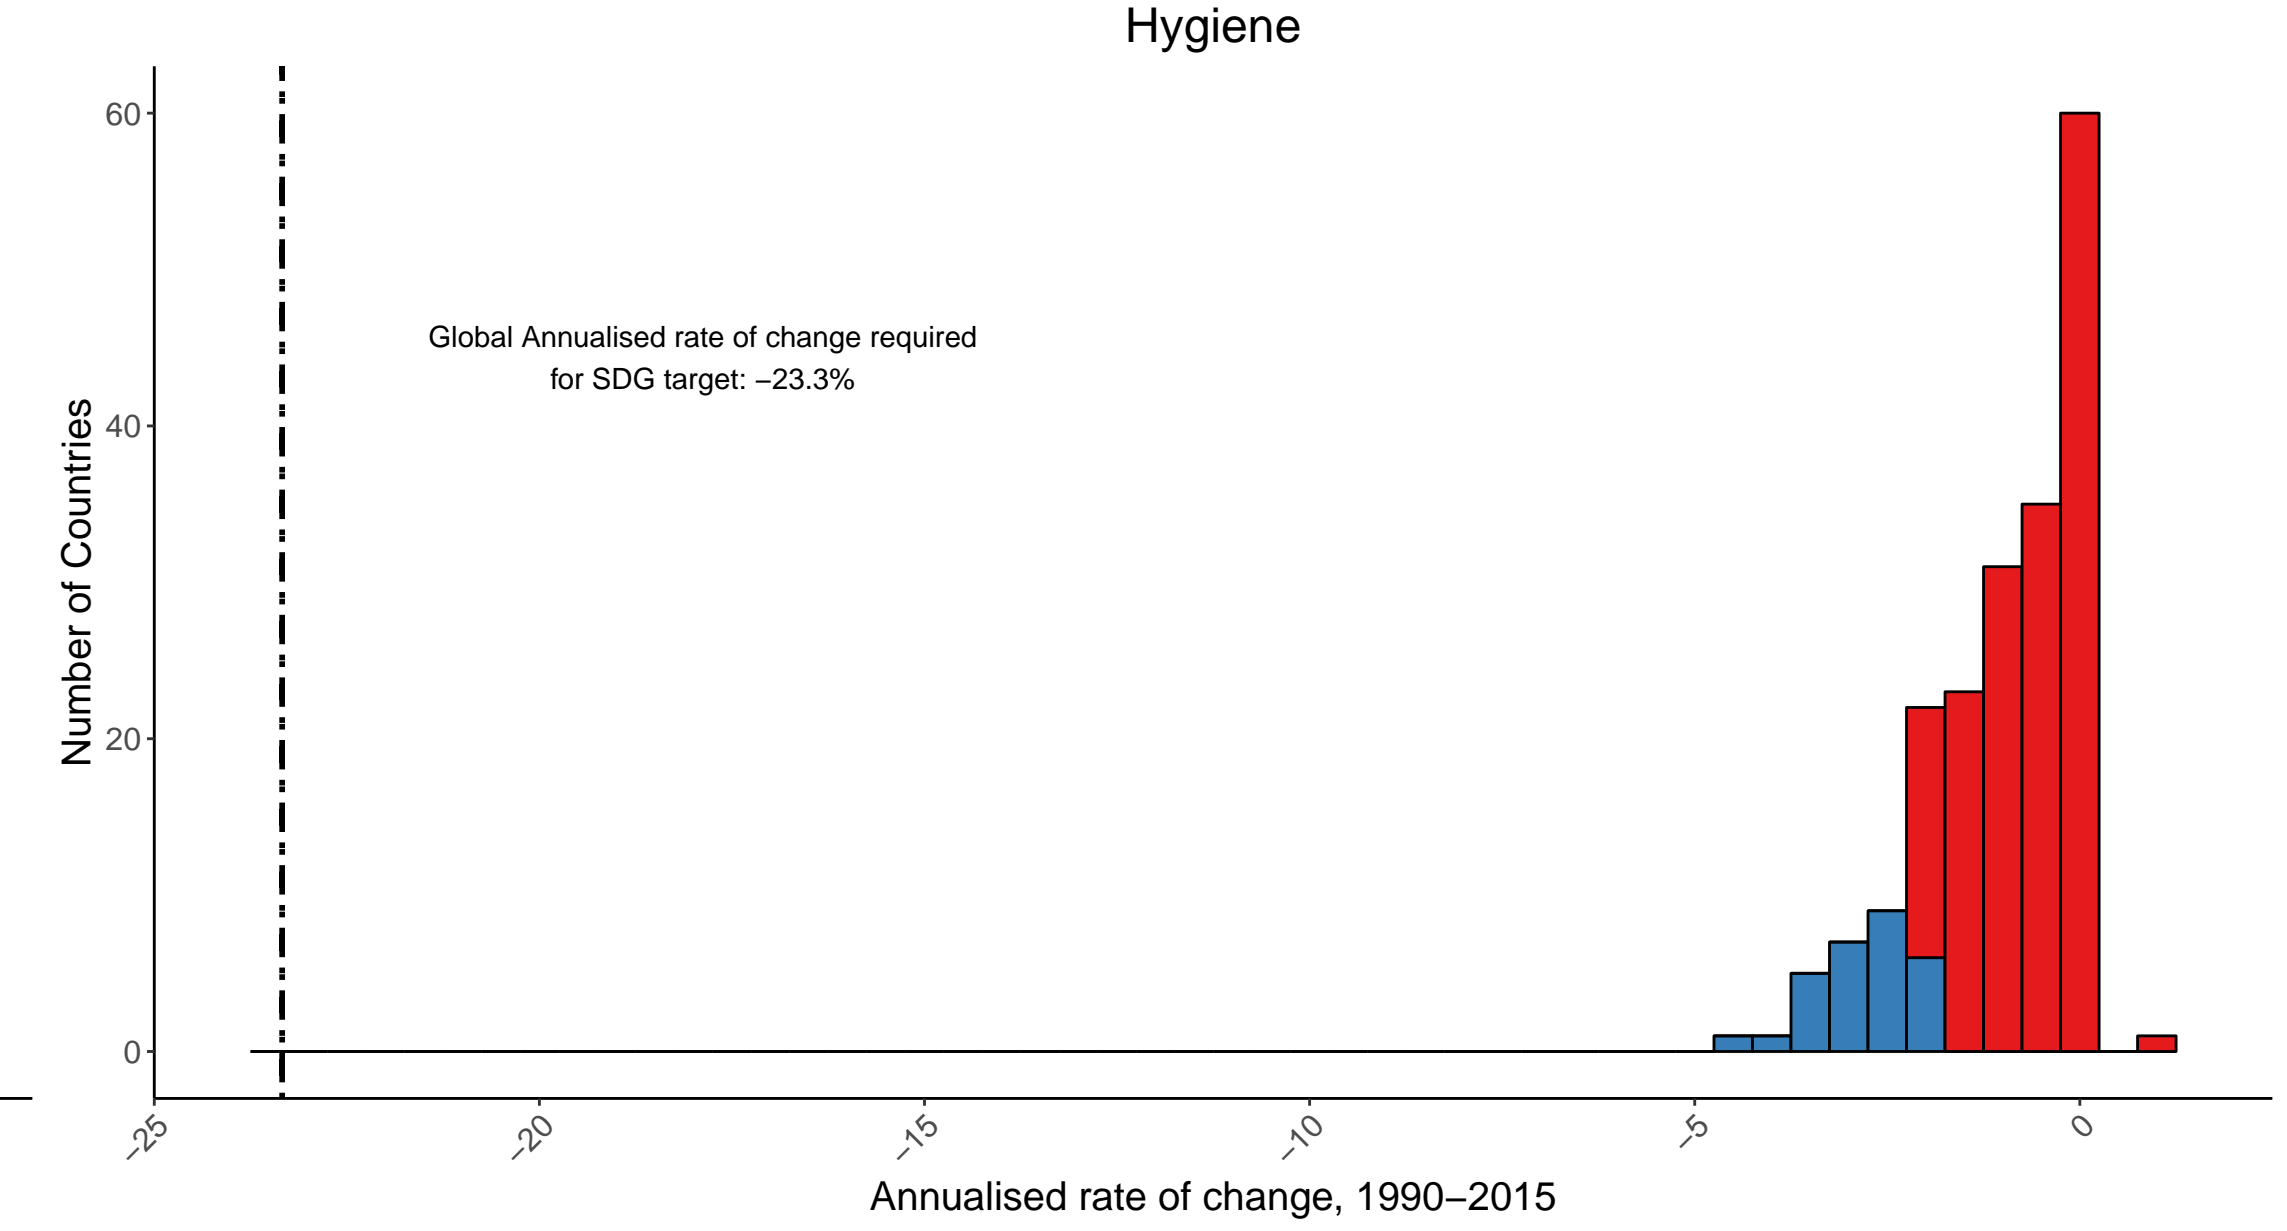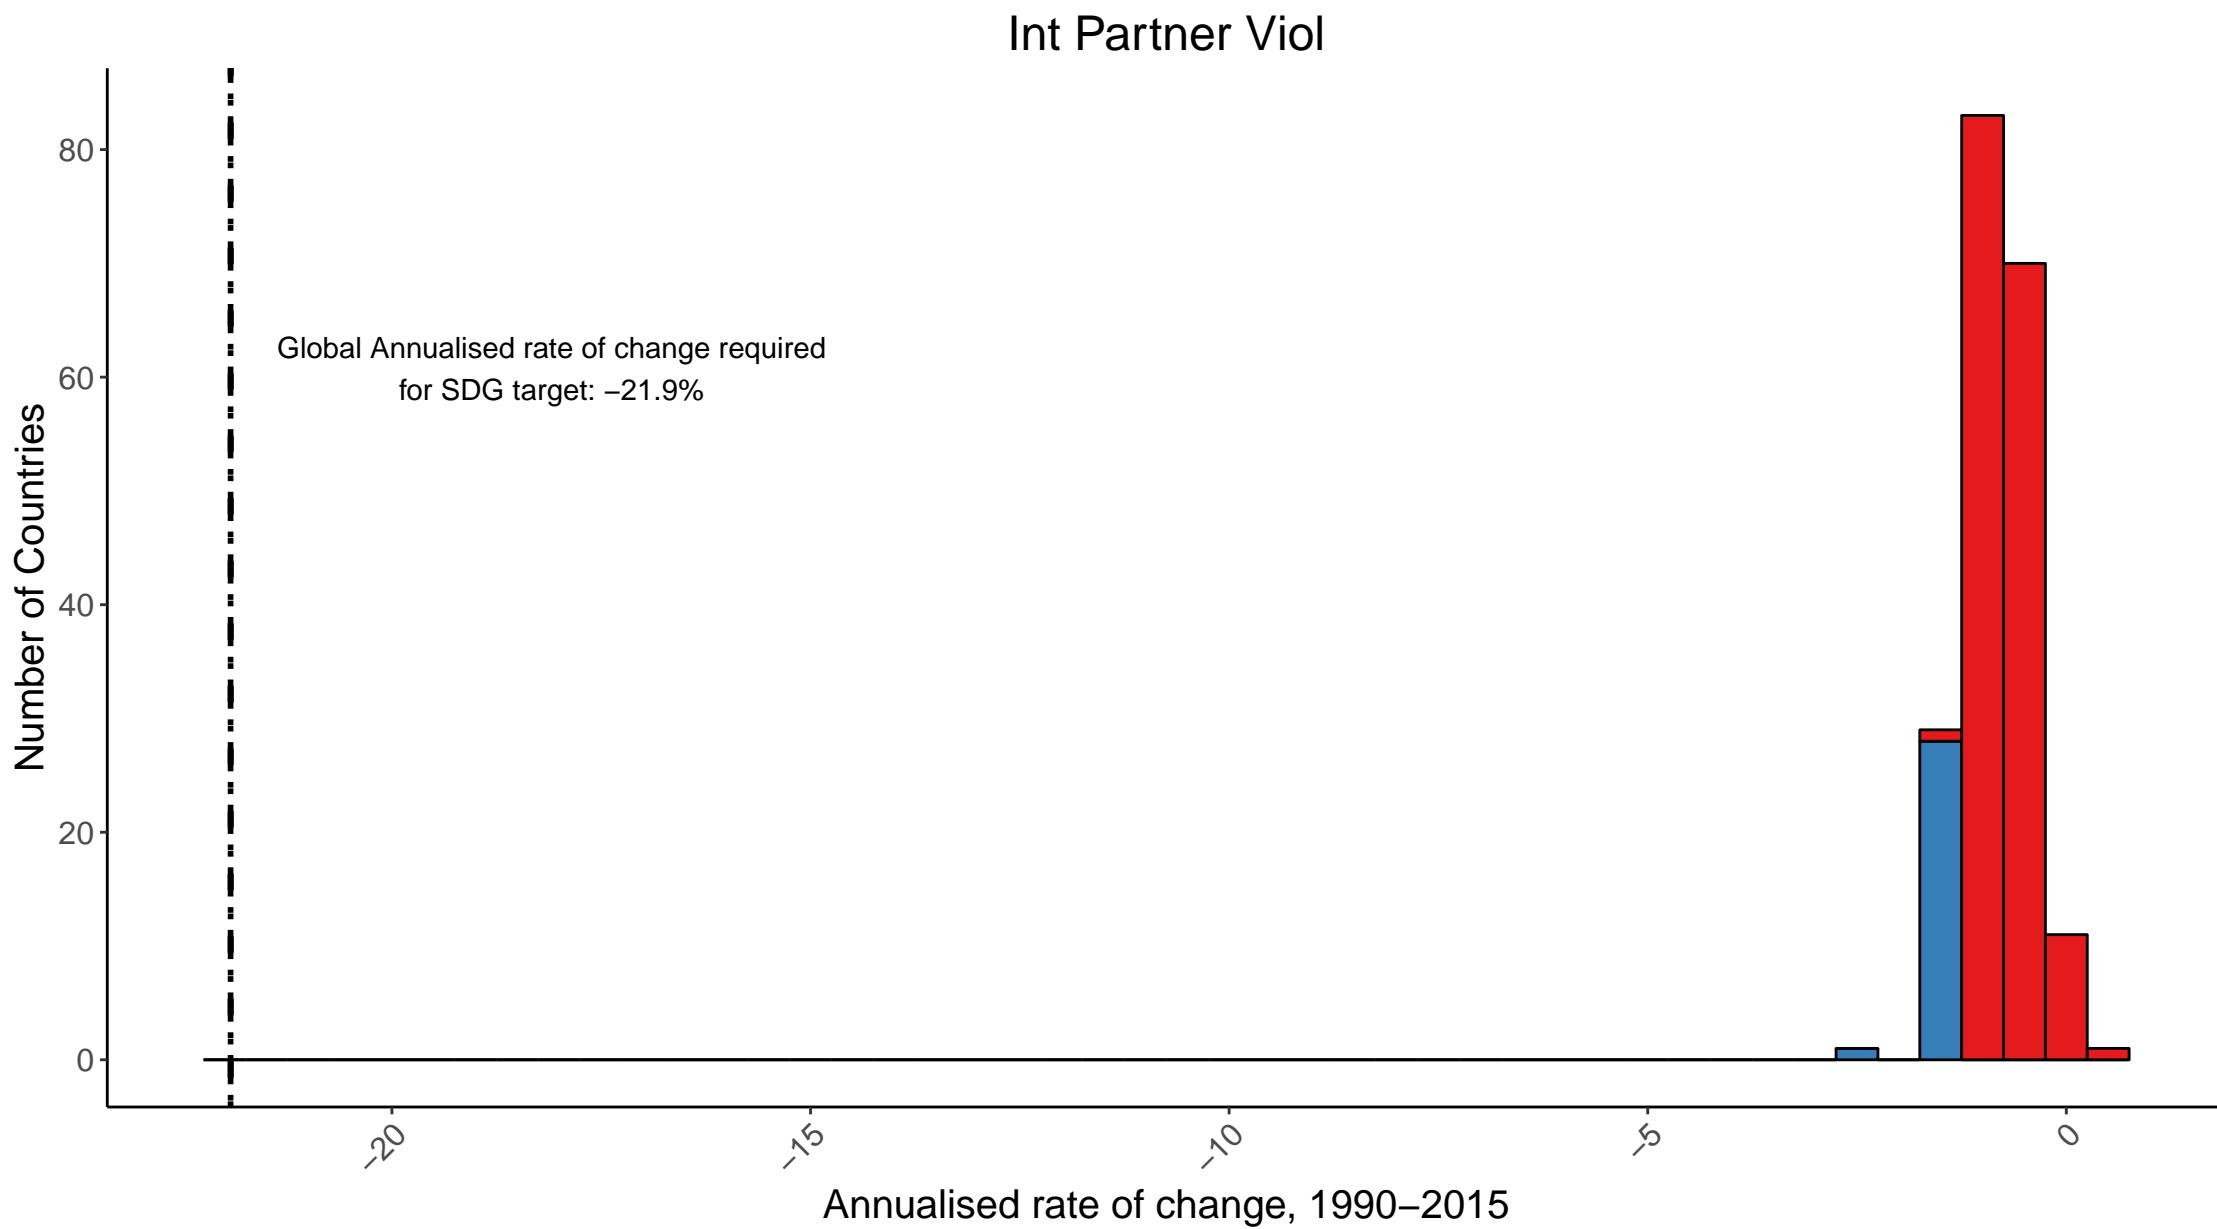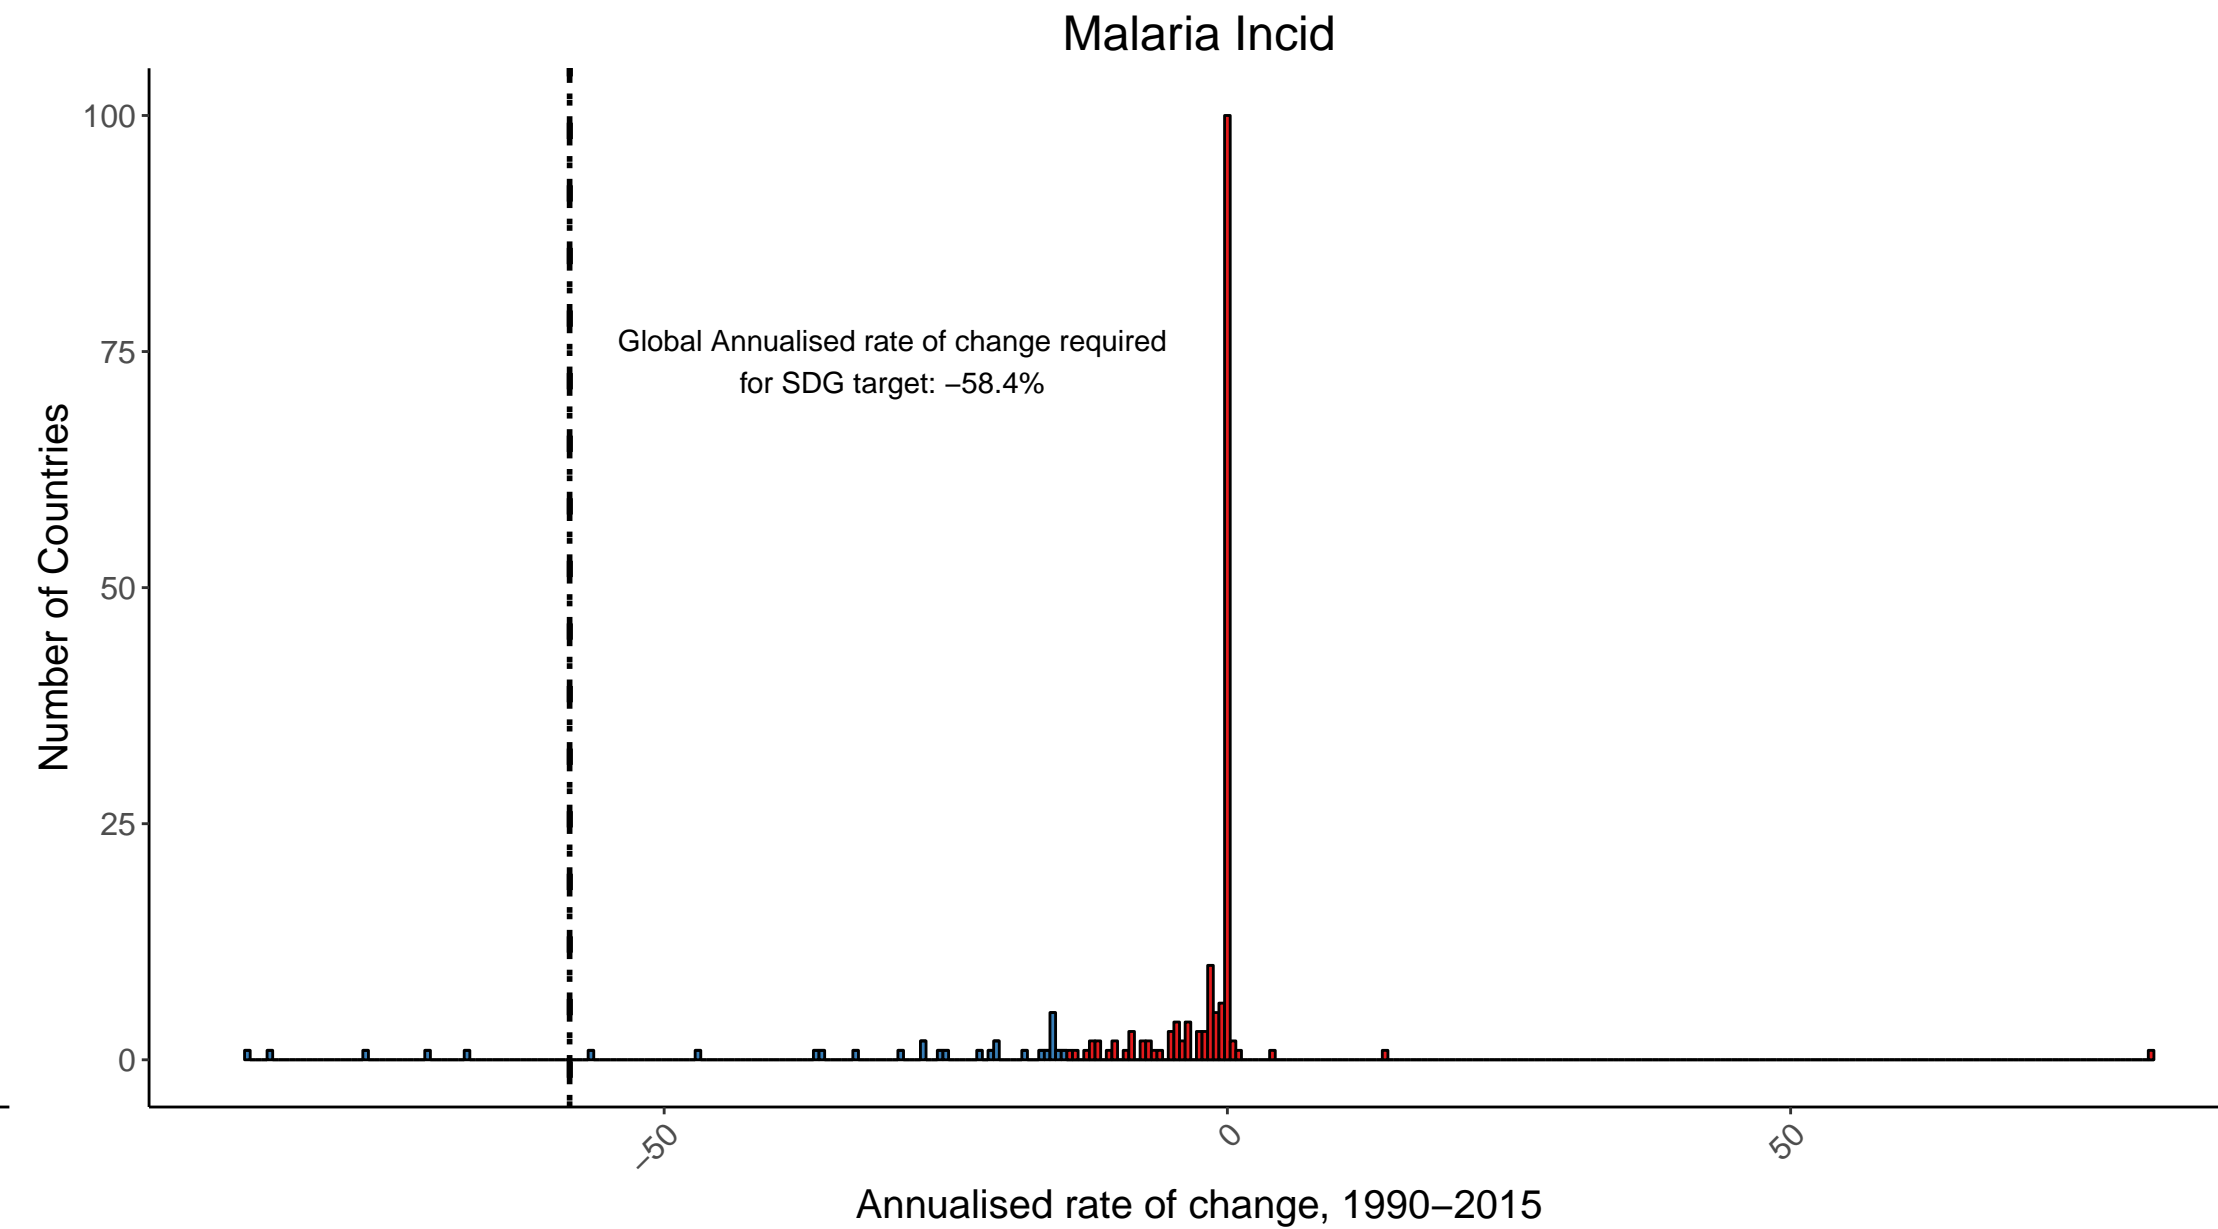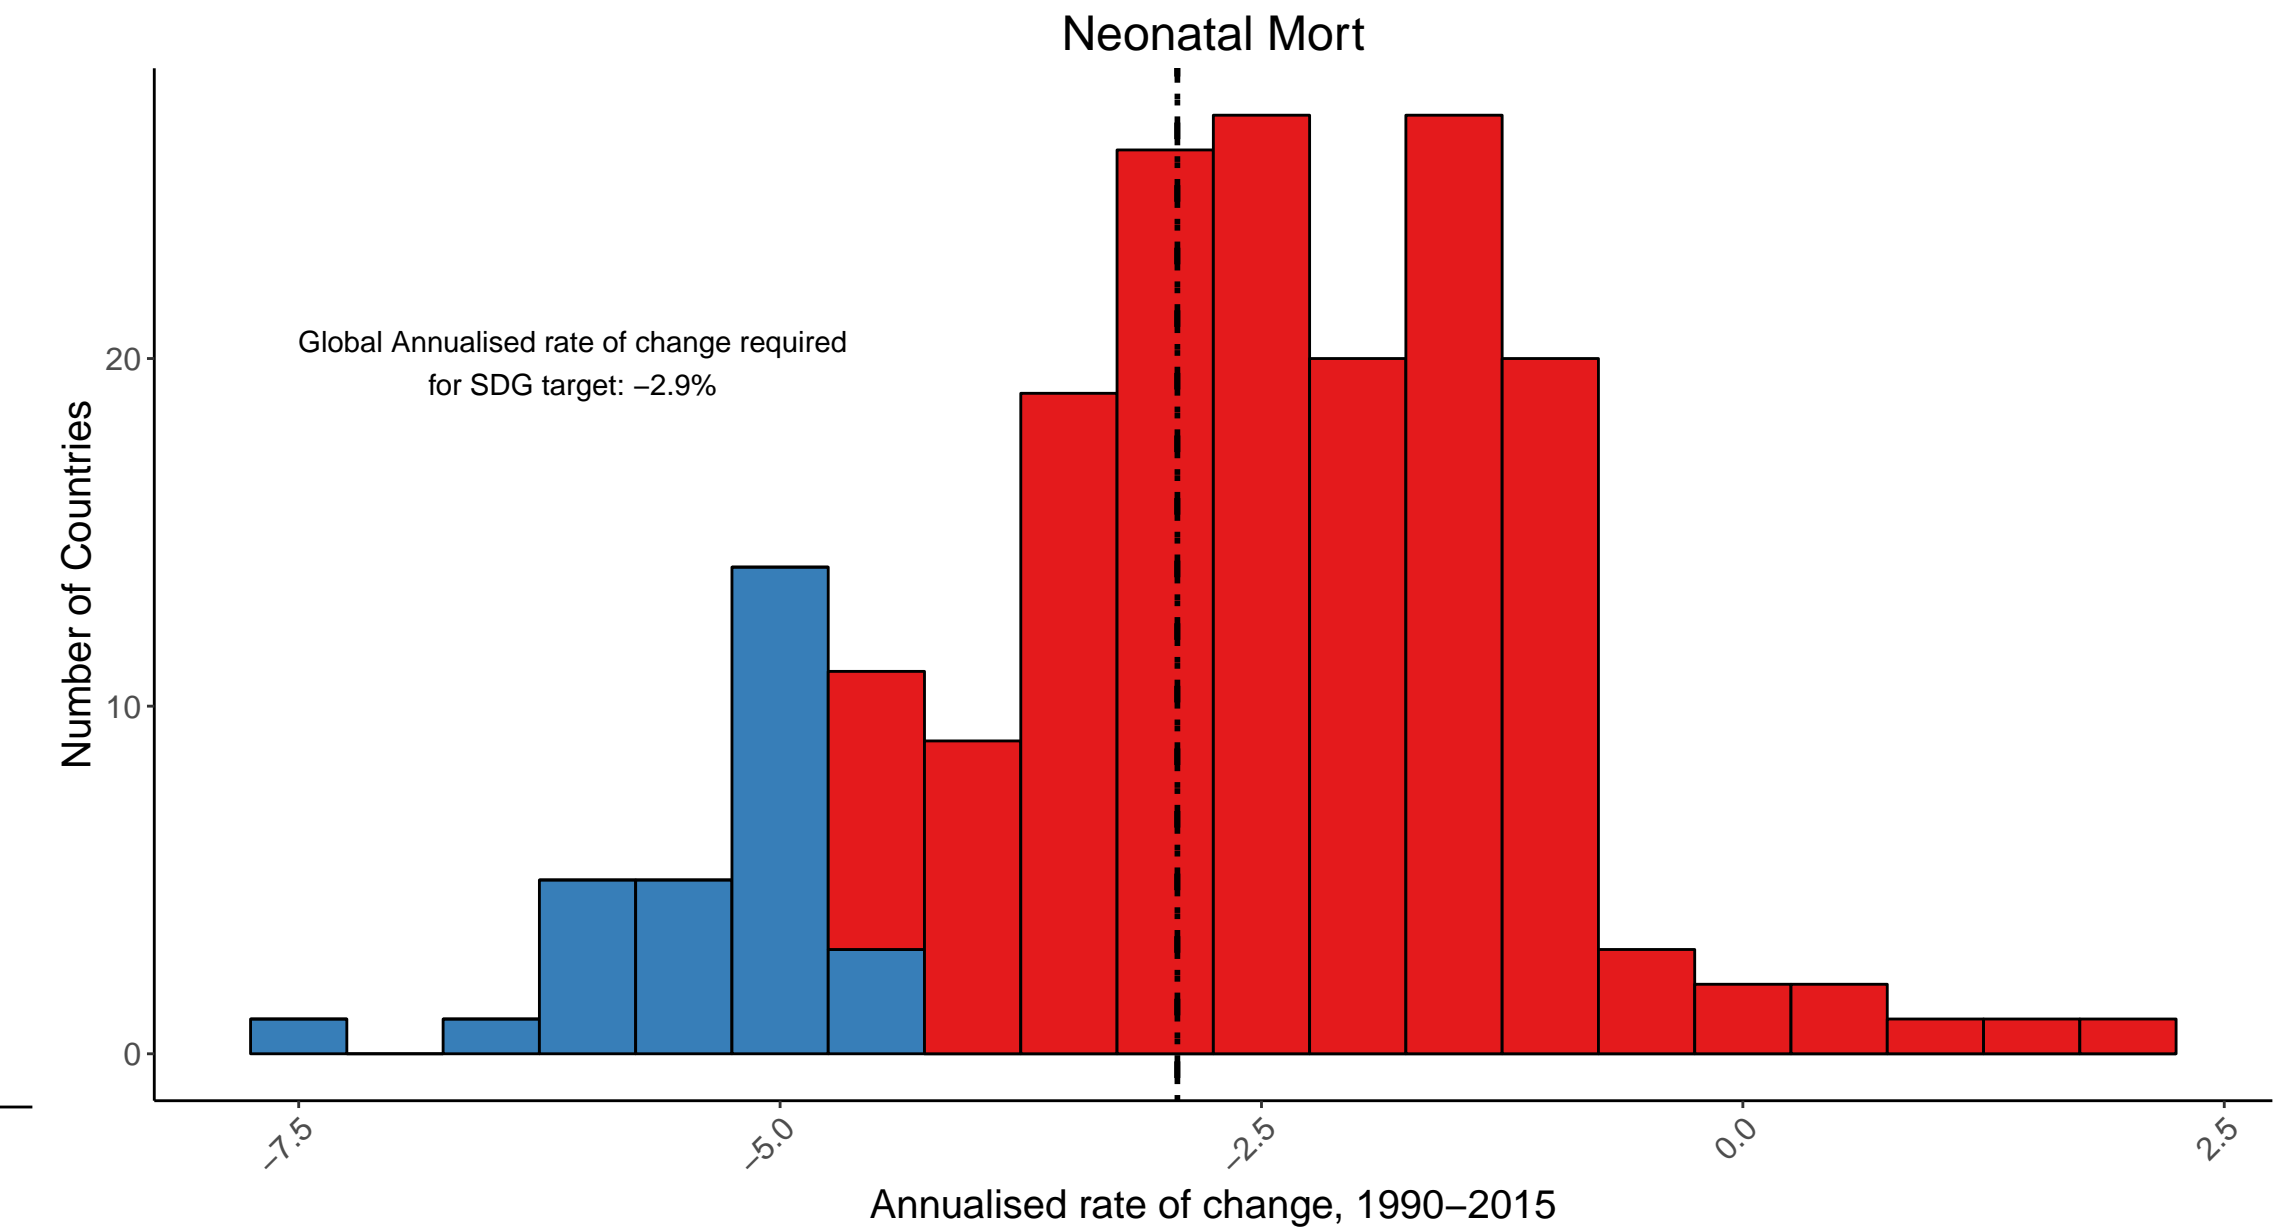

Deciles of Annualised rate of change ■ Best performing decile ■ Other deciles

Supplementary Figure 5. Global Annualised rate of change required to meet selected SDG targets based on Annualised rate of change achieved by countries from 1990–2015.

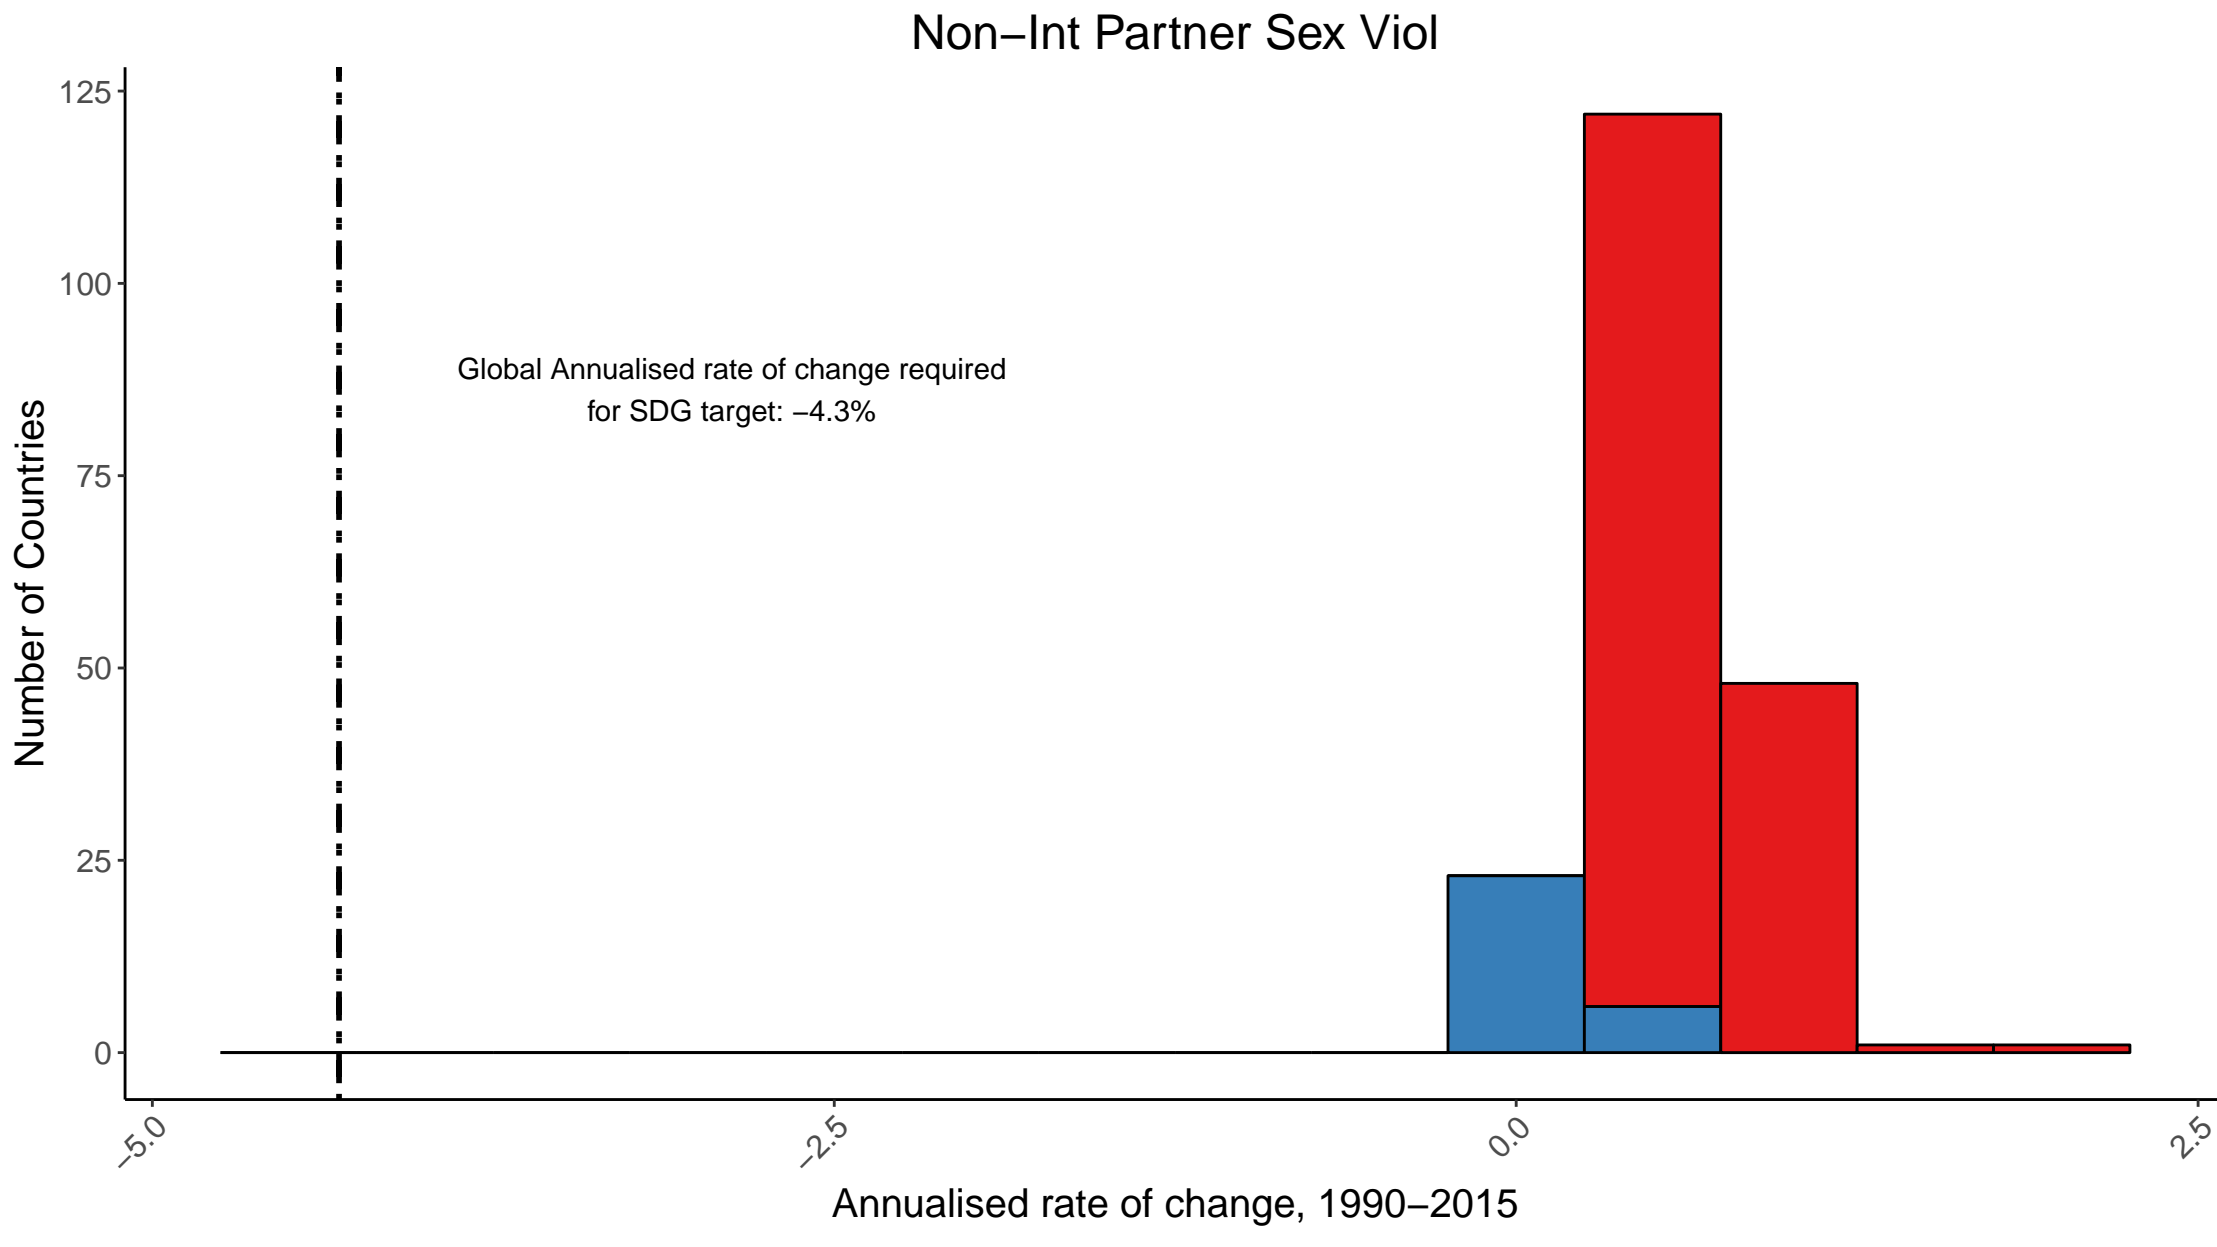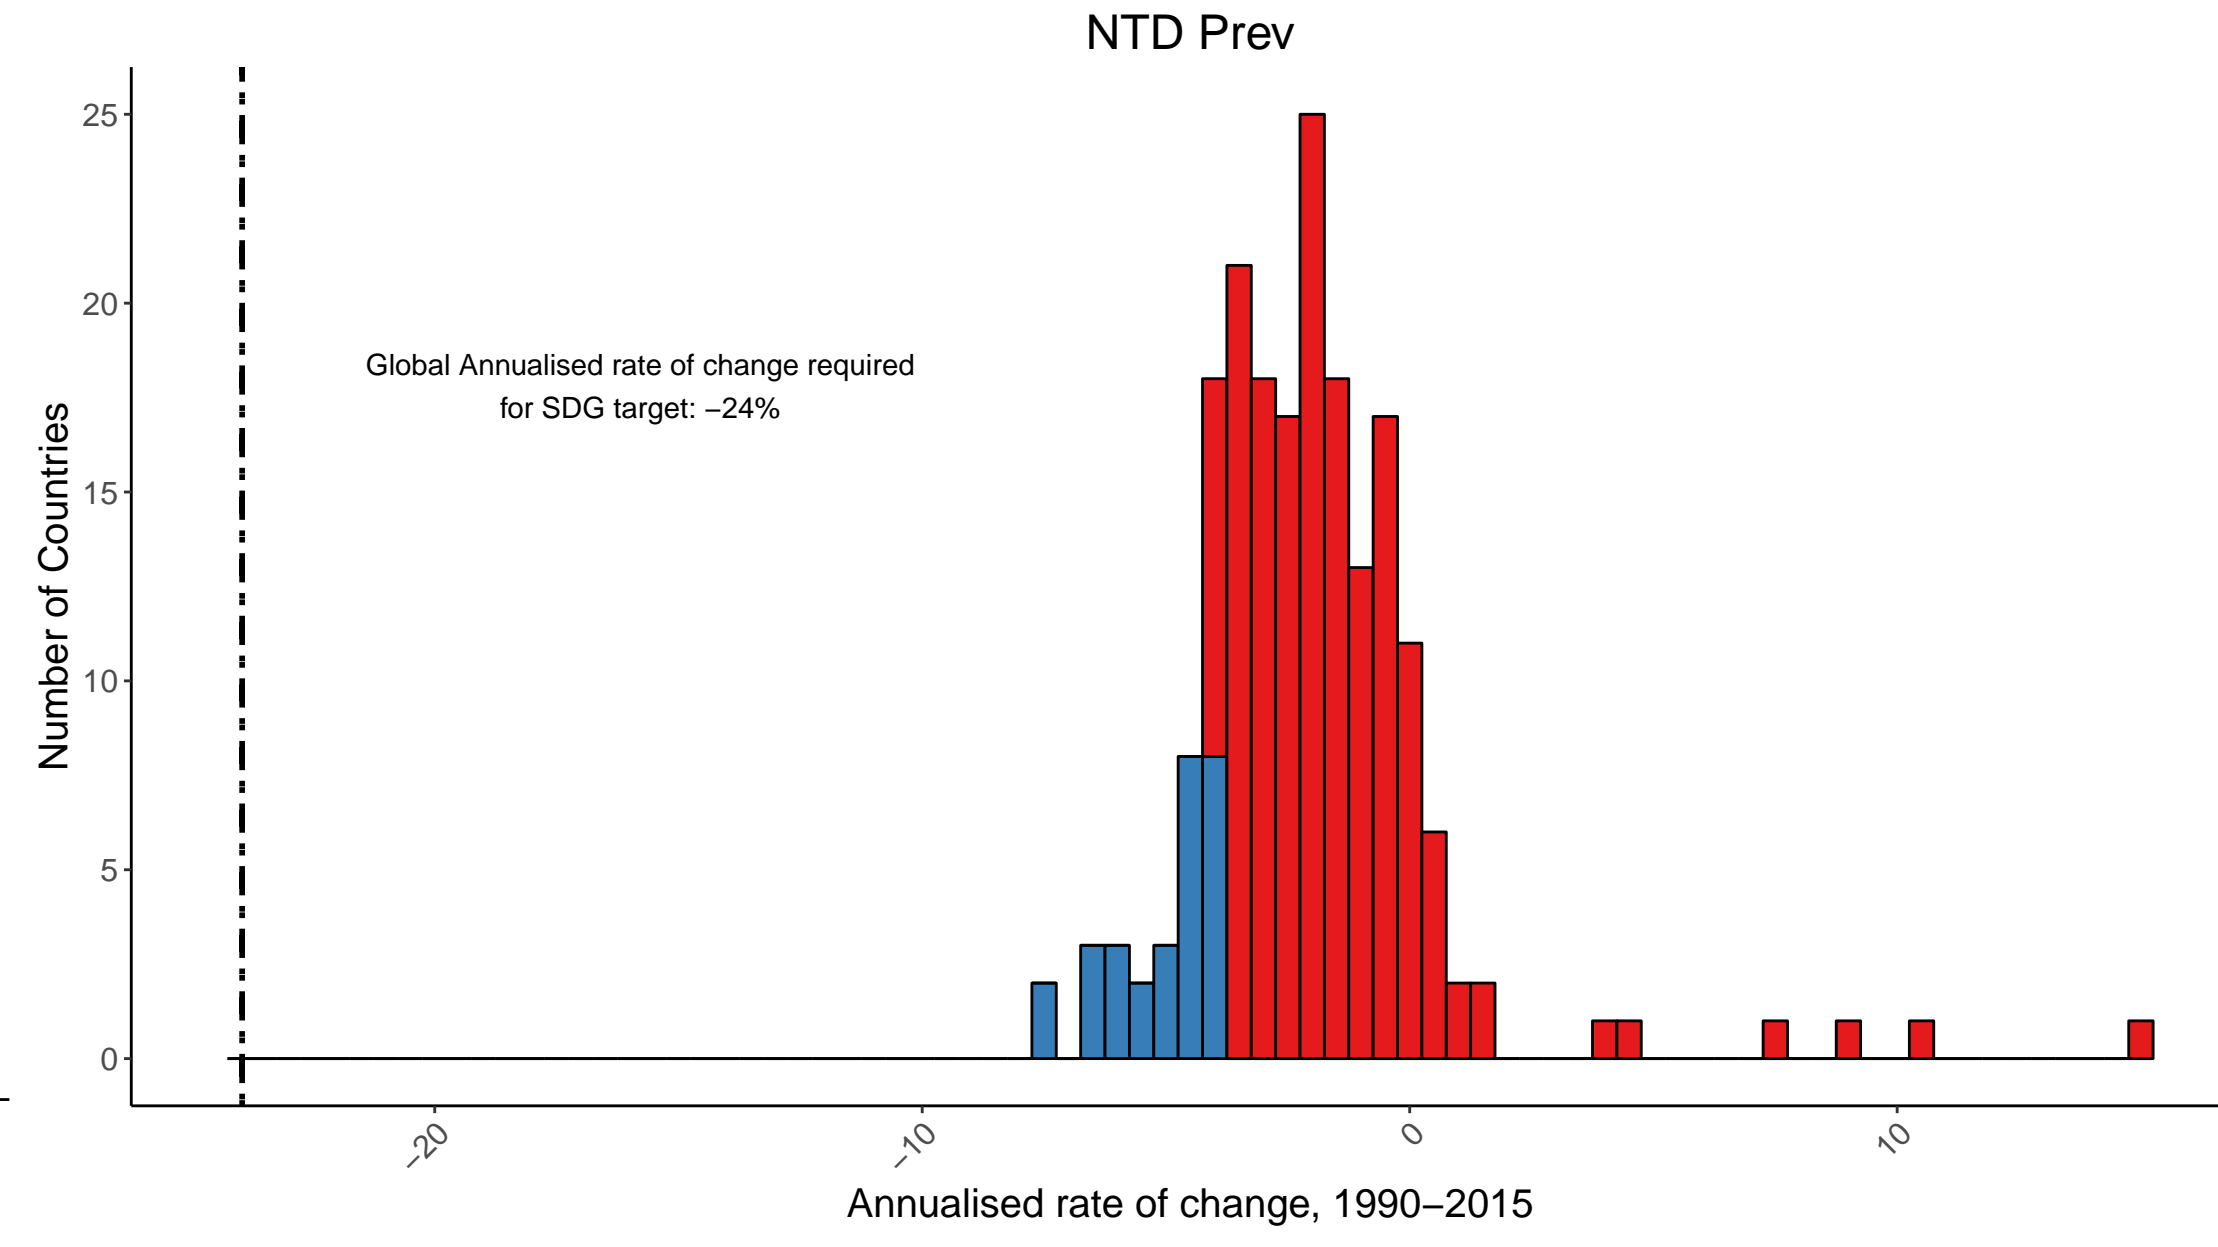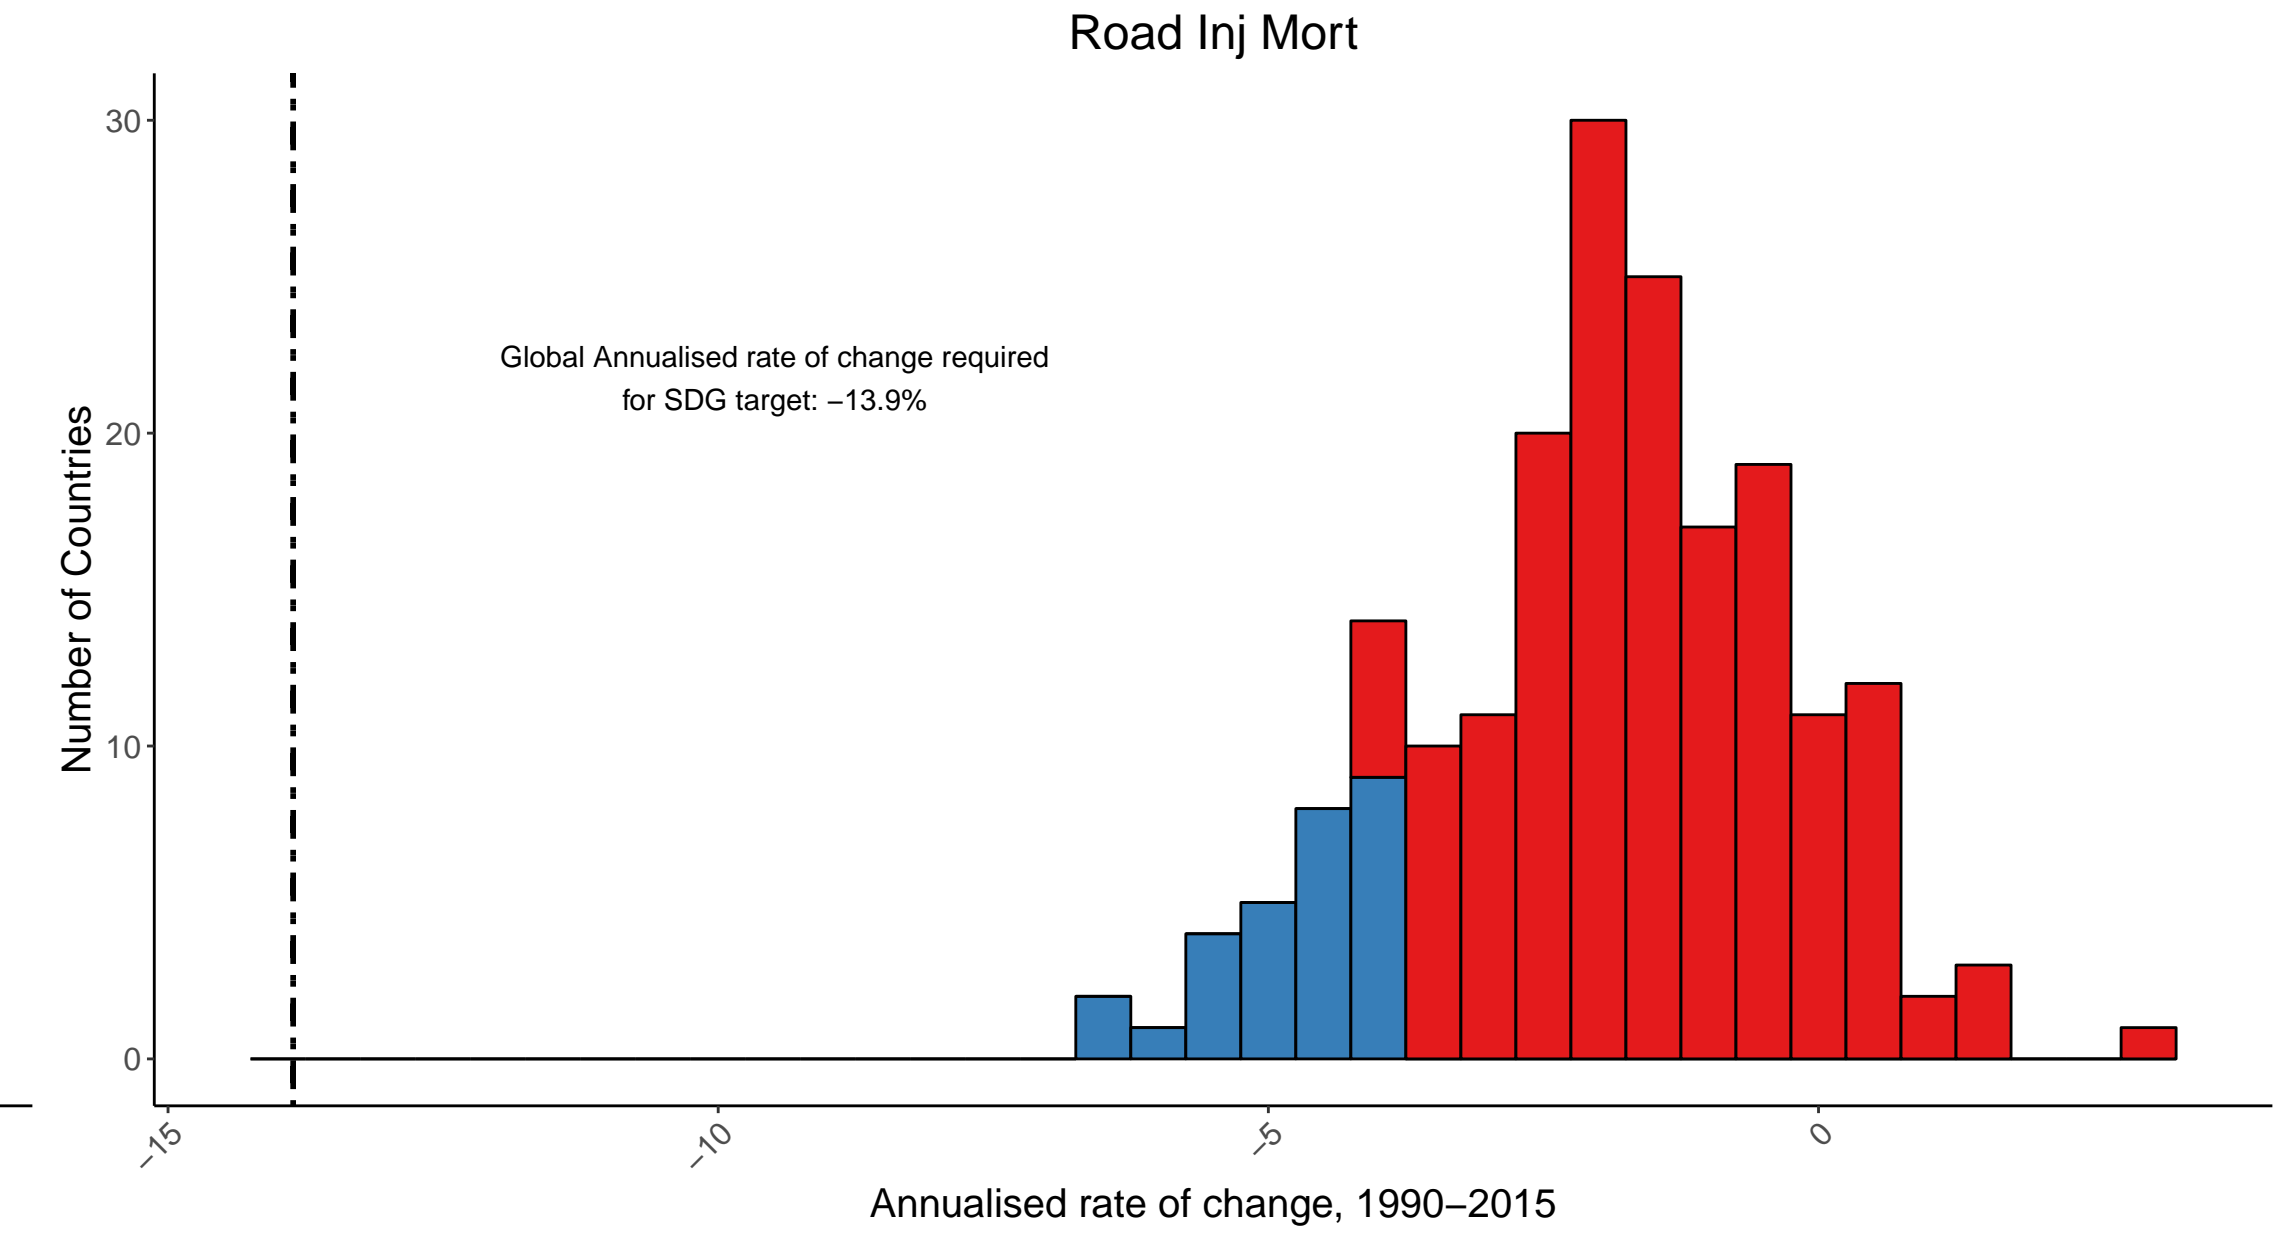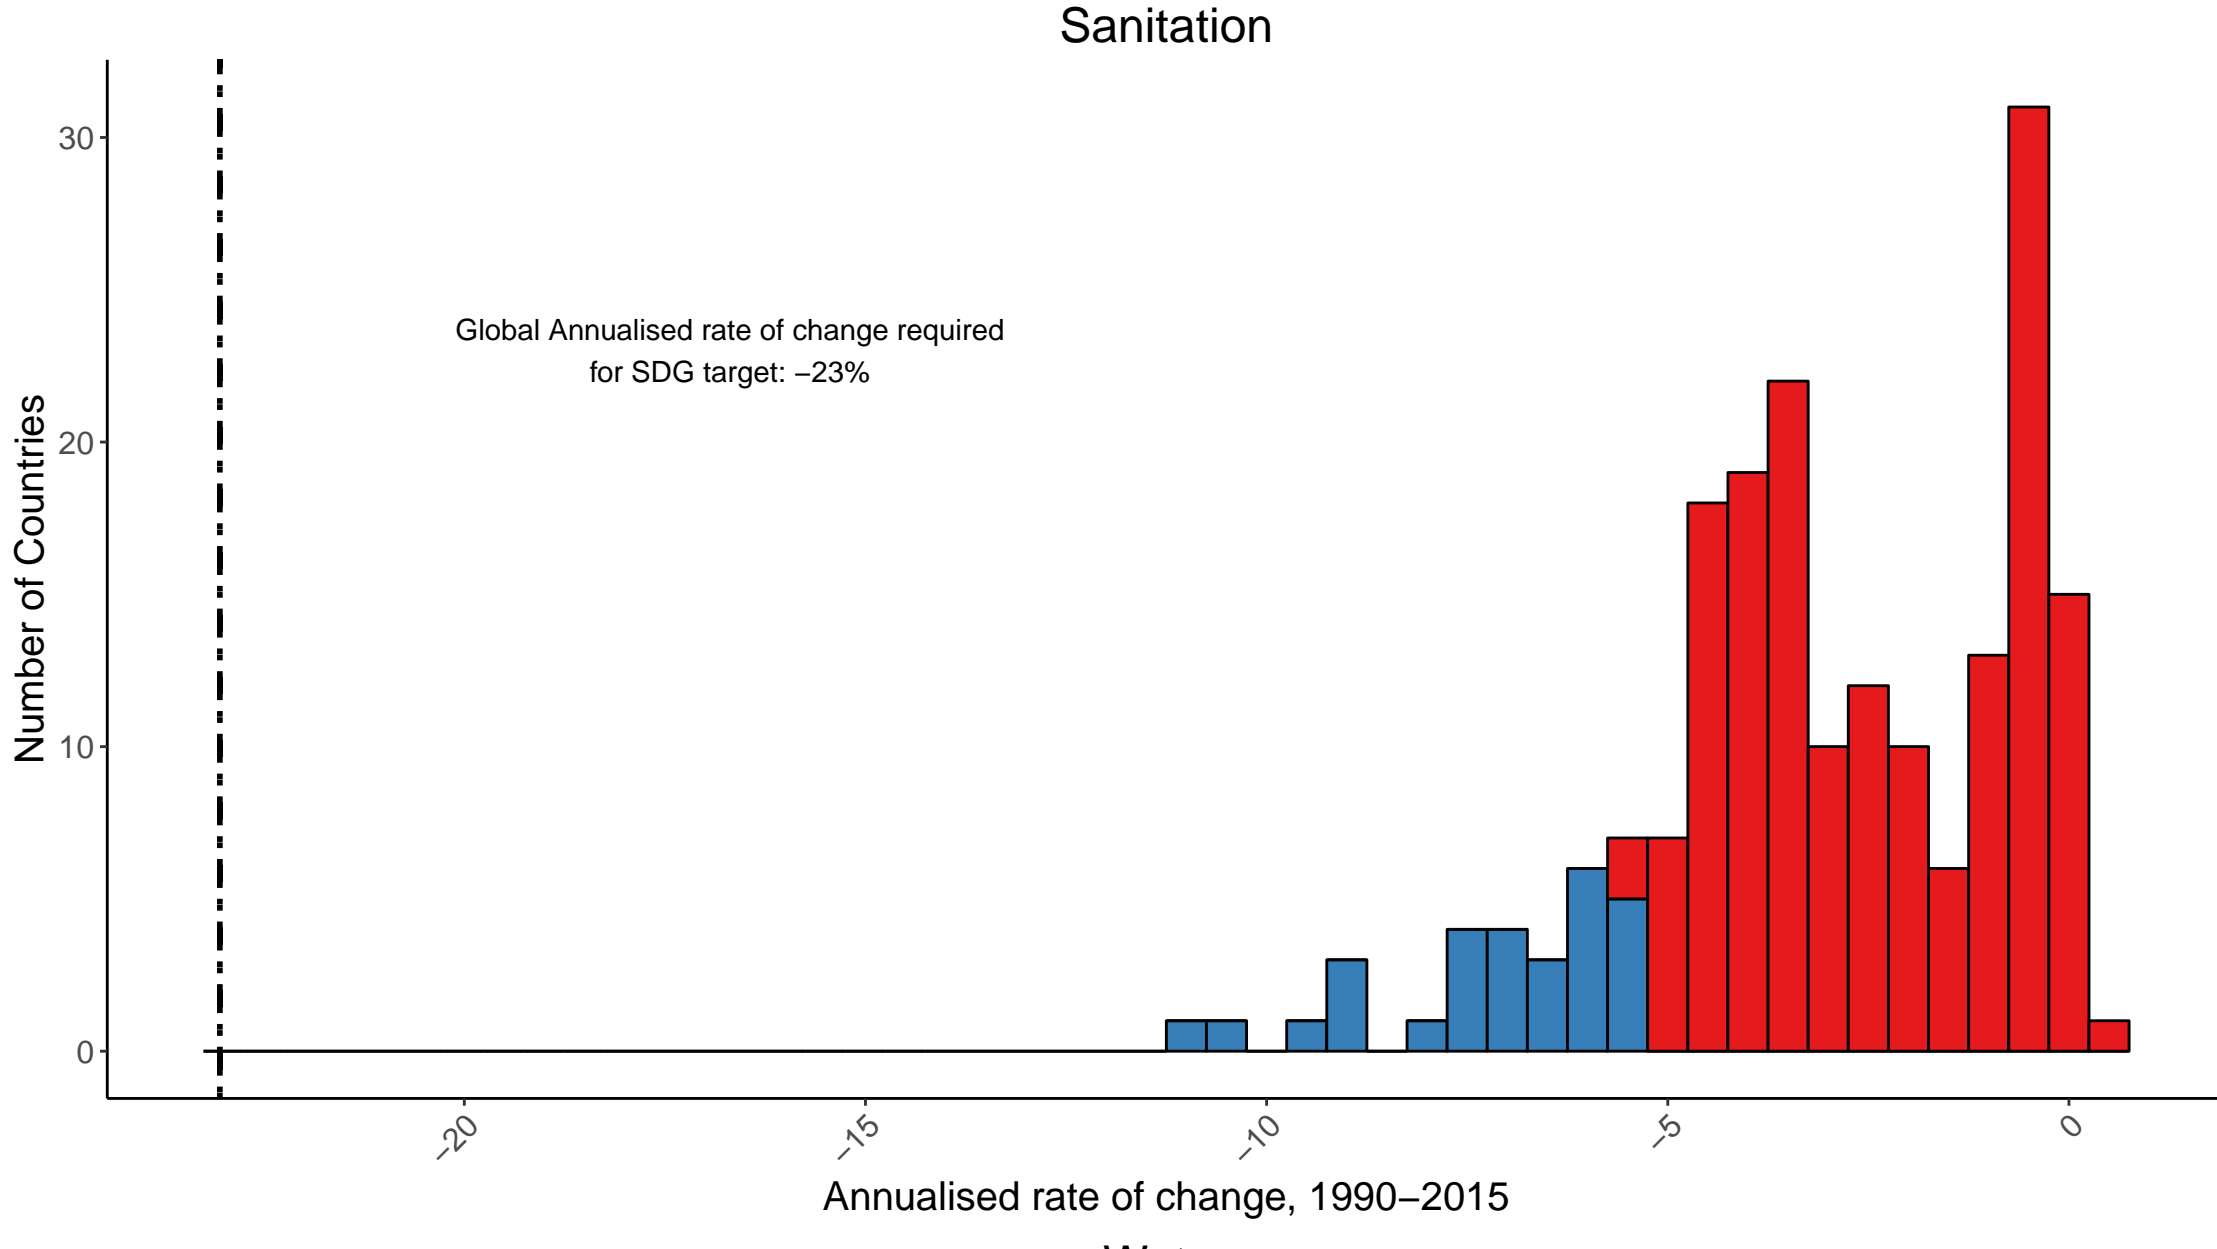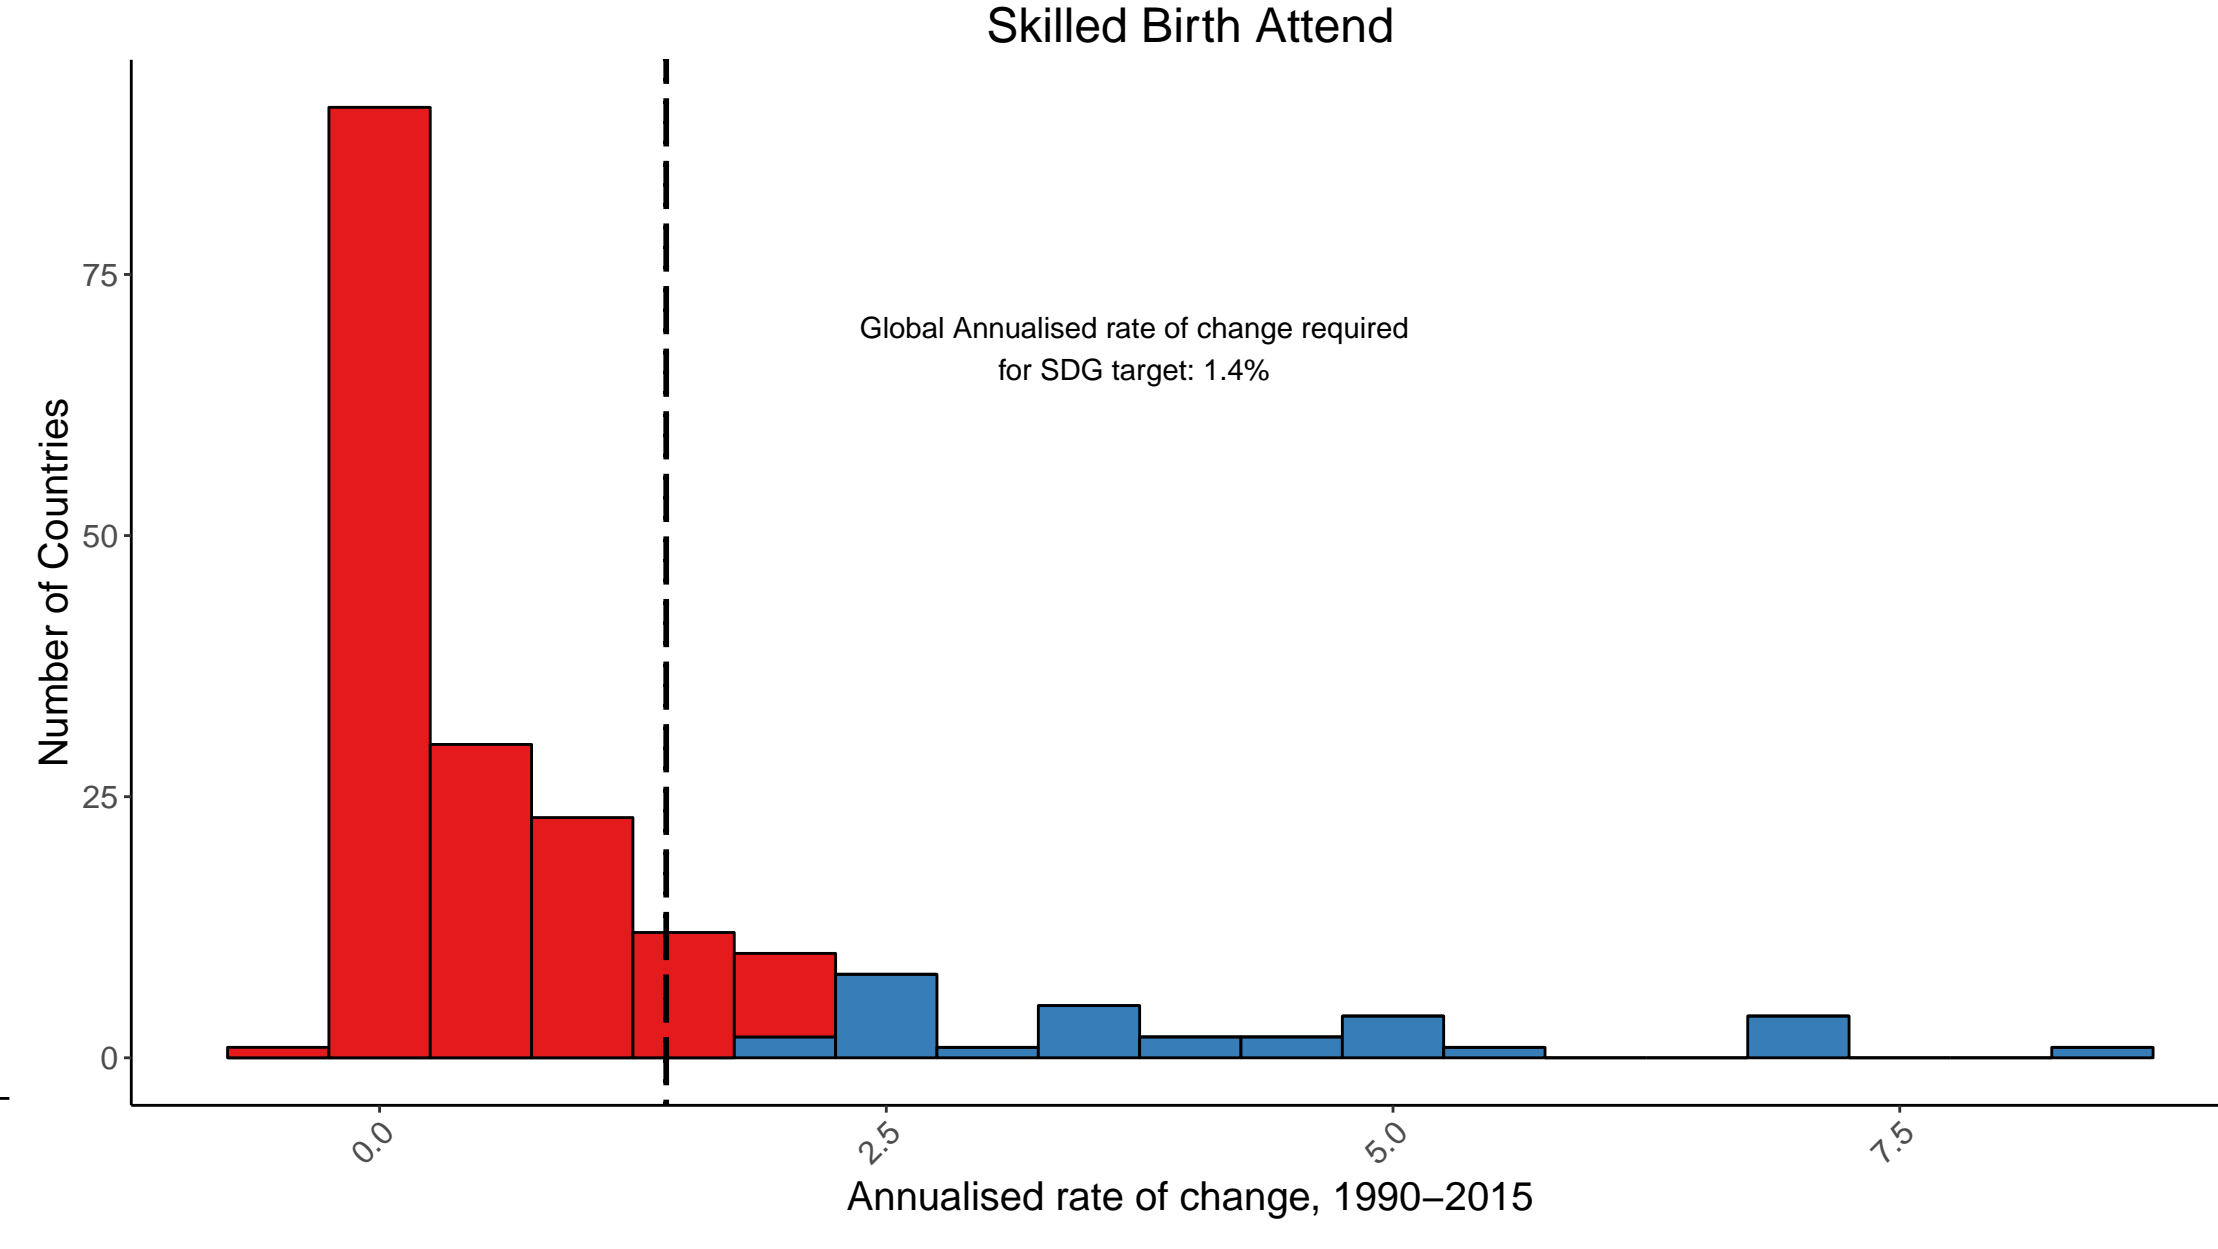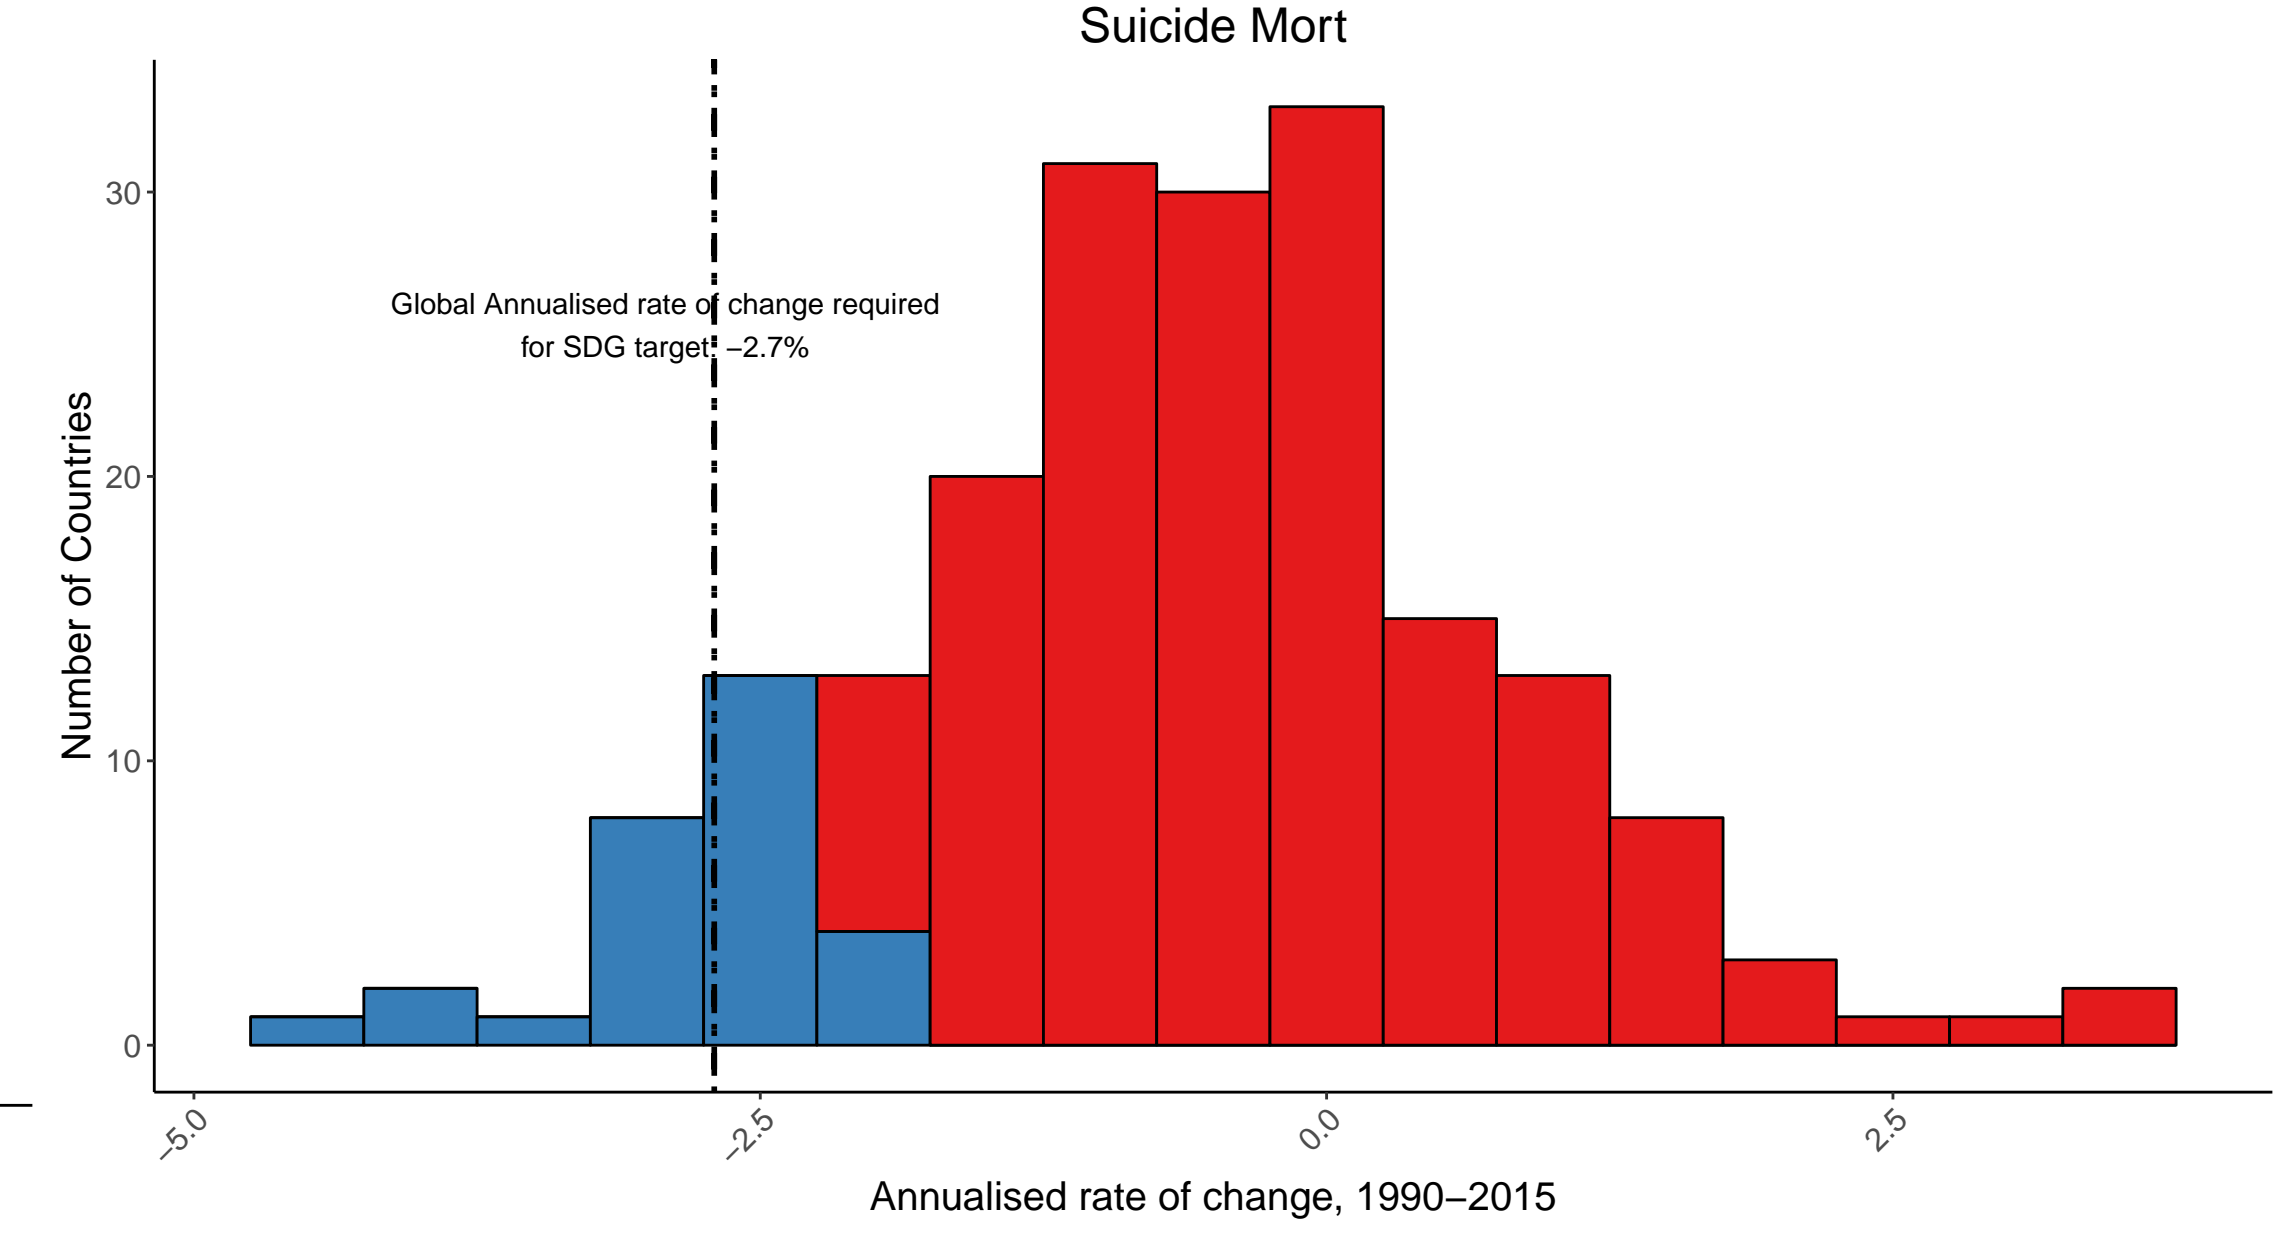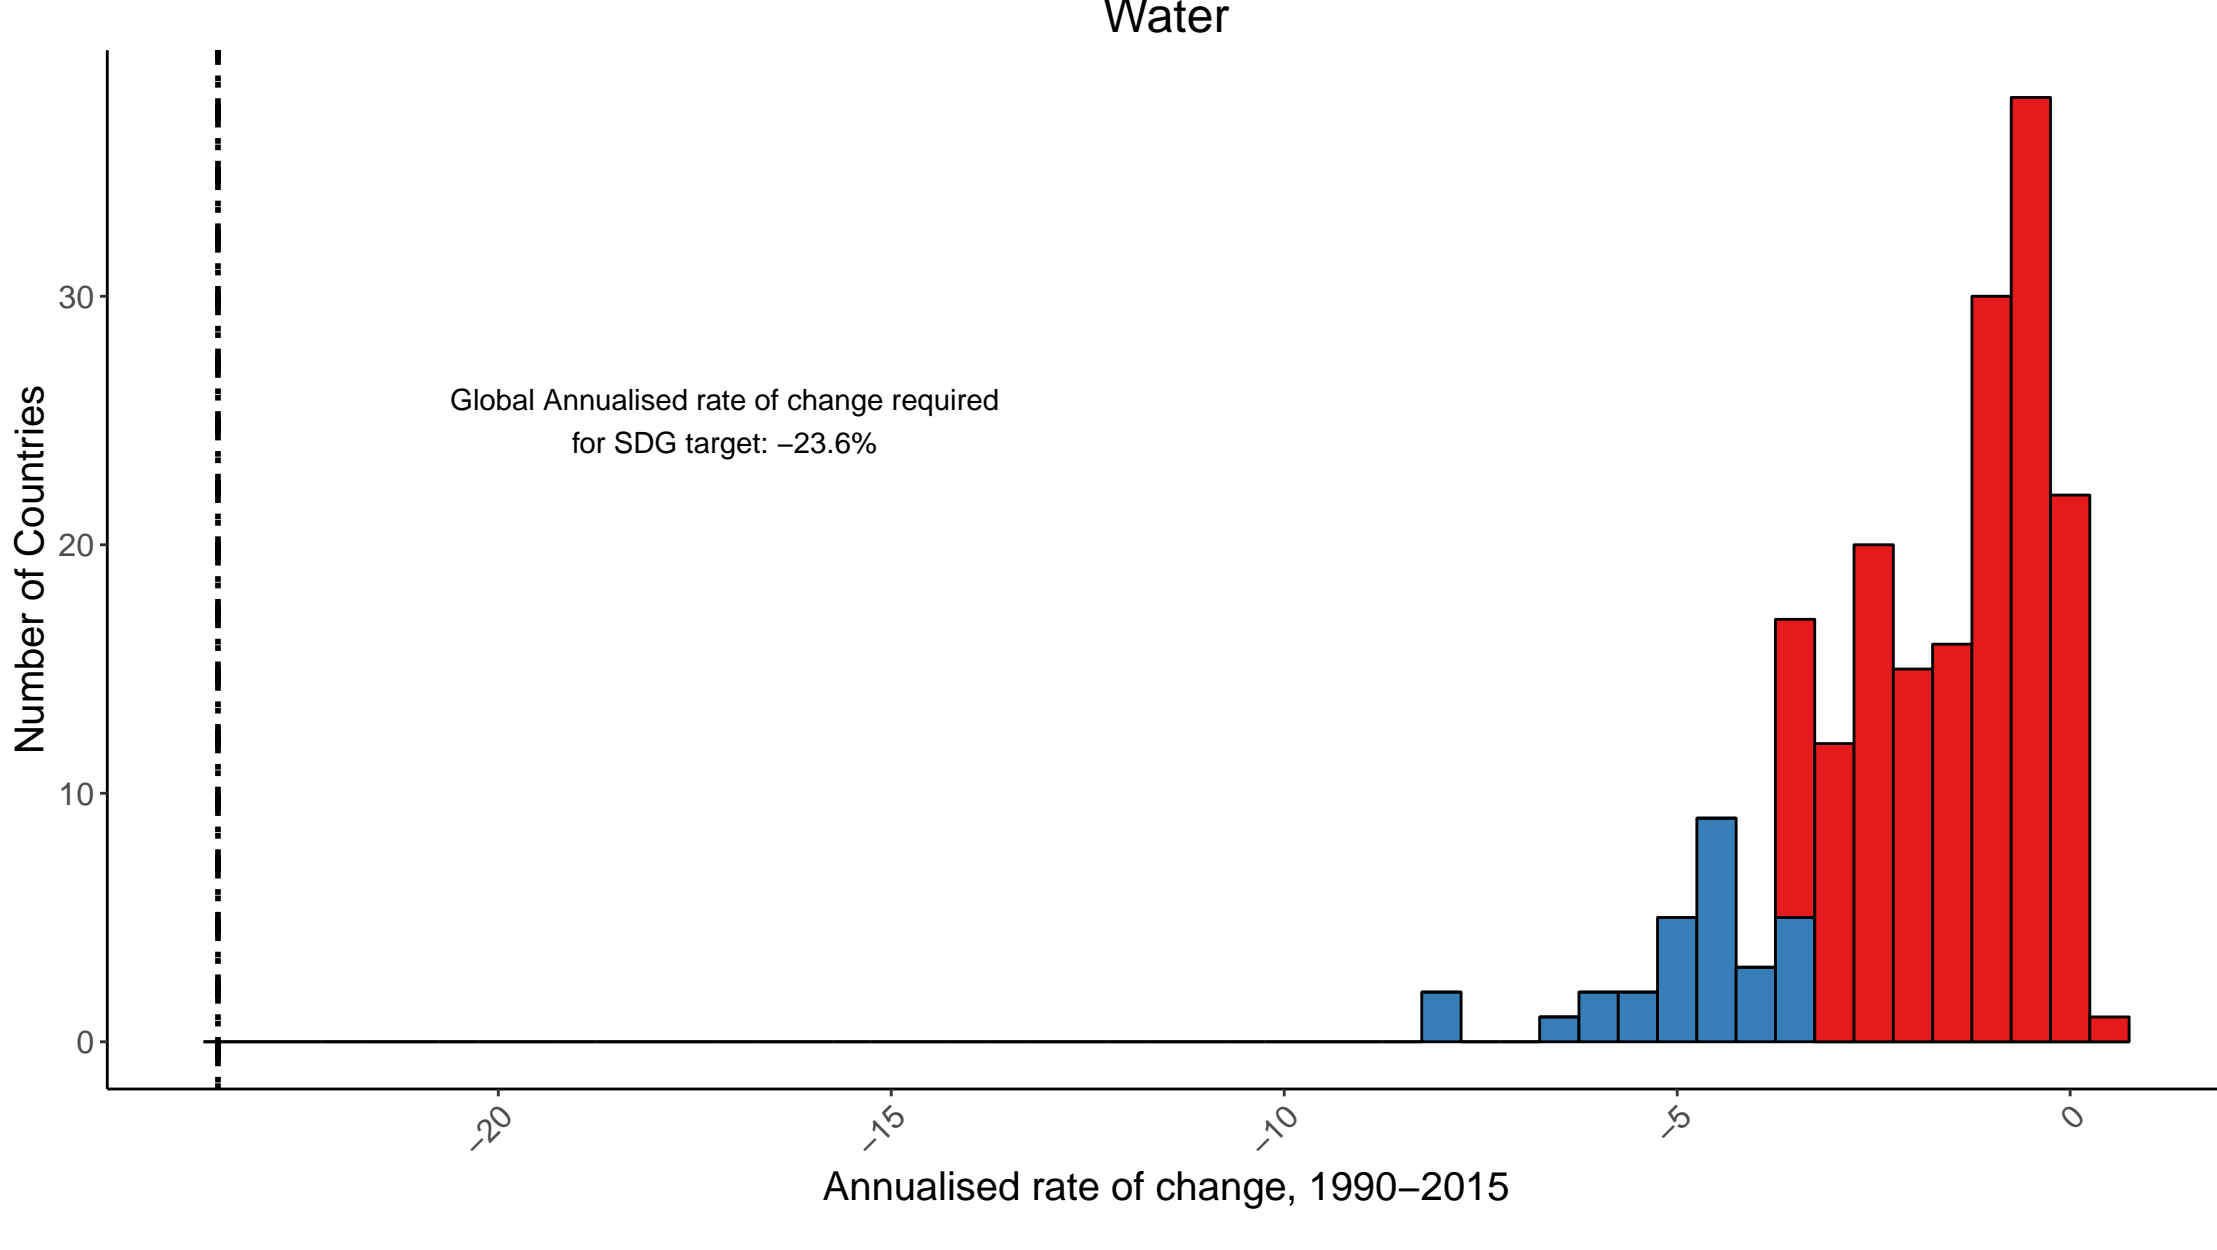

Deciles of Annualised rate of change ■ Best performing decile ■ Other deciles

Supplementary Figure 5. Global Annualised rate of change required to meet selected SDG targets based on Annualised rate of change achieved by countries from 1990-2015.

Supplementary figure 6. Comparing 2016 values on the health-related SDG index from GBD 2016 to 2017 values on the health-related SDG index from GBD 2017

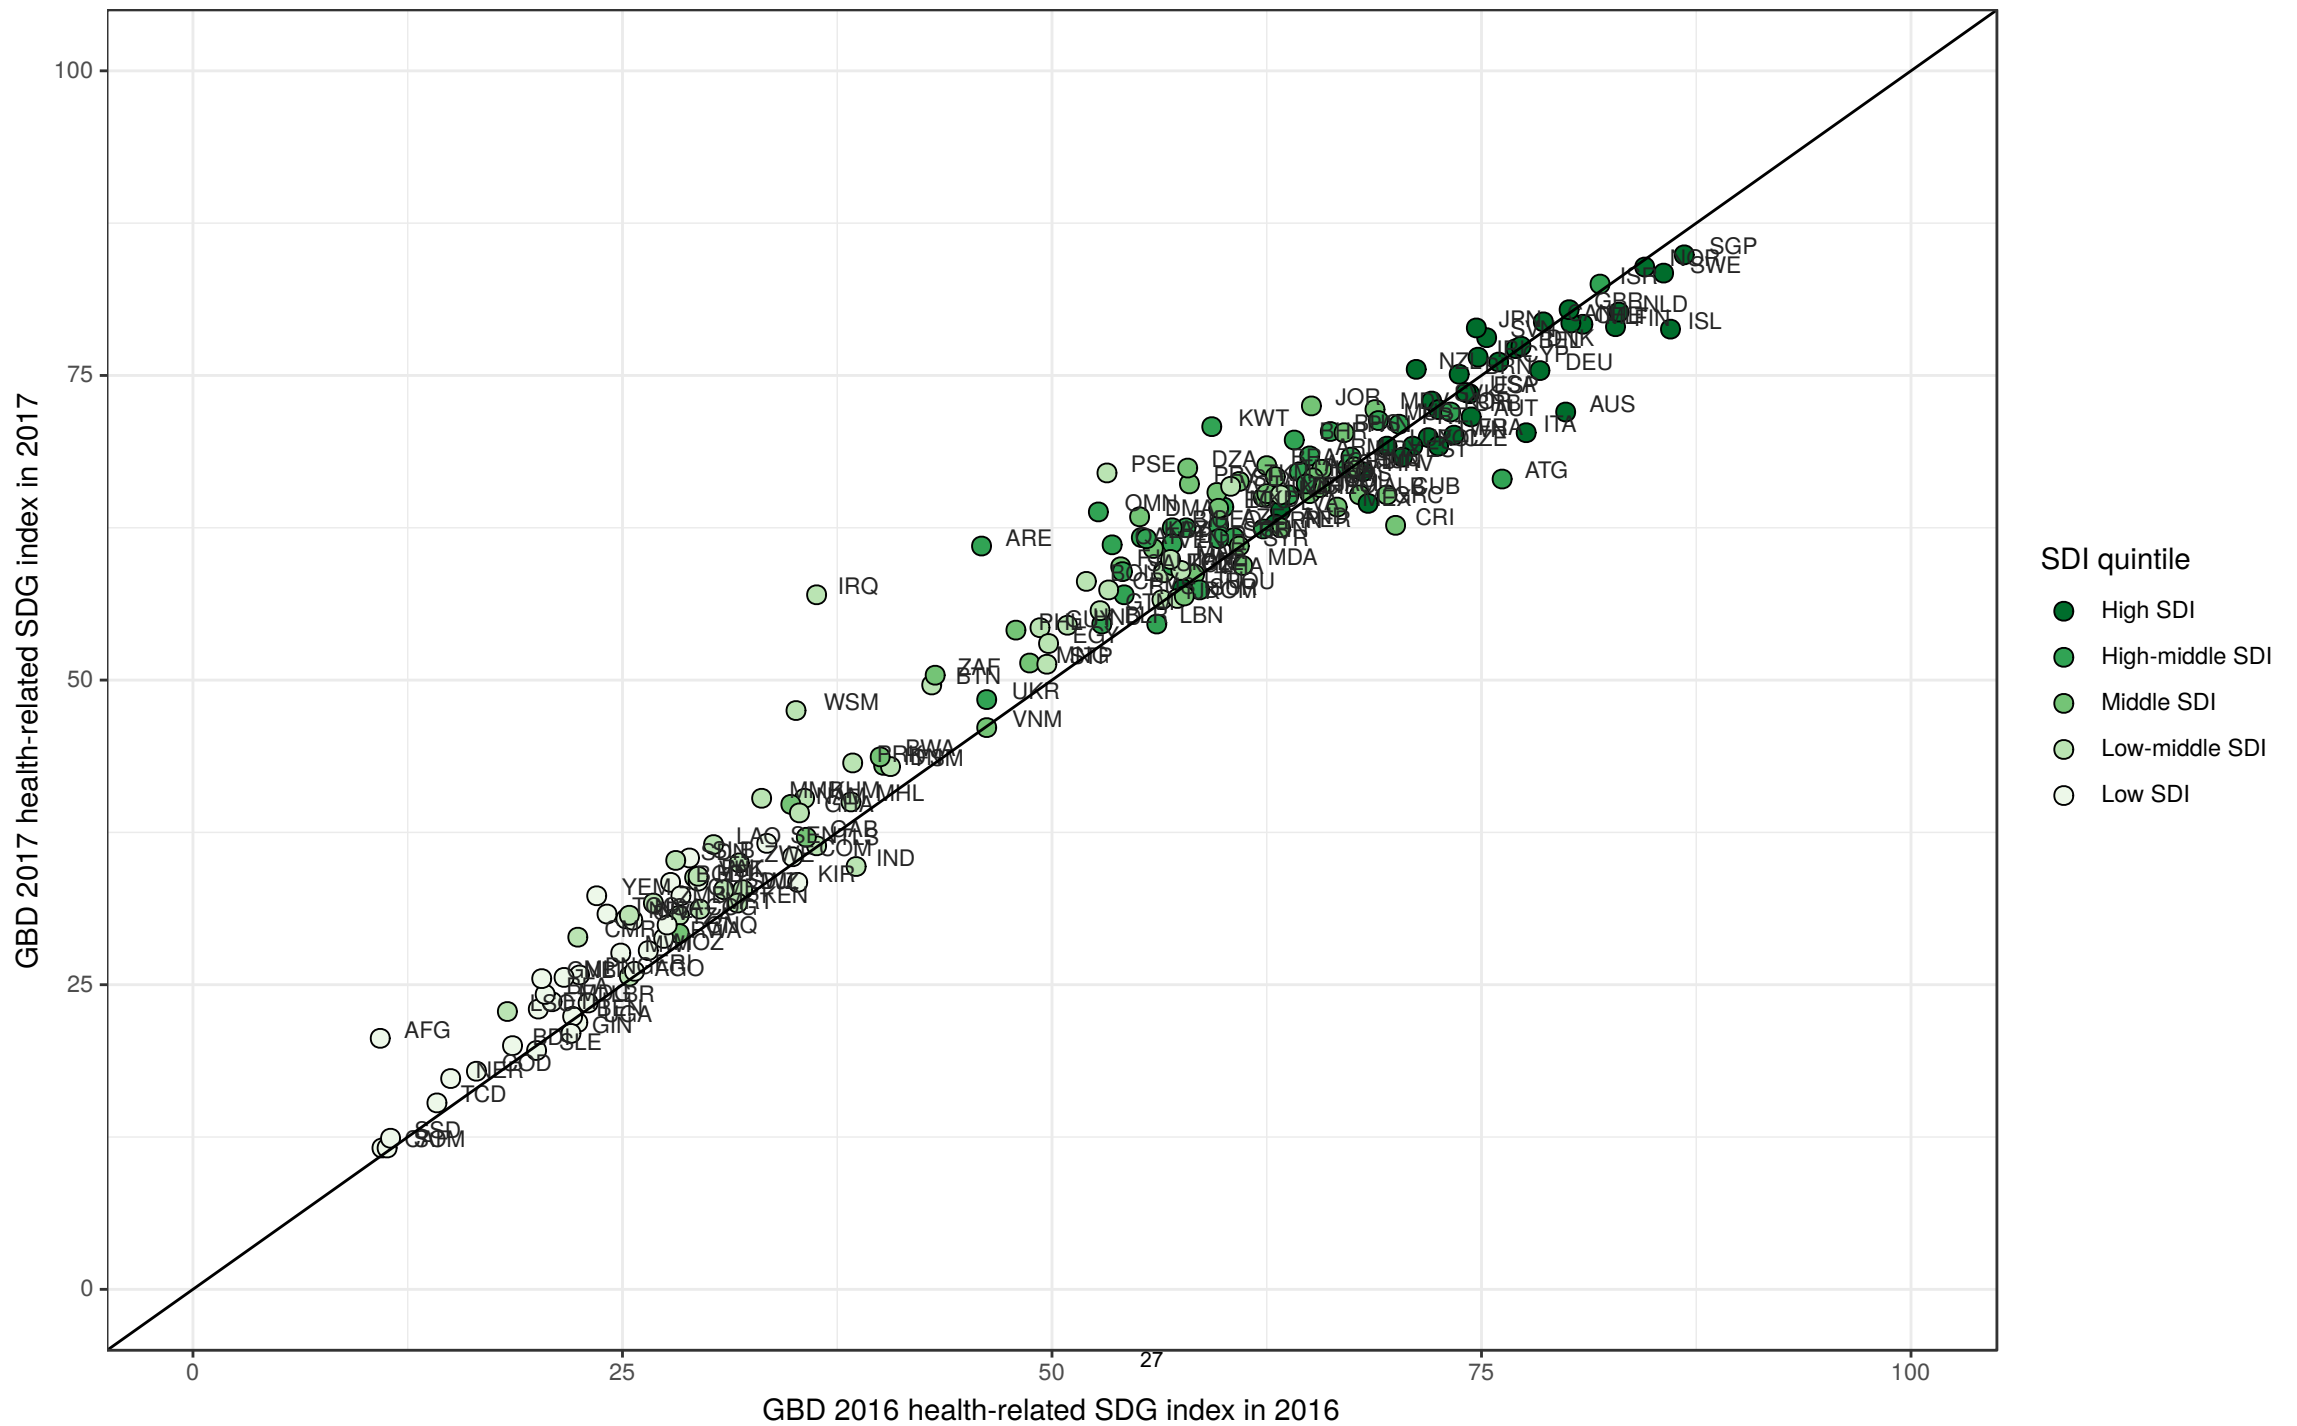



Supplementary figure 8. Comparing 2016 rankings on the health-related SDG index from GBD 2016 to 2017 rankings on the health-related SDG index from GBD 2017.

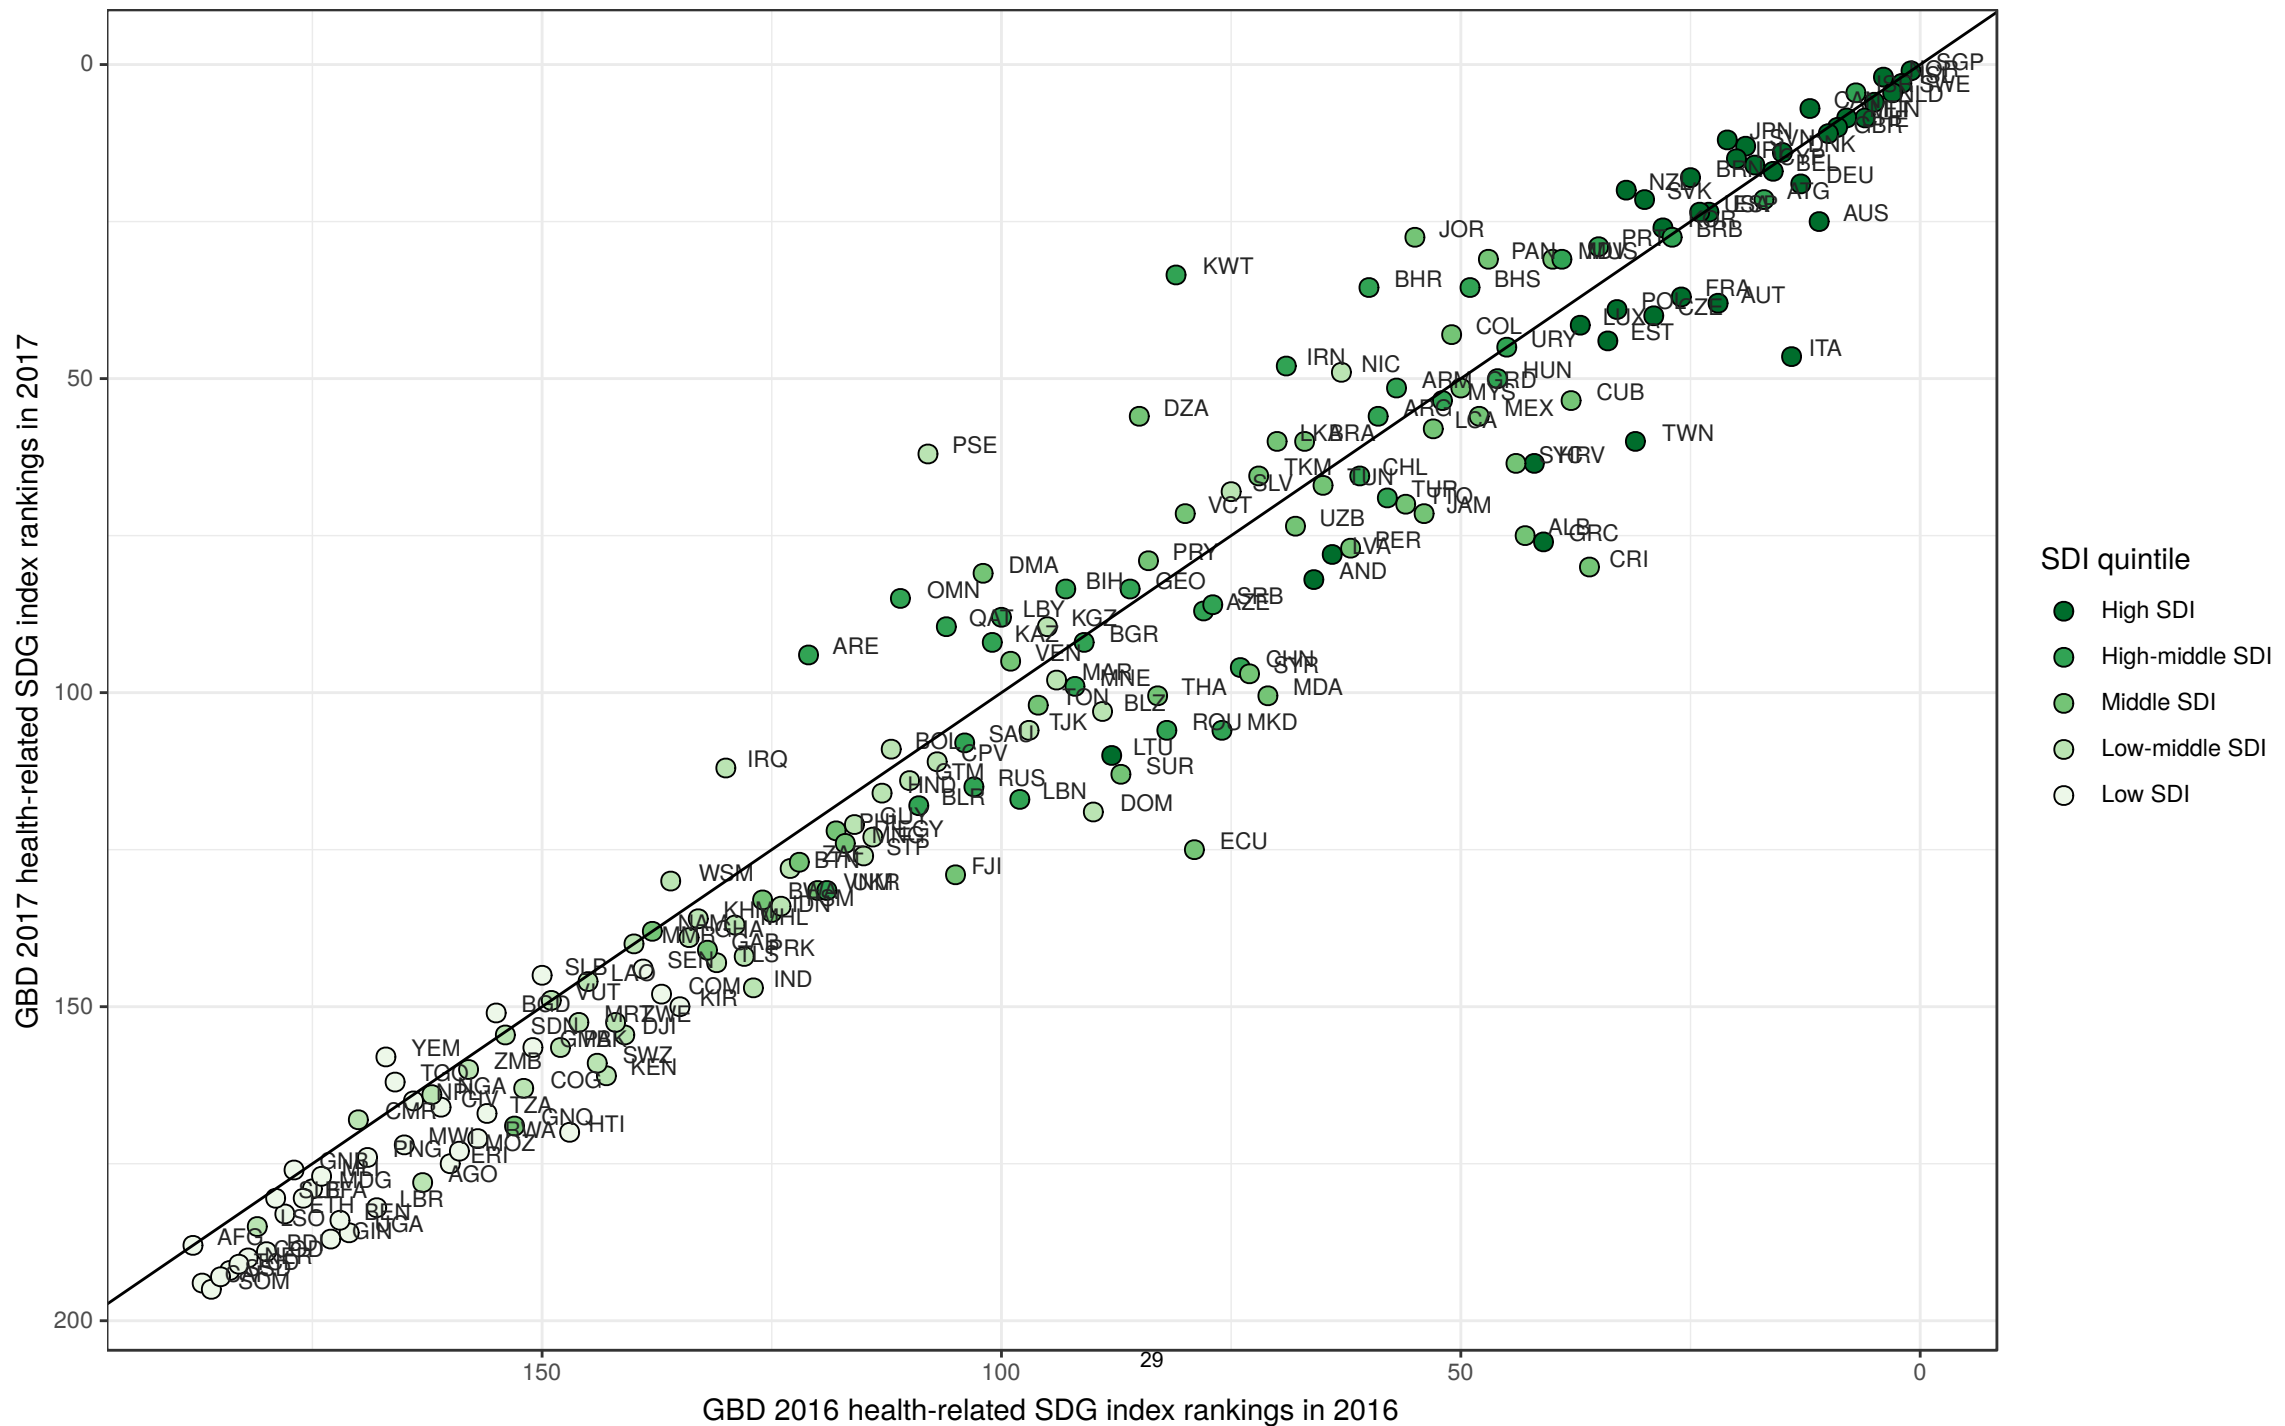

**Supplementary Table 1. Health-related SDG index in 2000, 2015, 2017, and 2030, by country or territory.**

|                                                  | SDG Index in 2000   | SDG Index in 2015   | SDG Index in 2017   | SDG Index in 2030   |
|--------------------------------------------------|---------------------|---------------------|---------------------|---------------------|
| Central Europe, Eastern Europe, and Central Asia |                     |                     |                     |                     |
| Central Asia                                     |                     |                     |                     |                     |
| Armenia                                          | 57.5 (55.2 to 59.2) | 66.8 (63.8 to 68.8) | 68.4 (65.4 to 70.6) | 67.5 (54.8 to 73.4) |
| Azerbaijan                                       | 43.3 (41.1 to 45.2) | 61.1 (58.3 to 63.4) | 62.7 (59.5 to 65.2) | 63.8 (59.4 to 67.9) |
| Georgia                                          | 57.8 (56.2 to 59.4) | 59.1 (56.8 to 60.9) | 62.5 (59.8 to 64.6) | 64.1 (59.7 to 68.5) |
| Kazakhstan                                       | 47.3 (44.9 to 49.2) | 59.5 (56.1 to 62.1) | 61.7 (57.9 to 64.6) | 64.3 (56.9 to 70.2) |
| Kyrgyzstan                                       | 47.4 (43.6 to 49.5) | 56.8 (53.6 to 58.9) | 58.8 (56.0 to 60.9) | 64.6 (54.9 to 69.0) |
| Mongolia                                         | 37.7 (34.6 to 40.0) | 52.7 (48.6 to 56.4) | 51.4 (47.7 to 54.8) | 55.4 (44.9 to 62.5) |
| Tajikistan                                       | 47.2 (41.3 to 50.1) | 56.6 (49.3 to 60.1) | 56.6 (49.2 to 60.2) | 60.7 (48.7 to 67.3) |
| Turkmenistan                                     | 55.4 (52.0 to 57.8) | 65.3 (61.6 to 68.0) | 66.3 (63.1 to 69.2) | 70.1 (64.2 to 74.8) |
| Uzbekistan                                       | 53.9 (49.0 to 56.5) | 63.7 (59.7 to 66.8) | 65.3 (61.3 to 68.6) | 69.5 (58.8 to 74.4) |
| Central Europe                                   |                     |                     |                     |                     |
| Albania                                          | 55.1 (53.5 to 56.4) | 64.3 (62.2 to 66.3) | 65.2 (62.8 to 67.2) | 66.0 (59.3 to 71.0) |
| Bosnia and Herzegovina                           | 56.7 (54.6 to 58.8) | 60.8 (57.4 to 63.7) | 62.5 (59.0 to 65.4) | 62.4 (56.1 to 68.9) |
| Bulgaria                                         | 50.7 (49.2 to 51.9) | 59.0 (55.3 to 62.6) | 61.2 (56.5 to 65.0) | 64.1 (56.2 to 69.5) |
| Croatia                                          | 61.0 (57.2 to 63.7) | 64.5 (60.2 to 68.0) | 67.1 (62.1 to 71.0) | 68.0 (61.7 to 74.7) |
| Czech Republic                                   | 60.9 (57.8 to 63.4) | 68.8 (61.7 to 72.2) | 69.2 (61.7 to 73.2) | 73.3 (66.4 to 77.5) |
| Hungary                                          | 53.7 (49.1 to 57.7) | 66.0 (61.2 to 68.7) | 67.4 (59.9 to 70.8) | 72.6 (67.4 to 76.4) |
| Macedonia                                        | 57.0 (51.9 to 59.9) | 60.5 (56.1 to 63.3) | 64.2 (59.3 to 67.3) | 62.8 (50.4 to 71.0) |
| Montenegro                                       | 53.8 (48.5 to 58.0) | 58.9 (54.0 to 63.5) | 59.4 (52.0 to 64.4) | 56.6 (46.7 to 65.1) |
| Poland                                           | 61.0 (58.9 to 62.8) | 68.6 (65.6 to 70.9) | 69.2 (64.7 to 72.0) | 73.4 (65.1 to 77.5) |
| Romania                                          | 49.8 (45.1 to 53.0) | 58.1 (54.8 to 63.7) | 57.4 (54.4 to 63.3) | 62.9 (57.2 to 70.3) |
| Serbia                                           | 54.1 (52.1 to 55.8) | 60.5 (54.0 to 63.8) | 61.6 (54.8 to 65.8) | 60.9 (53.8 to 68.0) |
| Slovakia                                         | 63.1 (60.2 to 65.3) | 72.5 (69.1 to 74.9) | 72.9 (67.5 to 75.8) | 75.0 (69.3 to 79.1) |
| Slovenia                                         | 69.7 (67.9 to 71.2) | 76.3 (73.6 to 78.2) | 78.1 (75.1 to 80.3) | 78.5 (74.6 to 82.4) |
| Eastern Europe                                   |                     |                     |                     |                     |
| Belarus                                          | 45.7 (41.4 to 48.4) | 53.9 (50.7 to 59.7) | 54.6 (50.4 to 60.9) | 53.6 (48.8 to 59.4) |
| Estonia                                          | 58.2 (56.2 to 59.9) | 68.4 (63.6 to 74.5) | 68.3 (63.9 to 75.8) | 68.7 (63.6 to 77.8) |
| Latvia                                           | 55.6 (53.2 to 57.8) | 63.5 (56.8 to 66.9) | 63.9 (57.3 to 68.4) | 64.6 (56.4 to 71.7) |
| Lithuania                                        | 55.8 (54.0 to 57.3) | 56.3 (53.6 to 61.6) | 57.5 (54.3 to 63.3) | 58.8 (54.5 to 63.7) |
| Moldova                                          | 46.3 (42.3 to 50.9) | 58.2 (53.0 to 60.9) | 59.4 (52.1 to 62.8) | 63.1 (54.7 to 68.5) |
| Russia                                           | 42.4 (40.9 to 43.6) | 54.3 (51.7 to 56.5) | 57.0 (52.7 to 59.7) | 61.5 (53.6 to 67.9) |

|                                  | SDG Index in 2000   | SDG Index in 2015   | SDG Index in 2017   | SDG Index in 2030   |
|----------------------------------|---------------------|---------------------|---------------------|---------------------|
| Ukraine                          | 43.4 (38.4 to 47.0) | 44.8 (42.6 to 48.3) | 48.4 (45.7 to 53.1) | 52.1 (46.4 to 58.5) |
| <b>High-income</b>               |                     |                     |                     |                     |
| <b>Australasia</b>               |                     |                     |                     |                     |
| Australia                        | 68.6 (65.4 to 71.8) | 71.9 (68.1 to 74.9) | 72.0 (65.7 to 75.3) | 72.5 (64.7 to 77.0) |
| New Zealand                      | 67.1 (65.2 to 68.8) | 72.5 (69.3 to 74.9) | 75.5 (71.2 to 78.2) | 70.4 (59.5 to 78.9) |
| <b>High-income Asia Pacific</b>  |                     |                     |                     |                     |
| Brunei                           | 69.0 (67.7 to 70.3) | 69.4 (68.1 to 70.7) | 75.1 (73.8 to 76.3) | 77.5 (73.8 to 79.8) |
| Japan                            | 69.0 (67.4 to 70.1) | 78.4 (76.6 to 79.8) | 78.9 (76.7 to 80.5) | 77.0 (66.6 to 81.0) |
| South Korea                      | 59.5 (57.6 to 60.9) | 71.3 (68.8 to 73.3) | 72.2 (69.0 to 74.4) | 72.6 (67.1 to 76.6) |
| Singapore                        | 77.5 (76.0 to 79.1) | 84.3 (82.4 to 85.9) | 84.9 (83.1 to 86.7) | 85.3 (81.7 to 88.0) |
| <b>High-income North America</b> |                     |                     |                     |                     |
| Canada                           | 73.0 (70.7 to 74.6) | 79.7 (76.3 to 81.7) | 79.4 (75.0 to 81.7) | 80.0 (73.6 to 83.6) |
| United States                    | 68.8 (67.5 to 69.9) | 72.7 (70.7 to 74.3) | 73.6 (70.9 to 75.4) | 74.2 (70.6 to 77.0) |
| Greenland                        | 48.6 (46.7 to 50.4) | 53.7 (51.7 to 55.2) | 54.2 (52.3 to 55.8) | 55.7 (52.3 to 58.3) |
| <b>Southern Latin America</b>    |                     |                     |                     |                     |
| Argentina                        | 57.1 (54.1 to 59.1) | 65.5 (62.2 to 67.6) | 67.1 (63.1 to 69.6) | 69.7 (64.6 to 73.0) |
| Chile                            | 54.2 (52.4 to 57.1) | 60.6 (57.7 to 63.0) | 65.2 (61.8 to 68.1) | 65.6 (55.0 to 71.9) |
| Uruguay                          | 54.0 (48.5 to 60.5) | 66.3 (63.5 to 68.1) | 68.3 (65.6 to 70.6) | 72.4 (68.9 to 75.1) |
| <b>Western Europe</b>            |                     |                     |                     |                     |
| Andorra                          | 52.3 (50.1 to 62.8) | 62.9 (57.7 to 66.0) | 62.8 (55.6 to 66.5) | 64.9 (60.5 to 68.4) |
| Austria                          | 58.5 (52.3 to 62.8) | 68.5 (61.5 to 72.8) | 71.6 (64.4 to 76.9) | 74.0 (65.4 to 79.5) |
| Belgium                          | 68.4 (66.2 to 70.1) | 76.8 (70.7 to 79.7) | 77.2 (67.9 to 80.8) | 78.7 (69.4 to 83.3) |
| Cyprus                           | 64.5 (59.9 to 67.0) | 75.4 (73.1 to 77.4) | 76.1 (73.4 to 78.3) | 77.3 (70.9 to 81.3) |
| Denmark                          | 64.5 (58.3 to 69.1) | 76.8 (67.7 to 80.7) | 77.4 (68.2 to 81.7) | 81.7 (75.1 to 85.5) |
| Finland                          | 70.7 (67.5 to 72.8) | 79.6 (70.7 to 83.2) | 79.0 (70.2 to 83.4) | 81.4 (72.1 to 85.4) |
| France                           | 57.7 (54.7 to 63.2) | 68.6 (61.2 to 73.1) | 70.1 (62.2 to 75.1) | 70.1 (61.9 to 75.9) |
| Germany                          | 67.2 (60.3 to 70.4) | 74.8 (66.2 to 78.4) | 75.4 (66.9 to 79.7) | 79.2 (72.9 to 82.9) |
| Greece                           | 59.5 (57.1 to 61.4) | 63.1 (57.2 to 68.1) | 64.5 (56.9 to 69.3) | 69.7 (61.9 to 76.1) |
| Iceland                          | 78.3 (75.8 to 79.8) | 82.8 (79.2 to 84.9) | 78.8 (75.0 to 81.0) | 79.9 (70.6 to 85.3) |
| Ireland                          | 62.7 (58.8 to 67.8) | 75.7 (68.6 to 81.1) | 76.5 (69.7 to 83.0) | 80.2 (70.7 to 85.8) |
| Israel                           | 73.2 (71.4 to 74.7) | 81.9 (78.9 to 83.3) | 82.5 (79.4 to 84.0) | 83.4 (78.1 to 86.5) |
| Italy                            | 60.4 (56.7 to 63.0) | 69.9 (66.9 to 72.4) | 70.3 (66.4 to 73.0) | 71.9 (63.2 to 76.2) |
| Luxembourg                       | 64.7 (59.7 to 67.5) | 68.3 (65.3 to 73.1) | 69.2 (65.8 to 76.4) | 70.9 (66.6 to 79.9) |



|                                  | SDG Index in 2000   | SDG Index in 2015   | SDG Index in 2017   | SDG Index in 2030   |
|----------------------------------|---------------------|---------------------|---------------------|---------------------|
| Malta                            | 74.3 (72.7 to 75.7) | 79.4 (77.2 to 81.0) | 79.2 (76.7 to 81.1) | 80.3 (75.7 to 83.6) |
| Netherlands                      | 71.5 (69.4 to 72.9) | 79.9 (77.3 to 81.6) | 80.2 (77.0 to 82.3) | 80.4 (67.0 to 84.1) |
| Norway                           | 71.5 (69.4 to 73.1) | 80.3 (77.6 to 82.0) | 83.9 (81.0 to 85.9) | 84.0 (79.1 to 86.9) |
| Portugal                         | 60.2 (57.2 to 66.3) | 70.8 (65.5 to 76.6) | 71.0 (66.0 to 77.6) | 74.7 (66.5 to 80.4) |
| Spain                            | 64.2 (59.7 to 68.8) | 71.7 (66.2 to 78.0) | 73.5 (68.1 to 80.4) | 76.5 (68.3 to 83.1) |
| Sweden                           | 77.0 (74.1 to 78.9) | 82.7 (79.1 to 85.0) | 83.4 (78.5 to 86.2) | 83.9 (77.9 to 87.2) |
| Switzerland                      | 67.6 (64.0 to 69.8) | 75.5 (71.2 to 78.0) | 79.3 (73.6 to 82.2) | 79.5 (74.4 to 83.1) |
| United Kingdom                   | 70.6 (68.8 to 72.0) | 79.2 (76.7 to 81.0) | 80.4 (77.3 to 82.5) | 81.5 (76.4 to 84.5) |
| Latin America and Caribbean      |                     |                     |                     |                     |
| Andean Latin America             |                     |                     |                     |                     |
| Bolivia                          | 41.8 (39.7 to 43.7) | 55.0 (52.4 to 57.6) | 58.1 (55.3 to 61.0) | 61.8 (57.0 to 65.8) |
| Ecuador                          | 50.8 (49.5 to 52.0) | 60.7 (59.2 to 62.1) | 64.1 (62.3 to 65.9) | 64.7 (55.2 to 68.7) |
| Peru                             | 49.7 (47.3 to 51.6) | 62.5 (59.9 to 64.6) | 62.5 (59.6 to 64.9) | 65.4 (55.4 to 71.5) |
| Caribbean                        |                     |                     |                     |                     |
| Antigua and Barbuda              | 69.5 (67.4 to 71.0) | 72.6 (70.7 to 74.3) | 66.5 (64.4 to 68.4) | 73.6 (68.6 to 77.7) |
| The Bahamas                      | 65.2 (62.7 to 67.1) | 56.6 (54.7 to 58.1) | 70.4 (68.1 to 72.5) | 70.8 (64.9 to 75.3) |
| Barbados                         | 66.6 (64.4 to 68.5) | 71.8 (69.4 to 73.7) | 72.0 (69.8 to 74.0) | 72.5 (60.4 to 76.8) |
| Belize                           | 40.3 (37.5 to 41.9) | 58.1 (55.3 to 60.4) | 59.0 (56.2 to 61.3) | 59.4 (49.4 to 66.0) |
| Cuba                             | 60.7 (58.3 to 62.9) | 65.6 (63.3 to 67.9) | 65.2 (62.8 to 67.6) | 65.8 (54.9 to 70.3) |
| Dominica                         | 58.4 (56.6 to 59.9) | 51.2 (49.7 to 52.5) | 63.4 (61.2 to 65.1) | 63.1 (53.0 to 68.1) |
| Dominican Republic               | 49.5 (47.7 to 51.2) | 55.0 (52.9 to 56.8) | 56.7 (54.3 to 59.0) | 59.9 (51.3 to 64.3) |
| Grenada                          | 63.2 (60.9 to 64.9) | 67.0 (64.8 to 68.7) | 67.3 (64.9 to 69.2) | 69.3 (57.6 to 73.3) |
| Guyana                           | 46.1 (43.5 to 47.9) | 52.8 (49.9 to 55.2) | 54.3 (51.0 to 57.1) | 58.4 (52.1 to 62.5) |
| Haiti                            | 20.4 (18.2 to 23.1) | 32.4 (28.7 to 35.5) | 33.5 (29.7 to 36.5) | 36.3 (30.0 to 42.2) |
| Jamaica                          | 59.0 (57.5 to 60.8) | 64.5 (62.2 to 66.8) | 65.5 (63.1 to 68.0) | 65.7 (60.0 to 69.4) |
| Saint Lucia                      | 58.3 (56.4 to 60.0) | 66.3 (64.1 to 68.0) | 66.6 (64.4 to 68.4) | 69.6 (63.0 to 73.8) |
| Saint Vincent and the Grenadines | 59.9 (57.7 to 61.6) | 64.7 (62.6 to 66.5) | 65.4 (63.0 to 67.3) | 65.3 (54.6 to 71.2) |
| Suriname                         | 49.3 (47.1 to 51.2) | 55.9 (53.0 to 58.2) | 56.9 (54.0 to 59.3) | 60.6 (56.0 to 64.5) |
| Trinidad and Tobago              | 59.0 (56.2 to 60.9) | 65.2 (62.1 to 67.7) | 65.3 (62.1 to 68.0) | 66.1 (60.1 to 70.2) |
| Bermuda                          | 48.8 (44.3 to 53.7) | 69.8 (62.8 to 72.7) | 70.2 (62.9 to 73.3) | 75.7 (69.2 to 80.4) |
| Puerto Rico                      | 63.1 (59.7 to 66.0) | 67.8 (65.0 to 71.1) | 54.4 (52.0 to 57.4) | 67.3 (56.5 to 72.0) |
| Virgin Islands, U.S.             | 65.1 (62.1 to 67.5) | 68.6 (65.4 to 71.2) | 55.8 (53.1 to 58.1) | 70.6 (65.2 to 75.0) |
| Central Latin America            |                     |                     |                     |                     |

|                                     | SDG Index in 2000   | SDG Index in 2015   | SDG Index in 2017   | SDG Index in 2030   |
|-------------------------------------|---------------------|---------------------|---------------------|---------------------|
| Colombia                            | 53.6 (51.8 to 55.2) | 65.5 (63.4 to 67.3) | 65.8 (63.2 to 68.1) | 70.7 (60.3 to 75.4) |
| Costa Rica                          | 58.1 (56.6 to 59.3) | 65.9 (64.4 to 67.2) | 62.7 (61.0 to 64.1) | 66.7 (63.3 to 69.7) |
| El Salvador                         | 52.4 (50.4 to 53.8) | 62.2 (60.2 to 63.8) | 65.9 (63.6 to 67.9) | 64.3 (54.3 to 70.5) |
| Guatemala                           | 40.1 (38.5 to 41.4) | 55.4 (53.5 to 57.1) | 55.7 (53.5 to 57.8) | 61.1 (51.2 to 66.4) |
| Honduras                            | 41.2 (38.5 to 47.4) | 54.5 (47.2 to 58.2) | 54.5 (47.0 to 57.8) | 57.6 (49.0 to 65.0) |
| Mexico                              | 58.5 (57.5 to 59.5) | 66.8 (65.7 to 67.8) | 64.2 (62.9 to 65.4) | 70.6 (66.4 to 73.2) |
| Nicaragua                           | 49.8 (43.4 to 51.6) | 65.0 (63.2 to 66.6) | 65.2 (63.3 to 66.9) | 67.4 (57.9 to 74.2) |
| Panama                              | 63.0 (61.7 to 64.1) | 69.2 (67.9 to 70.4) | 70.3 (68.7 to 71.7) | 73.3 (70.2 to 76.0) |
| Venezuela                           | 50.6 (48.8 to 52.2) | 60.0 (57.9 to 61.8) | 60.8 (58.2 to 63.0) | 61.8 (51.2 to 66.8) |
| <b>Tropical Latin America</b>       |                     |                     |                     |                     |
| Brazil                              | 56.1 (55.1 to 57.1) | 66.3 (64.8 to 67.4) | 67.6 (65.7 to 68.9) | 69.8 (66.9 to 73.3) |
| Paraguay                            | 51.2 (49.6 to 52.6) | 62.5 (60.7 to 64.3) | 66.1 (63.6 to 68.5) | 70.0 (65.8 to 73.5) |
| <b>North Africa and Middle East</b> |                     |                     |                     |                     |
| <b>North Africa and Middle East</b> |                     |                     |                     |                     |
| Algeria                             | 51.7 (45.9 to 54.5) | 65.0 (58.1 to 68.1) | 67.4 (58.2 to 70.9) | 68.0 (57.0 to 75.6) |
| Bahrain                             | 59.2 (53.5 to 62.2) | 69.0 (62.9 to 73.0) | 69.7 (63.3 to 73.7) | 73.1 (66.1 to 79.3) |
| Egypt                               | 46.7 (41.4 to 51.1) | 51.0 (46.6 to 57.4) | 53.0 (48.3 to 59.6) | 57.2 (50.8 to 66.0) |
| Iran                                | 54.0 (50.8 to 55.5) | 65.0 (63.9 to 65.9) | 62.4 (61.0 to 63.6) | 62.7 (55.7 to 70.8) |
| Iraq                                | 41.8 (36.8 to 45.0) | 53.8 (48.0 to 57.8) | 57.0 (50.7 to 60.7) | 64.1 (55.8 to 70.5) |
| Jordan                              | 58.7 (56.7 to 60.3) | 71.9 (69.0 to 73.8) | 72.5 (69.7 to 74.3) | 75.1 (64.0 to 79.2) |
| Kuwait                              | 63.9 (57.1 to 67.3) | 68.4 (61.1 to 72.9) | 70.8 (63.0 to 74.8) | 72.4 (64.2 to 77.6) |
| Lebanon                             | 47.3 (45.7 to 48.7) | 52.5 (50.9 to 54.0) | 54.6 (53.0 to 56.1) | 56.8 (48.0 to 60.8) |
| Libya                               | 57.8 (49.9 to 62.0) | 63.1 (54.1 to 68.3) | 61.6 (53.3 to 66.9) | 65.4 (54.8 to 73.6) |
| Morocco                             | 44.9 (41.4 to 46.9) | 58.8 (55.7 to 61.4) | 59.9 (56.4 to 62.7) | 62.1 (50.9 to 67.6) |
| Palestine                           | 52.2 (50.2 to 53.8) | 63.3 (60.6 to 65.1) | 67.0 (64.3 to 68.9) | 70.1 (63.9 to 74.4) |
| Oman                                | 51.1 (47.1 to 53.2) | 61.6 (54.6 to 66.9) | 63.8 (56.9 to 68.7) | 69.2 (59.4 to 75.4) |
| Qatar                               | 43.7 (39.5 to 48.2) | 60.2 (56.5 to 66.7) | 61.1 (57.2 to 67.7) | 64.9 (59.9 to 72.6) |
| Saudi Arabia                        | 52.3 (47.0 to 57.7) | 57.2 (51.4 to 65.3) | 58.9 (52.9 to 66.3) | 66.1 (60.0 to 75.3) |
| Syria                               | 56.5 (51.5 to 58.7) | 58.1 (50.9 to 60.8) | 61.0 (53.1 to 63.7) | 66.4 (56.8 to 71.9) |
| Tunisia                             | 56.0 (52.7 to 58.4) | 65.6 (61.7 to 68.5) | 66.7 (62.5 to 69.8) | 68.9 (59.9 to 74.4) |
| Turkey                              | 48.0 (46.0 to 49.8) | 64.0 (60.5 to 66.2) | 66.1 (62.8 to 68.3) | 67.6 (56.8 to 73.8) |
| United Arab Emirates                | 52.5 (48.5 to 57.0) | 60.0 (54.2 to 65.9) | 61.0 (55.2 to 67.0) | 67.6 (58.7 to 73.6) |
| Yemen                               | 18.4 (15.2 to 21.7) | 31.6 (26.7 to 35.1) | 32.3 (27.4 to 35.8) | 39.0 (31.8 to 44.4) |

|                                               | SDG Index in 2000   | SDG Index in 2015   | SDG Index in 2017   | SDG Index in 2030   |
|-----------------------------------------------|---------------------|---------------------|---------------------|---------------------|
| Afghanistan                                   | 6.8 (5.5 to 8.3)    | 18.3 (15.6 to 20.8) | 20.6 (17.6 to 23.1) | 25.5 (20.2 to 30.0) |
| Sudan                                         | 19.1 (16.3 to 21.6) | 32.9 (28.2 to 36.1) | 35.2 (30.5 to 38.4) | 41.7 (35.6 to 46.5) |
| <b>South Asia</b>                             |                     |                     |                     |                     |
| South Asia                                    |                     |                     |                     |                     |
| Bangladesh                                    | 18.3 (15.7 to 20.3) | 31.6 (28.3 to 34.0) | 33.4 (30.0 to 35.6) | 35.7 (29.6 to 41.7) |
| Bhutan                                        | 22.6 (20.9 to 24.4) | 48.1 (45.5 to 50.0) | 49.6 (46.8 to 51.7) | 55.0 (45.7 to 59.2) |
| India                                         | 22.3 (20.7 to 24.2) | 33.7 (32.2 to 36.3) | 34.7 (33.2 to 37.7) | 40.5 (38.5 to 44.7) |
| Nepal                                         | 15.4 (13.7 to 17.2) | 24.9 (22.1 to 28.1) | 30.4 (27.3 to 34.3) | 37.4 (31.2 to 42.9) |
| Pakistan                                      | 22.1 (19.4 to 24.1) | 30.8 (27.0 to 33.4) | 33.9 (30.0 to 36.5) | 38.7 (30.5 to 43.6) |
| <b>Southeast Asia, East Asia, and Oceania</b> |                     |                     |                     |                     |
| East Asia                                     |                     |                     |                     |                     |
| China                                         | 45.9 (44.6 to 47.1) | 59.1 (57.7 to 60.5) | 61.7 (60.5 to 62.9) | 65.4 (55.5 to 68.4) |
| North Korea                                   | 32.7 (30.6 to 34.6) | 40.9 (38.9 to 42.7) | 43.2 (41.1 to 45.2) | 45.1 (41.4 to 48.0) |
| Taiwan (Province of China)                    | 61.1 (59.5 to 62.5) | 69.4 (67.0 to 71.1) | 69.9 (67.4 to 71.9) | 67.4 (58.5 to 72.1) |
| Oceania                                       |                     |                     |                     |                     |
| Fiji                                          | 45.6 (44.0 to 47.3) | 58.4 (55.4 to 61.0) | 59.3 (55.9 to 62.2) | 60.0 (54.7 to 64.5) |
| Kiribati                                      | 26.5 (23.7 to 28.4) | 32.5 (29.9 to 34.8) | 33.4 (30.7 to 36.0) | 37.7 (33.7 to 41.5) |
| Marshall Islands                              | 33.0 (31.2 to 34.6) | 39.1 (37.0 to 41.1) | 40.0 (37.7 to 42.7) | 44.8 (40.6 to 48.6) |
| Federated States of Micronesia                | 36.7 (33.8 to 39.1) | 34.5 (31.7 to 37.3) | 42.9 (39.4 to 46.5) | 43.7 (35.5 to 48.6) |
| Papua New Guinea                              | 14.9 (13.0 to 17.1) | 24.3 (21.1 to 27.1) | 25.8 (22.6 to 28.7) | 29.2 (23.6 to 33.9) |
| Samoa                                         | 43.5 (41.7 to 45.3) | 46.8 (44.9 to 48.7) | 47.5 (45.6 to 49.5) | 46.9 (39.6 to 52.5) |
| Solomon Islands                               | 27.0 (23.2 to 29.5) | 30.5 (27.7 to 32.9) | 35.4 (32.2 to 38.1) | 36.6 (31.0 to 42.1) |
| Tonga                                         | 51.2 (49.1 to 53.0) | 58.2 (56.2 to 60.0) | 59.0 (57.0 to 61.0) | 61.6 (56.9 to 65.5) |
| Vanuatu                                       | 27.5 (24.1 to 31.1) | 26.8 (24.2 to 29.6) | 33.8 (30.5 to 37.3) | 35.6 (29.5 to 41.0) |
| American Samoa                                | 57.3 (55.5 to 59.2) | 60.7 (58.8 to 62.6) | 61.2 (59.2 to 63.0) | 63.0 (52.1 to 69.0) |
| Guam                                          | 59.0 (56.4 to 61.3) | 58.3 (56.8 to 60.4) | 58.5 (56.9 to 60.6) | 62.6 (56.6 to 66.2) |
| Northern Mariana Islands                      | 63.5 (60.9 to 65.4) | 64.6 (62.4 to 66.5) | 65.0 (62.8 to 67.0) | 69.5 (64.4 to 72.6) |
| <b>Southeast Asia</b>                         |                     |                     |                     |                     |
| Cambodia                                      | 16.0 (14.4 to 17.7) | 39.0 (37.0 to 40.6) | 40.3 (38.4 to 41.9) | 46.4 (42.7 to 49.5) |
| Indonesia                                     | 32.6 (31.6 to 33.6) | 42.0 (41.1 to 43.0) | 43.0 (42.0 to 44.0) | 46.2 (39.1 to 48.8) |
| Laos                                          | 14.8 (12.9 to 16.5) | 34.8 (32.9 to 36.8) | 36.5 (34.4 to 38.5) | 43.8 (39.4 to 47.0) |
| Malaysia                                      | 57.0 (55.7 to 58.4) | 64.5 (63.0 to 66.2) | 66.3 (64.4 to 68.2) | 71.1 (67.2 to 74.8) |
| Maldives                                      | 49.0 (47.4 to 50.4) | 70.2 (68.8 to 71.5) | 72.2 (70.8 to 73.5) | 78.0 (64.6 to 81.2) |

|                                    | SDG Index in 2000   | SDG Index in 2015   | SDG Index in 2017   | SDG Index in 2030   |
|------------------------------------|---------------------|---------------------|---------------------|---------------------|
| Myanmar                            | 23.7 (20.8 to 25.7) | 36.3 (34.5 to 38.0) | 40.3 (38.4 to 42.1) | 44.8 (37.2 to 48.5) |
| Philippines                        | 44.2 (43.0 to 45.5) | 52.4 (50.7 to 53.9) | 54.1 (52.2 to 56.1) | 56.1 (48.0 to 60.1) |
| Sri Lanka                          | 45.3 (44.0 to 46.6) | 62.6 (60.5 to 64.4) | 65.0 (62.1 to 67.6) | 69.4 (58.1 to 75.5) |
| Thailand                           | 45.3 (43.2 to 47.2) | 59.6 (57.8 to 61.1) | 58.7 (57.0 to 60.5) | 65.2 (59.7 to 68.7) |
| Timor-Leste                        | 15.3 (12.8 to 17.5) | 34.7 (32.5 to 37.3) | 36.4 (34.1 to 38.9) | 43.1 (39.4 to 46.4) |
| Vietnam                            | 35.3 (33.6 to 36.8) | 46.0 (43.6 to 48.0) | 46.1 (43.5 to 48.3) | 50.0 (43.6 to 54.3) |
| Mauritius                          | 63.5 (62.0 to 64.9) | 70.3 (68.4 to 72.0) | 71.3 (69.4 to 73.1) | 73.6 (68.9 to 76.9) |
| Seychelles                         | 60.8 (59.2 to 62.3) | 66.0 (64.0 to 67.6) | 67.5 (65.4 to 69.2) | 71.2 (66.1 to 74.6) |
| <b>Sub-Saharan Africa</b>          |                     |                     |                     |                     |
| <b>Central Sub-Saharan Africa</b>  |                     |                     |                     |                     |
| Angola                             | 8.0 (6.7 to 9.6)    | 23.4 (21.4 to 25.0) | 25.7 (23.6 to 27.5) | 32.5 (27.9 to 35.5) |
| Central African Republic           | 6.8 (5.7 to 7.9)    | 11.0 (9.1 to 13.2)  | 11.6 (9.6 to 14.0)  | 14.6 (11.6 to 17.6) |
| Congo                              | 15.3 (12.9 to 17.3) | 30.2 (26.2 to 32.9) | 30.7 (26.4 to 33.4) | 35.2 (29.1 to 39.7) |
| Democratic Republic of the Congo   | 9.4 (7.9 to 11.2)   | 17.5 (15.0 to 19.3) | 17.9 (15.6 to 19.7) | 24.4 (20.8 to 27.3) |
| Equatorial Guinea                  | 11.9 (9.1 to 14.4)  | 27.3 (23.0 to 30.6) | 29.2 (25.0 to 32.5) | 36.1 (30.7 to 39.9) |
| Gabon                              | 21.8 (18.9 to 23.5) | 35.8 (31.0 to 38.3) | 37.1 (31.8 to 39.6) | 41.2 (34.8 to 45.1) |
| <b>Eastern Sub-Saharan Africa</b>  |                     |                     |                     |                     |
| Burundi                            | 8.3 (6.9 to 9.8)    | 18.5 (16.0 to 20.7) | 20.0 (17.3 to 22.2) | 25.1 (21.0 to 28.4) |
| Comoros                            | 21.1 (18.8 to 23.0) | 33.6 (31.6 to 35.2) | 35.5 (33.4 to 37.1) | 40.0 (33.0 to 43.5) |
| Djibouti                           | 19.0 (15.7 to 22.0) | 31.2 (26.6 to 34.5) | 32.8 (28.1 to 35.9) | 36.6 (29.5 to 42.0) |
| Eritrea                            | 12.5 (10.4 to 14.7) | 24.3 (20.5 to 27.0) | 26.1 (22.4 to 29.0) | 30.4 (25.1 to 34.5) |
| Ethiopia                           | 6.4 (5.8 to 7.0)    | 21.4 (19.2 to 22.8) | 23.0 (20.7 to 24.3) | 31.8 (28.6 to 33.9) |
| Kenya                              | 21.9 (20.9 to 23.0) | 30.2 (29.1 to 31.3) | 31.7 (30.6 to 32.9) | 36.5 (34.7 to 38.3) |
| Madagascar                         | 13.7 (12.3 to 15.4) | 22.4 (19.7 to 25.2) | 23.6 (20.8 to 26.3) | 31.2 (28.1 to 34.3) |
| Malawi                             | 14.3 (12.5 to 16.3) | 23.0 (20.9 to 25.0) | 27.6 (25.2 to 29.4) | 31.5 (28.4 to 34.0) |
| Mozambique                         | 8.9 (8.0 to 10.1)   | 24.3 (21.3 to 26.5) | 27.8 (24.8 to 30.1) | 34.2 (29.8 to 37.9) |
| Rwanda                             | 9.2 (8.0 to 10.6)   | 27.8 (24.6 to 30.2) | 28.8 (25.4 to 31.0) | 34.0 (28.7 to 37.8) |
| Somalia                            | 6.3 (5.2 to 7.6)    | 11.1 (9.2 to 13.4)  | 11.6 (9.6 to 14.0)  | 15.5 (12.5 to 18.7) |
| Tanzania                           | 17.7 (15.9 to 19.4) | 27.8 (25.5 to 29.3) | 29.9 (27.8 to 31.5) | 35.1 (30.3 to 37.8) |
| Uganda                             | 10.0 (8.8 to 11.3)  | 20.8 (18.3 to 24.2) | 21.9 (19.0 to 25.5) | 29.0 (23.2 to 33.5) |
| Zambia                             | 17.4 (15.7 to 18.7) | 30.4 (28.7 to 31.9) | 31.7 (29.6 to 33.3) | 36.1 (31.5 to 39.0) |
| South Sudan                        | 6.9 (5.6 to 8.2)    | 12.4 (10.1 to 14.7) | 12.4 (10.2 to 14.6) | 17.2 (14.2 to 19.8) |
| <b>Southern Sub-Saharan Africa</b> |                     |                     |                     |                     |

|                                   | <b>SDG Index in 2000</b> | <b>SDG Index in 2015</b> | <b>SDG Index in 2017</b> | <b>SDG Index in 2030</b> |
|-----------------------------------|--------------------------|--------------------------|--------------------------|--------------------------|
| Botswana                          | 31.6 (29.6 to 33.2)      | 42.0 (40.1 to 43.5)      | 43.7 (42.0 to 45.3)      | 47.4 (42.8 to 50.3)      |
| Lesotho                           | 17.1 (14.5 to 19.3)      | 20.5 (17.3 to 23.8)      | 22.8 (19.6 to 26.1)      | 25.2 (20.0 to 30.5)      |
| Namibia                           | 26.0 (24.1 to 27.7)      | 38.4 (35.8 to 40.4)      | 39.8 (36.9 to 42.1)      | 43.8 (37.9 to 47.8)      |
| South Africa                      | 31.9 (31.1 to 32.6)      | 49.2 (47.7 to 50.5)      | 50.4 (48.9 to 51.8)      | 52.8 (44.9 to 57.0)      |
| Swaziland                         | 21.4 (18.4 to 24.1)      | 30.2 (26.3 to 33.3)      | 32.8 (29.6 to 35.2)      | 36.4 (29.7 to 40.9)      |
| Zimbabwe                          | 26.4 (24.4 to 28.6)      | 32.3 (29.6 to 35.1)      | 35.0 (31.9 to 37.9)      | 35.6 (27.1 to 42.3)      |
| <b>Western Sub-Saharan Africa</b> |                          |                          |                          |                          |
| Benin                             | 12.9 (11.3 to 15.0)      | 21.3 (18.3 to 23.5)      | 22.4 (19.5 to 24.8)      | 28.8 (23.8 to 34.3)      |
| Burkina Faso                      | 12.3 (10.4 to 13.8)      | 22.8 (20.0 to 25.4)      | 24.2 (21.2 to 26.8)      | 31.7 (27.0 to 34.9)      |
| Cameroon                          | 16.6 (14.5 to 18.4)      | 27.0 (23.8 to 30.1)      | 28.9 (25.5 to 32.2)      | 34.4 (28.6 to 38.9)      |
| Cape Verde                        | 40.0 (37.3 to 42.0)      | 49.0 (44.1 to 51.9)      | 57.4 (54.3 to 59.5)      | 62.9 (54.5 to 67.1)      |
| Chad                              | 7.2 (6.2 to 8.6)         | 14.0 (11.7 to 16.2)      | 15.3 (12.8 to 17.7)      | 21.1 (17.8 to 24.3)      |
| Cote d'Ivoire                     | 21.0 (19.2 to 22.6)      | 28.4 (26.1 to 30.1)      | 30.3 (28.2 to 32.1)      | 37.6 (33.1 to 40.1)      |
| The Gambia                        | 23.3 (20.6 to 25.5)      | 31.6 (28.8 to 33.7)      | 32.3 (29.7 to 34.6)      | 36.8 (32.1 to 39.8)      |
| Ghana                             | 27.6 (24.7 to 29.4)      | 37.4 (32.9 to 39.8)      | 39.1 (34.8 to 41.6)      | 45.7 (38.9 to 49.4)      |
| Guinea                            | 9.2 (8.0 to 10.5)        | 18.9 (16.6 to 20.9)      | 21.0 (18.6 to 23.0)      | 27.6 (24.3 to 30.4)      |
| Guinea-Bissau                     | 11.4 (9.4 to 13.5)       | 24.2 (21.4 to 26.4)      | 25.5 (22.9 to 27.7)      | 31.3 (27.5 to 34.2)      |
| Liberia                           | 10.5 (9.2 to 11.6)       | 21.9 (19.3 to 24.1)      | 23.5 (21.1 to 25.7)      | 28.9 (26.2 to 31.5)      |
| Mali                              | 11.1 (9.5 to 12.8)       | 24.2 (20.6 to 27.1)      | 25.6 (22.3 to 28.7)      | 34.3 (29.2 to 38.2)      |
| Mauritania                        | 20.0 (17.1 to 22.0)      | 31.9 (27.5 to 34.3)      | 31.2 (26.9 to 33.7)      | 38.7 (32.9 to 42.3)      |
| Niger                             | 7.3 (6.1 to 8.7)         | 16.4 (13.7 to 19.1)      | 17.3 (14.4 to 20.2)      | 25.3 (20.5 to 29.7)      |
| Nigeria                           | 15.8 (13.4 to 17.8)      | 29.7 (25.6 to 33.0)      | 30.7 (26.5 to 34.0)      | 38.2 (32.7 to 42.7)      |
| Sao Tome and Principe             | 31.3 (28.5 to 33.2)      | 49.4 (47.0 to 51.4)      | 51.3 (49.0 to 53.3)      | 58.4 (52.5 to 61.8)      |
| Senegal                           | 25.4 (23.2 to 27.0)      | 35.4 (31.4 to 37.2)      | 36.6 (33.6 to 38.5)      | 40.6 (35.4 to 43.6)      |
| Sierra Leone                      | 10.1 (9.2 to 11.4)       | 21.8 (19.7 to 23.7)      | 19.6 (17.8 to 21.2)      | 28.7 (25.4 to 31.6)      |
| Togo                              | 19.1 (16.9 to 21.0)      | 29.5 (26.0 to 31.6)      | 30.8 (28.1 to 32.9)      | 35.8 (30.4 to 38.5)      |

**Supplementary table 2. Values, by sex, for selected health-related SDG indicators in 2017, by country or territory.** Estimates are reported for each country and territory included in this analysis, and ordered by health-related SDG indicator followed by GBD super-region and region. SDG=Sustainable Development Goal. GBD=Global Burden of Disease. UI=uncertainty interval.

|                                                                                            | Estimate in 2017, male (95% UIs) | Estimate in 2017, female (95% UIs) |
|--------------------------------------------------------------------------------------------|----------------------------------|------------------------------------|
| <b>Indicator 3.3.1: Age-standardised rate of new HIV infections (per 1,000 population)</b> |                                  |                                    |
| Central Europe, Eastern Europe, and Central Asia                                           |                                  |                                    |
| Central Asia                                                                               |                                  |                                    |
| Armenia                                                                                    | 0.06 (0.04 to 0.09)              | 0.04 (0.03 to 0.05)                |
| Azerbaijan                                                                                 | 0.04 (0.03 to 0.07)              | 0.02 (0.01 to 0.02)                |
| Georgia                                                                                    | 0.15 (0.09 to 0.26)              | 0.05 (0.03 to 0.08)                |
| Kazakhstan                                                                                 | 0.15 (0.1 to 0.19)               | 0.1 (0.07 to 0.14)                 |
| Kyrgyzstan                                                                                 | 0.14 (0.09 to 0.22)              | 0.14 (0.09 to 0.22)                |
| Mongolia                                                                                   | 0.03 (0.01 to 0.07)              | 0.01 (0 to 0.02)                   |
| Tajikistan                                                                                 | 0.03 (0.02 to 0.04)              | 0.1 (0.04 to 0.16)                 |
| Turkmenistan                                                                               | 0.04 (0.03 to 0.05)              | 0.02 (0.01 to 0.03)                |
| Uzbekistan                                                                                 | 0.06 (0.02 to 0.11)              | 0.06 (0.02 to 0.11)                |
| Central Europe                                                                             |                                  |                                    |
| Albania                                                                                    | 0 (0 to 0)                       | 0 (0 to 0)                         |
| Bosnia and Herzegovina                                                                     | 0 (0 to 0)                       | 0 (0 to 0)                         |
| Bulgaria                                                                                   | 0.03 (0.02 to 0.03)              | 0.01 (0.01 to 0.02)                |
| Croatia                                                                                    | 0.01 (0.01 to 0.02)              | 0.01 (0 to 0.01)                   |
| Czech Republic                                                                             | 0.02 (0.01 to 0.03)              | 0 (0 to 0.01)                      |
| Hungary                                                                                    | 0.02 (0.01 to 0.03)              | 0 (0 to 0.01)                      |
| Macedonia                                                                                  | 0 (0 to 0.01)                    | 0 (0 to 0.01)                      |
| Montenegro                                                                                 | 0.02 (0.01 to 0.02)              | 0.01 (0.01 to 0.01)                |
| Poland                                                                                     | 0.03 (0.01 to 0.05)              | 0.01 (0.01 to 0.01)                |
| Romania                                                                                    | 0.07 (0.05 to 0.09)              | 0.04 (0.03 to 0.05)                |
| Serbia                                                                                     | 0.03 (0.02 to 0.04)              | 0 (0 to 0.01)                      |
| Slovakia                                                                                   | 0.01 (0 to 0.01)                 | 0 (0 to 0)                         |
| Slovenia                                                                                   | 0.01 (0.01 to 0.02)              | 0 (0 to 0)                         |
| Eastern Europe                                                                             |                                  |                                    |
| Belarus                                                                                    | 0.24 (0.18 to 0.33)              | 0.24 (0.15 to 0.38)                |
| Estonia                                                                                    | 0.27 (0.19 to 0.39)              | 0.08 (0.06 to 0.12)                |
| Latvia                                                                                     | 0.27 (0.22 to 0.34)              | 0.21 (0.15 to 0.24)                |
| Lithuania                                                                                  | 0.07 (0.02 to 0.11)              | 0.03 (0.01 to 0.04)                |
| Moldova                                                                                    | 0.18 (0.13 to 0.26)              | 0.18 (0.13 to 0.27)                |
| Russian Federation                                                                         | 1.24 (1.02 to 1.55)              | 0.57 (0.48 to 0.72)                |
| Ukraine                                                                                    | 0.65 (0.39 to 0.82)              | 0.46 (0.3 to 0.67)                 |
| High-income                                                                                |                                  |                                    |
| Australasia                                                                                |                                  |                                    |
| Australia                                                                                  | 0.09 (0.05 to 0.13)              | 0.03 (0.02 to 0.06)                |
| New Zealand                                                                                | 0.07 (0.03 to 0.11)              | 0.02 (0.01 to 0.03)                |
| High-income Asia Pacific                                                                   |                                  |                                    |
| Brunei                                                                                     | 0.1 (0.06 to 0.17)               | 0.03 (0.02 to 0.05)                |
| Japan                                                                                      | 0.02 (0.01 to 0.02)              | 0.01 (0 to 0.01)                   |
| South Korea                                                                                | 0.04 (0.01 to 0.07)              | 0.01 (0 to 0.01)                   |

|                                    | Estimate in 2017, male (95% UIs) | Estimate in 2017, female (95% UIs) |
|------------------------------------|----------------------------------|------------------------------------|
| Singapore                          | 0.03 (0.02 to 0.06)              | 0.02 (0.01 to 0.02)                |
| <b>High-income North America</b>   |                                  |                                    |
| Canada                             | 0.15 (0.06 to 0.25)              | 0.06 (0.03 to 0.1)                 |
| Greenland                          | 0.16 (0.07 to 0.27)              | 0.24 (0.09 to 0.42)                |
| United States                      | 0.24 (0.09 to 0.38)              | 0.1 (0.04 to 0.16)                 |
| <b>Southern Latin America</b>      |                                  |                                    |
| Argentina                          | 0.29 (0.15 to 0.5)               | 0.26 (0.11 to 0.51)                |
| Chile                              | 0.37 (0.19 to 0.59)              | 0.07 (0.04 to 0.13)                |
| Uruguay                            | 0.4 (0.32 to 0.5)                | 0.12 (0.08 to 0.17)                |
| <b>Western Europe</b>              |                                  |                                    |
| Andorra                            | 0.1 (0 to 0.48)                  | 0.02 (0 to 0.09)                   |
| Austria                            | 0.12 (0.06 to 0.18)              | 0.04 (0.02 to 0.06)                |
| Belgium                            | 0.13 (0.05 to 0.2)               | 0.07 (0.03 to 0.1)                 |
| Cyprus                             | 0.13 (0.09 to 0.19)              | 0.03 (0.02 to 0.04)                |
| Denmark                            | 0.09 (0.04 to 0.15)              | 0.06 (0.02 to 0.09)                |
| Finland                            | 0.04 (0.01 to 0.07)              | 0.01 (0 to 0.02)                   |
| France                             | 0.11 (0.05 to 0.2)               | 0.05 (0.02 to 0.09)                |
| Germany                            | 0.11 (0.06 to 0.15)              | 0.04 (0.02 to 0.05)                |
| Greece                             | 0.11 (0.07 to 0.19)              | 0.01 (0.01 to 0.02)                |
| Iceland                            | 0.12 (0.05 to 0.18)              | 0 (0 to 0)                         |
| Ireland                            | 0.18 (0.07 to 0.28)              | 0.07 (0.03 to 0.1)                 |
| Israel                             | 0.11 (0.06 to 0.16)              | 0.05 (0.02 to 0.07)                |
| Italy                              | 0.19 (0.11 to 0.28)              | 0.06 (0.04 to 0.09)                |
| Luxembourg                         | 0.24 (0.11 to 0.35)              | 0.07 (0.03 to 0.1)                 |
| Malta                              | 0.38 (0.2 to 0.63)               | 0.08 (0.04 to 0.12)                |
| Netherlands                        | 0.04 (0.02 to 0.06)              | 0.03 (0.01 to 0.04)                |
| Norway                             | 0.08 (0.04 to 0.11)              | 0.04 (0.02 to 0.06)                |
| Portugal                           | 1.27 (0.65 to 1.92)              | 0.34 (0.18 to 0.51)                |
| Spain                              | 0.22 (0.09 to 0.39)              | 0.06 (0.02 to 0.1)                 |
| Sweden                             | 0.08 (0.04 to 0.13)              | 0.06 (0.03 to 0.09)                |
| Switzerland                        | 0.09 (0.03 to 0.14)              | 0.05 (0.02 to 0.07)                |
| United Kingdom                     | 0.15 (0.09 to 0.22)              | 0.06 (0.04 to 0.09)                |
| <b>Latin America and Caribbean</b> |                                  |                                    |
| <b>Andean Latin America</b>        |                                  |                                    |
| Bolivia                            | 0.27 (0.03 to 0.96)              | 0.15 (0.01 to 0.64)                |
| Ecuador                            | 0.24 (0.2 to 0.29)               | 0.12 (0.08 to 0.16)                |
| Peru                               | 0.28 (0.2 to 0.45)               | 0.12 (0.08 to 0.18)                |
| <b>Caribbean</b>                   |                                  |                                    |
| Antigua and Barbuda                | 0.14 (0.11 to 0.18)              | 0.06 (0.04 to 0.08)                |
| The Bahamas                        | 1.14 (0.95 to 1.41)              | 0.68 (0.57 to 0.9)                 |
| Barbados                           | 0.3 (0.21 to 0.45)               | 0.2 (0.14 to 0.28)                 |
| Belize                             | 0.67 (0.6 to 0.78)               | 0.53 (0.42 to 0.68)                |
| Bermuda                            | 0.14 (0.12 to 0.17)              | 0.05 (0.04 to 0.07)                |
| Cuba                               | 0.34 (0.18 to 0.52)              | 0.11 (0.05 to 0.2)                 |
| Dominica                           | 0.13 (0.11 to 0.18)              | 0.06 (0.04 to 0.1)                 |
| Dominican Republic                 | 0.4 (0.22 to 0.65)               | 0.31 (0.14 to 0.53)                |
| Grenada                            | 0.08 (0.07 to 0.1)               | 0.03 (0.03 to 0.05)                |

|                                     | Estimate in 2017, male (95% UIs) | Estimate in 2017, female (95% UIs) |
|-------------------------------------|----------------------------------|------------------------------------|
| Guyana                              | 0.73 (0.51 to 1)                 | 0.86 (0.58 to 1.11)                |
| Haiti                               | 0.59 (0.38 to 0.87)              | 0.71 (0.46 to 0.97)                |
| Jamaica                             | 0.51 (0.41 to 0.65)              | 0.34 (0.24 to 0.49)                |
| Puerto Rico                         | 0.08 (0.07 to 0.09)              | 0.03 (0.03 to 0.04)                |
| Saint Lucia                         | 0.06 (0.05 to 0.08)              | 0.04 (0.03 to 0.05)                |
| Saint Vincent and the Grenadines    | 0.23 (0.19 to 0.3)               | 0.13 (0.11 to 0.18)                |
| Suriname                            | 0.4 (0.32 to 0.53)               | 0.33 (0.26 to 0.45)                |
| Trinidad and Tobago                 | 0.32 (0.27 to 0.39)              | 0.29 (0.23 to 0.39)                |
| Virgin Islands, U.S.                | 0.27 (0.17 to 0.44)              | 0.08 (0.06 to 0.13)                |
| <b>Central Latin America</b>        |                                  |                                    |
| Colombia                            | 0.27 (0.21 to 0.37)              | 0.09 (0.06 to 0.13)                |
| Costa Rica                          | 0.12 (0.09 to 0.17)              | 0.04 (0.02 to 0.05)                |
| El Salvador                         | 0.28 (0.16 to 0.38)              | 0.14 (0.08 to 0.21)                |
| Guatemala                           | 0.17 (0.08 to 0.37)              | 0.09 (0.04 to 0.19)                |
| Honduras                            | 0.06 (0.04 to 0.08)              | 0.04 (0.02 to 0.08)                |
| Mexico                              | 0.25 (0.18 to 0.33)              | 0.06 (0.04 to 0.08)                |
| Nicaragua                           | 0.39 (0.25 to 0.57)              | 0.22 (0.15 to 0.31)                |
| Panama                              | 0.73 (0.57 to 1.01)              | 0.22 (0.17 to 0.28)                |
| Venezuela                           | 0.42 (0.34 to 0.51)              | 0.08 (0.06 to 0.12)                |
| <b>Tropical Latin America</b>       |                                  |                                    |
| Brazil                              | 0.49 (0.36 to 0.58)              | 0.25 (0.18 to 0.3)                 |
| Paraguay                            | 0.28 (0.18 to 0.38)              | 0.18 (0.11 to 0.26)                |
| <b>North Africa and Middle East</b> |                                  |                                    |
| <b>North Africa and Middle East</b> |                                  |                                    |
| Afghanistan                         | 0.04 (0 to 0.2)                  | 0.02 (0 to 0.09)                   |
| Algeria                             | 0.03 (0 to 0.1)                  | 0.02 (0 to 0.08)                   |
| Bahrain                             | 0.02 (0.01 to 0.02)              | 0.01 (0.01 to 0.01)                |
| Egypt                               | 0.01 (0.01 to 0.01)              | 0 (0 to 0)                         |
| Iran                                | 0.03 (0.02 to 0.05)              | 0.04 (0.02 to 0.05)                |
| Iraq                                | 0 (0 to 0.01)                    | 0.01 (0 to 0.01)                   |
| Jordan                              | 0.01 (0 to 0.01)                 | 0 (0 to 0.01)                      |
| Kuwait                              | 0 (0 to 0.01)                    | 0 (0 to 0)                         |
| Lebanon                             | 0.04 (0 to 0.2)                  | 0.02 (0 to 0.09)                   |
| Libya                               | 0.03 (0 to 0.14)                 | 0.03 (0 to 0.13)                   |
| Morocco                             | 0.03 (0 to 0.16)                 | 0.03 (0 to 0.15)                   |
| Palestine                           | 0 (0 to 0.01)                    | 0 (0 to 0.01)                      |
| Oman                                | 0.12 (0.05 to 0.19)              | 0.03 (0.02 to 0.04)                |
| Qatar                               | 0 (0 to 0)                       | 0 (0 to 0)                         |
| Saudi Arabia                        | 0.02 (0.01 to 0.03)              | 0.02 (0.01 to 0.04)                |
| Sudan                               | 0.15 (0.07 to 0.31)              | 0.19 (0.08 to 0.37)                |
| Syria                               | 0 (0 to 0)                       | 0 (0 to 0)                         |
| Tunisia                             | 0.05 (0.01 to 0.17)              | 0.03 (0 to 0.14)                   |
| Turkey                              | 0.01 (0.01 to 0.01)              | 0 (0 to 0.01)                      |
| United Arab Emirates                | 0.06 (0 to 0.4)                  | 0.02 (0 to 0.07)                   |
| Yemen                               | 0.05 (0 to 0.24)                 | 0.03 (0 to 0.11)                   |
| <b>South Asia</b>                   |                                  |                                    |
| <b>South Asia</b>                   |                                  |                                    |



|                                               | Estimate in 2017, male (95% UIs) | Estimate in 2017, female (95% UIs) |
|-----------------------------------------------|----------------------------------|------------------------------------|
| Bangladesh                                    | 0.01 (0 to 0.03)                 | 0.01 (0 to 0.02)                   |
| Bhutan                                        | 0.16 (0 to 0.68)                 | 0.08 (0 to 0.38)                   |
| India                                         | 0.08 (0.05 to 0.11)              | 0.06 (0.04 to 0.09)                |
| Nepal                                         | 0.1 (0 to 0.47)                  | 0.05 (0 to 0.24)                   |
| Pakistan                                      | 0.09 (0 to 0.39)                 | 0.05 (0 to 0.2)                    |
| <b>Southeast Asia, East Asia, and Oceania</b> |                                  |                                    |
| <b>East Asia</b>                              |                                  |                                    |
| China                                         | 0.03 (0.01 to 0.06)              | 0.01 (0 to 0.02)                   |
| North Korea                                   | 0.06 (0 to 0.39)                 | 0.03 (0 to 0.17)                   |
| Taiwan (Province of China)                    | 0.02 (0.01 to 0.03)              | 0 (0 to 0)                         |
| <b>Oceania</b>                                |                                  |                                    |
| American Samoa                                | 0.02 (0.01 to 0.03)              | 0.01 (0 to 0.01)                   |
| Federated States of Micronesia                | 0.8 (0.01 to 5)                  | 0.73 (0 to 5.02)                   |
| Fiji                                          | 0.05 (0.03 to 0.07)              | 0.06 (0.04 to 0.08)                |
| Guam                                          | 0.08 (0.04 to 0.13)              | 0.01 (0.01 to 0.02)                |
| Kiribati                                      | 0.01 (0 to 0.01)                 | 0.01 (0 to 0.01)                   |
| Marshall Islands                              | 0.13 (0 to 0.91)                 | 0.14 (0 to 0.87)                   |
| Northern Mariana Islands                      | 0.02 (0.01 to 0.04)              | 0.01 (0 to 0.02)                   |
| Papua New Guinea                              | 0.28 (0.02 to 1.22)              | 0.37 (0.03 to 1.57)                |
| Samoa                                         | 0.14 (0 to 0.98)                 | 0.14 (0 to 0.96)                   |
| Solomon Islands                               | 0.12 (0 to 0.86)                 | 0.14 (0 to 0.87)                   |
| Tonga                                         | 0.03 (0.02 to 0.05)              | 0.02 (0.01 to 0.04)                |
| Vanuatu                                       | 0.13 (0 to 0.91)                 | 0.14 (0 to 0.96)                   |
| <b>Southeast Asia</b>                         |                                  |                                    |
| Cambodia                                      | 0.06 (0.01 to 0.15)              | 0.06 (0.01 to 0.16)                |
| Indonesia                                     | 0.09 (0.07 to 0.12)              | 0.05 (0.04 to 0.07)                |
| Laos                                          | 0.16 (0 to 1.05)                 | 0.06 (0 to 0.37)                   |
| Malaysia                                      | 0.18 (0.11 to 0.22)              | 0.08 (0.06 to 0.1)                 |
| Maldives                                      | 0 (0 to 0)                       | 0.01 (0 to 0.01)                   |
| Mauritius                                     | 0.29 (0.22 to 0.39)              | 0.16 (0.11 to 0.2)                 |
| Myanmar                                       | 0.18 (0.11 to 0.31)              | 0.17 (0.1 to 0.25)                 |
| Philippines                                   | 0.19 (0.12 to 0.31)              | 0.06 (0.03 to 0.09)                |
| Sri Lanka                                     | 0.02 (0.01 to 0.03)              | 0.01 (0.01 to 0.01)                |
| Seychelles                                    | 0.06 (0.05 to 0.09)              | 0.05 (0.04 to 0.07)                |
| Thailand                                      | 0.42 (0.34 to 0.58)              | 0.26 (0.18 to 0.41)                |
| Timor-Leste                                   | 0.24 (0 to 1.65)                 | 0.14 (0 to 0.85)                   |
| Vietnam                                       | 0.31 (0.25 to 0.41)              | 0.07 (0.04 to 0.12)                |
| <b>Sub-Saharan Africa</b>                     |                                  |                                    |
| <b>Central Sub-Saharan Africa</b>             |                                  |                                    |
| Angola                                        | 0.55 (0.21 to 1)                 | 0.97 (0.37 to 1.73)                |
| Central African Republic                      | 0.73 (0.15 to 1.65)              | 1.53 (0.3 to 3.36)                 |
| Congo                                         | 1.05 (0.73 to 1.43)              | 1.75 (1.2 to 2.36)                 |
| Democratic Republic of the Congo              | 0.14 (0.03 to 0.32)              | 0.25 (0.04 to 0.57)                |
| Equatorial Guinea                             | 1.29 (0.34 to 3.09)              | 2.45 (0.58 to 5.81)                |
| Gabon                                         | 0.28 (0.15 to 0.5)               | 0.54 (0.3 to 0.96)                 |
| <b>Eastern Sub-Saharan Africa</b>             |                                  |                                    |
| Burundi                                       | 0.24 (0.05 to 0.55)              | 0.37 (0.08 to 0.9)                 |

|                                                                                              | Estimate in 2017, male (95% UIs) | Estimate in 2017, female (95% UIs) |
|----------------------------------------------------------------------------------------------|----------------------------------|------------------------------------|
| Comoros                                                                                      | 0.03 (0 to 0.19)                 | 0.01 (0 to 0.05)                   |
| Djibouti                                                                                     | 0.57 (0.16 to 1.24)              | 0.83 (0.23 to 1.79)                |
| Eritrea                                                                                      | 0.24 (0.06 to 0.48)              | 0.36 (0.08 to 0.75)                |
| Ethiopia                                                                                     | 0.11 (0.06 to 0.18)              | 0.18 (0.1 to 0.3)                  |
| Kenya                                                                                        | 1.63 (1.07 to 2.48)              | 2.3 (1.55 to 3.36)                 |
| Madagascar                                                                                   | 0.31 (0.03 to 1.53)              | 0.43 (0.05 to 2.05)                |
| Malawi                                                                                       | 1.39 (0.66 to 2.23)              | 1.78 (0.79 to 2.96)                |
| Mozambique                                                                                   | 4.19 (2.66 to 6.22)              | 5.14 (3.32 to 7.59)                |
| Rwanda                                                                                       | 0.42 (0.26 to 0.67)              | 0.63 (0.4 to 0.96)                 |
| Somalia                                                                                      | 0.13 (0 to 0.53)                 | 0.17 (0.01 to 0.67)                |
| South Sudan                                                                                  | 0.39 (0.01 to 1.4)               | 0.6 (0.02 to 2.14)                 |
| Tanzania                                                                                     | 0.87 (0.03 to 2.83)              | 1.2 (0.04 to 3.85)                 |
| Uganda                                                                                       | 0.98 (0.11 to 3.38)              | 1.28 (0.12 to 4.73)                |
| Zambia                                                                                       | 2.41 (1.54 to 3.62)              | 2.97 (1.95 to 4.39)                |
| <b>Southern Sub-Saharan Africa</b>                                                           |                                  |                                    |
| Botswana                                                                                     | 3.19 (2.12 to 4.59)              | 4.11 (2.84 to 5.71)                |
| Lesotho                                                                                      | 5.46 (3.77 to 7.42)              | 6.92 (4.84 to 9.22)                |
| Namibia                                                                                      | 3.47 (2.02 to 5.65)              | 4.36 (2.52 to 7.24)                |
| South Africa                                                                                 | 3.96 (2.93 to 5.14)              | 5.33 (4 to 6.81)                   |
| Swaziland                                                                                    | 1.78 (0.46 to 3.38)              | 2.15 (0.48 to 4.09)                |
| Zimbabwe                                                                                     | 3.48 (0.11 to 8.08)              | 4.51 (0.12 to 10.36)               |
| <b>Western Sub-Saharan Africa</b>                                                            |                                  |                                    |
| Benin                                                                                        | 0.27 (0.15 to 0.43)              | 0.38 (0.2 to 0.6)                  |
| Burkina Faso                                                                                 | 0.13 (0.02 to 0.29)              | 0.18 (0.03 to 0.37)                |
| Cameroon                                                                                     | 0.85 (0.26 to 1.43)              | 1.41 (0.4 to 2.32)                 |
| Cape Verde                                                                                   | 0.52 (0.34 to 0.76)              | 0.59 (0.4 to 0.83)                 |
| Chad                                                                                         | 0.56 (0.19 to 1.02)              | 0.73 (0.26 to 1.31)                |
| Cote d'Ivoire                                                                                | 1.49 (0.23 to 2.61)              | 2.31 (0.35 to 4.08)                |
| The Gambia                                                                                   | 0.52 (0.16 to 0.97)              | 0.68 (0.21 to 1.25)                |
| Ghana                                                                                        | 0.52 (0.28 to 0.89)              | 0.99 (0.55 to 1.63)                |
| Guinea                                                                                       | 0.41 (0.22 to 0.67)              | 0.64 (0.34 to 1.05)                |
| Guinea-Bissau                                                                                | 1.1 (0.38 to 2.12)               | 1.57 (0.54 to 2.94)                |
| Liberia                                                                                      | 0.45 (0.19 to 0.83)              | 0.63 (0.26 to 1.12)                |
| Mali                                                                                         | 0.37 (0.24 to 0.52)              | 0.49 (0.32 to 0.7)                 |
| Mauritania                                                                                   | 0.03 (0 to 0.2)                  | 0.01 (0 to 0.06)                   |
| Niger                                                                                        | 0.1 (0.05 to 0.17)               | 0.13 (0.06 to 0.2)                 |
| Nigeria                                                                                      | 1.05 (0.71 to 1.48)              | 1.3 (0.89 to 1.76)                 |
| Sao Tome and Principe                                                                        | 0.01 (0 to 0.03)                 | 0 (0 to 0.01)                      |
| Senegal                                                                                      | 0.16 (0.1 to 0.25)               | 0.26 (0.16 to 0.4)                 |
| Sierra Leone                                                                                 | 0.34 (0.04 to 0.78)              | 0.47 (0.06 to 1.06)                |
| Togo                                                                                         | 0.37 (0.07 to 0.81)              | 0.63 (0.1 to 1.41)                 |
| <b>Indicator 3.3.2: Age-standardised rate of tuberculosis cases (per 100,000 population)</b> |                                  |                                    |
| Central Europe, Eastern Europe, and Central Asia                                             |                                  |                                    |
| Central Asia                                                                                 |                                  |                                    |
| Armenia                                                                                      | 51.21 (46.73 to 55.7)            | 17.86 (16.01 to 19.76)             |
| Azerbaijan                                                                                   | 135.65 (120.31 to 151.99)        | 74.5 (65.92 to 84.2)               |

|                                  | Estimate in 2017, male (95% UIs) | Estimate in 2017, female (95% UIs) |
|----------------------------------|----------------------------------|------------------------------------|
| Georgia                          | 94.24 (85.78 to 102.32)          | 47.41 (43.2 to 52.06)              |
| Kazakhstan                       | 93.57 (85.24 to 101.97)          | 58.51 (53.28 to 63.86)             |
| Kyrgyzstan                       | 136.52 (125.17 to 148.29)        | 94.23 (86.02 to 103.05)            |
| Mongolia                         | 169.95 (152.52 to 189.67)        | 132.6 (119.53 to 145.96)           |
| Tajikistan                       | 110.47 (98.73 to 122.31)         | 105.35 (95.12 to 116.74)           |
| Turkmenistan                     | 94.73 (83.91 to 107.58)          | 62.83 (54.77 to 71.37)             |
| Uzbekistan                       | 74.82 (68.76 to 81.68)           | 51.56 (47.42 to 56.08)             |
| <b>Central Europe</b>            |                                  |                                    |
| Albania                          | 18.87 (16.92 to 21.25)           | 10 (9.02 to 11.13)                 |
| Bosnia and Herzegovina           | 36.01 (32.36 to 40.12)           | 21.15 (19.03 to 23.51)             |
| Bulgaria                         | 23.38 (21.57 to 25.23)           | 14.95 (13.78 to 16.25)             |
| Croatia                          | 11.74 (10.69 to 12.88)           | 8.49 (7.62 to 9.38)                |
| Czech Republic                   | 6.28 (5.7 to 6.96)               | 4.18 (3.73 to 4.66)                |
| Hungary                          | 9.06 (8.23 to 9.98)              | 6.38 (5.79 to 7.03)                |
| Macedonia                        | 26.49 (23.97 to 29.3)            | 20.02 (17.87 to 22.4)              |
| Montenegro                       | 14.59 (13.09 to 16.29)           | 13.41 (11.99 to 15.01)             |
| Poland                           | 16.23 (14.87 to 17.78)           | 7.89 (7.23 to 8.57)                |
| Romania                          | 76.57 (70.28 to 83.2)            | 41.96 (38.5 to 45.7)               |
| Serbia                           | 26.45 (23.82 to 29.44)           | 17.35 (15.57 to 19.4)              |
| Slovakia                         | 11.35 (10.17 to 12.69)           | 7.31 (6.53 to 8.16)                |
| Slovenia                         | 7.08 (6.35 to 7.88)              | 5.79 (5.12 to 6.5)                 |
| <b>Eastern Europe</b>            |                                  |                                    |
| Belarus                          | 48.88 (44.47 to 53.48)           | 19.06 (17.4 to 21)                 |
| Estonia                          | 25.94 (23.3 to 28.82)            | 12.08 (10.7 to 13.57)              |
| Latvia                           | 43.63 (40.05 to 47.34)           | 21.9 (19.7 to 24.12)               |
| Lithuania                        | 60.83 (55.42 to 66.92)           | 26.28 (23.71 to 28.98)             |
| Moldova                          | 110.14 (100.19 to 121.43)        | 44.44 (40.02 to 48.76)             |
| Russia                           | 93.81 (84.22 to 104.32)          | 44.95 (40.33 to 49.58)             |
| Ukraine                          | 87.22 (76.16 to 100.5)           | 39.69 (34.31 to 45.64)             |
| <b>High-income</b>               |                                  |                                    |
| <b>Australasia</b>               |                                  |                                    |
| Australia                        | 4.97 (4.51 to 5.45)              | 4.88 (4.39 to 5.4)                 |
| New Zealand                      | 10.55 (9.51 to 11.66)            | 11.14 (9.98 to 12.4)               |
| <b>High-income Asia Pacific</b>  |                                  |                                    |
| Brunei                           | 103.54 (93.62 to 114.04)         | 106.82 (96.59 to 118.04)           |
| Japan                            | 10.1 (9.2 to 11.08)              | 6.22 (5.61 to 6.88)                |
| South Korea                      | 65.45 (59.91 to 71.12)           | 39.97 (36.5 to 43.71)              |
| Singapore                        | 42.81 (38.87 to 46.68)           | 29.16 (26.05 to 32.48)             |
| <b>High-income North America</b> |                                  |                                    |
| Canada                           | 4.6 (4.27 to 4.98)               | 4.2 (3.86 to 4.57)                 |
| Greenland                        | 65.33 (60.1 to 70.57)            | 45.11 (41.2 to 49.28)              |
| United States                    | 3.01 (2.68 to 3.4)               | 2.06 (1.81 to 2.36)                |
| <b>Southern Latin America</b>    |                                  |                                    |
| Argentina                        | 25.57 (23.59 to 27.72)           | 19.03 (17.48 to 20.55)             |
| Chile                            | 17.9 (16.54 to 19.36)            | 10.38 (9.54 to 11.27)              |
| Uruguay                          | 28.08 (25.53 to 30.97)           | 14.26 (12.98 to 15.65)             |
| <b>Western Europe</b>            |                                  |                                    |

|                                  | Estimate in 2017, male (95% UIs) | Estimate in 2017, female (95% UIs) |
|----------------------------------|----------------------------------|------------------------------------|
| Andorra                          | 7.12 (6.39 to 8.06)              | 7.24 (6.38 to 8.21)                |
| Austria                          | 9.3 (8.37 to 10.33)              | 5.57 (4.96 to 6.26)                |
| Belgium                          | 10.49 (9.57 to 11.49)            | 6.39 (5.76 to 7.07)                |
| Cyprus                           | 8.36 (7.36 to 9.49)              | 4.97 (4.35 to 5.71)                |
| Denmark                          | 7.46 (6.68 to 8.38)              | 4.96 (4.39 to 5.58)                |
| Finland                          | 6.1 (5.45 to 6.83)               | 4.68 (4.15 to 5.24)                |
| France                           | 8.86 (8.02 to 9.69)              | 5.44 (4.91 to 6.02)                |
| Germany                          | 9.21 (8.25 to 10.28)             | 4.62 (4.18 to 5.1)                 |
| Greece                           | 6.13 (5.53 to 6.8)               | 3.23 (2.87 to 3.61)                |
| Iceland                          | 5.69 (4.96 to 6.52)              | 5.34 (4.63 to 6.09)                |
| Ireland                          | 7.68 (6.85 to 8.55)              | 5.75 (5.12 to 6.39)                |
| Israel                           | 4.85 (4.29 to 5.42)              | 3.32 (2.92 to 3.75)                |
| Italy                            | 8.09 (6.92 to 9.34)              | 4.54 (3.92 to 5.19)                |
| Luxembourg                       | 7.58 (6.65 to 8.68)              | 4.77 (4.15 to 5.49)                |
| Malta                            | 10.02 (8.71 to 11.44)            | 6.34 (5.46 to 7.29)                |
| Netherlands                      | 6.27 (5.66 to 6.93)              | 4.81 (4.31 to 5.42)                |
| Norway                           | 7.08 (6.17 to 8.17)              | 6.15 (5.33 to 7.07)                |
| Portugal                         | 21.02 (18.93 to 23.02)           | 11.78 (10.64 to 13.03)             |
| Spain                            | 10.34 (8.23 to 12.58)            | 7.18 (5.79 to 8.84)                |
| Sweden                           | 9.34 (7.94 to 11.1)              | 6.5 (5.52 to 7.65)                 |
| Switzerland                      | 8.23 (7.28 to 9.22)              | 5.38 (4.81 to 5.96)                |
| United Kingdom                   | 13.83 (12.15 to 15.69)           | 13.49 (11.78 to 15.34)             |
| Latin America and Caribbean      |                                  |                                    |
| Andean Latin America             |                                  |                                    |
| Bolivia                          | 104.33 (94.82 to 115.32)         | 73.14 (65.98 to 80.56)             |
| Ecuador                          | 43.58 (39.92 to 47.17)           | 24.42 (22.52 to 26.67)             |
| Peru                             | 96.82 (87.78 to 107.2)           | 74.52 (67.82 to 82.09)             |
| Caribbean                        |                                  |                                    |
| Antigua and Barbuda              | 16.44 (14.53 to 18.61)           | 16.8 (14.72 to 19.17)              |
| The Bahamas                      | 23.02 (20.7 to 25.47)            | 16.44 (14.74 to 18.09)             |
| Barbados                         | 6.22 (5.41 to 7.14)              | 7.17 (6.16 to 8.37)                |
| Belize                           | 46.63 (42.37 to 51.22)           | 26.92 (24.12 to 29.85)             |
| Bermuda                          | 16.51 (14.49 to 18.94)           | 24.64 (21.72 to 28.15)             |
| Cuba                             | 8.1 (7.33 to 8.95)               | 3.68 (3.31 to 4.09)                |
| Dominica                         | 32.34 (28.88 to 35.96)           | 31.44 (28.26 to 34.9)              |
| Dominican Republic               | 65.51 (59.33 to 72.05)           | 51.38 (46.1 to 56.85)              |
| Grenada                          | 11.03 (9.79 to 12.44)            | 12.28 (10.81 to 14.08)             |
| Guyana                           | 85.87 (78.59 to 93.77)           | 43.72 (39.91 to 47.68)             |
| Haiti                            | 93.35 (84.95 to 102.91)          | 77.22 (69.65 to 85.08)             |
| Jamaica                          | 17.58 (15.64 to 19.72)           | 15.64 (13.83 to 17.86)             |
| Puerto Rico                      | 4.43 (3.94 to 4.97)              | 2.9 (2.52 to 3.28)                 |
| Saint Lucia                      | 17.86 (15.85 to 19.98)           | 11.99 (10.63 to 13.44)             |
| Saint Vincent and the Grenadines | 24.68 (22.03 to 27.65)           | 18.25 (16.15 to 20.48)             |
| Suriname                         | 23.06 (20.6 to 25.67)            | 17.73 (15.65 to 20.05)             |
| Trinidad and Tobago              | 20.17 (18.42 to 22.15)           | 9.93 (8.9 to 10.95)                |
| Virgin Islands, U.S.             | 14.6 (12.97 to 16.32)            | 14.58 (12.83 to 16.48)             |
| Central Latin America            |                                  |                                    |

|                                               | Estimate in 2017, male (95% UIs) | Estimate in 2017, female (95% UIs) |
|-----------------------------------------------|----------------------------------|------------------------------------|
| Colombia                                      | 27.73 (25.19 to 30.42)           | 16.69 (15.13 to 18.37)             |
| Costa Rica                                    | 11.4 (10.28 to 12.66)            | 7.15 (6.33 to 8.04)                |
| El Salvador                                   | 34.41 (30.77 to 38.24)           | 24.74 (22.07 to 27.79)             |
| Guatemala                                     | 28.65 (26.25 to 31.24)           | 19.02 (17.31 to 20.97)             |
| Honduras                                      | 45.29 (40.7 to 50.5)             | 37.39 (33.67 to 41.51)             |
| Mexico                                        | 19.86 (17.82 to 22.35)           | 14.71 (13.02 to 16.71)             |
| Nicaragua                                     | 38.86 (35.14 to 43.29)           | 33.28 (29.82 to 37.12)             |
| Panama                                        | 51.4 (46.44 to 56.55)            | 29.83 (26.92 to 32.96)             |
| Venezuela                                     | 29.18 (26.35 to 31.92)           | 17.98 (16.45 to 19.56)             |
| <b>Tropical Latin America</b>                 |                                  |                                    |
| Brazil                                        | 47.51 (42.64 to 53.49)           | 24.83 (22.22 to 28.08)             |
| Paraguay                                      | 65.26 (57.87 to 73.64)           | 36.22 (32.3 to 40.46)              |
| <b>North Africa and Middle East</b>           |                                  |                                    |
| <b>North Africa and Middle East</b>           |                                  |                                    |
| Afghanistan                                   | 135.18 (115.4 to 161.38)         | 167.48 (141.43 to 195.79)          |
| Algeria                                       | 38.85 (33.04 to 45.66)           | 35.59 (30.3 to 41.58)              |
| Bahrain                                       | 25.2 (22.96 to 27.69)            | 17.83 (16.03 to 19.82)             |
| Egypt                                         | 21.54 (18.33 to 25.17)           | 17.85 (15.29 to 20.75)             |
| Iran                                          | 16.33 (14.85 to 17.91)           | 15.22 (13.84 to 16.76)             |
| Iraq                                          | 40.27 (36.83 to 43.91)           | 41.28 (37.87 to 45.09)             |
| Jordan                                        | 10.71 (8.86 to 12.99)            | 10.86 (9 to 13.2)                  |
| Kuwait                                        | 20.87 (19.24 to 22.69)           | 18.13 (16.56 to 19.92)             |
| Lebanon                                       | 19.77 (17.49 to 22.32)           | 19.43 (17.03 to 21.97)             |
| Libya                                         | 30.83 (27.91 to 33.98)           | 25.98 (23.52 to 28.63)             |
| Morocco                                       | 147.82 (135.07 to 161.4)         | 142.61 (130.2 to 155.01)           |
| Palestine                                     | 16.65 (15.13 to 18.31)           | 12.65 (11.5 to 13.94)              |
| Oman                                          | 20.79 (18.93 to 22.93)           | 20.27 (18.15 to 22.6)              |
| Qatar                                         | 30.99 (27.86 to 34.35)           | 27.68 (24.85 to 30.8)              |
| Saudi Arabia                                  | 37.43 (33.94 to 41.15)           | 48.79 (44.56 to 53.7)              |
| Sudan                                         | 112.11 (101.18 to 124.23)        | 86.14 (76.22 to 96.97)             |
| Syria                                         | 20.86 (18.85 to 23.14)           | 23.22 (20.83 to 25.86)             |
| Tunisia                                       | 32.26 (29.23 to 35.52)           | 22.42 (20.21 to 24.83)             |
| Turkey                                        | 34.42 (30.28 to 38.95)           | 21.49 (18.92 to 24.61)             |
| United Arab Emirates                          | 18.25 (16.41 to 20.25)           | 16.35 (14.57 to 18.26)             |
| Yemen                                         | 65.09 (59.59 to 71.25)           | 58.5 (53.49 to 63.92)              |
| <b>South Asia</b>                             |                                  |                                    |
| <b>South Asia</b>                             |                                  |                                    |
| Bangladesh                                    | 164.4 (148.21 to 181.97)         | 96.27 (86.73 to 106.52)            |
| Bhutan                                        | 112.95 (100.36 to 127.82)        | 118.87 (105.19 to 134.12)          |
| India                                         | 234.3 (214.3 to 256.45)          | 210.48 (192.94 to 230.4)           |
| Nepal                                         | 187.56 (169.68 to 210.01)        | 167.26 (149.57 to 187.13)          |
| Pakistan                                      | 175.46 (161.12 to 191.66)        | 208.3 (189.93 to 229.08)           |
| <b>Southeast Asia, East Asia, and Oceania</b> |                                  |                                    |
| <b>East Asia</b>                              |                                  |                                    |
| China                                         | 66.73 (60.96 to 72.7)            | 45.36 (41.11 to 49.82)             |
| North Korea                                   | 196.49 (177.44 to 216.51)        | 151.92 (137.12 to 169.33)          |
| Taiwan                                        | 47.45 (43.68 to 51.59)           | 30.52 (27.84 to 33.32)             |

|                                   | Estimate in 2017, male (95% UIs) | Estimate in 2017, female (95% UIs) |
|-----------------------------------|----------------------------------|------------------------------------|
| <b>Oceania</b>                    |                                  |                                    |
| American Samoa                    | 17.84 (16.14 to 19.67)           | 15.38 (13.68 to 17.16)             |
| Federated States of Micronesia    | 116.47 (105.72 to 127.68)        | 133.52 (119.77 to 148.43)          |
| Fiji                              | 35.38 (32.24 to 38.78)           | 41.51 (37.4 to 46.06)              |
| Guam                              | 41.99 (37.99 to 45.97)           | 51.63 (46.38 to 56.97)             |
| Kiribati                          | 322.79 (294.02 to 354.83)        | 275 (246.88 to 306.09)             |
| Marshall Islands                  | 219.5 (199.22 to 240.39)         | 163.34 (146.17 to 181.94)          |
| Northern Mariana Islands          | 47.39 (42.96 to 51.93)           | 57.77 (51.85 to 64.24)             |
| Papua New Guinea                  | 163.95 (149.07 to 179.47)        | 196.27 (177.35 to 217.81)          |
| Samoa                             | 38.95 (35.64 to 42.64)           | 45.4 (40.72 to 50.12)              |
| Solomon Islands                   | 75.2 (68.8 to 82.42)             | 93.59 (84.51 to 103.64)            |
| Tonga                             | 34.58 (31.45 to 38.13)           | 36.98 (33.2 to 41)                 |
| Vanuatu                           | 75.58 (68.82 to 82.65)           | 74.42 (67.01 to 82.78)             |
| <b>Southeast Asia</b>             |                                  |                                    |
| Cambodia                          | 298.21 (269.98 to 330.15)        | 249.12 (225.03 to 276.2)           |
| Indonesia                         | 251.73 (230.43 to 273.84)        | 205.2 (186.33 to 225.81)           |
| Laos                              | 184.66 (160 to 211.88)           | 135.22 (115.86 to 156.2)           |
| Malaysia                          | 70.55 (64.08 to 77.42)           | 51.83 (46.97 to 57.29)             |
| Maldives                          | 47.62 (43.1 to 52.6)             | 34.04 (30.7 to 37.66)              |
| Mauritius                         | 20.56 (18.78 to 22.51)           | 16.43 (14.8 to 18.46)              |
| Myanmar                           | 235.55 (214.97 to 259.7)         | 188.9 (172.57 to 206.38)           |
| Philippines                       | 328.49 (295.32 to 364.68)        | 185.12 (167.85 to 204.01)          |
| Sri Lanka                         | 54.2 (46.41 to 63.18)            | 35.31 (29.84 to 41.09)             |
| Seychelles                        | 31.6 (28.64 to 34.74)            | 18.06 (16.01 to 20.42)             |
| Thailand                          | 82.53 (74.78 to 90.49)           | 61.52 (55.58 to 68.15)             |
| Timor-Leste                       | 202.96 (185.01 to 223.02)        | 170.79 (154.07 to 189.54)          |
| Vietnam                           | 169.64 (145.63 to 193.61)        | 98.63 (85.17 to 113.96)            |
| <b>Sub-Saharan Africa</b>         |                                  |                                    |
| <b>Central Sub-Saharan Africa</b> |                                  |                                    |
| Angola                            | 532.49 (480.47 to 589.15)        | 407.76 (366.89 to 454.39)          |
| Central African Republic          | 970.67 (881.82 to 1070.58)       | 841.17 (763.13 to 925.48)          |
| Congo                             | 455.48 (411.87 to 502.87)        | 462.8 (419.07 to 511.52)           |
| Democratic Republic of the Congo  | 601.9 (546.93 to 663.03)         | 611.17 (553.87 to 674.19)          |
| Equatorial Guinea                 | 421.07 (380.24 to 467.6)         | 441.66 (396.34 to 494.7)           |
| Gabon                             | 441.02 (398.13 to 486.38)        | 311.13 (280.85 to 344.72)          |
| <b>Eastern Sub-Saharan Africa</b> |                                  |                                    |
| Burundi                           | 797.17 (729.42 to 871.64)        | 726.08 (660.63 to 798.73)          |
| Comoros                           | 275.21 (248.27 to 305.2)         | 232.78 (209.29 to 259.68)          |
| Djibouti                          | 425.55 (377.67 to 478.67)        | 356.53 (318.06 to 398.95)          |
| Eritrea                           | 689.77 (626.58 to 760.41)        | 518.13 (470.83 to 566.3)           |
| Ethiopia                          | 314.75 (288 to 344.14)           | 243.98 (222.84 to 266.77)          |
| Kenya                             | 472.57 (430.76 to 518.8)         | 389.96 (354.4 to 429.06)           |
| Madagascar                        | 244.11 (203.02 to 294.03)        | 192.47 (156.55 to 235.3)           |
| Malawi                            | 681.84 (618.48 to 747.59)        | 535.14 (483.51 to 590.89)          |
| Mozambique                        | 933.71 (845.68 to 1024.46)       | 783.66 (712.44 to 861.14)          |
| Rwanda                            | 485.24 (445.07 to 532.4)         | 364.16 (332.65 to 399.53)          |
| Somalia                           | 436.68 (377.42 to 502.67)        | 357.09 (305.2 to 414.72)           |

|                                                                                                                                                                                         | Estimate in 2017, male (95% UIs) | Estimate in 2017, female (95% UIs) |
|-----------------------------------------------------------------------------------------------------------------------------------------------------------------------------------------|----------------------------------|------------------------------------|
| South Sudan                                                                                                                                                                             | 428.92 (393.19 to 468.24)        | 369.31 (340.09 to 402.66)          |
| Tanzania                                                                                                                                                                                | 492.11 (445.79 to 543.71)        | 420 (378.61 to 466.8)              |
| Uganda                                                                                                                                                                                  | 710.39 (633.29 to 794.41)        | 508.18 (454.27 to 569.88)          |
| Zambia                                                                                                                                                                                  | 795.16 (709.17 to 884.15)        | 685.95 (615.52 to 765.9)           |
| <b>Southern Sub-Saharan Africa</b>                                                                                                                                                      |                                  |                                    |
| Botswana                                                                                                                                                                                | 734.45 (635.49 to 852.77)        | 646.43 (556.08 to 751.95)          |
| Lesotho                                                                                                                                                                                 | 1484.99 (1347.41 to 1630.21)     | 1219.09 (1094.73 to 1360.7)        |
| Namibia                                                                                                                                                                                 | 898.32 (817.2 to 988.65)         | 771.14 (695.56 to 861.4)           |
| South Africa                                                                                                                                                                            | 869.34 (791.56 to 956.56)        | 659.15 (594.45 to 734.84)          |
| Swaziland                                                                                                                                                                               | 1078.71 (979.27 to 1195.17)      | 893.24 (803.57 to 998.63)          |
| Zimbabwe                                                                                                                                                                                | 1070.51 (941.99 to 1202.41)      | 887.63 (764.47 to 1022.2)          |
| <b>Western Sub-Saharan Africa</b>                                                                                                                                                       |                                  |                                    |
| Benin                                                                                                                                                                                   | 252.94 (228.86 to 279.25)        | 225.86 (203.94 to 250.78)          |
| Burkina Faso                                                                                                                                                                            | 354.09 (323.77 to 383.71)        | 274.67 (252.38 to 301.63)          |
| Cameroon                                                                                                                                                                                | 341.28 (300.75 to 383.47)        | 288.13 (256.54 to 325.51)          |
| Cape Verde                                                                                                                                                                              | 129.83 (117.82 to 143.07)        | 139.25 (126.18 to 152.77)          |
| Chad                                                                                                                                                                                    | 388.48 (357.56 to 421.95)        | 351.32 (324.95 to 381.34)          |
| Cote d'Ivoire                                                                                                                                                                           | 337.93 (309.22 to 369.53)        | 278.42 (253.95 to 307.08)          |
| The Gambia                                                                                                                                                                              | 377.14 (339.36 to 420.75)        | 320.79 (288.06 to 354.01)          |
| Ghana                                                                                                                                                                                   | 381.37 (318.89 to 456.79)        | 282.24 (235.4 to 336.92)           |
| Guinea                                                                                                                                                                                  | 353.74 (324.01 to 387.24)        | 339.66 (312.99 to 368.65)          |
| Guinea-Bissau                                                                                                                                                                           | 341.94 (311.69 to 375.71)        | 296.49 (270.05 to 325.35)          |
| Liberia                                                                                                                                                                                 | 306.72 (280.28 to 336.57)        | 297.24 (272.51 to 323.9)           |
| Mali                                                                                                                                                                                    | 181.05 (166.18 to 197.12)        | 181.89 (165.67 to 199.78)          |
| Mauritania                                                                                                                                                                              | 151.41 (137.58 to 165.89)        | 127.46 (116.14 to 139.99)          |
| Niger                                                                                                                                                                                   | 255.69 (235.17 to 279.54)        | 246.22 (224.25 to 269.82)          |
| Nigeria                                                                                                                                                                                 | 412.22 (376.45 to 450.96)        | 297.29 (272.71 to 322.18)          |
| Sao Tome and Principe                                                                                                                                                                   | 149.35 (136.19 to 163.75)        | 99.88 (90.15 to 109.27)            |
| Senegal                                                                                                                                                                                 | 266.02 (243.2 to 291.85)         | 248.53 (228.58 to 271.25)          |
| Sierra Leone                                                                                                                                                                            | 396.96 (365.72 to 432.83)        | 354.65 (325.83 to 387.9)           |
| Togo                                                                                                                                                                                    | 323.86 (295.93 to 353.04)        | 267.28 (244.63 to 293.46)          |
| <b>Indicator 3.4.1: Age-standardised death rate due to cardiovascular disease, cancer, diabetes, and chronic respiratory disease in populations aged 30-70 (per 100,000 population)</b> |                                  |                                    |
| Central Europe, Eastern Europe, and Central Asia                                                                                                                                        |                                  |                                    |
| Central Asia                                                                                                                                                                            |                                  |                                    |
| Armenia                                                                                                                                                                                 | 602.31 (578.06 to 626.32)        | 271.89 (258.26 to 286.93)          |
| Azerbaijan                                                                                                                                                                              | 818 (746.67 to 898.76)           | 390.94 (353.83 to 430.17)          |
| Georgia                                                                                                                                                                                 | 815.28 (787.04 to 846.28)        | 325.42 (310.88 to 341.26)          |
| Kazakhstan                                                                                                                                                                              | 776.56 (730.06 to 824.57)        | 347.23 (322.78 to 371.48)          |
| Kyrgyzstan                                                                                                                                                                              | 649.48 (625.64 to 675.23)        | 337.82 (323.83 to 351.67)          |
| Mongolia                                                                                                                                                                                | 998.25 (887.21 to 1112.12)       | 483.55 (431.61 to 537.93)          |
| Tajikistan                                                                                                                                                                              | 650.71 (576.15 to 732.15)        | 435.25 (381.07 to 488.08)          |
| Turkmenistan                                                                                                                                                                            | 859.18 (785.05 to 936.57)        | 476.03 (428.98 to 525.83)          |
| Uzbekistan                                                                                                                                                                              | 823.39 (715.42 to 945.32)        | 474.6 (406.68 to 551.39)           |
| Central Europe                                                                                                                                                                          |                                  |                                    |



|                                  | Estimate in 2017, male (95% UIs) | Estimate in 2017, female (95% UIs) |
|----------------------------------|----------------------------------|------------------------------------|
| Albania                          | 383.86 (300.28 to 479.28)        | 186.2 (138.23 to 242.68)           |
| Bosnia and Herzegovina           | 498.28 (459.44 to 537.34)        | 279.28 (255.7 to 304.4)            |
| Bulgaria                         | 725.48 (674.89 to 776.65)        | 331.08 (307.21 to 357.91)          |
| Croatia                          | 441.54 (409.82 to 472.85)        | 196.06 (179.01 to 213.92)          |
| Czech Republic                   | 396.83 (368.93 to 427.05)        | 201.08 (185.64 to 218.37)          |
| Hungary                          | 627.05 (586.31 to 673.03)        | 292.12 (271.03 to 315.7)           |
| Macedonia                        | 540.07 (500.49 to 583.25)        | 296.22 (269.57 to 324.43)          |
| Montenegro                       | 551.37 (492.95 to 619.52)        | 294.65 (267.89 to 323.25)          |
| Poland                           | 511.42 (478.55 to 546.64)        | 235.66 (219.05 to 254.54)          |
| Romania                          | 635.43 (595.42 to 677.94)        | 279.39 (258.85 to 298.49)          |
| Serbia                           | 548.83 (511.48 to 587.85)        | 334.72 (309.74 to 360.11)          |
| Slovakia                         | 494.73 (460.23 to 534.35)        | 231.32 (211.98 to 251.22)          |
| Slovenia                         | 308.78 (283.52 to 335.74)        | 149 (134.68 to 165.2)              |
| <b>Eastern Europe</b>            |                                  |                                    |
| Belarus                          | 769.87 (722.13 to 823.57)        | 271.55 (250.34 to 292.74)          |
| Estonia                          | 486 (418.59 to 559.88)           | 196.97 (166.32 to 231.44)          |
| Latvia                           | 712.47 (622.41 to 810.83)        | 263.14 (222.08 to 309.58)          |
| Lithuania                        | 683.71 (635.44 to 733.93)        | 244.32 (222.81 to 265.7)           |
| Moldova                          | 735.48 (708.65 to 763.42)        | 313.77 (299.27 to 328.3)           |
| Russian Federation               | 807.75 (798.57 to 817.14)        | 321.79 (317.54 to 326.19)          |
| Ukraine                          | 1000.12 (941.85 to 1060.48)      | 348.35 (323.32 to 376.68)          |
| <b>High-income</b>               |                                  |                                    |
| <b>Australasia</b>               |                                  |                                    |
| Australia                        | 235.65 (203.7 to 270.2)          | 148.06 (126.67 to 171.33)          |
| New Zealand                      | 261.65 (243.85 to 279.83)        | 183.93 (171.78 to 197.15)          |
| <b>High-income Asia Pacific</b>  |                                  |                                    |
| Brunei                           | 487.46 (441.71 to 535.98)        | 370.23 (335.59 to 401.99)          |
| Japan                            | 212.78 (205.62 to 220.23)        | 109.97 (106.35 to 113.88)          |
| South Korea                      | 218.56 (198.79 to 238.98)        | 99.58 (90.9 to 108.45)             |
| Singapore                        | 218.17 (201.78 to 236.18)        | 107.02 (97.48 to 117.58)           |
| <b>High-income North America</b> |                                  |                                    |
| Canada                           | 249.42 (232.02 to 267.69)        | 168.71 (156.97 to 182.25)          |
| Greenland                        | 517.51 (490.13 to 542.8)         | 334.5 (309.38 to 360.35)           |
| United States                    | 351.37 (340.47 to 362.57)        | 228.68 (221.17 to 235.97)          |
| <b>Southern Latin America</b>    |                                  |                                    |
| Argentina                        | 422.84 (368.79 to 491.4)         | 254.12 (218.71 to 293.66)          |
| Chile                            | 281.33 (242.49 to 324.69)        | 195.08 (166.05 to 227.21)          |
| Uruguay                          | 454.65 (395.09 to 520.41)        | 258.72 (219.33 to 300.3)           |
| <b>Western Europe</b>            |                                  |                                    |
| Andorra                          | 248.62 (214.95 to 285.9)         | 148.52 (119.55 to 180.26)          |
| Austria                          | 263.34 (243.68 to 283.77)        | 157.96 (145.55 to 171.23)          |
| Belgium                          | 271.26 (251.14 to 291.93)        | 165.45 (152.09 to 180.43)          |
| Cyprus                           | 294.28 (261.72 to 329.92)        | 140.1 (124.12 to 158.48)           |
| Denmark                          | 269.57 (250.02 to 292.12)        | 193.59 (177.86 to 211.31)          |
| Finland                          | 268.32 (249.4 to 290.75)         | 139.04 (127.09 to 152.44)          |
| France                           | 277.82 (258.66 to 298.36)        | 143.92 (133.15 to 155.28)          |
| Germany                          | 315.1 (275.36 to 360.63)         | 180 (153.79 to 208.65)             |



|                                    | Estimate in 2017, male (95% UIs) | Estimate in 2017, female (95% UIs) |
|------------------------------------|----------------------------------|------------------------------------|
| Greece                             | 351.75 (326.1 to 376.85)         | 173.9 (159.63 to 188.44)           |
| Iceland                            | 231.71 (220.12 to 243.08)        | 130.11 (121.7 to 138.98)           |
| Ireland                            | 233.46 (214.22 to 253.02)        | 166.71 (152.6 to 183.76)           |
| Israel                             | 215.29 (199.26 to 233.77)        | 140.31 (128.43 to 152.89)          |
| Italy                              | 226.95 (210.87 to 245.11)        | 136.25 (124.81 to 148)             |
| Luxembourg                         | 243.12 (213.38 to 275.74)        | 169.01 (149.11 to 190.56)          |
| Malta                              | 268.66 (251.46 to 283.84)        | 164.51 (152.54 to 177.64)          |
| Netherlands                        | 242.98 (225.97 to 262.11)        | 195.13 (179.85 to 211.33)          |
| Norway                             | 215.08 (209.09 to 221.76)        | 154.75 (150.24 to 159.41)          |
| Portugal                           | 305.19 (281.54 to 328.1)         | 142.54 (130.86 to 155.18)          |
| Spain                              | 268.16 (249.67 to 286.26)        | 126.45 (117.34 to 136.22)          |
| Sweden                             | 203.64 (190.05 to 217.76)        | 151.45 (140.82 to 163.09)          |
| Switzerland                        | 180.41 (165.92 to 195.19)        | 120.58 (110.24 to 130.92)          |
| United Kingdom                     | 270.08 (265.77 to 274.72)        | 190.07 (186.92 to 194.25)          |
| <b>Latin America and Caribbean</b> |                                  |                                    |
| <b>Andean Latin America</b>        |                                  |                                    |
| Bolivia                            | 357.48 (266.87 to 473.37)        | 350.6 (266.83 to 438.53)           |
| Ecuador                            | 244.44 (215 to 278.29)           | 241.71 (212.66 to 274.47)          |
| Peru                               | 187.28 (149.81 to 226.34)        | 182.15 (146.47 to 222.52)          |
| <b>Caribbean</b>                   |                                  |                                    |
| Antigua and Barbuda                | 336.86 (309.75 to 367.03)        | 292.55 (267.46 to 316.29)          |
| The Bahamas                        | 507.27 (457.3 to 562.4)          | 366.95 (324.92 to 408.88)          |
| Barbados                           | 349.64 (311.85 to 389.85)        | 283.59 (253.36 to 313.02)          |
| Belize                             | 410.8 (390.55 to 430.63)         | 316.89 (301.4 to 332.93)           |
| Bermuda                            | 334.77 (310.89 to 359.82)        | 126.21 (110.89 to 142.71)          |
| Cuba                               | 385.39 (335.33 to 445.74)        | 266.49 (228.76 to 307.13)          |
| Dominica                           | 451.22 (415.39 to 490.93)        | 333.46 (301.41 to 365.87)          |
| Dominican Republic                 | 477.41 (394.61 to 562.6)         | 329.12 (275.87 to 387.36)          |
| Grenada                            | 515.62 (486.07 to 548.08)        | 404.97 (379.5 to 431.29)           |
| Guyana                             | 657.1 (570.74 to 753.73)         | 534.16 (458.44 to 617.44)          |
| Haiti                              | 630.29 (492.25 to 765.86)        | 716.53 (532.41 to 897.56)          |
| Jamaica                            | 478.45 (395.56 to 574.05)        | 367.86 (299.41 to 448.57)          |
| Puerto Rico                        | 293.58 (269.64 to 317.1)         | 180.4 (165.37 to 196.81)           |
| Saint Lucia                        | 431.86 (400.56 to 465.14)        | 328.65 (300.77 to 358.07)          |
| Saint Vincent and the Grenadines   | 524.19 (489.18 to 561.12)        | 406.4 (374.22 to 442.12)           |
| Suriname                           | 533.06 (462.84 to 615.89)        | 342.17 (300.82 to 387.78)          |
| Trinidad and Tobago                | 508.48 (399.15 to 643.46)        | 363.04 (275.19 to 466.49)          |
| Virgin Islands, U.S.               | 646.67 (509.65 to 746.9)         | 301.45 (260.73 to 343.11)          |
| <b>Central Latin America</b>       |                                  |                                    |
| Colombia                           | 230.63 (200.1 to 264.54)         | 184.04 (158.71 to 213.89)          |
| Costa Rica                         | 300 (278.38 to 323.31)           | 183.53 (168.81 to 201.21)          |
| El Salvador                        | 315.56 (252.3 to 386.74)         | 267.2 (212.27 to 334.31)           |
| Guatemala                          | 291.96 (252.63 to 334.07)        | 286.82 (247.18 to 331.13)          |
| Honduras                           | 319.32 (244.25 to 410.21)        | 350.74 (263.9 to 443.86)           |
| Mexico                             | 318.83 (312.14 to 326.17)        | 239.45 (234.47 to 244.58)          |
| Nicaragua                          | 226.2 (193.83 to 266.72)         | 207.95 (176.52 to 242.08)          |
| Panama                             | 239.24 (219.55 to 258.41)        | 191.95 (175.39 to 209.23)          |

|                                               | Estimate in 2017, male (95% UIs) | Estimate in 2017, female (95% UIs) |
|-----------------------------------------------|----------------------------------|------------------------------------|
| Venezuela                                     | 401.72 (329.82 to 478.56)        | 261.29 (212.19 to 315.9)           |
| <b>Tropical Latin America</b>                 |                                  |                                    |
| Brazil                                        | 399.62 (394.38 to 405.15)        | 268.11 (264.49 to 272.45)          |
| Paraguay                                      | 380.28 (298.25 to 469.91)        | 280.72 (219.57 to 349.97)          |
| <b>North Africa and Middle East</b>           |                                  |                                    |
| <b>North Africa and Middle East</b>           |                                  |                                    |
| Afghanistan                                   | 880.32 (729.64 to 1058.01)       | 1045.95 (860.56 to 1251.53)        |
| Algeria                                       | 294.06 (265.22 to 319.36)        | 257.71 (238.6 to 275.88)           |
| Bahrain                                       | 256.44 (227.5 to 287.42)         | 225.04 (201.12 to 251.87)          |
| Egypt                                         | 763.59 (668.73 to 870.29)        | 431.87 (373.07 to 494.46)          |
| Iran                                          | 349.5 (345.53 to 356.68)         | 226.26 (223.44 to 228.87)          |
| Iraq                                          | 318.21 (291.92 to 348.04)        | 228.1 (208.16 to 250.12)           |
| Jordan                                        | 302.53 (261.75 to 355.87)        | 204.41 (176.06 to 232.96)          |
| Kuwait                                        | 242.06 (223.5 to 261)            | 107.86 (99.91 to 115.56)           |
| Lebanon                                       | 437.9 (407.86 to 476.14)         | 288.28 (254.39 to 319.61)          |
| Libya                                         | 520.35 (427.09 to 618.02)        | 424.66 (349.94 to 504.17)          |
| Morocco                                       | 472.04 (374.07 to 585.72)        | 447.92 (358.09 to 546.45)          |
| Palestine                                     | 377.26 (345.8 to 415.04)         | 310.14 (283.38 to 335)             |
| Oman                                          | 375.75 (293.38 to 465.19)        | 261.98 (201.63 to 320.8)           |
| Qatar                                         | 233.78 (187 to 284.45)           | 222.51 (180.12 to 271.49)          |
| Saudi Arabia                                  | 343.72 (291.54 to 411.9)         | 248.71 (212.02 to 291.81)          |
| Sudan                                         | 539.21 (409.91 to 706.05)        | 448.36 (331.97 to 586.27)          |
| Syria                                         | 523.23 (414.13 to 650.72)        | 302.17 (236.64 to 365.8)           |
| Tunisia                                       | 355.89 (269.75 to 453.76)        | 208.49 (155.87 to 273.18)          |
| Turkey                                        | 408.31 (366.07 to 454.08)        | 191.61 (170.17 to 214.81)          |
| United Arab Emirates                          | 609.1 (479.94 to 761.82)         | 424.05 (338.41 to 521.94)          |
| Yemen                                         | 669.2 (512.08 to 854.43)         | 538.2 (411.35 to 722.78)           |
| <b>South Asia</b>                             |                                  |                                    |
| <b>South Asia</b>                             |                                  |                                    |
| Bangladesh                                    | 517.13 (447.68 to 596.45)        | 384.93 (330.97 to 445.28)          |
| Bhutan                                        | 391.23 (302.39 to 507.91)        | 295.47 (233.05 to 370.62)          |
| India                                         | 559.81 (533.8 to 580.93)         | 429.19 (401.61 to 448.17)          |
| Nepal                                         | 554.96 (432.01 to 655.53)        | 359.33 (295.3 to 441.39)           |
| Pakistan                                      | 709.64 (555.92 to 879.33)        | 572.09 (444.37 to 706.21)          |
| <b>Southeast Asia, East Asia, and Oceania</b> |                                  |                                    |
| <b>East Asia</b>                              |                                  |                                    |
| China                                         | 453.13 (431.29 to 474.61)        | 235.56 (223.91 to 248.43)          |
| North Korea                                   | 744.32 (628.93 to 855.27)        | 423.58 (339.5 to 519.82)           |
| Taiwan                                        | 355.25 (332.2 to 380.44)         | 160.94 (149.17 to 173.67)          |
| <b>Oceania</b>                                |                                  |                                    |
| American Samoa                                | 660.77 (555.9 to 761.97)         | 466.55 (422.42 to 512.88)          |
| Federated States of Micronesia                | 956.52 (733.97 to 1167.93)       | 660.49 (518.1 to 827.75)           |
| Fiji                                          | 1011.89 (865.98 to 1179.23)      | 719.14 (593.17 to 855.73)          |
| Guam                                          | 669.72 (609.73 to 730.02)        | 399.62 (363.6 to 439.4)            |
| Kiribati                                      | 1401.23 (1167.85 to 1662.62)     | 738.53 (602.39 to 884.77)          |
| Marshall Islands                              | 1207.89 (1022.26 to 1419)        | 841.88 (703.11 to 1001.3)          |
| Northern Mariana Islands                      | 456.42 (395.88 to 521.48)        | 273.34 (241.62 to 310.35)          |

|                                    | Estimate in 2017, male (95% UIs) | Estimate in 2017, female (95% UIs) |
|------------------------------------|----------------------------------|------------------------------------|
| Papua New Guinea                   | 1521.19 (1256.58 to 1828.01)     | 1145.9 (937.17 to 1394.85)         |
| Samoa                              | 561.34 (475.36 to 634.4)         | 424.62 (346.57 to 496.63)          |
| Solomon Islands                    | 883.2 (748.13 to 1028.57)        | 740.47 (627.32 to 877.31)          |
| Tonga                              | 694.59 (599.34 to 824.66)        | 390.29 (327.67 to 460.2)           |
| Vanuatu                            | 1099.53 (889.14 to 1365.21)      | 749.87 (596.72 to 944.33)          |
| <b>Southeast Asia</b>              |                                  |                                    |
| Cambodia                           | 530.65 (460.04 to 607.45)        | 357.21 (296.91 to 438.74)          |
| Indonesia                          | 595.54 (548.23 to 640.04)        | 419.83 (389.69 to 453)             |
| Laos                               | 646.86 (516.29 to 770.74)        | 488.86 (395.77 to 611.76)          |
| Malaysia                           | 461.58 (411.21 to 526.84)        | 271.38 (240.24 to 306.68)          |
| Maldives                           | 265.56 (244.13 to 286.02)        | 175.82 (159.11 to 192.87)          |
| Mauritius                          | 520.96 (480 to 564.8)            | 307.76 (279.99 to 337.66)          |
| Myanmar                            | 634.56 (544.04 to 715.79)        | 409.92 (327.11 to 504.82)          |
| Philippines                        | 691.02 (572.98 to 820.62)        | 404.97 (332 to 494.77)             |
| Sri Lanka                          | 381.78 (304.61 to 469.08)        | 206.22 (152.64 to 263.6)           |
| Seychelles                         | 543.75 (512.26 to 576.64)        | 294.87 (271.3 to 317.92)           |
| Thailand                           | 336.33 (290.9 to 383.92)         | 176.87 (153.32 to 203.24)          |
| Timor-Leste                        | 534.9 (407.36 to 641.91)         | 408.03 (327.43 to 504.31)          |
| Vietnam                            | 606.39 (529.27 to 722.46)        | 260.88 (203.84 to 322.62)          |
| <b>Sub-Saharan Africa</b>          |                                  |                                    |
| <b>Central Sub-Saharan Africa</b>  |                                  |                                    |
| Angola                             | 521.49 (426.94 to 615.69)        | 377.31 (295.49 to 478.97)          |
| Central African Republic           | 834.16 (650.69 to 1024.22)       | 656.49 (454.36 to 830.37)          |
| Congo                              | 500.79 (404.6 to 598.76)         | 594.27 (455.7 to 729.59)           |
| Democratic Republic of the Congo   | 518.77 (415.31 to 623.21)        | 436.29 (339.07 to 554.84)          |
| Equatorial Guinea                  | 398.48 (288.99 to 524.98)        | 303.83 (182.7 to 471.76)           |
| Gabon                              | 543.28 (467.74 to 630.4)         | 314.81 (235.83 to 405.45)          |
| <b>Eastern Sub-Saharan Africa</b>  |                                  |                                    |
| Burundi                            | 480.96 (383.55 to 591.24)        | 443.23 (339.03 to 551.07)          |
| Comoros                            | 457.56 (364.89 to 545.45)        | 418.82 (332.07 to 528.64)          |
| Djibouti                           | 497.88 (369.62 to 646.39)        | 398.4 (277.17 to 575.24)           |
| Eritrea                            | 724.17 (569.14 to 884.35)        | 532.58 (405.65 to 654.9)           |
| Ethiopia                           | 333.15 (296.58 to 368.03)        | 301.55 (267.19 to 335.23)          |
| Kenya                              | 424.34 (387.21 to 469.07)        | 301.82 (273.17 to 329.11)          |
| Madagascar                         | 656.88 (508.99 to 811.61)        | 581 (441.68 to 737.74)             |
| Malawi                             | 525.63 (438.22 to 605.82)        | 320.11 (252 to 406.3)              |
| Mozambique                         | 745.89 (623.51 to 873.63)        | 440.64 (334.38 to 549.88)          |
| Rwanda                             | 368.6 (305.27 to 435.22)         | 295.53 (238.54 to 361.93)          |
| Somalia                            | 646.97 (493.82 to 822.8)         | 598.63 (449.53 to 780.32)          |
| South Sudan                        | 548.51 (411.61 to 711.76)        | 451.16 (327.78 to 613.59)          |
| Tanzania                           | 397.64 (331.47 to 471.54)        | 322.26 (269.04 to 386.5)           |
| Uganda                             | 494.89 (404.91 to 579.17)        | 308.26 (247.64 to 381.53)          |
| Zambia                             | 490.75 (419.61 to 568.73)        | 375.85 (296.38 to 459.4)           |
| <b>Southern Sub-Saharan Africa</b> |                                  |                                    |
| Botswana                           | 342.38 (304.36 to 425.81)        | 355.31 (307.48 to 406.26)          |
| Lesotho                            | 965.39 (813.84 to 1127.68)       | 589.98 (399.4 to 766.84)           |
| Namibia                            | 511.62 (440.76 to 596.97)        | 277.74 (217.47 to 367.83)          |

|                                                                                               | Estimate in 2017, male (95% UIs) | Estimate in 2017, female (95% UIs) |
|-----------------------------------------------------------------------------------------------|----------------------------------|------------------------------------|
| South Africa                                                                                  | 493.07 (471.81 to 513.43)        | 307.77 (294.09 to 321.84)          |
| Swaziland                                                                                     | 906.99 (738.85 to 1093.47)       | 475.53 (317.64 to 648.84)          |
| Zimbabwe                                                                                      | 627.71 (526.43 to 736.79)        | 551.59 (436.83 to 668.27)          |
| <b>Western Sub-Saharan Africa</b>                                                             |                                  |                                    |
| Benin                                                                                         | 415.4 (320.11 to 529.53)         | 372.28 (284.24 to 485.03)          |
| Burkina Faso                                                                                  | 497.86 (415.11 to 592.14)        | 381.4 (315.67 to 455.32)           |
| Cameroon                                                                                      | 479.67 (368.67 to 595.08)        | 392.84 (291.7 to 526.94)           |
| Cape Verde                                                                                    | 354.95 (315.17 to 398.6)         | 222.25 (199.95 to 236.73)          |
| Chad                                                                                          | 451.89 (364.55 to 556.12)        | 441.01 (348.77 to 555.59)          |
| Cote d'Ivoire                                                                                 | 489.17 (391.73 to 601.15)        | 416.98 (324.62 to 530.59)          |
| The Gambia                                                                                    | 564.24 (452.65 to 681.46)        | 465.12 (361.85 to 584.07)          |
| Ghana                                                                                         | 467.63 (402.7 to 531.91)         | 442.83 (360.47 to 539.22)          |
| Guinea                                                                                        | 603.42 (482.46 to 732.04)        | 555.85 (450.61 to 670.28)          |
| Guinea-Bissau                                                                                 | 709.06 (584.51 to 856.32)        | 608.21 (468.86 to 739.78)          |
| Liberia                                                                                       | 399.7 (319.13 to 500.94)         | 431.66 (333.9 to 539.55)           |
| Mali                                                                                          | 417.37 (326.47 to 517.52)        | 452.16 (368.93 to 555.45)          |
| Mauritania                                                                                    | 327.8 (255.74 to 405.74)         | 400.82 (316.66 to 502.8)           |
| Niger                                                                                         | 391.33 (301.82 to 536.43)        | 392.13 (304.04 to 492.48)          |
| Nigeria                                                                                       | 254.12 (192.05 to 359.11)        | 284.09 (187.94 to 407.98)          |
| Sao Tome and Principe                                                                         | 458.39 (381.02 to 537.89)        | 424.72 (349.6 to 505.28)           |
| Senegal                                                                                       | 434.72 (360.2 to 511.96)         | 400.71 (323.75 to 485.61)          |
| Sierra Leone                                                                                  | 475.4 (382.74 to 582.03)         | 514.32 (405.67 to 647.75)          |
| Togo                                                                                          | 524.17 (413.66 to 635.37)        | 379.79 (293.71 to 489.29)          |
| <b>Indicator 3.4.2: Age-standardised death rate due to self-harm (per 100,000 population)</b> |                                  |                                    |
| Central Europe, Eastern Europe, and Central Asia                                              |                                  |                                    |
| Central Asia                                                                                  |                                  |                                    |
| Armenia                                                                                       | 13.81 (12.84 to 14.84)           | 3.25 (3 to 3.5)                    |
| Azerbaijan                                                                                    | 6.78 (4.62 to 8.04)              | 1.58 (1.34 to 1.82)                |
| Georgia                                                                                       | 13.35 (12.18 to 14.52)           | 2.18 (2 to 2.36)                   |
| Kazakhstan                                                                                    | 39.63 (35.85 to 44.27)           | 7.67 (7.01 to 8.34)                |
| Kyrgyzstan                                                                                    | 16.35 (14.83 to 18.65)           | 3.91 (3.58 to 4.23)                |
| Mongolia                                                                                      | 25.94 (21.36 to 30.64)           | 4.82 (4.08 to 5.62)                |
| Tajikistan                                                                                    | 8.19 (6.51 to 9.55)              | 3.15 (2.71 to 3.66)                |
| Turkmenistan                                                                                  | 13.29 (11.76 to 14.96)           | 3.52 (3.11 to 3.94)                |
| Uzbekistan                                                                                    | 14.15 (11.98 to 16.56)           | 4.7 (4 to 5.6)                     |
| <b>Central Europe</b>                                                                         |                                  |                                    |
| Albania                                                                                       | 7.21 (4.94 to 9.39)              | 2.88 (2.19 to 3.72)                |
| Bosnia and Herzegovina                                                                        | 11.19 (9.73 to 14.52)            | 2.59 (2.3 to 2.9)                  |
| Bulgaria                                                                                      | 15.61 (14.22 to 17)              | 3.63 (3.28 to 4)                   |
| Croatia                                                                                       | 18.18 (16.68 to 19.78)           | 4.41 (3.95 to 4.87)                |
| Czech Republic                                                                                | 17.83 (16.4 to 19.42)            | 3.69 (3.34 to 4.07)                |
| Hungary                                                                                       | 23.51 (21.72 to 25.49)           | 5.9 (5.37 to 6.46)                 |
| Macedonia                                                                                     | 10.38 (8.97 to 11.88)            | 3.31 (2.89 to 3.77)                |
| Montenegro                                                                                    | 13.66 (11.32 to 16.01)           | 5.09 (4.39 to 5.88)                |
| Poland                                                                                        | 24.59 (22.47 to 26.89)           | 3.3 (3 to 3.63)                    |
| Romania                                                                                       | 15.77 (14.51 to 17.06)           | 2.51 (2.27 to 2.74)                |

|                                  | Estimate in 2017, male (95% UIs) | Estimate in 2017, female (95% UIs) |
|----------------------------------|----------------------------------|------------------------------------|
| Serbia                           | 19.77 (17.58 to 22.95)           | 5.79 (5.19 to 6.46)                |
| Slovakia                         | 16.35 (13.51 to 19.3)            | 2.84 (2.5 to 3.23)                 |
| Slovenia                         | 24.22 (21.77 to 26.48)           | 4.59 (4.05 to 5.22)                |
| <b>Eastern Europe</b>            |                                  |                                    |
| Belarus                          | 34.43 (30.41 to 39.32)           | 5.72 (5.13 to 6.35)                |
| Estonia                          | 22.85 (19 to 27.31)              | 3.42 (2.81 to 4.12)                |
| Latvia                           | 30.98 (26.4 to 35.88)            | 4.37 (3.62 to 5.23)                |
| Lithuania                        | 50.42 (46.07 to 54.98)           | 7.41 (6.62 to 8.25)                |
| Moldova                          | 24.63 (22.77 to 26.41)           | 3.41 (3.14 to 3.71)                |
| Russian Federation               | 44.03 (42.27 to 45.55)           | 7.71 (7.48 to 7.95)                |
| Ukraine                          | 46.48 (42.26 to 52.09)           | 6.53 (5.87 to 7.16)                |
| <b>High-income</b>               |                                  |                                    |
| <b>Australasia</b>               |                                  |                                    |
| Australia                        | 17.02 (14.6 to 19.7)             | 4.87 (4.12 to 5.68)                |
| New Zealand                      | 17.27 (15.88 to 18.73)           | 5.32 (4.88 to 5.81)                |
| <b>High-income Asia Pacific</b>  |                                  |                                    |
| Brunei                           | 9.07 (7.47 to 10.67)             | 3.06 (2.62 to 3.48)                |
| Japan                            | 22.25 (21.06 to 24.08)           | 8.59 (8.2 to 8.98)                 |
| South Korea                      | 30.34 (26.9 to 34.15)            | 11.83 (10.69 to 12.97)             |
| Singapore                        | 10.06 (9.06 to 11.17)            | 4.61 (4.16 to 5.13)                |
| <b>High-income North America</b> |                                  |                                    |
| Canada                           | 16.11 (14.7 to 17.62)            | 5.47 (4.97 to 6.04)                |
| Greenland                        | 73.63 (66.49 to 84.35)           | 24.7 (22.04 to 27.55)              |
| United States                    | 19.88 (18.72 to 20.72)           | 5.62 (5.38 to 5.88)                |
| <b>Southern Latin America</b>    |                                  |                                    |
| Argentina                        | 17.58 (14.97 to 20.63)           | 3.9 (3.33 to 4.57)                 |
| Chile                            | 16.71 (14.25 to 19.49)           | 3.63 (3.06 to 4.25)                |
| Uruguay                          | 27.85 (23.83 to 32.18)           | 6.63 (5.48 to 7.81)                |
| <b>Western Europe</b>            |                                  |                                    |
| Andorra                          | 12.34 (9.59 to 15.63)            | 2.96 (2.41 to 3.58)                |
| Austria                          | 17.46 (15.9 to 19.26)            | 5.07 (4.58 to 5.63)                |
| Belgium                          | 20.82 (19.05 to 22.8)            | 7.52 (6.81 to 8.25)                |
| Cyprus                           | 7.5 (6.29 to 8.84)               | 1.68 (1.44 to 1.95)                |
| Denmark                          | 13.04 (11.82 to 14.32)           | 4.4 (3.97 to 4.87)                 |
| Finland                          | 19.66 (17.91 to 21.71)           | 5.82 (5.21 to 6.43)                |
| France                           | 19.56 (17.75 to 21.66)           | 5.48 (4.94 to 6.04)                |
| Germany                          | 15.06 (13.15 to 17.41)           | 4.67 (3.94 to 5.49)                |
| Greece                           | 5.71 (5.23 to 6.3)               | 1.27 (1.14 to 1.42)                |
| Iceland                          | 16.37 (15.17 to 17.67)           | 2.59 (2.36 to 2.83)                |
| Ireland                          | 13.58 (12.07 to 15.28)           | 2.99 (2.64 to 3.37)                |
| Israel                           | 9.34 (8.44 to 10.4)              | 2.09 (1.87 to 2.33)                |
| Italy                            | 7.58 (6.86 to 8.43)              | 1.99 (1.8 to 2.21)                 |
| Luxembourg                       | 12.78 (10.85 to 15.14)           | 4.51 (3.86 to 5.22)                |
| Malta                            | 7.53 (6.9 to 8.19)               | 1.46 (1.32 to 1.62)                |
| Netherlands                      | 12.61 (11.66 to 13.67)           | 5.52 (5.03 to 6.07)                |
| Norway                           | 12.91 (12.13 to 14.05)           | 5.22 (4.99 to 5.45)                |
| Portugal                         | 12.91 (11.43 to 14.43)           | 2.98 (2.67 to 3.34)                |

|                                     | Estimate in 2017, male (95% UIs) | Estimate in 2017, female (95% UIs) |
|-------------------------------------|----------------------------------|------------------------------------|
| Spain                               | 8.53 (7.76 to 9.41)              | 2.53 (2.3 to 2.79)                 |
| Sweden                              | 15.45 (14.31 to 16.78)           | 6.26 (5.73 to 6.84)                |
| Switzerland                         | 13.66 (12.28 to 15.47)           | 4.88 (4.39 to 5.39)                |
| United Kingdom                      | 11.21 (10.82 to 11.53)           | 3.29 (3.2 to 3.39)                 |
| <b>Latin America and Caribbean</b>  |                                  |                                    |
| <b>Andean Latin America</b>         |                                  |                                    |
| Bolivia                             | 8.62 (5.81 to 11.35)             | 4.07 (2.98 to 5.19)                |
| Ecuador                             | 13.84 (11.83 to 16.15)           | 4.42 (3.82 to 5.13)                |
| Peru                                | 4.71 (3.48 to 5.94)              | 1.49 (1.18 to 1.85)                |
| <b>Caribbean</b>                    |                                  |                                    |
| Antigua and Barbuda                 | 4.44 (3.91 to 5.02)              | 0.91 (0.8 to 1.05)                 |
| The Bahamas                         | 5.43 (4.71 to 6.24)              | 1.03 (0.88 to 1.19)                |
| Barbados                            | 6.8 (5.91 to 7.77)               | 1.35 (1.18 to 1.54)                |
| Belize                              | 13.63 (12.37 to 15.01)           | 1.8 (1.65 to 1.97)                 |
| Bermuda                             | 6.33 (5.59 to 7.18)              | 0.83 (0.71 to 0.96)                |
| Cuba                                | 17.85 (15.24 to 20.92)           | 4.64 (3.98 to 5.41)                |
| Dominica                            | 7.49 (6.69 to 8.47)              | 1.38 (1.2 to 1.57)                 |
| Dominican Republic                  | 14.61 (10.25 to 17.92)           | 2.98 (2.46 to 3.59)                |
| Grenada                             | 7.55 (6.83 to 8.3)               | 1.84 (1.66 to 2.05)                |
| Guyana                              | 42.4 (35.66 to 49.46)            | 9.92 (8.26 to 11.84)               |
| Haiti                               | 13.18 (9.1 to 18.25)             | 4.17 (3.17 to 6.26)                |
| Jamaica                             | 6.11 (4.18 to 7.71)              | 1.08 (0.85 to 1.35)                |
| Puerto Rico                         | 10.9 (9.77 to 12.13)             | 1.57 (1.39 to 1.77)                |
| Saint Lucia                         | 12.28 (10.93 to 13.63)           | 1.44 (1.28 to 1.63)                |
| Saint Vincent and the Grenadines    | 12.41 (11.05 to 13.86)           | 1.55 (1.38 to 1.74)                |
| Suriname                            | 39.38 (33.4 to 46.02)            | 10.37 (8.92 to 11.97)              |
| Trinidad and Tobago                 | 16.45 (12.56 to 21.16)           | 3.39 (2.43 to 4.48)                |
| Virgin Islands, U.S.                | 11.15 (9.24 to 13.02)            | 2.04 (1.68 to 2.45)                |
| <b>Central Latin America</b>        |                                  |                                    |
| Colombia                            | 9.29 (7.84 to 10.9)              | 1.8 (1.54 to 2.12)                 |
| Costa Rica                          | 13.85 (12.12 to 15.36)           | 2 (1.78 to 2.27)                   |
| El Salvador                         | 17.29 (13.32 to 23.19)           | 3.54 (2.74 to 4.56)                |
| Guatemala                           | 10 (8.47 to 11.69)               | 2.21 (1.89 to 2.59)                |
| Honduras                            | 7.15 (4.76 to 10.49)             | 1.73 (1.26 to 2.26)                |
| Mexico                              | 9.92 (9.37 to 10.28)             | 2.02 (1.95 to 2.09)                |
| Nicaragua                           | 9.13 (7.34 to 11.28)             | 2.65 (2.17 to 3.21)                |
| Panama                              | 8.31 (7.3 to 9.29)               | 1.49 (1.31 to 1.68)                |
| Venezuela                           | 15.23 (12.12 to 18.62)           | 2.02 (1.61 to 2.48)                |
| <b>Tropical Latin America</b>       |                                  |                                    |
| Brazil                              | 10.07 (9.39 to 10.42)            | 2.21 (2.15 to 2.27)                |
| Paraguay                            | 8.46 (5.22 to 11.08)             | 2.86 (2.2 to 3.62)                 |
| <b>North Africa and Middle East</b> |                                  |                                    |
| <b>North Africa and Middle East</b> |                                  |                                    |
| Afghanistan                         | 13.72 (10.33 to 20.63)           | 4.54 (3.43 to 5.86)                |
| Algeria                             | 5.87 (4.49 to 7.25)              | 2.19 (1.88 to 2.53)                |
| Bahrain                             | 5.57 (4.39 to 6.99)              | 1.71 (1.45 to 1.99)                |
| Egypt                               | 7.94 (5.13 to 10.38)             | 2.66 (2.16 to 3.31)                |

|                                        | Estimate in 2017, male (95% UIs) | Estimate in 2017, female (95% UIs) |
|----------------------------------------|----------------------------------|------------------------------------|
| Iran                                   | 7.55 (6.18 to 8.12)              | 3.09 (2.83 to 3.31)                |
| Iraq                                   | 5.49 (4.7 to 6.53)               | 2.45 (2.11 to 2.82)                |
| Jordan                                 | 4.76 (3.89 to 5.66)              | 1.26 (1.05 to 1.5)                 |
| Kuwait                                 | 3.67 (3.16 to 4.34)              | 0.9 (0.8 to 1.01)                  |
| Lebanon                                | 7.33 (5.47 to 8.86)              | 2.11 (1.7 to 2.56)                 |
| Libya                                  | 12 (6.73 to 16.87)               | 3.59 (2.74 to 4.47)                |
| Morocco                                | 6.86 (4.94 to 9.17)              | 7.15 (5.53 to 9.08)                |
| Palestine                              | 5.35 (3.47 to 6.13)              | 1.52 (1.35 to 1.71)                |
| Oman                                   | 3.78 (2.8 to 5)                  | 1.18 (0.95 to 1.45)                |
| Qatar                                  | 5.72 (4.21 to 7.45)              | 1.11 (0.86 to 1.4)                 |
| Saudi Arabia                           | 4.31 (3.13 to 5.65)              | 0.85 (0.65 to 1.1)                 |
| Sudan                                  | 7.33 (5.18 to 9.84)              | 2.5 (1.8 to 3.39)                  |
| Syria                                  | 4.86 (3.51 to 6.34)              | 1.15 (0.92 to 1.47)                |
| Tunisia                                | 4.66 (3.27 to 6.3)               | 1.51 (1.11 to 2)                   |
| Turkey                                 | 5.25 (4.41 to 6.13)              | 1.31 (1.13 to 1.5)                 |
| United Arab Emirates                   | 6.29 (4.34 to 8.16)              | 1.77 (1.32 to 2.29)                |
| Yemen                                  | 8.22 (5.62 to 11.88)             | 3.61 (2.63 to 4.89)                |
| South Asia                             |                                  |                                    |
| South Asia                             |                                  |                                    |
| Bangladesh                             | 6.12 (4.64 to 7.49)              | 5.62 (4.56 to 6.79)                |
| Bhutan                                 | 8.01 (5.51 to 10.62)             | 2.96 (2.14 to 3.81)                |
| India                                  | 17.62 (12.83 to 19.59)           | 13.07 (12.08 to 13.89)             |
| Nepal                                  | 10.42 (6.55 to 14.19)            | 6.3 (4.73 to 7.94)                 |
| Pakistan                               | 4.41 (3.24 to 5.8)               | 4.31 (3.16 to 5.49)                |
| Southeast Asia, East Asia, and Oceania |                                  |                                    |
| East Asia                              |                                  |                                    |
| China                                  | 8.65 (7.93 to 9.86)              | 5.54 (5.19 to 5.91)                |
| North Korea                            | 15.84 (11.13 to 22.02)           | 6.98 (5.35 to 9.32)                |
| Taiwan                                 | 18.31 (16.87 to 19.84)           | 8.45 (7.72 to 9.26)                |
| Oceania                                |                                  |                                    |
| American Samoa                         | 9.69 (8.23 to 11.02)             | 3.6 (3.09 to 4.14)                 |
| Federated States of Micronesia         | 25.32 (15.72 to 34.75)           | 8.1 (5.44 to 10.91)                |
| Fiji                                   | 13.38 (10.93 to 16.29)           | 5.91 (4.78 to 7.17)                |
| Guam                                   | 32.63 (28.16 to 36.78)           | 6.88 (6 to 7.8)                    |
| Kiribati                               | 46.89 (34.59 to 59.44)           | 6.84 (4.99 to 8.94)                |
| Marshall Islands                       | 32.03 (21.5 to 42.27)            | 11.58 (8.77 to 15.63)              |
| Northern Mariana Islands               | 20.2 (16.86 to 23.63)            | 3.24 (2.74 to 3.84)                |
| Papua New Guinea                       | 34.14 (18.54 to 49.41)           | 10.6 (7.65 to 14.85)               |
| Samoa                                  | 14.53 (10.9 to 18.94)            | 5.01 (3.6 to 6.38)                 |
| Solomon Islands                        | 23.38 (16.39 to 31.37)           | 8.71 (6.42 to 12.17)               |
| Tonga                                  | 7.8 (6.07 to 9.31)               | 3.85 (3.07 to 4.7)                 |
| Vanuatu                                | 27.37 (16.26 to 38.22)           | 7.41 (5.28 to 10.05)               |
| Southeast Asia                         |                                  |                                    |
| Cambodia                               | 7.03 (5.49 to 8.65)              | 2.32 (1.88 to 2.91)                |
| Indonesia                              | 4.63 (3.99 to 5.22)              | 1.52 (1.4 to 1.66)                 |
| Laos                                   | 12.61 (7.74 to 17.57)            | 4.03 (3.09 to 4.99)                |
| Malaysia                               | 11.22 (9.62 to 13.5)             | 3.96 (3.46 to 4.55)                |



|                                    | Estimate in 2017, male (95% UIs) | Estimate in 2017, female (95% UIs) |
|------------------------------------|----------------------------------|------------------------------------|
| Maldives                           | 4.63 (3.72 to 5.57)              | 1.37 (1.05 to 1.68)                |
| Mauritius                          | 13.42 (11.87 to 14.93)           | 3.05 (2.72 to 3.44)                |
| Myanmar                            | 8.59 (5.82 to 10.87)             | 1.78 (1.41 to 2.17)                |
| Philippines                        | 8.92 (7.32 to 10.73)             | 2.88 (2.38 to 3.49)                |
| Sri Lanka                          | 33.53 (25.57 to 45.87)           | 7.4 (5.76 to 9.24)                 |
| Seychelles                         | 13.27 (11.53 to 17.59)           | 2.3 (2.04 to 2.59)                 |
| Thailand                           | 16.9 (13.69 to 19.75)            | 3.88 (3.28 to 4.54)                |
| Timor-Leste                        | 10.49 (5.6 to 14.92)             | 3.97 (2.41 to 5.08)                |
| Vietnam                            | 10.41 (7.79 to 12.5)             | 4.44 (3.53 to 5.54)                |
| <b>Sub-Saharan Africa</b>          |                                  |                                    |
| <b>Central Sub-Saharan Africa</b>  |                                  |                                    |
| Angola                             | 20.51 (15.89 to 25.14)           | 4.49 (3.43 to 5.64)                |
| Central African Republic           | 27.51 (18.25 to 36.23)           | 6.59 (4.58 to 9.13)                |
| Congo                              | 20.64 (14.37 to 27.33)           | 7.45 (5.27 to 9.73)                |
| Democratic Republic of the Congo   | 19.48 (15.25 to 24.3)            | 4.5 (3.4 to 5.84)                  |
| Equatorial Guinea                  | 15.1 (10.25 to 21.25)            | 4.39 (2.62 to 6.44)                |
| Gabon                              | 21.73 (14.75 to 28.51)           | 4.12 (2.99 to 5.28)                |
| <b>Eastern Sub-Saharan Africa</b>  |                                  |                                    |
| Burundi                            | 19.35 (14.31 to 25.52)           | 5.63 (4.42 to 7.33)                |
| Comoros                            | 13.29 (8.08 to 24)               | 3.74 (2.56 to 5.03)                |
| Djibouti                           | 12.28 (6.8 to 21.85)             | 3.92 (2.27 to 6.1)                 |
| Eritrea                            | 26.79 (18.91 to 35.68)           | 7.22 (5.18 to 9.54)                |
| Ethiopia                           | 14.19 (11.97 to 16.82)           | 4.47 (3.79 to 5.21)                |
| Kenya                              | 19.02 (16.28 to 22.98)           | 3.98 (3.5 to 4.52)                 |
| Madagascar                         | 16.92 (12.15 to 22.03)           | 5.08 (3.95 to 6.43)                |
| Malawi                             | 22.1 (17.58 to 26.62)            | 3.9 (3.01 to 4.88)                 |
| Mozambique                         | 30.83 (23.06 to 38.75)           | 6 (4.63 to 7.61)                   |
| Rwanda                             | 18.78 (14.19 to 24.17)           | 5.09 (3.85 to 6.55)                |
| Somalia                            | 14.62 (9.45 to 24.86)            | 5.21 (3.08 to 7.75)                |
| South Sudan                        | 18.35 (12.58 to 25.81)           | 4.45 (2.68 to 6.72)                |
| Tanzania                           | 14.04 (10.89 to 17.55)           | 3.9 (3.09 to 4.81)                 |
| Uganda                             | 15.47 (12.31 to 19.57)           | 7.97 (6.37 to 10.02)               |
| Zambia                             | 21 (16.93 to 25.01)              | 5.36 (4.28 to 6.61)                |
| <b>Southern Sub-Saharan Africa</b> |                                  |                                    |
| Botswana                           | 15.1 (10.14 to 24.19)            | 5.25 (4.17 to 6.37)                |
| Lesotho                            | 41.1 (29.1 to 54.96)             | 20.66 (14.14 to 28.22)             |
| Namibia                            | 21.97 (16.24 to 30.15)           | 2.89 (2.11 to 3.86)                |
| South Africa                       | 18.29 (15.89 to 20.77)           | 4.41 (3.99 to 4.85)                |
| Swaziland                          | 39.42 (27.78 to 51.81)           | 6.87 (4.63 to 9.83)                |
| Zimbabwe                           | 40.29 (30.52 to 49.07)           | 14.21 (10.99 to 17.87)             |
| <b>Western Sub-Saharan Africa</b>  |                                  |                                    |
| Benin                              | 16.8 (12.79 to 22.14)            | 5.76 (4.21 to 7.64)                |
| Burkina Faso                       | 21.49 (17.4 to 26.29)            | 5.79 (4.71 to 6.93)                |
| Cameroon                           | 20.42 (15.66 to 25.81)           | 7.55 (5.54 to 9.98)                |
| Cape Verde                         | 27.08 (21.98 to 31.32)           | 6.01 (5.29 to 6.68)                |
| Chad                               | 14.43 (10.31 to 22.75)           | 7.08 (4.54 to 9.93)                |
| Cote d'Ivoire                      | 21.15 (16.78 to 26.54)           | 5.55 (4.26 to 7.08)                |



|                                                                                                                                              | Estimate in 2017, male (95% UIs) | Estimate in 2017, female (95% UIs) |
|----------------------------------------------------------------------------------------------------------------------------------------------|----------------------------------|------------------------------------|
| The Gambia                                                                                                                                   | 13.83 (8.67 to 23.04)            | 5.62 (4.45 to 7.1)                 |
| Ghana                                                                                                                                        | 19.07 (14.99 to 22.59)           | 1.81 (1.5 to 2.19)                 |
| Guinea                                                                                                                                       | 15.65 (10.74 to 23.41)           | 6.51 (4.47 to 8.72)                |
| Guinea-Bissau                                                                                                                                | 20.92 (16.25 to 26.94)           | 6.88 (4.53 to 9.73)                |
| Liberia                                                                                                                                      | 14.88 (10.99 to 20.6)            | 11.02 (8.53 to 13.89)              |
| Mali                                                                                                                                         | 10.08 (5.81 to 22.77)            | 3.19 (2.16 to 4.31)                |
| Mauritania                                                                                                                                   | 10.11 (5.81 to 19.19)            | 3.01 (2.08 to 4.06)                |
| Niger                                                                                                                                        | 10.93 (6.84 to 23.56)            | 4.21 (2.8 to 5.69)                 |
| Nigeria                                                                                                                                      | 9.88 (6.79 to 15.23)             | 5.09 (3.15 to 7.72)                |
| Sao Tome and Principe                                                                                                                        | 5.04 (3.12 to 6.87)              | 1.95 (1.5 to 2.42)                 |
| Senegal                                                                                                                                      | 20.97 (16.29 to 26.44)           | 5.07 (4.18 to 6.11)                |
| Sierra Leone                                                                                                                                 | 12.99 (9.24 to 20.17)            | 6.45 (4.34 to 8.82)                |
| Togo                                                                                                                                         | 20.2 (15.75 to 25.26)            | 5.65 (4.26 to 7.31)                |
| <b>Indicator 3.5.2: Risk-weighted prevalence of alcohol consumption, as measured by the summary exposure value (SEV) for alcohol use (%)</b> |                                  |                                    |
| Central Europe, Eastern Europe, and Central Asia                                                                                             |                                  |                                    |
| Central Asia                                                                                                                                 |                                  |                                    |
| Armenia                                                                                                                                      | 16.59 (8.71 to 27.09)            | 7.4 (4.21 to 11.93)                |
| Azerbaijan                                                                                                                                   | 23.91 (13.64 to 35.09)           | 6.43 (3.24 to 10.63)               |
| Georgia                                                                                                                                      | 31.91 (19.01 to 46.95)           | 4.08 (1.68 to 7.9)                 |
| Kazakhstan                                                                                                                                   | 29.33 (17.74 to 41.89)           | 15.48 (8.69 to 24.39)              |
| Kyrgyzstan                                                                                                                                   | 23.36 (14.11 to 33)              | 7.73 (4.24 to 12.61)               |
| Mongolia                                                                                                                                     | 20.82 (12.26 to 32.67)           | 8.11 (4.2 to 14.35)                |
| Tajikistan                                                                                                                                   | 9.02 (4.37 to 16.5)              | 2.81 (1.21 to 5.53)                |
| Turkmenistan                                                                                                                                 | 20.22 (11.03 to 33)              | 6.52 (3.21 to 11.67)               |
| Uzbekistan                                                                                                                                   | 19.71 (11.3 to 31)               | 6.09 (3.1 to 10.74)                |
| Central Europe                                                                                                                               |                                  |                                    |
| Albania                                                                                                                                      | 21.7 (12.93 to 30.89)            | 7.77 (4.47 to 11.86)               |
| Bosnia and Herzegovina                                                                                                                       | 30.23 (23.23 to 37.95)           | 11.65 (7.88 to 15.52)              |
| Bulgaria                                                                                                                                     | 32.15 (19.9 to 46.97)            | 12.65 (6.66 to 21.82)              |
| Croatia                                                                                                                                      | 31.76 (18.79 to 47.04)           | 10.09 (5.08 to 17.75)              |
| Czech Republic                                                                                                                               | 35.95 (23.74 to 50.41)           | 17.46 (10.25 to 27.75)             |
| Hungary                                                                                                                                      | 37.25 (24.84 to 52.07)           | 14.81 (8.24 to 24.06)              |
| Macedonia                                                                                                                                    | 12.09 (6.02 to 20.8)             | 4.75 (1.93 to 9.01)                |
| Montenegro                                                                                                                                   | 35.89 (22.58 to 49.38)           | 14.08 (8.11 to 22.23)              |
| Poland                                                                                                                                       | 32.68 (20.77 to 47.06)           | 14.42 (8.16 to 24.09)              |
| Romania                                                                                                                                      | 48.17 (36.09 to 59.94)           | 14.33 (8.12 to 23.04)              |
| Serbia                                                                                                                                       | 37.79 (24.95 to 52.07)           | 15.47 (8.87 to 24.74)              |
| Slovakia                                                                                                                                     | 35.13 (21.96 to 49.99)           | 13.4 (7 to 23.43)                  |
| Slovenia                                                                                                                                     | 14.76 (3.66 to 28.92)            | 6.48 (1.44 to 14.15)               |
| Eastern Europe                                                                                                                               |                                  |                                    |
| Belarus                                                                                                                                      | 47.18 (34.2 to 60.94)            | 21.13 (12.55 to 33.04)             |
| Estonia                                                                                                                                      | 43.74 (28.93 to 59.15)           | 17.84 (9.74 to 28.25)              |
| Latvia                                                                                                                                       | 40 (26.07 to 54.87)              | 15.55 (8.59 to 24.97)              |
| Lithuania                                                                                                                                    | 47.02 (34.54 to 59.86)           | 18.84 (11.23 to 29.36)             |
| Moldova                                                                                                                                      | 35.16 (18.86 to 52.21)           | 13.74 (7.21 to 22.73)              |

|                                    | Estimate in 2017, male (95% UIs) | Estimate in 2017, female (95% UIs) |
|------------------------------------|----------------------------------|------------------------------------|
| Russian Federation                 | 35.67 (23.72 to 48.93)           | 15.12 (8.7 to 23.64)               |
| Ukraine                            | 46.26 (33.99 to 59.41)           | 27.78 (16.09 to 40.45)             |
| <b>High-income</b>                 |                                  |                                    |
| <b>Australasia</b>                 |                                  |                                    |
| Australia                          | 34.44 (21.92 to 49.07)           | 14.69 (8.1 to 24.29)               |
| New Zealand                        | 38.22 (24.78 to 50.93)           | 8.76 (4.22 to 16.35)               |
| <b>High-income Asia Pacific</b>    |                                  |                                    |
| Brunei                             | 3.65 (1.1 to 8.83)               | 2.26 (0.7 to 5.58)                 |
| Japan                              | 19.12 (10.5 to 30.92)            | 15.26 (8.32 to 25.23)              |
| South Korea                        | 22.69 (12.49 to 35.34)           | 16.07 (8.69 to 25.36)              |
| Singapore                          | 14.63 (7.32 to 25.7)             | 8.94 (4.33 to 16.27)               |
| <b>High-income North America</b>   |                                  |                                    |
| Canada                             | 25.52 (15.46 to 38.19)           | 17.57 (10.2 to 27.71)              |
| Greenland                          | 17.13 (9.2 to 28.53)             | 12 (5.81 to 21.25)                 |
| United States                      | 27.31 (17.65 to 39.25)           | 15.52 (9.17 to 24.03)              |
| <b>Southern Latin America</b>      |                                  |                                    |
| Argentina                          | 27.55 (16.15 to 42.51)           | 13.68 (7.37 to 24.03)              |
| Chile                              | 28.84 (17.56 to 43.84)           | 12.97 (7.34 to 22)                 |
| Uruguay                            | 25.77 (15.38 to 38.75)           | 10.48 (5.74 to 17.64)              |
| <b>Western Europe</b>              |                                  |                                    |
| Andorra                            | 32.08 (19.81 to 47.27)           | 18.13 (10.17 to 29.41)             |
| Austria                            | 36.25 (22.67 to 52.44)           | 19.21 (11.26 to 30.56)             |
| Belgium                            | 31.56 (19.24 to 47.18)           | 17.37 (9.79 to 27.77)              |
| Cyprus                             | 31.97 (19.74 to 47.87)           | 8.56 (4.15 to 15.9)                |
| Denmark                            | 30.37 (17.49 to 46.55)           | 19.22 (10.78 to 30.32)             |
| Finland                            | 35.04 (21.39 to 50.18)           | 16.7 (9.3 to 27.35)                |
| France                             | 35.65 (21.53 to 51.93)           | 17.54 (9.96 to 28.31)              |
| Germany                            | 32.51 (19.86 to 48.62)           | 19.65 (11.38 to 31.32)             |
| Greece                             | 35.17 (21.02 to 51.47)           | 14.41 (7.84 to 24.14)              |
| Iceland                            | 22.45 (12.98 to 35.62)           | 13.64 (7.24 to 24.17)              |
| Ireland                            | 35.4 (22.57 to 49.13)            | 21.27 (12.46 to 32.41)             |
| Israel                             | 9.97 (5.51 to 16.42)             | 5.13 (2.72 to 8.99)                |
| Italy                              | 29.98 (18.02 to 44.18)           | 13.61 (7.53 to 22.55)              |
| Luxembourg                         | 48.07 (33.07 to 62.03)           | 21.29 (12.2 to 33.06)              |
| Malta                              | 21.9 (12.43 to 35.51)            | 10.9 (5.23 to 20.37)               |
| Netherlands                        | 25.31 (14.93 to 38.73)           | 15.14 (8.43 to 24.41)              |
| Norway                             | 23.02 (13.82 to 34.77)           | 15.06 (8.35 to 25.11)              |
| Portugal                           | 46.4 (32.92 to 59.39)            | 14.26 (8.21 to 22.3)               |
| Spain                              | 41.71 (28.07 to 57.16)           | 17.98 (10.48 to 28.06)             |
| Sweden                             | 24.61 (14.43 to 38.24)           | 18.87 (10.91 to 30.7)              |
| Switzerland                        | 24.9 (14.39 to 38.28)            | 19.78 (11.22 to 30.68)             |
| United Kingdom                     | 27.75 (18.16 to 39.06)           | 16.29 (9.67 to 25.66)              |
| <b>Latin America and Caribbean</b> |                                  |                                    |
| <b>Andean Latin America</b>        |                                  |                                    |
| Bolivia                            | 13 (7.04 to 21.3)                | 5.79 (2.67 to 10.98)               |
| Ecuador                            | 23.29 (18.15 to 28.44)           | 7.08 (4.09 to 10.1)                |
| Peru                               | 22.92 (13.65 to 35.03)           | 11.13 (5.92 to 19.36)              |

|                                     | Estimate in 2017, male (95% UIs) | Estimate in 2017, female (95% UIs) |
|-------------------------------------|----------------------------------|------------------------------------|
| <b>Caribbean</b>                    |                                  |                                    |
| Antigua and Barbuda                 | 14.05 (6.87 to 23.44)            | 5.05 (2.19 to 9.52)                |
| The Bahamas                         | 20.67 (10.1 to 33.21)            | 6.53 (3.13 to 11.31)               |
| Barbados                            | 24.57 (14.72 to 36.21)           | 6.92 (3.85 to 11.33)               |
| Belize                              | 30.99 (19.76 to 40.89)           | 7.13 (4.04 to 11.06)               |
| Bermuda                             | 39.19 (29.48 to 49.46)           | 12.13 (7.4 to 17.56)               |
| Cuba                                | 21.52 (12.82 to 33.28)           | 6.67 (3.66 to 11.25)               |
| Dominica                            | 25.14 (14.61 to 36.73)           | 8.07 (4.46 to 12.87)               |
| Dominican Republic                  | 18.54 (10.21 to 30.01)           | 8.61 (4.68 to 14.26)               |
| Grenada                             | 24.99 (14.84 to 36.55)           | 7.46 (4.17 to 12.13)               |
| Guyana                              | 24.24 (14.52 to 35.15)           | 3.04 (1.38 to 5.75)                |
| Haiti                               | 19.13 (11.46 to 28.5)            | 5.9 (3.29 to 9.73)                 |
| Jamaica                             | 21.31 (11.94 to 32.6)            | 5.81 (3.22 to 9.73)                |
| Puerto Rico                         | 29.93 (17.25 to 44.53)           | 8.01 (4.23 to 13.31)               |
| Saint Lucia                         | 26.03 (15.77 to 38.71)           | 7.9 (4.36 to 12.82)                |
| Saint Vincent and the Grenadines    | 20.67 (11.61 to 31.71)           | 6.77 (3.58 to 11.53)               |
| Suriname                            | 28.3 (17.95 to 39.56)            | 8.62 (4.84 to 13.64)               |
| Trinidad and Tobago                 | 15.1 (8.35 to 23.92)             | 4.91 (2.45 to 8.87)                |
| Virgin Islands, U.S.                | 13.15 (0.58 to 28.1)             | 4.64 (0 to 11.02)                  |
| <b>Central Latin America</b>        |                                  |                                    |
| Colombia                            | 26.39 (15.69 to 39.26)           | 6.23 (3.19 to 11.18)               |
| Costa Rica                          | 21.82 (12.72 to 33.82)           | 7.62 (3.87 to 13.75)               |
| El Salvador                         | 20.89 (12.35 to 31.1)            | 4.54 (2.4 to 8.18)                 |
| Guatemala                           | 16.01 (11.24 to 20.51)           | 5.17 (3.13 to 7.43)                |
| Honduras                            | 15.72 (11.62 to 19.92)           | 2.16 (1.29 to 3.37)                |
| Mexico                              | 24.8 (17.2 to 33.44)             | 2.78 (1.37 to 4.92)                |
| Nicaragua                           | 19.23 (11.5 to 28.56)            | 2.42 (1.19 to 4.39)                |
| Panama                              | 26.13 (18.18 to 34.6)            | 4.48 (2.62 to 7.3)                 |
| Venezuela                           | 28.08 (19.12 to 36.85)           | 4.99 (2.85 to 8.05)                |
| <b>Tropical Latin America</b>       |                                  |                                    |
| Brazil                              | 24.88 (15.76 to 34.82)           | 9.64 (5.76 to 14.61)               |
| Paraguay                            | 27.77 (17.09 to 41.33)           | 7.61 (3.95 to 13.61)               |
| <b>North Africa and Middle East</b> |                                  |                                    |
| <b>North Africa and Middle East</b> |                                  |                                    |
| Afghanistan                         | 2.04 (1.18 to 3.29)              | 0.86 (0.44 to 1.58)                |
| Algeria                             | 2.93 (1.68 to 4.44)              | 1.22 (0.66 to 2)                   |
| Bahrain                             | 4.5 (2.62 to 6.69)               | 1.59 (0.86 to 2.57)                |
| Egypt                               | 1.89 (1.38 to 2.4)               | 0.95 (0.51 to 1.44)                |
| Iran                                | 0.02 (0 to 0.08)                 | 0 (0 to 0.02)                      |
| Iraq                                | 2.95 (1.62 to 4.54)              | 1.21 (0.63 to 2.01)                |
| Jordan                              | 1.82 (0.97 to 3.06)              | 0.79 (0.38 to 1.44)                |
| Kuwait                              | 0.62 (0.27 to 1.15)              | 0.25 (0.1 to 0.46)                 |
| Lebanon                             | 9.38 (5.94 to 13.1)              | 2.33 (1.25 to 3.98)                |
| Libya                               | 0.51 (0.21 to 1.01)              | 0.18 (0.07 to 0.35)                |
| Morocco                             | 2.9 (2.25 to 3.58)               | 1.15 (0.71 to 1.61)                |
| Palestine                           | 0.39 (0.09 to 0.88)              | 0.15 (0.03 to 0.35)                |
| Oman                                | 2.54 (1.39 to 4.28)              | 0.93 (0.46 to 1.63)                |

|                                               | Estimate in 2017, male (95% UIs) | Estimate in 2017, female (95% UIs) |
|-----------------------------------------------|----------------------------------|------------------------------------|
| Qatar                                         | 7.66 (4.73 to 10.99)             | 2.15 (1.22 to 3.26)                |
| Saudi Arabia                                  | 1.79 (0.9 to 3.1)                | 0.74 (0.33 to 1.41)                |
| Sudan                                         | 5.95 (4.72 to 7.33)              | 2.96 (1.87 to 3.94)                |
| Syria                                         | 2.29 (1.32 to 3.34)              | 0.55 (0.28 to 0.94)                |
| Tunisia                                       | 3.46 (2.01 to 5.38)              | 0.87 (0.45 to 1.49)                |
| Turkey                                        | 6.39 (3.96 to 8.97)              | 3.46 (1.99 to 5.43)                |
| United Arab Emirates                          | 15.5 (10.23 to 21.88)            | 8.49 (6.73 to 10.55)               |
| Yemen                                         | 0.71 (0.32 to 1.36)              | 0.28 (0.12 to 0.56)                |
| <b>South Asia</b>                             |                                  |                                    |
| South Asia                                    |                                  |                                    |
| Bangladesh                                    | 0.62 (0.34 to 1.02)              | 0.08 (0.04 to 0.15)                |
| Bhutan                                        | 5.6 (3.24 to 8)                  | 0.78 (0.43 to 1.15)                |
| India                                         | 15.76 (12.21 to 19.47)           | 0.93 (0.59 to 1.32)                |
| Nepal                                         | 6.11 (3.51 to 9.22)              | 1.85 (1.28 to 2.36)                |
| Pakistan                                      | 0.07 (0.01 to 0.16)              | 0.01 (0 to 0.03)                   |
| <b>Southeast Asia, East Asia, and Oceania</b> |                                  |                                    |
| East Asia                                     |                                  |                                    |
| China                                         | 22.65 (15.09 to 29.63)           | 1.89 (0.95 to 3.29)                |
| North Korea                                   | 12.97 (7.62 to 20.2)             | 1.58 (0.73 to 2.91)                |
| Taiwan                                        | 23.21 (13.29 to 34.55)           | 2.78 (1.27 to 5)                   |
| Oceania                                       |                                  |                                    |
| American Samoa                                | 8.18 (4.25 to 14.22)             | 2 (0.93 to 3.68)                   |
| Federated States of Micronesia                | 6.78 (3.29 to 12.16)             | 1.53 (0.66 to 3.11)                |
| Fiji                                          | 13.12 (7.25 to 19.9)             | 1.91 (1.04 to 3.09)                |
| Guam                                          | 4.85 (0.71 to 11.62)             | 1.36 (0.06 to 3.46)                |
| Kiribati                                      | 8.71 (4.44 to 14.88)             | 1.18 (0.52 to 2.22)                |
| Marshall Islands                              | 7.21 (3.35 to 13.33)             | 1.79 (0.77 to 3.53)                |
| Northern Mariana Islands                      | 6.7 (1.2 to 14.4)                | 1.61 (0.27 to 3.76)                |
| Papua New Guinea                              | 20.49 (11.2 to 30)               | 4.94 (2.46 to 8.13)                |
| Samoa                                         | 11.73 (6.53 to 19.05)            | 2.79 (1.49 to 4.87)                |
| Solomon Islands                               | 6.59 (3.2 to 11.72)              | 1.58 (0.67 to 3.05)                |
| Tonga                                         | 6.57 (2.94 to 12.11)             | 1.56 (0.64 to 3.2)                 |
| Vanuatu                                       | 4.22 (1.65 to 8.43)              | 1.01 (0.38 to 2.18)                |
| <b>Southeast Asia</b>                         |                                  |                                    |
| Cambodia                                      | 28.31 (22.46 to 33.93)           | 6.85 (4.55 to 9.13)                |
| Indonesia                                     | 1.37 (0.71 to 2.42)              | 0.96 (0.53 to 1.56)                |
| Laos                                          | 14.28 (8.45 to 23.48)            | 5.48 (3.11 to 9.07)                |
| Malaysia                                      | 8.93 (5.43 to 12.17)             | 1.94 (1.06 to 2.88)                |
| Maldives                                      | 6.36 (3.12 to 11.22)             | 1.12 (0.48 to 2.18)                |
| Mauritius                                     | 19.75 (11.35 to 31.68)           | 3.12 (1.43 to 6)                   |
| Myanmar                                       | 8.33 (4.06 to 13.84)             | 0.64 (0.29 to 1.18)                |
| Philippines                                   | 15.23 (8.99 to 24.74)            | 5.01 (2.59 to 8.64)                |
| Sri Lanka                                     | 19.9 (11.48 to 30.68)            | 1.73 (0.95 to 2.81)                |
| Seychelles                                    | 18.83 (11.12 to 27.39)           | 3.04 (1.67 to 4.86)                |
| Thailand                                      | 24.94 (16.37 to 33.51)           | 4.74 (2.68 to 7.25)                |
| Timor-Leste                                   | 0.69 (0.26 to 1.49)              | 0.11 (0.01 to 0.26)                |
| Vietnam                                       | 38.02 (27.73 to 47.97)           | 5.21 (2.93 to 7.74)                |

|                                  | Estimate in 2017, male (95% UIs) | Estimate in 2017, female (95% UIs) |
|----------------------------------|----------------------------------|------------------------------------|
| Sub-Saharan Africa               |                                  |                                    |
| Central Sub-Saharan Africa       |                                  |                                    |
| Angola                           | 13.95 (8.28 to 21.01)            | 7.58 (4.43 to 12.12)               |
| Central African Republic         | 13.97 (7.56 to 21.6)             | 7.58 (4.09 to 12.31)               |
| Congo                            | 14.55 (8.43 to 21.98)            | 8.17 (4.67 to 12.91)               |
| Democratic Republic of the Congo | 9.82 (5.27 to 16.15)             | 5.46 (2.76 to 9.35)                |
| Equatorial Guinea                | 24.09 (16.9 to 30.69)            | 13.97 (8.69 to 19.67)              |
| Gabon                            | 17.51 (11.08 to 24.45)           | 9.64 (5.8 to 14.53)                |
| Eastern Sub-Saharan Africa       |                                  |                                    |
| Burundi                          | 27.27 (21.22 to 33.12)           | 13.35 (8.59 to 17.88)              |
| Comoros                          | 1.5 (0.68 to 2.85)               | 0.84 (0.36 to 1.67)                |
| Djibouti                         | 4.4 (1.98 to 8.61)               | 1.85 (0.79 to 3.8)                 |
| Eritrea                          | 7.86 (3.94 to 13.33)             | 3.37 (1.5 to 6.24)                 |
| Ethiopia                         | 8.93 (5.4 to 14.01)              | 5.35 (2.88 to 9.51)                |
| Kenya                            | 18.18 (12.24 to 23.88)           | 8 (5.29 to 10.85)                  |
| Madagascar                       | 7.97 (4.13 to 13.7)              | 3.49 (1.61 to 6.53)                |
| Malawi                           | 11.49 (6.2 to 18.27)             | 1.73 (0.81 to 3.08)                |
| Mozambique                       | 10.49 (5.33 to 18.15)            | 5.71 (2.58 to 10.8)                |
| Rwanda                           | 20.9 (12.03 to 32.57)            | 11.19 (6.01 to 18.37)              |
| Somalia                          | 2.92 (1.28 to 5.9)               | 1.15 (0.48 to 2.36)                |
| South Sudan                      | 2.66 (1.1 to 5.15)               | 1.08 (0.43 to 2.17)                |
| Tanzania                         | 15.47 (9.22 to 23.75)            | 6.39 (3.56 to 10.67)               |
| Uganda                           | 14.85 (8.27 to 23.77)            | 8.85 (4.66 to 14.97)               |
| Zambia                           | 13.29 (7.41 to 20.88)            | 3.96 (2.17 to 6.45)                |
| Southern Sub-Saharan Africa      |                                  |                                    |
| Botswana                         | 23.12 (16.23 to 29.37)           | 9.66 (5.65 to 13.6)                |
| Lesotho                          | 27.94 (18.86 to 35.94)           | 12.76 (7.23 to 18.54)              |
| Namibia                          | 28.16 (18.01 to 36.84)           | 14.57 (8.61 to 20.69)              |
| South Africa                     | 24.71 (19.88 to 30.08)           | 14.92 (11.29 to 19.1)              |
| Swaziland                        | 13.22 (8.26 to 18.25)            | 3.6 (2.04 to 5.72)                 |
| Zimbabwe                         | 16.42 (9.96 to 23.25)            | 2.72 (1.54 to 4.45)                |
| Western Sub-Saharan Africa       |                                  |                                    |
| Benin                            | 5.83 (3.18 to 9.59)              | 6.83 (3.19 to 12.93)               |
| Burkina Faso                     | 14.84 (8.29 to 21.63)            | 10.06 (5.34 to 16.35)              |
| Cameroon                         | 17.16 (12.77 to 21.45)           | 9.96 (6.12 to 13.98)               |
| Cape Verde                       | 15.75 (10.48 to 20.62)           | 7.81 (4.62 to 11.88)               |
| Chad                             | 9.74 (6.15 to 13.61)             | 4.05 (2.37 to 6.67)                |
| Cote d'Ivoire                    | 11.82 (6.61 to 18.94)            | 3.69 (1.89 to 6.5)                 |
| The Gambia                       | 5.08 (2.78 to 8.41)              | 2.83 (1.33 to 5.22)                |
| Ghana                            | 24.83 (16.89 to 31.8)            | 9.87 (5.73 to 14.65)               |
| Guinea                           | 2.04 (0.9 to 3.95)               | 1.03 (0.42 to 2.03)                |
| Guinea-Bissau                    | 10.3 (6.38 to 14.71)             | 5.33 (3 to 8.53)                   |
| Liberia                          | 12.8 (7.05 to 18.82)             | 8.29 (4.58 to 12.07)               |
| Mali                             | 2.89 (1.6 to 4.23)               | 2.41 (1.33 to 3.63)                |
| Mauritania                       | 1.35 (0.66 to 2.45)              | 0.27 (0.11 to 0.56)                |
| Niger                            | 2.68 (1.1 to 5.18)               | 1.41 (0.51 to 3.05)                |
| Nigeria                          | 16.8 (9.65 to 25.81)             | 4.66 (2.09 to 9.24)                |

|                                                                                                   | Estimate in 2017, male (95% UIs) | Estimate in 2017, female (95% UIs) |
|---------------------------------------------------------------------------------------------------|----------------------------------|------------------------------------|
| Sao Tome and Principe                                                                             | 16.05 (12.8 to 19.7)             | 10.46 (7.15 to 13.93)              |
| Senegal                                                                                           | 1.3 (0.66 to 2.32)               | 1.1 (0.56 to 1.99)                 |
| Sierra Leone                                                                                      | 14.61 (11 to 18.4)               | 8.92 (5.31 to 12.54)               |
| Togo                                                                                              | 8.56 (4.78 to 13.16)             | 4.49 (2.48 to 7.58)                |
| <b>Indicator 3.6.1: Age-standardised death rate due to road injuries (per 100,000 population)</b> |                                  |                                    |
| Central Europe, Eastern Europe, and Central Asia                                                  |                                  |                                    |
| Central Asia                                                                                      |                                  |                                    |
| Armenia                                                                                           | 11.51 (10.77 to 12.38)           | 2.69 (2.49 to 2.93)                |
| Azerbaijan                                                                                        | 9.95 (8.21 to 11.38)             | 2.72 (2.3 to 3.21)                 |
| Georgia                                                                                           | 28.94 (26.09 to 31.24)           | 5.89 (5.47 to 6.39)                |
| Kazakhstan                                                                                        | 22.51 (20.49 to 24.67)           | 7.48 (6.82 to 8.15)                |
| Kyrgyzstan                                                                                        | 22.21 (20.53 to 24.44)           | 7.11 (6.58 to 7.67)                |
| Mongolia                                                                                          | 25.03 (21.5 to 29.2)             | 7.77 (6.58 to 9.2)                 |
| Tajikistan                                                                                        | 11.86 (10.44 to 13.52)           | 3.1 (2.63 to 3.63)                 |
| Turkmenistan                                                                                      | 10.05 (8.8 to 11.54)             | 2.42 (2.14 to 2.72)                |
| Uzbekistan                                                                                        | 21.08 (17.76 to 24.53)           | 4.82 (4.15 to 5.6)                 |
| Central Europe                                                                                    |                                  |                                    |
| Albania                                                                                           | 12.9 (10.04 to 16.16)            | 2.67 (2.06 to 3.41)                |
| Bosnia and Herzegovina                                                                            | 10.28 (9.18 to 11.39)            | 2.38 (2.11 to 2.66)                |
| Bulgaria                                                                                          | 13.02 (11.79 to 14.49)           | 4.06 (3.62 to 4.53)                |
| Croatia                                                                                           | 11.73 (10.72 to 12.79)           | 2.74 (2.48 to 3.03)                |
| Czech Republic                                                                                    | 9.68 (8.83 to 10.57)             | 3.35 (3.04 to 3.66)                |
| Hungary                                                                                           | 9.85 (9.01 to 10.99)             | 2.94 (2.67 to 3.25)                |
| Macedonia                                                                                         | 9.86 (8.8 to 10.97)              | 2.89 (2.46 to 3.33)                |
| Montenegro                                                                                        | 10.98 (9.69 to 12.56)            | 4.27 (3.75 to 4.82)                |
| Poland                                                                                            | 13.48 (12.36 to 14.61)           | 3.69 (3.4 to 3.99)                 |
| Romania                                                                                           | 14.26 (13.09 to 15.44)           | 4.3 (3.95 to 4.65)                 |
| Serbia                                                                                            | 10.55 (9.59 to 11.53)            | 3.35 (3.02 to 3.72)                |
| Slovakia                                                                                          | 10.06 (8.97 to 11.41)            | 3.79 (3.37 to 4.23)                |
| Slovenia                                                                                          | 9.22 (8.27 to 10.23)             | 2.38 (2.11 to 2.67)                |
| Eastern Europe                                                                                    |                                  |                                    |
| Belarus                                                                                           | 13.19 (11.87 to 14.87)           | 4.57 (4.12 to 5.03)                |
| Estonia                                                                                           | 8.48 (7.15 to 10.17)             | 3.12 (2.58 to 3.72)                |
| Latvia                                                                                            | 14.45 (12.43 to 16.68)           | 4.07 (3.41 to 4.82)                |
| Lithuania                                                                                         | 14.65 (13.3 to 16.25)            | 4 (3.58 to 4.42)                   |
| Moldova                                                                                           | 16.74 (15.69 to 18.01)           | 4.1 (3.82 to 4.44)                 |
| Russian Federation                                                                                | 22.85 (22.13 to 24.65)           | 7.35 (7.12 to 7.61)                |
| Ukraine                                                                                           | 22.19 (18.51 to 24.46)           | 5.9 (5.26 to 6.47)                 |
| High-income                                                                                       |                                  |                                    |
| Australasia                                                                                       |                                  |                                    |
| Australia                                                                                         | 8.66 (7.44 to 10.03)             | 3.29 (2.82 to 3.76)                |
| New Zealand                                                                                       | 10.73 (9.92 to 11.57)            | 4.41 (4.08 to 4.76)                |
| High-income Asia Pacific                                                                          |                                  |                                    |
| Brunei                                                                                            | 22.75 (20.15 to 25.58)           | 9.17 (8.04 to 10.41)               |
| Japan                                                                                             | 5.6 (5.34 to 5.93)               | 1.93 (1.84 to 2.03)                |
| South Korea                                                                                       | 13.75 (12.51 to 15.1)            | 4.98 (4.52 to 5.41)                |

|                                    | Estimate in 2017, male (95% UIs) | Estimate in 2017, female (95% UIs) |
|------------------------------------|----------------------------------|------------------------------------|
| Singapore                          | 4.92 (4.47 to 5.42)              | 1.3 (1.16 to 1.45)                 |
| <b>High-income North America</b>   |                                  |                                    |
| Canada                             | 9.05 (8.23 to 9.89)              | 4.17 (3.78 to 4.58)                |
| Greenland                          | 4.87 (4.21 to 5.67)              | 3.13 (2.71 to 3.66)                |
| United States                      | 16.89 (15.7 to 17.76)            | 7.08 (6.75 to 7.4)                 |
| <b>Southern Latin America</b>      |                                  |                                    |
| Argentina                          | 21.03 (18.23 to 24.4)            | 6.24 (5.38 to 7.24)                |
| Chile                              | 17.48 (14.83 to 20.28)           | 4.96 (4.27 to 5.78)                |
| Uruguay                            | 23.16 (19.79 to 26.72)           | 6.95 (5.98 to 8.05)                |
| <b>Western Europe</b>              |                                  |                                    |
| Andorra                            | 5.96 (4.89 to 7.19)              | 2.06 (1.71 to 2.56)                |
| Austria                            | 6.52 (5.97 to 7.11)              | 2.22 (2.02 to 2.44)                |
| Belgium                            | 10.42 (9.57 to 11.35)            | 3.53 (3.23 to 3.88)                |
| Cyprus                             | 15.68 (13.81 to 17.79)           | 4.73 (4.21 to 5.45)                |
| Denmark                            | 5.52 (5.04 to 6.05)              | 2.36 (2.09 to 2.65)                |
| Finland                            | 5.99 (5.45 to 6.61)              | 2.26 (2.03 to 2.49)                |
| France                             | 8.32 (7.64 to 9.12)              | 2.49 (2.26 to 2.71)                |
| Germany                            | 6.61 (5.72 to 7.64)              | 2.23 (1.9 to 2.59)                 |
| Greece                             | 15.01 (13.84 to 16.3)            | 4.43 (4.01 to 4.86)                |
| Iceland                            | 5.14 (4.68 to 5.67)              | 2.08 (1.91 to 2.26)                |
| Ireland                            | 4.94 (4.44 to 5.52)              | 1.92 (1.73 to 2.14)                |
| Israel                             | 9.03 (8.28 to 9.9)               | 3.49 (3.19 to 3.83)                |
| Italy                              | 9.29 (8.54 to 10.15)             | 2.94 (2.69 to 3.2)                 |
| Luxembourg                         | 7.54 (6.55 to 8.6)               | 3.08 (2.7 to 3.53)                 |
| Malta                              | 5.19 (4.76 to 5.69)              | 1.48 (1.33 to 1.64)                |
| Netherlands                        | 5.36 (4.96 to 5.82)              | 2.11 (1.93 to 2.3)                 |
| Norway                             | 4.95 (4.73 to 5.19)              | 1.77 (1.69 to 1.85)                |
| Portugal                           | 10.35 (9.37 to 11.4)             | 2.79 (2.5 to 3.07)                 |
| Spain                              | 6.34 (5.83 to 6.91)              | 1.93 (1.76 to 2.11)                |
| Sweden                             | 4.56 (4.16 to 4.98)              | 1.54 (1.4 to 1.68)                 |
| Switzerland                        | 4.47 (4.06 to 5.02)              | 1.57 (1.41 to 1.73)                |
| United Kingdom                     | 5.15 (5 to 5.34)                 | 1.67 (1.61 to 1.72)                |
| <b>Latin America and Caribbean</b> |                                  |                                    |
| <b>Andean Latin America</b>        |                                  |                                    |
| Bolivia                            | 30.07 (21.23 to 39.15)           | 11.27 (8.37 to 14.35)              |
| Ecuador                            | 42.1 (36.97 to 48.05)            | 11.85 (10.44 to 13.35)             |
| Peru                               | 20.53 (16.55 to 24.88)           | 7.1 (5.76 to 8.64)                 |
| <b>Caribbean</b>                   |                                  |                                    |
| Antigua and Barbuda                | 10.69 (9.37 to 12.16)            | 3.33 (2.93 to 3.72)                |
| The Bahamas                        | 22.96 (20.06 to 26.23)           | 7.31 (6.28 to 8.45)                |
| Barbados                           | 13.18 (11.54 to 14.89)           | 4.7 (4.1 to 5.31)                  |
| Belize                             | 31.37 (27.92 to 34.24)           | 6.46 (5.91 to 7.04)                |
| Bermuda                            | 14.83 (13.04 to 16.77)           | 1.6 (1.39 to 1.85)                 |
| Cuba                               | 12.08 (10.34 to 14.16)           | 3.84 (3.29 to 4.42)                |
| Dominica                           | 22.71 (19.9 to 25.37)            | 7.76 (6.78 to 8.76)                |
| Dominican Republic                 | 48.83 (39.93 to 58.23)           | 10.18 (8.44 to 12.09)              |
| Grenada                            | 13.89 (12.48 to 15.42)           | 4.59 (4.09 to 5.1)                 |



|                                     | Estimate in 2017, male (95% UIs) | Estimate in 2017, female (95% UIs) |
|-------------------------------------|----------------------------------|------------------------------------|
| Guyana                              | 25.8 (21.36 to 30.46)            | 5.98 (4.95 to 7.07)                |
| Haiti                               | 63.74 (33.59 to 95.31)           | 22.74 (13.03 to 31.39)             |
| Jamaica                             | 14.54 (10.74 to 18.14)           | 3.9 (3.21 to 4.77)                 |
| Puerto Rico                         | 16.21 (14.51 to 17.99)           | 4.1 (3.65 to 4.54)                 |
| Saint Lucia                         | 19.51 (16.87 to 22.25)           | 5.79 (5.05 to 6.58)                |
| Saint Vincent and the Grenadines    | 13.97 (12.35 to 15.65)           | 4.43 (3.93 to 4.96)                |
| Suriname                            | 25.89 (21.65 to 30.18)           | 7.61 (6.59 to 8.79)                |
| Trinidad and Tobago                 | 20.99 (16.37 to 26.08)           | 6.19 (4.64 to 7.92)                |
| Virgin Islands, U.S.                | 17.33 (14.79 to 20.37)           | 5.4 (4.53 to 6.43)                 |
| <b>Central Latin America</b>        |                                  |                                    |
| Colombia                            | 22.93 (19.76 to 26.45)           | 5.48 (4.73 to 6.34)                |
| Costa Rica                          | 25.82 (22.36 to 28.98)           | 5.86 (5.25 to 6.58)                |
| El Salvador                         | 37.14 (29.35 to 45.89)           | 8.28 (6.59 to 10.36)               |
| Guatemala                           | 29.7 (24.91 to 34.77)            | 5.95 (5.1 to 6.83)                 |
| Honduras                            | 22.14 (14.6 to 29.16)            | 10.77 (7.94 to 13.73)              |
| Mexico                              | 25.09 (23.88 to 26.15)           | 6.97 (6.74 to 7.21)                |
| Nicaragua                           | 18.37 (15.42 to 21.86)           | 3.74 (3.14 to 4.46)                |
| Panama                              | 20.13 (18.02 to 22.23)           | 5.22 (4.64 to 5.76)                |
| Venezuela                           | 35.47 (28.59 to 43.24)           | 8.18 (6.7 to 9.99)                 |
| <b>Tropical Latin America</b>       |                                  |                                    |
| Brazil                              | 32.91 (30.94 to 34.27)           | 7.92 (7.64 to 8.17)                |
| Paraguay                            | 36 (28.28 to 45.16)              | 7.72 (5.87 to 9.62)                |
| <b>North Africa and Middle East</b> |                                  |                                    |
| <b>North Africa and Middle East</b> |                                  |                                    |
| Afghanistan                         | 51.71 (39.68 to 66.25)           | 13.47 (10.17 to 17.69)             |
| Algeria                             | 23.7 (17.68 to 41.82)            | 10.34 (7.43 to 16.88)              |
| Bahrain                             | 13.34 (11.72 to 15.2)            | 4.45 (3.92 to 5.19)                |
| Egypt                               | 45.49 (26.91 to 63.29)           | 16.26 (9.88 to 23.01)              |
| Iran                                | 37.84 (36.97 to 39.04)           | 13.13 (12.62 to 14.7)              |
| Iraq                                | 12.95 (11.61 to 14.56)           | 5.46 (4.87 to 6.25)                |
| Jordan                              | 16.1 (14.03 to 18.38)            | 6.17 (5.3 to 7.15)                 |
| Kuwait                              | 21.26 (18.89 to 23.24)           | 3.84 (3.52 to 4.2)                 |
| Lebanon                             | 11.23 (6.95 to 14.15)            | 2.38 (1.73 to 2.87)                |
| Libya                               | 35.83 (13.31 to 63.06)           | 13.14 (4.65 to 23.47)              |
| Morocco                             | 32.85 (22.86 to 58.46)           | 7.57 (5.82 to 9.75)                |
| Palestine                           | 12.12 (10.64 to 13.74)           | 4.53 (4.01 to 5.15)                |
| Oman                                | 61.41 (47.75 to 75.19)           | 21.96 (17.99 to 26.42)             |
| Qatar                               | 30.89 (24.78 to 38.22)           | 7.11 (5.79 to 8.77)                |
| Saudi Arabia                        | 50.02 (33.53 to 61.34)           | 15.95 (11.51 to 19.85)             |
| Sudan                               | 41.59 (29.18 to 74.36)           | 17.53 (11.46 to 31.37)             |
| Syria                               | 16.86 (12.78 to 20.85)           | 5.77 (4.64 to 6.91)                |
| Tunisia                             | 43.17 (33.04 to 54.93)           | 16.57 (12.02 to 21.65)             |
| Turkey                              | 16.41 (14.52 to 18.42)           | 4.04 (3.53 to 4.61)                |
| United Arab Emirates                | 60.96 (46.29 to 77.74)           | 25.45 (19.33 to 33.09)             |
| Yemen                               | 54.48 (39.87 to 86.42)           | 21.04 (14.24 to 32.8)              |
| <b>South Asia</b>                   |                                  |                                    |
| <b>South Asia</b>                   |                                  |                                    |



|                                               | Estimate in 2017, male (95% UIs) | Estimate in 2017, female (95% UIs) |
|-----------------------------------------------|----------------------------------|------------------------------------|
| Bangladesh                                    | 13.58 (10.08 to 16.33)           | 2.47 (1.99 to 2.99)                |
| Bhutan                                        | 10.78 (7.7 to 13.76)             | 4.34 (3.24 to 5.59)                |
| India                                         | 25.23 (23.02 to 26.86)           | 8.32 (7.09 to 8.89)                |
| Nepal                                         | 40.49 (18.09 to 65.86)           | 13.56 (6.11 to 19.29)              |
| Pakistan                                      | 39.01 (19.24 to 54.64)           | 18.9 (9.04 to 26.3)                |
| <b>Southeast Asia, East Asia, and Oceania</b> |                                  |                                    |
| <b>East Asia</b>                              |                                  |                                    |
| China                                         | 22.29 (21 to 23.47)              | 8.14 (7.74 to 8.64)                |
| North Korea                                   | 30.07 (17.89 to 51.49)           | 9.69 (6.58 to 16.11)               |
| Taiwan                                        | 19.19 (17.74 to 20.79)           | 6.77 (6.18 to 7.36)                |
| <b>Oceania</b>                                |                                  |                                    |
| American Samoa                                | 9.88 (8.84 to 11.04)             | 7.39 (6.4 to 8.38)                 |
| Federated States of Micronesia                | 23.56 (14.92 to 31.82)           | 10.95 (7.41 to 15.11)              |
| Fiji                                          | 13.51 (11.36 to 15.93)           | 6.19 (5.17 to 7.29)                |
| Guam                                          | 17.91 (15.63 to 20.23)           | 8.32 (7.16 to 9.49)                |
| Kiribati                                      | 17.8 (13.28 to 22.07)            | 4.78 (3.66 to 6.03)                |
| Marshall Islands                              | 31.86 (22.55 to 40.01)           | 15.77 (9.43 to 21.06)              |
| Northern Mariana Islands                      | 14.38 (12.14 to 16.5)            | 7.13 (6.17 to 8.43)                |
| Papua New Guinea                              | 49.55 (36.94 to 63.28)           | 17.54 (12.95 to 22.81)             |
| Samoa                                         | 13.79 (10.31 to 20.91)           | 7.49 (5.5 to 10.17)                |
| Solomon Islands                               | 28.68 (20.67 to 39.56)           | 13.85 (10.02 to 18.31)             |
| Tonga                                         | 17.97 (14.36 to 21.18)           | 5.87 (4.69 to 7.16)                |
| Vanuatu                                       | 29.83 (20.26 to 42.25)           | 11.23 (7.87 to 15.85)              |
| <b>Southeast Asia</b>                         |                                  |                                    |
| Cambodia                                      | 43.4 (32.12 to 57.9)             | 13.32 (9.86 to 17.87)              |
| Indonesia                                     | 21.89 (19.43 to 23.87)           | 6.78 (6.25 to 7.46)                |
| Laos                                          | 38.84 (27.68 to 50.82)           | 13.99 (10.7 to 17.37)              |
| Malaysia                                      | 36.54 (31.4 to 41.58)            | 8.7 (7.34 to 9.97)                 |
| Maldives                                      | 11.32 (7.87 to 22.29)            | 4.24 (3.12 to 7.78)                |
| Mauritius                                     | 19.28 (17.35 to 21.38)           | 3.41 (3.05 to 3.77)                |
| Myanmar                                       | 30.58 (24.7 to 37.3)             | 11.25 (8.83 to 13.62)              |
| Philippines                                   | 17.16 (14.16 to 20.38)           | 5.48 (4.63 to 6.5)                 |
| Sri Lanka                                     | 20.37 (16.18 to 25.05)           | 5.03 (3.77 to 6.23)                |
| Seychelles                                    | 19.93 (16.83 to 22.59)           | 5.96 (5.12 to 6.77)                |
| Thailand                                      | 39.66 (34.13 to 45.22)           | 9.31 (7.89 to 10.73)               |
| Timor-Leste                                   | 15.32 (8.27 to 29.39)            | 5.33 (3.12 to 9.74)                |
| Vietnam                                       | 34.2 (28.04 to 39.32)            | 9.18 (7.26 to 11.36)               |
| <b>Sub-Saharan Africa</b>                     |                                  |                                    |
| <b>Central Sub-Saharan Africa</b>             |                                  |                                    |
| Angola                                        | 42.34 (33.35 to 54.88)           | 15.53 (11.9 to 19.76)              |
| Central African Republic                      | 125.93 (62.67 to 172.79)         | 43.13 (21.91 to 62.41)             |
| Congo                                         | 36.84 (27.34 to 49.1)            | 19.56 (12.99 to 26.22)             |
| Democratic Republic of the Congo              | 41.34 (30.71 to 53.24)           | 15.96 (11.33 to 20.89)             |
| Equatorial Guinea                             | 28.57 (20.03 to 40.17)           | 12.75 (7.67 to 18.92)              |
| Gabon                                         | 44.25 (33.76 to 56.1)            | 13.01 (9.4 to 17.78)               |
| <b>Eastern Sub-Saharan Africa</b>             |                                  |                                    |
| Burundi                                       | 48.04 (35.37 to 68.99)           | 21.2 (14.26 to 29.84)              |

|                                                                                                              | Estimate in 2017, male (95% UIs) | Estimate in 2017, female (95% UIs) |
|--------------------------------------------------------------------------------------------------------------|----------------------------------|------------------------------------|
| Comoros                                                                                                      | 29.14 (23.12 to 36.2)            | 12.45 (9.57 to 16.32)              |
| Djibouti                                                                                                     | 31.6 (22.14 to 43.32)            | 12.68 (8.33 to 18.4)               |
| Eritrea                                                                                                      | 51.84 (33.37 to 66.32)           | 17.37 (12.79 to 22.06)             |
| Ethiopia                                                                                                     | 21.47 (19.18 to 23.81)           | 8.53 (7.42 to 9.82)                |
| Kenya                                                                                                        | 27.5 (24.16 to 32.41)            | 9.46 (8.18 to 11.34)               |
| Madagascar                                                                                                   | 29.55 (22.77 to 37.82)           | 11.68 (8.86 to 14.99)              |
| Malawi                                                                                                       | 31.54 (26.17 to 37.48)           | 8.98 (7.19 to 10.98)               |
| Mozambique                                                                                                   | 45.17 (36.23 to 53.97)           | 12.36 (9.73 to 15.64)              |
| Rwanda                                                                                                       | 51.9 (29.83 to 80.55)            | 18.46 (10.98 to 26.65)             |
| Somalia                                                                                                      | 76.13 (33.61 to 109.55)          | 25.37 (12.07 to 38.69)             |
| South Sudan                                                                                                  | 40 (28.63 to 56.73)              | 14.37 (10.44 to 19.72)             |
| Tanzania                                                                                                     | 21.91 (18.31 to 26.16)           | 9.08 (7.5 to 10.97)                |
| Uganda                                                                                                       | 40.61 (25.64 to 52.82)           | 13.33 (8.75 to 19.38)              |
| Zambia                                                                                                       | 28.87 (24.09 to 33.88)           | 10.74 (8.74 to 12.89)              |
| <b>Southern Sub-Saharan Africa</b>                                                                           |                                  |                                    |
| Botswana                                                                                                     | 17.39 (14.99 to 20.54)           | 12.75 (9.3 to 15.3)                |
| Lesotho                                                                                                      | 75.49 (57.95 to 95)              | 16.35 (11.61 to 23.53)             |
| Namibia                                                                                                      | 36.51 (28.6 to 47)               | 8.94 (6.75 to 13.15)               |
| South Africa                                                                                                 | 42.03 (39.18 to 45.34)           | 14.88 (13.44 to 17.06)             |
| Swaziland                                                                                                    | 63.98 (45.23 to 82.09)           | 13.6 (9.64 to 19.58)               |
| Zimbabwe                                                                                                     | 41.14 (25.6 to 60.18)            | 11.06 (6.76 to 16.24)              |
| <b>Western Sub-Saharan Africa</b>                                                                            |                                  |                                    |
| Benin                                                                                                        | 60.59 (26.93 to 89.32)           | 23.4 (11.5 to 31.94)               |
| Burkina Faso                                                                                                 | 35.4 (27.46 to 42.71)            | 13.86 (11.13 to 16.74)             |
| Cameroon                                                                                                     | 32.07 (23.56 to 41.37)           | 13.71 (10.16 to 18.33)             |
| Cape Verde                                                                                                   | 12.27 (9.83 to 14.3)             | 4.31 (3.79 to 4.88)                |
| Chad                                                                                                         | 34.57 (26.87 to 47.39)           | 15 (11.68 to 19.24)                |
| Cote d'Ivoire                                                                                                | 31.2 (26.03 to 37.02)            | 11.62 (8.71 to 15.65)              |
| The Gambia                                                                                                   | 29.83 (21.79 to 37.68)           | 12.43 (10.14 to 15.58)             |
| Ghana                                                                                                        | 36.91 (30.96 to 43.7)            | 12.95 (10.66 to 15.41)             |
| Guinea                                                                                                       | 34.23 (27.91 to 42.23)           | 14.26 (10.99 to 17.88)             |
| Guinea-Bissau                                                                                                | 45.2 (35.59 to 56.15)            | 20.72 (16.41 to 26.42)             |
| Liberia                                                                                                      | 21.43 (16.36 to 27.03)           | 9.76 (7.55 to 12.08)               |
| Mali                                                                                                         | 26.01 (20.03 to 38.12)           | 13.38 (10.18 to 17.14)             |
| Mauritania                                                                                                   | 28.35 (20.87 to 35.18)           | 17.79 (14.63 to 21.57)             |
| Niger                                                                                                        | 25.39 (17.93 to 36.51)           | 10.51 (7.35 to 14.55)              |
| Nigeria                                                                                                      | 18.63 (13.06 to 24.58)           | 8.24 (5.81 to 11.14)               |
| Sao Tome and Principe                                                                                        | 22.72 (10.84 to 29.84)           | 8.89 (6.1 to 11.92)                |
| Senegal                                                                                                      | 26.01 (19.87 to 39.33)           | 9.43 (7.04 to 13.38)               |
| Sierra Leone                                                                                                 | 29.08 (23.19 to 36.96)           | 15.69 (11.86 to 20.55)             |
| Togo                                                                                                         | 32.21 (24.89 to 40.69)           | 14.13 (11.02 to 17.31)             |
| <b>Indicator 3.9.3: Age-standardised death rate due to unintentional poisonings (per 100,000 population)</b> |                                  |                                    |
| Central Europe, Eastern Europe, and Central Asia                                                             |                                  |                                    |
| Central Asia                                                                                                 |                                  |                                    |
| Armenia                                                                                                      | 0.81 (0.72 to 0.89)              | 0.37 (0.34 to 0.4)                 |
| Azerbaijan                                                                                                   | 1.2 (0.81 to 2.12)               | 0.51 (0.41 to 0.69)                |

|                                  | Estimate in 2017, male (95% UIs) | Estimate in 2017, female (95% UIs) |
|----------------------------------|----------------------------------|------------------------------------|
| Georgia                          | 1.08 (0.96 to 1.2)               | 0.55 (0.49 to 0.62)                |
| Kazakhstan                       | 3.76 (3.4 to 4.18)               | 1.38 (1.23 to 1.54)                |
| Kyrgyzstan                       | 2 (1.8 to 2.28)                  | 0.82 (0.75 to 0.9)                 |
| Mongolia                         | 3.79 (2.63 to 7.64)              | 1.69 (1.33 to 2.5)                 |
| Tajikistan                       | 1.01 (0.62 to 2.76)              | 0.31 (0.21 to 0.72)                |
| Turkmenistan                     | 0.8 (0.67 to 0.93)               | 0.42 (0.37 to 0.49)                |
| Uzbekistan                       | 1.6 (1.36 to 1.89)               | 0.6 (0.52 to 0.71)                 |
| <b>Central Europe</b>            |                                  |                                    |
| Albania                          | 0.53 (0.39 to 0.75)              | 0.22 (0.14 to 0.3)                 |
| Bosnia and Herzegovina           | 0.58 (0.39 to 1.33)              | 0.33 (0.26 to 0.55)                |
| Bulgaria                         | 0.65 (0.59 to 0.73)              | 0.28 (0.25 to 0.32)                |
| Croatia                          | 0.39 (0.35 to 0.43)              | 0.21 (0.19 to 0.23)                |
| Czech Republic                   | 0.84 (0.76 to 0.93)              | 0.27 (0.24 to 0.3)                 |
| Hungary                          | 0.56 (0.51 to 0.62)              | 0.22 (0.2 to 0.24)                 |
| Macedonia                        | 0.46 (0.33 to 0.59)              | 0.21 (0.14 to 0.25)                |
| Montenegro                       | 0.76 (0.59 to 1)                 | 0.41 (0.34 to 0.52)                |
| Poland                           | 0.68 (0.61 to 0.76)              | 0.27 (0.25 to 0.3)                 |
| Romania                          | 1.72 (1.57 to 1.88)              | 0.89 (0.82 to 0.98)                |
| Serbia                           | 0.47 (0.38 to 0.71)              | 0.22 (0.18 to 0.26)                |
| Slovakia                         | 0.68 (0.54 to 1)                 | 0.3 (0.25 to 0.37)                 |
| Slovenia                         | 0.28 (0.25 to 0.32)              | 0.11 (0.1 to 0.12)                 |
| <b>Eastern Europe</b>            |                                  |                                    |
| Belarus                          | 3.86 (3.35 to 4.44)              | 1.04 (0.92 to 1.16)                |
| Estonia                          | 0.78 (0.64 to 0.95)              | 0.19 (0.15 to 0.23)                |
| Latvia                           | 1.49 (1.26 to 1.75)              | 0.32 (0.26 to 0.38)                |
| Lithuania                        | 4.25 (3.79 to 4.74)              | 0.91 (0.81 to 1.01)                |
| Moldova                          | 6.29 (5.79 to 6.79)              | 1.84 (1.69 to 2.02)                |
| Russian Federation               | 5.65 (5.45 to 5.86)              | 1.68 (1.61 to 1.75)                |
| Ukraine                          | 4.33 (3.94 to 4.76)              | 1.04 (0.93 to 1.14)                |
| <b>High-income</b>               |                                  |                                    |
| <b>Australasia</b>               |                                  |                                    |
| Australia                        | 0.25 (0.22 to 0.29)              | 0.13 (0.11 to 0.14)                |
| New Zealand                      | 0.29 (0.26 to 0.32)              | 0.1 (0.09 to 0.11)                 |
| <b>High-income Asia Pacific</b>  |                                  |                                    |
| Brunei                           | 0.59 (0.47 to 0.92)              | 0.33 (0.27 to 0.43)                |
| Japan                            | 0.35 (0.33 to 0.38)              | 0.11 (0.1 to 0.11)                 |
| South Korea                      | 0.49 (0.44 to 0.55)              | 0.16 (0.14 to 0.18)                |
| Singapore                        | 0.07 (0.06 to 0.08)              | 0.03 (0.03 to 0.04)                |
| <b>High-income North America</b> |                                  |                                    |
| Canada                           | 0.43 (0.38 to 0.48)              | 0.22 (0.2 to 0.25)                 |
| Greenland                        | 1.54 (1.2 to 2.03)               | 0.71 (0.53 to 0.85)                |
| United States                    | 0.64 (0.61 to 0.67)              | 0.34 (0.33 to 0.36)                |
| <b>Southern Latin America</b>    |                                  |                                    |
| Argentina                        | 0.99 (0.86 to 1.15)              | 0.53 (0.46 to 0.61)                |
| Chile                            | 0.4 (0.34 to 0.47)               | 0.18 (0.15 to 0.21)                |
| Uruguay                          | 0.75 (0.64 to 0.88)              | 0.37 (0.31 to 0.43)                |
| <b>Western Europe</b>            |                                  |                                    |

|                                  | Estimate in 2017, male (95% UIs) | Estimate in 2017, female (95% UIs) |
|----------------------------------|----------------------------------|------------------------------------|
| Andorra                          | 0.29 (0.21 to 0.43)              | 0.13 (0.1 to 0.16)                 |
| Austria                          | 0.38 (0.34 to 0.43)              | 0.15 (0.13 to 0.16)                |
| Belgium                          | 0.33 (0.3 to 0.37)               | 0.21 (0.19 to 0.23)                |
| Cyprus                           | 0.29 (0.2 to 0.37)               | 0.08 (0.06 to 0.1)                 |
| Denmark                          | 0.25 (0.22 to 0.28)              | 0.08 (0.07 to 0.09)                |
| Finland                          | 0.34 (0.3 to 0.39)               | 0.12 (0.1 to 0.13)                 |
| France                           | 0.31 (0.28 to 0.35)              | 0.18 (0.16 to 0.2)                 |
| Germany                          | 0.15 (0.13 to 0.17)              | 0.05 (0.05 to 0.06)                |
| Greece                           | 0.23 (0.2 to 0.25)               | 0.09 (0.08 to 0.1)                 |
| Iceland                          | 0.45 (0.41 to 0.49)              | 0.1 (0.09 to 0.11)                 |
| Ireland                          | 0.28 (0.24 to 0.32)              | 0.1 (0.09 to 0.11)                 |
| Israel                           | 0.16 (0.14 to 0.18)              | 0.08 (0.07 to 0.09)                |
| Italy                            | 0.17 (0.15 to 0.19)              | 0.09 (0.08 to 0.09)                |
| Luxembourg                       | 0.18 (0.15 to 0.21)              | 0.12 (0.1 to 0.13)                 |
| Malta                            | 0.19 (0.16 to 0.21)              | 0.04 (0.04 to 0.05)                |
| Netherlands                      | 0.11 (0.1 to 0.12)               | 0.08 (0.07 to 0.09)                |
| Norway                           | 1.14 (1.02 to 1.27)              | 0.49 (0.44 to 0.53)                |
| Portugal                         | 0.28 (0.25 to 0.31)              | 0.14 (0.13 to 0.16)                |
| Spain                            | 0.23 (0.21 to 0.26)              | 0.12 (0.11 to 0.13)                |
| Sweden                           | 0.4 (0.36 to 0.44)               | 0.19 (0.17 to 0.21)                |
| Switzerland                      | 0.13 (0.11 to 0.15)              | 0.07 (0.06 to 0.07)                |
| United Kingdom                   | 0.25 (0.24 to 0.25)              | 0.13 (0.12 to 0.13)                |
| Latin America and Caribbean      |                                  |                                    |
| Andean Latin America             |                                  |                                    |
| Bolivia                          | 1.11 (0.74 to 1.65)              | 0.6 (0.42 to 0.8)                  |
| Ecuador                          | 0.83 (0.72 to 0.95)              | 0.44 (0.38 to 0.5)                 |
| Peru                             | 0.89 (0.65 to 1.28)              | 0.43 (0.33 to 0.59)                |
| Caribbean                        |                                  |                                    |
| Antigua and Barbuda              | 0.27 (0.23 to 0.31)              | 0.68 (0.6 to 0.79)                 |
| The Bahamas                      | 0.32 (0.27 to 0.36)              | 0.28 (0.24 to 0.32)                |
| Barbados                         | 0.2 (0.17 to 0.23)               | 0.18 (0.16 to 0.2)                 |
| Belize                           | 0.68 (0.61 to 0.77)              | 0.57 (0.51 to 0.63)                |
| Bermuda                          | 0.28 (0.24 to 0.32)              | 0.09 (0.08 to 0.11)                |
| Cuba                             | 0.13 (0.11 to 0.15)              | 0.3 (0.26 to 0.34)                 |
| Dominica                         | 1.63 (1.41 to 1.88)              | 1.13 (0.98 to 1.28)                |
| Dominican Republic               | 0.39 (0.26 to 0.8)               | 0.33 (0.26 to 0.52)                |
| Grenada                          | 0.33 (0.29 to 0.38)              | 0.55 (0.48 to 0.62)                |
| Guyana                           | 0.37 (0.31 to 0.44)              | 0.63 (0.53 to 0.74)                |
| Haiti                            | 1.01 (0.36 to 1.69)              | 0.84 (0.42 to 1.2)                 |
| Jamaica                          | 0.28 (0.2 to 0.36)               | 0.28 (0.23 to 0.34)                |
| Puerto Rico                      | 0.22 (0.19 to 0.25)              | 0.17 (0.15 to 0.19)                |
| Saint Lucia                      | 0.26 (0.23 to 0.3)               | 0.23 (0.2 to 0.26)                 |
| Saint Vincent and the Grenadines | 0.23 (0.2 to 0.25)               | 0.24 (0.22 to 0.27)                |
| Suriname                         | 0.35 (0.3 to 0.41)               | 0.52 (0.45 to 0.58)                |
| Trinidad and Tobago              | 0.22 (0.17 to 0.28)              | 0.16 (0.12 to 0.2)                 |
| Virgin Islands, U.S.             | 0.27 (0.23 to 0.32)              | 0.47 (0.4 to 0.54)                 |
| Central Latin America            |                                  |                                    |

|                                               | Estimate in 2017, male (95% UIs) | Estimate in 2017, female (95% UIs) |
|-----------------------------------------------|----------------------------------|------------------------------------|
| Colombia                                      | 0.28 (0.24 to 0.32)              | 0.08 (0.07 to 0.1)                 |
| Costa Rica                                    | 0.43 (0.36 to 0.49)              | 0.14 (0.12 to 0.15)                |
| El Salvador                                   | 0.37 (0.25 to 0.49)              | 0.13 (0.1 to 0.17)                 |
| Guatemala                                     | 2.22 (1.89 to 2.57)              | 0.85 (0.72 to 0.99)                |
| Honduras                                      | 1.71 (0.99 to 2.64)              | 0.55 (0.32 to 0.83)                |
| Mexico                                        | 0.75 (0.69 to 0.79)              | 0.4 (0.38 to 0.41)                 |
| Nicaragua                                     | 0.52 (0.39 to 0.83)              | 0.24 (0.19 to 0.31)                |
| Panama                                        | 0.48 (0.42 to 0.54)              | 0.23 (0.2 to 0.27)                 |
| Venezuela                                     | 0.45 (0.37 to 0.55)              | 0.25 (0.21 to 0.3)                 |
| <b>Tropical Latin America</b>                 |                                  |                                    |
| Brazil                                        | 0.22 (0.21 to 0.23)              | 0.14 (0.13 to 0.14)                |
| Paraguay                                      | 0.3 (0.22 to 0.52)               | 0.18 (0.13 to 0.3)                 |
| <b>North Africa and Middle East</b>           |                                  |                                    |
| <b>North Africa and Middle East</b>           |                                  |                                    |
| Afghanistan                                   | 1.05 (0.43 to 1.72)              | 1.63 (1.04 to 2.2)                 |
| Algeria                                       | 1.11 (0.33 to 1.82)              | 0.65 (0.21 to 0.93)                |
| Bahrain                                       | 0.18 (0.11 to 0.25)              | 0.1 (0.08 to 0.15)                 |
| Egypt                                         | 0.3 (0.17 to 0.47)               | 0.22 (0.1 to 0.35)                 |
| Iran                                          | 1.61 (1.13 to 1.86)              | 0.7 (0.61 to 0.86)                 |
| Iraq                                          | 0.26 (0.2 to 0.32)               | 0.31 (0.23 to 0.37)                |
| Jordan                                        | 0.67 (0.45 to 0.87)              | 0.62 (0.49 to 0.78)                |
| Kuwait                                        | 0.54 (0.47 to 0.61)              | 0.2 (0.18 to 0.23)                 |
| Lebanon                                       | 0.9 (0.25 to 1.53)               | 0.41 (0.12 to 0.61)                |
| Libya                                         | 1.44 (0.42 to 2.16)              | 0.69 (0.16 to 1.14)                |
| Morocco                                       | 1.37 (0.39 to 2.19)              | 0.85 (0.27 to 1.19)                |
| Palestine                                     | 0.18 (0.12 to 0.42)              | 0.15 (0.13 to 0.21)                |
| Oman                                          | 0.91 (0.25 to 1.56)              | 0.07 (0.05 to 0.09)                |
| Qatar                                         | 0.36 (0.2 to 0.52)               | 0.1 (0.06 to 0.13)                 |
| Saudi Arabia                                  | 0.89 (0.49 to 1.38)              | 0.59 (0.35 to 0.84)                |
| Sudan                                         | 1.82 (0.51 to 2.82)              | 1 (0.29 to 1.5)                    |
| Syria                                         | 0.64 (0.45 to 0.85)              | 0.39 (0.28 to 0.49)                |
| Tunisia                                       | 0.88 (0.23 to 1.59)              | 0.42 (0.13 to 0.64)                |
| Turkey                                        | 0.76 (0.4 to 0.96)               | 0.31 (0.21 to 0.38)                |
| United Arab Emirates                          | 0.3 (0.13 to 0.46)               | 0.06 (0.04 to 0.08)                |
| Yemen                                         | 2.01 (0.53 to 3.33)              | 1.1 (0.31 to 1.6)                  |
| <b>South Asia</b>                             |                                  |                                    |
| <b>South Asia</b>                             |                                  |                                    |
| Bangladesh                                    | 0.54 (0.29 to 0.77)              | 0.15 (0.11 to 0.2)                 |
| Bhutan                                        | 0.39 (0.23 to 0.72)              | 0.2 (0.14 to 0.32)                 |
| India                                         | 0.51 (0.33 to 0.66)              | 0.27 (0.21 to 0.33)                |
| Nepal                                         | 0.39 (0.25 to 0.61)              | 0.22 (0.15 to 0.36)                |
| Pakistan                                      | 0.48 (0.32 to 0.69)              | 0.57 (0.43 to 0.75)                |
| <b>Southeast Asia, East Asia, and Oceania</b> |                                  |                                    |
| <b>East Asia</b>                              |                                  |                                    |
| China                                         | 1.9 (1.02 to 2.33)               | 1.4 (0.71 to 1.65)                 |
| North Korea                                   | 2.52 (1.49 to 3.67)              | 1.45 (0.94 to 2)                   |
| Taiwan                                        | 0.37 (0.33 to 0.41)              | 0.2 (0.18 to 0.22)                 |

|                                   | Estimate in 2017, male (95% UIs) | Estimate in 2017, female (95% UIs) |
|-----------------------------------|----------------------------------|------------------------------------|
| <b>Oceania</b>                    |                                  |                                    |
| American Samoa                    | 1.34 (1.08 to 1.73)              | 0.19 (0.15 to 0.25)                |
| Federated States of Micronesia    | 1.75 (0.97 to 2.66)              | 0.41 (0.25 to 0.59)                |
| Fiji                              | 0.76 (0.59 to 1.02)              | 0.23 (0.18 to 0.29)                |
| Guam                              | 0.6 (0.45 to 0.77)               | 0.13 (0.11 to 0.17)                |
| Kiribati                          | 2.6 (1.62 to 3.64)               | 1.28 (0.38 to 1.85)                |
| Marshall Islands                  | 2.03 (1.12 to 2.76)              | 0.49 (0.29 to 0.7)                 |
| Northern Mariana Islands          | 0.56 (0.42 to 0.71)              | 0.1 (0.08 to 0.14)                 |
| Papua New Guinea                  | 2.61 (1 to 4.56)                 | 0.68 (0.28 to 0.98)                |
| Samoa                             | 1.17 (0.73 to 1.95)              | 0.31 (0.21 to 0.45)                |
| Solomon Islands                   | 1.93 (1.02 to 2.93)              | 0.54 (0.31 to 0.72)                |
| Tonga                             | 2.22 (1.61 to 2.78)              | 0.93 (0.72 to 1.2)                 |
| Vanuatu                           | 2.04 (0.95 to 3.02)              | 0.48 (0.27 to 0.67)                |
| <b>Southeast Asia</b>             |                                  |                                    |
| Cambodia                          | 0.82 (0.5 to 1.1)                | 0.46 (0.29 to 0.6)                 |
| Indonesia                         | 0.63 (0.26 to 0.79)              | 0.2 (0.11 to 0.23)                 |
| Laos                              | 0.78 (0.43 to 1.08)              | 0.53 (0.3 to 0.7)                  |
| Malaysia                          | 1.04 (0.79 to 1.29)              | 0.48 (0.35 to 0.59)                |
| Maldives                          | 0.09 (0.07 to 0.12)              | 0.06 (0.05 to 0.07)                |
| Mauritius                         | 0.36 (0.31 to 0.41)              | 0.2 (0.17 to 0.22)                 |
| Myanmar                           | 2.42 (1 to 3.41)                 | 1.29 (0.67 to 1.67)                |
| Philippines                       | 0.31 (0.26 to 0.36)              | 0.22 (0.19 to 0.26)                |
| Sri Lanka                         | 0.5 (0.32 to 1)                  | 0.23 (0.17 to 0.35)                |
| Seychelles                        | 0.67 (0.56 to 0.94)              | 0.48 (0.4 to 0.6)                  |
| Thailand                          | 0.34 (0.2 to 0.42)               | 0.2 (0.13 to 0.24)                 |
| Timor-Leste                       | 0.71 (0.37 to 1.04)              | 0.43 (0.25 to 0.57)                |
| Vietnam                           | 1.7 (0.68 to 2.47)               | 0.16 (0.1 to 0.2)                  |
| <b>Sub-Saharan Africa</b>         |                                  |                                    |
| <b>Central Sub-Saharan Africa</b> |                                  |                                    |
| Angola                            | 1.77 (1.23 to 2.35)              | 0.88 (0.6 to 1.18)                 |
| Central African Republic          | 2.71 (1.44 to 4.13)              | 1.35 (0.67 to 2.05)                |
| Congo                             | 1.46 (0.93 to 2.17)              | 0.93 (0.47 to 1.34)                |
| Democratic Republic of the Congo  | 2.05 (1.14 to 3.99)              | 0.97 (0.61 to 1.35)                |
| Equatorial Guinea                 | 1.06 (0.64 to 2)                 | 0.58 (0.33 to 0.95)                |
| Gabon                             | 1.39 (0.97 to 2.22)              | 0.63 (0.4 to 1.03)                 |
| <b>Eastern Sub-Saharan Africa</b> |                                  |                                    |
| Burundi                           | 2.3 (1.57 to 3.29)               | 1.17 (0.8 to 1.55)                 |
| Comoros                           | 1.88 (1.2 to 2.95)               | 1.08 (0.73 to 1.51)                |
| Djibouti                          | 1.57 (1.01 to 2.54)              | 1.02 (0.61 to 1.66)                |
| Eritrea                           | 2.65 (1.89 to 3.54)              | 1.42 (0.91 to 1.88)                |
| Ethiopia                          | 1.73 (1.23 to 2.28)              | 1.1 (0.81 to 1.41)                 |
| Kenya                             | 2.99 (1.88 to 4.57)              | 0.77 (0.6 to 1.04)                 |
| Madagascar                        | 1.79 (1.26 to 2.56)              | 1.04 (0.73 to 1.42)                |
| Malawi                            | 2.02 (1.43 to 2.72)              | 0.86 (0.65 to 1.17)                |
| Mozambique                        | 2.78 (2.04 to 3.68)              | 1.22 (0.9 to 1.62)                 |
| Rwanda                            | 1.78 (1.24 to 2.59)              | 0.94 (0.63 to 1.39)                |
| Somalia                           | 2.51 (1.63 to 3.77)              | 1.35 (0.89 to 1.88)                |

|                                                                                                             | Estimate in 2017, male (95% UIs) | Estimate in 2017, female (95% UIs) |
|-------------------------------------------------------------------------------------------------------------|----------------------------------|------------------------------------|
| South Sudan                                                                                                 | 2.21 (1.37 to 3.45)              | 1.42 (0.95 to 1.92)                |
| Tanzania                                                                                                    | 1.66 (1.23 to 2.41)              | 1.08 (0.8 to 1.51)                 |
| Uganda                                                                                                      | 1.69 (1.14 to 2.36)              | 0.8 (0.56 to 1.13)                 |
| Zambia                                                                                                      | 1.9 (1.4 to 2.56)                | 0.97 (0.75 to 1.23)                |
| <b>Southern Sub-Saharan Africa</b>                                                                          |                                  |                                    |
| Botswana                                                                                                    | 1.11 (0.59 to 2.51)              | 0.96 (0.61 to 1.65)                |
| Lesotho                                                                                                     | 2.73 (1.76 to 4.5)               | 1.41 (0.92 to 2.36)                |
| Namibia                                                                                                     | 1.45 (0.95 to 2.46)              | 0.92 (0.53 to 1.78)                |
| South Africa                                                                                                | 1.01 (0.75 to 1.5)               | 0.78 (0.61 to 1.1)                 |
| Swaziland                                                                                                   | 2.29 (1.53 to 3.68)              | 1.28 (0.81 to 2.12)                |
| Zimbabwe                                                                                                    | 4.42 (2.9 to 5.84)               | 2.63 (1.63 to 3.55)                |
| <b>Western Sub-Saharan Africa</b>                                                                           |                                  |                                    |
| Benin                                                                                                       | 1.65 (1.22 to 2.25)              | 0.81 (0.45 to 1.1)                 |
| Burkina Faso                                                                                                | 2.23 (1.62 to 3.08)              | 1.27 (0.84 to 1.72)                |
| Cameroon                                                                                                    | 1.59 (1.15 to 2.25)              | 0.73 (0.33 to 1)                   |
| Cape Verde                                                                                                  | 0.91 (0.68 to 1.16)              | 0.44 (0.36 to 0.55)                |
| Chad                                                                                                        | 1.85 (1.3 to 2.71)               | 1.09 (0.58 to 1.58)                |
| Cote d'Ivoire                                                                                               | 1.66 (1.25 to 2.34)              | 0.91 (0.49 to 1.21)                |
| The Gambia                                                                                                  | 1.86 (1.31 to 2.54)              | 0.8 (0.44 to 1.06)                 |
| Ghana                                                                                                       | 1.92 (1.16 to 2.77)              | 0.71 (0.53 to 0.94)                |
| Guinea                                                                                                      | 1.99 (1.4 to 2.73)               | 1.04 (0.55 to 1.36)                |
| Guinea-Bissau                                                                                               | 2.01 (1.32 to 2.85)              | 0.98 (0.54 to 1.29)                |
| Liberia                                                                                                     | 1.5 (0.93 to 2.69)               | 0.74 (0.4 to 0.99)                 |
| Mali                                                                                                        | 1.74 (1.21 to 2.43)              | 1.14 (0.58 to 1.65)                |
| Mauritania                                                                                                  | 1.19 (0.75 to 1.99)              | 0.69 (0.37 to 0.94)                |
| Niger                                                                                                       | 1.89 (1.21 to 2.98)              | 0.98 (0.54 to 1.58)                |
| Nigeria                                                                                                     | 1.13 (0.81 to 1.73)              | 0.65 (0.31 to 0.99)                |
| Sao Tome and Principe                                                                                       | 2.02 (1.26 to 3)                 | 0.12 (0.07 to 0.18)                |
| Senegal                                                                                                     | 1.76 (1.31 to 2.51)              | 0.84 (0.49 to 1.2)                 |
| Sierra Leone                                                                                                | 1.7 (1.21 to 2.36)               | 0.93 (0.44 to 1.31)                |
| Togo                                                                                                        | 1.65 (1.18 to 2.42)              | 0.69 (0.37 to 0.92)                |
| <b>Indicator 3.a.1: Age-standardised prevalence of current smoking in populations aged 10 and older (%)</b> |                                  |                                    |
| <b>Central Europe, Eastern Europe, and Central Asia</b>                                                     |                                  |                                    |
| <b>Central Asia</b>                                                                                         |                                  |                                    |
| Armenia                                                                                                     | 46.39 (44.07 to 48.59)           | 2.15 (1.61 to 2.79)                |
| Azerbaijan                                                                                                  | 43.99 (41.71 to 46.15)           | 1.69 (1.37 to 2.08)                |
| Georgia                                                                                                     | 43.49 (40.97 to 45.8)            | 6.4 (5.02 to 8)                    |
| Kazakhstan                                                                                                  | 40.85 (38.91 to 43)              | 6.76 (5.42 to 8.36)                |
| Kyrgyzstan                                                                                                  | 36.32 (34.19 to 38.48)           | 3.65 (2.84 to 4.74)                |
| Mongolia                                                                                                    | 44.44 (42.13 to 46.73)           | 7.18 (5.69 to 8.87)                |
| Tajikistan                                                                                                  | 18.24 (16.57 to 20.04)           | 1.15 (0.86 to 1.51)                |
| Turkmenistan                                                                                                | 34.4 (31.91 to 37.04)            | 4.22 (3.29 to 5.28)                |
| Uzbekistan                                                                                                  | 21.41 (19.67 to 23.29)           | 1.33 (1.05 to 1.71)                |
| <b>Central Europe</b>                                                                                       |                                  |                                    |
| Albania                                                                                                     | 41.59 (39.24 to 43.97)           | 14.97 (12.76 to 17.38)             |
| Bosnia and Herzegovina                                                                                      | 38.74 (36.63 to 40.77)           | 26.94 (23.94 to 29.92)             |



|                                  | Estimate in 2017, male (95% UIs) | Estimate in 2017, female (95% UIs) |
|----------------------------------|----------------------------------|------------------------------------|
| Bulgaria                         | 38.57 (36.57 to 40.64)           | 30.6 (27.98 to 33.21)              |
| Croatia                          | 36.5 (34.49 to 38.66)            | 32.01 (29.42 to 34.88)             |
| Czech Republic                   | 34.45 (32.4 to 36.61)            | 23.34 (20.93 to 25.71)             |
| Hungary                          | 32.72 (30.38 to 35.02)           | 25.79 (23.14 to 28.84)             |
| Macedonia                        | 39.51 (37.12 to 41.89)           | 27.67 (23.9 to 31.2)               |
| Montenegro                       | 36.92 (34.93 to 39.06)           | 32.82 (30.12 to 35.57)             |
| Poland                           | 30.68 (28.65 to 32.54)           | 25.17 (22.84 to 27.5)              |
| Romania                          | 32.95 (30.77 to 35.15)           | 20.41 (18.06 to 22.94)             |
| Serbia                           | 32.78 (30.42 to 35.15)           | 28.87 (25.66 to 32.24)             |
| Slovakia                         | 29.75 (27.66 to 31.84)           | 19.68 (16.97 to 22.09)             |
| Slovenia                         | 28.47 (26.45 to 30.47)           | 24.13 (21.55 to 27.14)             |
| <b>Eastern Europe</b>            |                                  |                                    |
| Belarus                          | 46.32 (44.06 to 48.44)           | 21.21 (18.46 to 23.99)             |
| Estonia                          | 30.69 (28.57 to 32.66)           | 16.75 (14.58 to 19.1)              |
| Latvia                           | 42.31 (40.19 to 44.2)            | 20.38 (18.2 to 22.73)              |
| Lithuania                        | 36.84 (34.82 to 38.85)           | 19.34 (17.05 to 21.71)             |
| Moldova                          | 34.58 (32.39 to 36.56)           | 6.18 (4.9 to 7.73)                 |
| Russian Federation               | 41.51 (39.87 to 43.11)           | 14.57 (13.04 to 16.24)             |
| Ukraine                          | 41.34 (39.09 to 43.51)           | 15.29 (12.97 to 17.87)             |
| <b>High-income</b>               |                                  |                                    |
| <b>Australasia</b>               |                                  |                                    |
| Australia                        | 15.94 (14.4 to 17.5)             | 12.43 (10.33 to 14.72)             |
| New Zealand                      | 19.83 (18.6 to 21.09)            | 15.45 (14.22 to 16.77)             |
| <b>High-income Asia Pacific</b>  |                                  |                                    |
| Brunei                           | 27.6 (25.08 to 30.19)            | 5.45 (4.34 to 6.81)                |
| Japan                            | 32.36 (30.04 to 34.8)            | 10.89 (8.72 to 13.25)              |
| South Korea                      | 37.97 (35.67 to 40.36)           | 4.77 (3.69 to 6.05)                |
| Singapore                        | 19.03 (17.21 to 20.9)            | 8.39 (6.74 to 10.19)               |
| <b>High-income North America</b> |                                  |                                    |
| Canada                           | 17.36 (15.43 to 19.36)           | 15.18 (12.06 to 18.82)             |
| Greenland                        | 43.78 (40.88 to 46.8)            | 46.4 (41.3 to 51.47)               |
| United States                    | 22.2 (20.23 to 24.21)            | 16.09 (13.87 to 18.43)             |
| <b>Southern Latin America</b>    |                                  |                                    |
| Argentina                        | 27.19 (25.01 to 29.19)           | 17.84 (16.09 to 19.71)             |
| Chile                            | 33.88 (31.56 to 36.29)           | 29.05 (25.24 to 32.75)             |
| Uruguay                          | 25.69 (23.31 to 27.99)           | 19.64 (16.8 to 22.61)              |
| <b>Western Europe</b>            |                                  |                                    |
| Andorra                          | 28.1 (25.38 to 31.17)            | 22.39 (17.88 to 26.99)             |
| Austria                          | 33.02 (30.92 to 35.34)           | 24.43 (21.61 to 27.5)              |
| Belgium                          | 22.51 (20.8 to 24.18)            | 19.14 (16.71 to 21.82)             |
| Cyprus                           | 39.17 (36.84 to 41.28)           | 19.77 (17.04 to 22.65)             |
| Denmark                          | 20.26 (18.6 to 21.99)            | 19.33 (16.92 to 22)                |
| Finland                          | 22.51 (20.69 to 24.35)           | 16.78 (14.63 to 19.17)             |
| France                           | 33.31 (31.14 to 35.44)           | 30.37 (27.2 to 33.32)              |
| Germany                          | 29.75 (27.89 to 31.57)           | 22.88 (20.43 to 25.49)             |
| Greece                           | 38.6 (36.57 to 40.87)            | 30.43 (27.71 to 33.23)             |
| Iceland                          | 16.12 (14.38 to 18.01)           | 15 (12.06 to 18.6)                 |



|                                    | Estimate in 2017, male (95% UIs) | Estimate in 2017, female (95% UIs) |
|------------------------------------|----------------------------------|------------------------------------|
| Ireland                            | 20.67 (18.86 to 22.63)           | 19.46 (17.2 to 21.98)              |
| Israel                             | 25.54 (23.41 to 28.01)           | 15.8 (12.98 to 18.88)              |
| Italy                              | 27.5 (25.59 to 29.49)            | 18.53 (16.03 to 21.13)             |
| Luxembourg                         | 24.97 (22.63 to 27.23)           | 19.45 (16.31 to 22.64)             |
| Malta                              | 25.53 (23.12 to 28.06)           | 19.87 (16.9 to 23.02)              |
| Netherlands                        | 21.35 (19.55 to 23.07)           | 18.04 (15.76 to 20.62)             |
| Norway                             | 17.15 (15.48 to 19.11)           | 15.75 (12.98 to 18.87)             |
| Portugal                           | 29.32 (27.38 to 31.44)           | 19.71 (17.3 to 22.4)               |
| Spain                              | 30.19 (27.91 to 32.51)           | 25.49 (22.95 to 28.42)             |
| Sweden                             | 10.09 (8.96 to 11.27)            | 12.25 (10.18 to 14.46)             |
| Switzerland                        | 27.02 (24.8 to 29.6)             | 21.38 (17.89 to 25.5)              |
| United Kingdom                     | 22.77 (20.65 to 24.84)           | 20.79 (18.02 to 23.57)             |
| <b>Latin America and Caribbean</b> |                                  |                                    |
| <b>Andean Latin America</b>        |                                  |                                    |
| Bolivia                            | 10.21 (9.01 to 11.41)            | 6.93 (5.53 to 8.45)                |
| Ecuador                            | 18.89 (16.96 to 20.67)           | 5.48 (4.66 to 6.45)                |
| Peru                               | 10.89 (9.58 to 12.29)            | 4.61 (3.88 to 5.33)                |
| <b>Caribbean</b>                   |                                  |                                    |
| Antigua and Barbuda                | 14.26 (12.65 to 16.13)           | 6.08 (4.63 to 7.9)                 |
| The Bahamas                        | 14.55 (12.92 to 16.45)           | 6 (4.59 to 7.67)                   |
| Barbados                           | 16.01 (14.15 to 17.95)           | 5.96 (4.85 to 7.13)                |
| Belize                             | 18.37 (16.63 to 20.2)            | 2.99 (2.46 to 3.58)                |
| Bermuda                            | 17.1 (15.33 to 19.09)            | 8.34 (6.53 to 10.52)               |
| Cuba                               | 32.81 (30.01 to 35.56)           | 20.69 (17.16 to 24.5)              |
| Dominica                           | 15.06 (13.22 to 16.93)           | 5.37 (4.12 to 6.76)                |
| Dominican Republic                 | 12.35 (11.21 to 13.63)           | 7.49 (6.35 to 8.84)                |
| Grenada                            | 18.71 (16.84 to 20.79)           | 6.04 (4.87 to 7.45)                |
| Guyana                             | 22.85 (20.66 to 25.13)           | 6.08 (4.94 to 7.37)                |
| Haiti                              | 10.1 (9.09 to 11.23)             | 4.07 (3.14 to 5.18)                |
| Jamaica                            | 23.99 (21.65 to 26.38)           | 9.1 (7.43 to 10.99)                |
| Puerto Rico                        | 15.7 (14.28 to 17.21)            | 8.03 (6.56 to 9.66)                |
| Saint Lucia                        | 20.45 (18.28 to 22.69)           | 9.11 (7.27 to 11.36)               |
| Saint Vincent and the Grenadines   | 19.67 (17.68 to 21.91)           | 6.25 (4.78 to 8.03)                |
| Suriname                           | 31.6 (29.1 to 34.24)             | 10.03 (7.89 to 12.61)              |
| Trinidad and Tobago                | 26.39 (24.26 to 28.83)           | 7.65 (6.14 to 9.32)                |
| Virgin Islands, U.S.               | 8.21 (7.23 to 9.32)              | 5.06 (3.81 to 6.5)                 |
| <b>Central Latin America</b>       |                                  |                                    |
| Colombia                           | 15.71 (14.01 to 17.33)           | 10.04 (8.71 to 11.54)              |
| Costa Rica                         | 17.71 (16.29 to 19.16)           | 8.17 (6.71 to 9.8)                 |
| El Salvador                        | 12.97 (11.45 to 14.62)           | 3 (2.25 to 4.06)                   |
| Guatemala                          | 17.19 (15.62 to 18.82)           | 3.31 (2.48 to 4.54)                |
| Honduras                           | 20.88 (18.76 to 22.98)           | 4.83 (3.9 to 5.92)                 |
| Mexico                             | 23.92 (22.47 to 25.44)           | 8.5 (7.2 to 9.98)                  |
| Nicaragua                          | 19.43 (17.4 to 21.64)            | 4.31 (3.3 to 5.62)                 |
| Panama                             | 11.43 (10.16 to 12.92)           | 3.74 (3.12 to 4.46)                |
| Venezuela                          | 20.69 (18.5 to 22.97)            | 11.02 (8.64 to 13.79)              |
| <b>Tropical Latin America</b>      |                                  |                                    |

|                                        | Estimate in 2017, male (95% UIs) | Estimate in 2017, female (95% UIs) |
|----------------------------------------|----------------------------------|------------------------------------|
| Brazil                                 | 11.66 (10.79 to 12.66)           | 7.54 (6.46 to 8.75)                |
| Paraguay                               | 20.95 (19.04 to 22.83)           | 7.29 (6.1 to 8.61)                 |
| North Africa and Middle East           |                                  |                                    |
| North Africa and Middle East           |                                  |                                    |
| Afghanistan                            | 18.79 (16.98 to 20.64)           | 2.59 (2.13 to 3.15)                |
| Algeria                                | 32.04 (28.97 to 35)              | 3.74 (2.83 to 4.94)                |
| Bahrain                                | 17.9 (15.79 to 19.91)            | 4.02 (3.08 to 5.2)                 |
| Egypt                                  | 36.43 (34.23 to 38.8)            | 1.23 (0.99 to 1.55)                |
| Iran                                   | 21.97 (20.02 to 23.9)            | 5.02 (3.92 to 6.2)                 |
| Iraq                                   | 32.88 (30.35 to 35.26)           | 4.54 (3.54 to 5.77)                |
| Jordan                                 | 36.76 (34.23 to 39.4)            | 11.98 (10.31 to 13.76)             |
| Kuwait                                 | 30.05 (27.9 to 32.29)            | 4.23 (3.6 to 5)                    |
| Lebanon                                | 37.36 (35.32 to 39.66)           | 22.22 (19.7 to 24.77)              |
| Libya                                  | 28.32 (26.15 to 30.42)           | 1.06 (0.78 to 1.47)                |
| Morocco                                | 20.47 (18.55 to 22.55)           | 1.24 (0.99 to 1.55)                |
| Palestine                              | 36.31 (34.04 to 38.45)           | 5.87 (5.02 to 6.76)                |
| Oman                                   | 13.13 (11.61 to 14.76)           | 2.35 (1.89 to 2.88)                |
| Qatar                                  | 19.37 (17.66 to 21.14)           | 3.46 (2.66 to 4.54)                |
| Saudi Arabia                           | 17.19 (15.73 to 18.8)            | 1.91 (1.51 to 2.48)                |
| Sudan                                  | 10.96 (9.65 to 12.27)            | 1.75 (1.28 to 2.32)                |
| Syria                                  | 30.2 (27.58 to 32.87)            | 4.42 (3.42 to 5.72)                |
| Tunisia                                | 40.78 (37.92 to 43.36)           | 3.12 (2.4 to 3.9)                  |
| Turkey                                 | 38.11 (36.06 to 40.1)            | 12.12 (10.65 to 13.71)             |
| United Arab Emirates                   | 23.09 (20.77 to 25.48)           | 3.83 (2.95 to 4.92)                |
| Yemen                                  | 26.03 (24.21 to 27.83)           | 7.95 (6.59 to 9.41)                |
| South Asia                             |                                  |                                    |
| South Asia                             |                                  |                                    |
| Bangladesh                             | 40.28 (38.11 to 42.41)           | 1.28 (1 to 1.66)                   |
| Bhutan                                 | 10.83 (9.6 to 12.13)             | 3.69 (2.98 to 4.53)                |
| India                                  | 20.2 (18.93 to 21.52)            | 2.25 (1.78 to 2.83)                |
| Nepal                                  | 29.63 (27.71 to 31.6)            | 12.75 (11.19 to 14.6)              |
| Pakistan                               | 23.2 (21.59 to 24.93)            | 3.14 (2.54 to 3.84)                |
| Southeast Asia, East Asia, and Oceania |                                  |                                    |
| East Asia                              |                                  |                                    |
| China                                  | 43.77 (41.53 to 45.75)           | 2.77 (2.29 to 3.32)                |
| North Korea                            | 39.35 (37.03 to 41.76)           | 0.37 (0.26 to 0.55)                |
| Taiwan                                 | 30.82 (28.44 to 33.1)            | 5.55 (4.5 to 6.94)                 |
| Oceania                                |                                  |                                    |
| American Samoa                         | 35.13 (32.42 to 38.1)            | 19.04 (15.37 to 22.96)             |
| Federated States of Micronesia         | 40.05 (37.06 to 43.27)           | 17.25 (14.27 to 20.71)             |
| Fiji                                   | 38.13 (35.66 to 40.43)           | 12.12 (10 to 14.59)                |
| Guam                                   | 30 (28.11 to 31.99)              | 21.12 (18.67 to 23.68)             |
| Kiribati                               | 51.91 (49.48 to 54.38)           | 30.83 (27.06 to 34.58)             |
| Marshall Islands                       | 29.7 (27.18 to 32.2)             | 7.19 (5.63 to 9.05)                |
| Northern Mariana Islands               | 34.8 (31.71 to 37.84)            | 16.69 (12.97 to 20.94)             |
| Papua New Guinea                       | 42.99 (40.21 to 45.82)           | 20.65 (17.86 to 23.57)             |
| Samoa                                  | 40.6 (37.78 to 43.15)            | 16.07 (13.55 to 18.92)             |

|                                    | Estimate in 2017, male (95% UIs) | Estimate in 2017, female (95% UIs) |
|------------------------------------|----------------------------------|------------------------------------|
| Solomon Islands                    | 37.22 (34.62 to 39.77)           | 14.1 (11.39 to 16.92)              |
| Tonga                              | 42.01 (39.49 to 44.6)            | 14.13 (11.63 to 16.73)             |
| Vanuatu                            | 35.86 (33.72 to 38.01)           | 4.9 (3.9 to 6.18)                  |
| <b>Southeast Asia</b>              |                                  |                                    |
| Cambodia                           | 37.18 (35.3 to 39.07)            | 4.74 (3.71 to 5.87)                |
| Indonesia                          | 55.75 (53.59 to 57.75)           | 3.47 (2.67 to 4.39)                |
| Laos                               | 38.79 (36.26 to 41.4)            | 6.94 (5.6 to 8.5)                  |
| Malaysia                           | 37.78 (35.49 to 40.1)            | 2.84 (2.28 to 3.56)                |
| Maldives                           | 34.33 (32.28 to 36.48)           | 6.19 (5.2 to 7.35)                 |
| Mauritius                          | 37.27 (34.72 to 39.78)           | 5.17 (4.3 to 6.25)                 |
| Myanmar                            | 33.76 (32.08 to 35.58)           | 8.43 (7.11 to 9.89)                |
| Philippines                        | 37.42 (35.5 to 39.51)            | 8.1 (6.73 to 9.72)                 |
| Sri Lanka                          | 24.94 (23.47 to 26.48)           | 1.34 (1.03 to 1.72)                |
| Seychelles                         | 31.46 (28.98 to 34.06)           | 6.46 (5.16 to 8.08)                |
| Thailand                           | 36.41 (34.46 to 38.4)            | 2.99 (2.33 to 3.79)                |
| Timor-Leste                        | 59.7 (57.65 to 61.87)            | 5.51 (4.62 to 6.82)                |
| Vietnam                            | 40.14 (38.47 to 41.78)           | 1.39 (1.2 to 1.63)                 |
| <b>Sub-Saharan Africa</b>          |                                  |                                    |
| <b>Central Sub-Saharan Africa</b>  |                                  |                                    |
| Angola                             | 16.9 (15.43 to 18.51)            | 3.24 (2.33 to 4.73)                |
| Central African Republic           | 16.09 (14.32 to 17.91)           | 2.21 (1.48 to 3.36)                |
| Congo                              | 16.67 (15.16 to 18.31)           | 3.03 (2.17 to 4.09)                |
| Democratic Republic of the Congo   | 18 (16.09 to 19.92)              | 1.57 (1.1 to 2.33)                 |
| Equatorial Guinea                  | 14.24 (12.57 to 16.01)           | 2.23 (1.62 to 3.04)                |
| Gabon                              | 17.75 (15.84 to 19.85)           | 3.16 (2.38 to 4.3)                 |
| <b>Eastern Sub-Saharan Africa</b>  |                                  |                                    |
| Burundi                            | 13.5 (11.89 to 15.19)            | 5.74 (4.5 to 7.03)                 |
| Comoros                            | 16.8 (15.21 to 18.55)            | 2.72 (2.28 to 3.22)                |
| Djibouti                           | 26.23 (24.06 to 28.52)           | 4.15 (3.35 to 5.1)                 |
| Eritrea                            | 7.07 (6.15 to 8.05)              | 0.36 (0.25 to 0.52)                |
| Ethiopia                           | 6.7 (6.04 to 7.37)               | 0.92 (0.7 to 1.27)                 |
| Kenya                              | 16.95 (15.58 to 18.33)           | 2.7 (2.15 to 3.49)                 |
| Madagascar                         | 22.58 (20.57 to 24.71)           | 2.18 (1.49 to 3.14)                |
| Malawi                             | 17.39 (15.79 to 19.23)           | 3.12 (2.45 to 3.96)                |
| Mozambique                         | 18.54 (16.91 to 20.13)           | 4.97 (4.07 to 5.97)                |
| Rwanda                             | 16.65 (15.36 to 18.09)           | 5.59 (4.56 to 6.61)                |
| Somalia                            | 12.13 (10.68 to 13.68)           | 1.62 (1.18 to 2.19)                |
| South Sudan                        | 16.27 (14.44 to 18.2)            | 2.08 (1.54 to 2.81)                |
| Tanzania                           | 20.04 (18.29 to 21.94)           | 3.28 (2.61 to 4.08)                |
| Uganda                             | 15.27 (14.09 to 16.54)           | 4.24 (3.41 to 5.22)                |
| Zambia                             | 23.15 (21.18 to 25.24)           | 8.1 (6.54 to 9.77)                 |
| <b>Southern Sub-Saharan Africa</b> |                                  |                                    |
| Botswana                           | 25.7 (23.41 to 27.98)            | 8.34 (6.64 to 10.23)               |
| Lesotho                            | 32.5 (30.34 to 34.64)            | 1.69 (1.13 to 2.58)                |
| Namibia                            | 23.09 (21.21 to 25.12)           | 10.05 (8.15 to 12.1)               |
| South Africa                       | 29.14 (27.2 to 31.08)            | 11.12 (9.11 to 13.59)              |
| Swaziland                          | 8.03 (7.04 to 9.03)              | 1.97 (1.52 to 2.59)                |

|                                                                                                             | Estimate in 2017, male (95% UIs) | Estimate in 2017, female (95% UIs) |
|-------------------------------------------------------------------------------------------------------------|----------------------------------|------------------------------------|
| Zimbabwe                                                                                                    | 27.75 (25.84 to 29.84)           | 4.25 (3.39 to 5.27)                |
| <b>Western Sub-Saharan Africa</b>                                                                           |                                  |                                    |
| Benin                                                                                                       | 11.9 (10.7 to 13.21)             | 1.88 (1.43 to 2.5)                 |
| Burkina Faso                                                                                                | 16.63 (14.97 to 18.33)           | 0.76 (0.59 to 1)                   |
| Cameroon                                                                                                    | 13.47 (12.16 to 14.96)           | 1.09 (0.79 to 1.56)                |
| Cape Verde                                                                                                  | 11.52 (10.22 to 13.04)           | 2.35 (1.75 to 3.07)                |
| Chad                                                                                                        | 15.2 (13.82 to 16.6)             | 2.01 (1.52 to 2.68)                |
| Cote d'Ivoire                                                                                               | 20.23 (18.33 to 22.38)           | 3.35 (2.49 to 4.32)                |
| The Gambia                                                                                                  | 19.97 (18.36 to 21.72)           | 1.16 (0.74 to 1.8)                 |
| Ghana                                                                                                       | 7.83 (6.94 to 8.83)              | 1.4 (1 to 2.04)                    |
| Guinea                                                                                                      | 11.81 (10.25 to 13.43)           | 1.15 (0.8 to 1.73)                 |
| Guinea-Bissau                                                                                               | 9.87 (8.61 to 11.32)             | 0.92 (0.63 to 1.34)                |
| Liberia                                                                                                     | 11.83 (10.58 to 13.07)           | 1.6 (1.19 to 2.15)                 |
| Mali                                                                                                        | 17.99 (16.37 to 19.85)           | 1.24 (0.83 to 1.82)                |
| Mauritania                                                                                                  | 24.98 (22.54 to 27.48)           | 7.83 (6.04 to 10.12)               |
| Niger                                                                                                       | 14.12 (12.52 to 15.82)           | 0.67 (0.49 to 0.93)                |
| Nigeria                                                                                                     | 6.75 (5.87 to 7.74)              | 0.96 (0.67 to 1.39)                |
| Sao Tome and Principe                                                                                       | 6.59 (5.79 to 7.46)              | 1.15 (0.8 to 1.6)                  |
| Senegal                                                                                                     | 17.47 (15.76 to 19.32)           | 1.48 (1.11 to 1.94)                |
| Sierra Leone                                                                                                | 25.92 (24.06 to 27.96)           | 4.94 (4.11 to 5.99)                |
| Togo                                                                                                        | 12.26 (10.97 to 13.58)           | 1.52 (1.09 to 2.07)                |
| <b>Indicator 16.1.1: Age-standardised death rate due to interpersonal violence (per 100,000 population)</b> |                                  |                                    |
| <b>Central Europe, Eastern Europe, and Central Asia</b>                                                     |                                  |                                    |
| <b>Central Asia</b>                                                                                         |                                  |                                    |
| Armenia                                                                                                     | 5.27 (4.79 to 5.76)              | 1.26 (1.15 to 1.38)                |
| Azerbaijan                                                                                                  | 5.77 (4.02 to 10.21)             | 1.24 (0.93 to 2.12)                |
| Georgia                                                                                                     | 5.99 (5.34 to 6.67)              | 0.97 (0.86 to 1.09)                |
| Kazakhstan                                                                                                  | 13.14 (11.82 to 14.48)           | 3.18 (2.87 to 3.51)                |
| Kyrgyzstan                                                                                                  | 6.98 (6.26 to 7.8)               | 1.95 (1.75 to 2.23)                |
| Mongolia                                                                                                    | 12.95 (9.93 to 16.6)             | 2.45 (1.67 to 3.26)                |
| Tajikistan                                                                                                  | 4.72 (3.76 to 7.48)              | 1.31 (1.01 to 2.25)                |
| Turkmenistan                                                                                                | 6.09 (5.27 to 6.95)              | 1.61 (1.39 to 1.86)                |
| Uzbekistan                                                                                                  | 3.99 (3.39 to 4.7)               | 1.13 (0.95 to 1.34)                |
| <b>Central Europe</b>                                                                                       |                                  |                                    |
| Albania                                                                                                     | 3.68 (2.66 to 5.53)              | 0.87 (0.61 to 1.27)                |
| Bosnia and Herzegovina                                                                                      | 3.12 (2.09 to 3.73)              | 0.85 (0.48 to 1.02)                |
| Bulgaria                                                                                                    | 2.9 (2.59 to 3.23)               | 1.04 (0.92 to 1.16)                |
| Croatia                                                                                                     | 1.07 (0.95 to 1.2)               | 0.69 (0.6 to 0.82)                 |
| Czech Republic                                                                                              | 1.15 (1.02 to 1.28)              | 0.73 (0.65 to 0.81)                |
| Hungary                                                                                                     | 1.58 (1.43 to 1.75)              | 0.91 (0.8 to 1.06)                 |
| Macedonia                                                                                                   | 2.21 (1.38 to 2.67)              | 0.81 (0.5 to 0.99)                 |
| Montenegro                                                                                                  | 3.94 (3.13 to 5.41)              | 1.87 (1.44 to 2.75)                |
| Poland                                                                                                      | 2.1 (1.88 to 2.34)               | 0.63 (0.57 to 0.71)                |
| Romania                                                                                                     | 2.27 (2.05 to 2.5)               | 0.95 (0.85 to 1.05)                |
| Serbia                                                                                                      | 2.77 (1.91 to 3.38)              | 1.17 (0.88 to 1.64)                |
| Slovakia                                                                                                    | 2.69 (2.22 to 3.93)              | 1.2 (0.92 to 1.76)                 |

|                                  | Estimate in 2017, male (95% UIs) | Estimate in 2017, female (95% UIs) |
|----------------------------------|----------------------------------|------------------------------------|
| Slovenia                         | 0.94 (0.84 to 1.06)              | 0.61 (0.53 to 0.7)                 |
| <b>Eastern Europe</b>            |                                  |                                    |
| Belarus                          | 8.14 (7.06 to 9.07)              | 2.75 (2.44 to 3.12)                |
| Estonia                          | 5.79 (4.79 to 7.05)              | 1.68 (1.37 to 2.05)                |
| Latvia                           | 8.5 (7.15 to 10)                 | 2.6 (2.12 to 3.16)                 |
| Lithuania                        | 7.58 (6.83 to 8.5)               | 2.29 (2.01 to 2.59)                |
| Moldova                          | 7.42 (6.83 to 8.09)              | 2.38 (2.17 to 2.64)                |
| Russian Federation               | 19.8 (19.19 to 20.39)            | 5.32 (5.1 to 5.69)                 |
| Ukraine                          | 13.76 (12.56 to 15.26)           | 3.56 (3.1 to 3.98)                 |
| <b>High-income</b>               |                                  |                                    |
| <b>Australasia</b>               |                                  |                                    |
| Australia                        | 1.72 (1.46 to 2.01)              | 0.82 (0.7 to 0.97)                 |
| New Zealand                      | 1.83 (1.66 to 2.02)              | 0.88 (0.8 to 0.97)                 |
| <b>High-income Asia Pacific</b>  |                                  |                                    |
| Brunei                           | 1.89 (1.22 to 2.29)              | 0.86 (0.5 to 1.06)                 |
| Japan                            | 0.53 (0.49 to 0.56)              | 0.39 (0.36 to 0.43)                |
| South Korea                      | 1.21 (1.07 to 1.35)              | 0.87 (0.77 to 0.97)                |
| Singapore                        | 0.43 (0.38 to 0.49)              | 0.38 (0.34 to 0.43)                |
| <b>High-income North America</b> |                                  |                                    |
| Canada                           | 2.23 (1.94 to 2.52)              | 0.75 (0.66 to 0.84)                |
| Greenland                        | 7.73 (6.32 to 10.7)              | 7.48 (5.33 to 9.2)                 |
| United States                    | 9.8 (9.32 to 10.41)              | 2.62 (2.46 to 2.75)                |
| <b>Southern Latin America</b>    |                                  |                                    |
| Argentina                        | 10.03 (8.45 to 11.83)            | 1.78 (1.52 to 2.08)                |
| Chile                            | 7.28 (6.22 to 8.58)              | 1.01 (0.86 to 1.18)                |
| Uruguay                          | 10.15 (8.55 to 11.87)            | 1.71 (1.42 to 2.05)                |
| <b>Western Europe</b>            |                                  |                                    |
| Andorra                          | 0.83 (0.61 to 1.39)              | 0.44 (0.33 to 0.8)                 |
| Austria                          | 0.72 (0.63 to 0.81)              | 0.61 (0.54 to 0.69)                |
| Belgium                          | 1.4 (1.25 to 1.56)               | 0.94 (0.83 to 1.05)                |
| Cyprus                           | 1.98 (1.1 to 2.47)               | 0.74 (0.44 to 0.93)                |
| Denmark                          | 0.88 (0.77 to 0.99)              | 0.59 (0.52 to 0.67)                |
| Finland                          | 1.97 (1.74 to 2.22)              | 0.89 (0.79 to 1.02)                |
| France                           | 1.02 (0.9 to 1.14)               | 0.5 (0.45 to 0.56)                 |
| Germany                          | 0.77 (0.67 to 0.89)              | 0.6 (0.51 to 0.7)                  |
| Greece                           | 1.5 (1.34 to 1.67)               | 0.5 (0.44 to 0.57)                 |
| Iceland                          | 0.85 (0.76 to 0.95)              | 0.47 (0.42 to 0.53)                |
| Ireland                          | 1 (0.85 to 1.15)                 | 0.29 (0.26 to 0.34)                |
| Israel                           | 3.23 (2.87 to 3.65)              | 0.9 (0.8 to 1.01)                  |
| Italy                            | 0.92 (0.81 to 1.03)              | 0.37 (0.33 to 0.42)                |
| Luxembourg                       | 0.91 (0.77 to 1.07)              | 0.89 (0.77 to 1.03)                |
| Malta                            | 1.38 (1.23 to 1.55)              | 0.76 (0.67 to 0.85)                |
| Netherlands                      | 1 (0.89 to 1.12)                 | 0.57 (0.51 to 0.64)                |
| Norway                           | 0.76 (0.7 to 0.81)               | 0.56 (0.53 to 0.61)                |
| Portugal                         | 1.44 (1.25 to 1.63)              | 0.69 (0.61 to 0.8)                 |
| Spain                            | 0.76 (0.68 to 0.85)              | 0.41 (0.36 to 0.46)                |
| Sweden                           | 1.49 (1.35 to 1.65)              | 0.67 (0.6 to 0.74)                 |

|                                     | Estimate in 2017, male (95% UIs) | Estimate in 2017, female (95% UIs) |
|-------------------------------------|----------------------------------|------------------------------------|
| Switzerland                         | 0.55 (0.47 to 0.62)              | 0.56 (0.49 to 0.65)                |
| United Kingdom                      | 0.68 (0.65 to 0.7)               | 0.32 (0.31 to 0.34)                |
| <b>Latin America and Caribbean</b>  |                                  |                                    |
| <b>Andean Latin America</b>         |                                  |                                    |
| Bolivia                             | 9.35 (5.88 to 13.05)             | 2.47 (1.52 to 3.44)                |
| Ecuador                             | 23.22 (20.05 to 26.61)           | 3.91 (3.34 to 4.48)                |
| Peru                                | 5.76 (3.87 to 7.41)              | 1.26 (0.75 to 1.64)                |
| <b>Caribbean</b>                    |                                  |                                    |
| Antigua and Barbuda                 | 8.09 (7.1 to 9.23)               | 1.94 (1.65 to 2.25)                |
| The Bahamas                         | 47.19 (41.67 to 53.34)           | 6.36 (5.43 to 7.45)                |
| Barbados                            | 16.51 (14.3 to 18.85)            | 4.59 (3.94 to 5.27)                |
| Belize                              | 46.54 (43.36 to 50.21)           | 5.19 (4.63 to 5.83)                |
| Bermuda                             | 4.87 (4.11 to 5.77)              | 0.94 (0.79 to 1.12)                |
| Cuba                                | 8.25 (6.99 to 9.7)               | 2.59 (2.16 to 3.08)                |
| Dominica                            | 18.28 (16.17 to 20.42)           | 4.08 (3.44 to 4.8)                 |
| Dominican Republic                  | 36.57 (21.02 to 45.83)           | 5.46 (2.73 to 7.13)                |
| Grenada                             | 7.62 (6.75 to 8.56)              | 2.3 (2 to 2.63)                    |
| Guyana                              | 26.91 (22.58 to 31.62)           | 6.45 (5.21 to 7.81)                |
| Haiti                               | 28.49 (17.83 to 46.94)           | 9.12 (5.52 to 12.98)               |
| Jamaica                             | 51.54 (41.31 to 63.38)           | 7.18 (5.47 to 9.24)                |
| Puerto Rico                         | 40.24 (36.79 to 43.61)           | 3.4 (2.99 to 3.85)                 |
| Saint Lucia                         | 29.85 (26.78 to 32.75)           | 4.04 (3.53 to 4.6)                 |
| Saint Vincent and the Grenadines    | 31.62 (28.55 to 34.72)           | 7.38 (6.33 to 8.49)                |
| Suriname                            | 13.31 (11.17 to 15.86)           | 4.21 (3.51 to 5)                   |
| Trinidad and Tobago                 | 36.87 (28.19 to 47.12)           | 5.23 (3.83 to 6.99)                |
| Virgin Islands, U.S.                | 48.77 (43.54 to 56.07)           | 6.28 (4.98 to 7.77)                |
| <b>Central Latin America</b>        |                                  |                                    |
| Colombia                            | 51.2 (43.22 to 61.33)            | 6.03 (5.08 to 7.06)                |
| Costa Rica                          | 17.34 (15.42 to 19.55)           | 2.05 (1.79 to 2.33)                |
| El Salvador                         | 104.69 (72.79 to 131.5)          | 11.06 (6.63 to 14.71)              |
| Guatemala                           | 66.06 (57.22 to 75.53)           | 8.98 (7.66 to 10.37)               |
| Honduras                            | 72.77 (47.84 to 93.73)           | 22.39 (10.31 to 31.76)             |
| Mexico                              | 57.88 (56.89 to 58.91)           | 8.56 (8.4 to 8.71)                 |
| Nicaragua                           | 12.78 (10.29 to 18.77)           | 2.14 (1.61 to 3.19)                |
| Panama                              | 28.12 (25.34 to 31.01)           | 3.43 (2.98 to 3.9)                 |
| Venezuela                           | 82.27 (67.42 to 98.49)           | 6.07 (4.82 to 7.42)                |
| <b>Tropical Latin America</b>       |                                  |                                    |
| Brazil                              | 51.18 (50.22 to 52.11)           | 4.9 (4.73 to 5.08)                 |
| Paraguay                            | 20.73 (15.26 to 28.5)            | 2.93 (2.12 to 4.3)                 |
| <b>North Africa and Middle East</b> |                                  |                                    |
| <b>North Africa and Middle East</b> |                                  |                                    |
| Afghanistan                         | 22 (11.29 to 31.09)              | 1.9 (1.3 to 2.84)                  |
| Algeria                             | 1.56 (0.93 to 1.98)              | 0.44 (0.3 to 0.55)                 |
| Bahrain                             | 1.67 (1.1 to 2.12)               | 0.77 (0.44 to 0.97)                |
| Egypt                               | 1.02 (0.47 to 1.34)              | 0.3 (0.16 to 0.39)                 |
| Iran                                | 3.29 (2.14 to 3.68)              | 1.03 (0.57 to 1.2)                 |
| Iraq                                | 8.45 (4.51 to 10.21)             | 2.82 (1.39 to 3.56)                |

|                                        | Estimate in 2017, male (95% UIs) | Estimate in 2017, female (95% UIs) |
|----------------------------------------|----------------------------------|------------------------------------|
| Jordan                                 | 3.85 (2.19 to 4.71)              | 1.08 (0.51 to 1.4)                 |
| Kuwait                                 | 1.2 (1.05 to 1.37)               | 0.26 (0.22 to 0.33)                |
| Lebanon                                | 7.07 (3.75 to 9.51)              | 1 (0.62 to 1.58)                   |
| Libya                                  | 3.44 (1.66 to 4.87)              | 0.77 (0.44 to 1.12)                |
| Morocco                                | 1.67 (0.81 to 2.35)              | 0.51 (0.29 to 0.7)                 |
| Palestine                              | 9.15 (3.4 to 11.22)              | 2.14 (0.65 to 2.98)                |
| Oman                                   | 0.56 (0.4 to 0.83)               | 0.34 (0.22 to 0.46)                |
| Qatar                                  | 0.94 (0.64 to 1.25)              | 0.4 (0.2 to 0.54)                  |
| Saudi Arabia                           | 1.03 (0.47 to 1.47)              | 0.27 (0.18 to 0.38)                |
| Sudan                                  | 1.69 (0.37 to 2.45)              | 0.55 (0.16 to 0.82)                |
| Syria                                  | 3.13 (1.53 to 4.2)               | 0.94 (0.43 to 1.29)                |
| Tunisia                                | 0.88 (0.53 to 1.22)              | 0.21 (0.15 to 0.3)                 |
| Turkey                                 | 3.25 (1.85 to 3.98)              | 0.67 (0.4 to 0.82)                 |
| United Arab Emirates                   | 1.27 (0.87 to 1.82)              | 0.31 (0.22 to 0.46)                |
| Yemen                                  | 4.8 (2.87 to 6.8)                | 1.33 (0.83 to 1.78)                |
| South Asia                             |                                  |                                    |
| South Asia                             |                                  |                                    |
| Bangladesh                             | 2.21 (1.69 to 3.77)              | 0.88 (0.64 to 1.69)                |
| Bhutan                                 | 1.39 (0.81 to 1.89)              | 0.38 (0.24 to 0.54)                |
| India                                  | 4.44 (3.34 to 5.63)              | 1.57 (1.14 to 2.06)                |
| Nepal                                  | 2.57 (0.91 to 3.8)               | 0.78 (0.36 to 1.05)                |
| Pakistan                               | 5.65 (2.83 to 8.28)              | 2.81 (1.82 to 3.68)                |
| Southeast Asia, East Asia, and Oceania |                                  |                                    |
| East Asia                              |                                  |                                    |
| China                                  | 1.21 (1.04 to 1.84)              | 0.65 (0.51 to 0.94)                |
| North Korea                            | 3.45 (2.28 to 4.9)               | 1.69 (1.08 to 2.33)                |
| Taiwan                                 | 1.64 (1.48 to 1.81)              | 0.7 (0.63 to 0.78)                 |
| Oceania                                |                                  |                                    |
| American Samoa                         | 8.96 (7.31 to 13.31)             | 2.01 (1.32 to 2.57)                |
| Federated States of Micronesia         | 7.99 (4.26 to 11.93)             | 3.38 (1.63 to 5.17)                |
| Fiji                                   | 5.71 (3.36 to 7.24)              | 2.09 (1.14 to 2.68)                |
| Guam                                   | 6.44 (4.98 to 8.49)              | 2.87 (1.69 to 3.54)                |
| Kiribati                               | 2.76 (1.55 to 7.94)              | 0.84 (0.5 to 2.02)                 |
| Marshall Islands                       | 9.26 (5.17 to 12.34)             | 2.98 (1.89 to 4.31)                |
| Northern Mariana Islands               | 6.76 (5.21 to 9.74)              | 2.54 (1.72 to 3.35)                |
| Papua New Guinea                       | 16.87 (8.51 to 23.05)            | 4.43 (2.99 to 6.32)                |
| Samoa                                  | 4.55 (2.87 to 7.48)              | 2.19 (1.16 to 3.31)                |
| Solomon Islands                        | 8.31 (4.17 to 11.35)             | 2.81 (1.87 to 3.98)                |
| Tonga                                  | 3.5 (1.93 to 10.17)              | 1.12 (0.57 to 3.25)                |
| Vanuatu                                | 2.79 (1.5 to 3.98)               | 0.77 (0.46 to 1.26)                |
| Southeast Asia                         |                                  |                                    |
| Cambodia                               | 3.85 (2.52 to 5.4)               | 0.87 (0.58 to 1.22)                |
| Indonesia                              | 1.37 (1.14 to 2)                 | 0.53 (0.36 to 0.67)                |
| Laos                                   | 4.53 (2.75 to 6.78)              | 1.79 (1 to 2.36)                   |
| Malaysia                               | 2.91 (1.86 to 5.33)              | 0.62 (0.42 to 1.34)                |
| Maldives                               | 1.09 (0.51 to 1.33)              | 0.34 (0.14 to 0.45)                |
| Mauritius                              | 3.21 (2.82 to 3.64)              | 1.29 (1.14 to 1.47)                |



|                                    | Estimate in 2017, male (95% UIs) | Estimate in 2017, female (95% UIs) |
|------------------------------------|----------------------------------|------------------------------------|
| Myanmar                            | 2.5 (1.56 to 3.44)               | 0.75 (0.37 to 1.03)                |
| Philippines                        | 27.54 (22.63 to 33.19)           | 3.68 (3.06 to 4.44)                |
| Sri Lanka                          | 5.68 (4.05 to 8.04)              | 1.09 (0.7 to 1.48)                 |
| Seychelles                         | 7.7 (4.7 to 9.28)                | 2.79 (1.55 to 3.35)                |
| Thailand                           | 9.41 (5.72 to 11.98)             | 1.48 (1.06 to 1.93)                |
| Timor-Leste                        | 4.57 (1.88 to 6.41)              | 1.15 (0.58 to 1.53)                |
| Vietnam                            | 2.46 (1.5 to 3.5)                | 0.43 (0.26 to 0.57)                |
| <b>Sub-Saharan Africa</b>          |                                  |                                    |
| <b>Central Sub-Saharan Africa</b>  |                                  |                                    |
| Angola                             | 6.2 (4.1 to 13.13)               | 1.16 (0.75 to 1.67)                |
| Central African Republic           | 13.49 (6.85 to 20.12)            | 2.78 (1.28 to 4.21)                |
| Congo                              | 8.31 (4.44 to 12.46)             | 2.34 (1.02 to 3.57)                |
| Democratic Republic of the Congo   | 5.24 (3.37 to 7.12)              | 1.32 (0.88 to 1.81)                |
| Equatorial Guinea                  | 5.92 (3.07 to 9.43)              | 1.16 (0.54 to 2.03)                |
| Gabon                              | 8.5 (4.46 to 12.57)              | 1.32 (0.56 to 2.67)                |
| <b>Eastern Sub-Saharan Africa</b>  |                                  |                                    |
| Burundi                            | 0.99 (0.48 to 1.66)              | 0.28 (0.15 to 0.46)                |
| Comoros                            | 12.93 (4.56 to 18.33)            | 4.07 (1.36 to 5.83)                |
| Djibouti                           | 12.77 (4.27 to 19.91)            | 3.6 (1.08 to 5.86)                 |
| Eritrea                            | 22.29 (6.64 to 34.88)            | 5 (1.46 to 7.56)                   |
| Ethiopia                           | 13.78 (11.15 to 19.73)           | 4.92 (3.58 to 6.72)                |
| Kenya                              | 18.35 (13.38 to 25.19)           | 4.92 (3.4 to 6.89)                 |
| Madagascar                         | 2.57 (0.96 to 3.79)              | 0.68 (0.28 to 0.97)                |
| Malawi                             | 3.21 (1.67 to 10.42)             | 0.74 (0.33 to 2.32)                |
| Mozambique                         | 13.43 (8.3 to 17.68)             | 2.46 (1.52 to 3.32)                |
| Rwanda                             | 5.23 (3.51 to 7.25)              | 1.19 (0.79 to 1.76)                |
| Somalia                            | 17.17 (5.67 to 25.97)            | 4.77 (1.5 to 7.47)                 |
| South Sudan                        | 16.41 (5.27 to 25.37)            | 4.3 (1.31 to 6.85)                 |
| Tanzania                           | 9.91 (7.46 to 14.95)             | 2.81 (2.08 to 4.95)                |
| Uganda                             | 7.68 (4.41 to 10.57)             | 1.46 (0.8 to 2.28)                 |
| Zambia                             | 10.14 (6 to 13.68)               | 2.52 (1.52 to 3.89)                |
| <b>Southern Sub-Saharan Africa</b> |                                  |                                    |
| Botswana                           | 12.04 (3.11 to 16.23)            | 3.22 (0.86 to 4.71)                |
| Lesotho                            | 71.54 (28.88 to 96.37)           | 8.93 (3.84 to 13.88)               |
| Namibia                            | 26.72 (17.72 to 37.57)           | 3.81 (2.33 to 5.91)                |
| South Africa                       | 44.54 (32.7 to 50.03)            | 9.2 (6.45 to 12.12)                |
| Swaziland                          | 43.34 (30.02 to 63.92)           | 5.2 (3.25 to 9.22)                 |
| Zimbabwe                           | 14.77 (10.43 to 20.89)           | 2.89 (2.04 to 4.33)                |
| <b>Western Sub-Saharan Africa</b>  |                                  |                                    |
| Benin                              | 10 (5.08 to 13.9)                | 2.44 (1.09 to 3.55)                |
| Burkina Faso                       | 20.98 (15.78 to 27.99)           | 7.15 (5.38 to 10.93)               |
| Cameroon                           | 4.64 (2.63 to 6.48)              | 1.08 (0.63 to 1.56)                |
| Cape Verde                         | 19.81 (15.57 to 25.94)           | 4.42 (2.89 to 5.4)                 |
| Chad                               | 11.68 (5.84 to 16.17)            | 2.98 (1.3 to 4.39)                 |
| Cote d'Ivoire                      | 20.03 (14.97 to 27.24)           | 2.85 (1.28 to 4.39)                |
| The Gambia                         | 2.59 (0.66 to 14.24)             | 0.27 (0.2 to 0.39)                 |
| Ghana                              | 4.9 (2.81 to 15.59)              | 1.58 (0.75 to 5.35)                |



|                       | <b>Estimate in 2017, male (95% UIs)</b> | <b>Estimate in 2017, female (95% UIs)</b> |
|-----------------------|-----------------------------------------|-------------------------------------------|
| Guinea                | 12.69 (6.25 to 16.85)                   | 3.15 (1.39 to 4.2)                        |
| Guinea-Bissau         | 14.67 (7.77 to 20.33)                   | 5.14 (3.45 to 7.42)                       |
| Liberia               | 3.47 (1.68 to 4.73)                     | 1 (0.57 to 1.34)                          |
| Mali                  | 9.16 (4.44 to 16.23)                    | 2.92 (1.3 to 4.32)                        |
| Mauritania            | 7.12 (3.66 to 10.72)                    | 2.02 (0.9 to 2.84)                        |
| Niger                 | 10.19 (5.09 to 17.53)                   | 2.61 (1.16 to 4.27)                       |
| Nigeria               | 6.19 (3.33 to 9.1)                      | 1.79 (0.8 to 2.67)                        |
| Sao Tome and Principe | 7.87 (4.61 to 10.46)                    | 2.54 (1.36 to 3.31)                       |
| Senegal               | 1.76 (1.12 to 2.34)                     | 0.44 (0.29 to 0.61)                       |
| Sierra Leone          | 2.17 (1.13 to 2.99)                     | 0.65 (0.37 to 0.89)                       |
| Togo                  | 10.61 (5.29 to 14.44)                   | 2.23 (0.99 to 3.2)                        |

Supplementary table 3. Unscaled values for the 40 individual health-related SDG indicators in 2000, 2015, 2017, and 2030, and annualised rate of change and projected percent change from 2015 to 2030, by country or territory. Projected estimates for 2030 were produced based on past trends and rates of change observed from 1990 to 2017. Estimates are reported for each country and territory included in this analysis, and ordered by health-related SDG indicator followed by GBD super-region and region. SDG indicator 17.19.2a, population census status within the last 10 years, is not included here as projections were not generated for this indicator. All results from 1990 to 2017 for SDG indicator 17.19.2a can be found in Supplementary Figure 1. SDG—Sustainable Development Goal. For this table, forecasted draws (2018 to 2030) for conflict and disaster mortality were truncated so that any values which fell outside the confidence intervals for any location year were set to the lower or upper bound of that confidence interval. ARC—annualised rate of change; GBD—Global Burden of Disease; UIs—uncertainty intervals.

| Indicator 1.5.1: Death rate due to exposure to forces of nature (per 100,000 population) | Estimate in 2000 (95% UIs) | Estimate in 2015 (95% UIs) | Estimate in 2017 (95% UIs) | Estimate in 2030 (95% UIs) | Annualised rate of change, 2015-2030 (95% UIs) | Percent change, 2015-2030 (95% UIs) |
|------------------------------------------------------------------------------------------|----------------------------|----------------------------|----------------------------|----------------------------|------------------------------------------------|-------------------------------------|
| <b>Central Europe, Eastern Europe, and Central Asia</b>                                  |                            |                            |                            |                            |                                                |                                     |
| <b>Central Asia</b>                                                                      |                            |                            |                            |                            |                                                |                                     |
| Armenia                                                                                  | 0.0 (0.0 to 0.0)           | 0.0 (0.0 to 0.0)           | 0.0 (0.0 to 0.0)           | 0.0 (0.0 to 0.1)           | 12.9 (0.0 to 90.9)                             | 6184077.0 (0.0 to 83038434.9)       |
| Azerbaijan                                                                               | 0.5 (0.5 to 0.5)           | 0.0 (0.0 to 0.0)           | 0.0 (0.0 to 0.0)           | 0.0 (0.0 to 0.3)           | 12.8 (0.0 to 98.6)                             | 11103613.0 (0.0 to 264422474.3)     |
| Georgia                                                                                  | 0.0 (0.0 to 0.0)           | 0.2 (0.1 to 0.2)           | 0.0 (0.0 to 0.0)           | 0.0 (0.0 to 0.0)           | -72.0 (-95.6 to 4.2)                           | -86.1 (-100.0 to 87.2)              |
| Kazakhstan                                                                               | 0.0 (0.0 to 0.0)           | 0.0 (0.0 to 0.0)           | 0.0 (0.0 to 0.0)           | 0.0 (0.0 to 0.0)           | -64.5 (-84.1 to 1.1)                           | -81.1 (-100.0 to 17.5)              |
| Kyrgyzstan                                                                               | 0.2 (0.1 to 0.2)           | 0.3 (0.3 to 0.3)           | 0.4 (0.4 to 0.4)           | 0.1 (0.0 to 1.1)           | -67.8 (-99.2 to 9.4)                           | -59.6 (-100.0 to 307.5)             |
| Mongolia                                                                                 | 0.0 (0.9 to 1.0)           | 0.0 (0.0 to 0.0)           | 0.5 (0.5 to 0.5)           | 0.2 (0.0 to 3.2)           | 25.5 (0.0 to 115.2)                            | 204599526.5 (0.0 to 3214076228.1)   |
| Tajikistan                                                                               | 0.0 (0.0 to 0.0)           | 0.0 (0.0 to 0.0)           | 0.1 (0.1 to 0.1)           | 0.2 (0.0 to 3.9)           | -55.9 (-82.4 to 34.2)                          | 697.1 (-100.0 to 16814.1)           |
| Turkmenistan                                                                             | 0.0 (0.0 to 0.0)           | 0.0 (0.0 to 0.0)           | 0.0 (0.0 to 0.0)           | 0.0 (0.0 to 0.0)           | 19.4 (0.0 to 78.4)                             | 2561547.8 (0.0 to 12755187.1)       |
| Uzbekistan                                                                               | 0.0 (0.0 to 0.0)           | 0.0 (0.0 to 0.0)           | 0.0 (0.0 to 0.0)           | 0.0 (0.0 to 0.0)           | 9.5 (0.0 to 83.4)                              | 1872259.4 (0.0 to 27239320.3)       |
| <b>Central Europe</b>                                                                    |                            |                            |                            |                            |                                                |                                     |
| Albania                                                                                  | 0.0 (0.0 to 0.0)           | 0.0 (0.0 to 0.0)           | 0.0 (0.0 to 0.0)           | 0.1 (0.0 to 1.0)           | -61.1 (-85.4 to 22.0)                          | 58.8 (-100.0 to 2628.4)             |
| Bosnia and Herzegovina                                                                   | 0.1 (0.1 to 0.1)           | 0.0 (0.0 to 0.0)           | 0.0 (0.0 to 0.0)           | 0.0 (0.0 to 0.1)           | 6.6 (0.0 to 92.6)                              | 6560902.3 (0.0 to 107705166.5)      |
| Bulgaria                                                                                 | 0.1 (0.1 to 0.1)           | 0.1 (0.1 to 0.1)           | 0.0 (0.0 to 0.0)           | 0.0 (0.0 to 0.1)           | -56.0 (-89.8 to 3.8)                           | -75.9 (-100.0 to 77.6)              |
| Croatia                                                                                  | 0.0 (0.0 to 0.0)           | 0.0 (0.0 to 0.0)           | 0.0 (0.0 to 0.0)           | 0.0 (0.0 to 0.0)           | -66.1 (-83.1 to 3.9)                           | 779.3 (-100.0 to 79.3)              |
| Czech Republic                                                                           | 0.0 (0.0 to 0.0)           | 0.0 (0.0 to 0.0)           | 0.0 (0.0 to 0.0)           | 0.0 (0.0 to 0.1)           | 21.3 (0.0 to 91.3)                             | 10350972.2 (0.0 to 88323334.9)      |
| Hungary                                                                                  | 0.0 (0.0 to 0.0)           | 0.0 (0.0 to 0.0)           | 0.0 (0.0 to 0.0)           | 0.0 (0.0 to 0.1)           | 15.2 (0.0 to 88.7)                             | 8526253.5 (0.0 to 59698705.2)       |
| Macedonia                                                                                | 0.0 (0.0 to 0.0)           | 0.3 (0.3 to 0.3)           | 0.0 (0.0 to 0.0)           | 0.1 (0.0 to 0.7)           | -80.6 (-100.1 to 5.4)                          | -85.9 (-100.0 to 123.4)             |
| Montenegro                                                                               | 0.0 (0.0 to 0.0)           | 0.0 (0.0 to 0.0)           | 0.0 (0.0 to 0.0)           | 0.0 (0.0 to 0.2)           | 3.7 (0.0 to 95.7)                              | 5821493.4 (0.0 to 170717220.4)      |
| Poland                                                                                   | 0.0 (0.0 to 0.0)           | 0.0 (0.0 to 0.0)           | 0.0 (0.0 to 0.0)           | 0.0 (0.0 to 0.0)           | -53.9 (-78.9 to 4.9)                           | -66.3 (-100.0 to 109.9)             |
| Romania                                                                                  | 0.1 (0.1 to 0.1)           | 0.0 (0.0 to 0.0)           | 0.1 (0.1 to 0.1)           | 0.0 (0.0 to 0.3)           | -36.7 (-72.3 to 28.2)                          | 434.1 (-100.0 to 6823.6)            |
| Serbia                                                                                   | 0.1 (0.1 to 0.1)           | 0.0 (0.0 to 0.0)           | 0.0 (0.0 to 0.0)           | 0.0 (0.0 to 0.1)           | -63.7 (-82.6 to 5.9)                           | -70.6 (-100.0 to 141.1)             |
| Slovakia                                                                                 | 0.0 (0.0 to 0.0)           | 0.0 (0.0 to 0.0)           | 0.0 (0.0 to 0.0)           | 0.0 (0.0 to 0.2)           | 21.7 (0.0 to 96.3)                             | 14350002.8 (0.0 to 188075553.8)     |
| Slovenia                                                                                 | 0.0 (0.0 to 0.0)           | 0.1 (0.0 to 0.1)           | 0.0 (0.0 to 0.0)           | 0.0 (0.0 to 0.2)           | -58.0 (-87.9 to 7.8)                           | -47.2 (-100.0 to 224.2)             |
| <b>Eastern Europe</b>                                                                    |                            |                            |                            |                            |                                                |                                     |
| Belarus                                                                                  | 0.0 (0.0 to 0.0)           | 0.0 (0.0 to 0.0)           | 0.0 (0.0 to 0.0)           | 0.0 (0.0 to 0.0)           | 15.2 (0.0 to 86.0)                             | 5104087.0 (0.0 to 39845863.3)       |
| Estonia                                                                                  | 0.1 (0.1 to 0.1)           | 0.0 (0.0 to 0.0)           | 0.0 (0.0 to 0.0)           | 0.0 (0.0 to 0.1)           | 9.1 (0.0 to 89.9)                              | 6123575.4 (0.0 to 71942181.1)       |
| Latvia                                                                                   | 0.0 (0.0 to 0.0)           | 0.0 (0.0 to 0.0)           | 0.0 (0.0 to 0.0)           | 0.0 (0.0 to 0.1)           | 5.8 (0.0 to 89.1)                              | 3516437.0 (0.0 to 64131484.5)       |
| Lithuania                                                                                | 0.0 (0.0 to 0.0)           | 0.0 (0.0 to 0.0)           | 0.0 (0.0 to 0.0)           | 0.0 (0.0 to 0.1)           | 12.1 (0.0 to 88.0)                             | 5701093.7 (0.0 to 54249739.7)       |
| Moldova                                                                                  | 0.0 (0.0 to 0.0)           | 0.0 (0.0 to 0.0)           | 0.0 (0.0 to 0.0)           | 0.0 (0.0 to 0.1)           | 10.8 (0.0 to 94.5)                             | 6820378.8 (0.0 to 144192616.0)      |
| Russia                                                                                   | 0.1 (0.1 to 0.1)           | 0.1 (0.1 to 0.1)           | 0.0 (0.0 to 0.0)           | 0.0 (0.0 to 0.2)           | -49.5 (-89.0 to 9.3)                           | -43.7 (-100.0 to 301.4)             |
| Ukraine                                                                                  | 0.0 (0.0 to 0.0)           | 0.0 (0.0 to 0.0)           | 0.0 (0.0 to 0.0)           | 0.0 (0.0 to 0.1)           | -66.9 (-82.2 to 6.7)                           | -82.2 (-100.0 to 174.0)             |
| <b>High-income</b>                                                                       |                            |                            |                            |                            |                                                |                                     |
| <b>Australasia</b>                                                                       |                            |                            |                            |                            |                                                |                                     |
| Australia                                                                                | 0.0 (0.0 to 0.0)           | 0.0 (0.0 to 0.0)           | 0.1 (0.1 to 0.1)           | 0.0 (0.0 to 0.3)           | -28.8 (-86.0 to 13.6)                          | 16.2 (-100.0 to 663.4)              |
| New Zealand                                                                              | 0.1 (0.1 to 0.1)           | 0.1 (0.1 to 0.1)           | 0.0 (0.0 to 0.0)           | 1.9 (0.0 to 38.2)          | -41.3 (-93.3 to 38.5)                          | 1599.4 (-100.0 to 32196.4)          |
| <b>High-income Asia Pacific</b>                                                          |                            |                            |                            |                            |                                                |                                     |
| Bhutan                                                                                   | 0.0 (0.0 to 0.0)           | 0.7 (0.5 to 1.0)           | 0.0 (0.0 to 0.0)           | 0.0 (0.0 to 0.0)           | -105.1 (-107.5 to -102.8)                      | -100.0 (-100.0 to -100.0)           |
| Japan                                                                                    | 0.0 (0.0 to 0.0)           | 0.0 (0.0 to 0.0)           | 0.0 (0.0 to 0.0)           | 0.6 (0.0 to 6.0)           | 12.3 (-2.2 to 37.0)                            | 2424.7 (-28.2 to 25749.3)           |
| South Korea                                                                              | 0.1 (0.1 to 0.2)           | 0.0 (0.0 to 0.0)           | 0.0 (0.0 to 0.0)           | 0.4 (0.0 to 2.2)           | 13.0 (-67.4 to 47.0)                           | 20629.8 (-100.0 to 115553.2)        |
| Singapore                                                                                | 0.0 (0.0 to 0.0)           | 0.0 (0.0 to 0.0)           | 0.0 (0.0 to 0.0)           | 0.0 (0.0 to 0.0)           | 3.5 (0.0 to 79.5)                              | 663495.3 (0.0 to 15018461.6)        |
| <b>High-income North America</b>                                                         |                            |                            |                            |                            |                                                |                                     |
| Canada                                                                                   | 0.1 (0.0 to 0.1)           | 0.0 (0.0 to 0.0)           | 0.0 (0.0 to 0.0)           | 0.0 (0.0 to 0.2)           | 50.9 (0.0 to 96.2)                             | 33628572.6 (0.0 to 184970766.7)     |
| Greenland                                                                                | 0.0 (0.0 to 0.0)           | 0.0 (0.0 to 0.0)           | 0.0 (0.0 to 0.0)           | 0.0 (0.0 to 1.1)           | 4.0 (0.0 to 107.8)                             | 38945077.8 (0.0 to 1052602059.5)    |
| United States                                                                            | 0.1 (0.1 to 0.1)           | 0.1 (0.1 to 0.1)           | 0.0 (0.0 to 0.0)           | 0.1 (0.0 to 0.4)           | 0.3 (-8.4 to 9.7)                              | 29.1 (-71.7 to 330.8)               |
| <b>Southern Latin America</b>                                                            |                            |                            |                            |                            |                                                |                                     |
| Argentina                                                                                | 0.1 (0.1 to 0.1)           | 0.0 (0.0 to 0.0)           | 0.0 (0.0 to 0.0)           | 0.0 (0.0 to 0.3)           | -32.6 (-86.0 to 12.8)                          | 3.6 (-100.0 to 583.6)               |
| Chile                                                                                    | 0.1 (0.1 to 0.1)           | 1.3 (1.2 to 1.3)           | 0.2 (0.1 to 0.2)           | 0.6 (0.0 to 10.6)          | -51.8 (-109.1 to 14.2)                         | -52.5 (-100.0 to 742.9)             |
| Uruguay                                                                                  | 0.0 (0.0 to 0.0)           | 0.1 (0.1 to 0.1)           | 0.0 (0.0 to 0.0)           | 0.0 (0.0 to 0.0)           | -73.2 (-89.0 to -2.8)                          | -91.1 (-100.0 to -34.2)             |
| <b>Western Europe</b>                                                                    |                            |                            |                            |                            |                                                |                                     |
| Andorra                                                                                  | 0.0 (0.0 to 0.0)           | 0.0 (0.0 to 0.0)           | 0.0 (0.0 to 0.0)           | 0.0 (0.0 to 0.0)           | 0.0 (0.0 to 0.0)                               | 0.0 (0.0 to 0.0)                    |
| Austria                                                                                  | 0.2 (0.2 to 0.2)           | 0.2 (0.2 to 0.2)           | 0.0 (0.0 to 0.0)           | 0.1 (0.0 to 0.6)           | -47.7 (-97.8 to 6.8)                           | -56.4 (-100.0 to 175.5)             |
| Belgium                                                                                  | 0.0 (0.0 to 0.0)           | 0.0 (0.0 to 0.0)           | 0.0 (0.0 to 0.0)           | 0.0 (0.0 to 0.1)           | 18.1 (0.0 to 93.2)                             | 7832766.1 (0.0 to 118412882.4)      |
| Cyprus                                                                                   | 0.0 (0.0 to 0.0)           | 0.0 (0.0 to 0.0)           | 0.0 (0.0 to 0.0)           | 0.0 (0.0 to 0.5)           | 6.5 (0.0 to 102.3)                             | 18759399.9 (0.0 to 467419236.9)     |
| Denmark                                                                                  | 0.0 (0.0 to 0.0)           | 0.0 (0.0 to 0.0)           | 0.0 (0.0 to 0.0)           | 0.0 (0.0 to 0.0)           | 9.8 (0.0 to 85.6)                              | 3429491.3 (0.0 to 37782905.5)       |
| Finland                                                                                  | 0.1 (0.0 to 0.1)           | 0.0 (0.0 to 0.0)           | 0.0 (0.0 to 0.0)           | 0.0 (0.0 to 0.0)           | 13.9 (0.0 to 84.9)                             | 4204091.3 (0.0 to 34133115.6)       |
| France                                                                                   | 0.0 (0.0 to 0.0)           | 0.0 (0.0 to 0.0)           | 0.0 (0.0 to 0.0)           | 0.0 (0.0 to 0.1)           | -22.2 (-85.4 to 6.8)                           | 123.8 (-100.0 to 175.3)             |
| Germany                                                                                  | 0.0 (0.0 to 0.0)           | 0.0 (0.0 to 0.0)           | 0.0 (0.0 to 0.0)           | 0.0 (0.0 to 0.1)           | -43.6 (-76.7 to 14.1)                          | -23.7 (-100.0 to 733.4)             |
| Greece                                                                                   | 0.0 (0.0 to 0.0)           | 0.1 (0.1 to 0.1)           | 0.2 (0.2 to 0.2)           | 0.1 (0.0 to 0.7)           | -38.6 (-90.3 to 15.8)                          | 45.1 (-100.0 to 970.1)              |
| Iceland                                                                                  | 0.0 (0.0 to 0.0)           | 0.0 (0.0 to 0.0)           | 0.3 (0.2 to 0.4)           | 14.2 (0.0 to 110.5)        | 96.401644.0 (0.0 to 1575939293.2)              |                                     |
| Ireland                                                                                  | 0.0 (0.0 to 0.0)           | 0.0 (0.0 to 0.0)           | 0.0 (0.0 to 0.0)           | 0.0 (0.0 to 0.1)           | -64.7 (-82.1 to 8.8)                           | -59.0 (-100.0 to 272.7)             |
| Israel                                                                                   | 0.1 (0.0 to 0.1)           | 0.0 (0.0 to 0.0)           | 0.0 (0.0 to 0.0)           | 0.0 (0.0 to 0.1)           | 11.5 (0.0 to 91.2)                             | 6700905.3 (0.0 to 87663967.2)       |
| Italy                                                                                    | 0.1 (0.1 to 0.1)           | 0.1 (0.1 to 0.1)           | 0.1 (0.1 to 0.1)           | 0.3 (0.0 to 4.0)           | -15.0 (-89.3 to 27.6)                          | 325.0 (-100.0 to 6190.7)            |
| Luxembourg                                                                               | 0.5 (0.3 to 0.6)           | 0.0 (0.0 to 0.0)           | 0.0 (0.0 to 0.0)           | 0.0 (0.0 to 0.2)           | 3.4 (0.0 to 97.7)                              | 8064073.5 (0.0 to 230402861.2)      |
| Malta                                                                                    | 0.0 (0.0 to 0.0)           | 0.0 (0.0 to 0.0)           | 0.0 (0.0 to 0.0)           | 0.0 (0.0 to 0.0)           | 0.0 (0.0 to 0.0)                               | 0.0 (0.0 to 0.0)                    |
| Netherlands                                                                              | 0.0 (0.0 to 0.0)           | 0.0 (0.0 to 0.0)           | 0.0 (0.0 to 0.0)           | 0.0 (0.0 to 0.1)           | -54.5 (-75.8 to 15.0)                          | 2.3 (-100.0 to 845.3)               |
| Norway                                                                                   | 0.0 (0.0 to 0.1)           | 0.1 (0.1 to 0.1)           | 0.0 (0.0 to 0.0)           | 0.1 (0.0 to 0.2)           | -52.5 (-94.5 to 3.5)                           | -63.5 (-100.0 to 69.8)              |
| Portugal                                                                                 | 0.0 (0.0 to 0.0)           | 0.0 (0.0 to 0.0)           | 0.0 (0.0 to 0.0)           | 0.0 (0.0 to 0.6)           | -44.8 (-76.7 to 27.8)                          | 342.1 (-100.0 to 6405.9)            |
| Spain                                                                                    | 0.0 (0.0 to 0.0)           | 0.0 (0.0 to 0.0)           | 0.0 (0.0 to 0.0)           | 0.1 (0.0 to 1.4)           | -25.0 (-79.7 to 30.8)                          | 486.3 (-100.0 to 10099.2)           |
| Sweden                                                                                   | 0.0 (0.0 to 0.0)           | 0.0 (0.0 to 0.0)           | 0.0 (0.0 to 0.0)           | 0.0 (0.0 to 0.1)           | 31.8 (0.0 to 93.2)                             | 13836815.6 (0.0 to 118120061.8)     |
| Switzerland                                                                              | 0.4 (0.3 to 0.5)           | 0.2 (0.2 to 0.3)           | 0.0 (0.0 to 0.0)           | 0.1 (0.0 to 1.6)           | -52.7 (-98.3 to 12.7)                          | -36.6 (-100.0 to 574.0)             |
| United Kingdom                                                                           | 0.0 (0.0 to 0.0)           | 0.0 (0.0 to 0.0)           | 0.0 (0.0 to 0.0)           | 0.0 (0.0 to 0.1)           | -29.1 (-74.0 to 20.0)                          | 133.7 (-100.0 to 1898.7)            |
| <b>Latin America and Caribbean</b>                                                       |                            |                            |                            |                            |                                                |                                     |

|                                               | Estimate in 2000 (95% UIs) | Estimate in 2015 (95% UIs) | Estimate in 2017 (95% UIs) | Estimate in 2030 (95% UIs) | Annualised rate of change, 2015-2030 (95% UIs) | Percent change, 2015-2030 (95% UIs) |
|-----------------------------------------------|----------------------------|----------------------------|----------------------------|----------------------------|------------------------------------------------|-------------------------------------|
| <b>Andean Latin America</b>                   |                            |                            |                            |                            |                                                |                                     |
| Bolivia                                       | 0.0 (0.0 to 0.0)           | 0.2 (0.2 to 0.2)           | 0.0 (0.0 to 0.0)           | 0.2 (0.0 to 0.9)           | -50.9 (-96.3 to 10.6)                          | 0.8 (-100.0 to 391.5)               |
| Ecuador                                       | 0.6 (0.6 to 0.7)           | 0.2 (0.2 to 0.2)           | 0.0 (0.0 to 0.0)           | 0.3 (0.0 to 3.1)           | -43.5 (-97.9 to 11.5)                          | 42.0 (-100.0 to 1279.9)             |
| Peru                                          | 0.1 (0.1 to 0.2)           | 0.1 (0.1 to 0.1)           | 0.3 (0.3 to 0.3)           | 0.8 (0.0 to 13.4)          | -16.3 (-93.1 to 31.9)                          | 615.1 (-100.0 to 11840.2)           |
| <b>Caribbean</b>                              |                            |                            |                            |                            |                                                |                                     |
| Antigua and Barbuda                           | 0.0 (0.0 to 0.0)           | 0.0 (0.0 to 0.0)           | 1.1 (1.0 to 1.3)           | 0.2 (0.0 to 2.6)           | 7.8 (0.0 to 113.8)                             | 164870544.3 (0.0 to 2605383142.6)   |
| The Bahamas                                   | 0.0 (0.0 to 0.0)           | 8.9 (7.6 to 10.4)          | 0.0 (0.0 to 0.0)           | 0.2 (0.0 to 3.3)           | -105.7 (-123.1 to -7.0)                        | -97.9 (-100.0 to -65.3)             |
| Barbados                                      | 0.0 (0.0 to 0.0)           | 0.0 (0.0 to 0.0)           | 0.0 (0.0 to 0.0)           | 0.0 (0.0 to 0.5)           | 5.6 (0.0 to 103.3)                             | 27189642.7 (0.0 to 539240500.1)     |
| Belize                                        | 5.8 (4.9 to 6.9)           | 0.0 (0.0 to 0.0)           | 0.0 (0.0 to 0.0)           | 0.5 (0.0 to 9.3)           | 14.0 (0.0 to 122.3)                            | 532193983.6 (0.0 to 9259541152.5)   |
| Bermuda                                       | 3.2 (1.8 to 5.2)           | 0.0 (0.0 to 0.0)           | 0.0 (0.0 to 0.0)           | 0.0 (0.0 to 2.7)           | 4.7 (0.0 to 114.0)                             | 108941666.7 (0.0 to 2657244774.6)   |
| Cuba                                          | 0.0 (0.0 to 0.0)           | 0.0 (0.0 to 0.0)           | 0.1 (0.1 to 0.1)           | 0.0 (0.0 to 0.3)           | -40.7 (-85.9 to 16.3)                          | 46.3 (-100.0 to 1046.1)             |
| Dominica                                      | 0.0 (0.0 to 0.0)           | 8.7 (5.8 to 12.5)          | 0.0 (0.0 to 0.0)           | 0.4 (0.0 to 5.3)           | -107.8 (-124.3 to -4.1)                        | -95.3 (-100.0 to -46.0)             |
| Dominican Republic                            | 0.0 (0.0 to 0.1)           | 0.0 (0.0 to 0.0)           | 0.0 (0.0 to 0.0)           | 0.4 (0.0 to 8.2)           | -34.2 (-82.0 to 39.9)                          | 2089.7 (-100.0 to 39699.9)          |
| Grenada                                       | 0.0 (0.0 to 0.0)           | 0.0 (0.0 to 0.0)           | 0.0 (0.0 to 0.0)           | 0.2 (0.0 to 5.2)           | 5.4 (0.0 to 118.4)                             | 164770230.4 (0.0 to 5175548899.0)   |
| Guyana                                        | 0.0 (0.0 to 0.0)           | 0.0 (0.0 to 0.0)           | 0.0 (0.0 to 0.0)           | 0.0 (0.0 to 0.0)           | 0.0 (0.0 to 0.0)                               | 0.0 (0.0 to 0.0)                    |
| Haiti                                         | 0.2 (0.2 to 0.2)           | 0.1 (0.1 to 0.1)           | 0.3 (0.2 to 0.3)           | 3.9 (0.0 to 108.1)         | -36.1 (-92.8 to 46.0)                          | 4009.6 (-100.0 to 99611.2)          |
| Jamaica                                       | 0.0 (0.0 to 0.1)           | 0.0 (0.0 to 0.0)           | 0.0 (0.0 to 0.0)           | 0.2 (0.0 to 1.9)           | 33.1 (0.0 to 111.7)                            | 160927323.4 (0.0 to 1902446198.2)   |
| Puerto Rico                                   | 0.1 (0.1 to 0.1)           | 0.0 (0.0 to 0.0)           | 64.2 (40.2 to 100.6)       | 0.1 (0.0 to 2.1)           | 21.8 (0.0 to 112.5)                            | 103657260.4 (0.0 to 2131977504.3)   |
| Saint Lucia                                   | 0.0 (0.0 to 0.0)           | 0.0 (0.0 to 0.0)           | 0.0 (0.0 to 0.0)           | 0.0 (0.0 to 6.2)           | 11.6 (0.0 to 119.6)                            | 287343138.5 (0.0 to 6196988461.1)   |
| Saint Vincent and the Grenadines              | 0.0 (0.0 to 0.0)           | 0.0 (0.0 to 0.0)           | 0.0 (0.0 to 0.0)           | 0.5 (0.0 to 8.0)           | 14.5 (0.0 to 121.3)                            | 476303072.1 (0.0 to 7948452573.0)   |
| Suriname                                      | 0.0 (0.0 to 0.0)           | 0.0 (0.0 to 0.0)           | 0.0 (0.0 to 0.0)           | 0.0 (0.0 to 0.3)           | 4.3 (0.0 to 99.6)                              | 122009555.6 (0.0 to 30641276.3)     |
| Trinidad and Tobago                           | 0.0 (0.0 to 0.0)           | 0.0 (0.0 to 0.0)           | 0.0 (0.0 to 0.0)           | 0.0 (0.0 to 0.4)           | 12.0 (0.0 to 101.6)                            | 28703487.3 (0.0 to 41332323.8)      |
| Virgin Islands, U.S.                          | 0.0 (0.0 to 0.0)           | 0.0 (0.0 to 0.0)           | 4.8 (4.1 to 5.5)           | 0.0 (0.0 to 0.8)           | 5.3 (0.0 to 106.3)                             | 40901478.4 (0.0 to 846029468.7)     |
| <b>Central Latin America</b>                  |                            |                            |                            |                            |                                                |                                     |
| Colombia                                      | 0.5 (0.5 to 0.6)           | 0.3 (0.3 to 0.4)           | 0.7 (0.6 to 0.8)           | 0.4 (0.0 to 2.7)           | -23.7 (-100.9 to 13.3)                         | 18.0 (-100.0 to 639.7)              |
| Costa Rica                                    | 0.1 (0.0 to 0.1)           | 0.0 (0.0 to 0.0)           | 0.4 (0.4 to 0.4)           | 0.2 (0.0 to 1.2)           | 44.5 (0.0 to 108.7)                            | 157745419.5 (0.0 to 1204602929.4)   |
| El Salvador                                   | 0.1 (0.1 to 0.2)           | 0.2 (0.2 to 0.2)           | 0.0 (0.0 to 0.0)           | 0.9 (0.0 to 15.8)          | -51.9 (-97.7 to 28.2)                          | 325.0 (-100.0 to 6771.3)            |
| Guatemala                                     | 0.4 (0.3 to 0.4)           | 0.0 (0.0 to 0.1)           | 0.1 (0.1 to 0.1)           | 0.4 (0.0 to 7.2)           | -43.6 (-87.4 to 33.5)                          | 787.9 (-100.0 to 15059.3)           |
| Honduras                                      | 0.0 (0.0 to 0.0)           | 0.0 (0.0 to 0.0)           | 0.1 (0.1 to 0.1)           | 6.2 (0.0 to 178.5)         | 44.4 (0.0 to 142.0)                            | 6254968364.8 (0.0 to 17845545484.2) |
| Mexico                                        | 0.1 (0.1 to 0.1)           | 0.1 (0.1 to 0.1)           | 0.4 (0.4 to 0.4)           | 0.4 (0.0 to 4.6)           | -5.9 (-87.7 to 29.8)                           | 446.2 (-100.0 to 8613.5)            |
| Nicaragua                                     | 0.2 (0.2 to 0.2)           | 0.1 (0.0 to 0.1)           | 0.2 (0.2 to 0.2)           | 1.5 (0.0 to 31.6)          | -42.4 (-88.2 to 42.8)                          | 3045.5 (-100.0 to 61712.7)          |
| Panama                                        | 0.1 (0.1 to 0.1)           | 0.0 (0.0 to 0.0)           | 0.0 (0.0 to 0.0)           | 0.1 (0.0 to 0.9)           | -44.4 (-85.7 to 23.5)                          | 274.8 (-100.0 to 3279.1)            |
| Venezuela                                     | 0.1 (0.1 to 0.1)           | 0.0 (0.0 to 0.0)           | 0.0 (0.0 to 0.0)           | 0.1 (0.0 to 2.1)           | 41.7 (0.0 to 112.4)                            | 132252387.6 (0.0 to 210650556.1)    |
| <b>Tropical Latin America</b>                 |                            |                            |                            |                            |                                                |                                     |
| Brazil                                        | 0.1 (0.0 to 0.1)           | 0.0 (0.0 to 0.1)           | 0.0 (0.0 to 0.0)           | 0.0 (0.0 to 0.9)           | -15.1 (-86.5 to 21.1)                          | 156.0 (-100.0 to 2275.9)            |
| Paraguay                                      | 0.0 (0.0 to 0.0)           | 0.1 (0.1 to 0.2)           | 0.0 (0.0 to 0.0)           | 0.0 (0.0 to 0.4)           | -65.0 (-95.2 to 8.3)                           | -74.5 (-100.0 to 248.0)             |
| <b>North Africa and Middle East</b>           |                            |                            |                            |                            |                                                |                                     |
| <b>North Africa and Middle East</b>           |                            |                            |                            |                            |                                                |                                     |
| Afghanistan                                   | 0.0 (0.0 to 0.0)           | 0.6 (0.5 to 0.8)           | 0.5 (0.4 to 0.6)           | 1.1 (0.0 to 15.2)          | -45.3 (-105.2 to 20.5)                         | 75.5 (-100.0 to 2074.0)             |
| Algeria                                       | 0.1 (0.1 to 0.2)           | 0.0 (0.0 to 0.0)           | 0.0 (0.0 to 0.0)           | 0.4 (0.0 to 7.6)           | -33.4 (-85.0 to 36.2)                          | 1079.2 (-100.0 to 22857.1)          |
| Bahrain                                       | 0.0 (0.0 to 0.0)           | 0.0 (0.0 to 0.0)           | 0.0 (0.0 to 0.0)           | 0.0 (0.0 to 0.0)           | 0.0 (0.0 to 0.0)                               | 0.0 (0.0 to 0.0)                    |
| Egypt                                         | 0.0 (0.0 to 0.0)           | 0.0 (0.0 to 0.1)           | 0.0 (0.0 to 0.0)           | 0.0 (0.0 to 0.6)           | -52.5 (-87.7 to 16.6)                          | -239.6 (-100.0 to 1103.5)           |
| Iran                                          | 0.0 (0.0 to 0.0)           | 0.1 (0.1 to 0.1)           | 1.0 (0.9 to 1.2)           | 4.7 (0.0 to 52.1)          | -9.7 (-90.7 to 43.4)                           | 5921.2 (-100.0 to 66696.7)          |
| Iraq                                          | 0.0 (0.0 to 0.0)           | 0.1 (0.1 to 0.2)           | 0.0 (0.0 to 0.1)           | 0.0 (0.0 to 0.1)           | -83.6 (-95.5 to -6.0)                          | -97.5 (-100.0 to -59.6)             |
| Jordan                                        | 0.2 (0.1 to 0.2)           | 0.0 (0.0 to 0.0)           | 0.0 (0.0 to 0.0)           | 0.1 (0.0 to 1.7)           | 14.9 (0.0 to 111.1)                            | 71101656.1 (0.0 to 1716127734.5)    |
| Kuwait                                        | 0.0 (0.0 to 0.0)           | 0.0 (0.0 to 0.0)           | 0.0 (0.0 to 0.0)           | 0.0 (0.0 to 0.0)           | 0.0 (0.0 to 0.0)                               | 0.0 (0.0 to 0.0)                    |
| Lebanon                                       | 0.0 (0.0 to 0.0)           | 0.1 (0.1 to 0.1)           | 0.0 (0.0 to 0.0)           | 0.0 (0.0 to 0.3)           | -83.9 (-89.9 to 10.0)                          | -83.3 (-100.0 to 345.3)             |
| Libya                                         | 0.0 (0.0 to 0.0)           | 0.0 (0.0 to 0.0)           | 0.0 (0.0 to 0.0)           | 0.0 (0.0 to 0.2)           | 3.5 (0.0 to 97.5)                              | 8032945.4 (0.0 to 22137384.1)       |
| Morocco                                       | 0.0 (0.0 to 0.0)           | 0.0 (0.0 to 0.0)           | 0.0 (0.0 to 0.0)           | 0.1 (0.0 to 1.3)           | 35.8 (0.0 to 109.3)                            | 105317226.5 (0.0 to 131559532.2)    |
| Palestine                                     | 0.0 (0.0 to 0.0)           | 0.1 (0.1 to 0.1)           | 0.0 (0.0 to 0.0)           | 0.0 (0.0 to 0.1)           | -87.9 (-92.2 to -3.5)                          | -97.8 (-100.0 to -40.4)             |
| Oman                                          | 0.0 (0.0 to 0.0)           | 0.0 (0.0 to 0.0)           | 0.0 (0.0 to 0.0)           | 0.1 (0.0 to 1.2)           | 11.5 (0.0 to 108.7)                            | 60764565.9 (0.0 to 1212808650.1)    |
| Qatar                                         | 0.0 (0.0 to 0.0)           | 0.0 (0.0 to 0.0)           | 0.0 (0.0 to 0.0)           | 0.0 (0.0 to 0.0)           | 0.0 (0.0 to 0.0)                               | 0.0 (0.0 to 0.0)                    |
| Saudi Arabia                                  | 0.0 (0.0 to 0.0)           | 0.1 (0.1 to 0.1)           | 0.0 (0.0 to 0.0)           | 0.0 (0.0 to 0.2)           | -68.9 (-90.9 to 8.1)                           | -68.2 (-100.0 to 236.9)             |
| Sudan                                         | 0.0 (0.0 to 0.0)           | 0.1 (0.0 to 0.1)           | 0.0 (0.0 to 0.0)           | 0.0 (0.0 to 0.3)           | -55.2 (-88.8 to 10.7)                          | -33.4 (-100.0 to 400.4)             |
| Syria                                         | 0.0 (0.0 to 0.0)           | 0.1 (0.1 to 0.1)           | 0.0 (0.0 to 0.0)           | 0.0 (0.0 to 0.3)           | -82.2 (-91.0 to 8.7)                           | -85.3 (-100.0 to 269.5)             |
| Tunisia                                       | 0.0 (0.0 to 0.0)           | 0.0 (0.0 to 0.0)           | 0.0 (0.0 to 0.0)           | 0.1 (0.0 to 1.1)           | 17.8 (0.0 to 108.4)                            | 81227761.2 (0.0 to 1147369144.1)    |
| Turkey                                        | 0.0 (0.0 to 0.0)           | 0.0 (0.0 to 0.0)           | 0.4 (0.0 to 5.3)           | 4.4 (0.0 to 5.3)           | -18.8 (-83.2 to 35.9)                          | 1628.7 (-100.0 to 21614.7)          |
| United Arab Emirates                          | 0.0 (0.0 to 0.0)           | 0.0 (0.0 to 0.0)           | 0.0 (0.0 to 0.0)           | 0.0 (0.0 to 0.0)           | 0.0 (0.0 to 0.0)                               | 0.0 (0.0 to 0.0)                    |
| Yemen                                         | 0.0 (0.0 to 0.0)           | 0.1 (0.1 to 0.1)           | 0.2 (0.0 to 1.2)           | 0.1 (0.0 to 1.5)           | -62.0 (-93.8 to 16.4)                          | -12.7 (-100.0 to 1076.7)            |
| <b>South Asia</b>                             |                            |                            |                            |                            |                                                |                                     |
| <b>South Asia</b>                             |                            |                            |                            |                            |                                                |                                     |
| Bangladesh                                    | 0.1 (0.1 to 0.1)           | 0.1 (0.1 to 0.1)           | 0.1 (0.1 to 0.1)           | 4.7 (0.0 to 57.2)          | -7.5 (-92.4 to 42.1)                           | 4506.1 (-100.0 to 55330.6)          |
| Bhutan                                        | 33.2 (31.8 to 34.4)        | 0.0 (0.0 to 0.0)           | 0.0 (0.0 to 0.0)           | 0.2 (0.0 to 4.3)           | 8.7 (0.0 to 117.2)                             | 21653730.4 (0.0 to 434377296.7)     |
| India                                         | 0.2 (0.2 to 0.2)           | 0.1 (0.1 to 0.1)           | 0.1 (0.1 to 0.1)           | 0.2 (0.0 to 1.0)           | -4.9 (-90.9 to 16.7)                           | 90.9 (-100.0 to 1115.4)             |
| Nepal                                         | 0.6 (0.6 to 0.6)           | 30.8 (29.6 to 32.0)        | 0.5 (0.5 to 0.5)           | 0.6 (0.0 to 4.2)           | -63.2 (-130.5 to -13.3)                        | -98.1 (-100.0 to -86.4)             |
| Pakistan                                      | 0.0 (0.0 to 0.0)           | 0.3 (0.3 to 0.3)           | 0.0 (0.0 to 0.0)           | 0.8 (0.0 to 12.8)          | -28.2 (-100.1 to 24.4)                         | 159.6 (-100.0 to 3809.4)            |
| <b>Southeast Asia, East Asia, and Oceania</b> |                            |                            |                            |                            |                                                |                                     |
| <b>East Asia</b>                              |                            |                            |                            |                            |                                                |                                     |
| China                                         | 0.0 (0.0 to 0.0)           | 0.0 (0.0 to 0.0)           | 0.0 (0.0 to 0.0)           | 0.3 (0.0 to 3.7)           | -5.4 (-85.2 to 31.0)                           | 735.0 (-100.0 to 10299.7)           |
| North Korea                                   | 0.2 (0.2 to 0.2)           | 0.1 (0.1 to 0.1)           | 0.0 (0.0 to 0.0)           | 0.2 (0.0 to 1.9)           | -66.1 (-94.4 to 17.8)                          | 35.2 (-100.0 to 1353.7)             |
| Taiwan (Province of China)                    | 0.2 (0.1 to 0.2)           | 0.0 (0.0 to 0.0)           | 0.0 (0.0 to 0.0)           | 0.3 (0.0 to 2.4)           | -17.0 (-86.1 to 27.4)                          | 752.9 (-100.0 to 5968.1)            |
| <b>Oceania</b>                                |                            |                            |                            |                            |                                                |                                     |
| American Samoa                                | 0.0 (0.0 to 0.0)           | 0.0 (0.0 to 0.0)           | 0.0 (0.0 to 0.0)           | 1.6 (0.0 to 45.8)          | 8.5 (0.0 to 133.0)                             | 159687769.4 (0.0 to 45836600374.5)  |
| Federated States of Micronesia                | 0.0 (0.0 to 0.0)           | 4.8 (4.8 to 4.8)           | 0.0 (0.0 to 0.0)           | 1.1 (0.0 to 34.3)          | -109.1 (-118.0 to 13.1)                        | -77.8 (-100.0 to 609.2)             |
| Fiji                                          | 0.5 (0.5 to 0.5)           | 0.0 (0.0 to 0.0)           | 0.0 (0.0 to 0.0)           | 0.6 (0.0 to 6.1)           | 43.0 (0.0 to 119.5)                            | 604066426.6 (0.0 to 6085105276.0)   |
| Guam                                          | 0.0 (0.0 to 0.0)           | 0.0 (0.0 to 0.0)           | 0.0 (0.0 to 0.0)           | 0.3 (0.0 to 7.6)           | 8.8 (0.0 to 120.9)                             | 302875752.3 (0.0 to 7566016204.5)   |
| Kiribati                                      | 0.0 (0.0 to 0.0)           | 0.0 (0.0 to 0.0)           | 0.0 (0.0 to 0.0)           | 0.0 (0.0 to 0.0)           | 0.0 (0.0 to 0.0)                               | 0.0 (0.0 to 0.0)                    |
| Marshall Islands                              | 0.0 (0.0 to 0.0)           | 0.0 (0.0 to 0.0)           | 0.0 (0.0 to 0.0)           | 0.0 (0.0 to 0.0)           | 0.0 (0.0 to 0.0)                               | 0.0 (0.0 to 0.0)                    |
| Northern Mariana Islands                      | 0.0 (0.0 to 0.0)           | 0.0 (0.0 to 0.0)           | 0.0 (0.0 to 0.0)           | 0.0 (0.0 to 0.0)           | 0.0 (0.0 to 0.0)                               | 0.0 (0.0 to 0.0)                    |
| Papua New Guinea                              | 0.0 (0.0 to 0.0)           | 0.0 (0.0 to 0.0)           | 0.0 (0.0 to 0.0)           | 1.3 (0.0 to 32.0)          | 38.4 (0.0 to 130.6)                            | 1264889179.0 (0.0 to 32002799429.2) |

|                                                                        | Estimate in 2000 (95% UIs) | Estimate in 2015 (95% UIs) | Estimate in 2017 (95% UIs) | Estimate in 2020 (95% UIs) | Annualised rate of change, 2015-2020 (95% UIs) | Percent change, 2015-2020 (95% UIs) |
|------------------------------------------------------------------------|----------------------------|----------------------------|----------------------------|----------------------------|------------------------------------------------|-------------------------------------|
| Samoa                                                                  | 0.0 (0.0 to 0.0)           | 0.0 (0.0 to 0.0)           | 0.0 (0.0 to 0.0)           | 2.6 (0.0 to 62.6)          | 14.6 (0.0 to 135.0)                            | 2618131035.0 (0.0 to 62629991775.3) |
| Solomon Islands                                                        | 0.0 (0.0 to 0.0)           | 1.5 (1.5 to 1.5)           | 0.0 (0.0 to 0.0)           | 1.4 (0.0 to 25.8)          | -83.9 (-101.1 to 19.1)                         | -2.4 (-100.0 to 1646.7)             |
| Tonga                                                                  | 0.0 (0.0 to 0.0)           | 0.0 (0.0 to 0.0)           | 0.0 (0.0 to 0.0)           | 0.2 (0.0 to 5.3)           | 10.8 (0.0 to 118.6)                            | 252809514.8 (0.0 to 529559134.3)    |
| Vanuatu                                                                | 0.0 (0.0 to 0.0)           | 0.4 (3.9 to 4.0)           | 0.0 (0.0 to 0.0)           | 2.3 (0.0 to 44.1)          | -96.1 (-116.7 to 16.0)                         | -42.6 (-100.0 to 1002.7)            |
| <b>Southeast Asia</b>                                                  |                            |                            |                            |                            |                                                |                                     |
| Cambodia                                                               | 2.8 (2.4 to 3.1)           | 0.0 (0.0 to 0.0)           | 0.0 (0.0 to 0.0)           | 0.1 (0.0 to 1.8)           | 27.0 (0.0 to 111.3)                            | 133816720.9 (0.0 to 1780155360.6)   |
| Indonesia                                                              | 0.2 (0.2 to 0.2)           | 0.0 (0.0 to 0.0)           | 0.0 (0.0 to 0.0)           | 0.2 (0.0 to 1.8)           | -3.4 (-81.9 to 29.4)                           | 847.6 (-100.0 to 8118.0)            |
| Laos                                                                   | 0.3 (0.2 to 0.3)           | 0.0 (0.0 to 0.0)           | 0.0 (0.0 to 0.0)           | 0.1 (0.0 to 0.6)           | 25.2 (0.0 to 103.9)                            | 63702767.2 (0.0 to 585582072.6)     |
| Malaysia                                                               | 0.1 (0.1 to 0.1)           | 0.1 (0.1 to 0.1)           | 0.0 (0.0 to 0.0)           | 0.0 (0.0 to 0.4)           | -50.8 (-91.6 to 9.8)                           | -48.2 (-100.0 to 334.4)             |
| Maldives                                                               | 0.0 (0.0 to 0.0)           | 0.0 (0.0 to 0.0)           | 0.0 (0.0 to 0.0)           | 0.0 (0.0 to 0.0)           | 0.0 (0.0 to 0.0)                               | 0.0 (0.0 to 0.0)                    |
| Mauritius                                                              | 0.0 (0.0 to 0.0)           | 0.0 (0.0 to 0.0)           | 0.0 (0.0 to 0.0)           | 0.1 (0.0 to 0.9)           | 16.9 (0.0 to 107.1)                            | 5498383.2 (0.0 to 846715291.0)      |
| Myanmar                                                                | 0.0 (0.0 to 0.0)           | 0.4 (0.4 to 0.5)           | 0.0 (0.0 to 0.0)           | 0.1 (0.0 to 2.6)           | -64.4 (-102.1 to 11.7)                         | -69.9 (-100.0 to 480.1)             |
| Philippines                                                            | 0.5 (0.4 to 0.5)           | 0.1 (0.1 to 0.1)           | 0.1 (0.1 to 0.1)           | 0.8 (0.0 to 6.7)           | 2.7 (-91.6 to 28.0)                            | 783.4 (-100.0 to 6532.6)            |
| Sri Lanka                                                              | 0.1 (0.1 to 0.1)           | 0.1 (0.1 to 0.1)           | 0.2 (0.1 to 0.2)           | 0.2 (0.0 to 2.9)           | -40.0 (-93.0 to 21.7)                          | 96.8 (-100.0 to 2497.0)             |
| Seychelles                                                             | 0.0 (0.0 to 0.0)           | 0.0 (0.0 to 0.0)           | 0.0 (0.0 to 0.0)           | 0.0 (0.0 to 0.0)           | 0.0 (0.0 to 0.0)                               | 0.0 (0.0 to 0.0)                    |
| Thailand                                                               | 0.2 (0.1 to 0.2)           | 0.0 (0.0 to 0.0)           | 0.1 (0.1 to 0.1)           | 0.2 (0.0 to 2.0)           | -10.8 (-70.5 to 43.1)                          | 6142.1 (-100.0 to 64064.5)          |
| Timor-Leste                                                            | 0.0 (0.0 to 0.0)           | 0.0 (0.0 to 0.0)           | 0.0 (0.0 to 0.0)           | 0.0 (0.0 to 0.1)           | 4.6 (0.0 to 90.3)                              | 3610833.9 (0.0 to 75832124.1)       |
| Vietnam                                                                | 0.7 (0.7 to 0.8)           | 0.0 (0.0 to 0.1)           | 0.2 (0.2 to 0.2)           | 0.3 (0.0 to 3.0)           | -21.9 (-87.1 to 27.8)                          | 531.3 (-100.0 to 6374.1)            |
| <b>Sub-Saharan Africa</b>                                              |                            |                            |                            |                            |                                                |                                     |
| <b>Central Sub-Saharan Africa</b>                                      |                            |                            |                            |                            |                                                |                                     |
| Angola                                                                 | 0.4 (0.4 to 0.4)           | 0.3 (0.3 to 0.3)           | 0.0 (0.0 to 0.0)           | 0.0 (0.0 to 0.3)           | -78.6 (-99.6 to -40.4)                         | -89.7 (-100.0 to -5.7)              |
| Central African Republic                                               | 0.0 (0.0 to 0.0)           | 0.0 (0.0 to 0.0)           | 0.0 (0.0 to 0.0)           | 0.0 (0.0 to 0.1)           | 49.8 (-82.7 to 85.1)                           | -72.0 (-100.0 to 236.8)             |
| Congo                                                                  | 0.0 (0.0 to 0.0)           | 0.0 (0.0 to 0.0)           | 0.0 (0.0 to 0.0)           | 0.0 (0.0 to 0.2)           | 7.6 (0.0 to 98.3)                              | 11079255.8 (0.0 to 25376943.3)      |
| Democratic Republic of the Congo                                       | 0.0 (0.0 to 0.0)           | 0.0 (0.0 to 0.1)           | 0.7 (0.6 to 0.7)           | -61.0 (-87.2 to 13.3)      |                                                | -39.3 (-100.0 to 639.1)             |
| Equatorial Guinea                                                      | 0.0 (0.0 to 0.0)           | 0.0 (0.0 to 0.0)           | 0.0 (0.0 to 0.0)           | 0.0 (0.0 to 0.0)           | 0.0 (0.0 to 0.0)                               | 0.0 (0.0 to 0.0)                    |
| Gabon                                                                  | 0.0 (0.0 to 0.0)           | 0.0 (0.0 to 0.0)           | 0.0 (0.0 to 0.0)           | 0.0 (0.0 to 0.0)           | 0.0 (0.0 to 0.0)                               | 0.0 (0.0 to 0.0)                    |
| <b>Eastern Sub-Saharan Africa</b>                                      |                            |                            |                            |                            |                                                |                                     |
| Burundi                                                                | 0.0 (0.0 to 0.0)           | 0.4 (0.3 to 0.4)           | 0.1 (0.1 to 0.1)           | 0.0 (0.0 to 0.3)           | -86.2 (-101.5 to -1.1)                         | -92.5 (-100.0 to -14.8)             |
| Comoros                                                                | 0.0 (0.0 to 0.0)           | 0.0 (0.0 to 0.0)           | 0.0 (0.0 to 0.0)           | 0.3 (0.0 to 6.6)           | 13.5 (0.0 to 120.0)                            | 268091012.4 (0.0 to 6538164269.9)   |
| Djibouti                                                               | 0.0 (0.0 to 0.0)           | 0.0 (0.0 to 0.0)           | 0.0 (0.0 to 0.0)           | 0.0 (0.0 to 5.5)           | 6.9 (0.0 to 118.9)                             | 255131942.4 (0.0 to 5533647548.1)   |
| Eritrea                                                                | 0.0 (0.0 to 0.0)           | 0.0 (0.0 to 0.0)           | 0.0 (0.0 to 0.0)           | 0.0 (0.0 to 0.0)           | 0.0 (0.0 to 0.0)                               | 0.0 (0.0 to 0.0)                    |
| Ethiopia                                                               | 0.1 (0.1 to 0.1)           | 0.4 (0.0 to 0.0)           | 0.1 (0.1 to 0.1)           | 0.0 (0.0 to 0.3)           | 31.4 (0.0 to 99.8)                             | 2665288.6 (0.0 to 315699200.0)      |
| Kenya                                                                  | 0.0 (0.0 to 0.0)           | 0.2 (0.2 to 0.2)           | 0.1 (0.1 to 0.1)           | 0.1 (0.0 to 0.4)           | -64.5 (-96.1 to 5.1)                           | -72.0 (-100.0 to 118.7)             |
| Madagascar                                                             | 1.0 (0.8 to 1.1)           | 0.1 (0.1 to 0.1)           | 0.3 (0.3 to 0.3)           | 0.2 (0.0 to 1.3)           | -46.1 (-94.5 to 15.1)                          | 56.4 (-100.0 to 860.4)              |
| Malawi                                                                 | 0.0 (0.0 to 0.0)           | 1.7 (1.5 to 2.0)           | 0.0 (0.0 to 0.0)           | 0.1 (0.0 to 1.3)           | -87.2 (-112.0 to -2.3)                         | -96.9 (-100.0 to -28.7)             |
| Mozambique                                                             | 4.8 (4.2 to 5.5)           | 0.6 (0.5 to 0.7)           | 0.0 (0.0 to 0.0)           | 0.2 (0.0 to 3.1)           | -58.3 (-104.5 to 11.0)                         | -61.9 (-100.0 to 418.3)             |
| Rwanda                                                                 | 0.0 (0.0 to 0.0)           | 0.0 (0.0 to 0.0)           | 0.0 (0.0 to 0.0)           | 0.1 (0.0 to 0.9)           | -63.1 (-81.0 to 25.4)                          | 203.0 (-100.0 to 4430.3)            |
| Somalia                                                                | 0.0 (0.0 to 0.0)           | 0.0 (0.0 to 0.0)           | 0.0 (0.0 to 0.0)           | 0.1 (0.0 to 2.1)           | 24.1 (0.0 to 112.6)                            | 151193204.7 (0.0 to 2149119796.1)   |
| South Sudan                                                            | 0.0 (0.0 to 0.0)           | 0.0 (0.0 to 0.0)           | 0.0 (0.0 to 0.0)           | 0.0 (0.0 to 0.4)           | 4.5 (0.0 to 101.0)                             | 14047923.2 (0.0 to 382537701.7)     |
| Tanzania                                                               | 0.1 (0.1 to 0.1)           | 0.1 (0.1 to 0.1)           | 0.0 (0.0 to 0.0)           | 0.0 (0.0 to 0.2)           | -62.3 (-93.9 to 3.5)                           | -78.3 (-100.0 to 68.9)              |
| Uganda                                                                 | 0.0 (0.0 to 0.0)           | 0.0 (0.0 to 0.0)           | 0.0 (0.0 to 0.1)           | 0.0 (0.0 to 0.3)           | 20.0 (0.0 to 100.3)                            | 19783210.1 (0.0 to 340000592.3)     |
| Zambia                                                                 | 0.0 (0.0 to 0.0)           | 0.0 (0.0 to 0.0)           | 0.0 (0.0 to 0.0)           | 0.0 (0.0 to 0.1)           | 11.0 (0.0 to 93.3)                             | 7708556.4 (0.0 to 119957715.7)      |
| <b>Southern Sub-Saharan Africa</b>                                     |                            |                            |                            |                            |                                                |                                     |
| Botswana                                                               | 0.2 (0.2 to 0.2)           | 0.2 (0.0 to 0.0)           | 0.0 (0.0 to 0.3)           | 0.0 (0.0 to 0.3)           | 6.0 (0.0 to 99.8)                              | 15210700.9 (0.0 to 317872759.6)     |
| Lesotho                                                                | 0.0 (0.0 to 0.0)           | 0.0 (0.0 to 0.0)           | 0.0 (0.0 to 0.0)           | 0.0 (0.0 to 0.8)           | 6.4 (0.0 to 106.1)                             | 41959594.3 (0.0 to 821824167.2)     |
| Namibia                                                                | 0.0 (0.0 to 0.0)           | 0.0 (0.0 to 0.0)           | 0.0 (0.0 to 0.0)           | 0.1 (0.0 to 2.6)           | 12.6 (0.0 to 114.0)                            | 128926639.7 (0.0 to 2650130492.8)   |
| South Africa                                                           | 0.2 (0.2 to 0.2)           | 0.0 (0.0 to 0.0)           | 0.0 (0.0 to 0.0)           | 0.0 (0.0 to 0.3)           | 45.4 (0.0 to 99.0)                             | 39184189.1 (0.0 to 281955498.6)     |
| Swaziland                                                              | 0.0 (0.0 to 0.0)           | 0.0 (0.0 to 0.0)           | 0.0 (0.0 to 0.0)           | 0.0 (0.0 to 0.7)           | 4.9 (0.0 to 105.2)                             | 22025251.8 (0.0 to 709810651.2)     |
| Zimbabwe                                                               | 0.6 (0.5 to 0.7)           | 0.1 (0.1 to 0.1)           | 0.0 (0.0 to 0.0)           | 0.0 (0.0 to 0.5)           | -77.9 (-93.3 to 9.3)                           | -73.8 (-100.0 to 303.5)             |
| <b>Western Sub-Saharan Africa</b>                                      |                            |                            |                            |                            |                                                |                                     |
| Benin                                                                  | 0.0 (0.0 to 0.0)           | 0.0 (0.0 to 0.0)           | 0.0 (0.0 to 0.0)           | 0.0 (0.0 to 0.3)           | 13.7 (0.0 to 100.2)                            | 20380049.8 (0.0 to 325109556.8)     |
| Burkina Faso                                                           | 0.0 (0.0 to 0.0)           | 0.0 (0.0 to 0.1)           | 0.0 (0.0 to 0.0)           | 0.0 (0.0 to 0.2)           | -70.5 (-86.9 to 9.0)                           | -66.5 (-100.0 to 285.1)             |
| Cameroon                                                               | 0.0 (0.0 to 0.0)           | 0.0 (0.0 to 0.0)           | 0.0 (0.0 to 0.0)           | 0.0 (0.0 to 0.2)           | -60.2 (-80.3 to 17.7)                          | -12.7 (-100.0 to 1327.2)            |
| Cape Verde                                                             | 0.0 (0.0 to 0.0)           | 1.7 (1.5 to 1.9)           | 0.0 (0.0 to 0.0)           | 0.1 (0.0 to 1.0)           | -103.8 (-111.7 to -3.5)                        | -96.9 (-100.0 to -41.1)             |
| Chad                                                                   | 0.0 (0.0 to 0.0)           | 0.0 (0.0 to 0.0)           | 0.0 (0.0 to 0.0)           | 0.0 (0.0 to 0.5)           | 13.6 (0.0 to 102.4)                            | 35518204.9 (0.0 to 466352340.4)     |
| Cote d'Ivoire                                                          | 0.0 (0.0 to 0.0)           | 0.1 (0.1 to 0.1)           | 0.1 (0.1 to 0.1)           | 0.0 (0.0 to 1.1)           | -79.9 (-90.2 to 3.6)                           | -88.4 (-100.0 to 71.8)              |
| The Gambia                                                             | 0.0 (0.0 to 0.0)           | 0.0 (0.0 to 0.0)           | 0.0 (0.0 to 0.0)           | 0.0 (0.0 to 0.2)           | 9.3 (0.0 to 97.1)                              | 14648398.0 (0.0 to 212251840.7)     |
| Ghana                                                                  | 0.0 (0.0 to 0.0)           | 0.1 (0.1 to 0.1)           | 0.1 (0.1 to 0.1)           | 0.0 (0.0 to 0.2)           | -73.6 (-92.0 to 3.8)                           | -84.3 (-100.0 to 75.6)              |
| Guinea                                                                 | 0.1 (0.0 to 0.1)           | 0.1 (0.1 to 0.2)           | 0.0 (0.0 to 0.0)           | 0.0 (0.0 to 0.1)           | -86.9 (-95.2 to -2.8)                          | -96.5 (-100.0 to -34.0)             |
| Guinea-Bissau                                                          | 0.0 (0.0 to 0.0)           | 0.0 (0.0 to 0.0)           | 0.0 (0.0 to 0.0)           | 0.0 (0.0 to 0.1)           | 3.3 (0.0 to 90.1)                              | 2738848.1 (0.0 to 7402923.1)        |
| Liberia                                                                | 0.0 (0.0 to 0.0)           | 0.0 (0.0 to 0.0)           | 0.0 (0.0 to 0.0)           | 0.0 (0.0 to 0.3)           | 6.0 (0.0 to 98.8)                              | 9002207.9 (0.0 to 280385488.7)      |
| Mali                                                                   | 0.1 (0.1 to 0.1)           | 0.0 (0.0 to 0.0)           | 0.0 (0.0 to 0.0)           | 0.0 (0.0 to 0.2)           | -62.6 (-84.0 to 11.6)                          | -43.8 (-100.0 to 472.8)             |
| Mauritania                                                             | 0.0 (0.0 to 0.0)           | 0.0 (0.0 to 0.0)           | 0.5 (0.4 to 0.5)           | 0.0 (0.0 to 0.6)           | 14.2 (0.0 to 104.0)                            | 29721668.3 (0.0 to 59734607.6)      |
| Niger                                                                  | 0.0 (0.0 to 0.0)           | 0.1 (0.1 to 0.2)           | 0.3 (0.3 to 0.4)           | 0.0 (0.0 to 0.4)           | -67.4 (-95.0 to 6.7)                           | -76.3 (-100.0 to 175.0)             |
| Nigeria                                                                | 0.0 (0.0 to 0.0)           | 0.0 (0.0 to 0.0)           | 0.0 (0.0 to 0.0)           | 0.0 (0.0 to 0.1)           | -56.5 (-84.2 to 9.0)                           | -53.9 (-100.0 to 284.2)             |
| Sao Tome and Principe                                                  | 0.0 (0.0 to 0.0)           | 0.0 (0.0 to 0.0)           | 0.0 (0.0 to 0.0)           | 0.0 (0.0 to 0.0)           | 0.0 (0.0 to 0.0)                               | 0.0 (0.0 to 0.0)                    |
| Senegal                                                                | 0.0 (0.0 to 0.0)           | 0.0 (0.0 to 0.0)           | 0.0 (0.0 to 0.0)           | 0.0 (0.0 to 0.2)           | 15.8 (0.0 to 96.7)                             | 13387596.6 (0.0 to 198093789.7)     |
| Sierra Leone                                                           | 0.0 (0.0 to 0.0)           | 0.1 (0.1 to 0.1)           | 3.2 (3.1 to 3.3)           | 0.1 (0.0 to 1.2)           | -79.2 (-94.9 to 14.4)                          | -50.0 (-100.0 to 761.4)             |
| Togo                                                                   | 0.0 (0.0 to 0.0)           | 0.0 (0.0 to 0.0)           | 0.0 (0.0 to 0.0)           | 0.0 (0.0 to 0.2)           | 5.1 (0.0 to 97.6)                              | 8441673.0 (0.0 to 228712998.3)      |
| <b>Indicator 2.2.1: Prevalence of stunting in children under 5 (%)</b> |                            |                            |                            |                            |                                                |                                     |
| <b>Central Europe, Eastern Europe, and Central Asia</b>                |                            |                            |                            |                            |                                                |                                     |
| <b>Central Asia</b>                                                    |                            |                            |                            |                            |                                                |                                     |
| Armenia                                                                | 19.6 (17.8 to 21.4)        | 14.6 (12.8 to 16.4)        | 12.8 (10.8 to 14.9)        | 8.7 (6.3 to 11.6)          | -3.5 (-4.9 to -2.1)                            | -40.6 (-52.1 to -27.5)              |
| Azerbaijan                                                             | 25.4 (23.9 to 27.0)        | 16.6 (14.2 to 18.9)        | 15.8 (12.9 to 18.8)        | 10.9 (7.3 to 15.4)         | -2.9 (-4.6 to -1.3)                            | -34.4 (-49.7 to -18.0)              |
| Georgia                                                                | 16.4 (14.7 to 18.1)        | 12.5 (9.8 to 15.4)         | 12.1 (9.1 to 15.4)         | 10.0 (5.9 to 15.3)         | -1.6 (-3.6 to 0.2)                             | -21.1 (-41.3 to 2.8)                |
| Kazakhstan                                                             | 19.2 (17.3 to 21.3)        | 11.7 (10.3 to 13.2)        | 10.7 (8.9 to 12.5)         | 6.9 (4.9 to 9.6)           | -3.6 (-5.3 to -2.0)                            | -41.6 (-54.6 to -25.7)              |
| Kyrgyzstan                                                             | 28.1 (25.8 to 31.2)        | 17.7 (16.1 to 19.6)        | 16.7 (14.5 to 19.0)        | 11.4 (8.6 to 14.7)         | -3.0 (-4.4 to -1.7)                            | -35.7 (-48.7 to -22.6)              |
| Mongolia                                                               | 35.0 (32.1 to 39.3)        | 16.5 (14.6 to 18.4)        | 15.6 (13.2 to 18.0)        | 8.6 (6.1 to 11.5)          | -4.4 (-6.0 to -2.8)                            | -47.9 (-59.6 to -34.7)              |
| Tajikistan                                                             | 40.6 (38.0 to 44.4)        | 31.4 (27.5 to 38.8)        | 30.5 (25.5 to 41.1)        | 24.6 (17.3 to 40.7)        | -1.7 (-3.3 to 0.3)                             | -22.2 (-38.7 to 5.1)                |
| Turkmenistan                                                           | 26.3 (24.9 to 27.8)        | 13.4 (11.9 to 15.0)        | 12.3 (10.5 to 14.2)        | 6.9 (4.9 to 9.2)           | -4.5 (-6.0 to -3.2)                            | -49.1 (-59.3 to -37.9)              |

|                                    | Estimate in 2000 (95% UIs) | Estimate in 2015 (95% UIs) | Estimate in 2017 (95% UIs) | Estimate in 2030 (95% UIs) | Annualised rate of change, 2015-2030 (95% UIs) | Percent change, 2015-2030 (95% UIs) |
|------------------------------------|----------------------------|----------------------------|----------------------------|----------------------------|------------------------------------------------|-------------------------------------|
| Uzbekistan                         | 33.7 (30.5 to 39.5)        | 20.1 (15.9 to 24.7)        | 19.3 (14.7 to 24.3)        | 13.1 (7.9 to 20.1)         | -3.0 (-4.9 to -1.2)                            | -35.6 (-52.3 to -16.7)              |
| <b>Central Europe</b>              |                            |                            |                            |                            |                                                |                                     |
| Albania                            | 35.4 (32.3 to 39.8)        | 22.3 (18.5 to 26.2)        | 21.8 (17.5 to 26.2)        | 16.1 (10.6 to 22.7)        | -2.3 (-4.1 to -0.8)                            | -28.8 (-45.9 to -11.3)              |
| Bosnia and Herzegovina             | 12.6 (10.0 to 15.3)        | 8.7 (6.6 to 11.4)          | 8.5 (6.1 to 11.3)          | 6.5 (4.1 to 10.8)          | -2.0 (-4.3 to 0.1)                             | -25.3 (-47.7 to 0.8)                |
| Bulgaria                           | 12.3 (9.0 to 16.1)         | 9.6 (6.8 to 13.1)          | 9.4 (6.4 to 13.2)          | 8.2 (4.4 to 14.3)          | -1.2 (-3.5 to 1.0)                             | -15.6 (-40.6 to 16.5)               |
| Croatia                            | 10.3 (6.7 to 14.5)         | 8.1 (5.1 to 11.4)          | 8.0 (4.9 to 11.5)          | 7.1 (3.4 to 12.1)          | -1.1 (-3.5 to 1.3)                             | -13.2 (-41.0 to 22.3)               |
| Czech Republic                     | 3.7 (2.5 to 5.3)           | 3.8 (2.4 to 5.8)           | 3.8 (2.3 to 5.9)           | 4.0 (1.9 to 7.5)           | 0.2 (-2.4 to 2.5)                              | 4.7 (-30.2 to 46.3)                 |
| Hungary                            | 10.7 (6.9 to 14.9)         | 8.4 (5.4 to 11.9)          | 8.3 (5.2 to 12.1)          | 7.4 (3.8 to 12.8)          | -1.0 (-3.4 to 1.3)                             | -13.1 (-39.8 to 22.4)               |
| Macedonia                          | 10.0 (7.7 to 12.6)         | 7.1 (5.2 to 9.3)           | 6.9 (4.9 to 9.2)           | 5.6 (3.1 to 9.4)           | -1.8 (-4.0 to 0.5)                             | -22.6 (-45.5 to 8.0)                |
| Montenegro                         | 11.0 (8.2 to 14.2)         | 9.7 (7.6 to 12.6)          | 9.7 (7.2 to 12.6)          | 9.5 (5.6 to 14.4)          | -0.3 (-2.6 to 1.7)                             | -3.4 (-32.3 to 28.6)                |
| Poland                             | 10.5 (6.7 to 15.0)         | 7.9 (5.0 to 11.7)          | 7.7 (4.8 to 11.7)          | 6.4 (3.2 to 11.6)          | -1.5 (-4.1 to 0.8)                             | -19.3 (-45.6 to 13.2)               |
| Romania                            | 17.2 (16.0 to 18.5)        | 11.8 (8.8 to 15.3)         | 11.5 (8.3 to 15.3)         | 9.2 (5.0 to 15.0)          | -1.8 (-3.9 to 0.1)                             | -22.7 (-44.7 to 1.8)                |
| Serbia                             | 11.4 (9.1 to 13.9)         | 9.0 (7.7 to 10.5)          | 8.3 (6.7 to 10.3)          | 6.7 (4.2 to 10.2)          | -2.1 (-4.3 to 0.1)                             | -25.8 (-47.2 to 1.3)                |
| Slovakia                           | 9.7 (6.4 to 13.7)          | 7.7 (5.1 to 11.2)          | 7.6 (4.9 to 11.2)          | 6.9 (3.3 to 11.8)          | -1.0 (-3.4 to 1.1)                             | -12.5 (-40.2 to 18.5)               |
| Slovenia                           | 9.2 (6.0 to 13.3)          | 7.4 (4.9 to 10.9)          | 7.3 (4.6 to 10.9)          | 6.7 (3.3 to 11.8)          | -0.9 (-3.3 to 1.5)                             | -10.7 (-39.0 to 25.0)               |
| <b>Eastern Europe</b>              |                            |                            |                            |                            |                                                |                                     |
| Belarus                            | 6.5 (4.9 to 8.5)           | 4.6 (3.2 to 6.4)           | 4.6 (3.0 to 6.6)           | 4.1 (2.0 to 7.6)           | -1.1 (-3.6 to 1.5)                             | -12.9 (-42.0 to 25.1)               |
| Estonia                            | 10.4 (6.8 to 15.0)         | 7.9 (5.2 to 11.3)          | 7.8 (5.0 to 11.1)          | 6.8 (3.3 to 11.6)          | -1.3 (-3.8 to 1.1)                             | -16.0 (-43.2 to 17.9)               |
| Latvia                             | 11.4 (7.3 to 16.1)         | 8.5 (5.5 to 12.3)          | 8.4 (5.3 to 12.4)          | 7.4 (3.8 to 13.0)          | -1.1 (-3.6 to 1.2)                             | -13.7 (-41.9 to 19.8)               |
| Lithuania                          | 10.8 (7.2 to 15.5)         | 8.1 (5.2 to 12.0)          | 8.0 (5.0 to 12.0)          | 7.0 (3.5 to 12.0)          | -1.2 (-3.7 to 1.0)                             | -15.6 (-42.4 to 16.8)               |
| Moldova                            | 13.1 (9.5 to 17.1)         | 8.4 (6.0 to 11.4)          | 8.3 (5.6 to 11.3)          | 6.3 (3.2 to 10.8)          | -2.1 (-4.7 to 0.2)                             | -25.9 (-50.5 to 3.6)                |
| Russia                             | 15.0 (13.4 to 16.6)        | 11.2 (8.2 to 14.5)         | 11.1 (7.7 to 14.7)         | 9.5 (5.2 to 14.8)          | -1.3 (-3.3 to 0.5)                             | -16.8 (-38.9 to 8.0)                |
| Ukraine                            | 21.8 (19.1 to 24.4)        | 16.0 (11.8 to 20.7)        | 15.6 (11.3 to 20.6)        | 12.9 (7.3 to 20.1)         | -1.6 (-3.6 to 0.1)                             | -20.3 (-42.1 to 1.8)                |
| <b>High-income</b>                 |                            |                            |                            |                            |                                                |                                     |
| <b>Australasia</b>                 |                            |                            |                            |                            |                                                |                                     |
| Australia                          | 5.3 (3.2 to 8.2)           | 4.7 (2.9 to 7.1)           | 4.6 (2.7 to 7.2)           | 4.5 (2.0 to 8.4)           | -0.6 (-3.5 to 2.0)                             | -6.4 (-41.0 to 35.6)                |
| New Zealand                        | 5.7 (3.5 to 8.6)           | 5.2 (3.2 to 8.0)           | 5.1 (3.0 to 7.8)           | 4.9 (2.3 to 9.2)           | -0.6 (-3.1 to 2.0)                             | -6.7 (-37.4 to 34.4)                |
| <b>High-income Asia Pacific</b>    |                            |                            |                            |                            |                                                |                                     |
| Brunei                             | 11.6 (8.2 to 15.3)         | 12.0 (9.0 to 15.4)         | 11.6 (8.2 to 15.4)         | 11.6 (6.3 to 18.0)         | -0.4 (-2.7 to 1.7)                             | -4.4 (-33.6 to 28.8)                |
| Japan                              | 9.2 (8.7 to 9.8)           | 8.6 (8.2 to 9.0)           | 8.5 (8.1 to 9.0)           | 8.0 (7.2 to 8.9)           | -0.4 (-1.0 to 0.1)                             | -6.4 (-13.3 to 0.8)                 |
| South Korea                        | 2.9 (2.0 to 3.9)           | 3.2 (2.6 to 4.1)           | 3.1 (2.3 to 4.2)           | 3.4 (1.8 to 5.8)           | 0.0 (-3.0 to 2.7)                              | 3.1 (-35.9 to 50.1)                 |
| Singapore                          | 3.7 (2.8 to 4.9)           | 3.6 (2.3 to 5.3)           | 3.5 (2.2 to 5.3)           | 3.5 (1.6 to 6.6)           | -0.3 (-2.9 to 2.0)                             | -3.3 (-35.3 to 35.5)                |
| <b>High-income North America</b>   |                            |                            |                            |                            |                                                |                                     |
| Canada                             | 3.5 (2.1 to 5.5)           | 3.1 (1.8 to 4.9)           | 3.0 (1.8 to 4.9)           | 3.0 (1.4 to 5.8)           | -0.3 (-3.2 to 2.3)                             | -2.7 (-38.3 to 40.8)                |
| Greenland                          | 5.2 (3.1 to 8.0)           | 4.2 (2.6 to 6.3)           | 4.2 (2.5 to 6.4)           | 4.0 (1.7 to 7.3)           | -0.7 (-3.5 to 2.1)                             | -7.3 (-40.4 to 37.2)                |
| United States                      | 3.1 (2.4 to 4.0)           | 2.4 (1.7 to 3.3)           | 2.4 (1.6 to 3.4)           | 2.1 (1.0 to 3.7)           | -1.2 (-3.7 to 1.4)                             | -14.6 (-42.5 to 23.1)               |
| <b>Southern Latin America</b>      |                            |                            |                            |                            |                                                |                                     |
| Argentina                          | 13.0 (11.8 to 14.2)        | 8.1 (5.7 to 10.7)          | 7.8 (5.3 to 10.7)          | 5.9 (3.1 to 10.2)          | -2.3 (-4.5 to -0.2)                            | -28.1 (-48.8 to -2.8)               |
| Chile                              | 4.9 (4.2 to 5.7)           | 4.1 (3.0 to 5.3)           | 3.9 (2.7 to 5.3)           | 3.3 (1.6 to 5.8)           | -1.7 (-4.2 to 0.8)                             | -21.3 (-46.4 to 13.0)               |
| Uruguay                            | 11.6 (9.8 to 13.4)         | 10.2 (7.5 to 13.3)         | 9.9 (7.0 to 13.3)          | 8.8 (4.8 to 14.7)          | -1.2 (-3.4 to 0.8)                             | -15.4 (-39.7 to 12.8)               |
| <b>Western Europe</b>              |                            |                            |                            |                            |                                                |                                     |
| Andorra                            | 2.6 (1.5 to 4.2)           | 2.6 (1.5 to 4.2)           | 2.5 (1.5 to 4.2)           | 2.7 (1.2 to 4.4)           | 0.2 (-2.8 to 3.0)                              | 5.1 (-34.3 to 57.7)                 |
| Austria                            | 3.0 (1.7 to 4.7)           | 2.8 (1.7 to 4.5)           | 2.8 (1.6 to 4.6)           | 2.9 (1.3 to 7.7)           | -0.1 (-2.8 to 2.5)                             | 0.6 (-34.1 to 44.7)                 |
| Belgium                            | 2.8 (1.6 to 4.4)           | 2.7 (1.6 to 4.4)           | 2.6 (1.6 to 4.4)           | 2.7 (1.3 to 5.6)           | -0.1 (-2.9 to 2.5)                             | 0.3 (-34.9 to 45.8)                 |
| Cyprus                             | 3.1 (1.9 to 5.1)           | 2.8 (1.7 to 4.5)           | 2.8 (1.6 to 4.5)           | 2.8 (1.3 to 5.3)           | -0.2 (-3.0 to 2.3)                             | -0.5 (-36.6 to 41.9)                |
| Denmark                            | 2.5 (1.4 to 4.0)           | 2.4 (1.5 to 3.8)           | 2.4 (1.4 to 3.8)           | 2.5 (1.2 to 4.7)           | 0.0 (-2.7 to 2.6)                              | 2.5 (-33.1 to 47.5)                 |
| Finland                            | 2.7 (1.6 to 4.3)           | 2.6 (1.6 to 4.1)           | 2.6 (1.6 to 4.1)           | 2.6 (1.2 to 5.1)           | -0.1 (-2.9 to 2.4)                             | -0.0 (-35.4 to 44.2)                |
| France                             | 3.0 (1.8 to 4.7)           | 2.9 (1.7 to 4.5)           | 2.8 (1.6 to 4.6)           | 2.9 (1.3 to 5.2)           | -0.2 (-3.2 to 2.3)                             | -0.6 (-37.7 to 42.2)                |
| Germany                            | 1.2 (0.7 to 1.9)           | 1.1 (0.6 to 1.7)           | 1.1 (0.6 to 1.7)           | 1.1 (0.5 to 2.2)           | -0.2 (-3.0 to 2.7)                             | 0.1 (-36.0 to 49.9)                 |
| Greece                             | 3.3 (2.0 to 5.0)           | 3.1 (1.9 to 5.0)           | 3.1 (1.9 to 5.1)           | 3.3 (1.5 to 6.5)           | 0.1 (-2.4 to 2.7)                              | 4.1 (-30.7 to 49.3)                 |
| Iceland                            | 2.7 (1.6 to 4.4)           | 2.5 (1.5 to 4.0)           | 2.5 (1.5 to 3.9)           | 2.5 (1.1 to 4.8)           | -0.3 (-2.9 to 2.3)                             | -1.6 (-35.3 to 41.4)                |
| Ireland                            | 3.0 (1.7 to 4.6)           | 2.7 (1.6 to 4.2)           | 2.6 (1.6 to 4.3)           | 2.6 (1.2 to 5.0)           | -0.5 (-3.2 to 2.1)                             | -4.5 (-38.3 to 36.9)                |
| Israel                             | 3.3 (2.0 to 5.2)           | 3.2 (2.0 to 5.0)           | 3.2 (1.9 to 5.0)           | 3.1 (1.5 to 6.1)           | -0.1 (-2.7 to 2.3)                             | 0.9 (-33.0 to 41.2)                 |
| Italy                              | 3.0 (1.8 to 4.7)           | 2.9 (1.8 to 4.6)           | 2.9 (1.7 to 4.7)           | 3.1 (1.4 to 6.0)           | 0.1 (-2.8 to 2.7)                              | 4.2 (-34.3 to 48.8)                 |
| Luxembourg                         | 2.5 (1.5 to 4.1)           | 2.5 (1.5 to 3.8)           | 2.5 (1.4 to 3.8)           | 2.5 (1.2 to 4.7)           | -0.0 (-2.8 to 2.6)                             | 1.7 (-34.4 to 46.6)                 |
| Malta                              | 3.3 (1.9 to 5.3)           | 3.1 (1.9 to 5.0)           | 3.0 (1.8 to 5.0)           | 3.0 (1.4 to 6.0)           | -0.3 (-3.1 to 2.3)                             | -2.5 (-36.8 to 41.9)                |
| Netherlands                        | 2.6 (1.6 to 4.3)           | 2.5 (1.5 to 4.1)           | 2.5 (1.4 to 4.1)           | 2.5 (1.1 to 4.9)           | -0.1 (-3.0 to 2.3)                             | 0.1 (-36.3 to 41.8)                 |
| Norway                             | 2.6 (1.5 to 4.0)           | 2.5 (1.5 to 4.0)           | 2.5 (1.4 to 4.0)           | 2.5 (1.1 to 4.8)           | -0.1 (-3.1 to 2.5)                             | 0.1 (-37.2 to 44.4)                 |
| Portugal                           | 4.0 (2.3 to 6.2)           | 3.6 (2.2 to 5.8)           | 3.6 (2.1 to 5.7)           | 3.5 (1.7 to 5.7)           | -0.4 (-3.0 to 3.5)                             | -4.1 (-36.4 to 35.6)                |
| Spain                              | 1.5 (1.0 to 2.3)           | 1.4 (0.9 to 2.3)           | 1.4 (0.8 to 2.4)           | 1.4 (0.6 to 2.9)           | -0.2 (-2.8 to 2.5)                             | -0.4 (-34.5 to 45.0)                |
| Sweden                             | 2.8 (1.6 to 4.6)           | 2.7 (1.6 to 4.2)           | 2.6 (1.5 to 4.2)           | 2.7 (1.2 to 5.2)           | -0.2 (-3.2 to 2.4)                             | -0.3 (-38.1 to 43.4)                |
| Switzerland                        | 2.7 (1.6 to 4.3)           | 2.6 (1.6 to 4.1)           | 2.6 (1.5 to 4.1)           | 2.7 (1.3 to 5.2)           | -0.0 (-2.8 to 2.6)                             | 1.8 (-34.2 to 46.9)                 |
| United Kingdom                     | 3.2 (1.9 to 5.0)           | 3.0 (1.8 to 4.6)           | 2.9 (1.7 to 4.5)           | 2.9 (1.4 to 5.3)           | -0.4 (-3.1 to 2.1)                             | -4.2 (-37.3 to 36.2)                |
| <b>Latin America and Caribbean</b> |                            |                            |                            |                            |                                                |                                     |
| <b>Andean Latin America</b>        |                            |                            |                            |                            |                                                |                                     |
| Bolivia                            | 35.4 (33.5 to 38.2)        | 19.2 (17.1 to 21.9)        | 17.6 (14.7 to 21.1)        | 9.6 (6.5 to 13.8)          | -4.8 (-6.5 to -2.8)                            | -50.5 (-62.4 to -34.7)              |
| Ecuador                            | 31.0 (29.4 to 33.2)        | 22.7 (20.6 to 25.5)        | 21.5 (18.5 to 24.8)        | 15.7 (11.3 to 21.4)        | -2.6 (-4.0 to -0.8)                            | -31.4 (-45.4 to -11.2)              |
| Peru                               | 38.0 (35.4 to 42.4)        | 18.7 (18.1 to 19.4)        | 13.6 (12.5 to 14.8)        | 5.8 (5.2 to 6.5)           | -7.8 (-8.4 to -7.2)                            | -69.0 (-71.8 to -66.1)              |
| <b>Caribbean</b>                   |                            |                            |                            |                            |                                                |                                     |
| Antigua and Barbuda                | 9.2 (5.8 to 13.4)          | 7.8 (4.8 to 11.6)          | 7.8 (4.7 to 11.5)          | 7.3 (3.4 to 12.5)          | -0.7 (-3.2 to 1.7)                             | -7.9 (-38.5 to 28.7)                |
| The Bahamas                        | 7.8 (4.8 to 11.7)          | 6.9 (4.3 to 10.4)          | 6.9 (4.3 to 10.4)          | 6.7 (3.5 to 11.6)          | -0.4 (-2.8 to 1.8)                             | -3.7 (-34.3 to 31.9)                |
| Barbados                           | 8.6 (5.5 to 12.4)          | 7.5 (4.8 to 11.2)          | 7.3 (4.7 to 11.2)          | 7.2 (3.6 to 12.3)          | -0.5 (-3.2 to 1.8)                             | -5.8 (-38.5 to 31.0)                |
| Belize                             | 23.7 (20.2 to 27.4)        | 16.7 (15.6 to 17.7)        | 15.5 (14.2 to 16.9)        | 10.8 (8.7 to 13.2)         | -2.9 (-4.1 to -1.8)                            | -35.1 (-45.6 to -23.6)              |
| Bermuda                            | 7.0 (4.2 to 10.5)          | 6.2 (3.8 to 9.4)           | 6.2 (3.8 to 9.3)           | 6.0 (2.9 to 10.5)          | -0.4 (-3.0 to 1.8)                             | -4.2 (-35.9 to 31.6)                |
| Cuba                               | 7.6 (6.4 to 8.9)           | 8.6 (6.8 to 10.8)          | 8.6 (6.6 to 10.8)          | 9.7 (6.1 to 15.9)          | 0.7 (-1.0 to 2.3)                              | 12.3 (-14.1 to 41.4)                |
| Dominica                           | 11.0 (7.1 to 16.1)         | 8.7 (5.5 to 12.8)          | 8.6 (5.2 to 12.6)          | 7.5 (3.7 to 13.5)          | -1.1 (-3.5 to 1.2)                             | -14.2 (-41.2 to 20.6)               |
| Dominican Republic                 | 13.1 (11.9 to 14.2)        | 9.9 (8.4 to 11.6)          | 9.7 (7.9 to 11.9)          | 7.9 (5.2 to 11.8)          | -1.6 (-3.5 to 0.3)                             | -20.6 (-40.5 to 4.6)                |
| Grenada                            | 11.9 (7.9 to 16.6)         | 9.7 (6.3 to 13.8)          | 9.5 (6.0 to 13.8)          | 8.4 (4.1 to 14.8)          | -1.2 (-3.6 to 1.3)                             | -14.4 (-41.7 to 21.6)               |
| Guyana                             | 16.5 (15.2 to 17.9)        | 14.5 (12.8 to 16.4)        | 10.9 (7.4 to 15.6)         | 13.4 (11.2 to 16.6)        | -2.1 (-3.8 to -0.6)                            | -27.0 (-43.5 to -9.0)               |
| Haiti                              | 30.6 (29.1 to 32.3)        | 24.0 (22.7 to 25.2)        | 23.3 (21.3 to 25.1)        | 18.3 (15.3 to 21.6)        | -1.8 (-2.8 to -0.9)                            | -23.9 (-34.3 to -12.8)              |

|                                               | Estimate in 2000 (95% UIs) | Estimate in 2015 (95% UIs) | Estimate in 2017 (95% UIs) | Estimate in 2030 (95% UIs) | Annualised rate of change, 2015-2030 (95% UIs) | Percent change, 2015-2030 (95% UIs) |
|-----------------------------------------------|----------------------------|----------------------------|----------------------------|----------------------------|------------------------------------------------|-------------------------------------|
| <b>Jamaica</b>                                | 8.7 (7.7 to 9.7)           | 7.7 (6.1 to 9.4)           | 7.6 (5.7 to 9.6)           | 7.1 (4.1 to 10.8)          | -0.7 (-2.7 to 1.1)                             | -8.6 (-33.4 to 18.5)                |
| <b>Puerto Rico</b>                            | 74.4 (7.0 to 10.9)         | 6.3 (3.7 to 9.4)           | 6.2 (3.6 to 9.4)           | 5.7 (2.7 to 10.1)          | -0.8 (-3.7 to 1.5)                             | -30.1 (-38.9 to -25.0)              |
| <b>Saint Lucia</b>                            | 6.8 (4.2 to 9.9)           | 4.4 (2.8 to 6.5)           | 4.4 (2.8 to 6.4)           | 3.5 (1.6 to 6.2)           | -1.9 (-4.8 to 0.8)                             | -22.7 (-51.0 to 13.4)               |
| <b>Saint Vincent and the Grenadines</b>       | 13.1 (9.0 to 17.9)         | 10.4 (6.8 to 14.4)         | 10.2 (6.6 to 14.2)         | 8.8 (4.6 to 14.5)          | -1.2 (-3.5 to 0.8)                             | -15.8 (-41.0 to 12.4)               |
| <b>Suriname</b>                               | 14.2 (12.5 to 16.0)        | 9.1 (7.1 to 11.4)          | 8.9 (6.6 to 11.7)          | 6.8 (3.7 to 11.2)          | -2.2 (-4.6 to 0.1)                             | -26.6 (-49.7 to 1.2)                |
| <b>Trinidad and Tobago</b>                    | 5.3 (3.9 to 7.0)           | 4.8 (2.9 to 7.1)           | 4.7 (2.9 to 7.2)           | 4.7 (2.9 to 7.2)           | -0.4 (-3.2 to 2.1)                             | -4.0 (-37.8 to 36.2)                |
| <b>Virgin Islands, U.S.</b>                   | 7.2 (4.5 to 11.0)          | 6.1 (3.7 to 9.4)           | 6.0 (3.6 to 9.4)           | 5.8 (2.8 to 10.5)          | -0.6 (-3.3 to 2.0)                             | -6.7 (-38.8 to 35.9)                |
| <b>Central Latin America</b>                  |                            |                            |                            |                            |                                                |                                     |
| <b>Colombia</b>                               | 19.6 (18.2 to 20.9)        | 13.0 (10.8 to 15.3)        | 12.7 (9.9 to 15.5)         | 9.5 (5.9 to 14.5)          | -2.2 (-4.2 to -0.3)                            | -27.4 (-47.0 to -4.5)               |
| <b>Costa Rica</b>                             | 11.5 (7.9 to 15.8)         | 8.6 (6.0 to 11.6)          | 8.5 (5.8 to 11.8)          | 7.6 (3.7 to 12.6)          | -1.1 (-3.7 to 1.3)                             | -13.1 (-42.6 to 20.7)               |
| <b>El Salvador</b>                            | 28.9 (27.8 to 30.5)        | 14.9 (13.4 to 16.8)        | 13.9 (11.9 to 16.2)        | 8.0 (5.7 to 11.0)          | -4.3 (-5.9 to -2.6)                            | -46.8 (-58.5 to -32.5)              |
| <b>Guatemala</b>                              | 51.9 (49.1 to 55.6)        | 47.8 (42.2 to 55.1)        | 47.0 (40.4 to 56.0)        | 42.5 (30.8 to 59.1)        | -4.9 (-2.4 to 0.5)                             | -11.7 (-30.0 to 8.1)                |
| <b>Honduras</b>                               | 42.2 (40.5 to 44.2)        | 22.7 (20.6 to 24.9)        | 21.8 (18.8 to 24.9)        | 13.2 (9.5 to 17.1)         | -3.7 (-5.2 to -2.3)                            | -42.1 (-54.0 to -29.6)              |
| <b>Mexico</b>                                 | 20.7 (19.8 to 21.7)        | 14.4 (13.7 to 15.2)        | 13.4 (12.6 to 14.3)        | 9.3 (8.2 to 10.5)          | -2.9 (-3.4 to -2.4)                            | -35.4 (-40.4 to -29.9)              |
| <b>Nicaragua</b>                              | 27.5 (26.3 to 28.9)        | 16.3 (14.4 to 18.0)        | 15.5 (13.1 to 18.0)        | 10.4 (7.3 to 14.1)         | -3.0 (-4.6 to -1.6)                            | -36.1 (-50.1 to -20.9)              |
| <b>Panama</b>                                 | 24.4 (22.6 to 26.2)        | 17.6 (14.9 to 20.2)        | 16.2 (12.6 to 19.8)        | 11.7 (7.2 to 17.5)         | -2.9 (-4.9 to -1.0)                            | -34.1 (-52.4 to -13.9)              |
| <b>Venezuela</b>                              | 18.5 (17.4 to 20.1)        | 14.1 (11.6 to 16.7)        | 13.9 (10.9 to 17.0)        | 11.6 (7.2 to 16.7)         | -1.4 (-3.3 to 0.2)                             | -18.8 (-39.4 to 2.5)                |
| <b>Tropical Latin America</b>                 |                            |                            |                            |                            |                                                |                                     |
| <b>Brazil</b>                                 | 12.8 (11.8 to 13.8)        | 10.1 (9.1 to 11.1)         | 9.7 (8.7 to 10.8)          | 7.8 (6.6 to 9.0)           | -1.7 (-2.3 to -1.1)                            | -22.7 (-29.3 to -15.6)              |
| <b>Paraguay</b>                               | 13.5 (10.3 to 16.8)        | 6.5 (5.2 to 8.1)           | 6.2 (4.8 to 7.8)           | 3.7 (2.3 to 5.7)           | -4.0 (-5.9 to -1.8)                            | -44.4 (-58.9 to -23.8)              |
| <b>North Africa and Middle East</b>           |                            |                            |                            |                            |                                                |                                     |
| <b>North Africa and Middle East</b>           |                            |                            |                            |                            |                                                |                                     |
| <b>Alghazistan</b>                            | 55.0 (53.2 to 57.0)        | 50.8 (43.5 to 61.1)        | 49.0 (41.2 to 60.1)        | 44.1 (30.6 to 64.1)        | -1.0 (-2.5 to 0.4)                             | -13.9 (-31.0 to 6.4)                |
| <b>Algeria</b>                                | 33.3 (31.8 to 35.3)        | 13.9 (12.0 to 15.8)        | 13.6 (11.4 to 15.8)        | 8.1 (5.7 to 10.8)          | -5.7 (-5.1 to -2.3)                            | -42.1 (-53.3 to -29.5)              |
| <b>Bahrain</b>                                | 12.0 (10.2 to 14.0)        | 6.9 (5.1 to 9.3)           | 6.7 (4.8 to 9.3)           | 4.8 (2.6 to 8.1)           | -2.7 (-4.9 to -0.6)                            | -32.2 (-51.7 to -9.1)               |
| <b>Egypt</b>                                  | 27.6 (26.5 to 28.7)        | 19.2 (21.1 to 24.4)        | 19.2 (17.4 to 21.2)        | 13.0 (10.9 to 15.5)        | -3.7 (-4.5 to -2.9)                            | -42.6 (-49.0 to -35.4)              |
| <b>Iran</b>                                   | 18.9 (17.6 to 20.7)        | 10.7 (7.9 to 13.7)         | 10.5 (7.3 to 13.9)         | 7.4 (3.9 to 11.9)          | -2.7 (-5.0 to -0.8)                            | -32.4 (-52.6 to -10.9)              |
| <b>Iraq</b>                                   | 29.0 (28.0 to 30.2)        | 22.6 (20.9 to 24.4)        | 21.4 (19.0 to 23.9)        | 16.1 (12.5 to 20.0)        | -2.3 (-3.6 to -1.3)                            | -28.9 (-41.3 to -17.1)              |
| <b>Jordan</b>                                 | 13.9 (12.1 to 15.7)        | 10.2 (8.4 to 12.3)         | 9.7 (7.5 to 12.3)          | 7.4 (4.5 to 11.4)          | -2.3 (-4.3 to -0.4)                            | -28.6 (-47.3 to -5.2)               |
| <b>Kuwait</b>                                 | 5.1 (4.3 to 6.2)           | 3.7 (2.8 to 4.6)           | 3.6 (2.6 to 4.7)           | 2.9 (1.6 to 4.7)           | -1.8 (-4.3 to 0.6)                             | -22.2 (-47.2 to 9.2)                |
| <b>Lebanon</b>                                | 17.5 (15.2 to 20.1)        | 13.1 (10.7 to 15.5)        | 12.6 (9.7 to 15.4)         | 9.9 (5.8 to 15.1)          | -2.0 (-4.3 to 0.1)                             | -25.2 (-47.8 to 1.6)                |
| <b>Libya</b>                                  | 21.9 (20.2 to 23.9)        | 18.7 (15.8 to 21.6)        | 18.7 (15.1 to 22.5)        | 17.4 (11.1 to 24.4)        | 4.6 (-2.4 to 0.9)                              | -7.6 (-30.7 to 14.6)                |
| <b>Morocco</b>                                | 27.2 (24.7 to 29.9)        | 16.9 (14.8 to 19.3)        | 16.3 (13.5 to 19.3)        | 11.1 (7.4 to 15.5)         | -2.9 (-4.9 to -1.2)                            | -34.9 (-51.8 to -16.8)              |
| <b>Palestine</b>                              | 15.9 (14.8 to 17.1)        | 10.9 (9.4 to 12.4)         | 10.9 (7.3 to 11.0)         | 5.2 (3.7 to 7.3)           | -5.0 (-6.4 to -3.4)                            | -52.3 (-61.8 to -39.6)              |
| <b>Oman</b>                                   | 16.7 (15.3 to 18.1)        | 15.0 (13.7 to 16.4)        | 15.0 (13.6 to 17.1)        | 14.6 (11.4 to 18.2)        | -0.2 (-1.5 to 0.9)                             | -2.9 (-20.5 to 14.9)                |
| <b>Qatar</b>                                  | 12.3 (9.2 to 16.1)         | 10.6 (7.0 to 14.9)         | 10.4 (6.7 to 14.9)         | 9.6 (4.8 to 16.3)          | -0.9 (-3.1 to 1.1)                             | -10.9 (-37.0 to 18.5)               |
| <b>Saudi Arabia</b>                           | 18.0 (15.3 to 21.0)        | 10.9 (7.6 to 15.0)         | 10.5 (7.2 to 14.4)         | 7.3 (3.9 to 12.1)          | -2.8 (-4.8 to -0.8)                            | -33.6 (-51.4 to -11.7)              |
| <b>Sudan</b>                                  | 48.8 (44.0 to 55.1)        | 39.5 (35.0 to 46.2)        | 37.6 (32.8 to 45.7)        | 30.9 (22.8 to 46.3)        | -1.7 (-3.3 to 0.1)                             | -22.2 (-39.5 to 1.6)                |
| <b>Syria</b>                                  | 32.0 (30.3 to 33.6)        | 26.9 (24.6 to 29.6)        | 26.1 (22.7 to 29.5)        | 22.2 (16.5 to 29.5)        | -1.3 (-2.7 to -0.2)                            | -17.7 (-33.0 to -2.3)               |
| <b>Tunisia</b>                                | 17.7 (16.4 to 19.0)        | 10.6 (8.8 to 12.7)         | 10.4 (8.3 to 12.7)         | 7.4 (4.9 to 10.9)          | -2.5 (-4.3 to -0.8)                            | -30.6 (-47.3 to -11.0)              |
| <b>Turkey</b>                                 | 20.7 (18.9 to 22.6)        | 12.1 (9.5 to 14.7)         | 11.5 (8.6 to 14.7)         | 7.6 (4.3 to 12.0)          | -3.3 (-5.3 to -1.3)                            | -38.0 (-55.0 to -17.2)              |
| <b>United Arab Emirates</b>                   | 16.3 (13.2 to 19.3)        | 12.8 (8.9 to 17.2)         | 12.7 (8.7 to 17.2)         | 10.8 (6.3 to 16.0)         | -1.3 (-3.1 to 0.2)                             | -16.7 (-37.1 to 3.6)                |
| <b>Yemen</b>                                  | 57.6 (54.7 to 61.1)        | 49.1 (44.4 to 54.7)        | 45.2 (39.0 to 53.5)        | 35.0 (24.3 to 50.1)        | -2.4 (-4.2 to -0.4)                            | -29.3 (-46.6 to -6.4)               |
| <b>South Asia</b>                             |                            |                            |                            |                            |                                                |                                     |
| <b>South Asia</b>                             |                            |                            |                            |                            |                                                |                                     |
| <b>Bangladesh</b>                             | 49.2 (47.3 to 51.5)        | 39.9 (36.7 to 45.3)        | 39.1 (34.5 to 47.2)        | 32.9 (24.3 to 46.7)        | -1.4 (-2.8 to 0.4)                             | -18.1 (-34.4 to 5.8)                |
| <b>Bhutan</b>                                 | 52.0 (43.9 to 61.8)        | 33.2 (29.1 to 40.2)        | 32.1 (26.9 to 41.2)        | 22.2 (14.7 to 36.5)        | -2.8 (-4.9 to -0.6)                            | -33.7 (-51.9 to -9.3)               |
| <b>India</b>                                  | 55.8 (54.5 to 57.0)        | 41.9 (41.4 to 42.4)        | 39.3 (38.7 to 40.1)        | 27.6 (26.3 to 29.2)        | -2.8 (-3.0 to -2.5)                            | -34.0 (-36.7 to -30.8)              |
| <b>Nepal</b>                                  | 57.9 (51.4 to 64.8)        | 34.0 (30.3 to 41.2)        | 33.5 (29.7 to 41.6)        | 21.3 (16.0 to 33.8)        | -3.2 (-4.7 to -1.2)                            | -37.7 (-50.3 to -16.0)              |
| <b>Pakistan</b>                               | 51.4 (46.0 to 57.9)        | 44.8 (41.3 to 49.5)        | 44.0 (39.5 to 50.7)        | 38.8 (29.9 to 51.6)        | -1.0 (-2.4 to 0.5)                             | -13.8 (-29.8 to 7.2)                |
| <b>Southeast Asia, East Asia, and Oceania</b> |                            |                            |                            |                            |                                                |                                     |
| <b>East Asia</b>                              |                            |                            |                            |                            |                                                |                                     |
| <b>China</b>                                  | 17.0 (11.7 to 22.5)        | 11.1 (7.5 to 15.1)         | 10.8 (7.3 to 14.7)         | 8.2 (4.5 to 13.1)          | -2.2 (-4.4 to -0.1)                            | -26.8 (-48.6 to -1.3)               |
| <b>North Korea</b>                            | 49.3 (45.5 to 54.3)        | 25.6 (23.4 to 28.1)        | 24.5 (21.7 to 27.8)        | 16.4 (12.3 to 21.8)        | -3.0 (-4.5 to -1.4)                            | -36.0 (-49.2 to -18.8)              |
| <b>Taiwan (Province of China)</b>             | 9.6 (6.1 to 13.9)          | 7.6 (4.7 to 11.3)          | 7.5 (4.5 to 11.3)          | 6.9 (3.1 to 12.4)          | -0.9 (-3.6 to 1.6)                             | -10.9 (-42.1 to 27.8)               |
| <b>Oceania</b>                                |                            |                            |                            |                            |                                                |                                     |
| <b>American Samoa</b>                         | 12.6 (8.0 to 18.0)         | 11.4 (7.4 to 16.2)         | 11.1 (7.2 to 15.8)         | 10.5 (5.6 to 17.1)         | -0.7 (-3.0 to 1.2)                             | -9.1 (-36.4 to 20.5)                |
| <b>Federated States of Micronesia</b>         | 18.3 (12.7 to 24.6)        | 15.6 (10.8 to 20.8)        | 15.3 (10.4 to 20.8)        | 14.0 (7.8 to 21.4)         | -0.9 (-3.0 to 1.0)                             | -10.9 (-36.4 to 16.3)               |
| <b>Fiji</b>                                   | 8.7 (5.4 to 12.5)          | 7.9 (4.8 to 11.5)          | 7.7 (4.7 to 11.4)          | 7.3 (3.4 to 13.7)          | -0.8 (-3.6 to 1.9)                             | -9.3 (-42.1 to 32.8)                |
| <b>Guam</b>                                   | 9.9 (6.1 to 14.7)          | 9.2 (6.0 to 13.1)          | 8.9 (5.8 to 12.9)          | 8.6 (4.4 to 14.5)          | -0.6 (-3.2 to 1.6)                             | -7.6 (-38.5 to 27.1)                |
| <b>Kiribati</b>                               | 30.9 (23.8 to 40.0)        | 25.6 (19.3 to 32.1)        | 24.7 (18.3 to 31.4)        | 21.2 (12.6 to 30.9)        | -1.3 (-3.2 to 0.2)                             | -17.5 (-38.1 to 3.5)                |
| <b>Marshall Islands</b>                       | 20.6 (14.6 to 27.7)        | 16.7 (11.5 to 22.6)        | 16.1 (11.1 to 22.0)        | 13.8 (7.9 to 21.6)         | -1.4 (-3.2 to 0.5)                             | -17.9 (-38.5 to 7.9)                |
| <b>Northern Mariana Islands</b>               | 9.4 (6.0 to 13.7)          | 9.9 (6.4 to 14.3)          | 9.8 (6.2 to 14.1)          | 10.4 (5.2 to 17.6)         | 0.2 (-2.4 to 2.3)                              | 4.1 (-30.1 to 42.0)                 |
| <b>Papua New Guinea</b>                       | 55.6 (48.0 to 63.1)        | 44.4 (40.2 to 50.4)        | 43.5 (38.2 to 51.4)        | 35.4 (26.5 to 49.7)        | -1.6 (-3.0 to 0.0)                             | -20.8 (-36.5 to 0.6)                |
| <b>Samoa</b>                                  | 9.9 (7.5 to 13.2)          | 10.7 (7.2 to 15.1)         | 10.6 (6.9 to 15.4)         | 11.3 (5.7 to 19.6)         | 0.2 (-1.9 to 2.2)                              | 4.1 (-25.3 to 38.7)                 |
| <b>Solomon Islands</b>                        | 30.7 (27.8 to 34.4)        | 27.4 (23.6 to 31.3)        | 26.4 (21.7 to 31.3)        | 23.1 (15.4 to 31.9)        | -1.3 (-2.9 to 0.3)                             | -16.6 (-35.4 to 4.1)                |
| <b>Tonga</b>                                  | 13.3 (9.7 to 17.0)         | 10.6 (9.6 to 11.6)         | 10.2 (8.5 to 11.9)         | 8.9 (5.7 to 13.0)          | -1.3 (-3.7 to 0.9)                             | -16.2 (-42.4 to 15.0)               |
| <b>Vanuatu</b>                                | 28.1 (25.2 to 31.4)        | 27.6 (25.1 to 30.2)        | 27.2 (23.9 to 30.5)        | 26.0 (19.6 to 32.6)        | -0.5 (-1.8 to 0.7)                             | -6.3 (-23.6 to 10.5)                |
| <b>Southeast Asia</b>                         |                            |                            |                            |                            |                                                |                                     |
| <b>Cambodia</b>                               | 53.0 (49.4 to 57.8)        | 41.0 (35.8 to 49.4)        | 38.8 (32.4 to 49.6)        | 29.3 (19.4 to 48.0)        | -2.4 (-4.3 to 0.0)                             | -29.4 (-47.3 to 0.3)                |
| <b>Indonesia</b>                              | 41.1 (39.5 to 43.4)        | 36.0 (35.2 to 37.2)        | 34.3 (33.3 to 36.0)        | 28.4 (26.2 to 31.4)        | -1.6 (-2.0 to -1.1)                            | -31.2 (-26.0 to -15.0)              |
| <b>Laos</b>                                   | 60.4 (54.7 to 65.2)        | 46.0 (41.9 to 54.2)        | 44.7 (39.4 to 53.5)        | 34.2 (24.8 to 49.4)        | -2.2 (-3.7 to -0.4)                            | -27.0 (-42.6 to -5.6)               |
| <b>Malaysia</b>                               | 25.1 (22.0 to 28.8)        | 19.1 (17.0 to 21.4)        | 18.5 (16.4 to 21.0)        | 14.7 (11.8 to 18.6)        | -1.8 (-3.0 to -0.6)                            | -23.1 (-35.9 to -8.5)               |
| <b>Maldives</b>                               | 35.1 (33.0 to 37.4)        | 19.5 (16.3 to 23.0)        | 18.6 (14.8 to 23.0)        | 11.5 (7.4 to 17.1)         | -5.7 (-5.6 to -1.8)                            | -41.6 (-56.5 to -24.0)              |
| <b>Mauritius</b>                              | 16.6 (13.4 to 20.2)        | 14.6 (10.4 to 19.6)        | 14.3 (10.1 to 19.3)        | 13.0 (6.9 to 20.2)         | -0.9 (-2.9 to 0.9)                             | -11.8 (-34.8 to 13.8)               |
| <b>Myanmar</b>                                | 46.6 (41.3 to 53.9)        | 33.1 (30.6 to 37.8)        | 31.4 (28.4 to 38.3)        | 22.3 (17.3 to 34.1)        | -2.7 (-4.0 to -0.6)                            | -32.8 (-45.2 to -9.1)               |
| <b>Philippines</b>                            | 36.9 (34.5 to 40.0)        | 33.5 (30.4 to 38.1)        | 32.4 (28.2 to 39.5)        | 28.8 (21.6 to 41.0)        | -1.1 (-2.4 to 0.5)                             | -14.4 (-30.7 to 7.2)                |
| <b>Sri Lanka</b>                              | 26.8 (25.7 to 28.0)        | 15.6 (12.5 to 18.6)        | 14.9 (11.4 to 18.4)        | 9.7 (5.8 to 14.4)          | -3.3 (-5.4 to -1.6)                            | -38.5 (-55.2 to -21.2)              |
| <b>Seychelles</b>                             | 10.6 (8.1 to 13.4)         | 10.0 (8.2 to 12.0)         | 9.8 (7.7 to 12.2)          | 9.6 (5.9 to 14.3)          | -0.4 (-2.6 to 1.6)                             | -4.9 (-32.0 to 26.6)                |
| <b>Thailand</b>                               | 17.9 (16.3 to 19.7)        | 14.7 (13.0 to 16.4)        | 14.3 (12.0 to 16.7)        | 12.2 (8.7 to 16.4)         | -1.3 (-2.9 to 0.2)                             | -17.3 (-35.2 to 2.6)                |

|                                                                        | Estimate in 2000 (95% UIs) | Estimate in 2015 (95% UIs) | Estimate in 2017 (95% UIs) | Estimate in 2020 (95% UIs) | Annualised rate of change, 2015-2020 (95% UIs) | Percent change, 2015-2020 (95% UIs) |
|------------------------------------------------------------------------|----------------------------|----------------------------|----------------------------|----------------------------|------------------------------------------------|-------------------------------------|
| Timor-Leste                                                            | 63.0 (56.3 to 69.2)        | 51.0 (45.6 to 57.8)        | 49.6 (42.4 to 58.6)        | 40.6 (26.4 to 58.0)        | -1.7 (-3.8 to 0.2)                             | -21.0 (-43.6 to 3.7)                |
| Vietnam                                                                | 40.3 (37.9 to 43.5)        | 26.3 (24.9 to 27.7)        | 22.8 (20.1 to 25.4)        | 12.8 (10.2 to 16.1)        | -4.9 (-6.0 to -3.6)                            | -51.5 (-59.1 to -41.3)              |
| <b>Sub-Saharan Africa</b>                                              |                            |                            |                            |                            |                                                |                                     |
| <b>Central Sub-Saharan Africa</b>                                      |                            |                            |                            |                            |                                                |                                     |
| Angola                                                                 | 55.7 (49.4 to 63.1)        | 44.8 (38.0 to 54.5)        | 42.6 (35.9 to 53.2)        | 33.1 (23.6 to 48.9)        | -2.1 (-3.8 to -0.3)                            | -26.6 (-43.1 to -9.9)               |
| Central African Republic                                               | 44.2 (41.7 to 47.8)        | 43.2 (37.5 to 53.5)        | 42.7 (35.7 to 54.7)        | 40.6 (28.8 to 60.6)        | -0.5 (-2.0 to 0.9)                             | -7.0 (-25.6 to 15.1)                |
| Congo                                                                  | 30.2 (26.9 to 34.0)        | 23.2 (21.8 to 24.8)        | 21.2 (19.3 to 23.2)        | 14.8 (11.7 to 17.9)        | -3.1 (-4.3 to -2.0)                            | -36.6 (-47.3 to -26.3)              |
| Democratic Republic of the Congo                                       | 45.5 (43.2 to 49.1)        | 45.4 (41.2 to 52.3)        | 43.6 (38.9 to 51.4)        | 40.4 (32.2 to 52.7)        | -0.8 (-1.9 to 0.3)                             | -11.4 (-24.7 to 4.1)                |
| Equatorial Guinea                                                      | 50.9 (45.0 to 58.6)        | 22.1 (20.3 to 24.0)        | 20.9 (18.1 to 23.6)        | 10.3 (7.3 to 13.8)         | -5.1 (-6.8 to -3.6)                            | -53.4 (-64.1 to -41.4)              |
| Gabon                                                                  | 31.6 (27.1 to 39.7)        | 20.4 (16.8 to 24.8)        | 19.4 (15.5 to 23.8)        | 13.6 (8.9 to 19.5)         | -2.8 (-4.5 to -1.3)                            | -33.5 (-48.8 to -17.2)              |
| <b>Eastern Sub-Saharan Africa</b>                                      |                            |                            |                            |                            |                                                |                                     |
| Burundi                                                                | 53.8 (51.2 to 57.4)        | 55.3 (47.4 to 63.4)        | 54.2 (45.0 to 64.0)        | 52.2 (36.7 to 68.8)        | -0.5 (-2.0 to 0.7)                             | -6.2 (-25.4 to 11.0)                |
| Comoros                                                                | 49.1 (43.5 to 58.0)        | 36.9 (31.1 to 47.5)        | 35.7 (29.7 to 47.1)        | 28.1 (19.1 to 45.5)        | -2.0 (-3.8 to 0.1)                             | -24.6 (-43.7 to 0.9)                |
| Djibouti                                                               | 35.4 (32.6 to 38.7)        | 33.4 (30.9 to 37.1)        | 32.7 (29.5 to 36.9)        | 30.4 (24.5 to 38.4)        | -0.7 (-1.7 to 0.3)                             | -9.2 (-22.9 to 4.6)                 |
| Eritrea                                                                | 48.2 (43.9 to 54.7)        | 42.4 (34.4 to 53.7)        | 41.2 (32.7 to 53.6)        | 35.7 (27.2 to 54.6)        | -1.3 (-3.0 to 0.3)                             | -16.6 (-36.0 to 5.2)                |
| Ethiopia                                                               | 57.8 (54.0 to 61.9)        | 45.4 (41.8 to 50.1)        | 43.8 (40.0 to 49.1)        | 34.3 (27.9 to 43.5)        | -1.9 (-2.9 to -0.8)                            | -24.7 (-35.8 to -11.2)              |
| Kenya                                                                  | 45.4 (41.4 to 49.8)        | 36.0 (32.1 to 40.3)        | 35.1 (31.1 to 39.5)        | 28.8 (23.3 to 36.2)        | -1.5 (-2.4 to -0.6)                            | -20.0 (-30.7 to -8.4)               |
| Madagascar                                                             | 54.8 (50.4 to 60.2)        | 50.6 (43.3 to 60.7)        | 49.5 (41.4 to 60.7)        | 45.4 (32.0 to 63.2)        | -0.8 (-2.3 to 0.5)                             | -10.9 (-29.3 to 7.0)                |
| Malawi                                                                 | 53.4 (50.1 to 57.5)        | 38.8 (35.6 to 43.8)        | 37.9 (33.9 to 44.7)        | 28.4 (21.6 to 39.8)        | -2.2 (-3.5 to -0.5)                            | -27.1 (-40.7 to -7.4)               |
| Mozambique                                                             | 49.7 (46.3 to 54.4)        | 37.9 (33.4 to 45.5)        | 37.0 (31.6 to 45.8)        | 29.1 (20.5 to 43.6)        | -1.9 (-3.5 to -0.1)                            | -23.8 (-40.4 to -11.1)              |
| Rwanda                                                                 | 48.5 (46.0 to 52.4)        | 44.4 (36.6 to 48.8)        | 40.4 (34.6 to 50.3)        | 35.2 (24.6 to 50.3)        | -1.2 (-2.9 to 0.7)                             | -15.8 (-35.7 to 11.3)               |
| Somalia                                                                | 39.0 (35.5 to 41.9)        | 34.3 (30.0 to 39.3)        | 33.8 (28.6 to 40.2)        | 30.7 (21.4 to 42.7)        | -0.8 (-2.4 to 0.7)                             | -11.0 (-30.0 to 10.4)               |
| South Sudan                                                            | 41.6 (38.0 to 46.3)        | 33.3 (30.2 to 38.3)        | 32.9 (28.9 to 39.4)        | 28.2 (21.4 to 38.2)        | -1.2 (-2.4 to 0.1)                             | -15.6 (-30.2 to 1.5)                |
| Tanzania                                                               | 50.6 (45.6 to 57.1)        | 38.2 (36.0 to 42.1)        | 35.8 (33.1 to 40.6)        | 25.7 (20.5 to 35.2)        | -2.7 (-4.0 to -1.1)                            | -32.8 (-45.1 to -14.6)              |
| Uganda                                                                 | 48.8 (43.3 to 57.1)        | 35.0 (30.8 to 43.2)        | 34.5 (29.7 to 44.5)        | 27.3 (19.7 to 42.0)        | -1.8 (-3.4 to 0.1)                             | -22.5 (-40.2 to 1.2)                |
| Zambia                                                                 | 56.3 (52.0 to 61.5)        | 43.7 (39.5 to 51.6)        | 41.9 (36.6 to 51.6)        | 32.2 (23.4 to 48.9)        | -2.1 (-3.7 to -0.2)                            | -26.8 (-42.2 to -2.4)               |
| <b>Southern Sub-Saharan Africa</b>                                     |                            |                            |                            |                            |                                                |                                     |
| Botswana                                                               | 32.2 (28.4 to 41.8)        | 29.2 (25.7 to 36.0)        | 28.1 (23.7 to 36.5)        | 24.3 (17.1 to 37.5)        | -1.3 (-3.0 to 0.4)                             | -17.3 (-36.6 to 6.2)                |
| Lesotho                                                                | 49.2 (45.9 to 53.8)        | 39.4 (33.0 to 51.6)        | 37.7 (31.0 to 51.6)        | 30.3 (20.7 to 51.0)        | -1.9 (-3.6 to 0.1)                             | -24.2 (-41.4 to 1.9)                |
| Namibia                                                                | 31.8 (29.3 to 35.8)        | 25.9 (23.3 to 29.2)        | 24.2 (20.8 to 27.7)        | 18.6 (13.6 to 24.1)        | -2.3 (-3.8 to -1.0)                            | -28.5 (-43.5 to -13.9)              |
| South Africa                                                           | 34.4 (32.2 to 37.3)        | 26.2 (24.4 to 28.9)        | 24.6 (22.5 to 27.7)        | 18.2 (15.0 to 23.4)        | -2.5 (-3.4 to -1.3)                            | -30.6 (-39.6 to -17.9)              |
| Swaziland                                                              | 45.0 (37.6 to 55.9)        | 34.2 (29.6 to 43.3)        | 30.4 (24.9 to 42.8)        | 21.8 (14.2 to 40.4)        | -3.3 (-5.3 to -0.3)                            | -37.6 (-54.9 to -46.6)              |
| Zimbabwe                                                               | 37.1 (33.0 to 44.6)        | 32.8 (29.8 to 37.6)        | 29.3 (25.9 to 34.9)        | 22.4 (17.4 to 32.4)        | -2.6 (-3.9 to -0.7)                            | -31.9 (-44.3 to -9.9)               |
| <b>Western Sub-Saharan Africa</b>                                      |                            |                            |                            |                            |                                                |                                     |
| Benin                                                                  | 44.5 (40.1 to 51.1)        | 41.9 (38.3 to 47.0)        | 38.2 (33.2 to 47.0)        | 31.6 (23.2 to 46.9)        | -2.0 (-3.5 to 0.0)                             | -25.0 (-40.8 to 0.5)                |
| Burkina Faso                                                           | 49.7 (47.3 to 53.3)        | 29.2 (28.1 to 30.4)        | 27.6 (26.1 to 29.2)        | 16.2 (14.1 to 18.6)        | -3.9 (-4.7 to -3.2)                            | -44.4 (-50.4 to -38.1)              |
| Cameroon                                                               | 45.8 (41.2 to 54.3)        | 31.8 (29.5 to 36.3)        | 30.7 (27.9 to 35.9)        | 22.3 (17.4 to 31.0)        | -2.4 (-3.8 to -0.8)                            | -30.1 (-43.6 to -11.7)              |
| Cape Verde                                                             | 22.4 (18.4 to 27.2)        | 12.3 (8.4 to 17.0)         | 11.7 (7.8 to 16.4)         | 7.4 (4.0 to 12.4)          | -3.6 (-5.7 to -1.6)                            | -40.7 (-57.8 to -21.9)              |
| Chad                                                                   | 49.5 (44.8 to 56.0)        | 43.0 (39.8 to 48.0)        | 42.4 (39.0 to 48.2)        | 38.0 (31.2 to 48.1)        | -0.9 (-2.0 to 0.2)                             | -11.7 (-25.4 to 3.6)                |
| Cote d'Ivoire                                                          | 43.4 (38.5 to 52.1)        | 32.8 (28.5 to 41.4)        | 30.4 (25.8 to 40.8)        | 22.0 (15.2 to 38.0)        | -2.8 (-4.6 to -0.2)                            | -33.4 (-49.9 to -2.9)               |
| The Gambia                                                             | 31.7 (29.8 to 34.5)        | 22.6 (20.9 to 24.5)        | 22.3 (19.9 to 27.1)        | 17.2 (13.3 to 21.2)        | -1.9 (-3.0 to -0.8)                            | -24.0 (-36.5 to -11.3)              |
| Ghana                                                                  | 35.8 (33.2 to 40.1)        | 22.2 (20.2 to 24.4)        | 19.7 (17.0 to 22.4)        | 15.5 (8.5 to 14.9)         | -4.4 (-5.9 to -3.1)                            | -48.3 (-58.4 to -37.6)              |
| Guinea                                                                 | 41.5 (39.0 to 44.8)        | 34.7 (31.3 to 41.0)        | 32.4 (28.3 to 40.8)        | 25.9 (19.3 to 40.2)        | -2.0 (-3.4 to -0.1)                            | -25.9 (-40.1 to -11.5)              |
| Guinea-Bissau                                                          | 43.9 (38.9 to 52.3)        | 28.1 (26.1 to 32.0)        | 26.5 (24.0 to 30.7)        | 17.1 (13.1 to 22.2)        | -3.4 (-4.8 to -2.0)                            | -39.3 (-51.2 to -25.8)              |
| Liberia                                                                | 53.3 (47.6 to 61.1)        | 35.8 (31.0 to 44.9)        | 33.7 (28.6 to 44.0)        | 22.9 (16.0 to 40.0)        | -3.1 (-4.7 to -0.7)                            | -36.8 (-50.8 to -9.6)               |
| Mali                                                                   | 41.5 (39.1 to 46.0)        | 31.7 (29.4 to 35.4)        | 31.7 (29.1 to 35.8)        | 27.7 (23.9 to 35.8)        | -0.9 (-1.9 to 0.2)                             | -12.9 (-25.1 to 2.5)                |
| Mauritania                                                             | 38.1 (36.3 to 40.9)        | 26.7 (26.0 to 27.5)        | 29.2 (27.9 to 30.6)        | 26.3 (23.9 to 28.6)        | -0.1 (-0.6 to 0.3)                             | -1.7 (-8.8 to 4.7)                  |
| Niger                                                                  | 59.1 (53.4 to 65.6)        | 49.2 (43.0 to 57.3)        | 47.5 (39.8 to 58.5)        | 39.0 (25.7 to 59.4)        | -1.7 (-3.6 to 0.3)                             | -21.5 (-41.8 to 4.8)                |
| Nigeria                                                                | 60.8 (55.8 to 64.3)        | 43.5 (41.7 to 45.9)        | 38.1 (36.4 to 40.9)        | 22.5 (19.9 to 26.5)        | -4.4 (-5.1 to -3.6)                            | -48.2 (-53.2 to -41.8)              |
| Sao Tome and Principe                                                  | 35.0 (32.5 to 39.0)        | 19.9 (18.1 to 21.7)        | 17.9 (15.5 to 20.3)        | 10.0 (7.5 to 13.0)         | -4.7 (-6.0 to -3.4)                            | -50.2 (-59.6 to -39.7)              |
| Senegal                                                                | 33.7 (30.8 to 39.1)        | 22.4 (20.7 to 24.2)        | 21.1 (18.9 to 23.3)        | 14.6 (11.9 to 18.0)        | -2.9 (-4.1 to -1.8)                            | -34.9 (-45.6 to -23.2)              |
| Sierra Leone                                                           | 47.6 (43.0 to 53.5)        | 38.9 (35.3 to 44.6)        | 37.1 (32.7 to 45.0)        | 29.8 (22.1 to 43.8)        | -1.9 (-3.3 to -0.1)                            | -23.8 (-39.4 to -11.1)              |
| Togo                                                                   | 33.6 (31.1 to 36.2)        | 26.2 (23.7 to 28.6)        | 24.8 (21.1 to 28.4)        | 19.1 (13.3 to 25.2)        | -2.2 (-3.8 to -0.8)                            | -27.3 (-43.9 to -10.7)              |
| <b>Indicator 2.2.2a: Prevalence of wasting in children under 5 (%)</b> |                            |                            |                            |                            |                                                |                                     |
| <b>Central Europe, Eastern Europe, and Central Asia</b>                |                            |                            |                            |                            |                                                |                                     |
| <b>Central Asia</b>                                                    |                            |                            |                            |                            |                                                |                                     |
| Armenia                                                                | 2.7 (2.2 to 3.3)           | 3.5 (2.9 to 4.3)           | 3.6 (2.9 to 4.4)           | 4.3 (2.8 to 5.9)           | 1.2 (-0.7 to 2.8)                              | 20.5 (-9.3 to 51.1)                 |
| Azerbaijan                                                             | 4.2 (3.7 to 4.7)           | 4.3 (3.5 to 5.1)           | 4.3 (3.4 to 5.3)           | 4.6 (2.9 to 6.6)           | 0.3 (-1.5 to 1.8)                              | 5.7 (-20.1 to 31.9)                 |
| Georgia                                                                | 2.7 (2.2 to 3.4)           | 2.0 (1.5 to 2.6)           | 2.0 (1.4 to 2.6)           | 1.7 (1.1 to 2.5)           | -1.3 (-3.0 to 0.5)                             | -17.1 (-36.0 to 7.1)                |
| Kazakhstan                                                             | 3.7 (3.0 to 4.4)           | 2.7 (2.3 to 3.2)           | 2.5 (2.1 to 3.0)           | 1.9 (1.3 to 2.6)           | -2.6 (-4.0 to -1.1)                            | -31.5 (-45.3 to -15.7)              |
| Kyrgyzstan                                                             | 2.2 (1.8 to 2.6)           | 1.8 (1.6 to 2.1)           | 1.8 (1.5 to 2.2)           | 1.8 (1.2 to 2.5)           | 0.3 (-2.3 to 1.4)                              | -3.8 (-28.1 to 23.1)                |
| Mongolia                                                               | 4.5 (4.0 to 4.9)           | 1.4 (1.2 to 1.8)           | 1.4 (1.1 to 1.7)           | 0.8 (0.6 to 1.1)           | -4.1 (-5.9 to -2.5)                            | -45.3 (-56.0 to -31.1)              |
| Tajikistan                                                             | 8.2 (8.0 to 8.5)           | 10.6 (9.7 to 11.6)         | 10.4 (9.3 to 11.6)         | 10.2 (8.4 to 12.5)         | -0.2 (-1.0 to 0.6)                             | -3.4 (-14.0 to 9.9)                 |
| Turkmenistan                                                           | 7.4 (7.2 to 7.6)           | 3.7 (3.2 to 4.2)           | 2.9 (2.4 to 3.4)           | 1.3 (1.0 to 1.7)           | -6.9 (-7.7 to -5.9)                            | -64.3 (-68.3 to -58.6)              |
| Uzbekistan                                                             | 8.0 (6.6 to 9.6)           | 4.8 (3.6 to 6.2)           | 4.5 (3.3 to 6.0)           | 3.2 (1.8 to 4.9)           | -2.9 (-4.7 to -1.1)                            | -34.4 (-50.5 to -15.7)              |
| <b>Central Europe</b>                                                  |                            |                            |                            |                            |                                                |                                     |
| Albania                                                                | 9.5 (7.9 to 11.2)          | 7.3 (6.2 to 8.7)           | 7.1 (5.7 to 8.6)           | 6.0 (3.9 to 8.7)           | -1.4 (-3.2 to 0.2)                             | -18.4 (-37.8 to 3.3)                |
| Bosnia and Herzegovina                                                 | 5.1 (4.5 to 5.8)           | 2.1 (1.6 to 2.6)           | 2.0 (1.6 to 2.6)           | 2.0 (0.8 to 1.9)           | -3.7 (-5.3 to -2.0)                            | -42.2 (-55.1 to -26.2)              |
| Bulgaria                                                               | 3.4 (2.4 to 4.7)           | 2.8 (2.0 to 3.8)           | 2.7 (1.9 to 3.8)           | 2.4 (1.4 to 4.0)           | -1.0 (-2.9 to 1.1)                             | -12.9 (-35.3 to 18.6)               |
| Croatia                                                                | 2.9 (2.0 to 4.0)           | 2.4 (1.7 to 3.2)           | 2.3 (1.6 to 3.2)           | 2.1 (1.2 to 3.4)           | -0.8 (-2.8 to 1.1)                             | -10.8 (-34.7 to 18.7)               |
| Czech Republic                                                         | 3.0 (2.4 to 3.6)           | 2.8 (2.0 to 3.6)           | 2.7 (2.0 to 3.6)           | 2.7 (1.6 to 4.1)           | 0.3 (-2.1 to 1.4)                              | -3.8 (-27.3 to 24.2)                |
| Hungary                                                                | 3.1 (2.2 to 4.3)           | 2.5 (1.8 to 3.4)           | 2.4 (1.7 to 3.4)           | 2.2 (1.3 to 3.5)           | -1.0 (-2.9 to 1.0)                             | -13.2 (-35.6 to 15.5)               |
| Macedonia                                                              | 2.2 (1.7 to 2.9)           | 2.5 (1.9 to 3.2)           | 2.3 (1.8 to 3.1)           | 2.3 (1.4 to 3.6)           | -0.7 (-2.7 to 1.2)                             | -8.5 (-33.6 to 20.6)                |
| Montenegro                                                             | 3.7 (2.7 to 5.0)           | 2.6 (2.0 to 3.4)           | 2.5 (1.9 to 3.3)           | 2.0 (1.2 to 3.2)           | -1.8 (-3.8 to 0.3)                             | -22.2 (-43.2 to 4.0)                |
| Poland                                                                 | 3.0 (2.1 to 4.3)           | 2.4 (1.7 to 3.3)           | 2.3 (1.6 to 3.2)           | 2.0 (1.2 to 3.3)           | -1.3 (-3.3 to 0.8)                             | -16.7 (-39.1 to 13.0)               |
| Romania                                                                | 4.2 (3.8 to 4.6)           | 3.5 (2.7 to 4.5)           | 3.4 (2.5 to 4.4)           | 3.0 (1.7 to 4.8)           | -1.3 (-3.2 to 0.6)                             | -17.2 (-38.3 to 9.6)                |
| Serbia                                                                 | 4.2 (3.1 to 5.2)           | 3.2 (2.6 to 3.9)           | 3.1 (2.5 to 4.0)           | 2.7 (1.7 to 4.2)           | -1.3 (-3.5 to 0.9)                             | -16.2 (-40.4 to 13.7)               |
| Slovakia                                                               | 2.8 (1.9 to 3.9)           | 2.3 (1.6 to 3.2)           | 2.3 (1.6 to 3.1)           | 2.1 (1.2 to 3.3)           | -0.8 (-2.9 to 1.1)                             | -10.7 (-35.1 to 17.3)               |
| Slovenia                                                               | 2.7 (1.9 to 3.8)           | 2.2 (1.6 to 3.1)           | 2.2 (1.6 to 3.0)           | 2.0 (1.2 to 3.4)           | -0.8 (-2.8 to 1.4)                             | -10.2 (-34.3 to 23.6)               |
| <b>Eastern Europe</b>                                                  |                            |                            |                            |                            |                                                |                                     |



|                                    | Estimate in 2000 (95% UIs) | Estimate in 2015 (95% UIs) | Estimate in 2017 (95% UIs) | Estimate in 2020 (95% UIs) | Annualised rate of change, 2015-2020 (95% UIs) | Percent change, 2015-2020 (95% UIs) |
|------------------------------------|----------------------------|----------------------------|----------------------------|----------------------------|------------------------------------------------|-------------------------------------|
| Belarus                            | 2.5 (1.9 to 3.5)           | 1.8 (1.3 to 2.5)           | 1.8 (1.3 to 2.5)           | 1.5 (0.9 to 2.6)           | -1.4 (-3.4 to 0.8)                             | -17.5 (-39.5 to -12.9)              |
| Estonia                            | 2.9 (2.0 to 3.9)           | 2.1 (1.5 to 2.9)           | 2.0 (1.4 to 2.9)           | 1.7 (1.0 to 2.9)           | -1.4 (-3.3 to 0.7)                             | -17.6 (-39.0 to -11.3)              |
| Latvia                             | 3.1 (2.2 to 4.3)           | 2.2 (1.6 to 3.0)           | 2.1 (1.5 to 3.0)           | 1.8 (1.1 to 2.9)           | -1.4 (-3.3 to 0.8)                             | -18.1 (-38.9 to -12.3)              |
| Lithuania                          | 3.0 (2.1 to 4.2)           | 2.1 (1.5 to 2.9)           | 2.1 (1.5 to 2.9)           | 1.7 (1.1 to 2.9)           | -1.5 (-3.4 to 0.7)                             | -19.0 (-40.1 to -10.2)              |
| Moldova                            | 4.6 (3.6 to 5.8)           | 2.3 (1.7 to 3.0)           | 2.2 (1.6 to 2.9)           | 1.4 (0.9 to 2.4)           | -3.2 (-5.1 to -1.1)                            | -37.7 (-53.1 to -15.4)              |
| Russia                             | 4.5 (4.0 to 5.1)           | 3.4 (2.6 to 4.4)           | 3.2 (2.4 to 4.3)           | 2.7 (1.6 to 4.4)           | -1.6 (-3.3 to 0.3)                             | -20.3 (-38.9 to 4.6)                |
| Ukraine                            | 6.7 (5.5 to 8.1)           | 4.6 (3.4 to 6.0)           | 4.5 (3.2 to 5.9)           | 3.6 (2.1 to 5.5)           | -1.8 (-3.7 to 0.1)                             | -22.5 (-42.3 to 1.2)                |
| <b>High-income</b>                 |                            |                            |                            |                            |                                                |                                     |
| <b>Australasia</b>                 |                            |                            |                            |                            |                                                |                                     |
| Australia                          | 1.0 (0.7 to 1.4)           | 1.0 (0.7 to 1.3)           | 0.9 (0.7 to 1.3)           | 0.9 (0.6 to 1.4)           | -0.3 (-2.3 to 1.5)                             | -4.1 (-29.0 to 24.4)                |
| New Zealand                        | 1.1 (0.8 to 1.4)           | 1.0 (0.7 to 1.4)           | 1.0 (0.7 to 1.4)           | 1.0 (0.6 to 1.6)           | -0.4 (-2.4 to 1.5)                             | -5.4 (-30.1 to 25.5)                |
| <b>High-income Asia Pacific</b>    |                            |                            |                            |                            |                                                |                                     |
| Bhunei                             | 3.4 (2.3 to 4.8)           | 3.4 (2.5 to 4.7)           | 3.3 (2.3 to 4.6)           | 3.2 (1.8 to 5.2)           | -0.5 (-2.7 to 1.5)                             | -6.7 (-33.7 to 25.4)                |
| Japan                              | 3.3 (3.1 to 3.5)           | 3.1 (2.9 to 3.2)           | 3.0 (2.9 to 3.2)           | 2.9 (2.7 to 3.2)           | -0.3 (-0.7 to 0.0)                             | -4.6 (-9.4 to 0.7)                  |
| South Korea                        | 1.2 (0.8 to 1.7)           | 1.2 (0.8 to 1.7)           | 1.2 (0.7 to 1.7)           | 1.2 (0.7 to 1.9)           | -0.2 (-2.3 to 1.8)                             | -2.5 (-29.4 to 31.6)                |
| Singapore                          | 4.7 (3.9 to 5.6)           | 3.3 (2.4 to 4.4)           | 3.2 (2.3 to 4.4)           | 2.6 (1.6 to 4.2)           | -1.6 (-3.4 to 0.3)                             | -20.0 (-39.5 to 4.8)                |
| <b>High-income North America</b>   |                            |                            |                            |                            |                                                |                                     |
| Canada                             | 0.9 (0.7 to 1.3)           | 0.8 (0.6 to 1.1)           | 0.8 (0.6 to 1.1)           | 0.8 (0.5 to 1.3)           | -0.4 (-2.5 to 1.6)                             | -4.8 (-31.0 to 26.5)                |
| Greenland                          | 1.3 (0.9 to 1.8)           | 1.1 (0.8 to 1.5)           | 1.1 (0.8 to 1.5)           | 1.0 (0.6 to 1.5)           | -0.6 (-2.6 to 1.5)                             | -7.7 (-32.0 to 25.8)                |
| United States                      | 0.5 (0.4 to 0.6)           | 0.4 (0.3 to 0.5)           | 0.4 (0.3 to 0.5)           | 0.3 (0.2 to 0.6)           | -1.3 (-3.3 to 0.8)                             | -17.2 (-39.3 to 13.0)               |
| <b>Southern Latin America</b>      |                            |                            |                            |                            |                                                |                                     |
| Argentina                          | 3.8 (3.6 to 4.0)           | 2.5 (2.0 to 2.8)           | 2.3 (1.8 to 2.8)           | 1.6 (1.1 to 2.4)           | -2.8 (-4.2 to -1.4)                            | -34.0 (-46.5 to -19.1)              |
| Chile                              | 1.2 (1.1 to 1.4)           | 1.0 (0.8 to 1.1)           | 0.8 (0.7 to 1.1)           | 0.6 (0.4 to 0.9)           | -3.4 (-4.9 to -1.6)                            | -39.1 (-52.3 to -21.6)              |
| Uruguay                            | 1.6 (1.4 to 1.9)           | 1.5 (1.1 to 1.9)           | 1.4 (1.1 to 1.9)           | 1.3 (0.8 to 2.1)           | -0.8 (-2.6 to 1.0)                             | -11.1 (-32.0 to 16.4)               |
| <b>Western Europe</b>              |                            |                            |                            |                            |                                                |                                     |
| Andorra                            | 0.9 (0.6 to 1.3)           | 0.8 (0.6 to 1.1)           | 0.8 (0.6 to 1.1)           | 0.8 (0.5 to 1.3)           | -0.2 (-2.3 to 1.8)                             | -1.5 (-29.2 to 31.7)                |
| Austria                            | 1.0 (0.7 to 1.4)           | 0.9 (0.7 to 1.3)           | 0.9 (0.7 to 1.3)           | 0.9 (0.5 to 1.5)           | -0.5 (-2.4 to 1.6)                             | -5.4 (-29.8 to 26.2)                |
| Belgium                            | 1.0 (0.7 to 1.3)           | 0.9 (0.6 to 1.2)           | 0.9 (0.6 to 1.2)           | 0.8 (0.5 to 1.4)           | -0.4 (-2.4 to 1.6)                             | -4.1 (-30.5 to 26.4)                |
| Cyprus                             | 1.1 (0.8 to 1.5)           | 0.9 (0.7 to 1.3)           | 0.9 (0.6 to 1.3)           | 0.9 (0.5 to 1.4)           | -0.2 (-2.1 to 1.6)                             | -2.6 (-27.0 to 27.0)                |
| Denmark                            | 0.9 (0.6 to 1.2)           | 0.8 (0.6 to 1.1)           | 0.8 (0.6 to 1.1)           | 0.8 (0.5 to 1.3)           | -0.2 (-2.1 to 1.8)                             | -2.1 (-27.3 to 31.4)                |
| Finland                            | 1.0 (0.7 to 1.3)           | 0.9 (0.6 to 1.2)           | 0.9 (0.6 to 1.2)           | 0.8 (0.5 to 1.3)           | -0.4 (-2.3 to 1.8)                             | -4.1 (-29.7 to 30.7)                |
| France                             | 1.0 (0.7 to 1.4)           | 0.9 (0.7 to 1.3)           | 0.9 (0.6 to 1.2)           | 0.9 (0.5 to 1.4)           | -0.4 (-2.3 to 1.5)                             | -5.4 (-29.0 to 24.3)                |
| Germany                            | 0.6 (0.4 to 0.8)           | 0.5 (0.4 to 0.7)           | 0.5 (0.4 to 0.7)           | 0.5 (0.3 to 0.8)           | -0.3 (-2.3 to 1.9)                             | -2.5 (-29.6 to 33.9)                |
| Greece                             | 1.1 (0.8 to 1.5)           | 1.0 (0.7 to 1.4)           | 1.0 (0.7 to 1.4)           | 1.0 (0.6 to 1.5)           | -0.1 (-2.0 to 1.8)                             | -0.1 (-26.1 to 30.1)                |
| Iceland                            | 0.9 (0.7 to 1.3)           | 0.8 (0.6 to 1.1)           | 0.8 (0.5 to 1.1)           | 0.8 (0.5 to 1.3)           | -0.4 (-2.2 to 1.5)                             | -5.2 (-28.6 to 26.1)                |
| Ireland                            | 1.0 (0.7 to 1.4)           | 0.9 (0.6 to 1.2)           | 0.9 (0.6 to 1.2)           | 0.8 (0.5 to 1.3)           | -0.6 (-2.6 to 1.4)                             | -7.3 (-31.9 to 23.3)                |
| Israel                             | 1.1 (0.8 to 1.5)           | 1.0 (0.7 to 1.4)           | 1.0 (0.6 to 1.4)           | 1.0 (0.6 to 1.6)           | -0.3 (-2.1 to 1.6)                             | -3.6 (-27.5 to 26.8)                |
| Italy                              | 1.0 (0.7 to 1.4)           | 0.9 (0.7 to 1.3)           | 0.9 (0.7 to 1.3)           | 0.9 (0.6 to 1.6)           | -0.1 (-2.0 to 1.7)                             | -0.7 (-25.6 to 30.0)                |
| Luxembourg                         | 0.9 (0.7 to 1.3)           | 0.8 (0.6 to 1.2)           | 0.8 (0.6 to 1.2)           | 0.8 (0.5 to 1.2)           | -0.3 (-2.2 to 1.7)                             | -2.9 (-28.0 to 28.3)                |
| Malta                              | 1.1 (0.8 to 1.5)           | 1.0 (0.7 to 1.3)           | 1.0 (0.7 to 1.3)           | 0.9 (0.6 to 1.5)           | -0.5 (-2.4 to 1.4)                             | -6.9 (-29.8 to 22.8)                |
| Netherlands                        | 0.9 (0.7 to 1.3)           | 0.8 (0.6 to 1.1)           | 0.8 (0.6 to 1.1)           | 0.8 (0.5 to 1.3)           | -0.3 (-2.3 to 1.6)                             | -3.6 (-28.7 to 27.1)                |
| Norway                             | 0.9 (0.7 to 1.3)           | 0.8 (0.6 to 1.2)           | 0.8 (0.6 to 1.1)           | 0.8 (0.5 to 1.3)           | -0.4 (-2.2 to 1.6)                             | -4.5 (-27.9 to 27.8)                |
| Portugal                           | 1.3 (0.9 to 1.8)           | 1.1 (0.8 to 1.5)           | 1.1 (0.8 to 1.5)           | 1.0 (0.6 to 1.6)           | -0.6 (-2.5 to 1.3)                             | -7.8 (-31.3 to 22.1)                |
| Spain                              | 1.6 (1.1 to 2.1)           | 1.4 (1.0 to 1.9)           | 1.4 (0.9 to 1.9)           | 1.3 (0.8 to 2.1)           | -0.6 (-2.7 to 1.3)                             | -7.5 (-33.6 to 21.6)                |
| Sweden                             | 1.0 (0.7 to 1.4)           | 0.9 (0.7 to 1.2)           | 0.9 (0.7 to 1.2)           | 0.9 (0.5 to 1.4)           | -0.4 (-2.3 to 1.3)                             | -5.0 (-28.8 to 22.0)                |
| Switzerland                        | 0.9 (0.7 to 1.3)           | 0.9 (0.6 to 1.2)           | 0.9 (0.6 to 1.2)           | 0.8 (0.5 to 1.4)           | -0.3 (-2.2 to 1.7)                             | -3.6 (-28.3 to 28.4)                |
| United Kingdom                     | 1.1 (0.8 to 1.5)           | 0.9 (0.7 to 1.3)           | 0.9 (0.7 to 1.3)           | 0.9 (0.5 to 1.4)           | -0.5 (-2.4 to 1.5)                             | -6.0 (-29.8 to 25.4)                |
| <b>Latin America and Caribbean</b> |                            |                            |                            |                            |                                                |                                     |
| <b>Andean Latin America</b>        |                            |                            |                            |                            |                                                |                                     |
| Bolivia                            | 2.1 (1.9 to 2.3)           | 1.4 (1.2 to 1.6)           | 1.4 (1.1 to 1.6)           | 1.1 (0.7 to 1.5)           | -2.1 (-3.8 to -0.4)                            | -26.2 (-43.1 to -6.4)               |
| Ecuador                            | 3.0 (2.9 to 3.2)           | 1.9 (1.6 to 2.3)           | 1.8 (1.4 to 2.2)           | 1.3 (0.8 to 2.0)           | -2.5 (-4.2 to -0.8)                            | -30.6 (-46.4 to -12.0)              |
| Peru                               | 2.0 (1.8 to 2.2)           | 1.0 (0.9 to 1.1)           | 0.8 (0.7 to 1.0)           | 0.5 (0.4 to 0.7)           | -4.5 (-6.1 to -2.7)                            | -48.5 (-59.8 to -33.4)              |
| <b>Caribbean</b>                   |                            |                            |                            |                            |                                                |                                     |
| Antigua and Barbuda                | 2.3 (1.7 to 3.2)           | 2.0 (1.4 to 2.6)           | 2.0 (1.4 to 2.7)           | 1.9 (1.1 to 3.0)           | -0.5 (-2.5 to 1.5)                             | -6.8 (-31.4 to 25.8)                |
| The Bahamas                        | 2.0 (1.4 to 2.8)           | 1.8 (1.3 to 2.5)           | 1.8 (1.3 to 2.5)           | 1.8 (1.1 to 2.9)           | -0.1 (-1.9 to 2.7)                             | -0.4 (-24.7 to 27.7)                |
| Barbados                           | 2.3 (1.6 to 3.1)           | 2.0 (1.4 to 2.7)           | 1.9 (1.4 to 2.7)           | 1.9 (1.1 to 3.1)           | -0.5 (-2.4 to 1.6)                             | -5.9 (-29.9 to 26.7)                |
| Belize                             | 3.1 (2.4 to 3.9)           | 2.3 (2.1 to 2.5)           | 2.3 (1.9 to 2.6)           | 2.3 (1.9 to 2.6)           | -0.2 (-1.3 to 0.8)                             | -2.3 (-18.2 to 12.5)                |
| Bermuda                            | 1.9 (1.3 to 2.6)           | 1.7 (1.2 to 2.3)           | 1.7 (1.2 to 2.3)           | 1.6 (1.0 to 2.6)           | -0.2 (-2.0 to 1.8)                             | -2.1 (-25.7 to 30.7)                |
| Cuba                               | 2.6 (2.4 to 2.7)           | 2.0 (1.6 to 2.4)           | 1.9 (1.5 to 2.3)           | 1.6 (1.0 to 2.4)           | -1.5 (-3.1 to 0.2)                             | -19.6 (-37.4 to 2.5)                |
| Dominica                           | 2.8 (2.0 to 3.8)           | 2.2 (1.5 to 3.0)           | 2.1 (1.5 to 3.0)           | 1.9 (1.1 to 3.2)           | -1.1 (-3.0 to 1.0)                             | -14.3 (-36.4 to 16.9)               |
| Dominican Republic                 | 2.3 (2.1 to 2.5)           | 2.1 (1.9 to 2.4)           | 2.1 (1.8 to 2.5)           | 2.0 (1.4 to 2.9)           | -0.4 (-2.0 to 1.3)                             | -4.6 (-26.3 to 21.7)                |
| Grenada                            | 3.0 (2.1 to 4.2)           | 2.4 (1.7 to 3.3)           | 2.3 (1.6 to 3.2)           | 2.0 (1.2 to 3.2)           | -1.2 (-3.1 to 0.7)                             | -15.4 (-36.8 to 11.8)               |
| Guyana                             | 11.3 (10.8 to 11.9)        | 6.3 (5.5 to 7.1)           | 6.2 (5.3 to 7.1)           | 4.2 (3.1 to 5.4)           | -2.7 (-3.9 to -1.6)                            | -33.3 (-44.1 to -21.2)              |
| Haiti                              | 7.5 (7.1 to 8.0)           | 4.5 (4.3 to 4.7)           | 4.2 (3.9 to 4.5)           | 2.8 (2.4 to 3.3)           | -5.1 (-4.0 to -2.2)                            | -37.3 (-45.5 to -27.9)              |
| Jamaica                            | 2.9 (2.5 to 3.4)           | 2.3 (1.8 to 2.9)           | 2.2 (1.7 to 2.9)           | 1.8 (1.1 to 2.9)           | -1.7 (-3.4 to 0.0)                             | -21.7 (-39.7 to 0.4)                |
| Puerto Rico                        | 1.9 (1.3 to 2.6)           | 1.6 (1.2 to 2.2)           | 1.6 (1.1 to 2.2)           | 1.5 (0.9 to 2.5)           | -0.6 (-2.6 to 1.5)                             | -6.9 (-32.1 to 26.1)                |
| Saint Lucia                        | 3.3 (2.4 to 4.4)           | 2.5 (1.8 to 3.3)           | 2.4 (1.8 to 3.3)           | 2.1 (1.2 to 3.2)           | -1.4 (-3.3 to 0.7)                             | -17.8 (-38.7 to 10.6)               |
| Saint Vincent and the Grenadines   | 3.3 (2.2 to 4.6)           | 2.6 (1.8 to 3.5)           | 2.3 (1.4 to 3.4)           | 2.3 (1.4 to 3.4)           | -1.0 (-2.9 to 0.8)                             | -13.2 (-34.9 to 13.3)               |
| Suriname                           | 5.8 (5.0 to 6.6)           | 4.4 (3.6 to 5.2)           | 4.2 (3.4 to 5.2)           | 3.5 (2.2 to 5.2)           | -1.5 (-3.4 to 0.3)                             | -19.7 (-39.6 to 4.8)                |
| Trinidad and Tobago                | 4.7 (3.8 to 5.7)           | 3.4 (2.5 to 4.4)           | 3.3 (2.4 to 4.5)           | 2.8 (1.7 to 4.5)           | -1.3 (-3.1 to 0.8)                             | -16.4 (-36.7 to 12.4)               |
| Virgin Islands, U.S.               | 1.9 (1.3 to 2.6)           | 1.7 (1.2 to 2.3)           | 1.6 (1.2 to 2.3)           | 1.6 (0.9 to 2.5)           | -0.5 (-2.5 to 1.5)                             | -6.0 (-31.7 to 25.4)                |
| <b>Central Latin America</b>       |                            |                            |                            |                            |                                                |                                     |
| Colombia                           | 1.9 (1.6 to 2.2)           | 0.9 (0.8 to 1.1)           | 0.9 (0.7 to 1.1)           | 0.6 (0.4 to 0.9)           | -3.3 (-5.1 to -1.6)                            | -38.9 (-53.4 to -20.9)              |
| Costa Rica                         | 1.9 (1.4 to 2.6)           | 1.4 (1.1 to 1.9)           | 1.4 (1.0 to 1.9)           | 1.1 (0.7 to 1.8)           | -1.7 (-3.6 to 0.3)                             | -21.7 (-41.4 to 4.0)                |
| El Salvador                        | 1.9 (1.7 to 2.0)           | 1.5 (1.3 to 1.8)           | 1.5 (1.3 to 1.8)           | 1.5 (1.0 to 2.0)           | -0.2 (-1.8 to 1.3)                             | -2.1 (-23.7 to 20.9)                |
| Guatemala                          | 3.7 (3.6 to 4.0)           | 1.1 (1.0 to 1.3)           | 1.1 (0.9 to 1.3)           | 0.5 (0.3 to 0.7)           | -5.8 (-7.2 to -4.4)                            | -58.0 (-66.1 to -48.3)              |
| Honduras                           | 2.0 (1.9 to 2.1)           | 1.3 (1.1 to 1.6)           | 1.3 (1.0 to 1.6)           | 1.0 (0.7 to 1.5)           | -1.8 (-3.5 to 0.1)                             | -23.0 (-40.7 to 0.9)                |
| Mexico                             | 3.3 (3.1 to 3.5)           | 2.0 (1.9 to 2.1)           | 1.8 (1.7 to 1.9)           | 1.1 (0.9 to 1.2)           | -4.3 (-4.7 to -3.9)                            | -47.6 (-50.9 to -44.0)              |
| Nicaragua                          | 2.4 (2.1 to 2.6)           | 1.8 (1.6 to 2.1)           | 1.8 (1.5 to 2.2)           | 1.8 (1.1 to 2.6)           | -0.4 (-2.3 to 1.4)                             | -5.3 (-29.4 to 22.6)                |
| Panama                             | 1.9 (1.6 to 2.2)           | 1.2 (0.9 to 1.5)           | 1.1 (0.9 to 1.4)           | 0.8 (0.5 to 1.3)           | -2.7 (-4.7 to -0.6)                            | -32.1 (-50.6 to -8.8)               |

|                                               | Estimate in 2000 (95% UIs) | Estimate in 2015 (95% UIs) | Estimate in 2017 (95% UIs) | Estimate in 2020 (95% UIs) | Annualised rate of change, 2015-2020 (95% UIs) | Percent change, 2015-2020 (95% UIs) |
|-----------------------------------------------|----------------------------|----------------------------|----------------------------|----------------------------|------------------------------------------------|-------------------------------------|
| Venezuela                                     | 4.3 (4.2 to 4.5)           | 5.2 (4.5 to 5.8)           | 5.1 (4.3 to 6.1)           | 5.5 (3.8 to 7.7)           | 0.3 (-1.3 to 1.9)                              | 6.2 (-17.4 to 32.6)                 |
| <b>Tropical Latin America</b>                 |                            |                            |                            |                            |                                                |                                     |
| Brazil                                        | 1.6 (1.4 to 1.7)           | 1.3 (1.2 to 1.4)           | 1.2 (1.1 to 1.3)           | 1.0 (0.9 to 1.1)           | -1.6 (-2.2 to -1.1)                            | -21.6 (-27.7 to -15.1)              |
| Paraguay                                      | 1.5 (1.3 to 1.7)           | 1.1 (1.0 to 1.3)           | 1.1 (0.9 to 1.3)           | 0.8 (0.6 to 1.2)           | -2.2 (-3.9 to -0.1)                            | -27.1 (-44.4 to -1.4)               |
| <b>North Africa and Middle East</b>           |                            |                            |                            |                            |                                                |                                     |
| <b>North Africa and Middle East</b>           |                            |                            |                            |                            |                                                |                                     |
| Afghanistan                                   | 8.3 (7.8 to 9.2)           | 5.4 (4.2 to 6.5)           | 5.1 (3.8 to 6.4)           | 3.5 (1.9 to 5.4)           | -3.1 (-5.4 to -1.1)                            | -36.3 (-55.2 to -15.3)              |
| Algeria                                       | 11.6 (11.4 to 11.8)        | 4.8 (4.2 to 5.4)           | 4.4 (3.7 to 5.0)           | 2.5 (1.9 to 3.4)           | -4.3 (-5.5 to -3.0)                            | -47.3 (-56.3 to -36.1)              |
| Bahrain                                       | 5.4 (5.0 to 5.8)           | 2.5 (2.3 to 2.7)           | 2.4 (2.2 to 2.6)           | 1.5 (1.2 to 1.8)           | -3.6 (-4.8 to -2.4)                            | -41.3 (-51.2 to -30.3)              |
| Egypt                                         | 6.7 (6.5 to 6.9)           | 5.8 (5.4 to 6.3)           | 5.5 (4.9 to 6.1)           | 4.8 (3.8 to 5.9)           | -1.3 (-2.5 to -0.2)                            | -17.7 (-30.8 to -3.1)               |
| Iran                                          | 5.4 (5.3 to 5.6)           | 4.4 (3.5 to 5.2)           | 4.4 (3.5 to 5.4)           | 4.1 (2.7 to 5.8)           | -0.6 (-2.1 to 0.9)                             | -7.8 (-27.5 to 13.9)                |
| Iraq                                          | 8.8 (8.7 to 9.0)           | 6.4 (5.9 to 6.9)           | 6.3 (5.6 to 7.0)           | 5.4 (4.1 to 6.7)           | -1.2 (-2.4 to 0.0)                             | -16.7 (-30.3 to -2.1)               |
| Jordan                                        | 2.6 (2.2 to 3.0)           | 2.2 (1.8 to 2.7)           | 2.1 (1.7 to 2.7)           | 1.9 (1.2 to 2.8)           | -1.2 (-3.1 to 0.5)                             | -16.3 (-37.1 to 7.6)                |
| Kuwait                                        | 2.1 (1.9 to 2.3)           | 2.1 (1.8 to 2.5)           | 2.0 (1.7 to 2.5)           | 2.0 (1.3 to 3.1)           | -0.2 (-2.1 to 1.7)                             | -2.4 (-27.0 to 28.4)                |
| Lebanon                                       | 4.9 (3.9 to 5.9)           | 3.7 (3.0 to 4.6)           | 3.6 (2.8 to 4.6)           | 2.9 (1.7 to 4.8)           | -1.9 (-4.1 to 0.5)                             | -24.0 (-45.8 to 7.7)                |
| Libya                                         | 4.6 (4.0 to 5.1)           | 5.3 (4.3 to 6.4)           | 5.3 (4.2 to 6.7)           | 5.9 (3.6 to 8.9)           | 0.5 (-1.5 to 2.3)                              | 9.5 (-19.6 to 42.1)                 |
| Morocco                                       | 7.6 (7.0 to 8.4)           | 3.1 (2.6 to 3.8)           | 2.8 (2.3 to 3.6)           | 1.5 (1.0 to 2.1)           | -5.1 (-6.3 to -3.7)                            | -53.1 (-61.0 to -42.5)              |
| Palestine                                     | 5.2 (5.0 to 5.6)           | 2.6 (2.2 to 2.9)           | 2.2 (1.9 to 2.6)           | 1.4 (1.0 to 1.8)           | -4.3 (-5.7 to -2.8)                            | -47.1 (-57.6 to -34.3)              |
| Oman                                          | 9.9 (9.4 to 10.6)          | 7.8 (7.5 to 8.2)           | 7.7 (7.2 to 8.2)           | 6.5 (5.6 to 7.7)           | -1.2 (-2.2 to -0.3)                            | -16.8 (-27.6 to -4.6)               |
| Qatar                                         | 2.7 (2.3 to 3.3)           | 2.7 (2.0 to 3.5)           | 2.6 (1.9 to 3.5)           | 2.7 (1.6 to 4.4)           | 0.0 (-1.8 to 1.8)                              | 1.0 (-23.2 to 31.4)                 |
| Saudi Arabia                                  | 3.5 (2.6 to 4.5)           | 3.4 (1.7 to 5.2)           | 2.3 (1.7 to 3.2)           | 1.9 (1.1 to 3.0)           | -1.6 (-3.5 to 0.3)                             | -20.8 (-40.9 to 4.4)                |
| Sudan                                         | 27.1 (25.4 to 28.9)        | 15.3 (13.4 to 17.2)        | 14.2 (12.2 to 16.3)        | 8.5 (6.1 to 11.2)          | -4.0 (-5.4 to -2.6)                            | -44.5 (-55.3 to -32.4)              |
| Syria                                         | 7.0 (6.6 to 7.4)           | 11.3 (10.1 to 12.5)        | 11.4 (9.9 to 13.0)         | 13.8 (10.4 to 17.4)        | 1.3 (0.2 to 2.3)                               | 21.5 (2.5 to 41.5)                  |
| Tunisia                                       | 4.0 (3.8 to 4.4)           | 1.9 (1.6 to 2.3)           | 2.0 (1.6 to 2.5)           | 1.5 (1.0 to 2.2)           | -1.6 (-3.3 to 0.1)                             | -20.8 (-39.4 to 0.9)                |
| Turkey                                        | 1.5 (1.3 to 1.9)           | 1.0 (0.7 to 1.3)           | 1.0 (0.7 to 1.3)           | 0.8 (0.5 to 1.2)           | -1.7 (-3.5 to 0.2)                             | -21.4 (-40.7 to 3.2)                |
| United Arab Emirates                          | 12.1 (11.0 to 13.3)        | 8.8 (6.9 to 11.0)          | 8.6 (6.6 to 10.9)          | 7.3 (4.9 to 10.1)          | -1.3 (-2.6 to -0.1)                            | -17.2 (-32.2 to -1.4)               |
| Yemen                                         | 15.3 (14.7 to 15.9)        | 14.9 (14.4 to 15.3)        | 15.7 (14.8 to 16.6)        | 17.0 (15.2 to 18.7)        | 0.9 (0.3 to 1.4)                               | 14.4 (4.7 to 23.0)                  |
| <b>South Asia</b>                             |                            |                            |                            |                            |                                                |                                     |
| <b>South Asia</b>                             |                            |                            |                            |                            |                                                |                                     |
| Bangladesh                                    | 13.3 (13.0 to 13.5)        | 12.6 (12.1 to 13.1)        | 12.4 (11.6 to 13.2)        | 12.0 (10.4 to 13.8)        | -0.3 (-1.1 to 0.4)                             | -4.5 (-15.0 to 6.3)                 |
| Bhutan                                        | 4.1 (3.4 to 4.8)           | 4.0 (3.4 to 4.7)           | 3.8 (3.0 to 4.6)           | 3.4 (2.2 to 5.1)           | -1.2 (-3.3 to 0.9)                             | -15.2 (-38.9 to 14.1)               |
| India                                         | 19.2 (18.9 to 19.6)        | 16.2 (16.1 to 16.3)        | 15.7 (15.6 to 15.9)        | 13.4 (13.1 to 13.8)        | -1.2 (-1.4 to -1.1)                            | -16.9 (-19.0 to -14.9)              |
| Nepal                                         | 9.6 (9.0 to 10.2)          | 7.2 (6.7 to 7.8)           | 7.1 (6.4 to 7.8)           | 5.5 (4.5 to 6.8)           | -1.8 (-2.7 to -0.8)                            | -23.3 (-33.6 to -11.5)              |
| Pakistan                                      | 9.0 (8.2 to 9.8)           | 12.9 (12.2 to 13.6)        | 12.2 (11.3 to 13.1)        | 12.4 (10.7 to 14.3)        | -0.3 (-1.1 to 0.5)                             | -3.7 (-15.1 to 8.3)                 |
| <b>Southeast Asia, East Asia, and Oceania</b> |                            |                            |                            |                            |                                                |                                     |
| <b>East Asia</b>                              |                            |                            |                            |                            |                                                |                                     |
| China                                         | 3.0 (2.1 to 4.1)           | 1.9 (1.4 to 2.7)           | 1.9 (1.4 to 2.6)           | 1.4 (0.8 to 2.3)           | -2.1 (-4.0 to -0.3)                            | -26.5 (-45.1 to -3.7)               |
| North Korea                                   | 11.8 (11.5 to 12.1)        | 5.4 (4.6 to 6.1)           | 5.3 (4.4 to 6.2)           | 4.0 (2.9 to 5.2)           | -2.1 (-3.3 to -0.8)                            | -26.3 (-39.5 to -11.2)              |
| Taiwan (Province of China)                    | 2.1 (1.5 to 2.9)           | 1.6 (1.2 to 2.3)           | 1.6 (1.2 to 2.3)           | 1.4 (0.8 to 2.4)           | -1.0 (-3.1 to 1.1)                             | -12.4 (-36.8 to 18.4)               |
| <b>Oceania</b>                                |                            |                            |                            |                            |                                                |                                     |
| American Samoa                                | 4.6 (3.3 to 6.3)           | 4.3 (3.1 to 5.8)           | 4.2 (3.0 to 5.8)           | 4.1 (2.4 to 6.4)           | -0.3 (-2.2 to 1.4)                             | -4.0 (-28.6 to 23.9)                |
| Federated States of Micronesia                | 6.3 (4.6 to 8.2)           | 5.4 (3.9 to 7.1)           | 5.3 (3.8 to 7.0)           | 4.9 (3.0 to 7.6)           | -0.7 (-2.8 to 1.1)                             | -8.8 (-31.6 to 18.6)                |
| Fiji                                          | 7.9 (6.9 to 9.0)           | 6.8 (5.2 to 8.6)           | 6.7 (5.0 to 8.6)           | 5.9 (3.6 to 9.3)           | -1.0 (-2.8 to 0.8)                             | -13.1 (-34.1 to 12.6)               |
| Guam                                          | 3.8 (2.8 to 5.2)           | 3.6 (2.5 to 4.9)           | 3.5 (2.5 to 4.9)           | 3.5 (2.1 to 5.6)           | -0.3 (-2.1 to 1.6)                             | -3.8 (-27.0 to 26.6)                |
| Kiribati                                      | 10.9 (8.6 to 13.6)         | 9.4 (7.3 to 11.8)          | 9.1 (7.0 to 11.6)          | 8.2 (5.4 to 11.8)          | -1.0 (-2.5 to 0.5)                             | -13.3 (-31.6 to 7.5)                |
| Marshall Islands                              | 7.2 (5.3 to 9.4)           | 5.8 (4.2 to 7.5)           | 5.7 (4.1 to 7.4)           | 5.0 (3.1 to 7.5)           | -1.1 (-2.7 to 0.6)                             | -14.4 (-33.3 to 10.1)               |
| Northern Mariana Islands                      | 3.8 (2.9 to 5.1)           | 3.8 (2.7 to 5.1)           | 3.8 (2.7 to 5.2)           | 4.0 (2.3 to 6.4)           | 0.2 (-1.7 to 2.1)                              | 4.6 (-22.2 to 36.9)                 |
| Papua New Guinea                              | 17.2 (15.9 to 18.6)        | 12.7 (11.3 to 14.3)        | 11.8 (10.1 to 13.7)        | 9.2 (6.5 to 12.5)          | -2.2 (-3.7 to -0.7)                            | -27.9 (-42.2 to -10.3)              |
| Samoa                                         | 2.4 (1.9 to 3.0)           | 2.7 (2.0 to 3.7)           | 2.7 (1.9 to 3.7)           | 2.9 (1.8 to 4.6)           | 0.4 (-1.3 to 2.1)                              | 6.4 (-18.0 to 37.2)                 |
| Solomon Islands                               | 6.2 (5.2 to 7.5)           | 5.2 (4.1 to 6.5)           | 5.1 (3.9 to 6.5)           | 4.5 (2.8 to 6.5)           | -1.1 (-2.8 to 0.6)                             | -14.7 (-34.4 to 8.9)                |
| Tonga                                         | 7.3 (5.8 to 8.9)           | 5.9 (5.3 to 6.6)           | 5.8 (5.0 to 6.6)           | 5.2 (3.8 to 7.0)           | -0.9 (-2.5 to 0.7)                             | -12.1 (-31.5 to 11.8)               |
| Vanuatu                                       | 7.2 (6.0 to 8.5)           | 5.8 (4.7 to 7.2)           | 5.7 (4.5 to 7.2)           | 5.0 (3.3 to 7.5)           | -1.0 (-2.7 to 0.8)                             | -13.8 (-33.4 to 10.8)               |
| <b>Southeast Asia</b>                         |                            |                            |                            |                            |                                                |                                     |
| Cambodia                                      | 15.0 (13.9 to 16.1)        | 9.2 (8.3 to 10.1)          | 8.8 (7.6 to 9.9)           | 6.1 (4.5 to 7.8)           | -2.8 (-4.1 to -1.6)                            | -34.0 (-45.8 to -21.6)              |
| Indonesia                                     | 14.9 (14.4 to 15.5)        | 13.2 (12.9 to 13.6)        | 12.7 (12.3 to 13.1)        | 10.7 (10.0 to 11.4)        | -1.4 (-1.8 to -1.1)                            | -19.1 (-23.2 to -15.3)              |
| Laos                                          | 6.7 (6.4 to 7.2)           | 6.1 (5.4 to 6.8)           | 6.0 (5.2 to 7.0)           | 5.5 (4.1 to 7.4)           | -0.7 (-2.0 to 0.7)                             | -9.5 (-26.1 to 10.7)                |
| Malaysia                                      | 9.3 (8.1 to 10.6)          | 9.5 (8.7 to 10.2)          | 9.6 (8.8 to 10.4)          | 9.9 (8.3 to 11.7)          | 0.3 (-0.7 to 1.2)                              | 4.2 (-10.1 to 19.8)                 |
| Maldives                                      | 16.7 (15.7 to 17.7)        | 9.2 (7.9 to 10.8)          | 8.9 (7.3 to 10.6)          | 5.8 (4.0 to 7.9)           | -3.2 (-4.7 to -1.7)                            | -38.0 (-50.5 to -23.1)              |
| Mauritius                                     | 13.1 (11.9 to 14.5)        | 11.2 (8.6 to 13.8)         | 11.0 (8.6 to 13.8)         | 9.9 (6.6 to 14.1)          | -0.9 (-2.3 to 0.4)                             | -12.4 (-29.5 to 6.5)                |
| Myanmar                                       | 11.4 (10.7 to 12.2)        | 7.3 (6.7 to 7.8)           | 6.9 (6.2 to 7.7)           | 4.8 (3.9 to 6.0)           | -2.7 (-3.8 to -1.7)                            | -33.4 (-43.6 to -22.4)              |
| Philippines                                   | 7.6 (7.3 to 7.9)           | 6.5 (5.8 to 7.3)           | 6.5 (5.5 to 7.5)           | 6.1 (4.3 to 8.2)           | -0.5 (-2.1 to 0.9)                             | -7.2 (-26.6 to 14.1)                |
| Sri Lanka                                     | 16.3 (15.9 to 16.9)        | 11.8 (10.4 to 13.2)        | 11.2 (9.4 to 13.1)         | 8.5 (6.0 to 11.5)          | -2.2 (-3.7 to -0.9)                            | -28.0 (-42.8 to -12.3)              |
| Seychelles                                    | 4.6 (3.6 to 5.9)           | 4.7 (3.9 to 5.6)           | 4.6 (3.7 to 5.6)           | 4.7 (3.2 to 6.6)           | -0.1 (-1.8 to 1.6)                             | -0.1 (-23.4 to 26.9)                |
| Thailand                                      | 5.7 (5.4 to 6.2)           | 6.6 (5.9 to 7.2)           | 6.7 (5.9 to 7.6)           | 8.0 (5.9 to 10.0)          | 1.2 (-0.1 to 2.4)                              | 21.0 (-1.8 to 42.6)                 |
| Timor-Leste                                   | 22.3 (20.5 to 24.1)        | 16.4 (15.2 to 17.6)        | 15.5 (13.9 to 17.2)        | 11.5 (9.2 to 14.1)         | -2.4 (-3.6 to -1.3)                            | -30.2 (-41.9 to -18.1)              |
| Vietnam                                       | 10.3 (10.2 to 10.5)        | 5.9 (5.6 to 6.2)           | 5.7 (5.2 to 6.2)           | 3.9 (3.2 to 4.7)           | -2.8 (-3.8 to -1.8)                            | -34.4 (-43.4 to -24.0)              |
| <b>Sub-Saharan Africa</b>                     |                            |                            |                            |                            |                                                |                                     |
| <b>Central Sub-Saharan Africa</b>             |                            |                            |                            |                            |                                                |                                     |
| Angola                                        | 8.6 (7.8 to 9.6)           | 5.5 (4.8 to 6.2)           | 5.2 (4.5 to 6.0)           | 3.9 (2.9 to 5.0)           | -2.4 (-3.6 to -1.1)                            | -29.5 (-41.4 to -15.7)              |
| Central African Republic                      | 9.8 (9.3 to 10.3)          | 7.2 (6.4 to 8.2)           | 7.0 (6.1 to 7.4)           | 5.6 (4.2 to 7.4)           | -1.7 (-3.0 to -0.4)                            | -22.2 (-36.1 to -6.5)               |
| Congo                                         | 5.8 (5.2 to 6.4)           | 8.4 (8.1 to 8.7)           | 8.5 (8.0 to 8.9)           | 10.7 (9.2 to 12.3)         | 1.6 (0.7 to 2.4)                               | 26.6 (11.6 to 42.7)                 |
| Democratic Republic of the Congo              | 11.2 (10.6 to 11.8)        | 7.8 (7.1 to 8.7)           | 7.2 (6.3 to 8.2)           | 5.2 (3.9 to 6.7)           | -2.8 (-4.0 to -1.5)                            | -33.7 (-45.5 to -20.6)              |
| Equatorial Guinea                             | 6.6 (5.8 to 7.3)           | 3.2 (3.0 to 3.5)           | 2.9 (2.5 to 3.3)           | 1.6 (1.2 to 2.2)           | -4.7 (-6.4 to -3.0)                            | -50.5 (-61.6 to -36.4)              |
| Gabon                                         | 2.8 (2.3 to 3.5)           | 2.7 (2.2 to 3.4)           | 2.6 (2.0 to 3.3)           | 2.3 (1.6 to 3.6)           | -1.1 (-2.7 to 0.7)                             | -14.7 (-33.2 to 11.3)               |
| <b>Eastern Sub-Saharan Africa</b>             |                            |                            |                            |                            |                                                |                                     |
| Burundi                                       | 9.1 (8.7 to 9.5)           | 7.4 (6.5 to 8.4)           | 7.3 (6.3 to 8.6)           | 6.5 (4.8 to 8.8)           | -0.9 (-2.1 to 0.3)                             | -12.5 (-27.1 to 5.1)                |
| Comoros                                       | 12.1 (10.8 to 13.3)        | 8.8 (7.6 to 10.1)          | 8.5 (7.1 to 10.1)          | 6.8 (4.8 to 9.3)           | -1.8 (-3.2 to -0.3)                            | -22.7 (-38.1 to -4.5)               |
| Djibouti                                      | 20.8 (18.9 to 22.8)        | 17.3 (16.0 to 18.7)        | 16.6 (14.9 to 18.4)        | 14.0 (11.0 to 17.3)        | -1.5 (-2.6 to -0.4)                            | -19.6 (-32.0 to -5.6)               |
| Eritrea                                       | 14.1 (13.4 to 14.9)        | 10.5 (8.7 to 12.4)         | 10.3 (8.2 to 12.4)         | 8.3 (5.5 to 11.6)          | -1.7 (-3.2 to -0.3)                            | -21.7 (-38.1 to -5.1)               |
| Ethiopia                                      | 12.4 (11.7 to 13.1)        | 9.5 (9.0 to 10.0)          | 9.2 (8.6 to 9.8)           | 7.3 (6.4 to 8.3)           | -1.7 (-2.3 to -1.1)                            | -22.8 (-29.3 to -15.4)              |

|                                                                            | Estimate in 2000 (95% UIs) | Estimate in 2015 (95% UIs) | Estimate in 2017 (95% UIs) | Estimate in 2020 (95% UIs) | Annualised rate of change, 2015-2020 (95% UIs) | Percent change, 2015-2020 (95% UIs) |
|----------------------------------------------------------------------------|----------------------------|----------------------------|----------------------------|----------------------------|------------------------------------------------|-------------------------------------|
| Kenya                                                                      | 7.2 (6.5 to 8.1)           | 5.4 (4.8 to 6.0)           | 5.2 (4.7 to 5.9)           | 4.2 (3.4 to 5.0)           | -1.7 (-2.5 to -0.9)                            | -22.6 (-31.7 to -13.2)              |
| Madagascar                                                                 | 9.8 (9.2 to 10.4)          | 9.8 (9.1 to 11.6)          | 9.6 (7.7 to 11.6)          | 9.2 (6.0 to 13.0)          | -0.5 (-2.7 to 1.0)                             | -4.6 (-27.9 to 15.5)                |
| Malawi                                                                     | 6.2 (5.8 to 6.6)           | 3.6 (3.2 to 4.0)           | 3.6 (3.1 to 4.0)           | 2.7 (2.0 to 3.4)           | -2.0 (-3.4 to -0.8)                            | -25.9 (-39.6 to -11.7)              |
| Mozambique                                                                 | 7.8 (7.3 to 8.2)           | 4.3 (3.8 to 4.8)           | 4.1 (3.5 to 4.9)           | 2.8 (2.0 to 4.0)           | -2.8 (-4.4 to -1.1)                            | -34.0 (-48.0 to -15.3)              |
| Rwanda                                                                     | 11.1 (10.7 to 11.5)        | 2.9 (2.5 to 3.3)           | 2.6 (2.3 to 3.1)           | 1.1 (0.9 to 1.5)           | -6.1 (-7.1 to -5.2)                            | -60.0 (-65.4 to -53.9)              |
| Somalia                                                                    | 17.9 (17.4 to 18.4)        | 12.8 (11.3 to 14.4)        | 12.6 (10.8 to 14.5)        | 10.1 (7.3 to 13.6)         | -1.6 (-3.0 to -0.3)                            | -21.5 (-36.7 to -3.9)               |
| South Sudan                                                                | 23.2 (21.4 to 24.9)        | 18.1 (16.5 to 19.7)        | 17.0 (15.0 to 19.2)        | 12.8 (9.9 to 16.2)         | -2.3 (-3.5 to -1.2)                            | -29.3 (-41.0 to -16.5)              |
| Tanzania                                                                   | 5.6 (5.3 to 5.8)           | 4.3 (4.1 to 4.6)           | 4.5 (4.1 to 4.9)           | 4.2 (3.4 to 5.1)           | -0.3 (-1.2 to 0.7)                             | -4.2 (-16.8 to 10.3)                |
| Uganda                                                                     | 5.0 (4.4 to 5.7)           | 3.7 (3.2 to 4.2)           | 3.5 (3.0 to 4.2)           | 2.9 (2.0 to 4.0)           | -1.7 (-3.4 to 0.0)                             | -21.7 (-39.8 to 0.1)                |
| Zambia                                                                     | 5.8 (5.5 to 6.2)           | 5.9 (5.5 to 6.3)           | 5.9 (5.3 to 6.6)           | 6.1 (4.8 to 7.6)           | 0.2 (-0.9 to 1.3)                              | 3.6 (-12.6 to 21.1)                 |
| <b>Southern Sub-Saharan Africa</b>                                         |                            |                            |                            |                            |                                                |                                     |
| Botswana                                                                   | 8.0 (7.2 to 8.9)           | 6.0 (5.0 to 7.2)           | 5.9 (4.7 to 7.2)           | 4.8 (3.1 to 7.2)           | -1.5 (-3.2 to 0.1)                             | -19.9 (-37.9 to 1.8)                |
| Lesotho                                                                    | 3.6 (3.4 to 3.9)           | 2.2 (1.9 to 2.7)           | 2.4 (1.9 to 2.9)           | 2.2 (1.6 to 3.2)           | 0.0 (-1.4 to 1.3)                              | 0.6 (-19.4 to 21.3)                 |
| Namibia                                                                    | 8.8 (8.0 to 9.7)           | 8.4 (7.6 to 9.2)           | 8.0 (6.9 to 9.1)           | 7.2 (5.5 to 9.4)           | -1.1 (-2.3 to 0.3)                             | -14.6 (-29.7 to 4.1)                |
| South Africa                                                               | 5.2 (4.8 to 5.7)           | 3.5 (3.2 to 3.8)           | 3.3 (3.0 to 3.6)           | 2.2 (1.9 to 2.6)           | -3.1 (-3.8 to -2.3)                            | -37.0 (-43.6 to -29.7)              |
| Swaziland                                                                  | 1.8 (1.5 to 2.2)           | 1.4 (1.1 to 1.7)           | 1.4 (1.1 to 1.7)           | 1.2 (0.8 to 1.7)           | -1.2 (-2.8 to 0.5)                             | -15.5 (-33.9 to 8.5)                |
| Zimbabwe                                                                   | 5.2 (4.6 to 5.8)           | 2.8 (2.5 to 3.2)           | 2.6 (2.2 to 3.0)           | 1.7 (1.2 to 2.3)           | -3.4 (-4.7 to -2.0)                            | -39.3 (-50.6 to -26.2)              |
| <b>Western Sub-Saharan Africa</b>                                          |                            |                            |                            |                            |                                                |                                     |
| Benin                                                                      | 8.7 (8.1 to 9.3)           | 10.0 (9.3 to 10.7)         | 9.3 (8.4 to 10.3)          | 8.8 (7.2 to 10.8)          | -0.8 (-1.9 to 0.3)                             | -11.3 (-24.2 to 4.4)                |
| Burkina Faso                                                               | 17.9 (17.3 to 18.4)        | 13.8 (13.2 to 14.3)        | 12.6 (11.9 to 13.4)        | 8.7 (7.5 to 9.8)           | -3.1 (-3.8 to -2.5)                            | -37.1 (-43.3 to -31.0)              |
| Cameroun                                                                   | 6.8 (6.2 to 7.4)           | 5.0 (4.6 to 5.4)           | 4.8 (4.2 to 5.4)           | 3.8 (2.9 to 4.8)           | -2.0 (-3.2 to -0.8)                            | -25.2 (-39.2 to -10.8)              |
| Cape Verde                                                                 | 5.7 (4.8 to 6.6)           | 3.2 (2.5 to 4.4)           | 3.2 (2.3 to 4.2)           | 2.2 (1.3 to 3.5)           | -3.0 (-4.7 to -1.2)                            | -35.3 (-50.5 to -17.0)              |
| Chad                                                                       | 14.9 (14.0 to 15.8)        | 14.1 (13.1 to 15.1)        | 13.7 (12.5 to 14.9)        | 12.4 (10.5 to 14.5)        | -0.9 (-1.7 to -0.1)                            | -11.9 (-22.3 to -1.2)               |
| Cote d'Ivoire                                                              | 7.8 (7.0 to 8.6)           | 6.2 (5.4 to 7.2)           | 6.0 (5.0 to 7.1)           | 5.0 (3.5 to 6.9)           | -1.5 (-3.1 to 0.1)                             | -19.8 (-37.5 to -1.0)               |
| The Gambia                                                                 | 9.2 (8.3 to 10.2)          | 9.9 (9.1 to 10.8)          | 10.1 (8.9 to 11.4)         | 11.6 (9.0 to 14.3)         | 1.0 (-0.2 to 2.0)                              | 16.1 (-3.2 to 35.0)                 |
| Ghana                                                                      | 10.1 (9.5 to 10.6)         | 7.3 (6.8 to 8.2)           | 6.7 (5.8 to 7.7)           | 4.8 (3.6 to 6.3)           | -2.9 (-4.2 to -1.6)                            | -34.6 (-46.6 to -21.6)              |
| Guinea                                                                     | 10.4 (9.9 to 11.0)         | 7.6 (6.8 to 8.4)           | 7.6 (6.6 to 8.6)           | 6.5 (4.8 to 8.2)           | -1.1 (-2.5 to 0.0)                             | -15.3 (-30.9 to 0.7)                |
| Guinea-Bissau                                                              | 9.1 (8.1 to 10.1)          | 6.8 (6.3 to 7.3)           | 6.4 (5.7 to 7.2)           | 4.8 (3.8 to 6.2)           | -2.3 (-3.6 to -1.1)                            | -28.9 (-41.9 to -14.8)              |
| Liberia                                                                    | 7.0 (5.9 to 8.0)           | 5.5 (4.7 to 6.4)           | 5.3 (4.3 to 6.3)           | 4.4 (3.0 to 6.2)           | -1.5 (-3.1 to 0.1)                             | -19.9 (-37.5 to 1.0)                |
| Mali                                                                       | 14.9 (14.1 to 15.7)        | 11.4 (10.9 to 12.0)        | 12.4 (11.6 to 13.2)        | 12.4 (10.6 to 13.6)        | 0.4 (-0.0 to 0.9)                              | 7.0 (-0.6 to 14.3)                  |
| Mauritania                                                                 | 24.4 (23.1 to 26.0)        | 24.3 (23.7 to 24.9)        | 26.6 (26.0 to 27.3)        | 29.4 (28.3 to 30.6)        | 1.3 (1.1 to 1.5)                               | 21.1 (17.5 to 24.4)                 |
| Niger                                                                      | 17.5 (16.3 to 18.7)        | 16.5 (15.2 to 17.8)        | 15.9 (14.1 to 17.6)        | 14.7 (11.5 to 17.7)        | -0.8 (-1.9 to 0.2)                             | -11.1 (-25.3 to 2.4)                |
| Nigeria                                                                    | 11.7 (10.8 to 12.6)        | 10.2 (9.7 to 10.8)         | 10.1 (9.5 to 10.7)         | 9.2 (8.2 to 10.2)          | -0.7 (-1.3 to -0.2)                            | -10.3 (-17.4 to -3.0)               |
| Sao Tome and Principe                                                      | 8.2 (7.5 to 9.0)           | 6.6 (5.8 to 7.4)           | 5.6 (4.7 to 6.5)           | 3.7 (2.7 to 4.9)           | -3.9 (-5.1 to -2.6)                            | -44.4 (-53.8 to -32.3)              |
| Senegal                                                                    | 8.8 (8.0 to 9.7)           | 8.4 (7.8 to 9.0)           | 7.8 (7.1 to 8.6)           | 6.7 (5.5 to 7.9)           | -1.6 (-2.5 to -0.6)                            | -20.8 (-31.3 to -9.1)               |
| Sierra Leone                                                               | 11.1 (10.3 to 12.0)        | 7.7 (6.9 to 8.5)           | 7.5 (6.5 to 8.5)           | 5.9 (4.5 to 7.5)           | -1.8 (-3.1 to -0.6)                            | -23.5 (-37.0 to -8.8)               |
| Togo                                                                       | 8.9 (8.2 to 9.5)           | 8.9 (8.6 to 9.2)           | 10.0 (9.5 to 10.5)         | 11.7 (10.9 to 12.5)        | 1.8 (1.5 to 2.1)                               | 31.7 (25.8 to 38.0)                 |
| <b>Indicator 2.2.2b: Prevalence of overweight in children aged 2-4 (%)</b> |                            |                            |                            |                            |                                                |                                     |
| <b>Central Europe, Eastern Europe, and Central Asia</b>                    |                            |                            |                            |                            |                                                |                                     |
| <b>Central Asia</b>                                                        |                            |                            |                            |                            |                                                |                                     |
| Armenia                                                                    | 24.7 (20.4 to 29.0)        | 32.9 (27.7 to 38.8)        | 33.5 (27.8 to 40.4)        | 41.0 (30.3 to 53.9)        | 1.4 (0.2 to 2.5)                               | 24.4 (3.4 to 44.9)                  |
| Azerbaijan                                                                 | 16.1 (12.6 to 20.1)        | 33.5 (27.1 to 40.5)        | 34.1 (27.5 to 41.4)        | 45.6 (33.7 to 58.3)        | 2.0 (1.0 to 2.9)                               | 36.0 (16.0 to 54.7)                 |
| Georgia                                                                    | 26.9 (23.0 to 31.1)        | 33.8 (27.9 to 40.8)        | 34.4 (28.3 to 42.1)        | 38.4 (26.9 to 51.2)        | 0.8 (-0.4 to 1.9)                              | 13.1 (-6.3 to 32.8)                 |
| Kazakhstan                                                                 | 18.4 (15.9 to 20.8)        | 26.2 (21.9 to 31.2)        | 27.0 (22.2 to 32.5)        | 33.2 (24.2 to 44.6)        | 1.5 (0.3 to 2.6)                               | 26.4 (4.1 to 48.2)                  |
| Kyrgyzstan                                                                 | 20.6 (17.4 to 23.8)        | 16.8 (13.4 to 20.6)        | 17.2 (13.5 to 21.5)        | 15.8 (10.1 to 23.2)        | -0.5 (-2.3 to 1.1)                             | -6.7 (-28.9 to 17.7)                |
| Mongolia                                                                   | 22.9 (19.2 to 27.0)        | 23.5 (19.7 to 27.8)        | 24.1 (19.7 to 28.8)        | 26.3 (17.7 to 36.1)        | 0.7 (-0.9 to 2.0)                              | 11.2 (-12.7 to 36.0)                |
| Tajikistan                                                                 | 13.3 (10.5 to 16.6)        | 15.5 (12.4 to 18.7)        | 15.9 (12.6 to 19.7)        | 18.0 (11.6 to 25.6)        | 0.9 (-0.9 to 2.5)                              | 14.8 (-13.2 to 44.7)                |
| Turkmenistan                                                               | 23.7 (17.8 to 30.5)        | 29.8 (22.9 to 37.0)        | 30.8 (23.7 to 38.2)        | 36.5 (24.3 to 48.7)        | 1.3 (-0.2 to 2.5)                              | 22.0 (-2.6 to 44.9)                 |
| Uzbekistan                                                                 | 29.2 (26.1 to 32.2)        | 27.2 (22.3 to 32.9)        | 28.0 (22.6 to 34.2)        | 28.4 (19.1 to 40.2)        | 0.2 (-1.2 to 1.5)                              | 3.7 (-16.7 to 25.8)                 |
| <b>Central Europe</b>                                                      |                            |                            |                            |                            |                                                |                                     |
| Albania                                                                    | 48.3 (45.0 to 51.8)        | 32.6 (27.2 to 38.0)        | 32.5 (19.0 to 39.3)        | 27.5 (19.0 to 37.9)        | -1.2 (-2.5 to 0.1)                             | -16.2 (-31.6 to 1.2)                |
| Bosnia and Herzegovina                                                     | 27.1 (23.9 to 30.6)        | 30.5 (26.2 to 35.6)        | 30.6 (25.2 to 36.4)        | 32.8 (23.6 to 44.0)        | 0.4 (-1.0 to 1.6)                              | 7.0 (-13.7 to 26.7)                 |
| Bulgaria                                                                   | 26.3 (19.9 to 33.0)        | 29.3 (22.3 to 36.6)        | 30.1 (22.8 to 37.3)        | 34.0 (22.8 to 47.3)        | 0.9 (-0.6 to 2.3)                              | 15.6 (-8.5 to 40.9)                 |
| Croatia                                                                    | 24.8 (18.9 to 31.5)        | 30.2 (23.6 to 38.1)        | 30.6 (23.9 to 38.0)        | 35.3 (24.2 to 47.7)        | 1.0 (-0.4 to 2.3)                              | 16.5 (-6.5 to 41.8)                 |
| Czech Republic                                                             | 27.2 (20.4 to 34.3)        | 28.6 (22.1 to 35.5)        | 28.9 (22.2 to 35.9)        | 32.3 (21.6 to 44.5)        | 0.8 (-0.8 to 2.2)                              | 12.7 (-11.3 to 40.0)                |
| Hungary                                                                    | 27.0 (20.5 to 34.2)        | 27.8 (21.4 to 35.0)        | 28.2 (21.7 to 35.7)        | 30.2 (19.5 to 42.7)        | 0.5 (-1.2 to 1.9)                              | 8.5 (-16.2 to 33.1)                 |
| Macedonia                                                                  | 22.8 (18.9 to 27.6)        | 26.5 (22.1 to 31.6)        | 26.9 (21.8 to 32.2)        | 30.5 (20.8 to 41.3)        | 0.9 (-0.7 to 2.1)                              | 14.6 (-10.4 to 37.7)                |
| Montenegro                                                                 | 25.2 (21.3 to 29.8)        | 35.5 (31.3 to 39.8)        | 36.2 (31.4 to 41.0)        | 45.4 (35.1 to 55.4)        | 1.6 (0.6 to 2.5)                               | 27.7 (8.8 to 45.1)                  |
| Poland                                                                     | 20.4 (15.2 to 26.7)        | 23.6 (17.9 to 30.2)        | 24.1 (18.1 to 30.6)        | 27.6 (18.1 to 40.0)        | 1.0 (-0.6 to 2.5)                              | 16.6 (-8.8 to 45.4)                 |
| Romania                                                                    | 24.2 (18.2 to 31.2)        | 27.1 (20.3 to 34.8)        | 27.8 (21.0 to 35.5)        | 32.3 (21.4 to 45.3)        | 1.1 (-0.3 to 2.5)                              | 19.1 (-4.9 to 46.2)                 |
| Serbia                                                                     | 24.1 (20.2 to 28.2)        | 23.0 (20.1 to 26.1)        | 23.1 (19.6 to 26.7)        | 22.0 (15.7 to 29.6)        | -0.4 (-1.8 to 1.1)                             | -4.8 (-23.9 to 17.4)                |
| Slovakia                                                                   | 21.1 (15.8 to 27.8)        | 29.0 (22.5 to 36.3)        | 29.5 (22.5 to 36.8)        | 36.8 (25.0 to 49.5)        | 1.6 (0.2 to 2.8)                               | 27.0 (3.0 to 52.3)                  |
| Slovenia                                                                   | 27.6 (21.1 to 34.9)        | 32.9 (25.2 to 40.7)        | 33.3 (25.4 to 41.0)        | 38.6 (26.4 to 51.1)        | 1.0 (-0.4 to 2.3)                              | 17.0 (-6.5 to 40.9)                 |
| <b>Eastern Europe</b>                                                      |                            |                            |                            |                            |                                                |                                     |
| Belarus                                                                    | 14.3 (11.7 to 17.7)        | 20.9 (16.5 to 26.1)        | 21.6 (16.8 to 27.2)        | 28.6 (18.6 to 40.2)        | 2.0 (0.4 to 3.2)                               | 35.5 (6.8 to 62.0)                  |
| Estonia                                                                    | 18.1 (13.1 to 23.8)        | 26.9 (20.5 to 33.7)        | 27.3 (20.7 to 34.3)        | 34.8 (24.4 to 46.9)        | 1.7 (0.4 to 2.9)                               | 29.3 (5.6 to 55.6)                  |
| Latvia                                                                     | 14.8 (10.8 to 19.5)        | 21.2 (15.7 to 27.4)        | 21.7 (16.2 to 28.1)        | 26.9 (17.5 to 38.8)        | 1.5 (-0.1 to 3.0)                              | 26.8 (-1.4 to 56.4)                 |
| Lithuania                                                                  | 11.5 (8.5 to 15.1)         | 20.1 (15.0 to 25.9)        | 20.4 (15.3 to 26.4)        | 27.5 (18.2 to 38.5)        | 2.0 (0.5 to 3.4)                               | 36.0 (8.1 to 66.9)                  |
| Moldova                                                                    | 7.8 (5.7 to 10.2)          | 9.7 (7.5 to 12.2)          | 10.1 (7.8 to 12.8)         | 12.7 (7.9 to 18.9)         | 1.7 (-0.3 to 3.6)                              | 30.7 (-3.9 to 70.9)                 |
| Russia                                                                     | 23.0 (18.6 to 28.0)        | 25.0 (19.1 to 31.3)        | 25.3 (19.1 to 32.1)        | 27.6 (17.7 to 38.9)        | 0.6 (-1.1 to 1.9)                              | 9.7 (-14.6 to 32.2)                 |
| Ukraine                                                                    | 13.0 (9.3 to 17.5)         | 16.4 (11.9 to 21.5)        | 16.5 (11.9 to 21.7)        | 19.3 (11.9 to 29.2)        | 1.0 (-0.9 to 2.7)                              | 17.4 (-13.0 to 49.9)                |
| <b>High-income</b>                                                         |                            |                            |                            |                            |                                                |                                     |
| <b>Australasia</b>                                                         |                            |                            |                            |                            |                                                |                                     |
| Australia                                                                  | 18.2 (15.4 to 21.3)        | 23.9 (19.1 to 29.4)        | 24.4 (19.1 to 30.2)        | 30.2 (20.1 to 41.7)        | 1.5 (0.2 to 2.7)                               | 25.8 (2.3 to 50.0)                  |
| New Zealand                                                                | 26.4 (20.2 to 32.9)        | 31.4 (25.3 to 38.0)        | 31.9 (25.5 to 38.5)        | 37.4 (26.5 to 49.4)        | 1.1 (-0.4 to 2.4)                              | 18.8 (-5.2 to 42.4)                 |
| <b>High-income Asia Pacific</b>                                            |                            |                            |                            |                            |                                                |                                     |
| Brunei                                                                     | 12.6 (9.1 to 16.9)         | 21.5 (15.8 to 27.8)        | 21.8 (16.1 to 28.2)        | 29.4 (19.4 to 41.6)        | 2.0 (0.5 to 3.5)                               | 36.4 (8.0 to 68.7)                  |
| Japan                                                                      | 10.6 (8.4 to 13.0)         | 13.9 (10.5 to 17.5)        | 14.2 (10.7 to 18.1)        | 17.5 (10.5 to 26.0)        | 1.5 (-0.3 to 3.0)                              | 25.7 (-3.8 to 57.6)                 |
| South Korea                                                                | 16.5 (12.1 to 21.3)        | 25.8 (19.9 to 32.7)        | 26.3 (20.2 to 33.2)        | 32.8 (22.2 to 44.3)        | 1.6 (0.2 to 2.8)                               | 27.1 (2.4 to 53.3)                  |
| Singapore                                                                  | 11.7 (8.3 to 16.0)         | 20.6 (15.5 to 26.8)        | 21.0 (15.9 to 27.1)        | 29.5 (20.9 to 40.1)        | 2.3 (0.7 to 3.7)                               | 42.7 (11.1 to 75.0)                 |

|                                     | Estimate in 2000 (95% UIs) | Estimate in 2015 (95% UIs) | Estimate in 2017 (95% UIs) | Estimate in 2030 (95% UIs) | Annualised rate of change, 2015-2030 (95% UIs) | Percent change, 2015-2030 (95% UIs) |
|-------------------------------------|----------------------------|----------------------------|----------------------------|----------------------------|------------------------------------------------|-------------------------------------|
| <b>High-income North America</b>    |                            |                            |                            |                            |                                                |                                     |
| Canada                              | 20.3 (15.6 to 25.8)        | 26.1 (19.9 to 32.6)        | 26.4 (20.2 to 33.0)        | 31.1 (19.9 to 43.0)        | 1.1 (-0.5 to 2.5)                              | 18.7 (-7.1 to 45.2)                 |
| Greenland                           | 14.5 (10.7 to 19.3)        | 20.3 (15.2 to 26.5)        | 20.6 (15.3 to 26.8)        | 26.4 (16.6 to 37.2)        | 1.7 (0.1 to 3.2)                               | 29.6 (0.8 to 61.8)                  |
| United States                       | 20.8 (18.1 to 23.7)        | 22.9 (19.1 to 27.2)        | 23.4 (19.1 to 28.3)        | 26.2 (18.1 to 36.4)        | 0.8 (-0.6 to 2.1)                              | 13.8 (-8.7 to 36.3)                 |
| <b>Southern Latin America</b>       |                            |                            |                            |                            |                                                |                                     |
| Argentina                           | 10.6 (7.6 to 14.5)         | 13.0 (9.3 to 17.6)         | 13.4 (9.6 to 18.3)         | 17.2 (10.3 to 26.0)        | 1.8 (-0.2 to 3.5)                              | 31.6 (-2.8 to 70.1)                 |
| Chile                               | 13.4 (9.8 to 18.3)         | 21.8 (16.1 to 28.4)        | 22.3 (16.3 to 28.6)        | 30.6 (20.3 to 42.2)        | 2.2 (0.6 to 3.6)                               | 40.3 (9.9 to 70.8)                  |
| Uruguay                             | 12.4 (8.7 to 16.9)         | 18.2 (13.5 to 23.4)        | 18.8 (14.0 to 24.4)        | 25.3 (16.4 to 36.2)        | 2.1 (0.3 to 3.7)                               | 38.8 (5.2 to 74.2)                  |
| <b>Western Europe</b>               |                            |                            |                            |                            |                                                |                                     |
| Andorra                             | 31.4 (24.4 to 39.7)        | 33.7 (26.4 to 41.4)        | 33.8 (26.6 to 41.4)        | 36.3 (25.5 to 49.1)        | 0.4 (-1.0 to 1.7)                              | 7.3 (-13.4 to 28.8)                 |
| Austria                             | 24.9 (19.1 to 31.6)        | 27.2 (20.8 to 34.8)        | 27.5 (20.9 to 35.1)        | 30.8 (20.1 to 43.8)        | 0.8 (-0.8 to 2.1)                              | 12.6 (-12.0 to 36.7)                |
| Belgium                             | 24.6 (18.6 to 31.5)        | 25.6 (19.6 to 32.8)        | 25.9 (19.6 to 33.1)        | 28.3 (18.3 to 40.3)        | 0.6 (-1.1 to 2.0)                              | 9.8 (-14.7 to 35.3)                 |
| Cyprus                              | 13.7 (9.9 to 18.1)         | 24.5 (18.6 to 31.1)        | 24.6 (18.5 to 31.4)        | 31.5 (21.2 to 43.0)        | 1.6 (0.3 to 2.9)                               | 28.4 (3.9 to 54.7)                  |
| Denmark                             | 26.4 (19.9 to 33.5)        | 29.0 (21.9 to 36.5)        | 29.1 (21.7 to 36.4)        | 31.4 (20.2 to 42.9)        | 0.5 (-1.1 to 1.8)                              | 8.1 (-15.5 to 31.4)                 |
| Finland                             | 19.3 (14.5 to 24.8)        | 22.2 (16.9 to 28.1)        | 22.6 (17.2 to 28.7)        | 26.6 (17.2 to 37.6)        | 1.1 (-0.6 to 2.6)                              | 19.6 (-8.5 to 48.0)                 |
| France                              | 20.7 (15.3 to 26.8)        | 23.5 (17.8 to 30.6)        | 23.8 (18.2 to 30.8)        | 27.0 (17.0 to 38.7)        | 0.8 (-0.9 to 2.4)                              | 14.2 (-12.2 to 42.6)                |
| Germany                             | 21.3 (15.8 to 27.6)        | 25.5 (19.0 to 32.3)        | 25.9 (19.5 to 32.5)        | 30.0 (19.0 to 41.6)        | 1.0 (-0.8 to 2.4)                              | 16.9 (-10.9 to 43.2)                |
| Greece                              | 25.4 (20.2 to 31.8)        | 28.7 (22.1 to 36.0)        | 28.6 (21.9 to 35.9)        | 30.5 (20.1 to 42.7)        | 0.3 (-1.3 to 1.7)                              | 5.7 (-17.3 to 29.4)                 |
| Iceland                             | 26.9 (20.9 to 34.7)        | 32.3 (24.8 to 40.6)        | 32.7 (25.1 to 41.2)        | 37.5 (25.1 to 41.2)        | 0.9 (-0.5 to 2.2)                              | 15.7 (-6.9 to 38.8)                 |
| Ireland                             | 25.7 (20.9 to 31.5)        | 28.1 (21.6 to 34.8)        | 28.6 (21.9 to 35.5)        | 31.5 (20.5 to 44.1)        | 0.7 (-0.9 to 1.9)                              | 11.6 (-12.8 to 33.7)                |
| Israel                              | 20.2 (15.0 to 26.3)        | 22.9 (17.0 to 29.0)        | 23.3 (17.3 to 29.6)        | 26.4 (16.6 to 37.4)        | 0.9 (-0.8 to 2.4)                              | 14.6 (-11.3 to 43.3)                |
| Italy                               | 27.4 (21.2 to 34.3)        | 30.2 (23.2 to 37.8)        | 30.3 (23.4 to 38.1)        | 32.8 (22.2 to 45.4)        | 0.5 (-0.9 to 1.9)                              | 8.2 (-12.4 to 32.1)                 |
| Luxembourg                          | 29.0 (22.2 to 36.3)        | 34.0 (26.6 to 42.4)        | 34.3 (26.9 to 42.8)        | 39.0 (27.4 to 52.8)        | 0.9 (-0.5 to 2.1)                              | 14.6 (-6.8 to 37.3)                 |
| Malta                               | 22.7 (17.1 to 30.0)        | 27.2 (20.6 to 34.7)        | 27.8 (21.0 to 35.4)        | 32.6 (21.6 to 44.4)        | 1.2 (-0.4 to 2.5)                              | 19.6 (-6.3 to 44.9)                 |
| Netherlands                         | 19.5 (14.9 to 24.9)        | 22.1 (17.0 to 28.1)        | 22.5 (17.1 to 28.5)        | 26.0 (16.9 to 37.2)        | 1.0 (-0.6 to 2.5)                              | 17.0 (-9.0 to 45.3)                 |
| Norway                              | 23.1 (17.1 to 29.4)        | 27.1 (20.4 to 34.6)        | 27.4 (21.0 to 34.8)        | 31.7 (21.4 to 44.5)        | 1.0 (-0.5 to 2.4)                              | 16.8 (-7.3 to 42.8)                 |
| Portugal                            | 20.4 (15.5 to 26.3)        | 23.8 (18.0 to 30.4)        | 24.1 (18.1 to 30.9)        | 27.2 (17.5 to 39.0)        | 0.8 (-0.9 to 2.3)                              | 13.9 (-12.1 to 41.6)                |
| Spain                               | 24.3 (18.4 to 30.6)        | 26.6 (19.8 to 33.9)        | 26.8 (20.0 to 34.1)        | 29.4 (18.9 to 42.0)        | 0.6 (-1.1 to 2.0)                              | 9.8 (-15.1 to 34.7)                 |
| Sweden                              | 20.5 (15.0 to 26.5)        | 24.0 (18.4 to 30.9)        | 24.4 (18.4 to 31.2)        | 28.4 (18.4 to 40.2)        | 1.1 (-0.6 to 2.5)                              | 18.0 (-9.0 to 45.6)                 |
| Switzerland                         | 25.0 (19.3 to 31.6)        | 26.5 (20.4 to 33.5)        | 26.7 (20.7 to 33.7)        | 28.6 (18.9 to 39.8)        | 0.4 (-1.1 to 1.7)                              | 7.5 (-15.0 to 29.6)                 |
| United Kingdom                      | 23.3 (20.9 to 25.9)        | 25.6 (21.6 to 30.2)        | 25.9 (21.7 to 31.2)        | 28.3 (20.2 to 38.2)        | 0.6 (-0.8 to 1.7)                              | 9.7 (-10.9 to 29.6)                 |
| <b>Latin America and Caribbean</b>  |                            |                            |                            |                            |                                                |                                     |
| <b>Andean Latin America</b>         |                            |                            |                            |                            |                                                |                                     |
| Bolivia                             | 25.8 (21.8 to 29.9)        | 27.1 (21.5 to 33.5)        | 28.1 (22.1 to 34.7)        | 32.0 (21.4 to 44.2)        | 1.0 (-0.3 to 2.2)                              | 17.3 (-4.6 to 39.8)                 |
| Ecuador                             | 16.9 (13.8 to 20.4)        | 19.3 (15.0 to 24.1)        | 20.0 (16.2 to 24.2)        | 24.2 (16.1 to 33.3)        | 1.4 (-0.2 to 2.9)                              | 24.8 (-2.8 to 54.2)                 |
| Peru                                | 28.4 (26.3 to 30.3)        | 27.5 (21.9 to 33.9)        | 28.6 (22.7 to 35.6)        | 32.2 (21.7 to 45.0)        | 1.0 (-0.4 to 2.1)                              | 16.1 (-5.8 to 36.8)                 |
| <b>Caribbean</b>                    |                            |                            |                            |                            |                                                |                                     |
| Antigua and Barbuda                 | 15.9 (11.3 to 21.1)        | 16.6 (12.0 to 21.8)        | 17.1 (12.4 to 22.4)        | 18.8 (11.5 to 27.9)        | 0.7 (-1.2 to 2.5)                              | 12.5 (-16.0 to 45.9)                |
| The Bahamas                         | 25.7 (19.5 to 33.1)        | 23.8 (17.5 to 31.2)        | 23.9 (17.6 to 30.9)        | 23.6 (16.0 to 35.3)        | -0.2 (-1.9 to 1.5)                             | -1.5 (-24.7 to 24.5)                |
| Barbados                            | 24.1 (18.4 to 30.4)        | 20.3 (16.4 to 24.7)        | 20.6 (16.4 to 25.5)        | 19.9 (13.0 to 28.7)        | -0.2 (-2.1 to 1.5)                             | -2.2 (-26.6 to 26.1)                |
| Belize                              | 18.9 (15.8 to 22.6)        | 17.2 (13.9 to 20.6)        | 17.1 (13.6 to 21.0)        | 16.4 (10.6 to 24.0)        | -0.4 (-2.1 to 1.2)                             | -5.2 (-27.3 to 19.6)                |
| Bermuda                             | 34.6 (26.9 to 42.9)        | 33.1 (25.8 to 41.5)        | 33.4 (26.0 to 41.7)        | 33.1 (22.4 to 45.7)        | -0.1 (-1.6 to 1.3)                             | -0.4 (-20.8 to 21.5)                |
| Cuba                                | 18.7 (14.4 to 23.9)        | 23.8 (20.3 to 27.9)        | 24.7 (20.8 to 29.2)        | 29.8 (21.5 to 39.2)        | 1.4 (-0.0 to 2.8)                              | 24.8 (-0.3 to 52.1)                 |
| Dominica                            | 19.3 (14.1 to 25.8)        | 19.8 (14.5 to 26.3)        | 20.1 (14.8 to 26.7)        | 21.4 (13.0 to 33.0)        | 0.5 (-1.4 to 2.1)                              | 8.0 (-18.8 to 36.5)                 |
| Dominican Republic                  | 14.0 (11.0 to 17.4)        | 17.8 (13.1 to 23.2)        | 18.4 (13.7 to 24.6)        | 22.8 (14.3 to 33.5)        | 1.6 (0.1 to 3.1)                               | 27.3 (1.0 to 58.5)                  |
| Grenada                             | 13.7 (9.8 to 18.2)         | 13.4 (9.6 to 18.3)         | 13.8 (9.8 to 18.6)         | 14.7 (8.4 to 23.5)         | 0.5 (-1.6 to 2.3)                              | 8.3 (-21.1 to 41.6)                 |
| Guyana                              | 11.7 (9.5 to 14.3)         | 15.4 (12.2 to 19.1)        | 15.9 (12.2 to 20.1)        | 19.7 (12.2 to 29.1)        | 1.5 (-0.3 to 3.0)                              | 26.8 (-3.7 to 58.0)                 |
| Haiti                               | 7.4 (5.8 to 9.3)           | 7.7 (5.9 to 10.4)          | 7.9 (5.9 to 10.6)          | 8.5 (5.0 to 13.5)          | 0.5 (-1.5 to 2.3)                              | 8.8 (-19.9 to 41.5)                 |
| Jamaica                             | 17.3 (12.5 to 23.0)        | 17.6 (12.9 to 23.2)        | 17.7 (13.1 to 23.0)        | 18.8 (11.7 to 27.9)        | 0.4 (-1.5 to 2.0)                              | 6.6 (-19.7 to 35.3)                 |
| Puerto Rico                         | 37.7 (30.1 to 45.9)        | 43.1 (35.3 to 51.2)        | 43.3 (35.4 to 51.4)        | 47.2 (34.5 to 60.2)        | 0.6 (-0.7 to 1.6)                              | 9.4 (-9.5 to 27.2)                  |
| Saint Lucia                         | 15.3 (11.4 to 19.8)        | 11.3 (8.6 to 14.4)         | 11.6 (8.7 to 14.9)         | 10.7 (6.6 to 16.5)         | -0.5 (-2.5 to 1.5)                             | -5.6 (-31.1 to 26.1)                |
| Saint Vincent and the Grenadines    | 12.6 (8.9 to 16.9)         | 15.9 (11.7 to 21.1)        | 16.3 (11.9 to 21.6)        | 19.6 (12.2 to 29.1)        | 1.3 (-0.5 to 3.0)                              | 22.5 (-6.8 to 56.5)                 |
| Suriname                            | 9.9 (7.5 to 13.0)          | 11.0 (8.3 to 14.1)         | 11.3 (8.4 to 14.4)         | 13.7 (8.2 to 20.8)         | 1.4 (-0.6 to 3.1)                              | 23.8 (-8.3 to 59.3)                 |
| Trinidad and Tobago                 | 11.4 (8.8 to 14.6)         | 20.5 (15.3 to 26.9)        | 20.7 (15.3 to 27.3)        | 27.6 (17.3 to 39.5)        | 1.9 (0.3 to 3.2)                               | 33.9 (4.6 to 62.8)                  |
| Virgin Islands, U.S.                | 33.5 (26.0 to 41.9)        | 34.5 (26.8 to 43.3)        | 34.6 (26.8 to 43.2)        | 34.8 (23.9 to 48.0)        | -0.0 (-1.5 to 1.3)                             | 0.2 (-20.0 to 21.5)                 |
| <b>Central Latin America</b>        |                            |                            |                            |                            |                                                |                                     |
| Colombia                            | 12.2 (9.4 to 15.5)         | 12.3 (9.1 to 16.0)         | 12.8 (9.3 to 16.8)         | 14.9 (8.8 to 22.1)         | 1.2 (-0.7 to 2.8)                              | 20.1 (-10.3 to 52.4)                |
| Costa Rica                          | 23.9 (18.1 to 31.0)        | 23.5 (17.6 to 30.4)        | 24.0 (17.8 to 31.4)        | 25.9 (16.2 to 37.2)        | 0.6 (-1.3 to 2.2)                              | 9.9 (-17.4 to 39.0)                 |
| El Salvador                         | 12.4 (10.2 to 15.2)        | 14.8 (11.4 to 18.8)        | 15.3 (11.7 to 19.7)        | 18.7 (11.6 to 27.7)        | 1.4 (-0.2 to 3.0)                              | 25.2 (-2.6 to 57.4)                 |
| Guatemala                           | 17.8 (14.9 to 21.0)        | 16.1 (12.2 to 20.7)        | 16.4 (12.4 to 21.0)        | 17.0 (10.4 to 25.1)        | 0.2 (-1.5 to 1.8)                              | 4.5 (-20.6 to 31.8)                 |
| Honduras                            | 11.9 (9.4 to 15.0)         | 13.4 (10.9 to 16.8)        | 13.8 (10.8 to 17.6)        | 16.2 (10.3 to 24.8)        | 1.1 (-0.6 to 2.8)                              | 19.4 (-9.0 to 51.1)                 |
| Mexico                              | 25.4 (19.5 to 31.9)        | 25.8 (18.2 to 28.2)        | 25.2 (18.3 to 28.7)        | 22.9 (15.3 to 32.5)        | -0.1 (-1.8 to 1.5)                             | -0.4 (-23.8 to 24.7)                |
| Nicaragua                           | 15.6 (13.4 to 18.3)        | 16.8 (13.0 to 21.3)        | 17.3 (13.3 to 22.2)        | 20.1 (12.9 to 30.2)        | 1.1 (-0.6 to 2.6)                              | 18.5 (-8.1 to 47.8)                 |
| Panama                              | 14.6 (10.6 to 19.3)        | 17.9 (13.1 to 23.9)        | 18.9 (13.9 to 25.0)        | 24.4 (15.3 to 35.1)        | 2.0 (0.3 to 3.4)                               | 36.1 (5.4 to 66.7)                  |
| Venezuela                           | 21.5 (16.3 to 27.4)        | 21.6 (15.8 to 27.9)        | 22.0 (16.1 to 28.5)        | 24.3 (14.9 to 35.7)        | 0.7 (-1.0 to 2.2)                              | 12.1 (-13.4 to 39.7)                |
| <b>Tropical Latin America</b>       |                            |                            |                            |                            |                                                |                                     |
| Brazil                              | 19.2 (16.0 to 22.7)        | 29.9 (23.1 to 37.0)        | 30.7 (23.4 to 37.7)        | 40.9 (27.1 to 54.2)        | 2.0 (0.9 to 3.0)                               | 36.2 (14.2 to 57.6)                 |
| Paraguay                            | 15.9 (11.8 to 20.7)        | 21.7 (16.0 to 28.1)        | 22.5 (16.7 to 29.3)        | 29.4 (18.9 to 41.8)        | 2.0 (0.3 to 3.3)                               | 34.9 (5.2 to 63.4)                  |
| <b>North Africa and Middle East</b> |                            |                            |                            |                            |                                                |                                     |
| <b>North Africa and Middle East</b> |                            |                            |                            |                            |                                                |                                     |
| Afghanistan                         | 3.2 (2.3 to 4.5)           | 5.9 (4.1 to 8.2)           | 6.2 (4.3 to 8.5)           | 9.9 (5.9 to 15.2)          | 3.4 (1.4 to 5.1)                               | 68.2 (24.1 to 115.7)                |
| Algeria                             | 18.2 (13.1 to 24.2)        | 27.2 (20.8 to 34.8)        | 28.1 (21.5 to 35.5)        | 37.0 (25.7 to 49.1)        | 2.0 (0.6 to 3.3)                               | 35.9 (9.2 to 63.0)                  |
| Bahrain                             | 23.4 (18.0 to 29.6)        | 22.4 (17.2 to 28.4)        | 22.2 (17.7 to 29.2)        | 26.6 (17.5 to 37.5)        | 1.1 (-0.5 to 2.4)                              | 17.8 (-6.8 to 44.3)                 |
| Egypt                               | 28.2 (24.9 to 31.5)        | 31.1 (25.5 to 37.1)        | 31.9 (25.8 to 38.2)        | 35.8 (24.8 to 47.8)        | 0.9 (-0.4 to 1.9)                              | 14.6 (-5.5 to 32.9)                 |
| Iran                                | 17.3 (12.7 to 22.6)        | 23.6 (17.9 to 30.5)        | 24.1 (18.3 to 31.1)        | 29.9 (19.9 to 42.4)        | 1.5 (0.0 to 2.9)                               | 26.5 (0.7 to 54.1)                  |
| Iraq                                | 15.3 (12.4 to 18.6)        | 23.5 (18.9 to 28.4)        | 24.2 (19.3 to 29.4)        | 30.6 (20.8 to 41.9)        | 1.7 (0.2 to 2.9)                               | 29.9 (3.6 to 55.6)                  |
| Jordan                              | 12.1 (9.5 to 15.0)         | 15.6 (11.9 to 19.8)        | 16.2 (12.3 to 20.7)        | 19.6 (12.7 to 29.8)        | 1.4 (-0.2 to 3.1)                              | 25.1 (-3.3 to 59.0)                 |
| Kuwait                              | 34.5 (27.0 to 42.7)        | 43.9 (35.7 to 52.4)        | 44.5 (36.2 to 53.0)        | 51.9 (38.9 to 64.6)        | 1.1 (0.0 to 2.1)                               | 18.3 (0.2 to 37.2)                  |
| Lebanon                             | 23.1 (17.5 to 29.2)        | 23.9 (19.1 to 28.7)        | 24.6 (19.6 to 29.9)        | 28.0 (18.9 to 38.8)        | 1.0 (-0.7 to 2.5)                              | 16.9 (-9.7 to 45.0)                 |
| Libya                               | 27.0 (20.7 to 34.4)        | 28.9 (22.4 to 36.3)        | 28.1 (21.9 to 35.5)        | 28.5 (18.7 to 40.5)        | -0.2 (-1.8 to 1.3)                             | -1.8 (-23.4 to 21.1)                |

|                                               | Estimate in 2000 (95% UIs) | Estimate in 2015 (95% UIs) | Estimate in 2017 (95% UIs) | Estimate in 2030 (95% UIs) | Annualised rate of change, 2015-2030 (95% UIs) | Percent change, 2015-2030 (95% UIs) |
|-----------------------------------------------|----------------------------|----------------------------|----------------------------|----------------------------|------------------------------------------------|-------------------------------------|
| Morocco                                       | 19.4 (15.8 to 23.3)        | 23.5 (18.0 to 29.5)        | 23.9 (18.5 to 30.5)        | 27.9 (18.4 to 40.4)        | 1.2 (-0.4 to 2.5)                              | 19.8 (-6.0 to 45.6)                 |
| Palestine                                     | 15.9 (12.9 to 19.2)        | 17.5 (14.1 to 21.8)        | 18.2 (14.3 to 22.9)        | 21.7 (14.2 to 31.4)        | 1.4 (-0.3 to 2.8)                              | 23.4 (-4.5 to 52.6)                 |
| Oman                                          | 21.2 (15.9 to 27.6)        | 33.0 (25.9 to 40.7)        | 33.7 (26.7 to 41.6)        | 44.5 (31.9 to 57.9)        | 2.0 (0.7 to 3.1)                               | 34.8 (10.8 to 58.9)                 |
| Qatar                                         | 37.7 (29.5 to 46.2)        | 41.1 (32.9 to 49.3)        | 41.9 (33.7 to 50.1)        | 45.5 (32.8 to 59.2)        | 0.6 (-0.6 to 1.8)                              | 10.6 (-9.0 to 30.2)                 |
| Saudi Arabia                                  | 27.0 (20.4 to 34.5)        | 39.8 (31.3 to 48.2)        | 41.4 (32.7 to 49.9)        | 53.8 (40.2 to 66.6)        | 2.0 (1.0 to 2.9)                               | 35.5 (16.5 to 54.5)                 |
| Sudan                                         | 10.3 (8.2 to 12.5)         | 10.9 (8.6 to 14.2)         | 11.5 (8.6 to 15.0)         | 14.8 (9.0 to 21.8)         | 1.9 (0.2 to 3.4)                               | 33.7 (2.5 to 67.0)                  |
| Syria                                         | 19.8 (15.6 to 24.5)        | 27.4 (21.7 to 33.6)        | 27.8 (21.6 to 34.4)        | 33.1 (22.6 to 45.0)        | 1.2 (-0.2 to 2.4)                              | 20.2 (-3.7 to 43.9)                 |
| Tunisia                                       | 18.8 (13.7 to 24.2)        | 25.9 (19.4 to 32.9)        | 26.6 (19.9 to 33.8)        | 33.6 (22.0 to 45.8)        | 1.7 (0.2 to 3.1)                               | 29.2 (2.7 to 58.3)                  |
| Turkey                                        | 16.6 (13.4 to 20.1)        | 28.6 (22.2 to 36.1)        | 29.9 (23.1 to 37.5)        | 42.4 (29.8 to 55.8)        | 2.6 (1.5 to 3.5)                               | 48.1 (25.7 to 69.7)                 |
| United Arab Emirates                          | 23.4 (17.7 to 29.7)        | 31.5 (24.4 to 39.3)        | 31.9 (24.9 to 39.3)        | 38.3 (26.6 to 51.2)        | 1.3 (-0.2 to 2.4)                              | 21.4 (-2.8 to 44.0)                 |
| Yemen                                         | 7.8 (5.7 to 10.5)          | 9.0 (6.5 to 12.2)          | 9.1 (6.4 to 12.3)          | 10.8 (6.4 to 16.7)         | 1.1 (-0.9 to 2.9)                              | 18.8 (-13.1 to 55.2)                |
| <b>South Asia</b>                             |                            |                            |                            |                            |                                                |                                     |
| <b>South Asia</b>                             |                            |                            |                            |                            |                                                |                                     |
| Bangladesh                                    | 3.3 (2.4 to 4.6)           | 4.2 (3.0 to 5.8)           | 4.4 (3.1 to 6.1)           | 6.0 (3.3 to 9.5)           | 2.1 (0.0 to 4.2)                               | 39.8 (0.6 to 88.0)                  |
| Bhutan                                        | 7.4 (5.3 to 10.0)          | 12.8 (9.5 to 16.9)         | 13.4 (9.8 to 17.7)         | 19.3 (11.9 to 27.7)        | 2.6 (0.8 to 4.3)                               | 49.6 (12.4 to 89.2)                 |
| India                                         | 6.8 (5.0 to 9.0)           | 10.8 (7.9 to 14.0)         | 11.4 (8.5 to 14.9)         | 17.7 (11.3 to 25.2)        | 3.3 (1.6 to 4.7)                               | 64.0 (27.8 to 103.5)                |
| Nepal                                         | 3.5 (2.5 to 4.9)           | 5.0 (3.5 to 6.9)           | 5.3 (3.8 to 7.2)           | 7.6 (4.5 to 12.0)          | 2.7 (0.6 to 4.4)                               | 51.1 (10.0 to 94.0)                 |
| Pakistan                                      | 7.4 (5.5 to 9.6)           | 5.5 (4.0 to 7.3)           | 5.7 (4.2 to 7.7)           | 5.4 (3.3 to 8.4)           | -0.2 (-2.1 to 1.5)                             | -2.5 (-26.8 to 25.5)                |
| <b>Southeast Asia, East Asia, and Oceania</b> |                            |                            |                            |                            |                                                |                                     |
| <b>East Asia</b>                              |                            |                            |                            |                            |                                                |                                     |
| China                                         | 8.4 (7.8 to 9.1)           | 16.5 (15.4 to 17.5)        | 17.4 (16.3 to 18.5)        | 27.8 (25.5 to 30.1)        | 3.5 (3.1 to 3.8)                               | 68.3 (60.2 to 76.2)                 |
| North Korea                                   | 7.5 (5.2 to 10.2)          | 7.5 (5.4 to 10.2)          | 7.6 (5.6 to 10.2)          | 8.0 (6.4 to 12.7)          | 0.3 (-1.8 to 2.5)                              | 5.7 (-23.7 to 44.9)                 |
| Taiwan (Province of China)                    | 24.2 (18.3 to 31.2)        | 32.1 (24.8 to 39.1)        | 32.6 (25.2 to 39.7)        | 39.0 (27.0 to 51.1)        | 1.3 (-0.1 to 2.4)                              | 21.4 (-0.8 to 42.7)                 |
| <b>Oceania</b>                                |                            |                            |                            |                            |                                                |                                     |
| American Samoa                                | 22.6 (17.1 to 29.1)        | 27.1 (20.4 to 35.0)        | 27.4 (20.8 to 35.4)        | 31.7 (21.6 to 44.7)        | 1.0 (-0.5 to 2.3)                              | 16.6 (-7.8 to 42.0)                 |
| Federated States of Micronesia                | 12.5 (9.1 to 16.8)         | 14.7 (10.9 to 19.3)        | 15.0 (11.0 to 19.7)        | 17.7 (11.0 to 27.0)        | 1.1 (-0.7 to 3.0)                              | 19.3 (-9.5 to 55.7)                 |
| Fiji                                          | 17.2 (12.6 to 22.6)        | 21.9 (16.6 to 28.2)        | 22.4 (16.8 to 28.8)        | 27.3 (17.9 to 39.0)        | 1.4 (-0.2 to 2.9)                              | 24.4 (-2.5 to 53.9)                 |
| Guam                                          | 36.6 (28.9 to 44.9)        | 46.4 (37.8 to 55.3)        | 46.5 (38.1 to 55.2)        | 54.5 (41.0 to 68.0)        | 1.1 (0.1 to 2.0)                               | 17.4 (0.9 to 34.1)                  |
| Kiribati                                      | 9.3 (6.5 to 12.5)          | 11.6 (8.3 to 15.6)         | 11.9 (8.6 to 16.1)         | 15.1 (9.0 to 23.2)         | 1.6 (-0.4 to 3.5)                              | 29.4 (-5.4 to 69.6)                 |
| Marshall Islands                              | 9.8 (7.2 to 13.1)          | 13.0 (9.6 to 17.2)         | 13.3 (9.8 to 17.6)         | 17.4 (10.8 to 26.1)        | 1.8 (-0.1 to 3.6)                              | 32.8 (-1.9 to 71.6)                 |
| Northern Mariana Islands                      | 32.2 (25.0 to 40.3)        | 31.1 (24.2 to 38.9)        | 30.9 (23.5 to 38.7)        | 30.3 (19.6 to 43.1)        | -0.3 (-1.9 to 1.2)                             | -3.0 (-25.0 to 20.5)                |
| Papua New Guinea                              | 8.5 (6.0 to 11.7)          | 9.6 (6.9 to 13.1)          | 9.9 (7.0 to 13.5)          | 11.9 (7.0 to 18.5)         | 1.3 (0.7 to 3.2)                               | 23.3 (-9.6 to 62.6)                 |
| Samoa                                         | 16.0 (11.9 to 21.2)        | 19.4 (14.2 to 25.1)        | 19.8 (14.7 to 25.6)        | 23.4 (14.7 to 34.0)        | 1.2 (-0.6 to 2.8)                              | 20.4 (-8.4 to 51.5)                 |
| Solomon Islands                               | 7.2 (5.2 to 9.8)           | 9.3 (6.6 to 12.6)          | 9.6 (6.7 to 12.9)          | 12.5 (7.1 to 19.9)         | 1.8 (-0.2 to 3.9)                              | 33.5 (-3.2 to 79.5)                 |
| Tonga                                         | 30.8 (23.6 to 38.6)        | 24.9 (18.6 to 31.4)        | 25.5 (18.7 to 31.9)        | 26.9 (17.5 to 37.9)        | 0.4 (-1.3 to 2.0)                              | 7.6 (-17.4 to 34.4)                 |
| Vanuatu                                       | 10.2 (7.4 to 13.7)         | 13.7 (10.0 to 18.3)        | 14.0 (10.1 to 18.5)        | 17.8 (10.6 to 26.8)        | 1.6 (-0.2 to 3.3)                              | 29.1 (-3.1 to 62.9)                 |
| <b>Southeast Asia</b>                         |                            |                            |                            |                            |                                                |                                     |
| Cambodia                                      | 5.0 (4.3 to 5.9)           | 5.1 (3.9 to 6.7)           | 5.4 (4.1 to 7.2)           | 6.8 (4.0 to 10.8)          | 1.7 (-0.1 to 3.5)                              | 31.3 (-1.7 to 69.8)                 |
| Indonesia                                     | 7.8 (6.2 to 9.8)           | 14.9 (11.2 to 19.3)        | 15.4 (11.4 to 20.0)        | 23.8 (15.4 to 34.6)        | 3.0 (1.5 to 4.4)                               | 58.9 (25.6 to 93.1)                 |
| Laos                                          | 5.1 (3.8 to 7.0)           | 6.8 (4.9 to 9.2)           | 7.3 (5.2 to 9.9)           | 11.1 (6.9 to 17.4)         | 3.2 (1.3 to 4.9)                               | 62.1 (21.9 to 107.2)                |
| Malaysia                                      | 18.0 (13.5 to 23.3)        | 26.6 (20.0 to 33.6)        | 27.4 (20.8 to 34.9)        | 36.3 (25.2 to 49.8)        | 2.0 (0.7 to 3.3)                               | 36.0 (10.5 to 64.1)                 |
| Maldives                                      | 4.5 (3.4 to 5.9)           | 13.6 (10.9 to 16.7)        | 14.4 (11.4 to 18.0)        | 26.7 (18.8 to 35.2)        | 4.4 (3.2 to 5.5)                               | 95.5 (62.8 to 128.8)                |
| Mauritius                                     | 14.4 (10.5 to 19.0)        | 21.0 (15.5 to 27.2)        | 21.6 (16.1 to 27.8)        | 28.5 (18.4 to 41.0)        | 2.0 (0.4 to 3.4)                               | 35.4 (6.4 to 66.3)                  |
| Myanmar                                       | 5.0 (3.6 to 6.8)           | 9.6 (6.7 to 12.9)          | 10.2 (7.2 to 13.7)         | 17.1 (10.2 to 25.0)        | 3.8 (2.0 to 5.4)                               | 77.5 (34.4 to 123.6)                |
| Philippines                                   | 5.7 (3.8 to 7.9)           | 8.9 (6.3 to 12.2)          | 9.3 (6.6 to 12.6)          | 14.0 (8.1 to 21.4)         | 2.9 (0.9 to 4.8)                               | 55.6 (14.4 to 106.3)                |
| Sri Lanka                                     | 9.7 (6.9 to 13.2)          | 15.5 (11.3 to 20.4)        | 16.3 (11.8 to 21.5)        | 23.7 (14.3 to 33.8)        | 2.7 (1.0 to 4.3)                               | 52.2 (15.5 to 90.0)                 |
| Seychelles                                    | 11.7 (8.4 to 15.8)         | 14.9 (10.6 to 19.7)        | 15.5 (11.2 to 20.5)        | 20.0 (12.3 to 29.1)        | 1.9 (0.1 to 3.6)                               | 33.7 (1.7 to 70.8)                  |
| Thailand                                      | 11.3 (8.7 to 14.1)         | 19.2 (15.9 to 22.5)        | 19.9 (16.1 to 23.6)        | 29.2 (20.5 to 38.2)        | 2.7 (1.3 to 4.0)                               | 51.4 (21.5 to 83.2)                 |
| Timor-Leste                                   | 7.5 (6.0 to 9.5)           | 11.6 (8.9 to 14.9)         | 11.6 (8.8 to 15.0)         | 15.4 (9.2 to 22.9)         | 1.8 (-0.1 to 3.4)                              | 31.6 (-2.0 to 66.5)                 |
| Vietnam                                       | 4.1 (3.0 to 5.5)           | 10.4 (7.8 to 13.7)         | 11.0 (8.2 to 14.6)         | 19.4 (12.4 to 27.8)        | 4.1 (2.4 to 5.5)                               | 85.1 (43.3 to 128.8)                |
| <b>Sub-Saharan Africa</b>                     |                            |                            |                            |                            |                                                |                                     |
| <b>Central Sub-Saharan Africa</b>             |                            |                            |                            |                            |                                                |                                     |
| Angola                                        | 14.0 (10.8 to 17.8)        | 16.6 (12.1 to 21.9)        | 17.8 (13.0 to 23.4)        | 23.2 (14.7 to 34.2)        | 2.2 (0.5 to 3.6)                               | 39.1 (7.8 to 71.5)                  |
| Central African Republic                      | 16.9 (13.9 to 20.2)        | 10.9 (8.4 to 14.2)         | 10.9 (8.1 to 14.2)         | 9.2 (5.7 to 14.1)          | -1.3 (-3.0 to 0.5)                             | -17.0 (-36.3 to 7.2)                |
| Congo                                         | 16.0 (12.5 to 19.8)        | 13.4 (10.1 to 17.0)        | 14.0 (10.4 to 17.9)        | 14.8 (9.4 to 21.6)         | 0.6 (-1.1 to 2.1)                              | 9.5 (-14.9 to 36.2)                 |
| Democratic Republic of the Congo              | 13.5 (10.9 to 16.6)        | 15.5 (12.0 to 19.6)        | 16.4 (12.6 to 21.1)        | 20.1 (13.1 to 29.1)        | 1.6 (-0.1 to 3.1)                              | 28.7 (-0.7 to 59.8)                 |
| Equatorial Guinea                             | 30.3 (25.4 to 34.8)        | 41.8 (34.1 to 50.0)        | 42.8 (34.7 to 50.9)        | 50.8 (37.9 to 63.7)        | 1.3 (0.3 to 2.1)                               | 21.3 (4.4 to 36.6)                  |
| Gabon                                         | 15.9 (12.1 to 19.9)        | 17.9 (14.0 to 22.4)        | 18.8 (14.4 to 23.9)        | 21.5 (13.9 to 31.2)        | 1.1 (-0.5 to 2.7)                              | 19.7 (-6.6 to 49.6)                 |
| <b>Eastern Sub-Saharan Africa</b>             |                            |                            |                            |                            |                                                |                                     |
| Burundi                                       | 8.4 (6.2 to 11.1)          | 8.2 (6.0 to 11.0)          | 8.4 (6.0 to 11.3)          | 8.5 (6.0 to 13.5)          | 0.1 (-1.9 to 2.0)                              | 2.3 (-24.5 to 35.7)                 |
| Comoros                                       | 31.6 (27.0 to 36.4)        | 22.2 (16.9 to 28.4)        | 22.5 (17.1 to 29.0)        | 19.5 (12.7 to 29.1)        | -1.0 (-2.4 to 0.5)                             | -13.0 (-30.3 to 8.5)                |
| Dibouti                                       | 18.0 (14.3 to 23.0)        | 24.6 (19.2 to 30.7)        | 25.6 (19.8 to 31.9)        | 31.9 (20.1 to 44.1)        | 1.7 (0.1 to 2.9)                               | 29.1 (1.7 to 55.4)                  |
| Eritrea                                       | 9.4 (6.9 to 12.4)          | 12.0 (8.7 to 16.0)         | 12.5 (9.0 to 16.8)         | 15.6 (9.3 to 24.3)         | 1.6 (-0.2 to 3.5)                              | 29.0 (-3.3 to 68.2)                 |
| Ethiopia                                      | 6.7 (5.0 to 8.8)           | 9.8 (7.1 to 13.0)          | 10.6 (7.5 to 14.1)         | 14.9 (8.9 to 22.7)         | 2.7 (0.9 to 4.3)                               | 51.4 (13.8 to 91.4)                 |
| Kenya                                         | 14.3 (11.9 to 17.1)        | 12.8 (10.2 to 15.7)        | 13.5 (10.6 to 16.7)        | 14.6 (9.5 to 21.3)         | 0.8 (-1.0 to 2.4)                              | 13.2 (-14.0 to 44.2)                |
| Madagascar                                    | 10.0 (7.4 to 13.0)         | 10.7 (7.7 to 14.3)         | 11.1 (8.1 to 15.0)         | 12.5 (7.3 to 19.9)         | 0.9 (-1.0 to 2.7)                              | 16.2 (-14.3 to 50.3)                |
| Malawi                                        | 23.8 (20.7 to 27.2)        | 19.0 (15.5 to 22.7)        | 19.2 (15.4 to 23.4)        | 17.1 (11.4 to 24.3)        | -0.8 (-2.3 to 0.7)                             | -10.4 (-29.2 to 10.9)               |
| Mozambique                                    | 15.0 (12.4 to 18.0)        | 17.8 (14.1 to 22.1)        | 18.7 (14.6 to 23.4)        | 23.0 (14.8 to 33.0)        | 1.6 (-0.0 to 3.0)                              | 28.2 (-0.1 to 57.2)                 |
| Rwanda                                        | 16.4 (13.7 to 19.3)        | 20.1 (15.9 to 24.7)        | 20.9 (16.2 to 26.2)        | 25.1 (15.8 to 36.0)        | 1.4 (-0.2 to 2.8)                              | 24.0 (-3.2 to 52.9)                 |
| Somalia                                       | 9.9 (7.3 to 13.0)          | 10.0 (7.3 to 13.5)         | 10.3 (7.6 to 14.0)         | 11.1 (6.7 to 17.4)         | 0.6 (-1.4 to 2.5)                              | 10.1 (-18.5 to 44.6)                |
| South Sudan                                   | 17.9 (15.2 to 21.1)        | 12.6 (9.2 to 16.7)         | 12.8 (9.3 to 17.0)         | 11.0 (6.6 to 17.0)         | -1.0 (-2.7 to 0.7)                             | -13.0 (-33.5 to 10.3)               |
| Tanzania                                      | 13.4 (10.5 to 16.4)        | 13.1 (10.1 to 17.1)        | 14.0 (10.7 to 18.1)        | 16.3 (10.2 to 24.0)        | 1.3 (-0.3 to 2.9)                              | 23.1 (-4.5 to 53.5)                 |
| Uganda                                        | 15.2 (12.5 to 18.8)        | 14.8 (11.2 to 18.8)        | 15.5 (11.2 to 19.8)        | 16.6 (10.2 to 24.4)        | 0.6 (-1.1 to 2.2)                              | 10.8 (-14.8 to 38.4)                |
| Zambia                                        | 29.3 (26.7 to 31.9)        | 35.3 (29.9 to 40.9)        | 36.2 (30.3 to 42.3)        | 41.7 (30.4 to 53.9)        | 1.1 (-0.0 to 2.0)                              | 17.7 (-0.7 to 34.2)                 |
| <b>Southern Sub-Saharan Africa</b>            |                            |                            |                            |                            |                                                |                                     |
| Botswana                                      | 15.5 (12.1 to 19.4)        | 21.0 (15.7 to 27.1)        | 21.9 (16.5 to 28.3)        | 28.4 (18.6 to 40.2)        | 2.0 (0.5 to 3.3)                               | 34.8 (8.2 to 64.0)                  |
| Lesotho                                       | 14.6 (11.9 to 17.8)        | 16.2 (12.8 to 20.1)        | 16.7 (13.0 to 21.1)        | 19.3 (12.0 to 28.4)        | 1.0 (-0.7 to 2.6)                              | 17.8 (-10.1 to 48.1)                |
| Namibia                                       | 7.9 (5.9 to 10.2)          | 12.1 (9.2 to 15.8)         | 12.7 (9.6 to 16.8)         | 16.8 (10.3 to 25.4)        | 2.1 (0.1 to 3.8)                               | 37.5 (2.0 to 75.5)                  |
| South Africa                                  | 26.1 (22.2 to 30.0)        | 30.4 (26.2 to 35.1)        | 30.7 (25.9 to 36.2)        | 35.1 (25.9 to 45.9)        | 0.9 (-0.4 to 2.0)                              | 14.7 (-6.0 to 35.4)                 |
| Swaziland                                     | 25.9 (22.2 to 29.8)        | 22.7 (18.3 to 27.4)        | 23.1 (18.2 to 28.5)        | 23.5 (15.1 to 33.9)        | 0.1 (-1.5 to 1.6)                              | 2.5 (-19.7 to 27.3)                 |

|                                                                                                                     | Estimate in 2000 (95% UIs) | Estimate in 2015 (95% UIs) | Estimate in 2017 (95% UIs) | Estimate in 2020 (95% UIs) | Annualised rate of change, 2015-2020 (95% UIs) | Percent change, 2015-2020 (95% UIs) |
|---------------------------------------------------------------------------------------------------------------------|----------------------------|----------------------------|----------------------------|----------------------------|------------------------------------------------|-------------------------------------|
| Zimbabwe                                                                                                            | 16.8 (13.9 to 20.0)        | 11.1 (8.5 to 14.0)         | 11.5 (8.7 to 14.8)         | 9.9 (6.2 to 15.1)          | -0.8 (-2.4 to 0.9)                             | -11.2 (-30.6 to 13.9)               |
| <b>Western Sub-Saharan Africa</b>                                                                                   |                            |                            |                            |                            |                                                |                                     |
| Benin                                                                                                               | 11.5 (9.6 to 13.5)         | 17.8 (13.9 to 22.1)        | 18.2 (14.3 to 22.7)        | 22.5 (14.7 to 31.9)        | 1.5 (0.1 to 2.8)                               | 25.6 (0.7 to 51.8)                  |
| Burkina Faso                                                                                                        | 11.2 (9.1 to 13.8)         | 12.5 (9.5 to 16.2)         | 12.9 (9.7 to 17.2)         | 14.4 (8.9 to 23.3)         | 0.8 (-0.1 to 2.6)                              | 14.5 (-14.2 to 48.6)                |
| Cameroon                                                                                                            | 18.6 (15.7 to 21.9)        | 19.9 (15.7 to 24.9)        | 20.9 (16.2 to 26.2)        | 23.6 (15.4 to 33.9)        | 1.0 (-0.5 to 2.5)                              | 17.6 (-7.4 to 45.0)                 |
| Cape Verde                                                                                                          | 14.2 (10.2 to 19.0)        | 16.4 (11.9 to 21.7)        | 17.1 (12.5 to 22.4)        | 19.4 (12.1 to 29.4)        | 1.1 (-0.7 to 2.9)                              | 18.1 (-10.3 to 53.9)                |
| Chad                                                                                                                | 8.5 (6.8 to 10.3)          | 7.7 (5.7 to 10.2)          | 8.0 (5.7 to 10.7)          | 8.0 (4.7 to 12.8)          | 0.1 (-1.6 to 1.9)                              | 2.8 (-21.8 to 33.3)                 |
| Cote d'Ivoire                                                                                                       | 13.3 (10.4 to 16.7)        | 13.7 (10.4 to 17.6)        | 14.2 (10.7 to 18.3)        | 15.6 (10.0 to 23.2)        | 0.7 (-0.9 to 2.4)                              | 12.6 (-13.0 to 44.2)                |
| The Gambia                                                                                                          | 8.4 (6.5 to 10.5)          | 9.8 (7.2 to 12.8)          | 10.2 (7.5 to 13.5)         | 12.2 (7.2 to 18.7)         | 1.3 (-0.6 to 3.1)                              | 23.5 (-8.4 to 59.3)                 |
| Ghana                                                                                                               | 11.1 (8.5 to 14.6)         | 8.9 (6.6 to 11.5)          | 9.4 (7.0 to 12.3)          | 9.1 (5.8 to 13.8)          | 0.1 (-1.6 to 1.7)                              | 1.8 (-20.9 to 28.7)                 |
| Guinea                                                                                                              | 10.0 (7.8 to 12.6)         | 10.1 (7.4 to 13.3)         | 10.5 (7.8 to 13.9)         | 11.3 (6.8 to 17.6)         | 0.7 (-1.1 to 2.4)                              | 11.7 (-15.4 to 43.6)                |
| Guinea-Bissau                                                                                                       | 14.8 (12.3 to 17.8)        | 17.1 (13.4 to 21.2)        | 16.9 (13.1 to 21.4)        | 16.7 (11.0 to 23.6)        | -0.2 (-1.6 to 1.1)                             | -3.0 (-21.2 to 17.8)                |
| Liberia                                                                                                             | 8.9 (6.7 to 11.5)          | 10.2 (7.6 to 13.5)         | 10.5 (7.7 to 14.0)         | 11.2 (6.8 to 17.6)         | 0.5 (-1.3 to 2.3)                              | 8.5 (-8.3 to 42.0)                  |
| Mali                                                                                                                | 9.1 (7.7 to 10.7)          | 9.3 (7.0 to 12.1)          | 9.7 (7.2 to 12.7)          | 10.4 (6.3 to 16.0)         | 0.6 (-1.1 to 2.4)                              | 10.4 (-15.2 to 42.7)                |
| Mauritania                                                                                                          | 10.7 (7.9 to 14.1)         | 10.4 (7.7 to 13.8)         | 11.0 (8.1 to 14.4)         | 12.6 (7.7 to 19.0)         | 1.1 (-0.8 to 3.0)                              | 19.7 (-10.6 to 56.8)                |
| Niger                                                                                                               | 5.6 (4.1 to 7.4)           | 7.0 (5.1 to 9.2)           | 7.2 (5.2 to 9.5)           | 8.2 (4.8 to 12.6)          | 0.9 (-1.1 to 2.8)                              | 16.3 (-14.8 to 51.3)                |
| Nigeria                                                                                                             | 15.6 (12.4 to 19.5)        | 16.9 (13.2 to 21.0)        | 17.2 (13.2 to 21.6)        | 18.8 (12.0 to 27.3)        | 0.6 (-1.0 to 2.2)                              | 10.3 (-14.2 to 39.6)                |
| Sao Tome and Principe                                                                                               | 13.5 (10.2 to 17.1)        | 10.2 (7.8 to 13.1)         | 10.6 (8.0 to 13.8)         | 9.8 (6.4 to 14.0)          | -0.4 (-1.8 to 1.1)                             | -4.6 (-23.1 to 18.6)                |
| Senegal                                                                                                             | 8.1 (6.0 to 10.6)          | 8.1 (5.8 to 10.8)          | 8.4 (6.1 to 11.2)          | 9.3 (5.4 to 14.6)          | 0.9 (-1.2 to 2.8)                              | 15.1 (-16.5 to 51.2)                |
| Sierra Leone                                                                                                        | 13.9 (11.6 to 16.7)        | 20.9 (17.2 to 24.7)        | 21.5 (17.3 to 26.0)        | 28.5 (19.3 to 39.0)        | 2.0 (0.5 to 3.2)                               | 35.4 (8.4 to 61.6)                  |
| Togo                                                                                                                | 8.7 (7.1 to 10.6)          | 8.6 (6.4 to 11.1)          | 9.2 (6.8 to 12.0)          | 10.6 (6.6 to 16.3)         | 1.2 (-0.5 to 3.0)                              | 21.6 (-6.7 to 56.8)                 |
| <b>Indicator 3.1.1: Maternal mortality ratio (maternal deaths per 100,000 livebirths) in women aged 10-54 years</b> |                            |                            |                            |                            |                                                |                                     |
| <b>Central Europe, Eastern Europe, and Central Asia</b>                                                             |                            |                            |                            |                            |                                                |                                     |
| <b>Central Asia</b>                                                                                                 |                            |                            |                            |                            |                                                |                                     |
| Armenia                                                                                                             | 60.3 (55.8 to 65.0)        | 20.5 (18.9 to 22.2)        | 23.9 (21.7 to 26.1)        | 28.7 (18.9 to 40.7)        | 2.1 (-0.6 to 4.6)                              | 40.0 (-8.1 to 100.5)                |
| Azerbaijan                                                                                                          | 44.0 (38.3 to 51.0)        | 25.4 (20.6 to 31.1)        | 25.8 (20.6 to 32.0)        | 27.9 (17.5 to 41.1)        | 0.5 (-2.1 to 3.1)                              | 9.9 (-27.4 to 58.3)                 |
| Georgia                                                                                                             | 22.3 (20.2 to 24.5)        | 43.2 (40.1 to 47.2)        | 38.2 (35.0 to 42.0)        | 28.9 (19.0 to 43.0)        | -2.8 (-5.4 to -0.2)                            | -33.3 (-55.6 to -2.2)               |
| Kazakhstan                                                                                                          | 73.0 (68.7 to 77.6)        | 14.2 (13.0 to 15.4)        | 15.3 (13.5 to 17.0)        | 19.6 (11.6 to 30.9)        | 2.0 (-1.2 to 5.2)                              | 38.0 (-16.3 to 117.8)               |
| Kyrgyzstan                                                                                                          | 62.9 (57.4 to 68.7)        | 46.0 (42.8 to 49.4)        | 39.5 (35.5 to 43.6)        | 41.0 (27.6 to 59.3)        | -0.9 (-3.4 to 1.8)                             | -10.7 (-39.8 to 31.2)               |
| Mongolia                                                                                                            | 182.8 (162.4 to 204.2)     | 43.2 (35.1 to 52.8)        | 42.7 (34.0 to 53.5)        | 40.8 (24.0 to 65.4)        | -0.6 (-3.5 to 2.5)                             | -5.6 (-41.1 to 45.8)                |
| Tajikistan                                                                                                          | 49.2 (43.1 to 56.0)        | 26.6 (21.8 to 32.0)        | 25.1 (20.1 to 31.0)        | 26.2 (17.1 to 39.8)        | -0.2 (-2.7 to 2.5)                             | -1.2 (-33.0 to 45.8)                |
| Turkmenistan                                                                                                        | 12.3 (11.4 to 13.3)        | 11.2 (10.3 to 12.2)        | 10.1 (8.7 to 11.6)         | 13.3 (8.7 to 19.3)         | 1.0 (-1.6 to 3.5)                              | 19.0 (-2.2 to 69.1)                 |
| Uzbekistan                                                                                                          | 55.5 (51.5 to 59.5)        | 27.7 (24.7 to 31.1)        | 26.6 (22.1 to 32.0)        | 25.6 (16.9 to 36.9)        | -0.7 (-3.2 to 1.9)                             | -7.8 (-38.0 to 32.2)                |
| <b>Central Europe</b>                                                                                               |                            |                            |                            |                            |                                                |                                     |
| Albania                                                                                                             | 15.2 (12.8 to 18.1)        | 10.0 (7.2 to 13.4)         | 9.3 (6.4 to 12.8)          | 11.4 (7.0 to 17.4)         | 0.8 (-1.6 to 3.0)                              | 14.6 (-21.2 to 56.5)                |
| Bosnia and Herzegovina                                                                                              | 20.5 (16.1 to 25.7)        | 7.3 (6.1 to 8.5)           | 7.2 (5.8 to 8.7)           | 7.9 (6.0 to 10.3)          | 0.5 (-1.0 to 2.1)                              | 9.1 (-14.0 to 36.6)                 |
| Bulgaria                                                                                                            | 71.2 (66.6 to 76.1)        | 18.6 (17.3 to 20.1)        | 19.8 (17.8 to 22.0)        | 21.1 (15.9 to 27.2)        | 0.8 (-1.0 to 2.5)                              | 13.6 (-13.6 to 45.6)                |
| Croatia                                                                                                             | 14.8 (13.7 to 15.9)        | 5.8 (5.4 to 6.3)           | 5.9 (5.2 to 6.7)           | 5.1 (3.9 to 6.7)           | -0.9 (-2.6 to 0.9)                             | -12.1 (-32.0 to 14.0)               |
| Czech Republic                                                                                                      | 14.6 (13.5 to 15.7)        | 4.9 (4.5 to 5.3)           | 5.4 (4.8 to 6.0)           | 5.7 (4.5 to 7.2)           | 1.0 (-0.6 to 2.5)                              | 16.4 (-8.4 to 46.5)                 |
| Hungary                                                                                                             | 13.6 (12.7 to 14.7)        | 15.7 (14.5 to 16.9)        | 12.2 (10.9 to 13.7)        | 7.7 (5.6 to 10.0)          | -4.8 (-6.7 to -3.0)                            | -51.1 (-63.6 to -36.3)              |
| Macedonia                                                                                                           | 18.1 (15.4 to 21.0)        | 11.5 (10.4 to 12.7)        | 8.9 (7.3 to 10.9)          | 7.7 (5.7 to 10.2)          | -1.3 (-2.8 to 0.3)                             | -16.7 (-34.5 to 5.2)                |
| Montenegro                                                                                                          | 16.4 (13.7 to 19.4)        | 7.5 (6.0 to 9.2)           | 7.2 (5.7 to 9.0)           | 7.1 (5.1 to 9.8)           | -0.5 (-2.1 to 1.3)                             | -5.8 (-26.8 to 22.2)                |
| Poland                                                                                                              | 13.9 (13.0 to 14.7)        | 4.3 (4.0 to 4.6)           | 4.7 (4.2 to 5.2)           | 6.9 (5.5 to 8.7)           | 3.2 (1.7 to 4.8)                               | 62.8 (29.5 to 105.4)                |
| Romania                                                                                                             | 47.1 (44.1 to 50.2)        | 18.1 (16.9 to 19.4)        | 17.3 (15.4 to 19.2)        | 13.8 (10.5 to 17.7)        | -1.9 (-3.5 to -0.2)                            | -24.1 (-40.8 to -3.1)               |
| Serbia                                                                                                              | 21.2 (18.1 to 24.2)        | 12.6 (10.7 to 14.9)        | 12.6 (10.3 to 15.1)        | 8.9 (6.4 to 12.0)          | -2.4 (-4.2 to -0.6)                            | -29.5 (-46.5 to -9.2)               |
| Slovakia                                                                                                            | 14.2 (12.2 to 16.1)        | 7.0 (5.9 to 8.2)           | 7.7 (6.3 to 9.2)           | 8.7 (6.1 to 11.4)          | 1.4 (-0.4 to 3.1)                              | 23.7 (-5.8 to 60.3)                 |
| Slovenia                                                                                                            | 12.6 (11.5 to 13.9)        | 7.0 (6.4 to 7.6)           | 6.2 (5.4 to 7.2)           | 4.8 (3.5 to 6.4)           | -2.5 (-4.5 to -0.6)                            | -30.8 (-49.3 to -8.6)               |
| <b>Eastern Europe</b>                                                                                               |                            |                            |                            |                            |                                                |                                     |
| Belarus                                                                                                             | 62.7 (57.8 to 67.5)        | 11.6 (10.2 to 13.3)        | 11.8 (10.1 to 13.8)        | 17.3 (11.2 to 25.9)        | 2.5 (-0.0 to 5.3)                              | 49.5 (-0.0 to 122.1)                |
| Estonia                                                                                                             | 35.2 (32.5 to 38.1)        | 2.1 (1.9 to 2.3)           | 3.4 (2.7 to 4.2)           | 4.7 (2.7 to 7.8)           | 5.1 (1.8 to 8.7)                               | 123.7 (30.4 to 268.2)               |
| Latvia                                                                                                              | 29.9 (27.5 to 32.5)        | 31.2 (28.2 to 33.9)        | 14.0 (11.1 to 17.5)        | 15.2 (8.9 to 23.6)         | -5.0 (-8.3 to -1.9)                            | -51.2 (-71.2 to -25.3)              |
| Lithuania                                                                                                           | 14.3 (13.1 to 15.5)        | 12.2 (11.1 to 13.3)        | 9.4 (8.2 to 10.7)          | 9.0 (5.5 to 14.5)          | -2.2 (-5.3 to 1.1)                             | -26.1 (-44.8 to 17.9)               |
| Moldova                                                                                                             | 35.2 (32.7 to 38.1)        | 27.2 (25.0 to 29.4)        | 18.5 (16.5 to 20.5)        | 19.2 (12.1 to 28.3)        | -2.5 (-5.4 to 0.3)                             | -29.3 (-55.7 to 4.5)                |
| Russia                                                                                                              | 66.0 (64.1 to 68.0)        | 15.2 (14.8 to 15.6)        | 15.3 (14.8 to 15.9)        | 17.9 (10.1 to 30.9)        | 0.8 (-2.7 to 4.7)                              | 17.6 (-33.0 to 101.7)               |
| Ukraine                                                                                                             | 103.1 (97.2 to 108.9)      | 36.5 (32.2 to 39.6)        | 34.2 (29.8 to 38.6)        | 42.4 (25.4 to 66.7)        | 0.8 (-2.4 to 3.9)                              | 16.2 (-30.6 to 79.3)                |
| <b>High-income</b>                                                                                                  |                            |                            |                            |                            |                                                |                                     |
| <b>Australasia</b>                                                                                                  |                            |                            |                            |                            |                                                |                                     |
| Australia                                                                                                           | 8.2 (7.6 to 8.8)           | 4.5 (4.2 to 4.9)           | 4.7 (3.9 to 5.6)           | 4.2 (3.2 to 5.5)           | -0.6 (-2.3 to 1.2)                             | -7.4 (-29.0 to 19.9)                |
| New Zealand                                                                                                         | 13.1 (12.3 to 13.9)        | 10.6 (9.9 to 11.4)         | 10.7 (9.6 to 11.8)         | 8.0 (5.8 to 10.9)          | -1.9 (-3.9 to 0.1)                             | -24.4 (-44.6 to 1.5)                |
| <b>High-income Asia Pacific</b>                                                                                     |                            |                            |                            |                            |                                                |                                     |
| Brunei                                                                                                              | 39.9 (33.9 to 46.4)        | 47.3 (38.1 to 58.8)        | 48.9 (38.3 to 61.7)        | 48.4 (36.0 to 63.3)        | 0.1 (-1.2 to 1.5)                              | 2.3 (-16.8 to 25.8)                 |
| Japan                                                                                                               | 10.6 (10.3 to 10.9)        | 5.3 (5.1 to 5.5)           | 5.1 (4.8 to 5.4)           | 4.9 (3.9 to 6.2)           | -0.6 (-2.1 to 1.0)                             | -7.9 (-26.7 to 16.6)                |
| South Korea                                                                                                         | 18.6 (17.5 to 19.7)        | 10.3 (9.4 to 11.3)         | 9.6 (8.4 to 10.9)          | 8.2 (6.1 to 10.9)          | -1.6 (-3.3 to 0.2)                             | -21.0 (-39.4 to 3.1)                |
| Singapore                                                                                                           | 13.4 (11.9 to 15.1)        | 7.3 (6.7 to 7.9)           | 5.5 (4.9 to 6.2)           | 5.5 (3.9 to 7.5)           | -1.9 (-4.1 to 0.1)                             | -23.9 (-46.1 to 0.8)                |
| <b>High-income North America</b>                                                                                    |                            |                            |                            |                            |                                                |                                     |
| Canada                                                                                                              | 7.4 (7.0 to 7.9)           | 8.3 (7.7 to 9.0)           | 7.9 (7.0 to 8.9)           | 6.9 (5.3 to 8.8)           | -1.3 (-3.0 to 0.3)                             | -16.8 (-35.8 to 4.5)                |
| Greenland                                                                                                           | 17.9 (15.3 to 20.8)        | 17.3 (14.3 to 20.9)        | 14.9 (12.1 to 18.4)        | 15.9 (9.4 to 27.5)         | -0.8 (-3.9 to 3.0)                             | -7.9 (-44.5 to 56.8)                |
| United States                                                                                                       | 25.1 (24.5 to 25.6)        | 32.0 (30.9 to 32.0)        | 30.1 (28.3 to 32.2)        | 27.2 (20.4 to 35.3)        | -1.2 (-3.0 to 0.6)                             | -15.1 (-36.0 to 9.3)                |
| <b>Southern Latin America</b>                                                                                       |                            |                            |                            |                            |                                                |                                     |
| Argentina                                                                                                           | 55.5 (52.7 to 58.2)        | 52.5 (49.8 to 55.5)        | 50.7 (42.3 to 60.1)        | 46.1 (34.0 to 60.0)        | -0.9 (-2.9 to 0.8)                             | -12.3 (-35.5 to 13.4)               |
| Chile                                                                                                               | 29.1 (27.2 to 30.9)        | 25.4 (23.8 to 27.2)        | 22.7 (18.9 to 27.0)        | 18.1 (14.2 to 23.0)        | -2.3 (-3.9 to -0.8)                            | -28.6 (-44.1 to -11.3)              |
| Uruguay                                                                                                             | 31.6 (29.5 to 33.8)        | 26.9 (25.0 to 29.2)        | 25.2 (20.6 to 30.3)        | 19.6 (14.4 to 25.8)        | -2.2 (-4.1 to -0.3)                            | -27.3 (-46.0 to -4.9)               |
| <b>Western Europe</b>                                                                                               |                            |                            |                            |                            |                                                |                                     |
| Andorra                                                                                                             | 6.1 (4.6 to 8.2)           | 4.9 (3.4 to 6.9)           | 5.0 (3.5 to 7.0)           | 5.0 (3.1 to 7.8)           | 0.1 (-1.9 to 2.2)                              | 2.4 (-24.4 to 38.1)                 |
| Austria                                                                                                             | 8.5 (7.9 to 9.2)           | 5.3 (4.9 to 5.7)           | 4.3 (3.8 to 4.8)           | 4.1 (3.1 to 5.4)           | -1.7 (-3.6 to 0.2)                             | -22.2 (-41.5 to 2.8)                |
| Belgium                                                                                                             | 11.0 (10.2 to 11.8)        | 7.4 (6.9 to 8.0)           | 6.6 (6.0 to 7.4)           | 6.0 (4.5 to 8.0)           | -1.4 (-3.3 to 0.5)                             | -18.3 (-38.8 to 8.4)                |
| Cyprus                                                                                                              | 26.6 (21.2 to 32.7)        | 8.4 (6.9 to 10.2)          | 8.2 (6.6 to 10.1)          | 8.7 (5.9 to 12.1)          | 0.1 (-2.0 to 2.2)                              | 3.1 (-26.2 to 39.0)                 |
| Denmark                                                                                                             | 4.2 (3.9 to 4.4)           | 2.3 (2.1 to 2.5)           | 3.6 (3.2 to 4.1)           | 3.1 (2.2 to 4.2)           | 2.0 (-0.2 to 4.1)                              | 36.1 (-2.3 to 84.2)                 |
| Finland                                                                                                             | 8.6 (8.0 to 9.2)           | 4.0 (3.7 to 4.3)           | 3.6 (3.2 to 4.1)           | 3.5 (2.5 to 4.9)           | -0.9 (-3.2 to 1.4)                             | -11.7 (-37.7 to 23.3)               |
| France                                                                                                              | 12.0 (11.4 to 12.7)        | 7.3 (6.8 to 7.9)           | 7.1 (6.3 to 7.9)           | 6.1 (4.7 to 7.7)           | -1.3 (-3.0 to 0.3)                             | -16.8 (-35.8 to 5.3)                |

|                                     | Estimate in 2000 (95% UIs) | Estimate in 2015 (95% UIs) | Estimate in 2017 (95% UIs) | Estimate in 2020 (95% UIs) | Annualised rate of change, 2015-2020 (95% UIs) | Percent change, 2015-2020 (95% UIs) |
|-------------------------------------|----------------------------|----------------------------|----------------------------|----------------------------|------------------------------------------------|-------------------------------------|
| Germany                             | 15.7 (14.9 to 16.7)        | 7.7 (7.2 to 8.2)           | 7.9 (6.6 to 9.5)           | 6.7 (5.0 to 8.9)           | -1.0 (-2.8 to 0.8)                             | -13.2 (-34.6 to 12.7)               |
| Greece                              | 7.4 (6.9 to 8.0)           | 7.3 (6.8 to 7.8)           | 9.2 (8.2 to 10.2)          | 7.5 (6.6 to 9.1)           | 0.1 (-1.7 to 1.9)                              | 2.3 (-2.1 to 33.8)                  |
| Iceland                             | 4.3 (4.1 to 4.8)           | 2.3 (2.3 to 2.8)           | 1.2 (1.0 to 1.3)           | 0.9 (0.6 to 1.4)           | -7.1 (-10.0 to -3.8)                           | -64.3 (-77.6 to -43.5)              |
| Ireland                             | 3.7 (3.4 to 4.0)           | 4.2 (3.8 to 4.6)           | 3.9 (3.4 to 4.5)           | 3.1 (2.3 to 4.1)           | -2.2 (-4.1 to -0.2)                            | -27.0 (-46.2 to -3.5)               |
| Israel                              | 6.3 (5.8 to 6.8)           | 5.0 (4.7 to 5.5)           | 5.3 (4.7 to 6.0)           | 4.5 (3.1 to 6.0)           | -0.9 (-3.1 to 1.2)                             | -11.8 (-37.3 to 19.8)               |
| Italy                               | 7.1 (6.6 to 7.6)           | 4.4 (4.1 to 4.8)           | 3.6 (3.2 to 4.1)           | 3.3 (2.5 to 4.3)           | -2.1 (-3.8 to -0.4)                            | -26.4 (-43.4 to -5.7)               |
| Luxembourg                          | 13.8 (12.7 to 14.9)        | 8.2 (7.3 to 9.2)           | 7.2 (6.2 to 8.4)           | 5.6 (3.8 to 8.4)           | -2.7 (-5.1 to 0.1)                             | -31.5 (-53.1 to 1.5)                |
| Malta                               | 15.8 (14.4 to 17.2)        | 11.3 (10.2 to 12.4)        | 11.5 (10.3 to 12.8)        | 9.6 (5.7 to 15.5)          | -1.3 (-4.6 to 2.1)                             | -14.8 (-49.5 to 36.8)               |
| Netherlands                         | 14.7 (13.7 to 15.7)        | 5.8 (5.4 to 6.3)           | 6.4 (5.6 to 7.1)           | 5.9 (4.3 to 7.9)           | 0.0 (-2.0 to 2.0)                              | 1.4 (-25.9 to 34.5)                 |
| Norway                              | 6.7 (6.5 to 7.0)           | 2.3 (2.2 to 2.4)           | 3.1 (3.0 to 3.3)           | 3.0 (2.2 to 4.0)           | 1.8 (-0.3 to 3.8)                              | 31.7 (-4.8 to 76.2)                 |
| Portugal                            | 12.3 (11.5 to 13.1)        | 8.2 (7.6 to 9.0)           | 8.0 (6.9 to 9.2)           | 5.4 (3.9 to 7.4)           | -2.9 (-4.9 to -0.7)                            | -34.6 (-52.1 to -10.5)              |
| Spain                               | 8.3 (7.8 to 8.9)           | 5.9 (5.4 to 6.3)           | 5.1 (4.5 to 5.7)           | 4.0 (3.0 to 5.3)           | -2.6 (-4.3 to -0.6)                            | -31.2 (-47.3 to -8.8)               |
| Sweden                              | 7.8 (7.4 to 8.2)           | 2.7 (2.6 to 2.9)           | 3.2 (3.0 to 3.5)           | 2.9 (2.2 to 3.7)           | 0.4 (-1.4 to 2.1)                              | 7.2 (-18.7 to 38.0)                 |
| Switzerland                         | 10.6 (9.8 to 11.4)         | 8.3 (7.6 to 9.0)           | 6.0 (5.2 to 6.8)           | 5.2 (3.7 to 7.3)           | -3.2 (-5.3 to -1.0)                            | -37.1 (-54.9 to -13.9)              |
| United Kingdom                      | 13.5 (13.2 to 13.8)        | 7.0 (6.9 to 7.2)           | 8.0 (7.7 to 8.2)           | 6.6 (4.8 to 8.8)           | -0.5 (-2.5 to 1.4)                             | -6.6 (-30.8 to 23.7)                |
| <b>Latin America and Caribbean</b>  |                            |                            |                            |                            |                                                |                                     |
| <b>Andean Latin America</b>         |                            |                            |                            |                            |                                                |                                     |
| Bolivia                             | 236.8 (191.8 to 275.8)     | 159.6 (102.5 to 207.6)     | 153.6 (91.7 to 202.1)      | 126.7 (72.0 to 183.3)      | -1.6 (-3.1 to 0.1)                             | -20.8 (-37.6 to 1.6)                |
| Ecuador                             | 98.1 (93.3 to 102.5)       | 82.2 (75.0 to 89.5)        | 75.7 (64.5 to 87.9)        | 65.9 (51.1 to 82.9)        | -1.5 (-3.1 to 0.0)                             | -19.7 (-36.8 to 0.5)                |
| Peru                                | 162.4 (143.3 to 183.1)     | 72.5 (59.8 to 86.1)        | 71.3 (54.0 to 91.8)        | 59.3 (37.6 to 89.8)        | -1.5 (-4.1 to 1.1)                             | -18.3 (-45.7 to 18.2)               |
| <b>Caribbean</b>                    |                            |                            |                            |                            |                                                |                                     |
| Antigua and Barbuda                 | 37.5 (33.3 to 42.4)        | 67.9 (50.6 to 79.1)        | 59.3 (50.6 to 71.2)        | 52.9 (42.2 to 86.4)        | -1.9 (-4.9 to 1.4)                             | -22.2 (-51.9 to 23.4)               |
| The Bahamas                         | 68.0 (61.6 to 75.0)        | 107.3 (94.9 to 120.9)      | 104.8 (89.5 to 123.0)      | 92.6 (63.2 to 142.5)       | -0.9 (-3.4 to 1.8)                             | -10.4 (-39.5 to 30.2)               |
| Barbados                            | 52.7 (48.2 to 58.1)        | 84.0 (74.3 to 93.5)        | 79.8 (68.0 to 91.5)        | 60.2 (41.1 to 91.7)        | -2.2 (-4.7 to 0.3)                             | -26.4 (-50.3 to 5.1)                |
| Belize                              | 42.8 (39.0 to 47.0)        | 73.6 (67.8 to 80.2)        | 63.8 (57.6 to 70.9)        | 87.4 (54.9 to 137.9)       | 1.0 (-2.0 to 4.1)                              | 18.8 (-25.5 to 86.2)                |
| Bermuda                             | 23.9 (21.4 to 26.6)        | 21.5 (18.2 to 24.9)        | 17.9 (14.8 to 21.0)        | 18.3 (9.1 to 34.2)         | -1.4 (-5.5 to 2.8)                             | -15.0 (-56.4 to 52.9)               |
| Cuba                                | 54.3 (51.2 to 57.6)        | 53.4 (49.7 to 57.2)        | 48.4 (40.3 to 57.9)        | 35.8 (25.3 to 49.7)        | -2.8 (-5.0 to -0.5)                            | -32.9 (-52.9 to -7.7)               |
| Dominica                            | 80.5 (73.0 to 88.3)        | 179.4 (159.3 to 201.6)     | 153.2 (133.2 to 175.3)     | 131.1 (78.7 to 216.1)      | -2.2 (-5.4 to 1.1)                             | -25.9 (-55.7 to 18.6)               |
| Dominican Republic                  | 60.5 (53.1 to 68.7)        | 117.0 (98.3 to 139.6)      | 109.3 (86.5 to 137.1)      | 81.1 (53.6 to 113.8)       | -2.5 (-4.9 to -0.2)                            | -20.6 (-51.9 to -3.2)               |
| Grenada                             | 49.1 (44.7 to 54.3)        | 99.7 (89.9 to 109.3)       | 99.2 (88.5 to 110.8)       | 91.9 (64.7 to 130.0)       | -0.6 (-2.9 to 1.7)                             | -7.8 (-34.8 to 28.7)                |
| Guyana                              | 124.5 (115.2 to 134.3)     | 128.6 (112.3 to 146.8)     | 122.4 (99.4 to 149.0)      | 125.7 (70.1 to 219.3)      | 0.4 (-3.9 to 3.4)                              | -2.4 (-44.3 to 66.6)                |
| Haiti                               | 407.4 (337.6 to 510.8)     | 330.4 (254.3 to 456.6)     | 319.8 (241.9 to 441.2)     | 331.8 (227.9 to 499.1)     | 0.0 (-1.6 to 1.6)                              | 0.4 (-21.4 to 27.3)                 |
| Jamaica                             | 62.8 (59.0 to 67.2)        | 76.1 (61.1 to 93.2)        | 73.6 (55.3 to 97.9)        | 72.2 (47.8 to 108.7)       | -0.4 (-2.4 to 1.6)                             | -5.4 (-30.0 to 27.7)                |
| Puerto Rico                         | 34.8 (32.5 to 37.4)        | 36.5 (33.5 to 39.5)        | 23.8 (20.9 to 27.1)        | 24.3 (17.0 to 35.0)        | -2.8 (-5.1 to -0.4)                            | -33.4 (-53.8 to -5.6)               |
| Saint Lucia                         | 48.9 (44.7 to 53.4)        | 85.0 (76.5 to 94.2)        | 82.1 (72.1 to 93.8)        | 71.4 (49.8 to 98.9)        | -1.3 (-3.5 to 1.0)                             | -16.0 (-40.5 to 16.4)               |
| Saint Vincent and the Grenadines    | 69.7 (63.6 to 76.6)        | 116.5 (105.6 to 128.7)     | 98.4 (86.5 to 112.3)       | 77.3 (53.9 to 108.8)       | -2.8 (-4.9 to -0.5)                            | -33.7 (-52.2 to -7.1)               |
| Suriname                            | 82.0 (73.1 to 92.1)        | 107.7 (93.8 to 123.7)      | 108.9 (92.6 to 128.0)      | 109.9 (77.7 to 153.0)      | 0.0 (-2.0 to 2.1)                              | 2.0 (-25.6 to 37.5)                 |
| Trinidad and Tobago                 | 68.5 (62.9 to 74.8)        | 54.9 (38.8 to 74.7)        | 55.5 (37.8 to 77.0)        | 57.9 (34.0 to 89.3)        | 0.3 (-2.5 to 2.8)                              | 6.1 (-31.0 to 52.2)                 |
| Virgin Islands, U.S.                | 38.3 (31.7 to 45.7)        | 54.4 (42.8 to 68.4)        | 52.2 (39.5 to 68.4)        | 49.4 (28.5 to 79.1)        | -0.8 (-3.6 to 1.9)                             | -9.3 (-41.6 to 33.7)                |
| <b>Central Latin America</b>        |                            |                            |                            |                            |                                                |                                     |
| Colombia                            | 75.7 (72.7 to 79.0)        | 76.7 (73.1 to 80.4)        | 50.0 (42.5 to 59.5)        | 44.0 (33.2 to 56.2)        | -3.8 (-5.5 to -2.1)                            | -42.6 (-56.0 to -26.7)              |
| Costa Rica                          | 29.1 (26.0 to 42.1)        | 28.3 (26.0 to 31.0)        | 28.3 (24.8 to 32.5)        | 26.7 (21.2 to 34.2)        | -0.4 (-1.9 to 1.0)                             | -5.8 (-24.3 to 16.4)                |
| El Salvador                         | 38.3 (33.3 to 43.9)        | 41.9 (33.2 to 51.2)        | 40.1 (29.1 to 53.8)        | 40.5 (27.1 to 57.1)        | -0.3 (-2.4 to 1.7)                             | -3.4 (-30.5 to 28.1)                |
| Guatemala                           | 134.9 (129.1 to 141.1)     | 93.1 (88.1 to 98.2)        | 110.5 (93.0 to 130.1)      | 93.1 (68.3 to 122.4)       | -0.1 (-2.0 to 1.8)                             | 0.0 (-26.1 to 31.5)                 |
| Honduras                            | 170.0 (125.8 to 225.3)     | 116.2 (81.0 to 166.8)      | 111.9 (77.6 to 158.1)      | 108.4 (69.0 to 164.2)      | -0.5 (-2.2 to 1.2)                             | -6.7 (-27.7 to 20.0)                |
| Mexico                              | 56.7 (55.5 to 58.0)        | 43.5 (42.5 to 44.6)        | 44.4 (42.9 to 45.9)        | 42.9 (34.0 to 45.9)        | -0.1 (-1.7 to 1.4)                             | -1.4 (-22.2 to 22.9)                |
| Nicaragua                           | 106.1 (93.8 to 121.9)      | 59.8 (52.4 to 68.8)        | 53.9 (41.7 to 66.7)        | 50.6 (35.2 to 69.2)        | -1.2 (-3.3 to 0.8)                             | -15.4 (-38.9 to 12.1)               |
| Panama                              | 59.8 (55.0 to 64.5)        | 73.3 (68.5 to 78.7)        | 71.8 (63.3 to 80.2)        | 51.2 (36.2 to 80.2)        | -2.5 (-4.7 to -0.4)                            | -30.2 (-50.8 to -5.2)               |
| Venezuela                           | 61.4 (58.5 to 64.2)        | 68.1 (60.9 to 76.4)        | 68.5 (53.4 to 85.8)        | 67.5 (46.6 to 94.6)        | -0.2 (-2.3 to 1.9)                             | -1.0 (-28.8 to 33.9)                |
| <b>Tropical Latin America</b>       |                            |                            |                            |                            |                                                |                                     |
| Brazil                              | 68.4 (66.3 to 70.3)        | 69.1 (67.4 to 70.8)        | 67.3 (65.2 to 69.8)        | 58.5 (47.1 to 71.5)        | -1.1 (-2.6 to 0.3)                             | -15.3 (-32.0 to 3.8)                |
| Paraguay                            | 129.9 (116.1 to 144.4)     | 73.5 (59.5 to 90.3)        | 74.1 (53.2 to 99.2)        | 71.4 (47.4 to 104.2)       | -0.3 (-2.4 to 1.7)                             | -3.0 (-30.5 to 29.9)                |
| <b>North Africa and Middle East</b> |                            |                            |                            |                            |                                                |                                     |
| <b>North Africa and Middle East</b> |                            |                            |                            |                            |                                                |                                     |
| Afghanistan                         | 465.7 (316.0 to 626.5)     | 330.9 (226.0 to 462.9)     | 299.1 (200.9 to 420.5)     | 267.7 (155.8 to 410.6)     | -1.5 (-3.5 to 0.5)                             | -19.2 (-41.0 to 8.2)                |
| Algeria                             | 132.0 (113.2 to 150.1)     | 70.2 (57.9 to 81.8)        | 65.1 (52.5 to 77.7)        | 47.7 (36.8 to 58.1)        | -2.6 (-3.7 to -1.6)                            | -32.1 (-42.5 to -21.9)              |
| Bahrain                             | 31.9 (26.6 to 37.7)        | 19.2 (15.6 to 23.5)        | 19.1 (15.0 to 23.9)        | 16.8 (11.4 to 24.1)        | -1.0 (-3.0 to 1.2)                             | -12.7 (-36.0 to 18.9)               |
| Egypt                               | 92.2 (79.6 to 106.5)       | 61.0 (52.6 to 70.6)        | 61.8 (48.8 to 77.9)        | 49.4 (32.4 to 70.8)        | -1.5 (-4.0 to 0.9)                             | -18.9 (-45.4 to 14.6)               |
| Iran                                | 27.6 (24.4 to 30.8)        | 23.6 (21.9 to 25.8)        | 23.3 (21.4 to 25.6)        | 23.8 (18.3 to 29.6)        | 0.0 (-1.7 to 1.5)                              | 1.0 (-22.0 to 24.4)                 |
| Iraq                                | 108.9 (80.8 to 141.3)      | 24.4 (18.9 to 30.4)        | 22.0 (17.1 to 27.8)        | 16.8 (11.6 to 23.5)        | -2.5 (-4.4 to -0.6)                            | -31.0 (-48.2 to -9.1)               |
| Jordan                              | 84.7 (69.7 to 102.5)       | 21.9 (17.9 to 26.9)        | 21.2 (16.7 to 27.0)        | 19.4 (13.3 to 27.5)        | -0.9 (-2.9 to 1.0)                             | -11.6 (-35.3 to 16.7)               |
| Kuwait                              | 13.9 (12.8 to 15.0)        | 12.0 (10.7 to 13.2)        | 10.9 (9.5 to 12.4)         | 11.0 (6.2 to 19.5)         | 0.8 (-4.3 to 3.1)                              | -8.0 (-47.6 to 58.4)                |
| Lebanon                             | 35.5 (27.5 to 44.0)        | 21.8 (17.2 to 27.0)        | 21.8 (17.2 to 27.3)        | 22.8 (15.2 to 31.7)        | 0.2 (-1.8 to 2.3)                              | 4.6 (-24.1 to 40.3)                 |
| Libya                               | 30.1 (23.1 to 37.8)        | 42.3 (31.9 to 54.6)        | 41.9 (31.0 to 55.5)        | 43.4 (30.6 to 59.5)        | 0.1 (-1.1 to 1.4)                              | 2.6 (-15.7 to 23.3)                 |
| Morocco                             | 227.2 (200.2 to 259.5)     | 138.8 (100.2 to 185.4)     | 133.5 (92.8 to 186.3)      | 101.1 (67.7 to 144.8)      | -2.1 (-3.5 to -0.7)                            | -27.1 (-40.7 to -10.2)              |
| Palestine                           | 22.6 (19.0 to 26.7)        | 14.6 (12.5 to 17.2)        | 13.2 (11.2 to 15.8)        | 15.1 (7.7 to 30.5)         | -0.2 (-4.2 to 4.9)                             | 3.6 (-46.8 to 110.0)                |
| Oman                                | 26.3 (19.1 to 37.1)        | 17.8 (13.4 to 23.5)        | 17.7 (13.2 to 23.2)        | 19.3 (13.1 to 27.5)        | 0.5 (-1.2 to 2.2)                              | 8.5 (-16.7 to 38.7)                 |
| Qatar                               | 28.1 (21.5 to 35.8)        | 14.4 (10.7 to 19.1)        | 11.8 (8.6 to 15.6)         | 9.6 (6.0 to 14.8)          | -2.8 (-5.3 to -0.3)                            | -33.3 (-54.7 to -4.4)               |
| Saudi Arabia                        | 25.4 (20.9 to 30.6)        | 25.4 (18.1 to 35.4)        | 26.1 (17.8 to 36.8)        | 22.2 (13.8 to 33.6)        | -1.0 (-2.8 to 0.9)                             | -12.4 (-34.5 to 14.3)               |
| Sudan                               | 275.7 (204.3 to 356.5)     | 189.4 (133.4 to 248.6)     | 176.5 (125.1 to 229.6)     | 132.4 (82.2 to 194.4)      | -2.5 (-4.4 to -0.6)                            | -30.2 (-48.1 to -8.1)               |
| Syria                               | 43.8 (36.7 to 52.6)        | 16.4 (12.4 to 21.9)        | 16.3 (11.7 to 23.1)        | 17.3 (12.9 to 25.3)        | 0.3 (-1.2 to 1.8)                              | 4.9 (-16.2 to 30.8)                 |
| Tunisia                             | 47.0 (38.9 to 58.7)        | 28.6 (19.2 to 40.2)        | 27.6 (18.3 to 39.2)        | 20.7 (13.4 to 30.0)        | -2.2 (-3.5 to -0.8)                            | -27.6 (-40.8 to -11.6)              |
| Turkey                              | 78.0 (65.3 to 93.4)        | 23.6 (20.7 to 27.1)        | 21.7 (18.1 to 26.4)        | 17.7 (12.0 to 25.4)        | -2.0 (-4.3 to 0.3)                             | -24.9 (-47.5 to 4.5)                |
| United Arab Emirates                | 12.8 (9.8 to 16.6)         | 13.6 (9.0 to 19.9)         | 15.3 (10.0 to 23.1)        | 14.6 (8.8 to 22.4)         | 0.4 (-1.4 to 2.1)                              | 7.3 (-18.6 to 36.9)                 |
| Yemen                               | 307.2 (227.5 to 377.8)     | 208.4 (152.1 to 266.4)     | 206.1 (150.8 to 263.0)     | 238.7 (160.9 to 340.7)     | 0.8 (-0.9 to 2.6)                              | 14.6 (-12.7 to 47.3)                |
| <b>South Asia</b>                   |                            |                            |                            |                            |                                                |                                     |
| <b>South Asia</b>                   |                            |                            |                            |                            |                                                |                                     |
| Bangladesh                          | 320.6 (282.6 to 361.2)     | 176.5 (142.7 to 218.0)     | 164.1 (128.3 to 212.1)     | 123.7 (84.5 to 179.0)      | -2.5 (-4.5 to -0.4)                            | -30.0 (-49.1 to -5.8)               |
| Bhutan                              | 310.6 (252.8 to 389.9)     | 173.8 (106.8 to 233.8)     | 165.7 (97.3 to 233.8)      | 134.2 (76.2 to 198.2)      | -1.8 (-3.4 to -0.1)                            | -22.9 (-39.6 to -0.9)               |
| India                               | 379.0 (355.9 to 401.6)     | 162.6 (152.8 to 173.3)     | 159.6 (148.4 to 172.4)     | 129.0 (103.5 to 160.2)     | -1.6 (-2.9 to -0.2)                            | -20.7 (-35.0 to -3.6)               |



|                                               | Estimate in 2000 (95% UIs) | Estimate in 2015 (95% UIs) | Estimate in 2017 (95% UIs) | Estimate in 2020 (95% UIs) | Annualised rate of change, 2015-2020 (95% UIs) | Percent change, 2015-2020 (95% UIs) |
|-----------------------------------------------|----------------------------|----------------------------|----------------------------|----------------------------|------------------------------------------------|-------------------------------------|
| Nepal                                         | 289.0 (241.7 to 347.8)     | 234.8 (150.0 to 299.0)     | 214.0 (139.6 to 274.4)     | 199.2 (123.1 to 275.0)     | -1.1 (-2.4 to 0.2)                             | -15.2 (-29.8 to 3.1)                |
| Pakistan                                      | 475.2 (416.2 to 540.8)     | 332.0 (250.6 to 418.3)     | 309.1 (229.4 to 394.7)     | 268.0 (187.5 to 365.7)     | -1.5 (-2.9 to 0.0)                             | -19.3 (-35.2 to 0.4)                |
| <b>Southeast Asia, East Asia, and Oceania</b> |                            |                            |                            |                            |                                                |                                     |
| <b>East Asia</b>                              |                            |                            |                            |                            |                                                |                                     |
| China                                         | 94.1 (88.3 to 100.8)       | 14.6 (13.6 to 15.8)        | 13.7 (12.6 to 15.2)        | 9.2 (5.8 to 13.5)          | -3.2 (-6.1 to -0.6)                            | -36.7 (-59.9 to -8.0)               |
| North Korea                                   | 118.5 (86.5 to 158.2)      | 86.5 (62.5 to 117.0)       | 81.6 (57.7 to 113.8)       | 75.3 (51.8 to 108.8)       | -1.0 (-2.0 to 0.1)                             | -13.0 (-25.5 to 1.2)                |
| Taiwan (Province of China)                    | 13.2 (12.3 to 14.2)        | 16.7 (15.4 to 17.9)        | 15.2 (13.5 to 17.1)        | 16.4 (13.5 to 20.0)        | -0.2 (-1.5 to 1.2)                             | -1.7 (-20.5 to 20.0)                |
| <b>Oceania</b>                                |                            |                            |                            |                            |                                                |                                     |
| American Samoa                                | 65.7 (55.4 to 77.6)        | 111.5 (93.5 to 132.7)      | 105.9 (86.8 to 128.4)      | 71.5 (51.6 to 96.8)        | -3.0 (-4.7 to -1.4)                            | -35.9 (-50.3 to -18.5)              |
| Federated States of Micronesia                | 181.0 (122.8 to 249.3)     | 154.7 (78.6 to 237.3)      | 151.1 (71.6 to 233.6)      | 196.1 (71.6 to 381.2)      | 1.3 (-2.0 to 4.9)                              | 25.2 (-28.6 to 109.9)               |
| Fiji                                          | 75.4 (64.4 to 88.2)        | 62.4 (50.3 to 76.1)        | 64.1 (48.4 to 82.8)        | 60.9 (40.7 to 88.0)        | 4.0 (-2.3 to 1.8)                              | -3.5 (-28.7 to 31.6)                |
| Guam                                          | 30.7 (25.8 to 36.3)        | 43.8 (36.2 to 52.5)        | 45.5 (35.2 to 53.2)        | 37.0 (26.3 to 50.5)        | -1.2 (-3.0 to 0.6)                             | -15.6 (-36.4 to 8.7)                |
| Kiribati                                      | 251.3 (209.5 to 296.7)     | 235.9 (166.3 to 325.8)     | 229.8 (161.5 to 319.3)     | 242.4 (159.2 to 358.1)     | 0.1 (-1.5 to 1.8)                              | 2.7 (-20.5 to 30.2)                 |
| Marshall Islands                              | 268.2 (203.6 to 346.3)     | 234.1 (160.6 to 324.1)     | 225.1 (150.6 to 314.8)     | 171.6 (100.7 to 261.4)     | -2.2 (-4.5 to -0.3)                            | -26.8 (-49.3 to -3.7)               |
| Northern Mariana Islands                      | 33.3 (24.9 to 44.6)        | 48.9 (37.1 to 62.7)        | 40.4 (30.8 to 52.1)        | 83.9 (60.0 to 117.8)       | 3.5 (2.0 to 5.3)                               | 71.6 (34.6 to 120.6)                |
| Papua New Guinea                              | 581.0 (402.7 to 775.7)     | 519.2 (360.0 to 708.2)     | 495.6 (342.6 to 678.8)     | 412.5 (274.4 to 594.5)     | -1.6 (-2.8 to -0.4)                            | -20.6 (-34.0 to -5.2)               |
| Samoa                                         | 51.2 (38.5 to 67.2)        | 31.4 (19.6 to 42.8)        | 30.8 (18.5 to 42.8)        | 29.2 (16.5 to 42.0)        | -0.6 (-2.1 to 0.9)                             | -7.4 (-26.7 to 14.9)                |
| Solomon Islands                               | 164.7 (118.6 to 223.3)     | 153.2 (105.8 to 208.6)     | 147.6 (100.3 to 200.6)     | 123.2 (78.5 to 180.3)      | -1.5 (-3.1 to -0.0)                            | -19.7 (-36.8 to -0.2)               |
| Tonga                                         | 131.1 (112.1 to 151.3)     | 113.8 (82.9 to 150.9)      | 113.0 (80.5 to 153.5)      | 100.8 (68.4 to 140.5)      | -0.8 (-1.9 to 0.1)                             | -11.5 (-21.0 to 2.1)                |
| Vanuatu                                       | 128.1 (79.8 to 191.8)      | 114.1 (69.9 to 166.4)      | 111.1 (66.5 to 166.2)      | 103.5 (60.7 to 161.4)      | -0.7 (-2.1 to 0.8)                             | -9.2 (-27.1 to 12.0)                |
| <b>Southeast Asia</b>                         |                            |                            |                            |                            |                                                |                                     |
| Cambodia                                      | 345.9 (298.1 to 394.3)     | 119.5 (93.3 to 155.1)      | 111.5 (83.7 to 149.3)      | 123.0 (85.7 to 170.8)      | 0.1 (-1.5 to 1.6)                              | 2.9 (-20.3 to 27.5)                 |
| Indonesia                                     | 323.4 (296.4 to 363.1)     | 170.1 (155.8 to 186.3)     | 164.4 (149.1 to 181.8)     | 119.2 (100.4 to 140.0)     | -2.4 (-3.3 to -1.5)                            | -29.9 (-39.3 to -20.4)              |
| Laos                                          | 472.8 (384.0 to 574.7)     | 197.5 (139.8 to 251.3)     | 177.5 (124.8 to 228.4)     | 136.1 (89.5 to 192.3)      | -2.5 (-4.1 to -0.9)                            | -31.0 (-46.2 to -13.2)              |
| Malaysia                                      | 66.9 (60.2 to 74.4)        | 56.8 (49.7 to 64.8)        | 57.0 (45.9 to 68.4)        | 49.0 (37.1 to 63.1)        | -1.0 (-2.4 to 0.3)                             | -13.8 (-30.6 to 5.0)                |
| Maldives                                      | 198.7 (166.4 to 232.7)     | 77.6 (63.8 to 90.8)        | 78.8 (64.1 to 94.7)        | 117.4 (64.3 to 205.7)      | 2.5 (-1.1 to 6.4)                              | 51.4 (-15.0 to 161.0)               |
| Mauritius                                     | 35.2 (32.5 to 37.9)        | 52.6 (48.4 to 57.1)        | 55.1 (48.5 to 62.3)        | 38.3 (29.8 to 48.3)        | -2.1 (-3.7 to -0.6)                            | -27.0 (-42.9 to -8.3)               |
| Myanmar                                       | 259.6 (211.9 to 327.3)     | 223.9 (177.6 to 272.1)     | 211.1 (164.9 to 262.4)     | 113.1 (83.3 to 150.5)      | -4.6 (-6.0 to -3.2)                            | -49.5 (-59.5 to -38.5)              |
| Philippines                                   | 79.1 (71.3 to 86.6)        | 91.2 (81.2 to 101.0)       | 83.3 (66.5 to 101.8)       | 72.7 (51.3 to 100.4)       | -1.6 (-3.6 to 0.4)                             | -20.3 (-41.3 to 6.4)                |
| Sri Lanka                                     | 53.0 (49.0 to 57.0)        | 31.0 (25.8 to 37.3)        | 30.3 (25.8 to 39.1)        | 18.9 (12.5 to 27.2)        | -3.4 (-5.6 to -1.3)                            | -38.9 (-56.5 to -17.6)              |
| Seychelles                                    | 61.0 (50.3 to 73.3)        | 65.3 (57.6 to 80.3)        | 65.7 (54.1 to 77.3)        | 55.8 (38.6 to 77.7)        | 1.4 (-3.5 to 0.7)                              | -18.3 (-41.1 to 11.0)               |
| Thailand                                      | 84.2 (67.1 to 104.4)       | 39.1 (31.1 to 46.9)        | 41.5 (32.5 to 51.5)        | 36.6 (24.6 to 54.5)        | 4.6 (-3.1 to 2.1)                              | -6.2 (-37.0 to 37.8)                |
| Timor-Leste                                   | 444.9 (189.2 to 549.5)     | 247.3 (83.2 to 326.6)      | 242.8 (86.2 to 322.5)      | 211.0 (73.0 to 311.1)      | -1.1 (-2.9 to 0.7)                             | -14.5 (-25.2 to 11.7)               |
| Vietnam                                       | 33.0 (25.3 to 42.0)        | 15.0 (11.2 to 19.8)        | 14.0 (10.6 to 19.1)        | 12.5 (8.8 to 17.8)         | -1.3 (-2.6 to -0.0)                            | -16.7 (-32.5 to -0.2)               |
| <b>Sub-Saharan Africa</b>                     |                            |                            |                            |                            |                                                |                                     |
| <b>Central Sub-Saharan Africa</b>             |                            |                            |                            |                            |                                                |                                     |
| Angola                                        | 397.4 (314.1 to 491.0)     | 221.1 (170.0 to 268.4)     | 200.7 (154.3 to 244.2)     | 128.8 (92.5 to 178.9)      | -3.7 (-5.1 to -1.8)                            | -41.7 (-53.5 to -23.7)              |
| Central African Republic                      | 763.1 (571.5 to 1026.0)    | 616.5 (424.9 to 899.2)     | 584.8 (409.6 to 856.5)     | 729.3 (427.3 to 1211.4)    | 1.0 (-1.5 to 3.4)                              | 18.3 (-19.6 to 67.5)                |
| Congo                                         | 513.0 (387.2 to 643.0)     | 403.6 (273.6 to 572.0)     | 397.1 (263.3 to 570.2)     | 335.4 (196.1 to 570.2)     | -1.4 (-3.4 to 1.4)                             | -17.0 (-40.0 to 24.1)               |
| Democratic Republic of the Congo              | 334.0 (269.1 to 403.2)     | 378.8 (305.9 to 458.0)     | 346.6 (277.3 to 424.8)     | 257.2 (187.6 to 352.1)     | -2.6 (-4.2 to -1.1)                            | -32.1 (-46.4 to -14.9)              |
| Equatorial Guinea                             | 476.1 (328.5 to 663.1)     | 189.5 (103.5 to 289.2)     | 181.7 (102.0 to 270.6)     | 127.4 (69.5 to 201.3)      | -2.7 (-4.1 to -1.2)                            | -32.5 (-46.0 to -16.8)              |
| Gabon                                         | 300.8 (233.1 to 392.9)     | 211.0 (155.4 to 280.5)     | 198.6 (144.6 to 260.1)     | 204.3 (127.9 to 309.6)     | -0.3 (-2.5 to 2.4)                             | -3.1 (-31.8 to 43.4)                |
| <b>Eastern Sub-Saharan Africa</b>             |                            |                            |                            |                            |                                                |                                     |
| Burundi                                       | 614.8 (475.8 to 800.1)     | 267.1 (211.8 to 340.9)     | 260.1 (208.4 to 329.9)     | 266.0 (179.3 to 397.9)     | -0.1 (-2.2 to 2.1)                             | -4.4 (-28.3 to 37.9)                |
| Comoros                                       | 306.2 (251.3 to 366.1)     | 179.4 (139.9 to 225.5)     | 169.7 (131.6 to 214.8)     | 185.1 (137.5 to 241.4)     | 0.2 (-0.9 to 1.3)                              | 3.2 (-12.4 to 22.1)                 |
| Djibouti                                      | 489.9 (363.3 to 625.9)     | 392.4 (265.7 to 547.5)     | 375.2 (257.2 to 527.9)     | 351.5 (215.8 to 525.2)     | -0.8 (-2.8 to 1.1)                             | -10.4 (-34.7 to 17.7)               |
| Eritrea                                       | 529.4 (396.5 to 711.2)     | 455.0 (300.1 to 673.7)     | 439.2 (286.7 to 649.8)     | 517.5 (289.5 to 820.0)     | 0.8 (-1.4 to 2.5)                              | 13.7 (-18.4 to 46.4)                |
| Ethiopia                                      | 541.9 (472.7 to 634.9)     | 226.0 (194.0 to 259.2)     | 199.5 (168.7 to 231.9)     | 139.7 (107.6 to 177.0)     | -3.2 (-4.3 to -2.0)                            | -38.2 (-47.8 to -25.6)              |
| Kenya                                         | 409.2 (362.9 to 458.1)     | 301.0 (262.5 to 341.8)     | 289.3 (249.4 to 331.8)     | 289.5 (216.7 to 363.0)     | -0.5 (-1.8 to 0.2)                             | -6.8 (-23.8 to 18.9)                |
| Madagascar                                    | 395.2 (348.0 to 444.4)     | 286.0 (223.7 to 372.2)     | 266.3 (208.3 to 357.9)     | 290.9 (163.6 to 296.6)     | -1.8 (-2.7 to -1.9)                            | -23.4 (-34.6 to -12.3)              |
| Malawi                                        | 303.7 (249.7 to 356.8)     | 177.3 (133.9 to 226.0)     | 169.7 (127.0 to 214.5)     | 173.2 (117.7 to 240.3)     | 4.2 (-1.8 to 1.4)                              | -7.7 (-24.0 to 22.6)                |
| Mozambique                                    | 276.4 (228.5 to 325.5)     | 173.4 (117.9 to 297.9)     | 210.8 (161.8 to 276.7)     | 201.2 (130.2 to 315.0)     | -1.0 (-3.6 to 1.4)                             | -12.3 (-42.0 to 24.3)               |
| Rwanda                                        | 486.4 (413.4 to 573.0)     | 186.4 (138.2 to 234.7)     | 172.7 (128.8 to 221.7)     | 141.6 (84.5 to 236.8)      | -2.0 (-4.7 to 1.3)                             | -24.1 (-50.2 to 21.3)               |
| Somalia                                       | 542.8 (401.2 to 720.0)     | 356.6 (249.8 to 501.0)     | 342.8 (241.1 to 488.0)     | 336.3 (211.2 to 504.5)     | -0.5 (-2.1 to 1.3)                             | -5.7 (-26.8 to 20.9)                |
| South Sudan                                   | 418.7 (291.4 to 567.7)     | 346.3 (247.7 to 451.2)     | 343.5 (250.1 to 449.3)     | 282.3 (182.7 to 408.3)     | -1.4 (-3.1 to 0.4)                             | -18.4 (-37.1 to 6.6)                |
| Tanzania                                      | 285.1 (232.2 to 344.5)     | 252.7 (196.5 to 320.0)     | 245.8 (187.2 to 311.6)     | 182.5 (132.0 to 241.3)     | -2.2 (-3.3 to -1.2)                            | -27.8 (-38.6 to -16.2)              |
| Uganda                                        | 183.6 (151.3 to 216.2)     | 121.3 (89.8 to 153.9)      | 112.3 (82.9 to 142.9)      | 100.7 (67.7 to 143.6)      | -1.3 (-2.8 to 0.5)                             | -16.9 (-34.7 to 7.0)                |
| Zambia                                        | 238.5 (199.0 to 286.5)     | 113.5 (92.2 to 136.8)      | 112.4 (89.2 to 139.3)      | 103.8 (69.5 to 144.9)      | -0.7 (-3.0 to 1.2)                             | -8.5 (-36.2 to 19.6)                |
| <b>Southern Sub-Saharan Africa</b>            |                            |                            |                            |                            |                                                |                                     |
| Botswana                                      | 91.1 (52.8 to 142.3)       | 91.8 (69.7 to 119.8)       | 85.0 (62.1 to 110.7)       | 134.4 (67.3 to 298.1)      | 2.1 (-1.7 to 7.7)                              | 47.4 (-22.3 to 218.4)               |
| Lesotho                                       | 302.6 (208.4 to 415.2)     | 343.5 (221.6 to 545.0)     | 295.9 (204.1 to 458.8)     | 404.6 (208.4 to 771.7)     | 0.9 (-2.6 to 4.7)                              | 18.9 (-32.3 to 103.7)               |
| Namibia                                       | 255.2 (190.0 to 326.7)     | 100.2 (66.6 to 142.6)      | 99.8 (67.8 to 145.4)       | 94.1 (49.8 to 164.1)       | -0.6 (-3.7 to 2.8)                             | -5.8 (-43.0 to 51.3)                |
| South Africa                                  | 199.2 (185.2 to 214.8)     | 97.3 (76.7 to 120.7)       | 109.0 (90.6 to 129.5)      | 135.6 (44.7 to 418.6)      | 1.0 (-5.1 to 9.9)                              | 40.2 (-53.4 to 340.2)               |
| Swaziland                                     | 165.5 (109.3 to 246.5)     | 126.6 (78.0 to 203.4)      | 111.1 (71.5 to 168.6)      | 169.6 (67.2 to 388.3)      | 1.5 (-3.4 to 6.9)                              | 34.8 (-39.8 to 180.8)               |
| Zimbabwe                                      | 267.1 (191.9 to 354.1)     | 263.3 (207.7 to 350.4)     | 250.3 (198.6 to 330.9)     | 330.7 (177.4 to 623.6)     | 1.2 (-2.3 to 5.3)                              | 25.7 (-29.5 to 122.7)               |
| <b>Western Sub-Saharan Africa</b>             |                            |                            |                            |                            |                                                |                                     |
| Benin                                         | 390.2 (318.9 to 470.4)     | 286.9 (210.8 to 367.5)     | 267.5 (196.5 to 341.5)     | 219.6 (149.8 to 301.8)     | -1.8 (-3.3 to -0.3)                            | -23.5 (-39.3 to -4.7)               |
| Burkina Faso                                  | 340.7 (276.3 to 406.2)     | 228.0 (179.3 to 279.8)     | 218.3 (171.3 to 272.2)     | 168.8 (118.3 to 227.2)     | -2.1 (-3.7 to -0.7)                            | -26.4 (-42.9 to -10.4)              |
| Cameroon                                      | 470.2 (402.8 to 544.2)     | 323.8 (244.6 to 402.9)     | 299.5 (224.8 to 374.2)     | 250.1 (171.2 to 339.0)     | -1.8 (-3.3 to -0.2)                            | -22.7 (-38.9 to -2.8)               |
| Cape Verde                                    | 61.4 (48.4 to 75.5)        | 50.3 (42.0 to 59.2)        | 49.8 (40.7 to 60.3)        | 44.1 (34.8 to 54.3)        | -0.9 (-1.7 to -0.1)                            | -12.3 (-23.0 to -1.6)               |
| Chad                                          | 550.6 (455.2 to 646.6)     | 403.1 (331.2 to 481.8)     | 381.4 (303.9 to 462.5)     | 287.8 (201.6 to 387.4)     | -2.3 (-3.9 to -0.6)                            | -28.4 (-44.1 to -8.6)               |
| Cote d'Ivoire                                 | 423.7 (344.2 to 503.4)     | 324.7 (245.8 to 396.2)     | 303.7 (228.1 to 368.7)     | 237.2 (173.2 to 318.6)     | -2.1 (-3.4 to -0.7)                            | -26.9 (-39.7 to -10.2)              |
| The Gambia                                    | 545.4 (436.6 to 653.8)     | 462.0 (372.2 to 587.5)     | 451.6 (359.1 to 585.5)     | 386.2 (298.7 to 519.9)     | -1.2 (-2.1 to -0.1)                            | -16.4 (-27.5 to -1.4)               |
| Ghana                                         | 157.8 (130.3 to 183.1)     | 130.0 (109.5 to 151.8)     | 126.0 (102.7 to 149.9)     | 107.2 (84.3 to 132.4)      | -1.3 (-2.4 to -0.3)                            | -17.6 (-29.8 to -4.9)               |
| Guinea                                        | 641.1 (542.1 to 736.1)     | 482.8 (412.0 to 559.3)     | 448.7 (373.6 to 525.8)     | 370.0 (266.6 to 490.1)     | -1.8 (-3.5 to -0.3)                            | -23.4 (-40.0 to -4.1)               |
| Guinea-Bissau                                 | 301.3 (243.2 to 371.3)     | 209.1 (153.2 to 294.1)     | 198.7 (140.3 to 281.0)     | 166.6 (117.1 to 239.9)     | -1.5 (-2.8 to -0.3)                            | -20.3 (-33.8 to -5.0)               |
| Liberia                                       | 650.1 (548.4 to 753.4)     | 475.3 (384.1 to 574.5)     | 451.0 (363.6 to 545.2)     | 476.4 (350.8 to 635.3)     | -0.0 (-1.4 to 1.5)                             | 0.2 (-19.3 to 24.7)                 |
| Mali                                          | 493.8 (425.2 to 568.2)     | 304.2 (240.9 to 380.8)     | 290.4 (224.4 to 367.1)     | 191.2 (143.9 to 247.7)     | -3.1 (-4.0 to -2.1)                            | -37.1 (-45.3 to -27.3)              |
| Mauritania                                    | 714.6 (625.4 to 817.9)     | 449.9 (357.7 to 552.2)     | 427.0 (333.2 to 525.1)     | 340.7 (257.5 to 433.4)     | -1.9 (-2.7 to -1.0)                            | -24.3 (-33.5 to -14.4)              |
| Niger                                         | 444.8 (369.5 to 527.8)     | 306.7 (233.1 to 379.9)     | 289.9 (217.3 to 358.5)     | 195.2 (139.5 to 253.6)     | -3.0 (-4.0 to -1.9)                            | -36.3 (-45.0 to -25.2)              |

|                                                                                       | Estimate in 2000 (95% UIs) | Estimate in 2015 (95% UIs) | Estimate in 2017 (95% UIs) | Estimate in 2030 (95% UIs) | Annualised rate of change, 2015-2030 (95% UIs) | Percent change, 2015-2030 (95% UIs) |
|---------------------------------------------------------------------------------------|----------------------------|----------------------------|----------------------------|----------------------------|------------------------------------------------|-------------------------------------|
| Nigeria                                                                               | 322.1 (210.9 to 461.0)     | 227.2 (144.4 to 359.5)     | 230.0 (147.4 to 346.1)     | 174.1 (104.2 to 277.2)     | -2.1 (-3.5 to -0.6)                            | -26.4 (-40.5 to -8.9)               |
| Sao Tome and Principe                                                                 | 329.8 (273.3 to 385.6)     | 184.2 (147.9 to 227.6)     | 188.8 (131.9 to 210.2)     | 157.7 (104.2 to 222.6)     | -1.1 (-2.9 to 0.9)                             | -14.4 (-25.4 to 14.2)               |
| Senegal                                                                               | 414.0 (355.0 to 478.5)     | 298.5 (243.5 to 347.8)     | 281.9 (225.2 to 332.6)     | 235.6 (181.6 to 296.3)     | -1.6 (-2.7 to -0.5)                            | -21.1 (-33.3 to -6.6)               |
| Sierra Leone                                                                          | 691.1 (584.4 to 804.3)     | 483.4 (391.8 to 568.9)     | 450.6 (362.5 to 537.2)     | 441.9 (283.4 to 641.7)     | -0.7 (-2.9 to 1.7)                             | -8.6 (-35.7 to 29.8)                |
| Togo                                                                                  | 367.8 (290.4 to 447.4)     | 227.8 (170.1 to 289.3)     | 221.5 (168.2 to 276.2)     | 214.4 (154.3 to 282.3)     | -0.4 (-1.7 to 0.8)                             | -5.7 (-22.2 to 12.4)                |
| <b>Indicator 3.1.2: Proportion of births attended by skilled health personnel (%)</b> |                            |                            |                            |                            |                                                |                                     |
| <b>Central Europe, Eastern Europe, and Central Asia</b>                               |                            |                            |                            |                            |                                                |                                     |
| <b>Central Asia</b>                                                                   |                            |                            |                            |                            |                                                |                                     |
| Armenia                                                                               | 97.7 (96.9 to 98.3)        | 99.3 (98.9 to 99.6)        | 99.4 (99.0 to 99.7)        | 99.7 (99.2 to 99.9)        | 0.0 (0.0 to 0.0)                               | 0.4 (0.2 to 0.7)                    |
| Azerbaijan                                                                            | 88.8 (87.9 to 89.8)        | 96.6 (93.5 to 98.5)        | 97.0 (94.3 to 98.7)        | 98.9 (96.6 to 99.8)        | 0.2 (0.1 to 0.3)                               | 2.4 (1.2 to 4.2)                    |
| Georgia                                                                               | 97.1 (96.4 to 97.7)        | 99.0 (98.5 to 99.3)        | 99.0 (98.4 to 99.5)        | 99.4 (98.5 to 99.8)        | 0.0 (-0.0 to 0.0)                              | 0.4 (-0.2 to 0.7)                   |
| Kazakhstan                                                                            | 99.1 (98.6 to 99.5)        | 99.4 (99.2 to 99.7)        | 99.6 (99.3 to 99.8)        | 99.8 (99.3 to 99.9)        | 0.0 (0.0 to 0.0)                               | 0.3 (0.1 to 0.5)                    |
| Kyrgyzstan                                                                            | 98.3 (97.5 to 99.0)        | 99.5 (99.2 to 99.7)        | 99.6 (99.3 to 99.8)        | 99.8 (99.3 to 100.0)       | 0.0 (0.0 to 0.0)                               | 0.3 (0.1 to 0.5)                    |
| Mongolia                                                                              | 98.2 (97.8 to 98.6)        | 98.8 (98.2 to 99.3)        | 99.0 (98.2 to 99.4)        | 99.2 (98.0 to 99.8)        | 0.0 (-0.0 to 0.1)                              | 0.4 (-0.5 to 0.8)                   |
| Tajikistan                                                                            | 90.5 (87.3 to 93.1)        | 92.3 (88.7 to 95.1)        | 93.8 (89.9 to 96.6)        | 95.9 (89.0 to 98.9)        | 0.3 (0.0 to 0.4)                               | 3.9 (0.1 to 6.0)                    |
| Turkmenistan                                                                          | 97.5 (96.9 to 98.1)        | 99.2 (98.7 to 99.5)        | 99.3 (98.8 to 99.6)        | 99.7 (99.2 to 99.9)        | 0.0 (0.0 to 0.1)                               | 0.5 (0.2 to 0.8)                    |
| Uzbekistan                                                                            | 98.2 (97.4 to 98.8)        | 99.7 (99.3 to 99.9)        | 99.7 (99.4 to 99.9)        | 99.9 (99.7 to 100.0)       | 0.0 (0.0 to 0.0)                               | 0.2 (0.1 to 0.4)                    |
| <b>Central Europe</b>                                                                 |                            |                            |                            |                            |                                                |                                     |
| Albania                                                                               | 97.3 (96.7 to 97.9)        | 99.4 (98.7 to 99.7)        | 99.4 (98.8 to 99.7)        | 99.7 (99.2 to 100.0)       | 0.0 (0.0 to 0.0)                               | 0.4 (0.2 to 0.7)                    |
| Bosnia and Herzegovina                                                                | 99.0 (98.3 to 99.5)        | 99.5 (99.0 to 99.7)        | 99.5 (99.0 to 99.8)        | 99.7 (99.0 to 99.9)        | 0.0 (-0.0 to 0.0)                              | 0.2 (-0.1 to 0.5)                   |
| Bulgaria                                                                              | 98.9 (98.1 to 99.4)        | 99.5 (98.9 to 99.8)        | 99.5 (99.0 to 99.8)        | 99.7 (99.1 to 100.0)       | 0.0 (-0.0 to 0.0)                              | 0.2 (-0.1 to 0.5)                   |
| Croatia                                                                               | 98.8 (97.8 to 99.4)        | 99.4 (98.8 to 99.8)        | 99.4 (98.9 to 99.8)        | 99.6 (98.9 to 99.9)        | 0.0 (-0.0 to 0.0)                              | 0.2 (-0.2 to 0.5)                   |
| Czech Republic                                                                        | 98.9 (98.2 to 99.5)        | 99.4 (98.8 to 99.8)        | 99.5 (98.9 to 99.8)        | 99.6 (98.8 to 99.9)        | 0.0 (-0.0 to 0.0)                              | 0.2 (-0.3 to 0.5)                   |
| Hungary                                                                               | 97.0 (95.1 to 98.2)        | 98.9 (97.9 to 99.5)        | 99.0 (98.0 to 99.6)        | 99.4 (98.2 to 99.9)        | 0.0 (-0.0 to 0.1)                              | 0.5 (-0.1 to 1.1)                   |
| Macedonia                                                                             | 96.9 (95.5 to 98.1)        | 99.0 (98.1 to 99.5)        | 99.0 (98.1 to 99.5)        | 99.5 (98.5 to 99.9)        | 0.0 (0.0 to 0.1)                               | 0.6 (0.1 to 1.0)                    |
| Montenegro                                                                            | 98.2 (96.5 to 99.1)        | 99.0 (98.3 to 99.5)        | 99.1 (98.3 to 99.5)        | 99.3 (98.0 to 99.9)        | 0.0 (-0.0 to 0.1)                              | 0.3 (-0.5 to 0.8)                   |
| Poland                                                                                | 99.1 (98.4 to 99.5)        | 99.7 (99.4 to 99.9)        | 99.7 (99.4 to 99.9)        | 99.9 (99.6 to 100.0)       | 0.0 (0.0 to 0.0)                               | 0.2 (0.0 to 0.3)                    |
| Romania                                                                               | 98.4 (97.4 to 99.1)        | 99.4 (98.9 to 99.8)        | 99.5 (99.0 to 99.8)        | 99.8 (99.2 to 100.0)       | 0.0 (0.0 to 0.0)                               | 0.3 (0.1 to 0.7)                    |
| Serbia                                                                                | 99.0 (98.1 to 99.5)        | 99.5 (99.2 to 99.8)        | 99.6 (99.2 to 99.8)        | 99.7 (99.2 to 99.9)        | 0.0 (-0.0 to 0.0)                              | 0.2 (-0.1 to 0.4)                   |
| Slovakia                                                                              | 99.0 (98.2 to 99.4)        | 99.5 (99.1 to 99.8)        | 99.6 (99.2 to 99.8)        | 99.8 (99.2 to 100.0)       | 0.0 (-0.0 to 0.0)                              | 0.2 (-0.0 to 0.5)                   |
| Slovenia                                                                              | 98.9 (98.2 to 99.5)        | 99.6 (99.2 to 99.8)        | 99.6 (99.2 to 99.8)        | 99.8 (99.3 to 100.0)       | 0.0 (-0.0 to 0.0)                              | 0.2 (-0.1 to 0.4)                   |
| <b>Eastern Europe</b>                                                                 |                            |                            |                            |                            |                                                |                                     |
| Belarus                                                                               | 98.7 (97.7 to 99.3)        | 99.6 (99.2 to 99.8)        | 99.6 (99.3 to 99.8)        | 99.8 (99.5 to 100.0)       | 0.0 (0.0 to 0.0)                               | 0.3 (0.1 to 0.5)                    |
| Estonia                                                                               | 98.9 (98.2 to 99.5)        | 99.7 (99.4 to 99.9)        | 99.7 (99.5 to 99.9)        | 99.9 (99.6 to 100.0)       | 0.0 (0.0 to 0.0)                               | 0.2 (0.0 to 0.4)                    |
| Latvia                                                                                | 99.0 (98.2 to 99.5)        | 99.6 (99.2 to 99.8)        | 99.7 (99.3 to 99.9)        | 99.8 (99.4 to 100.0)       | 0.0 (-0.0 to 0.0)                              | 0.2 (-0.0 to 0.4)                   |
| Lithuania                                                                             | 99.0 (98.4 to 99.5)        | 99.6 (99.1 to 99.8)        | 99.6 (99.2 to 99.8)        | 99.7 (99.2 to 100.0)       | 0.0 (-0.0 to 0.0)                              | 0.2 (-0.1 to 0.4)                   |
| Moldova                                                                               | 99.1 (98.5 to 99.5)        | 99.3 (98.7 to 99.7)        | 99.5 (98.9 to 99.8)        | 99.7 (99.2 to 99.9)        | 0.0 (-0.0 to 0.0)                              | 0.3 (-0.1 to 0.7)                   |
| Russia                                                                                | 98.8 (98.0 to 99.4)        | 99.6 (99.2 to 99.8)        | 99.7 (99.3 to 99.9)        | 99.8 (99.4 to 100.0)       | 0.0 (0.0 to 0.0)                               | 0.2 (0.0 to 0.4)                    |
| Ukraine                                                                               | 99.0 (98.2 to 99.5)        | 99.3 (98.9 to 99.7)        | 99.4 (98.9 to 99.7)        | 99.6 (98.8 to 99.9)        | 0.0 (-0.0 to 0.0)                              | 0.2 (-0.2 to 0.5)                   |
| <b>High-income</b>                                                                    |                            |                            |                            |                            |                                                |                                     |
| <b>Australasia</b>                                                                    |                            |                            |                            |                            |                                                |                                     |
| Australia                                                                             | 98.9 (98.0 to 99.5)        | 99.3 (98.7 to 99.7)        | 99.4 (98.8 to 99.7)        | 99.5 (98.5 to 99.9)        | 0.0 (-0.0 to 0.0)                              | 0.2 (-0.4 to 0.5)                   |
| New Zealand                                                                           | 99.0 (98.0 to 99.6)        | 99.4 (98.8 to 99.8)        | 99.4 (98.9 to 99.8)        | 99.6 (98.7 to 99.9)        | 0.0 (-0.0 to 0.0)                              | 0.2 (-0.3 to 0.5)                   |
| <b>High-income Asia Pacific</b>                                                       |                            |                            |                            |                            |                                                |                                     |
| Brunei                                                                                | 98.6 (97.5 to 99.3)        | 99.1 (98.4 to 99.6)        | 99.2 (98.4 to 99.6)        | 99.3 (98.0 to 99.9)        | 0.0 (-0.0 to 0.0)                              | 0.2 (-0.6 to 0.7)                   |
| Japan                                                                                 | 98.8 (97.7 to 99.5)        | 99.3 (98.7 to 99.7)        | 99.3 (98.7 to 99.7)        | 99.3 (98.0 to 99.9)        | 0.0 (-0.0 to 0.0)                              | 0.2 (-0.5 to 0.6)                   |
| South Korea                                                                           | 98.7 (97.4 to 99.4)        | 99.6 (99.2 to 99.8)        | 99.6 (99.2 to 99.8)        | 99.8 (99.4 to 100.0)       | 0.0 (-0.0 to 0.0)                              | 0.2 (-0.0 to 0.4)                   |
| Singapore                                                                             | 98.9 (97.8 to 99.5)        | 99.5 (99.0 to 99.8)        | 99.5 (99.0 to 99.8)        | 99.7 (99.0 to 99.9)        | 0.0 (-0.0 to 0.0)                              | 0.2 (-0.2 to 0.4)                   |
| <b>High-income North America</b>                                                      |                            |                            |                            |                            |                                                |                                     |
| Canada                                                                                | 98.8 (97.8 to 99.4)        | 99.2 (98.4 to 99.6)        | 99.2 (98.5 to 99.7)        | 99.3 (98.1 to 99.9)        | 0.0 (-0.0 to 0.0)                              | 0.2 (-0.7 to 0.6)                   |
| Greenland                                                                             | 82.8 (70.5 to 92.1)        | 91.1 (83.1 to 96.1)        | 91.8 (84.1 to 96.3)        | 95.4 (87.6 to 98.8)        | 0.3 (0.0 to 0.6)                               | 4.7 (0.5 to 9.9)                    |
| United States                                                                         | 99.0 (99.0 to 99.0)        | 99.2 (99.0 to 99.3)        | 99.2 (99.1 to 99.3)        | 99.3 (99.1 to 99.5)        | 0.0 (0.0 to 0.0)                               | 0.2 (0.0 to 0.3)                    |
| <b>Southern Latin America</b>                                                         |                            |                            |                            |                            |                                                |                                     |
| Argentina                                                                             | 97.9 (96.7 to 98.7)        | 99.2 (98.8 to 99.5)        | 99.2 (98.6 to 99.6)        | 99.6 (98.8 to 99.9)        | 0.0 (0.0 to 0.0)                               | 0.4 (0.0 to 0.6)                    |
| Chile                                                                                 | 98.8 (97.9 to 99.4)        | 99.4 (98.9 to 99.7)        | 99.5 (98.9 to 99.8)        | 99.6 (98.9 to 99.9)        | 0.0 (-0.0 to 0.0)                              | 0.3 (-0.1 to 0.6)                   |
| Uruguay                                                                               | 95.0 (92.8 to 96.8)        | 98.7 (97.7 to 99.3)        | 98.9 (97.9 to 99.5)        | 99.5 (98.5 to 99.9)        | 0.1 (0.0 to 0.1)                               | 0.8 (0.4 to 1.3)                    |
| <b>Western Europe</b>                                                                 |                            |                            |                            |                            |                                                |                                     |
| Andorra                                                                               | 99.6 (99.2 to 99.8)        | 99.7 (99.4 to 99.9)        | 99.7 (99.4 to 99.9)        | 99.7 (99.2 to 99.9)        | 0.0 (-0.0 to 0.0)                              | 0.0 (-0.3 to 0.2)                   |
| Austria                                                                               | 99.4 (98.8 to 99.8)        | 99.7 (99.4 to 99.9)        | 99.7 (99.4 to 99.9)        | 99.8 (99.4 to 100.0)       | 0.0 (-0.0 to 0.0)                              | 0.1 (-0.1 to 0.3)                   |
| Belgium                                                                               | 99.3 (98.6 to 99.7)        | 99.6 (99.2 to 99.8)        | 99.6 (99.3 to 99.8)        | 99.8 (99.3 to 99.9)        | 0.0 (-0.0 to 0.0)                              | 0.1 (-0.1 to 0.3)                   |
| Cyprus                                                                                | 98.2 (96.5 to 99.2)        | 99.5 (99.0 to 99.8)        | 99.5 (99.0 to 99.8)        | 99.8 (99.3 to 99.9)        | 0.0 (0.0 to 0.0)                               | 0.3 (0.0 to 0.6)                    |
| Denmark                                                                               | 99.2 (98.3 to 99.7)        | 99.6 (99.2 to 99.8)        | 99.6 (99.2 to 99.8)        | 99.7 (99.3 to 99.9)        | 0.0 (-0.0 to 0.0)                              | 0.1 (-0.1 to 0.4)                   |
| Finland                                                                               | 99.3 (98.6 to 99.7)        | 99.7 (99.4 to 99.9)        | 99.7 (99.4 to 99.9)        | 99.8 (99.5 to 100.0)       | 0.0 (-0.0 to 0.0)                              | 0.1 (-0.1 to 0.3)                   |
| France                                                                                | 99.2 (98.5 to 99.7)        | 99.7 (99.3 to 99.9)        | 99.7 (99.3 to 99.9)        | 99.8 (99.3 to 100.0)       | 0.0 (-0.0 to 0.0)                              | 0.1 (-0.1 to 0.3)                   |
| Germany                                                                               | 99.2 (98.5 to 99.7)        | 99.6 (99.1 to 99.8)        | 99.6 (99.1 to 99.8)        | 99.7 (99.2 to 99.9)        | 0.0 (-0.0 to 0.0)                              | 0.1 (-0.1 to 0.4)                   |
| Greece                                                                                | 99.2 (98.3 to 99.7)        | 99.5 (99.0 to 99.8)        | 99.5 (98.9 to 99.9)        | 99.6 (98.9 to 99.9)        | 0.0 (-0.0 to 0.0)                              | 0.1 (-0.3 to 0.3)                   |
| Iceland                                                                               | 99.6 (99.2 to 99.8)        | 99.8 (99.5 to 99.9)        | 99.8 (99.5 to 99.9)        | 99.8 (99.4 to 100.0)       | 0.0 (-0.0 to 0.0)                              | 0.0 (-0.2 to 0.2)                   |
| Ireland                                                                               | 98.5 (97.0 to 99.3)        | 99.5 (98.9 to 99.8)        | 99.5 (99.0 to 99.8)        | 99.7 (99.1 to 99.9)        | 0.0 (-0.0 to 0.0)                              | 0.2 (-0.1 to 0.6)                   |
| Israel                                                                                | 98.3 (96.6 to 99.3)        | 99.1 (98.2 to 99.7)        | 99.2 (98.3 to 99.7)        | 99.5 (98.5 to 99.9)        | 0.0 (-0.0 to 0.1)                              | 0.3 (-0.2 to 0.8)                   |
| Italy                                                                                 | 99.4 (98.9 to 99.8)        | 99.7 (99.4 to 99.9)        | 99.7 (99.4 to 99.9)        | 99.8 (99.4 to 100.0)       | 0.0 (-0.0 to 0.0)                              | 0.1 (-0.1 to 0.2)                   |
| Luxembourg                                                                            | 98.8 (97.7 to 99.5)        | 99.3 (98.6 to 99.7)        | 99.3 (98.6 to 99.7)        | 99.4 (98.2 to 99.9)        | 0.0 (-0.0 to 0.0)                              | 0.2 (-0.6 to 0.5)                   |
| Malta                                                                                 | 98.6 (97.1 to 99.4)        | 99.4 (98.8 to 99.7)        | 99.4 (98.9 to 99.7)        | 99.7 (98.9 to 99.9)        | 0.0 (-0.0 to 0.0)                              | 0.3 (-0.0 to 0.6)                   |
| Netherlands                                                                           | 99.0 (98.0 to 99.6)        | 99.5 (99.0 to 99.8)        | 99.5 (99.0 to 99.8)        | 99.7 (99.0 to 99.9)        | 0.0 (-0.0 to 0.0)                              | 0.1 (-0.2 to 0.4)                   |
| Norway                                                                                | 99.5 (99.1 to 99.8)        | 99.7 (99.5 to 99.9)        | 99.7 (99.5 to 99.9)        | 99.8 (99.5 to 100.0)       | 0.0 (-0.0 to 0.0)                              | 0.1 (-0.1 to 0.2)                   |
| Portugal                                                                              | 99.0 (98.1 to 99.6)        | 99.6 (99.2 to 99.8)        | 99.6 (99.2 to 99.8)        | 99.8 (99.3 to 100.0)       | 0.0 (-0.0 to 0.0)                              | 0.2 (-0.0 to 0.4)                   |
| Spain                                                                                 | 99.1 (98.2 to 99.6)        | 99.6 (99.2 to 99.8)        | 99.6 (99.2 to 99.8)        | 99.8 (99.3 to 99.9)        | 0.0 (-0.0 to 0.0)                              | 0.2 (-0.1 to 0.4)                   |
| Sweden                                                                                | 99.6 (99.2 to 99.8)        | 99.7 (99.4 to 99.9)        | 99.7 (99.4 to 99.9)        | 99.8 (99.3 to 99.9)        | 0.0 (-0.0 to 0.0)                              | 0.1 (-0.2 to 0.2)                   |
| Switzerland                                                                           | 99.6 (99.2 to 99.8)        | 99.7 (99.4 to 99.9)        | 99.7 (99.4 to 99.9)        | 99.8 (99.3 to 100.0)       | 0.0 (-0.0 to 0.0)                              | 0.0 (-0.2 to 0.2)                   |
| United Kingdom                                                                        | 98.9 (98.1 to 99.5)        | 99.4 (98.8 to 99.8)        | 99.4 (98.8 to 99.8)        | 99.6 (98.8 to 99.9)        | 0.0 (-0.0 to 0.0)                              | 0.2 (-0.3 to 0.5)                   |
| <b>Latin America and Caribbean</b>                                                    |                            |                            |                            |                            |                                                |                                     |

|                                               | Estimate in 2000 (95% UIs) | Estimate in 2015 (95% UIs) | Estimate in 2017 (95% UIs) | Estimate in 2030 (95% UIs) | Annualised rate of change, 2015-2030 (95% UIs) | Percent change, 2015-2030 (95% UIs) |
|-----------------------------------------------|----------------------------|----------------------------|----------------------------|----------------------------|------------------------------------------------|-------------------------------------|
| <b>Andean Latin America</b>                   |                            |                            |                            |                            |                                                |                                     |
| Bolivia                                       | 61.8 (60.2 to 63.4)        | 83.5 (76.4 to 89.7)        | 85.3 (75.8 to 91.8)        | 93.2 (82.1 to 98.2)        | 0.7 (0.4 to 1.1)                               | 11.8 (5.7 to 17.4)                  |
| Ecuador                                       | 93.4 (91.1 to 95.4)        | 99.2 (98.7 to 99.5)        | 99.2 (98.5 to 99.6)        | 99.8 (99.3 to 99.9)        | 0.0 (0.0 to 0.1)                               | 0.6 (0.4 to 0.8)                    |
| Peru                                          | 63.1 (61.4 to 64.8)        | 93.4 (90.7 to 95.4)        | 94.0 (90.4 to 96.6)        | 98.5 (96.1 to 99.6)        | 0.4 (0.3 to 0.5)                               | 5.4 (4.0 to 7.0)                    |
| <b>Caribbean</b>                              |                            |                            |                            |                            |                                                |                                     |
| Antigua and Barbuda                           | 98.8 (97.9 to 99.4)        | 99.2 (98.5 to 99.6)        | 99.2 (98.5 to 99.7)        | 99.4 (98.0 to 99.9)        | 0.0 (-0.0 to 0.0)                              | 0.2 (-0.6 to 0.6)                   |
| The Bahamas                                   | 98.9 (98.0 to 99.5)        | 98.9 (98.0 to 99.5)        | 98.9 (98.0 to 99.5)        | 98.9 (96.7 to 99.8)        | -0.0 (-0.1 to 0.0)                             | -0.0 (-1.4 to 0.6)                  |
| Barbados                                      | 96.7 (95.0 to 98.0)        | 98.8 (97.8 to 99.4)        | 98.9 (97.8 to 99.5)        | 99.3 (97.8 to 99.9)        | 0.0 (-0.0 to 0.1)                              | 0.5 (-0.3 to 1.0)                   |
| Belize                                        | 92.5 (89.2 to 94.9)        | 96.6 (94.4 to 98.1)        | 96.8 (94.3 to 98.4)        | 98.1 (94.7 to 99.6)        | 0.1 (-0.0 to 0.2)                              | 1.5 (-0.4 to 2.7)                   |
| Bermuda                                       | 99.0 (98.2 to 99.5)        | 99.3 (98.7 to 99.7)        | 99.4 (98.8 to 99.7)        | 99.6 (98.8 to 99.9)        | 0.0 (-0.0 to 0.0)                              | 0.2 (-0.3 to 0.6)                   |
| Cuba                                          | 98.8 (97.9 to 99.4)        | 99.2 (98.7 to 99.5)        | 99.3 (98.8 to 99.6)        | 99.5 (98.7 to 99.9)        | 0.0 (-0.0 to 0.0)                              | 0.3 (-0.2 to 0.6)                   |
| Dominica                                      | 97.9 (96.5 to 98.8)        | 98.7 (97.5 to 99.4)        | 98.8 (97.7 to 99.5)        | 99.2 (97.7 to 99.8)        | 0.0 (-0.0 to 0.1)                              | 0.6 (-0.2 to 1.2)                   |
| Dominican Republic                            | 98.4 (98.2 to 98.7)        | 98.5 (97.7 to 99.1)        | 98.7 (97.8 to 99.3)        | 99.1 (97.7 to 99.8)        | 0.0 (-0.0 to 0.1)                              | 0.7 (-0.2 to 1.1)                   |
| Grenada                                       | 98.8 (97.8 to 99.4)        | 99.1 (98.2 to 99.6)        | 99.1 (98.2 to 99.6)        | 99.2 (97.6 to 99.9)        | 0.0 (-0.0 to 0.1)                              | 0.2 (-0.7 to 0.7)                   |
| Guyana                                        | 87.7 (85.3 to 89.9)        | 92.9 (90.4 to 95.0)        | 93.7 (90.2 to 96.2)        | 96.1 (90.8 to 98.8)        | 0.2 (-0.0 to 0.4)                              | 3.5 (-0.5 to 5.4)                   |
| Haiti                                         | 25.4 (22.5 to 28.5)        | 41.9 (27.2 to 58.7)        | 44.7 (28.9 to 62.5)        | 60.9 (31.6 to 87.0)        | 2.4 (-0.3 to 4.1)                              | 44.6 (-4.7 to 85.6)                 |
| Jamaica                                       | 98.0 (97.3 to 98.5)        | 98.8 (97.7 to 99.4)        | 98.8 (97.8 to 99.5)        | 99.2 (97.7 to 99.8)        | 0.0 (-0.0 to 0.1)                              | 0.5 (-0.4 to 1.0)                   |
| Puerto Rico                                   | 98.8 (97.8 to 99.4)        | 99.3 (98.7 to 99.7)        | 99.3 (98.7 to 99.7)        | 99.5 (98.4 to 99.9)        | 0.0 (-0.0 to 0.0)                              | 0.2 (-0.5 to 0.6)                   |
| Saint Lucia                                   | 98.5 (97.4 to 99.2)        | 98.9 (97.9 to 99.5)        | 99.0 (98.0 to 99.5)        | 99.2 (97.5 to 99.8)        | 0.0 (-0.0 to 0.1)                              | 0.3 (-0.7 to 0.9)                   |
| Saint Vincent and the Grenadines              | 98.7 (97.7 to 99.3)        | 98.9 (97.9 to 99.5)        | 98.9 (97.9 to 99.5)        | 99.0 (97.9 to 99.8)        | 0.0 (-0.1 to 0.2)                              | 0.1 (-1.1 to 0.8)                   |
| Suriname                                      | 87.3 (83.6 to 90.3)        | 96.3 (93.6 to 98.3)        | 96.3 (93.4 to 98.2)        | 98.6 (94.1 to 99.7)        | 0.2 (0.1 to 0.2)                               | 2.3 (1.1 to 3.6)                    |
| Trinidad and Tobago                           | 98.5 (97.4 to 99.2)        | 99.1 (98.3 to 99.6)        | 99.2 (98.4 to 99.6)        | 99.4 (98.2 to 99.9)        | 0.0 (-0.0 to 0.0)                              | 0.3 (-0.5 to 0.7)                   |
| Virgin Islands, U.S.                          | 97.9 (96.2 to 98.9)        | 99.0 (98.0 to 99.6)        | 99.0 (98.0 to 99.6)        | 99.2 (97.8 to 99.8)        | 0.0 (-0.0 to 0.0)                              | 0.2 (-0.7 to 0.7)                   |
| <b>Central Latin America</b>                  |                            |                            |                            |                            |                                                |                                     |
| Colombia                                      | 88.4 (87.5 to 89.3)        | 96.7 (96.0 to 97.3)        | 97.2 (96.1 to 98.1)        | 99.0 (97.9 to 99.6)        | 0.2 (0.1 to 0.2)                               | 2.3 (1.7 to 2.9)                    |
| Costa Rica                                    | 98.3 (97.1 to 99.1)        | 99.2 (98.5 to 99.5)        | 99.2 (98.5 to 99.7)        | 99.2 (98.5 to 99.9)        | 0.0 (-0.0 to 0.1)                              | 0.5 (-0.0 to 0.8)                   |
| El Salvador                                   | 99.1 (98.8 to 99.3)        | 99.1 (98.7 to 99.4)        | 99.3 (98.8 to 99.6)        | 99.5 (98.6 to 99.8)        | 0.0 (-0.0 to 0.0)                              | 0.4 (-0.2 to 0.7)                   |
| Guatemala                                     | 50.4 (48.0 to 52.7)        | 96.7 (95.7 to 97.5)        | 96.1 (94.0 to 97.6)        | 98.9 (97.8 to 99.6)        | 0.1 (0.1 to 0.2)                               | 2.3 (1.8 to 2.8)                    |
| Honduras                                      | 60.0 (56.7 to 63.2)        | 96.8 (94.9 to 98.2)        | 96.3 (93.5 to 98.0)        | 98.2 (96.0 to 99.5)        | 0.1 (0.0 to 0.2)                               | 1.5 (0.6 to 2.4)                    |
| Mexico                                        | 90.7 (90.0 to 91.4)        | 98.3 (97.6 to 98.7)        | 98.3 (97.6 to 99.0)        | 99.3 (98.5 to 99.8)        | 0.1 (0.0 to 0.1)                               | 1.0 (0.5 to 1.5)                    |
| Nicaragua                                     | 91.2 (90.2 to 92.1)        | 95.8 (92.8 to 97.8)        | 96.3 (93.4 to 98.2)        | 98.2 (95.1 to 99.6)        | 0.2 (0.1 to 0.3)                               | 2.6 (1.2 to 4.2)                    |
| Panama                                        | 90.4 (88.8 to 91.7)        | 93.7 (90.9 to 95.9)        | 94.6 (91.2 to 97.1)        | 97.1 (92.1 to 99.2)        | 0.2 (0.0 to 0.3)                               | 3.6 (0.6 to 5.2)                    |
| Venezuela                                     | 97.0 (95.4 to 98.2)        | 97.7 (95.8 to 98.9)        | 97.9 (96.1 to 99.0)        | 98.5 (95.6 to 99.7)        | 0.1 (-0.1 to 0.1)                              | 0.8 (-0.9 to 1.9)                   |
| <b>Tropical Latin America</b>                 |                            |                            |                            |                            |                                                |                                     |
| Brazil                                        | 96.3 (94.9 to 97.5)        | 99.0 (98.0 to 99.5)        | 99.0 (98.1 to 99.6)        | 99.6 (98.8 to 99.9)        | 0.0 (0.0 to 0.1)                               | 0.6 (0.3 to 1.1)                    |
| Paraguay                                      | 79.6 (76.2 to 82.7)        | 93.4 (91.3 to 95.0)        | 93.6 (91.1 to 95.7)        | 97.0 (94.3 to 98.7)        | 0.3 (0.1 to 0.4)                               | 3.9 (1.8 to 5.8)                    |
| <b>North Africa and Middle East</b>           |                            |                            |                            |                            |                                                |                                     |
| <b>North Africa and Middle East</b>           |                            |                            |                            |                            |                                                |                                     |
| Afghanistan                                   | 27.1 (13.9 to 43.1)        | 57.9 (54.8 to 61.0)        | 62.1 (54.9 to 69.0)        | 84.5 (72.8 to 92.2)        | 2.5 (1.8 to 3.0)                               | 46.0 (30.9 to 57.1)                 |
| Algeria                                       | 88.0 (79.1 to 94.4)        | 96.6 (93.3 to 98.6)        | 97.0 (94.2 to 98.7)        | 98.9 (97.0 to 99.7)        | 0.2 (0.1 to 0.3)                               | 2.4 (1.0 to 4.5)                    |
| Bahrain                                       | 94.6 (89.9 to 97.7)        | 98.7 (97.2 to 99.5)        | 98.7 (97.4 to 99.5)        | 99.5 (98.6 to 99.9)        | 0.1 (0.0 to 0.1)                               | 0.9 (0.3 to 1.8)                    |
| Egypt                                         | 67.4 (66.0 to 68.6)        | 94.0 (92.6 to 95.1)        | 94.6 (92.5 to 96.4)        | 98.8 (97.5 to 99.5)        | 0.3 (0.3 to 0.4)                               | 5.1 (4.2 to 6.0)                    |
| Iran                                          | 95.6 (91.8 to 97.9)        | 98.4 (97.0 to 99.3)        | 98.6 (97.2 to 99.4)        | 99.3 (97.9 to 99.8)        | 0.1 (0.0 to 0.1)                               | 0.9 (0.3 to 1.8)                    |
| Iraq                                          | 72.2 (69.8 to 74.4)        | 93.0 (89.5 to 95.7)        | 92.7 (87.7 to 96.0)        | 96.8 (92.0 to 99.1)        | 0.3 (0.1 to 0.4)                               | 4.1 (1.9 to 5.9)                    |
| Jordan                                        | 98.3 (98.0 to 98.6)        | 99.5 (99.2 to 99.7)        | 99.6 (99.2 to 99.8)        | 99.8 (99.5 to 100.0)       | 0.0 (0.0 to 0.0)                               | 0.3 (0.1 to 0.4)                    |
| Kuwait                                        | 96.7 (94.5 to 98.3)        | 98.7 (97.8 to 99.2)        | 98.4 (98.4 to 99.9)        | 99.4 (98.4 to 99.9)        | 0.0 (0.0 to 0.1)                               | 0.7 (0.4 to 1.1)                    |
| Lebanon                                       | 53.0 (34.8 to 71.3)        | 87.6 (78.2 to 94.4)        | 88.5 (79.3 to 94.8)        | 96.4 (89.9 to 99.3)        | 0.6 (0.3 to 1.1)                               | 10.2 (4.5 to 18.8)                  |
| Libya                                         | 93.8 (88.3 to 97.1)        | 98.6 (97.1 to 99.4)        | 99.3 (98.0 to 99.4)        | 99.3 (98.0 to 99.8)        | 0.0 (0.0 to 0.1)                               | 0.7 (0.1 to 1.5)                    |
| Morocco                                       | 61.7 (59.6 to 63.8)        | 84.9 (73.3 to 92.8)        | 86.6 (76.1 to 94.1)        | 94.6 (85.0 to 99.0)        | 0.7 (0.4 to 1.3)                               | 11.6 (5.4 to 21.8)                  |
| Palestine                                     | 97.3 (97.2 to 97.5)        | 98.2 (97.2 to 99.0)        | 98.3 (98.0 to 99.3)        | 99.3 (98.0 to 99.8)        | 0.1 (0.0 to 0.1)                               | 1.1 (0.5 to 1.6)                    |
| Oman                                          | 96.8 (93.9 to 98.5)        | 99.1 (98.3 to 99.6)        | 99.2 (98.4 to 99.7)        | 99.6 (98.9 to 99.9)        | 0.0 (0.0 to 0.1)                               | 0.6 (0.2 to 1.1)                    |
| Qatar                                         | 96.8 (94.0 to 98.6)        | 99.5 (99.0 to 99.8)        | 99.5 (99.1 to 99.8)        | 99.8 (99.6 to 100.0)       | 0.0 (0.0 to 0.0)                               | 0.4 (0.2 to 0.7)                    |
| Saudi Arabia                                  | 92.4 (89.5 to 94.8)        | 98.2 (96.7 to 99.2)        | 98.5 (97.1 to 99.3)        | 99.5 (98.7 to 99.9)        | 0.1 (0.0 to 0.2)                               | 1.4 (0.7 to 2.5)                    |
| Sudan                                         | 67.5 (51.6 to 80.8)        | 79.6 (75.8 to 82.8)        | 83.5 (77.1 to 88.8)        | 91.7 (83.2 to 96.7)        | 0.9 (0.5 to 1.2)                               | 15.1 (7.9 to 19.7)                  |
| Syria                                         | 76.5 (74.8 to 78.2)        | 95.0 (90.7 to 97.8)        | 94.9 (89.5 to 97.8)        | 97.2 (91.5 to 99.8)        | 0.2 (-0.0 to 0.3)                              | 2.3 (-0.2 to 4.5)                   |
| Tunisia                                       | 92.1 (89.3 to 94.2)        | 98.8 (97.7 to 99.4)        | 98.8 (97.7 to 99.5)        | 99.6 (98.8 to 99.9)        | 0.1 (0.0 to 0.1)                               | 0.9 (0.5 to 1.5)                    |
| Turkey                                        | 83.1 (81.4 to 84.8)        | 96.9 (94.0 to 98.5)        | 97.4 (95.1 to 98.8)        | 99.3 (98.0 to 99.9)        | 0.2 (0.1 to 0.3)                               | 2.6 (1.3 to 4.6)                    |
| United Arab Emirates                          | 98.8 (97.5 to 99.5)        | 99.5 (99.0 to 99.8)        | 99.5 (99.1 to 99.8)        | 99.7 (99.2 to 100.0)       | 0.0 (-0.0 to 0.0)                              | 0.2 (-0.1 to 0.5)                   |
| Yemen                                         | 32.5 (25.6 to 39.1)        | 51.6 (44.6 to 58.3)        | 53.6 (42.1 to 65.3)        | 67.3 (45.7 to 85.7)        | 1.7 (0.0 to 2.8)                               | 30.0 (-0.7 to 52.1)                 |
| <b>South Asia</b>                             |                            |                            |                            |                            |                                                |                                     |
| <b>South Asia</b>                             |                            |                            |                            |                            |                                                |                                     |
| Bangladesh                                    | 11.6 (10.6 to 12.8)        | 47.9 (42.5 to 53.4)        | 50.8 (40.8 to 60.8)        | 80.3 (64.8 to 91.0)        | 3.4 (2.5 to 4.0)                               | 67.4 (46.3 to 82.5)                 |
| Bhutan                                        | 27.3 (15.9 to 41.2)        | 72.2 (62.3 to 80.6)        | 75.1 (64.1 to 84.6)        | 92.6 (82.3 to 98.0)        | 1.7 (1.3 to 2.1)                               | 28.5 (21.0 to 36.8)                 |
| India                                         | 49.9 (49.3 to 50.5)        | 85.2 (84.9 to 85.5)        | 85.4 (84.4 to 86.5)        | 96.1 (95.4 to 96.5)        | 0.8 (0.8 to 0.8)                               | 12.8 (12.1 to 13.4)                 |
| Nepal                                         | 13.2 (12.0 to 14.6)        | 62.4 (60.2 to 64.6)        | 67.4 (63.0 to 72.2)        | 93.6 (90.7 to 96.0)        | 2.7 (2.5 to 3.0)                               | 50.2 (45.0 to 55.8)                 |
| Pakistan                                      | 27.9 (22.9 to 33.4)        | 63.8 (54.4 to 72.2)        | 66.3 (52.8 to 72.2)        | 84.7 (65.2 to 94.9)        | 1.9 (1.1 to 2.4)                               | 32.7 (17.4 to 43.8)                 |
| <b>Southeast Asia, East Asia, and Oceania</b> |                            |                            |                            |                            |                                                |                                     |
| <b>East Asia</b>                              |                            |                            |                            |                            |                                                |                                     |
| China                                         | 78.0 (77.5 to 78.5)        | 98.5 (98.2 to 98.7)        | 98.6 (98.4 to 98.8)        | 99.8 (99.7 to 99.8)        | 0.1 (0.1 to 0.1)                               | 1.3 (1.2 to 1.5)                    |
| North Korea                                   | 82.4 (68.2 to 91.7)        | 89.8 (80.8 to 95.6)        | 90.4 (81.5 to 95.9)        | 93.1 (81.5 to 95.9)        | 0.2 (-0.2 to 0.6)                              | 3.7 (-3.5 to 9.9)                   |
| Taiwan (Province of China)                    | 98.3 (96.5 to 99.3)        | 99.6 (99.1 to 99.8)        | 99.6 (99.2 to 99.8)        | 99.8 (99.5 to 100.0)       | 0.0 (0.0 to 0.0)                               | 0.2 (0.1 to 0.5)                    |
| <b>Oceania</b>                                |                            |                            |                            |                            |                                                |                                     |
| American Samoa                                | 98.8 (97.7 to 99.5)        | 99.2 (98.4 to 99.7)        | 99.2 (98.4 to 99.7)        | 99.4 (98.4 to 99.9)        | 0.0 (-0.0 to 0.0)                              | 0.2 (-0.6 to 0.6)                   |
| Federated States of Micronesia                | 92.8 (89.4 to 95.3)        | 98.0 (96.2 to 99.2)        | 98.2 (96.6 to 99.3)        | 99.2 (97.8 to 99.8)        | 0.1 (0.0 to 0.2)                               | 1.2 (0.5 to 2.3)                    |
| Fiji                                          | 98.7 (97.5 to 99.4)        | 99.1 (98.2 to 99.6)        | 99.2 (98.4 to 99.6)        | 99.4 (98.1 to 99.9)        | 0.0 (-0.0 to 0.1)                              | 0.3 (-0.6 to 0.8)                   |
| Guam                                          | 99.1 (98.2 to 99.6)        | 98.9 (97.6 to 99.5)        | 98.8 (97.6 to 99.5)        | 98.6 (95.7 to 99.7)        | -0.0 (-0.1 to 0.0)                             | -0.3 (-2.1 to 0.5)                  |
| Kiribati                                      | 85.2 (79.0 to 90.0)        | 85.9 (78.5 to 91.4)        | 87.7 (80.1 to 93.3)        | 89.8 (76.6 to 97.2)        | 0.3 (-0.4 to 0.6)                              | 4.5 (-5.5 to 9.4)                   |
| Marshall Islands                              | 92.0 (87.7 to 94.8)        | 93.3 (90.0 to 95.8)        | 94.3 (90.4 to 97.0)        | 97.0 (91.8 to 99.2)        | 0.3 (0.1 to 0.4)                               | 4.0 (1.5 to 5.7)                    |
| Northern Mariana Islands                      | 99.1 (98.2 to 99.6)        | 99.2 (98.5 to 99.7)        | 99.2 (98.5 to 99.7)        | 99.2 (97.7 to 99.8)        | -0.0 (-0.1 to 0.0)                             | -0.0 (-1.0 to 0.4)                  |
| Papua New Guinea                              | 55.0 (46.0 to 63.8)        | 64.1 (48.1 to 78.5)        | 67.0 (49.7 to 81.5)        | 76.0 (46.5 to 93.8)        | 1.1 (-0.6 to 2.1)                              | 18.2 (-9.2 to 36.5)                 |

|                                                                                                                | Estimate in 2000 (95% UIs) | Estimate in 2015 (95% UIs) | Estimate in 2017 (95% UIs) | Estimate in 2030 (95% UIs) | Annualised rate of change, 2015-2030 (95% UIs) | Percent change, 2015-2030 (95% UIs) |
|----------------------------------------------------------------------------------------------------------------|----------------------------|----------------------------|----------------------------|----------------------------|------------------------------------------------|-------------------------------------|
| Samoa                                                                                                          | 80.0 (71.1 to 86.6)        | 82.1 (72.5 to 89.0)        | 83.4 (73.7 to 90.8)        | 85.5 (67.0 to 96.2)        | 0.3 (-0.7 to 0.6)                              | 4.0 (-10.1 to 10.1)                 |
| Solomon Islands                                                                                                | 86.4 (81.1 to 90.5)        | 93.0 (87.6 to 96.5)        | 93.7 (88.5 to 97.2)        | 96.7 (90.3 to 99.4)        | 0.3 (0.1 to 0.4)                               | 3.9 (1.3 to 6.8)                    |
| Tonga                                                                                                          | 92.7 (90.1 to 94.7)        | 98.6 (97.3 to 99.4)        | 98.7 (97.5 to 99.4)        | 99.5 (98.5 to 99.9)        | 0.1 (0.0 to 0.1)                               | 0.9 (0.5 to 1.5)                    |
| Vanuatu                                                                                                        | 86.2 (81.0 to 90.6)        | 85.0 (74.2 to 92.5)        | 86.5 (75.1 to 93.4)        | 88.7 (67.1 to 97.5)        | 0.3 (-0.8 to 0.7)                              | 4.2 (-11.0 to 11.4)                 |
| <b>Southeast Asia</b>                                                                                          |                            |                            |                            |                            |                                                |                                     |
| Cambodia                                                                                                       | 34.5 (32.6 to 36.6)        | 93.7 (92.0 to 95.2)        | 94.3 (91.3 to 96.4)        | 99.2 (98.1 to 99.7)        | 0.4 (0.3 to 0.5)                               | 5.8 (4.6 to 7.3)                    |
| Indonesia                                                                                                      | 59.7 (59.1 to 60.2)        | 88.0 (84.8 to 90.8)        | 88.6 (82.8 to 93.0)        | 96.0 (90.7 to 98.7)        | 0.6 (0.4 to 0.7)                               | 9.1 (6.3 to 11.3)                   |
| Laos                                                                                                           | 30.2 (27.5 to 33.3)        | 57.6 (45.8 to 69.5)        | 61.9 (47.2 to 75.9)        | 85.1 (65.2 to 95.8)        | 2.6 (1.8 to 3.3)                               | 48.2 (31.7 to 64.3)                 |
| Malaysia                                                                                                       | 94.0 (92.3 to 95.3)        | 99.3 (98.6 to 99.7)        | 99.4 (98.8 to 99.7)        | 99.8 (99.5 to 100.0)       | 0.0 (0.0 to 0.1)                               | 0.6 (0.3 to 1.1)                    |
| Maldives                                                                                                       | 73.8 (67.5 to 79.7)        | 99.0 (98.0 to 99.5)        | 99.0 (98.2 to 99.6)        | 99.8 (99.2 to 100.0)       | 0.1 (0.0 to 0.1)                               | 0.9 (0.4 to 1.6)                    |
| Mauritius                                                                                                      | 98.7 (97.6 to 99.3)        | 99.3 (98.6 to 99.7)        | 99.4 (98.7 to 99.7)        | 99.6 (98.7 to 99.9)        | 0.0 (-0.0 to 0.0)                              | 0.3 (-0.1 to 0.7)                   |
| Myanmar                                                                                                        | 70.4 (65.8 to 74.8)        | 70.3 (66.4 to 73.8)        | 76.2 (69.0 to 82.0)        | 85.1 (72.8 to 92.6)        | 1.3 (0.5 to 1.7)                               | 20.9 (7.4 to 28.5)                  |
| Philippines                                                                                                    | 60.2 (58.5 to 61.9)        | 74.1 (60.6 to 85.5)        | 76.4 (62.1 to 88.1)        | 84.9 (62.7 to 96.8)        | 0.9 (-0.1 to 1.5)                              | 14.4 (-1.3 to 25.7)                 |
| Sri Lanka                                                                                                      | 99.1 (98.3 to 99.6)        | 99.8 (99.7 to 99.9)        | 99.9 (99.8 to 99.9)        | 100.0 (99.9 to 100.0)      | 0.0 (0.0 to 0.0)                               | 0.1 (0.1 to 0.2)                    |
| Seychelles                                                                                                     | 94.8 (89.5 to 97.9)        | 97.7 (95.4 to 99.0)        | 98.0 (96.0 to 99.2)        | 98.9 (96.9 to 99.8)        | 0.1 (0.0 to 0.2)                               | 1.3 (0.3 to 2.8)                    |
| Thailand                                                                                                       | 94.5 (91.1 to 96.8)        | 99.2 (98.6 to 99.5)        | 99.2 (98.6 to 99.6)        | 99.8 (99.3 to 99.9)        | 0.0 (0.0 to 0.1)                               | 0.6 (0.4 to 0.9)                    |
| Timor-Leste                                                                                                    | 14.9 (13.6 to 16.3)        | 58.4 (56.0 to 60.5)        | 60.0 (55.2 to 64.5)        | 86.1 (80.6 to 90.6)        | 2.6 (2.1 to 3.0)                               | 47.6 (37.9 to 56.3)                 |
| Vietnam                                                                                                        | 84.3 (81.6 to 86.8)        | 95.8 (93.7 to 97.3)        | 96.5 (94.2 to 98.1)        | 98.9 (97.2 to 99.7)        | 0.2 (0.2 to 0.3)                               | 3.3 (2.3 to 4.5)                    |
| <b>Sub-Saharan Africa</b>                                                                                      |                            |                            |                            |                            |                                                |                                     |
| <b>Central Sub-Saharan Africa</b>                                                                              |                            |                            |                            |                            |                                                |                                     |
| Angola                                                                                                         | 46.9 (43.7 to 50.3)        | 52.1 (49.7 to 54.5)        | 57.7 (51.1 to 64.0)        | 69.2 (56.0 to 80.4)        | 1.9 (0.7 to 2.7)                               | 32.8 (10.5 to 50.8)                 |
| Central African Republic                                                                                       | 47.0 (45.4 to 48.7)        | 51.8 (38.0 to 66.2)        | 52.2 (36.5 to 68.2)        | 53.8 (27.2 to 81.6)        | 0.0 (-2.7 to 1.8)                              | 2.2 (-33.5 to 31.6)                 |
| Congo                                                                                                          | 83.3 (79.1 to 87.0)        | 94.8 (91.9 to 97.0)        | 95.2 (91.8 to 97.6)        | 97.8 (93.8 to 99.5)        | 0.2 (0.1 to 0.3)                               | 3.1 (1.3 to 4.8)                    |
| Democratic Republic of the Congo                                                                               | 47.1 (36.8 to 58.0)        | 60.5 (46.5 to 73.8)        | 64.9 (49.0 to 79.3)        | 75.5 (47.6 to 93.3)        | 1.4 (-0.1 to 2.4)                              | 24.5 (-2.0 to 42.5)                 |
| Equatorial Guinea                                                                                              | 65.6 (61.3 to 70.0)        | 95.1 (90.8 to 97.7)        | 95.9 (92.1 to 98.2)        | 99.2 (97.6 to 99.8)        | 0.3 (0.1 to 0.5)                               | 4.3 (2.1 to 7.8)                    |
| Gabon                                                                                                          | 86.6 (84.8 to 88.5)        | 93.4 (90.1 to 96.0)        | 94.5 (90.8 to 97.1)        | 97.1 (92.4 to 99.3)        | 0.3 (0.1 to 0.4)                               | 4.0 (1.5 to 5.8)                    |
| <b>Eastern Sub-Saharan Africa</b>                                                                              |                            |                            |                            |                            |                                                |                                     |
| Burundi                                                                                                        | 27.1 (23.7 to 30.4)        | 86.6 (85.6 to 87.6)        | 86.0 (83.6 to 88.2)        | 97.2 (96.0 to 98.2)        | 0.8 (0.7 to 0.9)                               | 12.3 (10.6 to 13.8)                 |
| Comoros                                                                                                        | 69.5 (66.1 to 72.8)        | 86.0 (80.1 to 91.0)        | 86.9 (78.9 to 92.8)        | 92.8 (82.0 to 98.2)        | 0.5 (0.1 to 0.7)                               | 7.8 (8.0 to 11.6)                   |
| Djibouti                                                                                                       | 89.5 (84.0 to 93.4)        | 95.5 (91.8 to 97.8)        | 96.1 (92.7 to 98.2)        | 97.9 (93.6 to 99.6)        | 0.2 (0.1 to 0.3)                               | 2.5 (1.1 to 4.0)                    |
| Eritrea                                                                                                        | 29.1 (27.1 to 31.2)        | 44.0 (26.5 to 62.7)        | 47.5 (29.6 to 67.0)        | 63.4 (31.6 to 89.4)        | 2.4 (-0.0 to 4.1)                              | 44.2 (-0.5 to 84.7)                 |
| Ethiopia                                                                                                       | 53.9 (50.6 to 7.0)         | 30.3 (28.0 to 32.4)        | 39.7 (34.1 to 45.2)        | 81.2 (73.3 to 86.6)        | 6.6 (6.0 to 7.1)                               | 168.8 (144.6 to 191.0)              |
| Kenya                                                                                                          | 42.4 (40.6 to 44.5)        | 69.1 (65.5 to 72.2)        | 72.6 (65.2 to 79.3)        | 87.8 (78.2 to 94.2)        | 1.6 (1.1 to 1.9)                               | 26.9 (17.3 to 33.2)                 |
| Madagascar                                                                                                     | 46.2 (43.7 to 48.8)        | 50.7 (34.8 to 66.8)        | 55.1 (37.9 to 71.6)        | 63.8 (32.5 to 88.4)        | 1.4 (-0.9 to 2.8)                              | 24.9 (-12.2 to 52.9)                |
| Malawi                                                                                                         | 54.8 (53.3 to 56.4)        | 91.0 (89.8 to 92.1)        | 91.4 (88.7 to 93.6)        | 97.9 (96.3 to 99.6)        | 0.5 (0.4 to 0.6)                               | 7.6 (6.4 to 8.7)                    |
| Mozambique                                                                                                     | 49.1 (47.5 to 50.8)        | 59.8 (47.9 to 71.1)        | 64.0 (49.0 to 77.5)        | 73.7 (46.9 to 91.8)        | 1.3 (-0.4 to 2.2)                              | 22.7 (-6.1 to 39.5)                 |
| Rwanda                                                                                                         | 26.0 (24.5 to 27.5)        | 92.5 (90.7 to 94.1)        | 92.2 (88.6 to 95.0)        | 98.2 (96.3 to 99.4)        | 0.4 (0.3 to 0.5)                               | 6.2 (5.1 to 7.4)                    |
| Somalia                                                                                                        | 32.9 (20.9 to 46.1)        | 46.7 (34.1 to 59.6)        | 48.3 (31.6 to 63.6)        | 59.9 (30.3 to 85.3)        | 1.5 (-1.1 to 3.0)                              | 26.9 (-15.7 to 58.0)                |
| South Sudan                                                                                                    | 26.5 (14.6 to 41.9)        | 43.0 (30.8 to 57.0)        | 43.3 (28.6 to 59.9)        | 54.1 (26.9 to 83.2)        | 1.3 (-1.5 to 3.2)                              | 24.0 (-19.9 to 60.7)                |
| Tanzania                                                                                                       | 42.8 (40.4 to 45.3)        | 70.3 (67.8 to 72.8)        | 71.8 (65.5 to 77.7)        | 86.1 (77.3 to 92.5)        | 1.3 (0.8 to 1.7)                               | 22.4 (12.4 to 29.8)                 |
| Uganda                                                                                                         | 38.9 (36.4 to 41.5)        | 76.8 (75.4 to 78.1)        | 78.9 (75.6 to 81.8)        | 93.2 (90.3 to 95.5)        | 1.3 (1.1 to 1.5)                               | 21.4 (17.4 to 24.8)                 |
| Zambia                                                                                                         | 44.0 (41.9 to 46.0)        | 74.3 (68.6 to 79.2)        | 77.1 (67.9 to 84.3)        | 90.7 (80.0 to 96.5)        | 1.3 (0.9 to 1.6)                               | 22.1 (14.7 to 27.7)                 |
| <b>Southern Sub-Saharan Africa</b>                                                                             |                            |                            |                            |                            |                                                |                                     |
| Botswana                                                                                                       | 92.3 (88.5 to 95.2)        | 97.4 (95.1 to 98.8)        | 97.8 (96.6 to 99.0)        | 99.0 (97.0 to 99.8)        | 0.1 (0.1 to 0.2)                               | 1.6 (0.8 to 2.9)                    |
| Lesotho                                                                                                        | 58.9 (56.6 to 61.3)        | 83.2 (79.5 to 86.3)        | 84.4 (78.0 to 89.4)        | 93.9 (87.2 to 97.7)        | 0.8 (0.5 to 1.0)                               | 12.8 (7.6 to 16.2)                  |
| Namibia                                                                                                        | 77.5 (75.3 to 79.7)        | 90.2 (86.8 to 93.0)        | 91.3 (86.4 to 94.8)        | 95.6 (91.3 to 98.7)        | 0.4 (0.1 to 0.5)                               | 6.0 (2.2 to 8.2)                    |
| South Africa                                                                                                   | 87.4 (84.8 to 89.7)        | 99.0 (98.1 to 99.5)        | 99.0 (98.0 to 99.6)        | 99.7 (99.2 to 100.0)       | 0.1 (0.0 to 0.1)                               | 0.8 (0.4 to 1.4)                    |
| Swaziland                                                                                                      | 75.7 (71.1 to 80.2)        | 90.0 (87.1 to 92.3)        | 90.9 (86.8 to 94.3)        | 96.0 (91.5 to 98.7)        | 0.4 (0.2 to 0.6)                               | 6.7 (3.7 to 8.7)                    |
| Zimbabwe                                                                                                       | 70.9 (68.3 to 73.3)        | 82.8 (80.7 to 84.7)        | 84.3 (79.3 to 88.4)        | 92.3 (86.3 to 96.3)        | 0.7 (0.4 to 0.9)                               | 11.6 (5.6 to 15.1)                  |
| <b>Western Sub-Saharan Africa</b>                                                                              |                            |                            |                            |                            |                                                |                                     |
| Benin                                                                                                          | 77.1 (75.3 to 79.0)        | 87.5 (84.8 to 89.8)        | 88.7 (86.8 to 92.2)        | 93.6 (86.8 to 97.3)        | 0.4 (0.1 to 0.6)                               | 7.0 (1.7 to 9.9)                    |
| Burkina Faso                                                                                                   | 43.0 (40.7 to 45.2)        | 76.1 (65.2 to 85.3)        | 76.1 (63.0 to 87.2)        | 87.0 (69.6 to 97.0)        | 0.9 (0.3 to 1.4)                               | 14.2 (3.8 to 22.5)                  |
| Cameroon                                                                                                       | 56.8 (54.7 to 58.9)        | 63.9 (59.8 to 68.3)        | 67.4 (58.6 to 75.7)        | 72.3 (54.9 to 87.7)        | 0.8 (-0.6 to 1.7)                              | 12.8 (-8.7 to 28.5)                 |
| Cape Verde                                                                                                     | 65.6 (53.0 to 76.8)        | 89.2 (79.9 to 95.1)        | 90.8 (82.7 to 95.9)        | 96.8 (91.0 to 99.3)        | 0.5 (0.3 to 1.0)                               | 8.6 (4.0 to 15.4)                   |
| Chad                                                                                                           | 14.0 (12.4 to 15.9)        | 23.6 (20.3 to 27.0)        | 26.1 (18.9 to 34.1)        | 38.0 (20.4 to 57.7)        | 3.0 (-0.3 to 5.3)                              | 59.6 (-4.8 to 120.8)                |
| Cote d'Ivoire                                                                                                  | 64.6 (62.3 to 66.8)        | 64.4 (52.7 to 74.7)        | 67.7 (52.8 to 79.5)        | 75.0 (48.4 to 91.4)        | 1.0 (-0.9 to 1.8)                              | 16.0 (-12.5 to 30.7)                |
| The Gambia                                                                                                     | 57.0 (52.6 to 61.5)        | 67.1 (60.3 to 73.7)        | 69.3 (58.4 to 78.8)        | 77.2 (56.9 to 90.6)        | 0.9 (-0.4 to 1.6)                              | 14.8 (-6.4 to 27.4)                 |
| Ghana                                                                                                          | 47.5 (45.2 to 49.8)        | 73.9 (69.1 to 77.9)        | 75.8 (67.5 to 82.9)        | 88.3 (77.5 to 95.1)        | 1.2 (0.6 to 1.5)                               | 19.5 (10.0 to 25.9)                 |
| Guinea                                                                                                         | 33.6 (31.1 to 36.2)        | 47.5 (37.5 to 58.0)        | 50.3 (36.9 to 64.2)        | 61.7 (35.9 to 84.4)        | 1.6 (-0.6 to 2.9)                              | 28.8 (-9.1 to 55.2)                 |
| Guinea-Bissau                                                                                                  | 37.7 (30.1 to 45.6)        | 45.4 (40.3 to 50.3)        | 47.7 (36.8 to 57.7)        | 56.4 (34.9 to 76.3)        | 1.3 (-1.1 to 2.9)                              | 23.5 (-15.3 to 55.4)                |
| Liberia                                                                                                        | 33.2 (25.6 to 41.1)        | 67.0 (59.8 to 73.5)        | 67.8 (56.4 to 77.6)        | 82.9 (66.5 to 93.5)        | 1.4 (0.5 to 1.9)                               | 23.7 (7.9 to 33.2)                  |
| Mali                                                                                                           | 33.7 (32.5 to 34.9)        | 50.0 (40.2 to 59.9)        | 54.0 (40.4 to 67.4)        | 66.8 (40.7 to 87.0)        | 1.8 (-0.1 to 3.0)                              | 32.8 (-1.0 to 55.9)                 |
| Mauritania                                                                                                     | 61.9 (58.9 to 65.0)        | 75.7 (66.9 to 83.8)        | 79.8 (69.7 to 88.2)        | 90.0 (76.7 to 97.2)        | 1.2 (0.7 to 1.5)                               | 18.9 (11.0 to 25.8)                 |
| Niger                                                                                                          | 16.6 (14.4 to 19.1)        | 36.8 (27.1 to 46.2)        | 38.2 (25.7 to 52.3)        | 57.0 (30.6 to 81.9)        | 2.8 (0.4 to 4.3)                               | 53.3 (5.5 to 89.4)                  |
| Nigeria                                                                                                        | 34.4 (32.0 to 37.0)        | 35.5 (34.0 to 37.1)        | 39.8 (35.6 to 43.5)        | 45.4 (36.0 to 53.9)        | 1.6 (0.0 to 2.8)                               | 27.8 (0.7 to 51.8)                  |
| Sao Tome and Principe                                                                                          | 81.3 (73.6 to 87.7)        | 88.5 (79.8 to 94.5)        | 90.1 (81.4 to 98.5)        | 94.0 (81.4 to 98.8)        | 0.4 (0.0 to 0.7)                               | 6.2 (0.2 to 10.9)                   |
| Senegal                                                                                                        | 59.5 (50.9 to 67.3)        | 58.1 (56.1 to 60.1)        | 61.4 (56.2 to 66.3)        | 63.9 (52.8 to 74.1)        | 0.6 (-0.6 to 1.6)                              | 9.9 (-9.0 to 26.5)                  |
| Sierra Leone                                                                                                   | 44.3 (40.4 to 48.3)        | 49.5 (42.8 to 56.8)        | 52.5 (41.5 to 64.5)        | 60.7 (38.1 to 81.8)        | 1.2 (-1.1 to 2.7)                              | 21.8 (-15.4 to 49.0)                |
| Togo                                                                                                           | 56.0 (52.3 to 59.9)        | 63.7 (56.7 to 70.5)        | 67.6 (56.2 to 77.8)        | 75.3 (53.8 to 90.1)        | 1.1 (-0.5 to 1.9)                              | 17.9 (-7.4 to 32.3)                 |
| <b>Indicator 3.2.1: Under-5 mortality rate (probability of dying before the age of 5 per 1,000 livebirths)</b> |                            |                            |                            |                            |                                                |                                     |
| <b>Central Europe, Eastern Europe, and Central Asia</b>                                                        |                            |                            |                            |                            |                                                |                                     |
| <b>Central Asia</b>                                                                                            |                            |                            |                            |                            |                                                |                                     |
| Armenia                                                                                                        | 27.4 (24.6 to 30.5)        | 10.1 (9.6 to 10.7)         | 9.6 (8.7 to 10.5)          | 6.4 (4.4 to 9.0)           | -3.2 (-5.5 to -0.9)                            | -36.9 (-56.4 to -12.9)              |
| Azerbaijan                                                                                                     | 64.6 (58.4 to 71.3)        | 37.5 (32.2 to 43.0)        | 35.2 (30.0 to 41.0)        | 25.0 (20.1 to 30.5)        | -2.7 (-3.6 to -1.8)                            | -33.3 (-42.0 to -23.2)              |
| Georgia                                                                                                        | 34.0 (30.9 to 37.6)        | 12.0 (10.1 to 14.0)        | 11.1 (9.3 to 13.1)         | 7.2 (5.4 to 9.6)           | -3.4 (-4.7 to -1.9)                            | -39.7 (-50.9 to -25.0)              |
| Kazakhstan                                                                                                     | 35.3 (31.6 to 39.7)        | 14.8 (12.5 to 17.7)        | 14.1 (11.8 to 17.2)        | 9.6 (6.8 to 13.4)          | -3.0 (-4.8 to -1.0)                            | -35.1 (-51.6 to -13.4)              |
| Kyrgyzstan                                                                                                     | 44.4 (40.2 to 49.2)        | 21.9 (21.3 to 22.5)        | 20.1 (18.9 to 21.5)        | 14.3 (13.1 to 15.7)        | -2.8 (-3.4 to -2.2)                            | -34.5 (-40.2 to -28.3)              |
| Mongolia                                                                                                       | 61.4 (56.5 to 66.8)        | 27.7 (23.9 to 32.5)        | 25.7 (21.9 to 30.8)        | 16.5 (13.0 to 21.5)        | -3.5 (-4.7 to -2.1)                            | -40.4 (-50.3 to -27.3)              |
| Tajikistan                                                                                                     | 71.9 (65.9 to 78.2)        | 49.2 (42.7 to 56.6)        | 46.9 (40.2 to 54.5)        | 29.0 (23.1 to 34.5)        | -3.6 (-4.7 to -2.2)                            | -41.2 (-50.4 to -27.9)              |
| Turkmenistan                                                                                                   | 55.9 (50.4 to 62.1)        | 31.6 (27.4 to 36.1)        | 29.1 (24.9 to 33.9)        | 17.8 (14.5 to 21.4)        | -3.8 (-4.7 to -3.1)                            | -43.7 (-50.8 to -37.0)              |

|                                    | Estimate in 2000 (95% UIs) | Estimate in 2015 (95% UIs) | Estimate in 2017 (95% UIs) | Estimate in 2030 (95% UIs) | Annualised rate of change, 2015-2030 (95% UIs) | Percent change, 2015-2030 (95% UIs) |
|------------------------------------|----------------------------|----------------------------|----------------------------|----------------------------|------------------------------------------------|-------------------------------------|
| Uzbekistan                         | 45.2 (40.5 to 50.5)        | 26.1 (22.0 to 30.8)        | 23.8 (20.1 to 28.8)        | 16.6 (13.0 to 21.4)        | -3.0 (-4.1 to -1.7)                            | -36.3 (-46.1 to -23.0)              |
| <b>Central Europe</b>              |                            |                            |                            |                            |                                                |                                     |
| Albania                            | 28.5 (25.6 to 31.5)        | 13.5 (11.4 to 16.2)        | 12.7 (10.5 to 15.2)        | 9.3 (6.7 to 12.7)          | -2.5 (-4.4 to -0.8)                            | -31.0 (-48.6 to -11.1)              |
| Bosnia and Herzegovina             | 16.0 (10.0 to 11.3)        | 6.9 (6.4 to 7.4)           | 6.9 (6.4 to 7.4)           | 4.8 (5.6 to 8.8)           | -2.6 (-4.2 to 1.5)                             | -30.4 (-47.0 to 26.0)               |
| Bulgaria                           | 16.9 (16.2 to 17.7)        | 8.0 (7.5 to 8.5)           | 7.7 (6.8 to 8.7)           | 5.1 (3.9 to 6.5)           | -3.0 (-4.9 to -1.4)                            | -36.0 (-51.9 to -18.5)              |
| Croatia                            | 8.2 (7.7 to 8.8)           | 4.7 (4.3 to 5.2)           | 4.3 (3.7 to 4.9)           | 3.0 (2.4 to 3.7)           | -3.1 (-4.4 to -1.6)                            | -36.8 (-48.7 to -20.7)              |
| Czech Republic                     | 5.2 (4.9 to 5.6)           | 3.1 (2.9 to 3.3)           | 2.9 (2.5 to 3.2)           | 2.0 (1.5 to 2.6)           | -2.9 (-4.8 to -1.1)                            | -34.4 (-51.4 to -14.8)              |
| Hungary                            | 10.5 (10.0 to 10.9)        | 5.6 (5.2 to 5.9)           | 4.8 (4.2 to 5.4)           | 3.2 (2.5 to 4.0)           | -3.7 (-5.2 to -2.0)                            | -42.0 (-53.9 to -26.0)              |
| Macedonia                          | 14.9 (14.0 to 15.9)        | 10.0 (9.3 to 10.8)         | 9.6 (8.5 to 10.9)          | 7.1 (5.2 to 10.0)          | -2.4 (-4.4 to -0.1)                            | -29.1 (-48.2 to -0.9)               |
| Montenegro                         | 14.2 (13.1 to 15.5)        | 4.1 (3.6 to 4.7)           | 4.0 (3.5 to 4.7)           | 2.7 (1.9 to 4.1)           | -2.8 (-5.0 to -0.1)                            | -32.8 (-52.4 to -1.5)               |
| Poland                             | 9.3 (9.1 to 9.6)           | 4.7 (4.5 to 4.8)           | 4.4 (4.0 to 4.9)           | 2.8 (2.1 to 3.5)           | -3.5 (-5.2 to -1.9)                            | -40.6 (-53.9 to -24.7)              |
| Romania                            | 22.3 (21.8 to 22.9)        | 9.3 (8.9 to 9.7)           | 8.7 (7.9 to 9.6)           | 4.8 (3.8 to 6.1)           | -4.4 (-6.1 to -2.7)                            | -47.9 (-59.9 to -33.5)              |
| Serbia                             | 16.0 (13.5 to 18.7)        | 5.2 (4.9 to 5.5)           | 5.0 (4.5 to 5.6)           | 3.6 (3.0 to 4.5)           | -2.4 (-3.8 to -0.8)                            | -30.0 (-43.5 to -11.9)              |
| Slovakia                           | 9.7 (9.1 to 10.2)          | 6.5 (6.1 to 7.0)           | 6.0 (5.3 to 6.7)           | 4.1 (3.4 to 5.0)           | -3.2 (-4.4 to -1.7)                            | -37.5 (-48.0 to -22.1)              |
| Slovenia                           | 5.3 (4.9 to 5.8)           | 2.3 (2.1 to 2.6)           | 2.2 (1.9 to 2.5)           | 1.5 (1.2 to 1.9)           | -3.0 (-4.4 to -1.5)                            | -35.6 (-48.5 to -19.8)              |
| <b>Eastern Europe</b>              |                            |                            |                            |                            |                                                |                                     |
| Belarus                            | 17.7 (15.5 to 20.0)        | 7.0 (6.0 to 8.2)           | 6.5 (5.5 to 7.8)           | 3.7 (2.8 to 4.9)           | -4.3 (-5.9 to -2.5)                            | -47.1 (-58.5 to -31.7)              |
| Estonia                            | 11.0 (10.2 to 11.9)        | 3.3 (2.9 to 3.8)           | 3.0 (2.6 to 3.5)           | 2.5 (1.4 to 4.0)           | -2.2 (-5.8 to 1.1)                             | -25.7 (-58.1 to 18.6)               |
| Latvia                             | 13.4 (12.6 to 14.2)        | 5.2 (4.7 to 5.7)           | 4.9 (4.3 to 5.5)           | 3.0 (2.0 to 4.5)           | -3.7 (-6.2 to -1.1)                            | -41.8 (-60.6 to -15.5)              |
| Lithuania                          | 10.6 (10.1 to 11.2)        | 5.1 (4.7 to 5.5)           | 4.8 (4.3 to 5.4)           | 3.3 (2.3 to 4.3)           | -3.0 (-5.3 to -1.1)                            | -35.4 (-54.8 to -14.9)              |
| Moldova                            | 29.1 (26.4 to 32.2)        | 15.8 (13.3 to 18.2)        | 14.4 (12.3 to 16.8)        | 11.1 (7.5 to 15.8)         | -2.5 (-4.8 to 0.0)                             | -30.0 (-51.6 to -3.3)               |
| Russia                             | 19.5 (19.2 to 19.7)        | 8.1 (8.0 to 8.2)           | 7.4 (7.0 to 7.8)           | 4.7 (3.7 to 5.8)           | -3.7 (-5.2 to -2.2)                            | -42.3 (-53.9 to -28.0)              |
| Ukraine                            | 14.9 (14.6 to 15.2)        | 10.4 (10.2 to 10.7)        | 9.5 (8.9 to 10.1)          | 7.4 (5.6 to 9.6)           | -2.4 (-4.1 to -0.5)                            | -29.5 (-45.9 to -7.2)               |
| <b>High-income</b>                 |                            |                            |                            |                            |                                                |                                     |
| <b>Australasia</b>                 |                            |                            |                            |                            |                                                |                                     |
| Australia                          | 6.3 (6.1 to 6.6)           | 4.0 (3.8 to 4.2)           | 3.9 (3.3 to 4.5)           | 3.1 (2.5 to 3.7)           | -1.9 (-3.0 to -0.6)                            | -24.0 (-36.6 to -9.0)               |
| New Zealand                        | 7.7 (7.2 to 8.2)           | 5.1 (4.7 to 5.5)           | 4.5 (3.9 to 5.1)           | 3.4 (2.6 to 4.4)           | -2.7 (-4.5 to -0.9)                            | -32.2 (-48.7 to -12.0)              |
| <b>High-income Asia Pacific</b>    |                            |                            |                            |                            |                                                |                                     |
| Brunei                             | 9.8 (9.0 to 10.5)          | 9.6 (8.6 to 10.6)          | 9.0 (7.9 to 10.3)          | 8.8 (6.3 to 11.7)          | -0.6 (-2.7 to 1.2)                             | -7.9 (-33.4 to 20.5)                |
| Japan                              | 4.4 (4.3 to 4.5)           | 2.7 (2.6 to 2.8)           | 2.6 (2.2 to 3.0)           | 1.9 (1.6 to 2.3)           | -2.4 (-3.6 to -1.1)                            | -29.7 (-42.1 to -15.2)              |
| South Korea                        | 6.6 (6.4 to 6.7)           | 3.4 (3.3 to 3.5)           | 3.3 (3.0 to 3.5)           | 3.1 (1.9 to 15.9)          | -1.6 (-4.2 to 10.3)                            | -9.6 (-46.4 to 368.4)               |
| Singapore                          | 3.3 (3.1 to 3.6)           | 2.0 (1.9 to 2.2)           | 1.9 (1.7 to 2.2)           | 1.5 (1.2 to 1.8)           | -2.2 (-3.5 to -0.9)                            | -27.6 (-40.4 to -13.2)              |
| <b>High-income North America</b>   |                            |                            |                            |                            |                                                |                                     |
| Canada                             | 6.0 (5.8 to 6.3)           | 5.5 (5.4 to 5.8)           | 5.4 (4.9 to 6.0)           | 4.7 (3.9 to 5.6)           | -1.1 (-2.4 to 0.1)                             | -14.7 (-29.7 to 1.2)                |
| Greenland                          | 19.4 (17.2 to 21.8)        | 14.7 (13.8 to 17.0)        | 13.8 (11.8 to 16.2)        | 10.6 (8.3 to 13.6)         | -2.2 (-3.5 to -0.8)                            | -27.7 (-40.8 to -10.8)              |
| United States                      | 8.3 (8.2 to 8.4)           | 6.9 (6.8 to 7.0)           | 6.7 (6.1 to 7.4)           | 5.7 (4.8 to 6.7)           | -1.3 (-2.4 to -0.2)                            | -17.2 (-30.7 to -3.3)               |
| <b>Southern Latin America</b>      |                            |                            |                            |                            |                                                |                                     |
| Argentina                          | 19.4 (19.0 to 19.7)        | 11.3 (11.1 to 11.5)        | 10.9 (9.5 to 12.6)         | 8.3 (6.9 to 9.9)           | -2.1 (-3.3 to -0.9)                            | -26.6 (-38.9 to -12.8)              |
| Chile                              | 11.4 (11.0 to 11.8)        | 8.0 (7.7 to 8.3)           | 7.3 (6.3 to 8.4)           | 5.8 (4.7 to 7.2)           | -2.2 (-3.5 to -0.7)                            | -27.2 (-40.8 to -10.2)              |
| Uruguay                            | 16.4 (15.6 to 17.2)        | 9.0 (8.4 to 9.7)           | 9.1 (7.8 to 10.6)          | 6.9 (5.3 to 8.8)           | -1.8 (-3.4 to -0.1)                            | -23.2 (-40.3 to -1.3)               |
| <b>Western Europe</b>              |                            |                            |                            |                            |                                                |                                     |
| Andorra                            | 3.4 (2.9 to 4.1)           | 1.9 (1.6 to 2.3)           | 1.9 (1.6 to 2.3)           | 1.6 (1.0 to 2.4)           | -1.5 (-3.8 to 1.2)                             | -18.8 (-43.4 to 20.0)               |
| Austria                            | 5.6 (5.3 to 6.0)           | 3.6 (3.4 to 3.9)           | 3.4 (3.0 to 3.9)           | 2.5 (2.1 to 3.1)           | -2.4 (-3.8 to -1.0)                            | -30.1 (-43.1 to -14.0)              |
| Belgium                            | 6.0 (5.7 to 6.3)           | 3.9 (3.7 to 4.2)           | 3.6 (3.2 to 4.1)           | 2.8 (2.4 to 3.3)           | -2.2 (-3.4 to -1.1)                            | -28.3 (-39.8 to -14.6)              |
| Cyprus                             | 7.2 (6.6 to 7.8)           | 3.1 (2.8 to 3.4)           | 2.9 (2.6 to 3.3)           | 2.4 (1.6 to 2.9)           | -2.4 (-4.2 to -0.6)                            | -22.9 (-46.9 to -9.0)               |
| Denmark                            | 5.6 (5.2 to 6.0)           | 4.1 (3.8 to 4.4)           | 3.8 (3.3 to 4.3)           | 3.0 (2.5 to 3.6)           | -2.2 (-3.3 to -0.9)                            | -27.5 (-39.0 to -12.6)              |
| Finland                            | 4.3 (4.0 to 4.6)           | 2.2 (2.0 to 2.4)           | 2.2 (1.9 to 2.5)           | 1.8 (1.4 to 2.2)           | -1.5 (-3.0 to -0.0)                            | -19.7 (-36.2 to -0.4)               |
| France                             | 5.5 (5.3 to 5.6)           | 4.1 (4.0 to 4.2)           | 3.9 (3.5 to 4.3)           | 2.9 (2.3 to 3.1)           | -2.2 (-3.3 to -1.0)                            | -27.9 (-39.1 to -13.6)              |
| Germany                            | 5.3 (5.2 to 5.5)           | 4.0 (3.9 to 4.2)           | 3.6 (3.1 to 4.2)           | 2.7 (2.2 to 3.1)           | -2.8 (-3.8 to -1.7)                            | -34.0 (-43.6 to -23.0)              |
| Greece                             | 6.3 (5.9 to 6.6)           | 4.7 (4.4 to 5.0)           | 4.5 (4.0 to 5.0)           | 3.0 (2.4 to 3.8)           | -2.9 (-4.4 to -1.5)                            | -34.9 (-48.0 to -20.6)              |
| Iceland                            | 4.0 (3.5 to 4.5)           | 2.3 (2.0 to 2.7)           | 2.2 (1.9 to 2.6)           | 1.7 (1.3 to 2.1)           | -2.3 (-3.6 to -1.1)                            | -29.1 (-41.3 to -15.3)              |
| Ireland                            | 7.0 (6.6 to 7.5)           | 3.8 (3.5 to 4.1)           | 3.4 (3.0 to 3.9)           | 2.9 (2.3 to 3.6)           | -1.9 (-3.4 to -0.3)                            | -24.6 (-39.7 to -4.0)               |
| Israel                             | 6.8 (6.5 to 7.2)           | 3.9 (3.6 to 4.1)           | 3.6 (3.2 to 4.0)           | 2.5 (1.9 to 3.6)           | -2.9 (-4.8 to -0.5)                            | -34.4 (-51.1 to -7.5)               |
| Italy                              | 5.4 (5.2 to 5.6)           | 3.5 (3.3 to 3.6)           | 3.2 (2.9 to 3.6)           | 2.4 (2.0 to 2.9)           | -2.4 (-3.6 to -1.1)                            | -30.0 (-41.5 to -15.1)              |
| Luxembourg                         | 4.8 (4.2 to 5.3)           | 2.3 (2.0 to 2.7)           | 2.1 (1.8 to 2.5)           | 1.8 (1.3 to 2.3)           | -2.0 (-3.9 to -0.3)                            | -24.9 (-44.0 to -4.1)               |
| Malta                              | 7.5 (6.8 to 8.3)           | 6.3 (5.6 to 7.2)           | 6.0 (5.2 to 6.9)           | 4.1 (3.3 to 5.1)           | -2.9 (-4.1 to -1.7)                            | -35.2 (-45.7 to -22.9)              |
| Netherlands                        | 6.3 (6.0 to 6.6)           | 3.9 (3.7 to 4.1)           | 3.9 (3.5 to 4.4)           | 3.1 (2.7 to 3.7)           | -1.4 (-2.4 to -0.1)                            | -18.6 (-30.7 to -1.4)               |
| Norway                             | 4.9 (4.5 to 5.2)           | 2.8 (2.6 to 3.1)           | 2.6 (2.3 to 3.0)           | 2.1 (1.7 to 2.5)           | -2.0 (-3.2 to -0.8)                            | -25.7 (-38.1 to -10.9)              |
| Portugal                           | 7.3 (6.9 to 7.7)           | 3.6 (3.4 to 3.9)           | 3.4 (3.0 to 3.9)           | 2.3 (1.7 to 3.0)           | -3.2 (-5.0 to -1.3)                            | -37.1 (-52.6 to -17.4)              |
| Spain                              | 5.5 (5.3 to 5.7)           | 3.2 (3.1 to 3.4)           | 3.2 (2.9 to 3.6)           | 2.3 (1.9 to 2.7)           | -2.4 (-3.6 to -1.1)                            | -30.3 (-42.1 to -15.8)              |
| Sweden                             | 3.9 (3.6 to 4.2)           | 2.9 (2.7 to 3.1)           | 2.7 (2.4 to 3.1)           | 2.1 (1.8 to 2.5)           | -2.1 (-3.3 to -1.0)                            | -26.8 (-38.6 to -13.3)              |
| Switzerland                        | 5.8 (5.5 to 6.2)           | 4.4 (4.1 to 4.7)           | 3.8 (3.4 to 4.3)           | 3.1 (2.5 to 3.7)           | -2.4 (-3.8 to -1.1)                            | -30.3 (-43.8 to -15.5)              |
| United Kingdom                     | 6.5 (6.1 to 7.0)           | 4.5 (4.3 to 4.6)           | 4.5 (4.0 to 4.9)           | 3.4 (2.9 to 3.9)           | -1.9 (-2.8 to -0.9)                            | -24.1 (-33.9 to -12.4)              |
| <b>Latin America and Caribbean</b> |                            |                            |                            |                            |                                                |                                     |
| <b>Andean Latin America</b>        |                            |                            |                            |                            |                                                |                                     |
| Bolivia                            | 71.3 (65.4 to 77.1)        | 32.9 (27.8 to 38.6)        | 29.6 (24.8 to 35.2)        | 19.4 (15.9 to 23.3)        | -3.5 (-4.2 to -2.8)                            | -41.1 (-47.1 to -34.2)              |
| Ecuador                            | 34.6 (30.2 to 39.1)        | 18.6 (15.5 to 21.9)        | 17.5 (14.6 to 21.0)        | 12.7 (10.1 to 15.8)        | -2.5 (-3.8 to -1.2)                            | -31.3 (-43.5 to -17.1)              |
| Peru                               | 38.6 (35.6 to 41.9)        | 16.6 (13.9 to 19.4)        | 15.5 (12.9 to 18.6)        | 10.4 (7.8 to 13.5)         | -3.2 (-4.6 to -1.6)                            | -37.1 (-49.9 to -21.4)              |
| <b>Caribbean</b>                   |                            |                            |                            |                            |                                                |                                     |
| Antigua and Barbuda                | 14.9 (12.7 to 17.2)        | 11.4 (9.6 to 13.6)         | 11.1 (9.3 to 13.3)         | 8.9 (6.6 to 11.5)          | -1.7 (-3.4 to -0.2)                            | -22.5 (-40.2 to -3.1)               |
| The Bahamas                        | 15.1 (13.1 to 17.2)        | 13.2 (11.2 to 15.7)        | 12.5 (10.5 to 15.3)        | 10.5 (8.4 to 13.2)         | -1.6 (-2.6 to -0.4)                            | -20.7 (-32.4 to -6.1)               |
| Barbados                           | 14.9 (12.8 to 17.2)        | 13.2 (11.0 to 15.6)        | 13.0 (10.9 to 15.6)        | 11.2 (8.8 to 14.0)         | -1.2 (-2.2 to -0.1)                            | -15.7 (-27.7 to -1.2)               |
| Belize                             | 27.9 (25.3 to 30.7)        | 18.5 (16.0 to 21.5)        | 17.9 (15.3 to 21.2)        | 13.2 (10.3 to 16.7)        | -2.3 (-3.5 to -1.2)                            | -28.6 (-40.5 to -16.8)              |
| Bermuda                            | 5.8 (4.9 to 6.8)           | 5.3 (4.5 to 6.3)           | 5.1 (4.3 to 6.2)           | 4.4 (1.7 to 11.2)          | -1.9 (-7.6 to 4.6)                             | -18.2 (-68.1 to 100.2)              |
| Cuba                               | 8.6 (8.2 to 9.0)           | 5.8 (5.4 to 6.1)           | 5.2 (4.4 to 6.0)           | 3.9 (3.2 to 4.8)           | -2.6 (-3.9 to -1.3)                            | -31.6 (-44.1 to -17.6)              |
| Dominica                           | 19.3 (16.7 to 22.2)        | 30.5 (25.9 to 35.5)        | 30.3 (25.6 to 36.0)        | 30.7 (18.4 to 43.9)        | -0.1 (-3.3 to 2.2)                             | 0.8 (-39.1 to 39.3)                 |
| Dominican Republic                 | 41.8 (38.0 to 45.7)        | 29.2 (24.2 to 35.3)        | 29.2 (24.2 to 35.3)        | 20.6 (15.6 to 26.2)        | -2.8 (-4.4 to -1.2)                            | -33.9 (-48.1 to -17.0)              |
| Grenada                            | 17.1 (14.9 to 19.7)        | 15.1 (12.9 to 17.7)        | 14.4 (12.2 to 17.0)        | 12.0 (8.1 to 16.5)         | -1.6 (-3.8 to 0.3)                             | -20.3 (-43.1 to 4.0)                |
| Guyana                             | 38.1 (35.0 to 41.3)        | 26.5 (22.0 to 30.5)        | 24.8 (21.1 to 29.2)        | 15.8 (10.4 to 19.2)        | -3.5 (-5.9 to -1.9)                            | -40.5 (-59.0 to -25.0)              |
| Haiti                              | 102.9 (95.1 to 111.3)      | 65.2 (55.9 to 76.6)        | 59.3 (50.1 to 70.2)        | 36.8 (27.4 to 46.4)        | -3.9 (-5.4 to -2.8)                            | -43.6 (-55.6 to -34.2)              |

|                                               | Estimate in 2000 (95% UIs) | Estimate in 2015 (95% UIs) | Estimate in 2017 (95% UIs) | Estimate in 2030 (95% UIs) | Annualized rate of change, 2015-2030 (95% UIs) | Percent change, 2015-2030 (95% UIs) |
|-----------------------------------------------|----------------------------|----------------------------|----------------------------|----------------------------|------------------------------------------------|-------------------------------------|
| Jamaica                                       | 19.9 (17.1 to 22.9)        | 15.1 (12.7 to 18.0)        | 14.5 (12.1 to 17.5)        | 12.3 (9.0 to 15.3)         | -1.3 (-2.3 to -0.5)                            | -18.2 (-28.7 to -7.7)               |
| Puerto Rico                                   | 11.0 (10.4 to 11.6)        | 7.5 (6.9 to 8.1)           | 10.0 (9.1 to 11.1)         | 7.5 (6.0 to 9.1)           | 0.0 (-0.5 to 0.6)                              | 0.8 (-20.1 to 27.7)                 |
| Saint Lucia                                   | 18.4 (15.9 to 21.2)        | 14.7 (12.4 to 17.4)        | 13.8 (11.5 to 16.4)        | 9.8 (7.1 to 13.1)          | -2.8 (-4.5 to -1.0)                            | -33.3 (-49.2 to -14.0)              |
| Saint Vincent and the Grenadines              | 24.0 (20.8 to 27.5)        | 17.5 (14.8 to 19.6)        | 16.5 (13.9 to 19.6)        | 11.8 (8.8 to 15.3)         | -2.7 (-4.3 to -1.4)                            | -32.8 (-47.5 to -18.9)              |
| Suriname                                      | 42.4 (37.4 to 47.8)        | 29.5 (25.1 to 34.6)        | 28.7 (24.3 to 33.9)        | 23.7 (18.9 to 28.9)        | -1.5 (-2.6 to -0.5)                            | -19.5 (-32.1 to -7.3)               |
| Trinidad and Tobago                           | 25.9 (22.5 to 29.6)        | 16.8 (13.8 to 20.1)        | 16.6 (13.8 to 20.1)        | 13.7 (10.8 to 17.1)        | -1.4 (-2.4 to -0.2)                            | -18.3 (-30.2 to -3.3)               |
| Virgin Islands, U.S.                          | 11.5 (10.3 to 12.9)        | 8.6 (7.2 to 10.1)          | 8.6 (7.2 to 10.2)          | 5.7 (4.5 to 7.2)           | -2.8 (-4.1 to -1.5)                            | -33.6 (-45.9 to -20.5)              |
| <b>Central Latin America</b>                  |                            |                            |                            |                            |                                                |                                     |
| Colombia                                      | 25.6 (23.3 to 28.1)        | 15.3 (13.0 to 17.8)        | 14.2 (12.1 to 16.8)        | 10.2 (8.4 to 12.5)         | -2.7 (-3.6 to -1.7)                            | -33.5 (-42.1 to -22.8)              |
| Costa Rica                                    | 12.4 (11.8 to 13.0)        | 8.8 (7.9 to 9.9)           | 8.1 (6.8 to 9.6)           | 6.1 (4.9 to 7.4)           | -2.5 (-3.8 to -1.3)                            | -31.0 (-43.0 to -17.9)              |
| El Salvador                                   | 28.4 (25.7 to 31.3)        | 14.4 (12.3 to 16.6)        | 12.4 (10.4 to 14.8)        | 8.4 (6.3 to 12.4)          | -3.6 (-5.2 to -1.1)                            | -41.2 (-54.2 to -15.4)              |
| Guatemala                                     | 50.1 (45.5 to 54.9)        | 27.3 (23.7 to 31.5)        | 24.6 (20.8 to 29.1)        | 17.6 (13.5 to 22.5)        | -3.0 (-4.3 to -1.4)                            | -35.4 (-47.5 to -19.4)              |
| Honduras                                      | 36.3 (32.4 to 40.3)        | 16.4 (14.0 to 19.2)        | 14.6 (12.1 to 17.5)        | 10.3 (8.2 to 13.4)         | -3.2 (-4.2 to -1.4)                            | -37.5 (-47.0 to -19.0)              |
| Mexico                                        | 25.0 (22.3 to 28.1)        | 16.4 (13.9 to 18.9)        | 15.7 (13.3 to 18.6)        | 11.2 (9.2 to 13.4)         | -2.6 (-3.4 to -1.8)                            | -31.7 (-40.0 to -23.3)              |
| Nicaragua                                     | 35.7 (32.5 to 39.2)        | 17.5 (15.0 to 20.6)        | 15.2 (12.9 to 18.2)        | 10.3 (7.2 to 16.6)         | -3.6 (-5.4 to -0.5)                            | -40.9 (-55.7 to -7.9)               |
| Panama                                        | 23.6 (20.5 to 27.5)        | 18.0 (15.2 to 21.0)        | 17.2 (14.5 to 20.4)        | 13.1 (10.5 to 16.1)        | -2.1 (-3.1 to -1.1)                            | -27.2 (-37.4 to -15.8)              |
| Venezuela                                     | 22.6 (22.2 to 23.0)        | 15.9 (14.4 to 17.4)        | 15.6 (13.2 to 18.4)        | 12.8 (10.3 to 15.8)        | -1.5 (-2.8 to -0.1)                            | -19.7 (-33.9 to -1.2)               |
| <b>Tropical Latin America</b>                 |                            |                            |                            |                            |                                                |                                     |
| Brazil                                        | 41.4 (37.8 to 45.1)        | 19.8 (17.0 to 22.9)        | 18.4 (15.6 to 21.6)        | 13.5 (11.4 to 16.0)        | -2.6 (-3.2 to -1.9)                            | -31.8 (-38.4 to -24.7)              |
| Paraguay                                      | 28.7 (25.9 to 32.0)        | 15.1 (13.0 to 17.5)        | 14.0 (11.9 to 16.4)        | 10.2 (8.0 to 12.7)         | -2.7 (-3.8 to -1.5)                            | -32.7 (-43.6 to -20.7)              |
| <b>North Africa and Middle East</b>           |                            |                            |                            |                            |                                                |                                     |
| <b>North Africa and Middle East</b>           |                            |                            |                            |                            |                                                |                                     |
| Algeria                                       | 120.5 (110.9 to 131.6)     | 60.5 (52.3 to 69.1)        | 54.1 (46.4 to 62.8)        | 36.9 (29.2 to 45.8)        | -3.3 (-4.4 to -2.0)                            | -39.1 (-48.4 to -26.3)              |
| Algeria                                       | 33.7 (31.1 to 36.4)        | 25.9 (23.0 to 27.9)        | 22.8 (20.6 to 25.1)        | 16.0 (11.7 to 21.1)        | -3.3 (-5.2 to -1.4)                            | -38.4 (-54.4 to -19.0)              |
| Bahrain                                       | 11.7 (11.1 to 12.5)        | 7.9 (7.1 to 8.7)           | 7.3 (6.5 to 8.3)           | 5.9 (3.4 to 9.0)           | -2.1 (-5.5 to 0.9)                             | -24.8 (-56.3 to 15.1)               |
| Egypt                                         | 44.4 (40.0 to 49.1)        | 23.6 (19.8 to 27.6)        | 19.2 (16.0 to 23.1)        | 9.9 (7.4 to 13.1)          | -5.8 (-7.5 to -4.1)                            | -57.8 (-67.4 to -45.6)              |
| Iran                                          | 39.6 (34.6 to 45.1)        | 20.0 (19.8 to 20.2)        | 14.4 (13.8 to 14.9)        | 9.6 (7.4 to 12.2)          | -5.0 (-6.7 to -3.3)                            | -52.1 (-63.2 to -39.1)              |
| Iraq                                          | 41.4 (38.3 to 44.9)        | 26.6 (23.3 to 30.4)        | 25.1 (21.9 to 28.7)        | 18.7 (15.3 to 25.1)        | -2.4 (-3.4 to -0.5)                            | -29.8 (-39.6 to -6.6)               |
| Jordan                                        | 27.6 (25.2 to 30.0)        | 15.3 (13.1 to 18.1)        | 14.4 (12.2 to 17.3)        | 10.5 (8.7 to 12.7)         | -2.5 (-3.2 to -1.8)                            | -31.5 (-38.4 to -23.7)              |
| Kuwait                                        | 11.7 (11.1 to 12.4)        | 9.0 (8.4 to 9.6)           | 7.8 (6.7 to 9.0)           | 5.9 (3.7 to 9.0)           | -3.0 (-5.6 to 0.6)                             | -34.8 (-57.0 to 8.7)                |
| Lebanon                                       | 17.6 (15.2 to 20.6)        | 8.6 (7.3 to 10.2)          | 8.1 (6.8 to 9.8)           | 6.6 (4.5 to 17.8)          | -2.2 (-4.0 to 4.7)                             | -23.5 (-44.7 to 103.7)              |
| Libya                                         | 26.4 (23.8 to 30.4)        | 14.3 (11.9 to 17.1)        | 14.3 (12.1 to 17.3)        | 9.7 (5.9 to 14.6)          | -2.8 (-5.7 to 0.1)                             | -31.9 (-57.7 to -2.0)               |
| Morocco                                       | 45.7 (40.8 to 50.8)        | 22.1 (18.2 to 26.5)        | 19.7 (16.3 to 23.9)        | 12.4 (9.6 to 15.5)         | -3.9 (-5.2 to -2.9)                            | -43.9 (-53.8 to -35.6)              |
| Palestine                                     | 29.6 (27.4 to 31.9)        | 15.3 (13.3 to 17.4)        | 13.6 (11.7 to 15.7)        | 10.9 (6.6 to 30.2)         | -2.7 (-5.3 to 4.7)                             | -28.5 (-54.9 to 101.6)              |
| Oman                                          | 16.3 (14.3 to 18.4)        | 11.2 (10.7 to 11.8)        | 10.6 (9.9 to 11.3)         | 7.5 (3.8 to 14.2)          | -3.0 (-7.3 to 1.6)                             | -32.8 (-66.7 to 27.1)               |
| Qatar                                         | 14.3 (12.6 to 16.2)        | 7.9 (6.8 to 9.3)           | 7.4 (6.2 to 8.7)           | 5.0 (4.0 to 6.2)           | -3.1 (-4.2 to -2.1)                            | -36.8 (-46.5 to -26.6)              |
| Saudi Arabia                                  | 26.5 (21.9 to 31.8)        | 9.2 (7.6 to 11.2)          | 7.9 (6.6 to 9.8)           | 3.4 (1.9 to 5.2)           | -6.9 (-10.4 to -3.9)                           | -63.4 (-79.0 to -44.3)              |
| Sudan                                         | 97.3 (89.7 to 105.6)       | 52.8 (46.1 to 60.9)        | 47.7 (40.9 to 56.4)        | 31.2 (24.5 to 39.6)        | -3.5 (-4.8 to -2.3)                            | -40.9 (-51.6 to -29.5)              |
| Syria                                         | 20.2 (19.8 to 20.6)        | 24.4 (22.8 to 26.2)        | 19.8 (18.2 to 21.6)        | 14.6 (9.1 to 28.6)         | -3.6 (-6.6 to 1.0)                             | -39.9 (-62.9 to 17.0)               |
| Tunisia                                       | 26.8 (23.8 to 29.9)        | 12.0 (10.0 to 14.3)        | 10.5 (8.8 to 12.6)         | 6.9 (5.1 to 9.0)           | -3.8 (-5.5 to -2.3)                            | -42.8 (-56.0 to -28.9)              |
| Turkey                                        | 40.1 (36.0 to 44.3)        | 16.6 (14.1 to 19.7)        | 14.2 (12.0 to 16.7)        | 8.5 (6.3 to 11.4)          | -4.5 (-6.2 to -2.7)                            | -48.7 (-60.8 to -33.1)              |
| United Arab Emirates                          | 10.5 (10.0 to 11.1)        | 8.0 (6.7 to 9.5)           | 7.1 (6.0 to 8.7)           | 4.5 (2.8 to 6.7)           | -3.9 (-7.2 to -1.4)                            | -43.2 (-65.9 to -18.7)              |
| Yemen                                         | 88.2 (81.4 to 96.0)        | 46.2 (39.9 to 53.9)        | 45.9 (39.5 to 54.1)        | 27.9 (20.5 to 35.1)        | -3.4 (-5.1 to -2.1)                            | -39.5 (-53.2 to -27.4)              |
| <b>South Asia</b>                             |                            |                            |                            |                            |                                                |                                     |
| <b>South Asia</b>                             |                            |                            |                            |                            |                                                |                                     |
| Bangladesh                                    | 85.8 (80.2 to 91.5)        | 37.8 (33.2 to 43.2)        | 33.1 (28.4 to 38.5)        | 18.6 (14.8 to 24.1)        | -4.7 (-5.9 to -3.2)                            | -50.6 (-58.6 to -38.0)              |
| Bhutan                                        | 83.4 (73.5 to 94.0)        | 33.4 (27.5 to 40.4)        | 29.3 (24.2 to 36.0)        | 16.4 (11.8 to 21.1)        | -4.8 (-6.6 to -3.5)                            | -51.1 (-62.9 to -41.1)              |
| India                                         | 83.1 (76.7 to 90.1)        | 48.1 (42.1 to 54.8)        | 42.4 (36.5 to 50.0)        | 23.2 (18.6 to 39.6)        | -4.9 (-6.0 to -3.9)                            | -51.8 (-59.2 to -44.3)              |
| Nepal                                         | 79.3 (73.9 to 85.0)        | 36.7 (32.1 to 41.4)        | 31.4 (27.1 to 36.6)        | 16.7 (13.1 to 20.7)        | -5.3 (-6.6 to -4.1)                            | -54.4 (-62.7 to -45.6)              |
| Pakistan                                      | 90.5 (84.3 to 97.2)        | 64.5 (55.4 to 75.5)        | 58.2 (49.5 to 68.6)        | 34.1 (24.8 to 43.2)        | -4.3 (-6.2 to -2.9)                            | -47.1 (-60.4 to -35.6)              |
| <b>Southeast Asia, East Asia, and Oceania</b> |                            |                            |                            |                            |                                                |                                     |
| <b>East Asia</b>                              |                            |                            |                            |                            |                                                |                                     |
| China                                         | 33.9 (30.6 to 37.3)        | 13.6 (11.8 to 15.8)        | 12.0 (10.3 to 14.3)        | 6.7 (4.8 to 9.2)           | -4.8 (-6.9 to -2.9)                            | -50.9 (-64.3 to -35.4)              |
| North Korea                                   | 119.9 (112.3 to 128.3)     | 25.5 (20.9 to 31.3)        | 22.7 (18.7 to 28.1)        | 17.7 (10.0 to 50.3)        | -2.9 (-6.2 to 4.8)                             | -30.5 (-60.7 to 106.9)              |
| Taiwan (Province of China)                    | 7.9 (7.6 to 8.1)           | 5.0 (4.8 to 5.2)           | 4.7 (4.2 to 5.2)           | 3.8 (2.9 to 5.2)           | -1.9 (-3.7 to 0.3)                             | -24.0 (-42.2 to 5.4)                |
| <b>Oceania</b>                                |                            |                            |                            |                            |                                                |                                     |
| American Samoa                                | 14.6 (12.9 to 16.3)        | 10.4 (8.9 to 12.1)         | 10.1 (8.6 to 12.0)         | 6.5 (4.5 to 8.3)           | -3.2 (-5.4 to -1.6)                            | -37.5 (-55.5 to -21.5)              |
| Federated States of Micronesia                | 34.4 (29.5 to 40.0)        | 18.8 (15.6 to 22.7)        | 17.5 (14.4 to 21.2)        | 12.6 (9.9 to 15.9)         | -2.7 (-3.7 to -1.7)                            | -32.7 (-42.9 to -22.1)              |
| Fiji                                          | 27.3 (23.5 to 31.5)        | 26.3 (22.0 to 31.3)        | 25.7 (21.5 to 30.8)        | 25.6 (16.3 to 36.7)        | -0.3 (-2.9 to 2.1)                             | -2.2 (-35.3 to 38.0)                |
| Guam                                          | 11.1 (10.1 to 12.2)        | 13.5 (12.0 to 15.1)        | 13.5 (11.7 to 15.5)        | 8.4 (5.0 to 11.6)          | -3.3 (-6.4 to -1.2)                            | -37.6 (-61.9 to -16.5)              |
| Kiribati                                      | 66.5 (58.4 to 75.7)        | 46.2 (38.8 to 51.9)        | 45.0 (35.8 to 51.7)        | 31.7 (24.8 to 39.4)        | -2.5 (-3.5 to -1.6)                            | -31.5 (-40.7 to -21.3)              |
| Marshall Islands                              | 37.0 (33.0 to 41.3)        | 23.7 (19.5 to 28.3)        | 22.2 (18.4 to 26.5)        | 16.1 (12.5 to 20.3)        | -2.6 (-3.9 to -1.4)                            | -32.0 (-44.0 to -18.8)              |
| Northern Mariana Islands                      | 7.3 (6.3 to 8.4)           | 8.8 (7.4 to 10.2)          | 8.4 (7.2 to 9.9)           | 6.2 (4.1 to 9.3)           | -2.4 (-4.8 to 0.1)                             | -29.0 (-51.5 to 1.3)                |
| Papua New Guinea                              | 67.0 (58.0 to 76.7)        | 55.7 (46.6 to 66.4)        | 52.6 (43.7 to 63.2)        | 36.0 (29.2 to 44.0)        | -2.9 (-3.6 to -2.1)                            | -35.4 (-41.8 to -26.5)              |
| Samoa                                         | 16.9 (13.9 to 20.5)        | 14.8 (12.2 to 17.8)        | 14.1 (11.6 to 17.1)        | 10.8 (8.2 to 14.2)         | -2.2 (-3.2 to -0.5)                            | -27.2 (-38.0 to -7.3)               |
| Solomon Islands                               | 38.1 (31.6 to 45.4)        | 27.9 (23.0 to 33.2)        | 26.0 (21.5 to 31.5)        | 19.1 (14.7 to 24.3)        | -2.5 (-3.6 to -1.3)                            | -31.4 (-42.0 to -17.6)              |
| Tonga                                         | 21.1 (17.6 to 25.1)        | 17.5 (14.4 to 21.1)        | 16.6 (13.7 to 20.1)        | 13.0 (10.3 to 16.3)        | -2.0 (-2.9 to -1.0)                            | -25.7 (-35.2 to -13.9)              |
| Vanuatu                                       | 33.8 (28.5 to 39.4)        | 30.5 (25.1 to 37.4)        | 29.4 (24.2 to 36.1)        | 21.3 (16.2 to 28.9)        | -2.4 (-3.8 to -0.8)                            | -30.2 (-43.5 to -10.9)              |
| <b>Southeast Asia</b>                         |                            |                            |                            |                            |                                                |                                     |
| Cambodia                                      | 93.7 (87.3 to 100.7)       | 35.1 (30.1 to 40.4)        | 31.5 (26.9 to 36.8)        | 21.1 (13.9 to 58.3)        | -3.8 (-5.9 to 3.2)                             | -40.0 (-58.9 to 62.1)               |
| Indonesia                                     | 53.9 (50.2 to 57.8)        | 28.5 (24.4 to 33.4)        | 26.0 (21.7 to 31.1)        | 15.8 (12.5 to 19.5)        | -4.0 (-5.0 to -2.9)                            | -44.8 (-53.1 to -35.5)              |
| Laos                                          | 136.6 (124.6 to 148.6)     | 64.0 (54.4 to 74.5)        | 64.0 (54.4 to 74.5)        | 34.6 (28.4 to 41.5)        | -4.1 (-5.0 to -3.2)                            | -45.9 (-52.4 to -39.1)              |
| Malaysia                                      | 9.3 (9.1 to 9.5)           | 8.4 (8.2 to 8.7)           | 7.2 (6.3 to 8.7)           | 5.0 (4.0 to 6.2)           | -3.5 (-5.0 to -2.0)                            | -40.3 (-52.5 to -25.6)              |
| Maldives                                      | 29.3 (26.2 to 32.8)        | 8.9 (7.5 to 10.6)          | 7.7 (6.5 to 9.3)           | 4.5 (2.7 to 7.3)           | -4.7 (-7.8 to -1.6)                            | -48.7 (-69.1 to -20.9)              |
| Mauritius                                     | 16.8 (15.7 to 18.1)        | 14.9 (13.7 to 16.1)        | 13.8 (12.1 to 15.8)        | 11.0 (9.0 to 13.2)         | -2.0 (-3.3 to -0.8)                            | -25.9 (-39.3 to -11.1)              |
| Myanmar                                       | 110.5 (99.9 to 122.7)      | 49.1 (43.0 to 56.0)        | 44.3 (38.1 to 51.4)        | 26.2 (19.9 to 33.6)        | -4.2 (-5.7 to -2.8)                            | -46.5 (-57.7 to -34.5)              |
| Philippines                                   | 38.6 (35.4 to 42.1)        | 29.7 (25.2 to 34.6)        | 26.6 (22.5 to 31.5)        | 18.8 (15.7 to 22.3)        | -3.0 (-3.7 to -2.3)                            | -36.6 (-42.9 to -29.2)              |
| Sri Lanka                                     | 16.3 (15.9 to 16.7)        | 9.7 (8.4 to 11.2)          | 8.5 (7.1 to 10.2)          | 6.8 (4.3 to 8.9)           | -2.5 (-5.3 to 0.1)                             | -30.2 (-54.9 to 1.7)                |
| Seychelles                                    | 13.7 (12.2 to 15.4)        | 13.2 (11.6 to 15.0)        | 12.5 (10.8 to 14.5)        | 8.9 (6.9 to 11.2)          | -2.7 (-4.1 to -1.3)                            | -32.9 (-46.0 to -18.2)              |
| Thailand                                      | 17.6 (15.2 to 20.3)        | 8.9 (8.7 to 9.1)           | 8.7 (8.2 to 9.2)           | 4.7 (3.6 to 6.0)           | -4.3 (-6.0 to -2.7)                            | -46.8 (-59.1 to -32.9)              |

|                                                                                                                              | Estimate in 2000 (95% UIs) | Estimate in 2015 (95% UIs) | Estimate in 2017 (95% UIs) | Estimate in 2020 (95% UIs) | Annualised rate of change, 2015-2020 (95% UIs) | Percent change, 2015-2020 (95% UIs) |
|------------------------------------------------------------------------------------------------------------------------------|----------------------------|----------------------------|----------------------------|----------------------------|------------------------------------------------|-------------------------------------|
| Timor-Leste                                                                                                                  | 80.7 (74.2 to 87.7)        | 37.5 (32.4 to 43.4)        | 35.7 (30.5 to 41.5)        | 22.5 (17.3 to 30.3)        | -3.4 (-4.9 to -1.6)                            | -39.8 (-52.2 to -21.2)              |
| Vietnam                                                                                                                      | 27.1 (24.4 to 30.1)        | 14.4 (12.3 to 17.1)        | 13.1 (11.0 to 15.9)        | 9.3 (6.8 to 15.4)          | -3.0 (-4.6 to 0.6)                             | -35.3 (-49.7 to 9.8)                |
| <b>Sub-Saharan Africa</b>                                                                                                    |                            |                            |                            |                            |                                                |                                     |
| <b>Central Sub-Saharan Africa</b>                                                                                            |                            |                            |                            |                            |                                                |                                     |
| Angola                                                                                                                       | 181.6 (168.4 to 195.1)     | 72.4 (63.2 to 82.3)        | 65.2 (56.3 to 75.2)        | 33.8 (25.9 to 42.0)        | -5.1 (-6.7 to -3.9)                            | -53.3 (-63.2 to -44.6)              |
| Central African Republic                                                                                                     | 180.5 (162.7 to 199.5)     | 131.3 (112.4 to 154.7)     | 123.8 (104.9 to 148.2)     | 87.2 (64.6 to 113.5)       | -2.8 (-4.3 to -1.3)                            | -33.6 (-47.5 to -18.2)              |
| Congo                                                                                                                        | 108.5 (98.5 to 118.7)      | 57.5 (48.9 to 67.9)        | 55.2 (46.5 to 66.5)        | 36.2 (27.9 to 48.7)        | -3.1 (-4.4 to -1.5)                            | -37.0 (-48.5 to -19.8)              |
| Democratic Republic of the Congo                                                                                             | 151.5 (140.2 to 163.6)     | 89.5 (77.5 to 103.2)       | 81.9 (70.1 to 95.2)        | 50.1 (41.8 to 59.2)        | -3.9 (-4.7 to -3.1)                            | -44.0 (-50.3 to -37.1)              |
| Equatorial Guinea                                                                                                            | 137.4 (119.4 to 156.4)     | 57.6 (47.6 to 69.9)        | 54.1 (44.8 to 66.2)        | 32.6 (24.7 to 42.5)        | -3.8 (-5.3 to -2.3)                            | -43.4 (-54.6 to -29.1)              |
| Gabon                                                                                                                        | 69.8 (63.2 to 77.3)        | 38.8 (32.5 to 45.4)        | 35.2 (29.6 to 41.7)        | 25.6 (19.7 to 32.0)        | -2.8 (-4.0 to -1.7)                            | -34.0 (-45.1 to -22.3)              |
| <b>Eastern Sub-Saharan Africa</b>                                                                                            |                            |                            |                            |                            |                                                |                                     |
| Burundi                                                                                                                      | 168.9 (157.4 to 181.7)     | 83.3 (73.9 to 94.5)        | 80.7 (70.2 to 93.9)        | 54.5 (44.4 to 67.4)        | -2.9 (-3.9 to -1.8)                            | -34.6 (-44.6 to -23.7)              |
| Comoros                                                                                                                      | 97.7 (88.2 to 107.8)       | 53.1 (44.8 to 63.0)        | 48.0 (40.4 to 57.9)        | 29.9 (24.0 to 37.6)        | -3.9 (-4.9 to -2.7)                            | -43.7 (-52.2 to -33.6)              |
| Djibouti                                                                                                                     | 101.5 (90.4 to 115.5)      | 51.3 (42.3 to 62.1)        | 45.1 (37.4 to 55.5)        | 27.0 (20.8 to 34.5)        | -4.3 (-5.6 to -3.2)                            | -47.4 (-56.6 to -38.3)              |
| Eritrea                                                                                                                      | 91.6 (81.4 to 103.0)       | 51.6 (42.4 to 62.2)        | 46.5 (38.5 to 57.1)        | 32.8 (24.7 to 44.1)        | -3.1 (-4.5 to -1.3)                            | -36.4 (-48.7 to -17.4)              |
| Ethiopia                                                                                                                     | 145.8 (135.8 to 155.8)     | 64.0 (56.0 to 73.2)        | 56.1 (48.3 to 66.1)        | 30.4 (23.4 to 38.9)        | -5.0 (-6.4 to -3.6)                            | -52.5 (-62.0 to -41.7)              |
| Kenya                                                                                                                        | 87.6 (81.4 to 94.1)        | 48.0 (41.8 to 55.1)        | 44.0 (37.7 to 51.5)        | 29.2 (23.4 to 36.7)        | -3.3 (-4.5 to -2.2)                            | -39.2 (-48.8 to -27.6)              |
| Madagascar                                                                                                                   | 109.5 (100.2 to 119.5)     | 78.2 (66.4 to 93.1)        | 73.9 (62.2 to 89.0)        | 50.5 (41.8 to 61.1)        | -2.9 (-3.7 to -2.3)                            | -35.5 (-42.7 to -28.8)              |
| Malawi                                                                                                                       | 156.9 (148.0 to 166.4)     | 70.7 (62.3 to 80.6)        | 65.2 (56.4 to 76.4)        | 39.4 (32.5 to 47.4)        | -3.9 (-4.9 to -3.0)                            | -44.4 (-51.8 to -36.4)              |
| Mozambique                                                                                                                   | 159.2 (148.1 to 170.4)     | 81.7 (69.9 to 94.3)        | 75.8 (62.6 to 86.4)        | 44.7 (37.1 to 53.2)        | -4.0 (-4.7 to -3.4)                            | -45.2 (-50.6 to -40.2)              |
| Rwanda                                                                                                                       | 157.9 (147.8 to 168.1)     | 51.5 (44.5 to 60.0)        | 47.0 (40.3 to 55.7)        | 31.7 (22.2 to 38.6)        | -3.8 (-5.2 to -2.3)                            | -38.3 (-44.3 to -29.0)              |
| Somalia                                                                                                                      | 155.2 (139.9 to 171.3)     | 102.5 (90.3 to 128.0)      | 102.5 (86.3 to 123.6)      | 72.5 (58.8 to 88.8)        | -2.6 (-3.5 to -1.9)                            | -32.5 (-41.0 to -25.4)              |
| South Sudan                                                                                                                  | 144.3 (131.7 to 157.6)     | 107.6 (91.9 to 125.5)      | 104.7 (89.0 to 122.4)      | 75.5 (60.7 to 93.5)        | -2.4 (-3.4 to -1.4)                            | -29.8 (-40.0 to -18.7)              |
| Tanzania                                                                                                                     | 123.6 (115.5 to 131.0)     | 66.6 (57.9 to 76.3)        | 61.5 (52.9 to 72.5)        | 37.8 (32.0 to 45.7)        | -3.8 (-4.5 to -3.1)                            | -43.2 (-48.9 to -36.9)              |
| Uganda                                                                                                                       | 137.0 (129.0 to 145.6)     | 66.2 (58.4 to 74.3)        | 60.0 (52.4 to 68.5)        | 35.5 (29.5 to 42.0)        | -4.2 (-5.1 to -3.3)                            | -46.3 (-53.4 to -38.9)              |
| Zambia                                                                                                                       | 142.4 (131.4 to 153.5)     | 64.8 (55.7 to 75.8)        | 62.5 (53.1 to 74.5)        | 39.5 (32.6 to 48.3)        | -3.3 (-4.2 to -2.5)                            | -39.1 (-46.4 to -31.2)              |
| <b>Southern Sub-Saharan Africa</b>                                                                                           |                            |                            |                            |                            |                                                |                                     |
| Botswana                                                                                                                     | 62.4 (54.9 to 70.5)        | 24.3 (20.2 to 29.4)        | 22.7 (18.8 to 27.9)        | 15.1 (7.6 to 31.2)         | -3.6 (-7.6 to 1.4)                             | -38.0 (-67.9 to 24.1)               |
| Lesotho                                                                                                                      | 96.9 (89.5 to 105.3)       | 75.2 (64.7 to 86.9)        | 69.0 (59.0 to 80.7)        | 51.8 (35.8 to 72.5)        | -2.6 (-4.7 to -0.5)                            | -31.2 (-50.3 to -7.7)               |
| Namibia                                                                                                                      | 64.7 (59.1 to 70.4)        | 38.2 (32.5 to 44.9)        | 39.2 (33.1 to 47.0)        | 28.2 (20.4 to 40.4)        | -2.1 (-3.9 to 0.0)                             | -26.5 (-44.6 to 0.0)                |
| South Africa                                                                                                                 | 77.0 (71.1 to 83.2)        | 42.2 (36.7 to 48.4)        | 33.6 (28.6 to 39.2)        | 23.1 (18.9 to 27.9)        | 4.0 (-4.8 to -3.2)                             | -48.5 (-51.3 to -38.5)              |
| Swaziland                                                                                                                    | 91.3 (84.5 to 99.1)        | 49.3 (42.5 to 56.3)        | 45.1 (38.6 to 52.5)        | 33.6 (21.4 to 49.9)        | -2.7 (-5.3 to -0.0)                            | -31.9 (-45.0 to -0.1)               |
| Zimbabwe                                                                                                                     | 75.9 (70.8 to 81.1)        | 59.8 (52.8 to 67.3)        | 56.1 (48.7 to 64.4)        | 50.5 (32.6 to 80.3)        | -1.3 (-3.9 to 1.8)                             | -15.6 (-44.2 to 31.5)               |
| <b>Western Sub-Saharan Africa</b>                                                                                            |                            |                            |                            |                            |                                                |                                     |
| Benin                                                                                                                        | 140.2 (130.2 to 150.6)     | 91.3 (80.1 to 104.2)       | 83.0 (71.6 to 97.5)        | 48.4 (40.6 to 58.3)        | -4.2 (-5.1 to -3.5)                            | -47.0 (-53.2 to -40.7)              |
| Burkina Faso                                                                                                                 | 179.5 (166.6 to 193.4)     | 113.6 (97.4 to 132.3)      | 105.9 (89.9 to 126.5)      | 65.1 (51.8 to 82.3)        | -3.7 (-4.8 to -2.7)                            | -42.7 (-51.6 to -33.3)              |
| Cameroon                                                                                                                     | 134.2 (125.0 to 144.8)     | 81.5 (70.7 to 93.8)        | 73.5 (62.9 to 85.9)        | 50.0 (38.9 to 64.6)        | -3.3 (-4.8 to -1.9)                            | -38.6 (-51.3 to -24.6)              |
| Cape Verde                                                                                                                   | 50.6 (44.0 to 57.8)        | 22.4 (19.8 to 25.2)        | 20.3 (17.5 to 23.8)        | 12.5 (9.2 to 16.1)         | -3.9 (-5.8 to -2.6)                            | -44.1 (-58.0 to -32.1)              |
| Chad                                                                                                                         | 183.6 (170.0 to 197.7)     | 123.7 (107.8 to 140.2)     | 117.0 (101.1 to 134.8)     | 78.6 (63.4 to 95.2)        | -3.0 (-4.2 to -2.2)                            | -36.4 (-46.4 to -27.7)              |
| Cote d'Ivoire                                                                                                                | 137.7 (126.8 to 148.5)     | 90.7 (77.7 to 105.1)       | 83.1 (70.5 to 97.9)        | 51.0 (40.5 to 63.1)        | -3.9 (-4.9 to -2.7)                            | -43.7 (-52.0 to -33.6)              |
| The Gambia                                                                                                                   | 86.9 (78.6 to 95.9)        | 51.3 (43.4 to 60.3)        | 47.8 (40.3 to 57.5)        | 32.2 (26.1 to 39.6)        | -3.1 (-4.0 to -2.2)                            | -37.2 (-44.4 to -28.0)              |
| Ghana                                                                                                                        | 100.9 (94.8 to 106.8)      | 61.7 (54.0 to 70.9)        | 55.6 (47.9 to 65.5)        | 34.0 (27.7 to 41.3)        | -4.0 (-5.0 to -3.0)                            | -45.0 (-52.8 to -36.4)              |
| Guinea                                                                                                                       | 171.6 (159.3 to 185.2)     | 105.3 (90.7 to 122.1)      | 96.7 (82.4 to 115.0)       | 59.9 (49.8 to 73.7)        | -3.8 (-4.6 to -2.9)                            | -43.1 (-49.6 to -35.5)              |
| Guinea-Bissau                                                                                                                | 161.1 (147.4 to 175.9)     | 80.3 (69.1 to 93.4)        | 73.2 (62.4 to 85.4)        | 43.8 (34.4 to 53.3)        | -4.1 (-5.3 to -3.2)                            | -45.4 (-54.6 to -37.8)              |
| Liberia                                                                                                                      | 169.9 (158.5 to 182.2)     | 82.6 (71.4 to 96.8)        | 74.8 (63.8 to 88.9)        | 44.8 (36.4 to 56.0)        | -4.1 (-5.1 to -3.0)                            | -45.8 (-53.5 to -36.5)              |
| Mali                                                                                                                         | 193.0 (181.1 to 205.5)     | 126.7 (113.0 to 143.0)     | 119.0 (104.0 to 137.9)     | 73.8 (61.9 to 89.2)        | -3.6 (-4.5 to -2.8)                            | -41.7 (-49.1 to -34.1)              |
| Mauritania                                                                                                                   | 91.4 (84.7 to 98.9)        | 49.4 (43.2 to 57.1)        | 45.0 (38.7 to 53.1)        | 28.5 (23.2 to 34.9)        | -3.7 (-4.7 to -2.8)                            | -42.3 (-50.4 to -33.9)              |
| Niger                                                                                                                        | 225.7 (208.3 to 244.4)     | 117.1 (100.3 to 137.6)     | 108.0 (91.8 to 128.9)      | 66.7 (55.1 to 80.3)        | -3.8 (-4.5 to -3.1)                            | -43.0 (-49.2 to -37.1)              |
| Nigeria                                                                                                                      | 180.4 (171.2 to 189.9)     | 110.7 (99.2 to 123.8)      | 103.2 (90.8 to 117.0)      | 57.2 (42.2 to 71.2)        | -4.5 (-6.4 to -3.2)                            | -48.3 (-61.5 to -38.1)              |
| Sao Tome and Principe                                                                                                        | 74.2 (67.6 to 80.9)        | 32.8 (28.0 to 38.3)        | 29.3 (24.8 to 34.7)        | 18.3 (14.8 to 22.3)        | -3.9 (-5.0 to -2.9)                            | -44.1 (-52.8 to -35.1)              |
| Senegal                                                                                                                      | 117.2 (110.1 to 124.8)     | 52.0 (46.4 to 58.6)        | 48.0 (41.9 to 55.7)        | 28.9 (23.7 to 35.1)        | 4.0 (-5.1 to -2.9)                             | -44.5 (-53.3 to -35.3)              |
| Sierra Leone                                                                                                                 | 214.0 (200.8 to 228.9)     | 120.4 (105.8 to 136.1)     | 110.4 (95.5 to 127.6)      | 70.2 (58.3 to 84.1)        | -3.6 (-4.4 to -2.7)                            | -41.7 (-48.5 to -33.0)              |
| Togo                                                                                                                         | 122.8 (112.3 to 133.8)     | 74.1 (64.1 to 85.7)        | 66.8 (56.8 to 79.7)        | 40.8 (33.8 to 49.8)        | -4.0 (-4.8 to -3.2)                            | -44.9 (-51.7 to -38.5)              |
| <b>Indicator 3.2.2. Neonatal mortality rate (probability of dying during the first 28 days of life per 1,000 livebirths)</b> |                            |                            |                            |                            |                                                |                                     |
| <b>Central Europe, Eastern Europe, and Central Asia</b>                                                                      |                            |                            |                            |                            |                                                |                                     |
| <b>Central Asia</b>                                                                                                          |                            |                            |                            |                            |                                                |                                     |
| Armenia                                                                                                                      | 14.4 (12.6 to 16.4)        | 5.7 (5.3 to 6.2)           | 5.5 (4.9 to 6.1)           | 5.6 (2.6 to 4.8)           | -3.2 (-5.2 to -1.1)                            | -37.5 (-53.9 to -15.6)              |
| Azerbaijan                                                                                                                   | 30.7 (27.0 to 34.7)        | 21.3 (18.2 to 24.8)        | 20.2 (17.2 to 23.7)        | 15.0 (12.1 to 18.4)        | -2.4 (-3.4 to -1.3)                            | -29.7 (-39.6 to -18.2)              |
| Georgia                                                                                                                      | 20.2 (17.8 to 22.8)        | 7.1 (5.9 to 8.3)           | 6.5 (5.4 to 7.7)           | 4.3 (3.2 to 5.6)           | -3.4 (-4.7 to -1.9)                            | -39.6 (-50.9 to -24.7)              |
| Kazakhstan                                                                                                                   | 17.4 (15.4 to 19.8)        | 7.3 (6.0 to 8.8)           | 6.9 (5.5 to 8.5)           | 4.8 (3.1 to 6.7)           | -2.8 (-5.5 to -0.7)                            | -33.7 (-46.2 to -9.7)               |
| Kyrgyzstan                                                                                                                   | 19.9 (16.9 to 23.1)        | 14.2 (13.3 to 15.1)        | 13.0 (12.0 to 14.1)        | 9.8 (8.8 to 10.8)          | -2.5 (-3.2 to -1.8)                            | -31.2 (-37.7 to -24.0)              |
| Mongolia                                                                                                                     | 22.9 (20.5 to 25.3)        | 15.1 (13.2 to 17.5)        | 14.2 (12.3 to 16.4)        | 9.6 (8.1 to 11.7)          | -3.0 (-4.0 to -2.1)                            | -36.3 (-44.8 to -26.9)              |
| Tajikistan                                                                                                                   | 25.5 (22.7 to 28.5)        | 21.8 (18.8 to 25.2)        | 21.0 (18.0 to 24.4)        | 14.4 (11.7 to 17.4)        | -2.8 (-3.9 to -1.7)                            | -33.9 (-44.0 to -22.9)              |
| Turkmenistan                                                                                                                 | 25.8 (22.7 to 29.4)        | 16.7 (14.5 to 19.1)        | 15.7 (13.4 to 18.1)        | 10.7 (8.3 to 13.2)         | -5.0 (-4.5 to -2.0)                            | -36.3 (-48.8 to -26.0)              |
| Uzbekistan                                                                                                                   | 19.8 (17.5 to 22.3)        | 13.5 (11.3 to 15.9)        | 12.4 (10.4 to 15.0)        | 8.9 (7.0 to 11.3)          | -2.8 (-3.9 to -1.6)                            | -34.1 (-43.9 to -21.4)              |
| <b>Central Europe</b>                                                                                                        |                            |                            |                            |                            |                                                |                                     |
| Albania                                                                                                                      | 13.8 (11.5 to 16.3)        | 7.4 (6.0 to 9.1)           | 6.8 (5.5 to 8.4)           | 5.1 (3.4 to 7.0)           | -2.5 (-4.9 to -0.8)                            | -30.3 (-51.7 to -11.6)              |
| Bosnia and Herzegovina                                                                                                       | 7.6 (7.0 to 8.2)           | 5.3 (4.9 to 5.8)           | 5.0 (4.4 to 5.8)           | 3.6 (2.8 to 4.7)           | -2.7 (-4.4 to -0.9)                            | -33.0 (-48.1 to -12.9)              |
| Bulgaria                                                                                                                     | 7.6 (6.9 to 8.3)           | 4.1 (3.9 to 4.4)           | 4.0 (3.6 to 4.5)           | 2.7 (2.0 to 3.5)           | -3.0 (-5.0 to -1.0)                            | -35.1 (-52.4 to -14.2)              |
| Croatia                                                                                                                      | 5.5 (5.1 to 5.9)           | 3.0 (2.7 to 3.4)           | 2.8 (2.4 to 3.1)           | 1.9 (1.5 to 2.5)           | -3.1 (-4.8 to -1.2)                            | -36.5 (-51.0 to -16.1)              |
| Czech Republic                                                                                                               | 2.6 (2.5 to 2.9)           | 1.5 (1.4 to 1.7)           | 1.4 (1.2 to 1.6)           | 1.0 (0.7 to 1.4)           | -3.1 (-5.6 to -0.5)                            | -35.7 (-47.0 to -6.9)               |
| Hungary                                                                                                                      | 6.1 (5.6 to 6.5)           | 3.0 (2.7 to 3.2)           | 2.8 (2.4 to 3.0)           | 1.7 (1.2 to 2.4)           | -2.7 (-4.2 to -1.5)                            | -42.0 (-48.2 to -20.3)              |
| Macedonia                                                                                                                    | 8.9 (8.2 to 9.7)           | 6.5 (5.8 to 7.3)           | 6.3 (5.3 to 7.3)           | 4.8 (3.3 to 7.1)           | -2.2 (-4.6 to 0.6)                             | -26.5 (-50.2 to 8.9)                |
| Montenegro                                                                                                                   | 8.7 (7.8 to 9.6)           | 2.6 (2.3 to 2.9)           | 2.5 (2.2 to 2.9)           | 1.7 (1.1 to 2.9)           | -2.9 (-5.8 to 0.7)                             | -33.5 (-57.9 to 11.4)               |
| Poland                                                                                                                       | 5.8 (5.5 to 6.2)           | 2.9 (2.7 to 3.0)           | 2.7 (2.4 to 3.0)           | 1.7 (1.2 to 2.3)           | -3.6 (-5.8 to -1.2)                            | -40.5 (-57.9 to -16.9)              |
| Romania                                                                                                                      | 9.2 (8.4 to 10.2)          | 4.5 (4.1 to 4.9)           | 4.2 (3.8 to 4.8)           | 2.7 (2.0 to 3.7)           | -3.4 (-5.6 to -1.2)                            | -39.0 (-57.0 to -16.8)              |
| Serbia                                                                                                                       | 8.8 (7.3 to 10.3)          | 3.3 (3.1 to 3.5)           | 3.1 (2.8 to 3.5)           | 2.3 (1.8 to 2.8)           | -2.5 (-4.1 to -0.9)                            | -30.6 (-45.7 to -12.2)              |
| Slovakia                                                                                                                     | 5.2 (4.8 to 5.5)           | 3.2 (2.9 to 3.6)           | 3.0 (2.5 to 3.5)           | 2.0 (1.6 to 2.5)           | -3.2 (-4.7 to -1.7)                            | -38.2 (-50.6 to -22.5)              |
| Slovenia                                                                                                                     | 3.2 (3.0 to 3.5)           | 1.5 (1.4 to 1.7)           | 1.4 (1.2 to 1.6)           | 1.0 (0.8 to 1.3)           | -2.9 (-4.6 to -1.2)                            | -35.0 (-50.0 to -16.5)              |
| <b>Eastern Europe</b>                                                                                                        |                            |                            |                            |                            |                                                |                                     |



|                                  | Estimate in 2000 (95% UIs) | Estimate in 2015 (95% UIs) | Estimate in 2017 (95% UIs) | Estimate in 2020 (95% UIs) | Annualised rate of change, 2015-2020 (95% UIs) | Percent change, 2015-2020 (95% UIs) |
|----------------------------------|----------------------------|----------------------------|----------------------------|----------------------------|------------------------------------------------|-------------------------------------|
| Belarus                          | 9.1 (8.0 to 10.2)          | 3.5 (3.2 to 4.4)           | 3.5 (3.2 to 4.2)           | 1.8 (1.2 to 2.7)           | -5.0 (-7.2 to -2.3)                            | -51.7 (-66.3 to -29.7)              |
| Botswana                         | 5.2 (4.7 to 5.7)           | 1.4 (1.3 to 1.6)           | 1.3 (1.2 to 1.4)           | 1.1 (0.5 to 2.1)           | -2.1 (-2.7 to 2.5)                             | -21.8 (-46.2 to -45.3)              |
| Latvia                           | 6.8 (6.3 to 7.3)           | 2.7 (2.4 to 3.0)           | 2.5 (2.1 to 2.9)           | 1.6 (0.9 to 2.8)           | -3.7 (-7.2 to 0.2)                             | -40.6 (-66.1 to 2.4)                |
| Lithuania                        | 4.7 (4.5 to 5.0)           | 2.4 (2.2 to 2.6)           | 2.2 (2.0 to 2.5)           | 1.6 (0.9 to 2.5)           | -3.0 (-6.1 to -0.3)                            | -35.2 (-60.0 to -4.8)               |
| Moldova                          | 18.7 (16.7 to 20.9)        | 11.7 (10.1 to 13.4)        | 10.6 (9.0 to 12.3)         | 8.0 (5.0 to 11.6)          | -2.7 (-5.4 to -0.0)                            | -31.4 (-55.2 to -0.4)               |
| Russia                           | 10.6 (10.2 to 11.0)        | 4.4 (4.3 to 4.6)           | 4.1 (4.0 to 4.2)           | 2.5 (1.3 to 3.5)           | -3.9 (-6.3 to -1.4)                            | -43.5 (-61.0 to -18.9)              |
| Ukraine                          | 8.4 (7.8 to 8.9)           | 5.0 (4.6 to 5.4)           | 4.7 (4.2 to 5.2)           | 3.6 (2.4 to 5.3)           | -2.4 (-5.0 to 0.5)                             | -29.0 (-53.1 to 7.2)                |
| High-income                      |                            |                            |                            |                            |                                                |                                     |
| Australasia                      |                            |                            |                            |                            |                                                |                                     |
| Australia                        | 3.5 (3.3 to 3.8)           | 2.4 (2.2 to 2.5)           | 2.2 (1.9 to 2.6)           | 1.8 (1.5 to 2.3)           | -1.7 (-3.1 to -0.2)                            | -22.5 (-37.3 to -2.9)               |
| New Zealand                      | 3.5 (3.3 to 3.8)           | 2.8 (2.6 to 3.0)           | 2.4 (2.1 to 2.8)           | 1.9 (1.3 to 2.7)           | -2.6 (-5.2 to -0.2)                            | -30.7 (-54.3 to -2.6)               |
| High-income Asia Pacific         |                            |                            |                            |                            |                                                |                                     |
| Bhunei                           | 5.0 (4.5 to 5.4)           | 4.5 (4.1 to 5.0)           | 4.3 (3.8 to 4.9)           | 4.3 (3.0 to 5.8)           | -0.4 (-2.6 to 1.5)                             | -5.3 (-32.1 to 26.0)                |
| Japan                            | 1.8 (1.7 to 1.9)           | 1.1 (1.1 to 1.2)           | 1.1 (0.9 to 1.2)           | 0.8 (0.6 to 1.0)           | -2.8 (-4.5 to -0.9)                            | -33.6 (-49.3 to -12.4)              |
| South Korea                      | 2.7 (2.4 to 3.0)           | 1.5 (1.3 to 1.7)           | 1.5 (1.2 to 1.7)           | 1.2 (0.8 to 2.4)           | -1.7 (-4.3 to 3.3)                             | -19.7 (-47.2 to 63.7)               |
| Singapore                        | 1.6 (1.5 to 1.7)           | 0.9 (0.8 to 1.0)           | 0.9 (0.8 to 1.0)           | 0.7 (0.5 to 0.8)           | -2.2 (-4.0 to -0.7)                            | -27.8 (-45.3 to -10.1)              |
| High-income North America        |                            |                            |                            |                            |                                                |                                     |
| Canada                           | 3.5 (3.3 to 3.7)           | 3.1 (3.0 to 3.3)           | 3.1 (2.8 to 3.4)           | 2.7 (2.2 to 3.3)           | -1.1 (-2.6 to 0.4)                             | -14.1 (-31.8 to 6.4)                |
| Greenland                        | 9.3 (8.2 to 10.5)          | 7.5 (6.6 to 8.5)           | 6.9 (6.0 to 7.9)           | 5.2 (4.0 to 6.7)           | -2.5 (-4.0 to -1.0)                            | -31.0 (-45.3 to -13.8)              |
| United States                    | 4.6 (4.5 to 4.8)           | 4.0 (3.9 to 4.0)           | 3.9 (3.5 to 4.2)           | 3.3 (2.7 to 4.0)           | -1.2 (-2.5 to 0.1)                             | -16.1 (-31.2 to 1.0)                |
| Southern Latin America           |                            |                            |                            |                            |                                                |                                     |
| Argentina                        | 10.6 (10.2 to 11.0)        | 6.5 (6.2 to 6.8)           | 6.3 (5.5 to 7.3)           | 4.8 (3.9 to 5.9)           | -2.1 (-3.4 to -0.6)                            | -26.5 (-40.1 to -8.6)               |
| Chile                            | 5.8 (5.4 to 6.1)           | 5.1 (4.8 to 5.3)           | 4.6 (3.9 to 5.4)           | 3.7 (3.0 to 4.6)           | -2.1 (-3.5 to -0.6)                            | -26.4 (-41.2 to -8.3)               |
| Uruguay                          | 8.2 (7.6 to 8.8)           | 5.0 (4.5 to 5.4)           | 5.0 (4.1 to 6.1)           | 3.8 (2.7 to 5.3)           | -1.8 (-4.1 to 0.5)                             | -22.6 (-45.8 to 8.2)                |
| Western Europe                   |                            |                            |                            |                            |                                                |                                     |
| Andorra                          | 1.4 (1.2 to 1.7)           | 0.8 (0.7 to 0.9)           | 0.8 (0.7 to 0.9)           | 0.6 (0.4 to 1.1)           | -1.8 (-5.0 to 2.0)                             | -21.9 (-52.6 to 34.7)               |
| Austria                          | 3.1 (2.8 to 3.5)           | 2.2 (1.9 to 2.4)           | 2.1 (1.8 to 2.3)           | 1.5 (1.2 to 1.9)           | -2.5 (-4.2 to -0.6)                            | -30.5 (-47.0 to -9.2)               |
| Belgium                          | 3.1 (2.6 to 3.5)           | 2.1 (1.9 to 2.4)           | 2.0 (1.7 to 2.2)           | 1.5 (1.2 to 1.9)           | -2.3 (-3.8 to -0.8)                            | -28.8 (-43.5 to -11.0)              |
| Cyprus                           | 4.2 (3.9 to 4.6)           | 1.8 (1.6 to 2.0)           | 1.7 (1.5 to 1.9)           | 1.2 (0.8 to 1.7)           | -3.0 (-5.1 to -0.4)                            | -34.3 (-53.5 to -5.5)               |
| Denmark                          | 3.2 (2.9 to 3.6)           | 2.4 (2.2 to 2.6)           | 2.2 (1.9 to 2.5)           | 1.8 (1.4 to 2.2)           | -2.1 (-3.6 to -0.5)                            | -26.5 (-41.9 to -7.1)               |
| Finland                          | 2.5 (2.2 to 2.8)           | 1.2 (1.0 to 1.4)           | 1.2 (1.0 to 1.4)           | 1.0 (0.7 to 1.4)           | -1.4 (-3.8 to 0.6)                             | -18.4 (-43.6 to 10.1)               |
| France                           | 2.8 (2.4 to 3.2)           | 2.2 (2.0 to 2.4)           | 2.1 (1.9 to 2.3)           | 1.6 (1.3 to 2.0)           | -2.1 (-3.5 to -0.3)                            | -25.9 (-41.1 to -4.6)               |
| Germany                          | 2.8 (2.4 to 3.1)           | 2.3 (2.0 to 2.6)           | 2.0 (1.6 to 2.5)           | 1.5 (1.2 to 1.9)           | -2.9 (-4.2 to -1.5)                            | -34.7 (-46.9 to -19.7)              |
| Greece                           | 3.9 (3.5 to 4.2)           | 2.6 (2.3 to 2.9)           | 2.5 (2.2 to 2.9)           | 1.7 (1.2 to 2.3)           | -2.8 (-5.0 to -0.9)                            | -33.9 (-52.4 to -12.6)              |
| Iceland                          | 2.0 (1.7 to 2.3)           | 1.0 (0.9 to 1.1)           | 0.9 (0.5 to 0.9)           | 0.7 (0.5 to 0.9)           | -2.7 (-4.3 to -1.0)                            | -33.2 (-47.3 to -14.5)              |
| Ireland                          | 4.0 (3.6 to 4.4)           | 2.3 (2.1 to 2.6)           | 2.1 (1.8 to 2.4)           | 1.8 (1.4 to 2.4)           | -1.9 (-3.7 to 0.4)                             | -23.6 (-42.9 to 6.8)                |
| Israel                           | 3.5 (3.0 to 4.1)           | 2.1 (1.9 to 2.3)           | 1.9 (1.7 to 2.1)           | 1.3 (0.9 to 1.8)           | -3.4 (-5.6 to -0.9)                            | -39.0 (-56.9 to -12.9)              |
| Italy                            | 3.3 (3.0 to 3.7)           | 2.1 (1.9 to 2.2)           | 1.9 (1.7 to 2.1)           | 1.4 (1.1 to 1.8)           | -2.6 (-4.2 to -0.9)                            | -31.6 (-47.0 to -12.3)              |
| Luxembourg                       | 2.6 (2.3 to 2.9)           | 1.2 (1.0 to 1.5)           | 1.1 (0.9 to 1.4)           | 0.9 (0.6 to 1.4)           | -1.9 (-4.8 to 0.6)                             | -22.9 (-51.4 to 9.9)                |
| Malta                            | 5.1 (4.6 to 5.7)           | 4.4 (3.9 to 5.0)           | 4.2 (3.6 to 4.8)           | 2.9 (2.2 to 3.6)           | -3.0 (-4.4 to -1.5)                            | -35.7 (-48.7 to -20.6)              |
| Netherlands                      | 3.8 (3.4 to 4.2)           | 2.5 (2.2 to 2.7)           | 2.5 (2.2 to 2.8)           | 2.0 (1.7 to 2.5)           | -1.3 (-2.7 to 0.3)                             | -17.0 (-33.3 to 4.0)                |
| Norway                           | 2.6 (2.4 to 2.8)           | 1.5 (1.4 to 1.6)           | 1.4 (1.2 to 1.6)           | 1.1 (0.9 to 1.4)           | -1.9 (-3.3 to -0.5)                            | -24.4 (-39.4 to -7.0)               |
| Portugal                         | 3.6 (3.1 to 4.0)           | 2.0 (1.7 to 2.2)           | 1.8 (1.6 to 2.1)           | 1.2 (0.9 to 1.7)           | -3.4 (-5.5 to -0.9)                            | -38.9 (-56.1 to -13.3)              |
| Spain                            | 2.9 (2.5 to 3.3)           | 1.8 (1.6 to 2.0)           | 1.8 (1.6 to 2.0)           | 1.3 (1.0 to 1.6)           | -2.4 (-4.1 to -0.7)                            | -30.1 (-46.0 to -9.9)               |
| Sweden                           | 2.1 (1.9 to 2.4)           | 1.6 (1.4 to 1.7)           | 1.5 (1.3 to 1.7)           | 1.2 (0.9 to 1.4)           | -2.0 (-3.5 to -0.6)                            | -25.9 (-41.2 to -8.4)               |
| Switzerland                      | 3.5 (3.1 to 4.0)           | 3.0 (2.7 to 3.3)           | 2.6 (2.3 to 2.9)           | 2.1 (1.7 to 2.6)           | -2.4 (-3.8 to -0.9)                            | -29.3 (-43.4 to -12.5)              |
| United Kingdom                   | 3.7 (3.5 to 4.0)           | 2.6 (2.5 to 2.8)           | 2.6 (2.4 to 2.9)           | 2.0 (1.7 to 2.3)           | -1.9 (-3.0 to -0.9)                            | -24.8 (-35.9 to -12.5)              |
| Latin America and Caribbean      |                            |                            |                            |                            |                                                |                                     |
| Andean Latin America             |                            |                            |                            |                            |                                                |                                     |
| Bolivia                          | 25.8 (22.5 to 29.4)        | 15.3 (12.9 to 18.2)        | 14.1 (11.8 to 16.7)        | 9.4 (7.8 to 11.4)          | -3.2 (-4.1 to -2.3)                            | -38.3 (-45.8 to -28.7)              |
| Ecuador                          | 16.3 (13.9 to 18.9)        | 8.3 (6.3 to 10.6)          | 7.9 (5.9 to 10.6)          | 5.6 (3.9 to 7.4)           | -2.7 (-4.6 to -0.8)                            | -32.4 (-50.2 to -11.8)              |
| Peru                             | 15.5 (13.9 to 17.4)        | 7.6 (6.0 to 9.3)           | 6.9 (5.8 to 8.3)           | 4.6 (3.5 to 6.1)           | -3.4 (-5.3 to -1.4)                            | -39.0 (-54.7 to -19.5)              |
| Caribbean                        |                            |                            |                            |                            |                                                |                                     |
| Antigua and Barbuda              | 9.4 (8.0 to 11.1)          | 5.7 (4.8 to 6.7)           | 5.6 (4.8 to 6.7)           | 4.5 (3.2 to 6.2)           | -1.6 (-3.8 to 0.2)                             | -20.4 (-43.0 to 2.9)                |
| The Bahamas                      | 7.3 (6.3 to 8.5)           | 6.7 (5.7 to 7.9)           | 6.5 (5.4 to 7.9)           | 5.5 (4.1 to 7.5)           | -1.3 (-2.9 to 0.5)                             | -17.0 (-35.1 to 7.8)                |
| Barbados                         | 9.5 (8.2 to 11.1)          | 9.2 (7.7 to 10.9)          | 9.1 (7.6 to 10.8)          | 7.7 (5.9 to 9.7)           | -1.3 (-2.4 to -0.1)                            | -16.9 (-30.2 to -1.6)               |
| Belize                           | 13.3 (11.6 to 15.3)        | 10.6 (9.0 to 12.3)         | 10.6 (8.7 to 12.1)         | 7.8 (6.2 to 9.6)           | -2.1 (-3.2 to -1.0)                            | -26.5 (-38.2 to -13.6)              |
| Bermuda                          | 2.8 (2.3 to 3.4)           | 2.7 (2.2 to 3.3)           | 2.6 (2.1 to 3.2)           | 2.5 (0.8 to 8.0)           | -1.6 (-8.0 to 7.3)                             | -6.9 (-69.8 to 200.6)               |
| Cuba                             | 4.2 (3.8 to 4.7)           | 2.6 (2.3 to 2.8)           | 2.3 (2.0 to 2.7)           | 1.8 (1.4 to 2.2)           | -2.5 (-4.3 to -0.8)                            | -30.7 (-47.2 to -11.0)              |
| Dominica                         | 11.5 (9.9 to 13.2)         | 18.1 (15.4 to 21.1)        | 18.1 (15.2 to 21.4)        | 18.9 (9.7 to 28.9)         | 0.0 (-4.0 to 2.9)                              | 4.4 (-45.4 to 54.4)                 |
| Dominican Republic               | 23.3 (20.3 to 26.5)        | 20.4 (16.7 to 24.9)        | 19.3 (16.0 to 23.2)        | 13.9 (10.0 to 18.3)        | -2.6 (-4.6 to -0.7)                            | -31.5 (-49.7 to -10.6)              |
| Grenada                          | 10.2 (8.9 to 11.8)         | 10.0 (8.6 to 11.8)         | 9.5 (8.1 to 11.0)          | 8.3 (4.9 to 11.8)          | -1.4 (-4.5 to 1.0)                             | -16.9 (-48.9 to 16.5)               |
| Guyana                           | 23.3 (20.3 to 26.6)        | 17.0 (14.4 to 19.7)        | 16.0 (13.6 to 18.8)        | 10.6 (6.4 to 14.1)         | -3.3 (-6.3 to -1.5)                            | -37.6 (-61.2 to -20.3)              |
| Haiti                            | 31.9 (27.7 to 36.8)        | 26.1 (19.8 to 34.0)        | 24.4 (18.0 to 31.9)        | 16.2 (11.1 to 22.1)        | -5.2 (-8.8 to -1.9)                            | -38.0 (-51.3 to -24.9)              |
| Jamaica                          | 12.9 (11.0 to 15.1)        | 10.9 (8.9 to 13.1)         | 10.4 (8.4 to 12.6)         | 8.9 (7.0 to 11.3)          | -1.4 (-2.4 to -0.5)                            | -18.4 (-30.2 to -6.7)               |
| Puerto Rico                      | 7.4 (6.8 to 8.0)           | 5.0 (4.6 to 5.5)           | 5.4 (4.8 to 6.0)           | 4.1 (3.0 to 5.7)           | -1.4 (-3.4 to 0.9)                             | -17.6 (-40.1 to 13.9)               |
| Saint Lucia                      | 11.7 (10.2 to 13.5)        | 10.6 (9.0 to 12.5)         | 9.9 (8.3 to 11.7)          | 6.9 (4.5 to 9.6)           | -3.0 (-5.5 to -0.8)                            | -35.2 (-56.0 to -11.2)              |
| Saint Vincent and the Grenadines | 14.5 (12.6 to 16.6)        | 11.3 (9.6 to 13.2)         | 11.3 (4.9 to 12.5)         | 7.1 (4.9 to 9.4)           | -3.2 (-5.3 to -1.6)                            | -37.1 (-55.0 to -21.5)              |
| Suriname                         | 24.0 (21.1 to 27.1)        | 18.2 (15.5 to 21.4)        | 17.8 (15.0 to 21.0)        | 15.2 (11.6 to 19.0)        | -1.2 (-2.7 to -0.0)                            | -16.4 (-33.1 to -0.2)               |
| Trinidad and Tobago              | 15.4 (13.1 to 17.8)        | 10.5 (8.7 to 12.5)         | 10.4 (8.6 to 12.5)         | 8.5 (6.6 to 11.0)          | -1.4 (-2.5 to 0.1)                             | -18.4 (-31.6 to 0.8)                |
| Virgin Islands, U.S.             | 7.5 (6.7 to 8.5)           | 5.7 (4.8 to 6.7)           | 5.7 (4.8 to 6.7)           | 3.7 (2.8 to 4.8)           | -2.9 (-4.6 to -1.5)                            | -34.9 (-50.0 to -19.6)              |
| Central Latin America            |                            |                            |                            |                            |                                                |                                     |
| Colombia                         | 13.8 (12.5 to 15.2)        | 8.1 (6.8 to 8.7)           | 7.4 (6.3 to 8.7)           | 5.2 (4.1 to 6.5)           | -3.0 (-4.3 to -1.6)                            | -35.6 (-47.2 to -21.4)              |
| Costa Rica                       | 7.4 (6.8 to 7.9)           | 5.8 (5.2 to 6.5)           | 5.3 (4.5 to 6.3)           | 3.9 (3.0 to 4.9)           | -2.7 (-4.3 to -1.2)                            | -32.7 (-47.5 to -16.8)              |
| El Salvador                      | 12.1 (10.1 to 14.1)        | 6.3 (4.9 to 8.0)           | 5.6 (4.0 to 7.4)           | 3.5 (2.3 to 5.0)           | -4.1 (-6.0 to -2.2)                            | -45.3 (-59.5 to -28.2)              |
| Guatemala                        | 16.2 (14.2 to 18.5)        | 10.0 (8.5 to 11.7)         | 9.2 (7.8 to 10.8)          | 6.8 (5.5 to 8.2)           | -2.6 (-3.8 to -1.5)                            | -31.9 (-43.9 to -19.7)              |
| Honduras                         | 17.3 (15.1 to 19.6)        | 8.5 (7.0 to 10.0)          | 7.6 (6.3 to 9.1)           | 5.6 (4.5 to 6.8)           | -2.8 (-3.8 to -1.7)                            | -34.0 (-43.6 to -22.7)              |
| Mexico                           | 11.0 (9.7 to 12.4)         | 7.2 (6.0 to 8.2)           | 6.8 (5.7 to 8.0)           | 4.8 (3.9 to 6.0)           | -2.6 (-3.7 to -1.5)                            | -32.3 (-43.0 to -20.7)              |
| Nicaragua                        | 13.0 (11.5 to 14.6)        | 10.1 (8.4 to 11.9)         | 8.7 (7.1 to 10.7)          | 5.7 (4.3 to 7.4)           | -3.8 (-5.3 to -2.5)                            | -43.3 (-54.6 to -31.3)              |
| Panama                           | 10.4 (8.8 to 12.2)         | 8.0 (6.7 to 9.5)           | 7.7 (6.5 to 9.1)           | 5.8 (4.8 to 6.9)           | -2.2 (-3.1 to -1.3)                            | -28.0 (-37.4 to -17.4)              |

|                                               | Estimate in 2000 (95% UIs) | Estimate in 2015 (95% UIs) | Estimate in 2017 (95% UIs) | Estimate in 2020 (95% UIs) | Annualised rate of change, 2015-2020 (95% UIs) | Percent change, 2015-2020 (95% UIs) |
|-----------------------------------------------|----------------------------|----------------------------|----------------------------|----------------------------|------------------------------------------------|-------------------------------------|
| Venezuela                                     | 11.5 (10.5 to 12.4)        | 9.6 (8.5 to 10.9)          | 9.4 (8.0 to 11.1)          | 8.1 (6.4 to 10.2)          | -1.2 (-2.7 to 0.5)                             | -15.7 (-33.5 to 8.4)                |
| <b>Tropical Latin America</b>                 |                            |                            |                            |                            |                                                |                                     |
| Brazil                                        | 17.5 (15.9 to 19.1)        | 9.2 (7.9 to 10.6)          | 8.5 (7.2 to 9.9)           | 6.4 (5.2 to 7.6)           | -2.5 (-3.3 to -1.7)                            | -30.6 (-39.0 to -22.9)              |
| Paraguay                                      | 15.9 (14.5 to 17.5)        | 5.7 (4.9 to 6.7)           | 5.3 (4.5 to 6.2)           | 3.7 (2.9 to 4.7)           | -3.0 (-4.3 to -1.8)                            | -35.5 (-47.2 to -23.5)              |
| <b>North Africa and Middle East</b>           |                            |                            |                            |                            |                                                |                                     |
| <b>North Africa and Middle East</b>           |                            |                            |                            |                            |                                                |                                     |
| Afghanistan                                   | 41.9 (34.9 to 48.7)        | 24.0 (20.4 to 28.0)        | 22.5 (19.3 to 26.1)        | 15.7 (12.8 to 18.7)        | -2.9 (-3.9 to -1.8)                            | -34.6 (-44.0 to -24.2)              |
| Algeria                                       | 17.6 (15.2 to 20.0)        | 15.4 (13.8 to 17.0)        | 13.7 (11.9 to 15.4)        | 9.0 (5.6 to 11.7)          | -3.7 (-6.8 to -2.0)                            | -41.8 (-64.2 to -25.9)              |
| Bahrain                                       | 5.1 (4.6 to 5.6)           | 3.2 (2.9 to 3.6)           | 3.1 (2.7 to 3.5)           | 2.5 (1.2 to 4.4)           | -2.0 (-6.5 to 2.3)                             | -22.3 (-62.6 to 41.7)               |
| Egypt                                         | 21.2 (18.3 to 24.1)        | 8.6 (6.8 to 10.6)          | 7.3 (5.8 to 9.0)           | 4.2 (3.0 to 5.7)           | -4.8 (-6.8 to -2.6)                            | -50.9 (-63.8 to -32.7)              |
| Iran                                          | 21.7 (19.1 to 24.7)        | 11.9 (11.6 to 12.2)        | 8.3 (7.2 to 8.7)           | 5.5 (4.2 to 6.8)           | -5.2 (-7.0 to -3.8)                            | -53.7 (-65.1 to -43.4)              |
| Iraq                                          | 21.4 (19.4 to 23.6)        | 13.5 (11.6 to 15.6)        | 12.4 (10.7 to 14.4)        | 8.7 (7.4 to 10.7)          | -2.8 (-3.6 to -1.9)                            | -33.8 (-41.7 to -24.8)              |
| Jordan                                        | 16.6 (15.1 to 18.2)        | 9.3 (8.0 to 11.0)          | 8.7 (7.3 to 10.5)          | 6.3 (5.3 to 7.8)           | -2.4 (-3.2 to -1.6)                            | -30.5 (-37.8 to -21.4)              |
| Kuwait                                        | 6.2 (5.7 to 6.8)           | 5.3 (4.8 to 5.9)           | 4.7 (4.0 to 5.5)           | 3.5 (2.2 to 5.9)           | -3.0 (-5.8 to 0.6)                             | -34.4 (-57.9 to 9.8)                |
| Lebanon                                       | 9.0 (7.4 to 10.8)          | 4.6 (3.8 to 5.5)           | 4.3 (3.6 to 5.2)           | 3.1 (2.3 to 4.3)           | -2.7 (-4.2 to -0.7)                            | -32.6 (-46.5 to -10.0)              |
| Libya                                         | 12.7 (10.2 to 15.1)        | 5.3 (4.5 to 6.1)           | 5.2 (4.5 to 5.9)           | 3.1 (1.6 to 4.8)           | -3.7 (-8.0 to -0.7)                            | -40.1 (-69.7 to -9.5)               |
| Morocco                                       | 24.6 (21.5 to 28.0)        | 13.3 (10.9 to 15.9)        | 11.8 (9.9 to 14.3)         | 7.7 (5.3 to 9.9)           | -3.7 (-5.3 to -2.5)                            | -42.1 (-55.0 to -30.9)              |
| Palestine                                     | 11.2 (10.0 to 12.3)        | 7.2 (6.2 to 8.3)           | 6.4 (5.5 to 7.4)           | 4.1 (2.2 to 6.5)           | -4.0 (-7.9 to -0.8)                            | -42.8 (-69.2 to -11.4)              |
| Oman                                          | 8.1 (6.8 to 9.4)           | 6.0 (5.5 to 6.4)           | 5.7 (5.2 to 6.2)           | 4.2 (1.9 to 8.0)           | -2.8 (-7.8 to 1.9)                             | -29.9 (-68.8 to 32.1)               |
| Qatar                                         | 7.4 (6.2 to 8.7)           | 4.1 (3.4 to 4.8)           | 3.8 (3.1 to 4.6)           | 2.5 (1.9 to 3.3)           | -3.2 (-4.7 to -1.8)                            | -37.5 (-50.3 to -24.0)              |
| Saudi Arabia                                  | 13.8 (10.8 to 17.1)        | 4.3 (4.0 to 5.9)           | 4.3 (3.5 to 5.3)           | 1.8 (1.0 to 3.0)           | -6.8 (-10.6 to -3.5)                           | -62.5 (-79.6 to -40.4)              |
| Sudan                                         | 33.8 (29.4 to 38.8)        | 24.3 (19.6 to 29.6)        | 22.3 (17.2 to 27.6)        | 15.0 (10.4 to 20.2)        | -3.3 (-5.0 to -1.8)                            | -38.1 (-53.0 to -23.7)              |
| Syria                                         | 7.6 (6.6 to 8.6)           | 6.0 (5.1 to 7.1)           | 5.3 (4.3 to 6.4)           | 3.7 (2.1 to 5.5)           | -3.4 (-6.9 to -0.9)                            | -38.1 (-64.3 to -12.5)              |
| Tunisia                                       | 15.8 (13.7 to 18.0)        | 7.0 (5.8 to 8.3)           | 6.2 (5.2 to 7.4)           | 4.0 (2.8 to 5.4)           | -3.8 (-5.9 to -2.1)                            | -42.9 (-58.5 to -27.4)              |
| Turkey                                        | 18.4 (16.1 to 21.1)        | 9.1 (7.4 to 11.2)          | 7.6 (5.8 to 9.5)           | 4.5 (2.9 to 6.2)           | -4.8 (-7.2 to -2.9)                            | -51.0 (-65.9 to -35.1)              |
| United Arab Emirates                          | 5.5 (4.9 to 6.0)           | 4.4 (3.7 to 5.3)           | 4.0 (3.4 to 4.9)           | 2.5 (1.3 to 4.2)           | -4.0 (-7.9 to -0.5)                            | -42.5 (-69.4 to -7.5)               |
| Yemen                                         | 34.4 (30.4 to 38.6)        | 22.1 (17.3 to 27.2)        | 21.2 (16.3 to 26.7)        | 13.1 (8.2 to 18.0)         | -3.6 (-6.2 to -1.9)                            | -40.6 (-60.3 to -25.1)              |
| <b>South Asia</b>                             |                            |                            |                            |                            |                                                |                                     |
| <b>South Asia</b>                             |                            |                            |                            |                            |                                                |                                     |
| Bangladesh                                    | 42.5 (37.8 to 47.3)        | 25.5 (19.3 to 27.6)        | 21.0 (17.2 to 25.1)        | 15.2 (10.3 to 16.3)        | -3.8 (-4.8 to -3.0)                            | -43.7 (-51.4 to -36.3)              |
| Bhutan                                        | 41.4 (36.4 to 46.7)        | 20.5 (16.9 to 24.9)        | 18.3 (15.1 to 22.6)        | 10.7 (6.9 to 14.2)         | -4.5 (-7.1 to -3.0)                            | -48.0 (-65.7 to -36.0)              |
| India                                         | 38.0 (34.2 to 41.6)        | 26.0 (22.5 to 30.0)        | 23.5 (20.1 to 27.8)        | 14.7 (12.2 to 17.5)        | -3.8 (-4.6 to -3.0)                            | -43.6 (-60.2 to -36.4)              |
| Nepal                                         | 39.4 (35.8 to 43.1)        | 21.5 (17.8 to 23.5)        | 19.4 (15.7 to 23.5)        | 11.6 (8.6 to 14.7)         | -4.2 (-5.6 to -3.1)                            | -46.1 (-56.5 to -36.8)              |
| Pakistan                                      | 46.8 (40.2 to 53.2)        | 39.3 (32.6 to 47.3)        | 35.9 (29.3 to 44.0)        | 22.1 (15.4 to 29.0)        | -3.9 (-5.9 to -2.5)                            | -43.6 (-58.8 to -31.0)              |
| <b>Southeast Asia, East Asia, and Oceania</b> |                            |                            |                            |                            |                                                |                                     |
| <b>East Asia</b>                              |                            |                            |                            |                            |                                                |                                     |
| China                                         | 13.0 (11.8 to 14.3)        | 5.5 (4.8 to 6.4)           | 4.8 (4.1 to 5.8)           | 2.5 (1.6 to 3.7)           | -5.3 (-8.2 to -2.8)                            | -53.5 (-70.9 to -34.7)              |
| North Korea                                   | 12.7 (10.4 to 15.2)        | 10.7 (8.8 to 13.2)         | 9.7 (7.9 to 12.0)          | 7.3 (5.5 to 10.1)          | -2.6 (-4.0 to -0.8)                            | -31.9 (-45.4 to -10.9)              |
| Taiwan (Province of China)                    | 3.5 (3.2 to 3.8)           | 2.6 (2.4 to 2.8)           | 2.4 (2.0 to 2.8)           | 2.0 (1.4 to 2.9)           | -1.8 (-3.9 to 1.0)                             | -21.9 (-44.4 to 16.4)               |
| <b>Oceania</b>                                |                            |                            |                            |                            |                                                |                                     |
| American Samoa                                | 7.3 (6.5 to 8.2)           | 4.7 (4.1 to 5.3)           | 4.6 (4.0 to 5.2)           | 3.0 (2.4 to 3.8)           | -2.9 (-4.6 to -1.4)                            | -35.0 (-49.9 to -19.1)              |
| Federated States of Micronesia                | 14.5 (12.3 to 17.1)        | 9.3 (7.7 to 11.2)          | 8.7 (7.2 to 10.6)          | 6.2 (4.9 to 7.9)           | -2.7 (-3.8 to -1.6)                            | -32.0 (-43.5 to -21.4)              |
| Fiji                                          | 13.3 (11.2 to 15.4)        | 12.5 (10.5 to 14.8)        | 12.3 (10.3 to 14.7)        | 11.5 (8.3 to 15.6)         | -0.6 (-2.5 to 1.2)                             | -8.0 (-31.7 to 19.4)                |
| Guam                                          | 5.6 (5.1 to 6.2)           | 7.1 (6.3 to 8.2)           | 7.2 (6.2 to 8.3)           | 4.6 (2.5 to 6.8)           | -3.1 (-6.8 to -0.4)                            | -35.5 (-64.2 to -6.0)               |
| Kiribati                                      | 23.5 (20.2 to 27.2)        | 18.6 (15.5 to 22.2)        | 17.6 (14.7 to 21.2)        | 13.3 (10.8 to 16.2)        | -2.2 (-3.2 to -1.4)                            | -28.3 (-37.7 to -19.3)              |
| Marshall Islands                              | 16.3 (14.2 to 18.6)        | 11.9 (9.1 to 14.9)         | 11.2 (8.5 to 14.2)         | 8.1 (5.6 to 10.8)          | -2.6 (-3.8 to -1.5)                            | -32.2 (-43.8 to -20.6)              |
| Northern Mariana Islands                      | 3.8 (3.3 to 4.4)           | 4.5 (3.7 to 5.5)           | 4.4 (3.5 to 5.4)           | 3.4 (2.0 to 5.8)           | -2.1 (-5.3 to 1.6)                             | -24.7 (-55.0 to 26.7)               |
| Papua New Guinea                              | 25.5 (22.0 to 29.3)        | 22.4 (18.7 to 26.6)        | 21.4 (17.8 to 25.8)        | 15.8 (13.0 to 19.2)        | -2.3 (-3.0 to -1.6)                            | -29.1 (-36.3 to -21.5)              |
| Samoa                                         | 7.9 (6.1 to 9.8)           | 6.8 (5.6 to 8.1)           | 6.4 (5.3 to 7.8)           | 4.7 (3.6 to 6.1)           | -2.5 (-3.7 to -1.0)                            | -30.6 (-42.8 to -14.2)              |
| Solomon Islands                               | 16.9 (14.0 to 20.2)        | 13.4 (11.0 to 15.9)        | 12.6 (10.4 to 15.3)        | 9.4 (7.4 to 11.8)          | -2.3 (-3.4 to -1.3)                            | -29.5 (-40.2 to -17.9)              |
| Tonga                                         | 9.7 (8.2 to 11.3)          | 8.0 (6.5 to 9.7)           | 7.6 (6.2 to 9.2)           | 5.8 (4.7 to 7.2)           | -2.1 (-3.0 to -1.2)                            | -26.9 (-35.9 to -16.9)              |
| Vanuatu                                       | 15.6 (13.2 to 18.3)        | 14.5 (11.9 to 17.8)        | 14.1 (11.7 to 17.4)        | 10.6 (8.3 to 13.5)         | -2.1 (-3.3 to -1.0)                            | -26.7 (-38.6 to -14.0)              |
| <b>Southeast Asia</b>                         |                            |                            |                            |                            |                                                |                                     |
| Cambodia                                      | 32.5 (29.7 to 35.8)        | 17.7 (15.2 to 20.5)        | 16.2 (13.9 to 18.9)        | 10.6 (8.1 to 14.8)         | -3.5 (-4.8 to -1.3)                            | -40.5 (-51.6 to -17.2)              |
| Indonesia                                     | 24.9 (23.1 to 26.7)        | 14.8 (12.6 to 17.5)        | 13.7 (11.3 to 16.4)        | 8.9 (6.9 to 11.3)          | -3.4 (-4.7 to -2.2)                            | -39.6 (-51.0 to -28.6)              |
| Laos                                          | 50.4 (46.1 to 54.7)        | 28.0 (23.6 to 33.0)        | 25.6 (21.6 to 30.1)        | 16.2 (12.6 to 20.2)        | -3.7 (-4.9 to -2.5)                            | -42.2 (-52.0 to -30.9)              |
| Malaysia                                      | 4.7 (4.0 to 5.3)           | 4.6 (3.9 to 5.2)           | 3.9 (3.1 to 4.8)           | 2.7 (1.9 to 4.8)           | -3.6 (-5.8 to -1.6)                            | -40.6 (-57.8 to -21.3)              |
| Maldives                                      | 17.1 (15.1 to 19.2)        | 5.4 (4.5 to 6.4)           | 4.7 (4.0 to 5.7)           | 2.5 (1.6 to 4.4)           | -5.3 (-7.8 to -1.5)                            | -53.2 (-69.0 to -20.2)              |
| Mauritius                                     | 11.2 (10.4 to 12.1)        | 9.7 (8.9 to 10.6)          | 9.0 (7.9 to 10.3)          | 6.9 (5.6 to 8.6)           | -2.3 (-3.7 to -0.8)                            | -28.7 (-42.5 to -11.6)              |
| Myanmar                                       | 41.9 (36.0 to 49.4)        | 25.1 (19.9 to 26.9)        | 21.3 (18.3 to 24.6)        | 15.2 (9.2 to 17.1)         | -3.8 (-5.8 to -2.2)                            | -42.6 (-58.3 to -28.3)              |
| Philippines                                   | 16.4 (14.2 to 18.6)        | 13.1 (10.2 to 16.4)        | 12.0 (9.0 to 15.1)         | 8.8 (6.6 to 11.1)          | -2.7 (-3.6 to -1.8)                            | -32.9 (-41.8 to -23.1)              |
| Sri Lanka                                     | 8.7 (7.9 to 9.5)           | 6.0 (5.1 to 7.0)           | 5.4 (4.5 to 6.5)           | 4.2 (2.2 to 6.4)           | -2.7 (-4.6 to -0.4)                            | -30.8 (-42.9 to 6.7)                |
| Seychelles                                    | 7.6 (6.8 to 8.5)           | 7.2 (6.3 to 8.2)           | 6.9 (5.9 to 8.0)           | 4.7 (3.5 to 6.0)           | -2.8 (-4.7 to -1.6)                            | -34.2 (-50.5 to -20.9)              |
| Thailand                                      | 8.5 (7.1 to 10.0)          | 4.3 (3.9 to 4.7)           | 4.3 (3.7 to 4.8)           | 2.4 (1.8 to 3.4)           | -4.1 (-5.8 to -1.6)                            | -44.9 (-58.3 to -21.7)              |
| Timor-Leste                                   | 24.7 (22.2 to 27.2)        | 16.6 (14.3 to 19.2)        | 16.0 (13.8 to 18.6)        | 11.4 (9.9 to 14.6)         | -2.5 (-3.9 to -1.1)                            | -31.3 (-43.9 to -15.7)              |
| Vietnam                                       | 13.7 (12.5 to 15.1)        | 7.7 (6.6 to 9.2)           | 7.0 (5.8 to 8.4)           | 4.5 (3.6 to 5.8)           | -3.6 (-4.7 to -2.4)                            | -41.2 (-50.6 to -29.8)              |
| <b>Sub-Saharan Africa</b>                     |                            |                            |                            |                            |                                                |                                     |
| <b>Central Sub-Saharan Africa</b>             |                            |                            |                            |                            |                                                |                                     |
| Angola                                        | 44.6 (38.1 to 51.1)        | 24.5 (20.9 to 28.3)        | 22.9 (19.7 to 26.5)        | 13.9 (10.7 to 17.0)        | -3.8 (-5.4 to -2.7)                            | -43.4 (-55.2 to -32.9)              |
| Central African Republic                      | 47.7 (40.1 to 56.0)        | 31.2 (33.9 to 49.7)        | 39.4 (32.9 to 47.5)        | 31.2 (23.1 to 40.2)        | -1.9 (-3.5 to -0.3)                            | -24.1 (-41.3 to -4.8)               |
| Congo                                         | 28.9 (24.5 to 33.9)        | 20.4 (15.9 to 25.5)        | 19.8 (15.2 to 24.9)        | 14.2 (10.1 to 19.5)        | -2.5 (-4.0 to -0.9)                            | -30.4 (-45.1 to -12.5)              |
| Democratic Republic of the Congo              | 35.0 (31.3 to 39.1)        | 27.1 (21.5 to 33.7)        | 25.4 (19.5 to 32.6)        | 18.4 (13.5 to 24.6)        | -2.6 (-3.8 to -1.5)                            | -32.2 (-43.5 to -20.1)              |
| Equatorial Guinea                             | 38.0 (32.7 to 43.8)        | 21.0 (17.5 to 25.7)        | 20.1 (16.3 to 24.7)        | 14.6 (9.4 to 21.9)         | -2.6 (-5.0 to 0.0)                             | -30.6 (-52.7 to 0.2)                |
| Gabon                                         | 27.0 (24.3 to 29.9)        | 18.9 (15.9 to 22.1)        | 17.4 (14.6 to 20.6)        | 13.5 (9.7 to 17.4)         | -2.3 (-3.9 to -0.9)                            | -28.4 (-43.9 to -12.2)              |
| <b>Eastern Sub-Saharan Africa</b>             |                            |                            |                            |                            |                                                |                                     |
| Burundi                                       | 42.0 (38.5 to 45.7)        | 26.9 (23.6 to 30.7)        | 26.3 (23.0 to 30.5)        | 19.9 (16.5 to 24.1)        | -2.0 (-3.0 to -1.2)                            | -25.9 (-36.2 to -16.0)              |
| Comoros                                       | 42.6 (38.4 to 47.1)        | 27.5 (23.0 to 32.8)        | 25.2 (21.2 to 30.5)        | 16.4 (12.2 to 20.6)        | -3.5 (-5.2 to -2.4)                            | -40.3 (-54.3 to -29.9)              |
| Djibouti                                      | 30.3 (26.9 to 34.7)        | 20.1 (16.5 to 24.4)        | 18.4 (15.2 to 22.7)        | 11.5 (7.8 to 15.2)         | -3.8 (-6.2 to -2.5)                            | -42.8 (-60.8 to -31.4)              |
| Eritrea                                       | 24.7 (21.5 to 28.3)        | 18.3 (14.8 to 22.5)        | 17.0 (14.1 to 21.0)        | 12.7 (9.8 to 16.1)         | -2.5 (-3.8 to -1.4)                            | -30.5 (-43.4 to -18.4)              |
| Ethiopia                                      | 43.5 (40.3 to 46.6)        | 25.8 (22.4 to 29.7)        | 25.2 (19.9 to 27.5)        | 13.9 (11.5 to 17.0)        | -4.1 (-5.1 to -3.1)                            | -45.9 (-53.2 to -37.6)              |

|                                                                                            | Estimate in 2000 (95% UIs) | Estimate in 2015 (95% UIs) | Estimate in 2017 (95% UIs) | Estimate in 2030 (95% UIs) | Annualised rate of change, 2015-2030 (95% UIs) | Percent change, 2015-2030 (95% UIs) |
|--------------------------------------------------------------------------------------------|----------------------------|----------------------------|----------------------------|----------------------------|------------------------------------------------|-------------------------------------|
| Kenya                                                                                      | 27.0 (25.1 to 29.1)        | 19.9 (17.2 to 22.9)        | 18.7 (15.9 to 21.8)        | 13.7 (10.6 to 17.6)        | -2.5 (-3.9 to -1.1)                            | -31.3 (-44.3 to -15.7)              |
| Madagascar                                                                                 | 32.0 (29.3 to 34.9)        | 27.0 (22.8 to 32.1)        | 25.9 (21.8 to 31.3)        | 19.9 (15.6 to 25.2)        | -2.1 (-3.4 to -0.9)                            | -26.6 (-39.7 to -13.2)              |
| Malawi                                                                                     | 36.8 (32.9 to 41.0)        | 26.9 (23.6 to 30.9)        | 25.7 (22.2 to 30.2)        | 18.5 (15.0 to 22.3)        | -2.5 (-3.6 to -1.6)                            | -31.4 (-41.7 to -21.6)              |
| Mozambique                                                                                 | 41.7 (37.7 to 46.4)        | 26.3 (22.4 to 30.7)        | 24.5 (20.7 to 28.9)        | 16.4 (12.7 to 20.2)        | -3.2 (-4.5 to -2.2)                            | -37.5 (-49.2 to -28.0)              |
| Rwanda                                                                                     | 38.2 (30.1 to 46.7)        | 19.5 (14.8 to 24.5)        | 18.3 (13.7 to 23.3)        | 12.5 (9.1 to 16.0)         | -3.0 (-4.0 to -1.9)                            | -36.1 (-45.3 to -25.3)              |
| Somalia                                                                                    | 40.4 (36.0 to 45.0)        | 31.6 (26.3 to 37.4)        | 30.4 (25.5 to 36.5)        | 22.7 (18.2 to 27.7)        | -2.2 (-3.1 to -1.4)                            | -28.0 (-37.0 to -18.8)              |
| South Sudan                                                                                | 39.6 (35.8 to 43.9)        | 35.1 (29.8 to 41.1)        | 34.3 (28.9 to 40.5)        | 26.6 (20.2 to 33.1)        | -1.9 (-3.2 to -0.9)                            | -24.2 (-38.4 to -12.2)              |
| Tanzania                                                                                   | 33.5 (29.9 to 36.8)        | 25.5 (22.2 to 29.1)        | 24.0 (20.6 to 28.4)        | 16.4 (13.6 to 20.0)        | -2.9 (-3.8 to -1.9)                            | -35.5 (-43.8 to -25.3)              |
| Uganda                                                                                     | 34.3 (32.1 to 36.7)        | 26.1 (22.9 to 29.4)        | 24.4 (21.2 to 27.9)        | 15.3 (11.4 to 19.1)        | -3.6 (-5.4 to -2.3)                            | -41.3 (-55.2 to -29.6)              |
| Zambia                                                                                     | 32.8 (29.1 to 36.9)        | 23.3 (19.8 to 27.2)        | 22.4 (19.0 to 26.7)        | 16.4 (13.0 to 20.5)        | -2.4 (-3.6 to -1.2)                            | -29.7 (-41.9 to -16.3)              |
| <b>Southern Sub-Saharan Africa</b>                                                         |                            |                            |                            |                            |                                                |                                     |
| Botswana                                                                                   | 20.0 (16.2 to 23.9)        | 12.0 (9.9 to 14.8)         | 11.2 (9.3 to 13.8)         | 7.5 (4.6 to 11.3)          | -3.3 (-6.3 to -0.5)                            | -37.8 (-61.1 to -7.5)               |
| Lesotho                                                                                    | 38.5 (32.6 to 44.5)        | 30.7 (23.4 to 38.4)        | 28.8 (21.3 to 36.6)        | 21.3 (14.7 to 30.0)        | -2.5 (-4.1 to -0.7)                            | -30.5 (-45.6 to -9.9)               |
| Namibia                                                                                    | 22.2 (20.5 to 24.0)        | 16.8 (14.1 to 19.7)        | 16.6 (14.0 to 20.0)        | 12.6 (9.5 to 16.7)         | -1.9 (-3.5 to -0.3)                            | -24.7 (-40.7 to -4.3)               |
| South Africa                                                                               | 23.3 (21.5 to 25.2)        | 14.9 (13.0 to 17.1)        | 12.9 (11.0 to 15.1)        | 9.7 (7.3 to 12.4)          | -2.9 (-4.4 to -1.8)                            | -35.0 (-48.7 to -23.2)              |
| Swaziland                                                                                  | 20.9 (18.9 to 23.0)        | 16.0 (14.1 to 18.1)        | 15.5 (13.5 to 17.5)        | 12.4 (9.5 to 16.4)         | -1.7 (-3.3 to -0.0)                            | -22.4 (-39.3 to -0.2)               |
| Zimbabwe                                                                                   | 23.9 (22.0 to 25.9)        | 25.3 (22.0 to 28.6)        | 24.1 (20.9 to 27.7)        | 20.2 (15.3 to 25.9)        | -1.5 (-3.0 to -0.0)                            | -20.2 (-36.1 to -0.3)               |
| <b>Western Sub-Saharan Africa</b>                                                          |                            |                            |                            |                            |                                                |                                     |
| Benin                                                                                      | 39.9 (35.5 to 44.4)        | 31.5 (27.2 to 36.7)        | 29.3 (25.0 to 33.9)        | 18.1 (13.3 to 22.3)        | -3.7 (-5.5 to -2.5)                            | -42.3 (-55.9 to -31.6)              |
| Burkina Faso                                                                               | 37.5 (34.4 to 40.9)        | 27.9 (23.6 to 33.0)        | 26.4 (22.2 to 31.5)        | 18.7 (14.6 to 23.3)        | -2.7 (-4.0 to -1.6)                            | -32.9 (-45.3 to -21.0)              |
| Cameroon                                                                                   | 32.9 (28.5 to 37.5)        | 24.9 (19.4 to 30.5)        | 23.4 (17.7 to 29.5)        | 17.7 (12.6 to 23.8)        | -2.3 (-3.8 to -1.1)                            | -29.2 (-43.5 to -15.4)              |
| Cote d'Ivoire                                                                              | 17.3 (14.9 to 19.9)        | 13.0 (11.5 to 14.7)        | 11.8 (10.2 to 13.8)        | 7.5 (4.7 to 9.9)           | -3.8 (-6.8 to -2.2)                            | -42.6 (-54.9 to -27.7)              |
| Chad                                                                                       | 41.5 (37.4 to 45.8)        | 32.7 (28.0 to 38.0)        | 31.5 (27.1 to 36.7)        | 23.3 (18.1 to 29.2)        | -2.3 (-3.8 to -1.1)                            | -28.8 (-43.4 to -15.2)              |
| Cote d'Ivoire                                                                              | 46.0 (41.1 to 50.7)        | 34.5 (27.1 to 42.2)        | 32.1 (24.7 to 40.2)        | 22.1 (15.9 to 29.2)        | -3.0 (-4.3 to -1.6)                            | -35.9 (-47.7 to -21.7)              |
| The Gambia                                                                                 | 31.6 (28.3 to 35.4)        | 23.1 (19.5 to 27.3)        | 21.8 (18.2 to 26.4)        | 15.6 (12.6 to 19.1)        | -2.6 (-3.5 to -1.6)                            | -32.3 (-40.7 to -21.9)              |
| Ghana                                                                                      | 35.9 (32.9 to 39.0)        | 29.0 (24.2 to 34.3)        | 26.6 (21.6 to 32.3)        | 17.6 (13.5 to 22.1)        | -3.3 (-4.7 to -2.2)                            | -39.1 (-50.9 to -28.0)              |
| Guinea                                                                                     | 48.3 (44.2 to 52.7)        | 33.2 (28.6 to 38.5)        | 31.2 (26.6 to 37.1)        | 21.4 (17.7 to 25.6)        | -2.9 (-3.9 to -2.2)                            | -35.5 (-44.0 to -28.4)              |
| Guinea-Bissau                                                                              | 50.8 (45.7 to 56.8)        | 33.4 (28.7 to 38.9)        | 31.0 (26.4 to 36.3)        | 19.5 (15.5 to 23.5)        | -3.6 (-4.8 to -2.8)                            | -41.6 (-51.0 to -34.0)              |
| Liberia                                                                                    | 41.2 (37.7 to 45.1)        | 26.6 (23.4 to 30.1)        | 25.1 (22.3 to 28.4)        | 17.2 (14.8 to 20.0)        | -2.9 (-3.7 to -2.1)                            | -35.2 (-42.2 to -26.6)              |
| Mali                                                                                       | 52.8 (47.3 to 58.6)        | 39.9 (35.1 to 45.9)        | 37.9 (33.1 to 44.0)        | 26.5 (21.0 to 32.5)        | -2.8 (-4.1 to -1.5)                            | -33.5 (-46.3 to -20.0)              |
| Mauritania                                                                                 | 36.8 (32.6 to 41.1)        | 25.6 (22.1 to 29.6)        | 23.5 (20.2 to 27.2)        | 15.8 (13.0 to 18.8)        | -3.3 (-4.3 to -2.4)                            | -38.5 (-47.4 to -30.1)              |
| Niger                                                                                      | 40.8 (36.0 to 45.5)        | 25.4 (21.4 to 30.1)        | 24.0 (20.4 to 28.6)        | 16.7 (13.9 to 20.0)        | -2.8 (-3.6 to -1.9)                            | -34.1 (-41.8 to -25.1)              |
| Nigeria                                                                                    | 47.5 (42.8 to 52.4)        | 36.5 (32.2 to 40.8)        | 34.7 (30.5 to 39.5)        | 22.1 (14.4 to 28.3)        | -3.4 (-6.2 to -1.9)                            | -39.5 (-60.4 to -24.5)              |
| Sao Tome and Principe                                                                      | 20.6 (18.1 to 23.1)        | 14.5 (12.3 to 17.0)        | 13.3 (11.2 to 15.8)        | 9.3 (7.4 to 11.5)          | -3.0 (-4.0 to -2.0)                            | -35.8 (-45.4 to -25.4)              |
| Senegal                                                                                    | 35.3 (31.5 to 39.2)        | 21.9 (19.4 to 24.7)        | 20.6 (17.9 to 23.9)        | 13.7 (10.6 to 16.6)        | -3.2 (-4.8 to -2.1)                            | -37.6 (-51.1 to -27.1)              |
| Sierra Leone                                                                               | 54.8 (50.5 to 59.2)        | 34.5 (29.7 to 39.7)        | 32.7 (28.0 to 37.9)        | 23.4 (19.1 to 28.0)        | -2.6 (-3.6 to -1.7)                            | -32.2 (-42.0 to -22.9)              |
| Togo                                                                                       | 36.5 (31.5 to 41.6)        | 26.7 (22.7 to 31.2)        | 24.8 (21.1 to 29.7)        | 16.5 (13.6 to 19.9)        | -3.2 (-4.2 to -2.2)                            | -37.9 (-46.7 to -27.6)              |
| <b>Indicator 3.3.1: Age-standardised rate of new HIV infections (per 1,000 population)</b> |                            |                            |                            |                            |                                                |                                     |
| <b>Central Europe, Eastern Europe, and Central Asia</b>                                    |                            |                            |                            |                            |                                                |                                     |
| <b>Central Asia</b>                                                                        |                            |                            |                            |                            |                                                |                                     |
| Armenia                                                                                    | 0.0 (0.0 to 0.0)           | 0.1 (0.1 to 0.1)           | 0.1 (0.0 to 0.1)           | 0.1 (0.1 to 0.1)           | 0.3 (-0.3 to 0.9)                              | 4.8 (-3.9 to 13.9)                  |
| Azerbaijan                                                                                 | 0.0 (0.0 to 0.0)           | 0.0 (0.0 to 0.0)           | 0.0 (0.0 to 0.0)           | 0.0 (0.0 to 0.1)           | 0.9 (0.2 to 3.1)                               | 14.8 (3.6 to 58.5)                  |
| Georgia                                                                                    | 0.0 (0.0 to 0.0)           | 0.1 (0.1 to 0.2)           | 0.1 (0.1 to 0.2)           | 0.1 (0.1 to 0.2)           | 2.0 (1.5 to 2.5)                               | 34.3 (24.6 to 45.3)                 |
| Kazakhstan                                                                                 | 0.0 (0.0 to 0.0)           | 0.1 (0.1 to 0.1)           | 0.1 (0.1 to 0.2)           | 0.1 (0.1 to 0.2)           | 2.0 (1.2 to 3.2)                               | 34.9 (19.6 to 60.4)                 |
| Kyrgyzstan                                                                                 | 0.0 (0.0 to 0.1)           | 0.1 (0.1 to 0.1)           | 0.1 (0.1 to 0.2)           | 0.1 (0.1 to 0.2)           | 2.3 (1.4 to 3.1)                               | 41.0 (22.5 to 58.8)                 |
| Mongolia                                                                                   | 0.0 (0.0 to 0.0)           | 0.0 (0.0 to 0.0)           | 0.0 (0.0 to 0.0)           | 0.0 (0.0 to 0.1)           | -0.0 (-1.0 to 1.5)                             | -0.2 (-14.1 to 24.5)                |
| Tajikistan                                                                                 | 0.0 (0.0 to 0.0)           | 0.1 (0.0 to 0.1)           | 0.1 (0.0 to 0.1)           | 0.1 (0.0 to 0.1)           | 1.2 (0.3 to 3.3)                               | 20.7 (4.7 to 63.9)                  |
| Turkmenistan                                                                               | 0.0 (0.0 to 0.1)           | 0.0 (0.0 to 0.0)           | 0.0 (0.0 to 0.0)           | 0.1 (0.0 to 0.1)           | 3.9 (3.4 to 4.4)                               | 78.7 (66.5 to 92.1)                 |
| Uzbekistan                                                                                 | 0.0 (0.0 to 0.1)           | 0.1 (0.0 to 0.1)           | 0.1 (0.0 to 0.1)           | 0.1 (0.0 to 0.1)           | 1.3 (-0.0 to 3.5)                              | 22.6 (-0.3 to 68.5)                 |
| <b>Central Europe</b>                                                                      |                            |                            |                            |                            |                                                |                                     |
| Albania                                                                                    | 0.0 (0.0 to 0.0)           | 0.0 (0.0 to 0.0)           | 0.0 (0.0 to 0.0)           | 0.0 (0.0 to 0.0)           | 0.4 (0.1 to 1.2)                               | 6.8 (1.1 to 19.9)                   |
| Bosnia and Herzegovina                                                                     | 0.0 (0.0 to 0.0)           | 0.0 (0.0 to 0.0)           | 0.0 (0.0 to 0.0)           | 0.0 (0.0 to 0.0)           | 2.5 (2.0 to 3.0)                               | 46.0 (34.9 to 56.0)                 |
| Bulgaria                                                                                   | 0.0 (0.0 to 0.0)           | 0.0 (0.0 to 0.0)           | 0.0 (0.0 to 0.0)           | 0.0 (0.0 to 0.0)           | 1.4 (0.7 to 3.6)                               | 23.7 (10.3 to 72.6)                 |
| Croatia                                                                                    | 0.0 (0.0 to 0.0)           | 0.0 (0.0 to 0.0)           | 0.0 (0.0 to 0.0)           | 0.0 (0.0 to 0.0)           | 1.5 (1.0 to 3.2)                               | 25.3 (15.4 to 62.3)                 |
| Czech Republic                                                                             | 0.0 (0.0 to 0.0)           | 0.0 (0.0 to 0.0)           | 0.0 (0.0 to 0.0)           | 0.0 (0.0 to 0.0)           | 0.8 (0.4 to 1.6)                               | 13.2 (5.6 to 26.3)                  |
| Hungary                                                                                    | 0.0 (0.0 to 0.0)           | 0.0 (0.0 to 0.0)           | 0.0 (0.0 to 0.0)           | 0.0 (0.0 to 0.0)           | 4.0 (3.3 to 4.8)                               | 82.0 (63.9 to 104.7)                |
| Macedonia                                                                                  | 0.0 (0.0 to 0.0)           | 0.0 (0.0 to 0.0)           | 0.0 (0.0 to 0.0)           | 0.0 (0.0 to 0.0)           | 0.6 (0.2 to 1.1)                               | 9.8 (3.6 to 18.6)                   |
| Montenegro                                                                                 | 0.0 (0.0 to 0.0)           | 0.0 (0.0 to 0.0)           | 0.0 (0.0 to 0.0)           | 0.0 (0.0 to 0.0)           | 0.4 (0.1 to 0.8)                               | 6.7 (1.9 to 12.4)                   |
| Poland                                                                                     | 0.0 (0.0 to 0.0)           | 0.0 (0.0 to 0.0)           | 0.0 (0.0 to 0.0)           | 0.0 (0.0 to 0.0)           | 1.1 (0.6 to 2.9)                               | 17.6 (8.8 to 55.2)                  |
| Romania                                                                                    | 0.0 (0.0 to 0.0)           | 0.1 (0.0 to 0.1)           | 0.1 (0.0 to 0.1)           | 0.1 (0.0 to 0.1)           | 1.1 (0.6 to 2.0)                               | 18.9 (9.6 to 35.4)                  |
| Serbia                                                                                     | 0.0 (0.0 to 0.1)           | 0.0 (0.0 to 0.0)           | 0.0 (0.0 to 0.0)           | 0.0 (0.0 to 0.0)           | 2.3 (1.6 to 2.9)                               | 41.5 (28.1 to 54.8)                 |
| Slovakia                                                                                   | 0.0 (0.0 to 0.0)           | 0.0 (0.0 to 0.0)           | 0.0 (0.0 to 0.0)           | 0.0 (0.0 to 0.0)           | 0.9 (0.4 to 1.8)                               | 11.5 (5.6 to 30.0)                  |
| Slovenia                                                                                   | 0.0 (0.0 to 0.0)           | 0.0 (0.0 to 0.0)           | 0.0 (0.0 to 0.0)           | 0.0 (0.0 to 0.0)           | 2.0 (1.0 to 3.4)                               | 35.9 (15.3 to 65.3)                 |
| <b>Eastern Europe</b>                                                                      |                            |                            |                            |                            |                                                |                                     |
| Belarus                                                                                    | 0.1 (0.0 to 0.1)           | 0.2 (0.1 to 0.3)           | 0.2 (0.2 to 0.3)           | 0.3 (0.2 to 0.4)           | 1.8 (1.2 to 2.4)                               | 30.6 (19.1 to 43.2)                 |
| Estonia                                                                                    | 0.1 (0.1 to 0.1)           | 0.2 (0.1 to 0.2)           | 0.2 (0.2 to 0.3)           | 0.2 (0.3 to 0.2)           | 1.2 (0.3 to 2.2)                               | 20.8 (5.0 to 39.8)                  |
| Latvia                                                                                     | 0.1 (0.1 to 0.1)           | 0.2 (0.2 to 0.2)           | 0.2 (0.2 to 0.3)           | 0.3 (0.2 to 0.3)           | 1.9 (1.4 to 2.3)                               | 33.8 (23.9 to 41.3)                 |
| Lithuania                                                                                  | 0.0 (0.0 to 0.1)           | 0.1 (0.0 to 0.1)           | 0.1 (0.0 to 0.1)           | 0.1 (0.0 to 0.1)           | 1.4 (0.7 to 3.6)                               | 25.3 (11.3 to 71.1)                 |
| Moldova                                                                                    | 0.1 (0.1 to 0.1)           | 0.2 (0.1 to 0.2)           | 0.2 (0.1 to 0.3)           | 0.2 (0.1 to 0.3)           | 1.5 (0.9 to 3.2)                               | 26.2 (15.0 to 60.7)                 |
| Russia                                                                                     | 0.1 (0.1 to 0.2)           | 0.9 (0.8 to 1.1)           | 0.9 (0.8 to 1.1)           | 1.1 (0.9 to 1.3)           | 0.8 (0.5 to 1.2)                               | 12.8 (7.9 to 19.3)                  |
| Ukraine                                                                                    | 0.3 (0.2 to 0.5)           | 0.4 (0.3 to 0.5)           | 0.6 (0.4 to 0.7)           | 0.6 (0.5 to 0.8)           | 3.2 (2.8 to 3.8)                               | 62.5 (51.1 to 77.0)                 |
| <b>High-income</b>                                                                         |                            |                            |                            |                            |                                                |                                     |
| <b>Australasia</b>                                                                         |                            |                            |                            |                            |                                                |                                     |
| Australia                                                                                  | 0.1 (0.0 to 0.1)           | 0.1 (0.0 to 0.1)           | 0.1 (0.0 to 0.1)           | 0.1 (0.0 to 0.1)           | 1.5 (1.1 to 2.0)                               | 26.0 (18.1 to 35.0)                 |
| New Zealand                                                                                | 0.0 (0.0 to 0.1)           | 0.0 (0.0 to 0.1)           | 0.0 (0.0 to 0.1)           | 0.1 (0.0 to 0.1)           | 2.3 (1.4 to 3.2)                               | 41.5 (23.5 to 62.7)                 |
| <b>High-income Asia Pacific</b>                                                            |                            |                            |                            |                            |                                                |                                     |
| Brunei                                                                                     | 0.1 (0.0 to 0.1)           | 0.1 (0.0 to 0.1)           | 0.1 (0.0 to 0.1)           | 0.1 (0.1 to 0.1)           | 0.8 (0.5 to 1.8)                               | 13.0 (7.8 to 30.6)                  |
| Japan                                                                                      | 0.0 (0.0 to 0.0)           | 0.0 (0.0 to 0.0)           | 0.0 (0.0 to 0.0)           | 0.0 (0.0 to 0.0)           | 0.4 (0.1 to 1.4)                               | 5.5 (1.6 to 23.6)                   |
| South Korea                                                                                | 0.1 (0.0 to 0.1)           | 0.0 (0.0 to 0.0)           | 0.0 (0.0 to 0.0)           | 0.0 (0.0 to 0.1)           | 2.1 (1.4 to 2.9)                               | 38.3 (24.1 to 55.0)                 |
| Singapore                                                                                  | 0.0 (0.0 to 0.1)           | 0.0 (0.0 to 0.0)           | 0.0 (0.0 to 0.0)           | 0.0 (0.0 to 0.1)           | 3.3 (2.4 to 4.7)                               | 65.4 (42.8 to 101.6)                |

|                                     | Estimate in 2000 (95% UIs) | Estimate in 2015 (95% UIs) | Estimate in 2017 (95% UIs) | Estimate in 2030 (95% UIs) | Annualised rate of change, 2015-2030 (95% UIs) | Percent change, 2015-2030 (95% UIs) |
|-------------------------------------|----------------------------|----------------------------|----------------------------|----------------------------|------------------------------------------------|-------------------------------------|
| <b>High-income North America</b>    |                            |                            |                            |                            |                                                |                                     |
| Canada                              | 0.1 (0.1 to 0.1)           | 0.1 (0.1 to 0.2)           | 0.1 (0.1 to 0.2)           | 0.1 (0.1 to 0.2)           | 2.5 (1.6 to 3.5)                               | 45.0 (26.2 to 67.9)                 |
| Greenland                           | 0.1 (0.1 to 0.2)           | 0.2 (0.1 to 0.3)           | 0.2 (0.1 to 0.3)           | 0.2 (0.1 to 0.4)           | 2.3 (1.2 to 3.3)                               | 41.8 (19.3 to 64.1)                 |
| United States                       | 0.1 (0.1 to 0.2)           | 0.2 (0.1 to 0.3)           | 0.2 (0.1 to 0.3)           | 0.2 (0.1 to 0.4)           | 2.4 (1.7 to 3.1)                               | 44.0 (29.7 to 59.4)                 |
| <b>Southern Latin America</b>       |                            |                            |                            |                            |                                                |                                     |
| Argentina                           | 0.2 (0.1 to 0.4)           | 0.3 (0.1 to 0.5)           | 0.3 (0.1 to 0.5)           | 0.3 (0.1 to 0.5)           | 0.7 (0.2 to 1.4)                               | 10.5 (2.4 to 23.0)                  |
| Chile                               | 0.1 (0.1 to 0.2)           | 0.2 (0.1 to 0.3)           | 0.2 (0.1 to 0.4)           | 0.2 (0.1 to 0.4)           | 0.8 (0.6 to 1.0)                               | 12.4 (9.0 to 15.8)                  |
| Uruguay                             | 0.2 (0.1 to 0.3)           | 0.2 (0.2 to 0.3)           | 0.3 (0.2 to 0.3)           | 0.3 (0.2 to 0.4)           | 0.9 (0.0 to 2.5)                               | 15.2 (0.4 to 45.7)                  |
| <b>Western Europe</b>               |                            |                            |                            |                            |                                                |                                     |
| Andorra                             | 0.0 (0.0 to 0.2)           | 0.1 (0.0 to 0.3)           | 0.1 (0.0 to 0.3)           | 0.1 (0.0 to 0.3)           | 1.1 (-0.1 to 2.0)                              | 18.2 (-0.8 to 35.5)                 |
| Austria                             | 0.1 (0.0 to 0.1)           | 0.1 (0.0 to 0.1)           | 0.1 (0.1 to 0.1)           | 0.1 (0.1 to 0.2)           | 2.4 (1.6 to 4.2)                               | 44.9 (28.0 to 87.9)                 |
| Belgium                             | 0.1 (0.0 to 0.1)           | 0.1 (0.0 to 0.1)           | 0.1 (0.0 to 0.1)           | 0.1 (0.1 to 0.2)           | 1.3 (0.3 to 2.6)                               | 22.3 (4.6 to 48.1)                  |
| Cyprus                              | 0.0 (0.0 to 0.0)           | 0.1 (0.1 to 0.1)           | 0.1 (0.1 to 0.1)           | 0.1 (0.1 to 0.1)           | 0.5 (0.0 to 1.1)                               | 7.8 (0.6 to 18.0)                   |
| Denmark                             | 0.1 (0.0 to 0.1)           | 0.1 (0.0 to 0.1)           | 0.1 (0.0 to 0.1)           | 0.1 (0.0 to 0.1)           | 0.9 (0.1 to 2.1)                               | 15.6 (1.8 to 36.4)                  |
| Finland                             | 0.0 (0.0 to 0.0)           | 0.0 (0.0 to 0.0)           | 0.0 (0.0 to 0.0)           | 1.0 (0.1 to 2.9)           | 1.0 (0.1 to 2.9)                               | 17.5 (0.8 to 55.1)                  |
| France                              | 0.1 (0.1 to 0.1)           | 0.1 (0.0 to 0.1)           | 0.1 (0.0 to 0.1)           | 0.1 (0.1 to 0.2)           | 1.9 (1.3 to 2.5)                               | 33.1 (22.4 to 44.5)                 |
| Germany                             | 0.0 (0.0 to 0.1)           | 0.1 (0.0 to 0.1)           | 0.1 (0.0 to 0.1)           | 2.5 (1.5 to 3.4)           | 2.5 (1.5 to 3.4)                               | 45.0 (25.7 to 66.9)                 |
| Greece                              | 0.0 (0.0 to 0.1)           | 0.1 (0.0 to 0.1)           | 0.1 (0.0 to 0.1)           | 0.1 (0.1 to 0.1)           | 0.8 (0.4 to 1.1)                               | 12.6 (5.7 to 18.3)                  |
| Iceland                             | 0.0 (0.0 to 0.1)           | 0.1 (0.0 to 0.1)           | 0.1 (0.0 to 0.1)           | 0.1 (0.0 to 0.1)           | 0.5 (-0.1 to 2.9)                              | 8.4 (-2.2 to 55.5)                  |
| Ireland                             | 0.1 (0.0 to 0.1)           | 0.1 (0.0 to 0.2)           | 0.1 (0.1 to 0.2)           | 0.1 (0.1 to 0.2)           | 0.7 (0.1 to 1.8)                               | 11.8 (2.0 to 31.5)                  |
| Israel                              | 0.1 (0.0 to 0.1)           | 0.1 (0.0 to 0.1)           | 0.1 (0.0 to 0.1)           | 0.8 (0.3 to 2.0)           | 0.8 (0.3 to 2.0)                               | 13.5 (5.3 to 34.7)                  |
| Italy                               | 0.1 (0.1 to 0.1)           | 0.1 (0.1 to 0.2)           | 0.1 (0.1 to 0.2)           | 0.2 (0.1 to 0.3)           | 3.1 (2.1 to 4.1)                               | 59.0 (36.1 to 84.1)                 |
| Luxembourg                          | 0.1 (0.1 to 0.2)           | 0.1 (0.1 to 0.2)           | 0.1 (0.1 to 0.2)           | 0.2 (0.1 to 0.2)           | 0.8 (0.2 to 2.0)                               | 13.7 (2.6 to 35.2)                  |
| Malta                               | 0.1 (0.0 to 0.1)           | 0.2 (0.1 to 0.4)           | 0.2 (0.1 to 0.4)           | 0.2 (0.1 to 0.4)           | 0.4 (0.2 to 0.5)                               | 5.5 (2.6 to 8.4)                    |
| Netherlands                         | 0.1 (0.1 to 0.1)           | 0.0 (0.0 to 0.1)           | 0.0 (0.0 to 0.1)           | 0.0 (0.0 to 0.1)           | 1.4 (0.6 to 2.1)                               | 22.8 (10.0 to 36.0)                 |
| Norway                              | 0.1 (0.0 to 0.1)           | 0.1 (0.0 to 0.1)           | 0.1 (0.0 to 0.1)           | 0.1 (0.0 to 0.1)           | 0.9 (0.4 to 2.2)                               | 15.5 (5.8 to 38.3)                  |
| Portugal                            | 0.6 (0.4 to 0.8)           | 0.8 (0.4 to 1.2)           | 0.8 (0.4 to 1.2)           | 0.6 (0.3 to 0.9)           | -1.3 (-2.0 to -0.4)                            | -17.6 (-26.2 to -5.3)               |
| Spain                               | 0.1 (0.1 to 0.1)           | 0.1 (0.1 to 0.2)           | 0.1 (0.1 to 0.2)           | 2.4 (1.5 to 3.3)           | 2.4 (1.5 to 3.3)                               | 43.5 (24.7 to 64.2)                 |
| Sweden                              | 0.1 (0.0 to 0.1)           | 0.1 (0.0 to 0.1)           | 0.1 (0.0 to 0.1)           | 0.1 (0.0 to 0.1)           | 0.1 (-0.2 to 0.6)                              | 2.0 (-2.3 to 9.8)                   |
| Switzerland                         | 0.1 (0.1 to 0.1)           | 0.1 (0.0 to 0.1)           | 0.1 (0.0 to 0.1)           | 0.1 (0.0 to 0.1)           | 2.3 (1.5 to 3.2)                               | 42.5 (25.1 to 60.8)                 |
| United Kingdom                      | 0.1 (0.1 to 0.2)           | 0.1 (0.1 to 0.1)           | 0.1 (0.1 to 0.1)           | 0.1 (0.1 to 0.2)           | 0.5 (0.1 to 1.1)                               | 8.0 (2.0 to 17.6)                   |
| <b>Latin America and Caribbean</b>  |                            |                            |                            |                            |                                                |                                     |
| <b>Andean Latin America</b>         |                            |                            |                            |                            |                                                |                                     |
| Bolivia                             | 0.1 (0.0 to 0.4)           | 0.2 (0.0 to 0.8)           | 0.2 (0.0 to 0.8)           | 0.2 (0.0 to 0.9)           | 1.3 (0.1 to 3.1)                               | 21.8 (2.1 to 58.1)                  |
| Ecuador                             | 0.1 (0.1 to 0.2)           | 0.2 (0.2 to 0.2)           | 0.2 (0.2 to 0.2)           | 0.1 (-0.1 to 0.3)          | 0.1 (-0.1 to 0.3)                              | 1.8 (-1.4 to 5.1)                   |
| Peru                                | 0.1 (0.1 to 0.1)           | 0.2 (0.1 to 0.3)           | 0.2 (0.1 to 0.3)           | 0.2 (0.2 to 0.3)           | 0.9 (0.3 to 1.7)                               | 14.9 (4.6 to 28.6)                  |
| <b>Caribbean</b>                    |                            |                            |                            |                            |                                                |                                     |
| Antigua and Barbuda                 | 0.1 (0.1 to 0.1)           | 0.1 (0.1 to 0.1)           | 0.1 (0.1 to 0.1)           | 0.1 (0.1 to 0.2)           | 2.1 (1.8 to 2.6)                               | 37.9 (30.2 to 46.8)                 |
| The Bahamas                         | 0.7 (0.6 to 0.8)           | 0.9 (0.8 to 1.0)           | 0.9 (0.8 to 1.1)           | 0.9 (0.7 to 1.0)           | -0.7 (-1.6 to 0.2)                             | -9.8 (-21.7 to 3.3)                 |
| Barbados                            | 0.3 (0.3 to 0.3)           | 0.2 (0.2 to 0.3)           | 0.2 (0.2 to 0.4)           | 0.2 (0.1 to 0.3)           | -1.1 (-2.3 to 0.0)                             | -14.6 (-28.9 to 0.4)                |
| Belize                              | 0.7 (0.1 to 0.9)           | 0.6 (0.5 to 0.7)           | 0.6 (0.5 to 0.7)           | 0.6 (0.5 to 0.7)           | -0.2 (-0.7 to 0.3)                             | -3.4 (-10.6 to 5.3)                 |
| Bermuda                             | 0.1 (0.1 to 0.1)           | 0.1 (0.1 to 0.1)           | 0.1 (0.1 to 0.1)           | 0.1 (0.1 to 0.2)           | 2.6 (2.2 to 3.0)                               | 47.3 (39.3 to 57.7)                 |
| Cuba                                | 0.0 (0.0 to 0.1)           | 0.2 (0.1 to 0.3)           | 0.2 (0.1 to 0.3)           | 0.2 (0.1 to 0.3)           | 0.3 (-0.1 to 0.8)                              | 5.2 (-2.1 to 13.5)                  |
| Dominica                            | 0.1 (0.1 to 0.1)           | 0.1 (0.1 to 0.1)           | 0.1 (0.1 to 0.1)           | 0.1 (0.1 to 0.1)           | 2.1 (1.7 to 2.5)                               | 36.6 (28.1 to 45.7)                 |
| Dominican Republic                  | 0.8 (0.6 to 1.1)           | 0.4 (0.2 to 0.6)           | 0.4 (0.2 to 0.5)           | 0.3 (0.2 to 0.5)           | -1.5 (-2.2 to -0.7)                            | -20.0 (-28.2 to -9.5)               |
| Grenada                             | 0.1 (0.1 to 0.1)           | 0.1 (0.1 to 0.1)           | 0.1 (0.1 to 0.1)           | 0.1 (0.1 to 0.1)           | 3.0 (2.5 to 3.5)                               | 56.6 (45.6 to 69.8)                 |
| Guyana                              | 1.1 (0.9 to 1.3)           | 0.9 (0.6 to 1.1)           | 0.8 (0.6 to 1.0)           | 0.7 (0.5 to 0.9)           | -1.9 (-2.7 to -1.2)                            | -24.2 (-32.8 to -16.4)              |
| Haiti                               | 1.1 (0.6 to 1.5)           | 0.8 (0.6 to 1.1)           | 0.7 (0.5 to 0.9)           | 0.7 (0.5 to 0.9)           | -1.8 (-2.5 to -1.2)                            | -24.1 (-31.4 to -16.6)              |
| Jamaica                             | 0.3 (0.3 to 0.4)           | 0.5 (0.4 to 0.6)           | 0.4 (0.3 to 0.6)           | 0.4 (0.3 to 0.5)           | -1.2 (-2.0 to -0.5)                            | -16.8 (-25.6 to -6.8)               |
| Puerto Rico                         | 0.1 (0.1 to 0.1)           | 0.1 (0.1 to 0.1)           | 0.1 (0.1 to 0.1)           | 0.1 (0.1 to 0.1)           | 2.9 (2.5 to 3.3)                               | 54.8 (45.8 to 64.9)                 |
| Saint Lucia                         | 0.1 (0.1 to 0.1)           | 0.1 (0.0 to 0.1)           | 0.1 (0.0 to 0.1)           | 0.1 (0.1 to 0.1)           | 2.6 (2.2 to 3.1)                               | 48.3 (39.7 to 59.9)                 |
| Saint Vincent and the Grenadines    | 0.2 (0.2 to 0.3)           | 0.2 (0.2 to 0.2)           | 0.2 (0.1 to 0.2)           | 0.3 (0.2 to 0.4)           | 2.4 (1.9 to 2.9)                               | 43.4 (33.6 to 55.6)                 |
| Suriname                            | 0.6 (0.5 to 0.6)           | 0.4 (0.3 to 0.5)           | 0.4 (0.3 to 0.5)           | 0.3 (0.3 to 0.5)           | -0.5 (-1.4 to 0.3)                             | -7.4 (-18.6 to 5.0)                 |
| Trinidad and Tobago                 | 0.4 (0.4 to 0.5)           | 0.3 (0.3 to 0.4)           | 0.3 (0.3 to 0.4)           | 0.3 (0.2 to 0.4)           | -0.5 (-1.3 to 0.3)                             | -6.6 (-17.9 to 5.4)                 |
| Virgin Islands, U.S.                | 0.1 (0.1 to 0.1)           | 0.2 (0.1 to 0.3)           | 0.2 (0.1 to 0.3)           | 0.2 (0.2 to 0.4)           | 2.0 (0.4 to 2.8)                               | 36.1 (6.5 to 51.4)                  |
| <b>Central Latin America</b>        |                            |                            |                            |                            |                                                |                                     |
| Colombia                            | 0.1 (0.1 to 0.1)           | 0.2 (0.1 to 0.2)           | 0.2 (0.1 to 0.2)           | 0.2 (0.1 to 0.3)           | 0.5 (-0.0 to 1.6)                              | 8.3 (-0.2 to 27.6)                  |
| Costa Rica                          | 0.1 (0.1 to 0.1)           | 0.1 (0.1 to 0.1)           | 0.1 (0.1 to 0.1)           | 0.1 (0.1 to 0.1)           | 1.2 (0.4 to 2.1)                               | 19.7 (5.5 to 37.3)                  |
| El Salvador                         | 0.3 (0.2 to 0.3)           | 0.2 (0.1 to 0.3)           | 0.2 (0.1 to 0.3)           | 0.2 (0.1 to 0.3)           | 0.0 (-1.1 to 1.3)                              | 1.1 (-15.2 to 21.1)                 |
| Guatemala                           | 0.2 (0.2 to 0.4)           | 0.1 (0.1 to 0.2)           | 0.1 (0.1 to 0.3)           | 0.2 (0.1 to 0.3)           | 2.6 (1.5 to 3.6)                               | 49.1 (25.1 to 72.7)                 |
| Honduras                            | 0.1 (0.0 to 0.1)           | 0.1 (0.0 to 0.1)           | 0.1 (0.0 to 0.1)           | 0.1 (0.1 to 0.1)           | 1.9 (0.8 to 3.3)                               | 33.3 (12.0 to 65.4)                 |
| Mexico                              | 0.1 (0.1 to 0.1)           | 0.1 (0.1 to 0.2)           | 0.1 (0.1 to 0.2)           | 0.2 (0.1 to 0.2)           | 1.5 (0.8 to 2.3)                               | 25.0 (12.5 to 40.6)                 |
| Nicaragua                           | 0.1 (0.1 to 0.1)           | 0.3 (0.2 to 0.4)           | 0.3 (0.2 to 0.4)           | 0.3 (0.2 to 0.5)           | 0.1 (-0.5 to 1.0)                              | 1.4 (-6.9 to 16.0)                  |
| Panama                              | 0.3 (0.2 to 0.3)           | 0.5 (0.4 to 0.6)           | 0.5 (0.4 to 0.6)           | 0.4 (0.3 to 0.6)           | -1.0 (-1.5 to -0.6)                            | -14.3 (-20.4 to -8.2)               |
| Venezuela                           | 0.2 (0.1 to 0.2)           | 0.2 (0.2 to 0.3)           | 0.2 (0.2 to 0.3)           | 0.3 (0.2 to 0.3)           | 0.6 (0.3 to 1.0)                               | 8.7 (4.1 to 15.6)                   |
| <b>Tropical Latin America</b>       |                            |                            |                            |                            |                                                |                                     |
| Brazil                              | 0.2 (0.2 to 0.3)           | 0.4 (0.3 to 0.4)           | 0.4 (0.3 to 0.4)           | 0.4 (0.3 to 0.5)           | 0.7 (0.5 to 0.9)                               | 10.8 (8.6 to 14.1)                  |
| Paraguay                            | 0.1 (0.1 to 0.2)           | 0.3 (0.2 to 0.3)           | 0.2 (0.1 to 0.3)           | 0.2 (0.1 to 0.3)           | 0.5 (-0.2 to 1.4)                              | 7.9 (-2.4 to 23.3)                  |
| <b>North Africa and Middle East</b> |                            |                            |                            |                            |                                                |                                     |
| <b>North Africa and Middle East</b> |                            |                            |                            |                            |                                                |                                     |
| Afghanistan                         | 0.0 (0.0 to 0.0)           | 0.0 (0.0 to 0.1)           | 0.0 (0.0 to 0.1)           | 0.0 (0.0 to 0.1)           | 0.8 (-0.3 to 2.8)                              | 14.6 (-4.5 to 52.2)                 |
| Algeria                             | 0.0 (0.0 to 0.1)           | 0.0 (0.0 to 0.1)           | 0.0 (0.0 to 0.1)           | 0.0 (0.0 to 0.1)           | -2.5 (-36.7 to 1.9)                            | -2.4 (-99.6 to 33.9)                |
| Bahrain                             | 0.0 (0.0 to 0.0)           | 0.0 (0.0 to 0.0)           | 0.0 (0.0 to 0.0)           | 0.0 (0.0 to 0.0)           | 2.6 (2.1 to 3.2)                               | 48.0 (37.1 to 61.6)                 |
| Egypt                               | 0.0 (0.0 to 0.0)           | 0.0 (0.0 to 0.0)           | 0.0 (0.0 to 0.0)           | 0.0 (0.0 to 0.0)           | 0.9 (0.2 to 2.5)                               | 15.5 (2.6 to 46.5)                  |
| Iran                                | 0.0 (0.0 to 0.0)           | 0.0 (0.0 to 0.1)           | 0.0 (0.0 to 0.1)           | 0.0 (0.4 to 1.8)           | 1.0 (0.4 to 1.8)                               | 16.1 (5.7 to 30.2)                  |
| Iraq                                | 0.0 (0.0 to 0.0)           | 0.0 (0.0 to 0.0)           | 0.0 (0.0 to 0.0)           | 0.0 (0.0 to 0.0)           | 0.6 (0.1 to 1.8)                               | 9.4 (0.9 to 30.4)                   |
| Jordan                              | 0.0 (0.0 to 0.0)           | 0.0 (0.0 to 0.0)           | 0.0 (0.0 to 0.0)           | 0.0 (0.0 to 0.0)           | 1.3 (0.7 to 2.0)                               | 22.4 (11.6 to 35.4)                 |
| Kuwait                              | 0.0 (0.0 to 0.0)           | 0.0 (0.0 to 0.0)           | 0.0 (0.0 to 0.0)           | 0.0 (0.0 to 0.0)           | 3.4 (2.6 to 4.2)                               | 65.6 (48.8 to 86.9)                 |
| Lebanon                             | 0.0 (0.0 to 0.1)           | 0.0 (0.0 to 0.1)           | 0.0 (0.0 to 0.1)           | 0.0 (0.0 to 0.2)           | 2.0 (0.6 to 3.5)                               | 36.3 (9.0 to 69.7)                  |
| Libya                               | 0.0 (0.0 to 0.1)           | 0.0 (0.0 to 0.1)           | 0.0 (0.0 to 0.1)           | 0.0 (0.0 to 0.1)           | 1.6 (0.6 to 3.2)                               | 28.3 (9.4 to 61.5)                  |

|                                               | Estimate in 2000 (95% UIs) | Estimate in 2015 (95% UIs) | Estimate in 2017 (95% UIs) | Estimate in 2020 (95% UIs) | Annualised rate of change, 2015-2020 (95% UIs) | Percent change, 2015-2020 (95% UIs) |
|-----------------------------------------------|----------------------------|----------------------------|----------------------------|----------------------------|------------------------------------------------|-------------------------------------|
| Morocco                                       | 0.1 (0.0 to 0.2)           | 0.0 (0.0 to 0.1)           | 0.0 (0.0 to 0.1)           | 0.0 (0.0 to 0.2)           | 2.0 (0.4 to 3.7)                               | 35.6 (5.9 to 73.3)                  |
| Palestine                                     | 0.0 (0.0 to 0.0)           | 0.0 (0.0 to 0.0)           | 0.0 (0.0 to 0.0)           | 0.0 (0.0 to 0.0)           | 0.5 (0.2 to 1.1)                               | 7.1 (2.5 to 17.4)                   |
| Oman                                          | 0.1 (0.1 to 0.1)           | 0.1 (0.0 to 0.1)           | 0.1 (0.0 to 0.1)           | 0.1 (0.1 to 0.2)           | 4.4 (2.8 to 6.7)                               | 94.3 (53.2 to 171.4)                |
| Qatar                                         | 0.0 (0.0 to 0.0)           | 0.0 (0.0 to 0.0)           | 0.0 (0.0 to 0.0)           | 0.0 (0.0 to 0.0)           | 3.7 (3.1 to 4.5)                               | 75.3 (58.6 to 95.2)                 |
| Saudi Arabia                                  | 0.0 (0.0 to 0.0)           | 0.0 (0.0 to 0.0)           | 0.0 (0.0 to 0.0)           | 0.0 (0.0 to 0.0)           | 2.2 (0.9 to 2.9)                               | 38.8 (14.6 to 54.5)                 |
| Sudan                                         | 0.2 (0.2 to 0.3)           | 0.2 (0.1 to 0.4)           | 0.2 (0.1 to 0.3)           | 0.2 (0.1 to 0.4)           | 0.2 (-1.0 to 1.1)                              | 4.0 (-13.5 to 18.5)                 |
| Syria                                         | 0.0 (0.0 to 0.0)           | 0.0 (0.0 to 0.0)           | 0.0 (0.0 to 0.0)           | 0.0 (0.0 to 0.0)           | 1.6 (0.6 to 2.9)                               | 28.4 (9.9 to 54.1)                  |
| Tunisia                                       | 0.0 (0.0 to 0.1)           | 0.0 (0.0 to 0.1)           | 0.0 (0.0 to 0.1)           | 0.0 (0.0 to 0.2)           | 0.8 (0.2 to 2.2)                               | 13.3 (2.8 to 40.0)                  |
| Turkey                                        | 0.0 (0.0 to 0.0)           | 0.0 (0.0 to 0.0)           | 0.0 (0.0 to 0.0)           | 0.0 (0.0 to 0.0)           | 0.6 (0.3 to 1.5)                               | 9.3 (4.6 to 24.5)                   |
| United Arab Emirates                          | 0.0 (0.0 to 0.1)           | 0.0 (0.0 to 0.2)           | 0.0 (0.0 to 0.3)           | 0.1 (0.0 to 0.3)           | 2.6 (-3.3 to 8.5)                              | 59.5 (-39.5 to 258.6)               |
| Yemen                                         | 0.0 (0.0 to 0.1)           | 0.0 (0.0 to 0.2)           | 0.0 (0.0 to 0.2)           | 0.0 (0.0 to 0.2)           | 1.5 (0.0 to 3.3)                               | 26.4 (0.7 to 64.4)                  |
| <b>South Asia</b>                             |                            |                            |                            |                            |                                                |                                     |
| <b>South Asia</b>                             |                            |                            |                            |                            |                                                |                                     |
| Bangladesh                                    | 0.0 (0.0 to 0.0)           | 0.0 (0.0 to 0.0)           | 0.0 (0.0 to 0.0)           | 0.0 (0.0 to 0.0)           | 1.4 (0.1 to 2.8)                               | 23.4 (1.4 to 52.6)                  |
| Bhutan                                        | 0.1 (0.0 to 0.3)           | 0.1 (0.0 to 0.6)           | 0.1 (0.0 to 0.6)           | 0.1 (0.0 to 0.7)           | 1.5 (0.5 to 3.2)                               | 26.2 (7.3 to 61.0)                  |
| India                                         | 0.3 (0.2 to 0.3)           | 0.1 (0.1 to 0.1)           | 0.1 (0.0 to 0.1)           | 0.1 (0.1 to 0.1)           | 0.6 (-0.3 to 1.5)                              | 9.7 (-3.7 to 26.1)                  |
| Nepal                                         | 0.3 (0.0 to 1.2)           | 0.3 (0.0 to 0.4)           | 0.1 (0.0 to 0.3)           | 0.1 (0.0 to 0.4)           | 1.3 (-0.3 to 2.6)                              | 21.8 (-4.6 to 48.6)                 |
| Pakistan                                      | 0.0 (0.0 to 0.0)           | 0.1 (0.0 to 0.3)           | 0.1 (0.0 to 0.3)           | 0.1 (0.0 to 0.3)           | 1.0 (0.1 to 2.9)                               | 17.4 (1.1 to 54.6)                  |
| <b>Southeast Asia, East Asia, and Oceania</b> |                            |                            |                            |                            |                                                |                                     |
| <b>East Asia</b>                              |                            |                            |                            |                            |                                                |                                     |
| China                                         | 0.0 (0.0 to 0.1)           | 0.0 (0.0 to 0.0)           | 0.0 (0.0 to 0.0)           | 0.0 (0.0 to 0.1)           | 2.0 (1.4 to 2.8)                               | 35.5 (24.0 to 51.4)                 |
| North Korea                                   | 0.0 (0.0 to 0.3)           | 0.0 (0.0 to 0.3)           | 0.1 (0.0 to 0.3)           | 0.1 (0.0 to 0.3)           | 1.0 (-0.2 to 2.1)                              | 16.5 (-3.3 to 36.7)                 |
| Taiwan (Province of China)                    | 0.0 (0.0 to 0.0)           | 0.0 (0.0 to 0.0)           | 0.0 (0.0 to 0.0)           | 0.0 (0.0 to 0.0)           | 1.8 (1.3 to 2.2)                               | 31.5 (22.4 to 39.8)                 |
| <b>Oceania</b>                                |                            |                            |                            |                            |                                                |                                     |
| American Samoa                                | 0.0 (0.0 to 0.0)           | 0.0 (0.0 to 0.0)           | 0.0 (0.0 to 0.0)           | 0.0 (0.0 to 0.0)           | 2.4 (1.8 to 2.9)                               | 43.5 (30.0 to 53.4)                 |
| Federated States of Micronesia                | 0.1 (0.0 to 0.4)           | 0.9 (0.0 to 4.5)           | 0.8 (0.0 to 4.5)           | 0.8 (0.0 to 4.4)           | -0.5 (-8.4 to 5.8)                             | 6.0 (-71.5 to 138.8)                |
| Fiji                                          | 0.0 (0.0 to 0.0)           | 0.1 (0.0 to 0.1)           | 0.1 (0.0 to 0.1)           | 0.1 (0.1 to 0.1)           | 2.3 (1.5 to 4.1)                               | 42.3 (25.7 to 83.6)                 |
| Guam                                          | 0.0 (0.0 to 0.0)           | 0.0 (0.0 to 0.1)           | 0.1 (0.0 to 0.1)           | 0.1 (0.0 to 0.1)           | 2.8 (2.4 to 3.2)                               | 53.3 (43.8 to 62.4)                 |
| Kiribati                                      | 0.0 (0.0 to 0.0)           | 0.0 (0.0 to 0.0)           | 0.0 (0.0 to 0.0)           | 0.0 (0.0 to 0.0)           | 2.8 (1.7 to 4.8)                               | 53.6 (28.5 to 104.7)                |
| Marshall Islands                              | 0.0 (0.0 to 0.3)           | 0.1 (0.0 to 0.7)           | 0.1 (0.0 to 0.9)           | 0.2 (0.0 to 1.0)           | 2.3 (0.5 to 3.8)                               | 43.5 (7.7 to 76.2)                  |
| Northern Mariana Islands                      | 0.0 (0.0 to 0.0)           | 0.0 (0.0 to 0.0)           | 0.0 (0.0 to 0.0)           | 0.0 (0.0 to 0.0)           | 1.4 (-0.6 to 2.4)                              | 23.3 (-8.6 to 42.5)                 |
| Papua New Guinea                              | 0.9 (0.2 to 2.4)           | 3.0 (0.0 to 1.1)           | 3.0 (0.0 to 1.3)           | 3.0 (0.0 to 1.2)           | 4.1 (3.1 to 2.8)                               | 11.7 (-36.9 to 51.8)                |
| Samoa                                         | 0.0 (0.0 to 0.3)           | 0.1 (0.0 to 0.8)           | 0.1 (0.0 to 0.9)           | 0.2 (0.0 to 1.0)           | 2.0 (0.2 to 3.6)                               | 36.6 (3.7 to 70.4)                  |
| Solomon Islands                               | 0.0 (0.0 to 0.3)           | 0.1 (0.0 to 0.7)           | 0.1 (0.0 to 0.8)           | 0.2 (0.0 to 1.0)           | 2.4 (0.5 to 3.9)                               | 44.0 (7.5 to 78.3)                  |
| Tonga                                         | 0.0 (0.0 to 0.0)           | 0.0 (0.0 to 0.0)           | 0.0 (0.0 to 0.0)           | 0.0 (0.0 to 0.1)           | 2.3 (0.6 to 3.3)                               | 42.2 (10.1 to 63.0)                 |
| Vanuatu                                       | 0.1 (0.0 to 0.3)           | 0.1 (0.0 to 0.8)           | 0.1 (0.0 to 0.9)           | 0.2 (0.0 to 1.0)           | 2.4 (0.5 to 3.9)                               | 45.0 (8.2 to 79.4)                  |
| <b>Southeast Asia</b>                         |                            |                            |                            |                            |                                                |                                     |
| Cambodia                                      | 0.6 (0.2 to 1.2)           | 0.1 (0.0 to 0.2)           | 0.1 (0.0 to 0.1)           | 0.1 (0.0 to 0.1)           | -2.2 (-4.0 to -1.2)                            | -27.4 (-45.0 to -16.9)              |
| Indonesia                                     | 0.0 (0.0 to 0.0)           | 0.1 (0.1 to 0.1)           | 0.1 (0.1 to 0.1)           | 0.1 (0.1 to 0.1)           | 0.5 (0.1 to 1.1)                               | 7.9 (1.9 to 18.1)                   |
| Laos                                          | 0.2 (0.0 to 1.2)           | 0.1 (0.0 to 0.7)           | 0.1 (0.0 to 0.7)           | 0.1 (0.0 to 0.8)           | 1.5 (0.2 to 2.7)                               | 26.1 (2.8 to 49.2)                  |
| Malaysia                                      | 0.1 (0.1 to 0.2)           | 0.1 (0.1 to 0.1)           | 0.1 (0.1 to 0.2)           | 0.2 (0.1 to 0.2)           | 3.1 (2.3 to 3.9)                               | 60.4 (40.5 to 79.7)                 |
| Maldives                                      | 0.0 (0.0 to 0.0)           | 0.0 (0.0 to 0.0)           | 0.0 (0.0 to 0.0)           | 0.0 (0.0 to 0.0)           | 2.2 (1.7 to 2.7)                               | 40.0 (29.7 to 50.6)                 |
| Mauritius                                     | 0.1 (0.0 to 0.1)           | 0.3 (0.2 to 0.4)           | 0.2 (0.2 to 0.3)           | 0.3 (0.2 to 0.4)           | -0.1 (-0.9 to 0.7)                             | -1.8 (-12.8 to 10.4)                |
| Myanmar                                       | 0.7 (0.6 to 0.8)           | 0.2 (0.1 to 0.3)           | 0.2 (0.1 to 0.2)           | 0.3 (0.2 to 0.4)           | 2.0 (1.4 to 2.6)                               | 35.8 (22.8 to 47.4)                 |
| Philippines                                   | 0.1 (0.1 to 0.1)           | 0.1 (0.1 to 0.2)           | 0.1 (0.1 to 0.2)           | 0.2 (0.1 to 0.3)           | 2.5 (1.2 to 3.5)                               | 46.8 (19.2 to 68.9)                 |
| Sri Lanka                                     | 0.0 (0.0 to 0.0)           | 0.0 (0.0 to 0.0)           | 0.0 (0.0 to 0.0)           | 0.0 (0.0 to 0.0)           | 3.2 (2.2 to 4.0)                               | 62.9 (38.2 to 81.8)                 |
| Seychelles                                    | 0.1 (0.1 to 0.1)           | 0.1 (0.1 to 0.1)           | 0.1 (0.0 to 0.1)           | 0.1 (0.1 to 0.1)           | 1.8 (1.5 to 2.1)                               | 30.3 (25.3 to 36.2)                 |
| Thailand                                      | 0.3 (0.1 to 0.5)           | 0.4 (0.3 to 0.5)           | 0.3 (0.3 to 0.5)           | 0.3 (0.2 to 0.5)           | -0.9 (-1.3 to -0.4)                            | -12.2 (-17.8 to -6.2)               |
| Timor-Leste                                   | 0.3 (0.0 to 2.1)           | 0.2 (0.0 to 1.2)           | 0.2 (0.0 to 1.2)           | 0.2 (0.0 to 1.5)           | 0.9 (-0.3 to 1.9)                              | 15.0 (-4.7 to 32.6)                 |
| Vietnam                                       | 0.2 (0.2 to 0.3)           | 0.2 (0.2 to 0.3)           | 0.2 (0.1 to 0.2)           | 0.2 (0.2 to 0.3)           | 1.0 (0.3 to 1.6)                               | 15.6 (5.1 to 27.2)                  |
| <b>Sub-Saharan Africa</b>                     |                            |                            |                            |                            |                                                |                                     |
| <b>Central Sub-Saharan Africa</b>             |                            |                            |                            |                            |                                                |                                     |
| Angola                                        | 1.2 (0.9 to 1.6)           | 1.0 (0.5 to 1.5)           | 0.8 (0.3 to 1.4)           | 0.7 (0.3 to 1.2)           | -2.2 (-4.9 to -0.8)                            | -27.2 (-51.8 to -11.2)              |
| Central African Republic                      | 5.3 (3.7 to 7.2)           | 1.2 (0.4 to 2.2)           | 1.1 (0.2 to 2.5)           | 1.1 (0.2 to 2.4)           | -1.1 (-4.2 to 1.2)                             | -13.5 (-46.4 to 19.4)               |
| Congo                                         | 2.1 (1.5 to 2.9)           | 1.5 (1.1 to 2.0)           | 1.4 (1.0 to 1.9)           | 1.3 (0.9 to 1.7)           | -1.2 (-1.7 to -0.7)                            | -16.9 (-22.5 to -10.3)              |
| Democratic Republic of the Congo              | 1.4 (1.1 to 1.8)           | 0.2 (0.1 to 0.4)           | 0.2 (0.0 to 0.4)           | 0.2 (0.0 to 0.4)           | -0.5 (-2.5 to 0.8)                             | -6.0 (-31.1 to 13.0)                |
| Equatorial Guinea                             | 3.3 (2.3 to 4.5)           | 2.7 (1.1 to 5.1)           | 1.8 (0.4 to 3.2)           | 1.5 (0.3 to 3.6)           | -4.3 (-9.4 to -1.9)                            | -45.5 (-75.4 to -24.9)              |
| Gabon                                         | 5.1 (3.6 to 7.3)           | 0.7 (0.4 to 1.1)           | 0.4 (0.2 to 0.8)           | 0.4 (0.2 to 0.7)           | -4.0 (-5.4 to -2.4)                            | -44.9 (-55.3 to -30.1)              |
| <b>Eastern Sub-Saharan Africa</b>             |                            |                            |                            |                            |                                                |                                     |
| Burundi                                       | 2.3 (1.1 to 3.5)           | 0.3 (0.1 to 0.7)           | 0.3 (0.1 to 0.8)           | 0.3 (0.1 to 0.7)           | -1.1 (-3.0 to 0.5)                             | -14.1 (-36.4 to 7.5)                |
| Comoros                                       | 0.0 (0.0 to 0.0)           | 0.0 (0.0 to 0.1)           | 0.0 (0.0 to 0.1)           | 0.0 (0.0 to 0.1)           | 2.5 (1.2 to 3.7)                               | 45.2 (19.3 to 75.3)                 |
| Dibouti                                       | 3.1 (2.1 to 4.1)           | 0.7 (0.3 to 1.3)           | 0.7 (0.2 to 1.5)           | 0.7 (0.2 to 1.4)           | -0.7 (-3.3 to 0.9)                             | -8.2 (-39.2 to 14.1)                |
| Eritrea                                       | 1.4 (0.8 to 2.0)           | 0.3 (0.1 to 0.6)           | 0.3 (0.1 to 0.6)           | 0.3 (0.1 to 0.6)           | -0.7 (-3.7 to 0.8)                             | -9.0 (-43.0 to 12.8)                |
| Ethiopia                                      | 1.2 (0.7 to 1.8)           | 0.2 (0.1 to 0.3)           | 0.1 (0.1 to 0.2)           | 0.1 (0.1 to 0.4)           | 0.8 (-0.3 to 1.9)                              | 13.3 (-3.9 to 32.0)                 |
| Kenya                                         | 4.7 (3.6 to 6.0)           | 2.2 (1.6 to 3.2)           | 2.0 (1.4 to 2.9)           | 2.6 (1.8 to 3.5)           | 0.9 (0.3 to 1.5)                               | 14.8 (4.2 to 24.6)                  |
| Madagascar                                    | 0.4 (0.3 to 0.6)           | 0.2 (0.0 to 0.6)           | 0.4 (0.0 to 1.8)           | 0.4 (0.1 to 1.9)           | 5.5 (1.2 to 10.4)                              | 141.1 (19.5 to 379.2)               |
| Malawi                                        | 9.4 (7.0 to 12.1)          | 2.2 (1.4 to 3.2)           | 1.6 (0.7 to 2.6)           | 1.6 (0.7 to 2.5)           | -2.7 (-4.7 to -1.3)                            | -32.3 (-50.9 to -17.5)              |
| Mozambique                                    | 8.6 (7.2 to 10.4)          | 6.2 (4.6 to 8.2)           | 4.7 (3.1 to 6.8)           | 3.8 (2.4 to 5.4)           | -3.3 (-4.7 to -2.4)                            | -38.8 (-50.4 to -29.9)              |
| Rwanda                                        | 2.5 (1.6 to 3.4)           | 0.7 (0.5 to 1.0)           | 0.5 (0.3 to 0.8)           | 0.5 (0.3 to 0.8)           | -1.8 (-3.1 to -0.7)                            | -23.9 (-36.8 to -9.5)               |
| Somalia                                       | 0.6 (0.1 to 2.2)           | 0.2 (0.0 to 0.7)           | 0.1 (0.0 to 0.6)           | 0.2 (0.0 to 0.8)           | 0.3 (-4.1 to 2.6)                              | 8.7 (-46.1 to 48.2)                 |
| South Sudan                                   | 1.5 (0.1 to 4.9)           | 0.7 (0.0 to 2.2)           | 0.4 (0.0 to 1.8)           | 0.4 (0.0 to 1.6)           | -3.5 (-6.3 to -2.0)                            | -40.0 (-60.9 to -25.5)              |
| Tanzania                                      | 4.7 (2.7 to 6.5)           | 1.2 (0.2 to 2.7)           | 1.0 (0.0 to 3.4)           | 0.9 (0.0 to 2.9)           | -5.7 (-31.8 to 0.6)                            | -38.3 (-69.2 to 11.8)               |
| Uganda                                        | 3.6 (2.6 to 4.7)           | 1.8 (0.7 to 3.9)           | 1.1 (0.1 to 4.0)           | 1.2 (0.2 to 4.1)           | -3.5 (-9.9 to 0.6)                             | -38.0 (-77.4 to 8.8)                |
| Zambia                                        | 8.8 (6.8 to 11.0)          | 3.5 (2.6 to 4.6)           | 2.7 (1.8 to 4.0)           | 2.3 (1.4 to 3.4)           | -3.0 (-4.2 to -1.8)                            | -35.8 (-47.0 to -23.2)              |
| <b>Southern Sub-Saharan Africa</b>            |                            |                            |                            |                            |                                                |                                     |
| Botswana                                      | 14.8 (12.2 to 18.2)        | 6.0 (4.5 to 7.8)           | 3.6 (2.6 to 5.0)           | 3.4 (2.4 to 4.6)           | -3.9 (-5.2 to -2.7)                            | -43.8 (-54.3 to -33.2)              |
| Lesotho                                       | 16.2 (13.7 to 19.3)        | 6.9 (7.6 to 11.9)          | 6.2 (4.5 to 8.2)           | 5.7 (4.0 to 7.7)           | -3.5 (-4.6 to -2.5)                            | -40.6 (-50.1 to -31.5)              |
| Namibia                                       | 13.0 (10.8 to 15.4)        | 4.5 (3.0 to 6.5)           | 3.9 (2.3 to 6.4)           | 2.7 (1.7 to 4.1)           | -3.6 (-4.8 to -2.4)                            | -41.2 (-51.1 to -30.4)              |
| South Africa                                  | 14.3 (12.8 to 16.5)        | 5.8 (4.7 to 7.1)           | 4.6 (3.5 to 5.8)           | 4.8 (3.5 to 6.2)           | -1.3 (-2.3 to -0.4)                            | -17.6 (-28.9 to -6.3)               |
| Swaziland                                     | 17.5 (13.9 to 21.9)        | 4.5 (2.8 to 6.7)           | 2.0 (0.5 to 3.7)           | 1.8 (0.2 to 3.5)           | -7.3 (-16.6 to -3.9)                           | -63.2 (-91.7 to -43.9)              |

|                                                                                              | Estimate in 2000 (95% UIs) | Estimate in 2015 (95% UIs) | Estimate in 2017 (95% UIs) | Estimate in 2020 (95% UIs) | Annualised rate of change, 2015-2020 (95% UIs) | Percent change, 2015-2020 (95% UIs) |
|----------------------------------------------------------------------------------------------|----------------------------|----------------------------|----------------------------|----------------------------|------------------------------------------------|-------------------------------------|
| Zimbabwe                                                                                     | 12.0 (6.9 to 16.4)         | 4.0 (0.7 to 7.8)           | 4.0 (0.1 to 9.0)           | 4.1 (0.1 to 8.8)           | -1.1 (-13.3 to 1.6)                            | -6.9 (-86.4 to 27.4)                |
| <b>Western Sub-Saharan Africa</b>                                                            |                            |                            |                            |                            |                                                |                                     |
| Benin                                                                                        | 0.9 (0.5 to 1.3)           | 0.4 (0.3 to 0.6)           | 0.3 (0.2 to 0.5)           | 0.3 (0.2 to 0.5)           | -2.1 (-3.7 to -1.0)                            | -26.1 (-42.8 to -14.2)              |
| Burkina Faso                                                                                 | 0.8 (0.4 to 1.1)           | 0.2 (0.1 to 0.3)           | 0.2 (0.0 to 0.3)           | 0.1 (0.0 to 0.3)           | -2.7 (-9.3 to -0.3)                            | -29.3 (-75.1 to -4.1)               |
| Cameroon                                                                                     | 4.9 (4.2 to 5.9)           | 1.4 (0.7 to 2.0)           | 1.1 (0.3 to 1.9)           | 1.0 (0.3 to 1.7)           | -2.2 (-5.6 to -0.7)                            | -27.2 (-57.0 to -10.6)              |
| Cape Verde                                                                                   | 0.8 (0.6 to 1.1)           | 0.6 (0.4 to 0.8)           | 0.6 (0.4 to 0.8)           | 0.6 (0.4 to 0.8)           | 0.0 (-0.4 to 0.5)                              | 0.3 (-5.9 to 7.1)                   |
| Chad                                                                                         | 1.8 (1.1 to 2.6)           | 0.7 (0.3 to 1.0)           | 0.7 (0.2 to 1.1)           | 0.6 (0.2 to 1.1)           | -0.6 (-2.6 to 1.0)                             | -6.9 (-32.7 to 15.7)                |
| Cote d'Ivoire                                                                                | 2.6 (1.4 to 3.7)           | 1.7 (0.6 to 2.7)           | 1.9 (0.3 to 3.3)           | 1.6 (0.3 to 3.0)           | -1.0 (-4.5 to 1.2)                             | -11.5 (-49.4 to 20.0)               |
| The Gambia                                                                                   | 1.6 (1.2 to 2.2)           | 0.7 (0.3 to 1.2)           | 0.6 (0.2 to 1.1)           | 0.6 (0.2 to 1.0)           | -2.1 (-5.0 to -0.7)                            | -26.1 (-52.8 to -9.4)               |
| Ghana                                                                                        | 1.7 (1.3 to 2.1)           | 0.8 (0.5 to 1.1)           | 0.8 (0.4 to 1.3)           | 0.7 (0.4 to 1.2)           | -0.5 (-1.7 to 0.6)                             | -6.3 (-22.3 to 9.9)                 |
| Guinea                                                                                       | 1.4 (1.1 to 1.7)           | 0.6 (0.4 to 0.9)           | 0.5 (0.3 to 0.9)           | 0.5 (0.3 to 0.8)           | -2.0 (-3.3 to -0.8)                            | -26.1 (-39.3 to -11.4)              |
| Guinea-Bissau                                                                                | 2.8 (2.0 to 3.8)           | 1.4 (0.6 to 2.4)           | 1.3 (0.4 to 2.5)           | 1.2 (0.4 to 2.2)           | -1.6 (-3.9 to -0.3)                            | -20.5 (-44.6 to -4.5)               |
| Liberia                                                                                      | 1.8 (1.0 to 2.5)           | 0.5 (0.3 to 0.9)           | 0.5 (0.2 to 0.9)           | 0.5 (0.2 to 0.9)           | -0.5 (-1.9 to 0.7)                             | -6.6 (-25.1 to 11.1)                |
| Mali                                                                                         | 1.2 (0.8 to 1.5)           | 0.5 (0.4 to 0.7)           | 0.4 (0.3 to 0.6)           | 0.4 (0.2 to 0.5)           | -2.6 (-3.2 to -2.0)                            | -31.9 (-37.8 to -26.3)              |
| Mauritania                                                                                   | 0.0 (0.0 to 0.1)           | 0.0 (0.0 to 0.1)           | 0.0 (0.0 to 0.1)           | 0.0 (0.1 to 2.8)           | 1.4 (0.1 to 2.8)                               | 23.6 (1.1 to 52.6)                  |
| Niger                                                                                        | 0.9 (0.7 to 1.1)           | 0.1 (0.1 to 0.2)           | 0.1 (0.1 to 0.2)           | 0.1 (0.1 to 0.2)           | -0.8 (-1.4 to -0.1)                            | -10.6 (-18.4 to -1.8)               |
| Nigeria                                                                                      | 3.0 (2.3 to 3.7)           | 1.4 (1.1 to 1.9)           | 1.2 (0.8 to 1.6)           | 1.0 (0.7 to 1.5)           | -2.5 (-3.1 to -1.9)                            | -31.6 (-37.6 to -25.3)              |
| Sao Tome and Principe                                                                        | 0.0 (0.0 to 0.0)           | 0.0 (0.0 to 0.0)           | 0.0 (0.0 to 0.0)           | 0.0 (0.0 to 0.0)           | 1.5 (0.4 to 2.7)                               | 26.2 (5.6 to 50.9)                  |
| Senegal                                                                                      | 0.7 (0.5 to 0.9)           | 0.2 (0.1 to 0.3)           | 0.2 (0.1 to 0.3)           | 0.2 (0.2 to 0.5)           | 2.2 (1.4 to 3.2)                               | 38.9 (24.0 to 61.2)                 |
| Sierra Leone                                                                                 | 1.2 (0.9 to 1.6)           | 0.4 (0.1 to 0.8)           | 0.4 (0.1 to 0.9)           | 0.4 (0.0 to 0.8)           | -1.2 (-5.8 to 1.0)                             | -13.7 (-57.8 to 15.9)               |
| Togo                                                                                         | 3.8 (2.8 to 5.0)           | 0.6 (0.2 to 1.1)           | 0.5 (0.1 to 1.1)           | 0.5 (0.1 to 1.0)           | -1.8 (-6.4 to 1.6)                             | -21.9 (-61.4 to 1.6)                |
| <b>Indicator 3.3.2: Age-standardised rate of tuberculosis cases (per 100,000 population)</b> |                            |                            |                            |                            |                                                |                                     |
| <b>Central Europe, Eastern Europe, and Central Asia</b>                                      |                            |                            |                            |                            |                                                |                                     |
| <b>Central Asia</b>                                                                          |                            |                            |                            |                            |                                                |                                     |
| Armenia                                                                                      | 44.8 (40.4 to 49.4)        | 37.7 (34.4 to 41.0)        | 33.6 (30.7 to 36.5)        | 28.1 (21.7 to 36.7)        | -2.0 (-3.5 to -0.3)                            | -25.6 (-40.6 to -4.8)               |
| Azerbaijan                                                                                   | 148.5 (134.2 to 164.0)     | 106.0 (95.0 to 118.3)      | 104.1 (92.7 to 116.7)      | 95.0 (71.4 to 124.6)       | -0.8 (-2.4 to 0.9)                             | -10.4 (-30.1 to 14.6)               |
| Georgia                                                                                      | 79.0 (71.1 to 87.0)        | 77.6 (71.0 to 84.5)        | 69.6 (63.9 to 75.5)        | 59.7 (47.5 to 74.3)        | -1.8 (-3.2 to -0.4)                            | -23.1 (-38.3 to -5.5)               |
| Kazakhstan                                                                                   | 159.9 (145.0 to 176.0)     | 89.9 (82.0 to 98.2)        | 74.7 (68.4 to 81.0)        | 80.2 (54.7 to 114.9)       | -0.9 (-3.2 to 1.4)                             | -10.7 (-38.6 to 22.5)               |
| Kyrgyzstan                                                                                   | 134.4 (122.3 to 148.4)     | 110.2 (101.3 to 119.7)     | 114.0 (105.0 to 123.5)     | 97.4 (75.3 to 124.3)       | -0.9 (-2.5 to 0.7)                             | -11.6 (-31.5 to 10.3)               |
| Mongolia                                                                                     | 179.7 (163.9 to 197.8)     | 153.2 (138.9 to 168.3)     | 150.3 (135.7 to 165.1)     | 140.9 (108.2 to 186.6)     | -0.6 (-2.2 to 1.1)                             | -8.1 (-27.9 to 18.0)                |
| Tajikistan                                                                                   | 135.7 (122.4 to 149.2)     | 110.7 (99.8 to 121.7)      | 107.7 (97.3 to 118.9)      | 79.5 (64.9 to 98.7)        | -2.2 (-3.4 to -1.0)                            | -28.1 (-40.3 to -14.3)              |
| Turkmenistan                                                                                 | 99.2 (89.5 to 110.3)       | 76.4 (68.2 to 85.2)        | 78.9 (69.5 to 89.5)        | 60.1 (45.5 to 80.1)        | -1.6 (-3.2 to 0.1)                             | -21.3 (-37.8 to 0.8)                |
| Uzbekistan                                                                                   | 85.0 (77.2 to 93.3)        | 64.7 (59.8 to 70.2)        | 62.5 (57.8 to 68.1)        | 45.3 (37.0 to 55.9)        | -2.4 (-3.7 to -1.1)                            | -30.0 (-42.4 to -14.7)              |
| <b>Central Europe</b>                                                                        |                            |                            |                            |                            |                                                |                                     |
| Albania                                                                                      | 17.3 (15.6 to 19.1)        | 14.1 (12.8 to 15.7)        | 14.3 (10.4 to 16.0)        | 13.5 (10.4 to 17.0)        | -0.3 (-1.9 to 1.2)                             | -4.3 (-24.7 to 19.1)                |
| Bosnia and Herzegovina                                                                       | 37.8 (34.5 to 41.5)        | 29.1 (26.4 to 32.1)        | 28.3 (25.5 to 31.4)        | 21.9 (18.0 to 27.4)        | -1.9 (-3.1 to -0.6)                            | -24.7 (-37.3 to -7.9)               |
| Bulgaria                                                                                     | 30.3 (27.4 to 33.4)        | 20.6 (18.9 to 22.2)        | 19.1 (17.6 to 20.5)        | 11.5 (8.1 to 18.0)         | -4.0 (-6.1 to -1.8)                            | -44.3 (-59.7 to -23.7)              |
| Croatia                                                                                      | 19.1 (17.1 to 21.6)        | 10.8 (9.8 to 11.9)         | 10.0 (9.1 to 11.0)         | 6.3 (4.7 to 8.4)           | -3.7 (-5.5 to -1.8)                            | -41.8 (-56.3 to -24.0)              |
| Czech Republic                                                                               | 9.4 (8.5 to 10.4)          | 5.5 (5.0 to 5.8)           | 5.2 (4.7 to 5.8)           | 3.2 (2.5 to 4.1)           | -3.7 (-5.0 to -2.1)                            | -42.2 (-52.9 to -27.6)              |
| Hungary                                                                                      | 17.6 (16.1 to 19.4)        | 8.8 (8.0 to 9.6)           | 7.6 (6.9 to 8.3)           | 4.8 (3.7 to 6.6)           | -4.1 (-5.8 to -2.0)                            | -45.2 (-57.8 to -25.5)              |
| Macedonia                                                                                    | 39.5 (35.8 to 43.5)        | 23.2 (21.0 to 25.5)        | 23.1 (20.9 to 25.5)        | 19.2 (14.3 to 24.5)        | -1.3 (-3.1 to 0.2)                             | -17.2 (-37.0 to 3.1)                |
| Montenegro                                                                                   | 17.7 (15.8 to 19.6)        | 14.1 (12.8 to 15.6)        | 13.9 (12.6 to 15.4)        | 10.3 (7.6 to 14.0)         | -2.2 (-4.0 to -0.1)                            | -27.1 (-45.4 to -2.1)               |
| Poland                                                                                       | 19.3 (17.3 to 21.2)        | 12.4 (11.3 to 13.5)        | 11.9 (10.9 to 12.9)        | 6.5 (5.2 to 8.3)           | -4.3 (-5.6 to -2.8)                            | -47.2 (-57.0 to -34.2)              |
| Romania                                                                                      | 88.1 (80.0 to 95.6)        | 62.2 (57.3 to 67.1)        | 59.1 (54.4 to 63.6)        | 30.0 (21.4 to 43.4)        | -5.0 (-7.1 to -2.5)                            | -51.8 (-65.7 to -31.0)              |
| Serbia                                                                                       | 31.0 (28.0 to 34.2)        | 22.8 (20.7 to 25.1)        | 21.8 (19.7 to 24.1)        | 20.2 (14.9 to 27.2)        | -0.9 (-2.7 to 1.1)                             | -11.3 (-33.0 to 17.8)               |
| Slovakia                                                                                     | 14.0 (12.6 to 15.5)        | 9.5 (8.6 to 10.5)          | 9.2 (8.3 to 10.2)          | 5.9 (4.5 to 7.8)           | -3.3 (-4.9 to -1.3)                            | -38.2 (-52.2 to -17.8)              |
| Slovenia                                                                                     | 11.7 (10.5 to 13.0)        | 7.0 (6.2 to 7.8)           | 6.4 (5.7 to 7.2)           | 3.7 (2.7 to 4.8)           | -4.4 (-6.1 to -2.6)                            | -47.9 (-59.9 to -32.6)              |
| <b>Eastern Europe</b>                                                                        |                            |                            |                            |                            |                                                |                                     |
| Belarus                                                                                      | 51.0 (44.6 to 57.7)        | 38.7 (35.3 to 42.3)        | 33.1 (30.2 to 36.1)        | 24.4 (19.2 to 30.7)        | -3.1 (-4.5 to -1.7)                            | -36.9 (-49.1 to -22.7)              |
| Estonia                                                                                      | 41.2 (36.9 to 45.8)        | 20.7 (18.6 to 22.9)        | 18.8 (16.9 to 20.7)        | 15.7 (11.4 to 21.8)        | -1.9 (-3.9 to 0.3)                             | -24.2 (-44.1 to 4.5)                |
| Latvia                                                                                       | 62.6 (57.0 to 68.7)        | 34.0 (31.1 to 36.9)        | 32.1 (29.4 to 34.7)        | 27.5 (20.8 to 37.0)        | -1.5 (-3.2 to 0.5)                             | -19.3 (-37.8 to 7.8)                |
| Lithuania                                                                                    | 61.3 (55.1 to 67.8)        | 44.9 (40.9 to 49.1)        | 42.5 (38.5 to 46.4)        | 24.8 (17.6 to 34.6)        | -4.0 (-6.1 to -1.8)                            | -44.7 (-60.1 to -23.9)              |
| Moldova                                                                                      | 74.2 (66.7 to 82.1)        | 81.8 (74.3 to 89.6)        | 76.0 (69.3 to 83.0)        | 60.4 (46.3 to 79.1)        | -2.1 (-3.8 to -0.3)                            | -26.2 (-43.1 to -3.9)               |
| Russia                                                                                       | 95.2 (84.3 to 108.1)       | 80.0 (70.8 to 89.9)        | 67.9 (61.1 to 75.3)        | 47.5 (34.9 to 64.2)        | -3.6 (-5.4 to -1.5)                            | -40.6 (-55.7 to -19.8)              |
| Ukraine                                                                                      | 67.2 (59.1 to 76.5)        | 64.5 (56.6 to 73.7)        | 62.0 (54.1 to 71.5)        | 61.3 (49.7 to 77.5)        | -0.4 (-1.6 to 1.0)                             | -5.1 (-21.6 to 15.5)                |
| <b>High-income</b>                                                                           |                            |                            |                            |                            |                                                |                                     |
| <b>Australasia</b>                                                                           |                            |                            |                            |                            |                                                |                                     |
| Australia                                                                                    | 5.0 (4.5 to 5.6)           | 5.1 (4.6 to 5.6)           | 4.9 (4.5 to 5.4)           | 3.1 (2.6 to 3.7)           | -3.3 (-4.4 to -2.2)                            | -39.1 (-48.1 to -28.6)              |
| New Zealand                                                                                  | 11.0 (10.1 to 11.8)        | 10.2 (9.3 to 11.3)         | 10.8 (9.7 to 12.0)         | 6.8 (5.8 to 8.3)           | -2.7 (-3.8 to -1.5)                            | -33.4 (-43.2 to -20.4)              |
| <b>High-income Asia Pacific</b>                                                              |                            |                            |                            |                            |                                                |                                     |
| Brunei                                                                                       | 152.4 (138.9 to 167.1)     | 107.2 (97.7 to 117.3)      | 104.3 (94.5 to 114.5)      | 70.6 (55.8 to 99.0)        | -2.9 (-4.2 to -0.5)                            | -34.2 (-46.7 to -7.2)               |
| Japan                                                                                        | 15.8 (14.0 to 18.0)        | 8.2 (7.5 to 9.0)           | 8.0 (7.3 to 8.8)           | 5.7 (4.5 to 7.3)           | -2.5 (-3.8 to -0.9)                            | -30.5 (-43.7 to -12.4)              |
| South Korea                                                                                  | 64.8 (59.4 to 70.8)        | 56.3 (51.7 to 61.0)        | 51.9 (47.7 to 56.1)        | 34.9 (28.9 to 42.0)        | -3.2 (-4.4 to -2.1)                            | -37.9 (-48.0 to -26.9)              |
| Singapore                                                                                    | 36.2 (32.7 to 40.3)        | 32.5 (29.4 to 35.7)        | 35.5 (32.3 to 39.0)        | 26.7 (22.4 to 31.2)        | -1.3 (-2.3 to -0.4)                            | -17.8 (-29.3 to -6.4)               |
| <b>High-income North America</b>                                                             |                            |                            |                            |                            |                                                |                                     |
| Canada                                                                                       | 5.4 (4.9 to 5.9)           | 4.4 (4.0 to 4.7)           | 4.4 (4.0 to 4.7)           | 3.7 (3.1 to 4.2)           | -1.1 (-2.3 to -0.3)                            | -14.3 (-29.4 to -4.1)               |
| Greenland                                                                                    | 73.8 (67.8 to 80.4)        | 59.2 (54.6 to 64.0)        | 55.7 (51.4 to 60.3)        | 44.8 (36.5 to 56.3)        | -1.9 (-3.1 to -0.4)                            | -24.3 (-37.2 to -5.2)               |
| United States                                                                                | 5.7 (5.2 to 6.3)           | 2.7 (2.2 to 3.0)           | 2.5 (2.2 to 2.9)           | 1.9 (1.6 to 2.3)           | -2.3 (-3.4 to -1.5)                            | -29.0 (-39.6 to -20.4)              |
| <b>Southern Latin America</b>                                                                |                            |                            |                            |                            |                                                |                                     |
| Argentina                                                                                    | 30.2 (27.6 to 33.1)        | 21.1 (19.5 to 22.9)        | 22.1 (20.5 to 23.8)        | 20.3 (17.6 to 23.4)        | -0.3 (-1.0 to 0.5)                             | -4.2 (-14.3 to 8.5)                 |
| Chile                                                                                        | 21.4 (19.7 to 23.2)        | 14.7 (13.7 to 16.0)        | 14.0 (12.9 to 15.1)        | 12.1 (10.6 to 13.9)        | -1.3 (-2.1 to -0.6)                            | -17.7 (-26.9 to -8.4)               |
| Uruguay                                                                                      | 19.7 (17.9 to 21.6)        | 19.8 (18.1 to 21.6)        | 20.9 (19.1 to 22.7)        | 18.4 (16.1 to 20.8)        | -0.5 (-1.2 to 0.2)                             | -7.3 (-16.1 to 2.7)                 |
| <b>Western Europe</b>                                                                        |                            |                            |                            |                            |                                                |                                     |
| Andorra                                                                                      | 9.8 (8.7 to 11.1)          | 7.3 (6.5 to 8.2)           | 7.2 (6.4 to 8.1)           | 5.2 (4.2 to 6.4)           | -2.2 (-3.5 to -0.9)                            | -27.7 (-41.1 to -12.5)              |
| Austria                                                                                      | 10.8 (9.7 to 12.1)         | 7.5 (6.7 to 8.3)           | 7.4 (6.7 to 8.3)           | 4.9 (4.0 to 6.0)           | -2.9 (-4.1 to -1.6)                            | -34.8 (-45.9 to -21.2)              |
| Belgium                                                                                      | 10.2 (9.2 to 11.4)         | 8.6 (7.8 to 9.4)           | 8.4 (7.7 to 9.2)           | 6.0 (4.8 to 7.4)           | -2.4 (-3.7 to -1.1)                            | -30.2 (-42.9 to -14.6)              |
| Cyprus                                                                                       | 9.2 (8.2 to 10.4)          | 6.7 (5.9 to 7.6)           | 6.7 (5.9 to 7.6)           | 4.5 (3.5 to 5.9)           | -2.6 (-4.2 to -1.0)                            | -32.3 (-46.6 to -13.8)              |
| Denmark                                                                                      | 9.1 (8.1 to 10.2)          | 6.4 (5.7 to 7.2)           | 6.2 (5.6 to 7.0)           | 4.2 (3.3 to 5.3)           | -2.9 (-4.2 to -1.5)                            | -34.6 (-47.1 to -19.7)              |
| Finland                                                                                      | 7.7 (6.9 to 8.6)           | 5.7 (5.0 to 6.3)           | 5.4 (4.8 to 6.0)           | 3.2 (2.3 to 4.4)           | -3.8 (-5.8 to -1.8)                            | -43.0 (-58.0 to -24.1)              |
| France                                                                                       | 10.9 (9.9 to 12.0)         | 7.2 (6.6 to 8.0)           | 7.1 (6.5 to 7.8)           | 4.5 (3.6 to 5.6)           | -3.2 (-4.6 to -1.8)                            | -38.2 (-49.7 to -23.9)              |

|                                     | Estimate in 2000 (95% UIs) | Estimate in 2015 (95% UIs) | Estimate in 2017 (95% UIs) | Estimate in 2020 (95% UIs) | Annualised rate of change, 2015-2020 (95% UIs) | Percent change, 2015-2020 (95% UIs) |
|-------------------------------------|----------------------------|----------------------------|----------------------------|----------------------------|------------------------------------------------|-------------------------------------|
| Germany                             | 8.2 (7.2 to 9.5)           | 6.1 (5.2 to 6.7)           | 7.0 (6.3 to 7.7)           | 4.5 (3.6 to 5.6)           | -2.0 (-3.2 to -0.7)                            | -25.6 (-38.1 to -10.5)              |
| Greece                              | 6.0 (4.4 to 6.7)           | 5.0 (4.5 to 5.6)           | 4.7 (4.2 to 5.2)           | 2.9 (2.3 to 3.6)           | -3.7 (-5.0 to -2.3)                            | -42.0 (-52.5 to -29.0)              |
| Iceland                             | 6.8 (6.0 to 7.8)           | 5.8 (5.1 to 6.6)           | 5.5 (4.8 to 6.3)           | 4.1 (2.9 to 5.7)           | -2.4 (-4.3 to -0.1)                            | -29.5 (-47.4 to -1.9)               |
| Ireland                             | 9.1 (8.2 to 10.2)          | 7.2 (6.4 to 8.0)           | 6.7 (6.0 to 7.4)           | 4.6 (3.7 to 5.7)           | -5.0 (-4.1 to -1.6)                            | -35.6 (-46.3 to -21.7)              |
| Israel                              | 7.0 (6.3 to 7.8)           | 4.3 (3.9 to 4.9)           | 4.1 (3.6 to 4.6)           | 3.3 (2.6 to 4.1)           | -1.9 (-3.2 to -0.5)                            | -24.4 (-38.3 to -6.6)               |
| Italy                               | 7.2 (6.3 to 8.3)           | 6.9 (6.0 to 7.9)           | 6.3 (5.5 to 7.2)           | 4.2 (3.4 to 5.2)           | -3.4 (-4.5 to -2.1)                            | -39.3 (-49.4 to -27.1)              |
| Luxembourg                          | 7.4 (6.4 to 8.5)           | 6.2 (5.5 to 7.1)           | 6.2 (5.4 to 7.0)           | 4.9 (3.4 to 7.0)           | -1.8 (-3.9 to 0.6)                             | -22.0 (-44.3 to 9.7)                |
| Malta                               | 7.8 (6.8 to 8.8)           | 8.0 (7.0 to 9.1)           | 8.2 (7.2 to 9.4)           | 5.1 (3.9 to 6.9)           | -3.0 (-4.7 to -1.2)                            | -36.0 (-50.5 to -16.6)              |
| Netherlands                         | 8.4 (7.6 to 9.3)           | 5.8 (5.2 to 6.5)           | 5.5 (5.0 to 6.1)           | 3.8 (3.1 to 4.6)           | -2.9 (-4.0 to -1.6)                            | -35.4 (-45.4 to -21.8)              |
| Norway                              | 6.6 (5.8 to 7.4)           | 7.0 (6.1 to 8.1)           | 6.6 (5.8 to 7.6)           | 4.7 (3.6 to 6.1)           | -2.8 (-4.3 to -1.1)                            | -33.4 (-47.5 to -15.4)              |
| Portugal                            | 34.5 (31.0 to 38.3)        | 17.5 (15.9 to 19.2)        | 16.2 (14.7 to 17.7)        | 11.4 (9.2 to 14.1)         | -2.9 (-4.1 to -1.5)                            | -35.0 (-46.2 to -19.9)              |
| Spain                               | 14.8 (11.9 to 18.0)        | 9.6 (7.7 to 11.5)          | 8.7 (7.0 to 10.6)          | 5.4 (4.0 to 7.5)           | -3.8 (-5.3 to -2.1)                            | -43.4 (-54.8 to -27.2)              |
| Sweden                              | 6.1 (5.3 to 6.9)           | 7.8 (6.7 to 9.1)           | 8.0 (6.8 to 9.4)           | 5.2 (4.0 to 6.9)           | -2.8 (-4.2 to -1.1)                            | -33.8 (-46.4 to -15.0)              |
| Switzerland                         | 7.8 (7.0 to 8.8)           | 6.7 (6.0 to 7.5)           | 6.8 (6.1 to 7.6)           | 4.7 (3.6 to 6.1)           | -2.5 (-4.1 to -0.8)                            | -30.6 (-45.7 to -10.9)              |
| United Kingdom                      | 15.6 (13.7 to 17.9)        | 15.2 (13.3 to 17.3)        | 13.6 (12.0 to 15.5)        | 7.5 (5.9 to 9.5)           | -4.8 (-6.0 to -3.4)                            | -50.9 (-59.4 to -40.2)              |
| <b>Latin America and Caribbean</b>  |                            |                            |                            |                            |                                                |                                     |
| <b>Andean Latin America</b>         |                            |                            |                            |                            |                                                |                                     |
| Bolivia                             | 138.3 (126.7 to 151.3)     | 90.7 (83.1 to 99.6)        | 88.3 (80.5 to 97.2)        | 67.7 (54.6 to 86.5)        | -2.0 (-3.2 to -0.5)                            | -25.3 (-38.3 to -6.7)               |
| Ecuador                             | 58.2 (52.3 to 65.1)        | 34.8 (32.1 to 37.6)        | 33.8 (31.0 to 36.5)        | 30.0 (21.0 to 34.5)        | -1.0 (-1.8 to -0.3)                            | -13.9 (-23.2 to -3.7)               |
| Peru                                | 136.2 (124.6 to 149.1)     | 87.0 (79.6 to 95.1)        | 85.5 (77.7 to 93.8)        | 62.9 (49.6 to 81.1)        | -2.2 (-3.7 to -0.7)                            | -27.8 (-42.5 to -9.5)               |
| <b>Caribbean</b>                    |                            |                            |                            |                            |                                                |                                     |
| Antigua and Barbuda                 | 17.8 (15.9 to 19.8)        | 16.6 (14.7 to 18.8)        | 16.6 (14.6 to 18.8)        | 17.1 (13.3 to 22.9)        | 0.1 (1.3 to 2.1)                               | 2.8 (-17.8 to 36.4)                 |
| The Bahamas                         | 26.3 (23.7 to 29.1)        | 19.2 (17.4 to 21.2)        | 19.5 (17.6 to 21.5)        | 16.7 (13.6 to 20.9)        | -1.0 (-2.2 to 0.4)                             | -13.4 (-27.6 to 5.6)                |
| Barbados                            | 7.9 (7.0 to 9.0)           | 6.8 (5.9 to 7.8)           | 6.7 (5.8 to 7.7)           | 6.0 (4.8 to 7.3)           | -0.9 (-1.9 to 0.2)                             | -12.1 (-25.0 to 3.5)                |
| Belize                              | 54.5 (49.4 to 60.0)        | 39.4 (35.9 to 43.1)        | 36.7 (33.4 to 40.3)        | 30.9 (26.1 to 36.9)        | -1.6 (-2.6 to -0.5)                            | -21.5 (-32.2 to -7.3)               |
| Bermuda                             | 22.3 (19.7 to 25.3)        | 21.0 (18.6 to 23.9)        | 20.7 (18.3 to 23.6)        | 21.9 (17.7 to 27.6)        | 0.3 (-0.8 to 1.6)                              | 4.4 (-11.4 to 26.3)                 |
| Cuba                                | 9.2 (8.3 to 10.1)          | 6.4 (5.8 to 7.1)           | 5.9 (5.3 to 6.5)           | 7.4 (6.3 to 8.5)           | 1.0 (0.1 to 1.7)                               | 15.7 (1.3 to 29.0)                  |
| Dominica                            | 41.9 (37.5 to 46.3)        | 32.6 (29.4 to 36.0)        | 31.9 (28.8 to 35.3)        | 24.0 (19.2 to 30.6)        | -2.1 (-3.4 to -0.6)                            | -26.4 (-39.5 to -8.2)               |
| Dominican Republic                  | 78.3 (71.4 to 85.8)        | 58.7 (53.6 to 64.5)        | 58.4 (53.0 to 64.1)        | 53.3 (44.9 to 63.7)        | -0.7 (-1.6 to 0.4)                             | -9.2 (-21.6 to 6.4)                 |
| Grenada                             | 13.6 (12.2 to 15.4)        | 11.5 (10.3 to 13.1)        | 11.6 (10.3 to 13.1)        | 9.3 (7.9 to 11.0)          | -1.5 (-2.2 to -0.7)                            | -19.5 (-28.5 to -10.2)              |
| Guyana                              | 68.0 (62.0 to 74.4)        | 66.8 (61.4 to 72.5)        | 64.2 (59.0 to 69.6)        | 51.8 (42.9 to 64.0)        | -1.7 (-2.8 to -0.5)                            | -22.5 (-34.6 to -6.7)               |
| Haiti                               | 125.0 (114.5 to 136.5)     | 88.1 (80.6 to 97.0)        | 84.6 (77.2 to 93.3)        | 61.9 (53.0 to 72.5)        | -2.4 (-3.2 to -1.5)                            | -29.8 (-38.0 to -20.0)              |
| Jamaica                             | 19.6 (17.5 to 21.8)        | 16.4 (14.6 to 18.5)        | 16.6 (14.7 to 18.6)        | 16.8 (14.3 to 19.7)        | 0.1 (-0.6 to 0.9)                              | 2.2 (-8.9 to 13.6)                  |
| Puerto Rico                         | 6.7 (6.0 to 7.4)           | 4.0 (3.5 to 4.5)           | 3.6 (3.2 to 4.0)           | 3.2 (2.6 to 3.8)           | -1.6 (-2.6 to -0.4)                            | -20.6 (-32.3 to -5.8)               |
| Saint Lucia                         | 20.3 (18.2 to 22.6)        | 15.0 (13.2 to 16.5)        | 14.9 (13.2 to 16.5)        | 11.5 (9.6 to 13.9)         | -1.8 (-2.7 to -0.7)                            | -23.2 (-33.7 to -10.3)              |
| Saint Vincent and the Grenadines    | 28.7 (25.8 to 31.9)        | 21.8 (19.5 to 24.3)        | 21.5 (19.2 to 24.0)        | 19.7 (16.8 to 23.3)        | -0.7 (-1.4 to 0.2)                             | -9.3 (-19.5 to 3.4)                 |
| Suriname                            | 26.5 (23.6 to 29.6)        | 20.7 (18.1 to 23.1)        | 20.3 (18.1 to 22.7)        | 21.0 (17.9 to 24.2)        | 0.1 (-0.6 to 0.8)                              | 1.6 (-8.8 to 13.2)                  |
| Trinidad and Tobago                 | 19.1 (17.3 to 20.9)        | 15.5 (14.1 to 16.9)        | 15.0 (13.7 to 16.5)        | 13.4 (11.6 to 15.5)        | -1.0 (-1.8 to -0.2)                            | -13.1 (-23.3 to -2.3)               |
| Virgin Islands, U.S.                | 16.0 (14.3 to 17.9)        | 14.7 (13.1 to 16.3)        | 14.5 (12.9 to 16.3)        | 11.0 (8.8 to 13.9)         | -1.9 (-3.2 to -0.6)                            | -24.7 (-38.1 to -8.3)               |
| <b>Central Latin America</b>        |                            |                            |                            |                            |                                                |                                     |
| Colombia                            | 27.8 (25.4 to 30.6)        | 21.6 (19.7 to 23.7)        | 21.9 (20.0 to 24.0)        | 17.7 (15.1 to 20.3)        | -1.3 (-2.2 to -0.6)                            | -18.0 (-27.7 to -8.0)               |
| Costa Rica                          | 15.6 (14.1 to 17.2)        | 9.8 (8.8 to 10.8)          | 9.2 (8.3 to 10.1)          | 8.1 (6.9 to 9.4)           | -1.3 (-2.0 to -0.5)                            | -17.5 (-26.1 to -7.0)               |
| El Salvador                         | 32.8 (29.8 to 36.2)        | 26.8 (24.2 to 29.7)        | 28.9 (26.0 to 32.1)        | 24.1 (21.2 to 28.3)        | -0.7 (-1.3 to 0.0)                             | -9.9 (-18.1 to 0.7)                 |
| Guatemala                           | 33.8 (30.7 to 37.1)        | 23.9 (21.9 to 26.1)        | 23.4 (21.5 to 25.4)        | 21.2 (18.3 to 24.5)        | -0.8 (-1.6 to 0.0)                             | -11.2 (-21.3 to 0.3)                |
| Honduras                            | 69.0 (62.6 to 76.6)        | 41.7 (37.9 to 46.2)        | 41.1 (37.3 to 45.5)        | 30.8 (26.6 to 35.8)        | -2.0 (-2.7 to -1.3)                            | -26.2 (-33.2 to -18.0)              |
| Mexico                              | 21.9 (19.6 to 24.5)        | 17.0 (15.4 to 19.0)        | 17.1 (15.3 to 19.3)        | 16.0 (13.5 to 19.3)        | -0.4 (-1.2 to 0.6)                             | -6.0 (-16.3 to 6.6)                 |
| Nicaragua                           | 60.8 (55.0 to 67.3)        | 36.3 (32.9 to 40.1)        | 35.9 (32.4 to 39.7)        | 28.9 (24.5 to 34.2)        | -1.5 (-2.4 to -0.7)                            | -20.3 (-30.3 to -9.7)               |
| Panama                              | 43.2 (39.2 to 47.7)        | 40.7 (36.8 to 44.6)        | 40.6 (36.7 to 44.5)        | 35.2 (29.0 to 42.8)        | -1.0 (-2.0 to 0.3)                             | -13.5 (-26.3 to 4.3)                |
| Venezuela                           | 25.6 (23.0 to 28.6)        | 22.4 (20.4 to 24.4)        | 23.4 (21.4 to 25.4)        | 22.1 (18.4 to 26.8)        | -0.1 (-1.2 to 1.1)                             | -1.4 (-16.4 to 18.2)                |
| <b>Tropical Latin America</b>       |                            |                            |                            |                            |                                                |                                     |
| Brazil                              | 45.0 (40.2 to 50.5)        | 35.8 (32.4 to 39.7)        | 35.7 (31.9 to 40.0)        | 30.6 (25.2 to 36.6)        | -1.1 (-2.1 to -0.1)                            | -14.4 (-27.0 to -1.2)               |
| Paraguay                            | 59.5 (53.2 to 66.1)        | 52.0 (46.8 to 58.1)        | 50.7 (45.4 to 56.7)        | 44.7 (35.4 to 55.0)        | -1.0 (-2.4 to 0.3)                             | -14.1 (-30.1 to 3.9)                |
| <b>North Africa and Middle East</b> |                            |                            |                            |                            |                                                |                                     |
| <b>North Africa and Middle East</b> |                            |                            |                            |                            |                                                |                                     |
| Afghanistan                         | 186.3 (160.3 to 216.8)     | 160.1 (140.8 to 182.5)     | 151.1 (129.6 to 177.5)     | 89.8 (69.1 to 114.4)       | -3.9 (-5.2 to -2.6)                            | -43.9 (-54.4 to -32.2)              |
| Algeria                             | 51.1 (44.0 to 59.8)        | 38.6 (33.2 to 44.9)        | 37.2 (32.1 to 43.3)        | 28.2 (23.6 to 33.9)        | -2.1 (-2.8 to -1.4)                            | -27.0 (-34.7 to -18.9)              |
| Bahrain                             | 37.1 (33.9 to 40.5)        | 22.9 (21.0 to 25.3)        | 22.5 (20.5 to 24.8)        | 19.9 (16.1 to 24.8)        | -1.0 (-2.1 to 0.2)                             | -13.4 (-27.4 to 2.8)                |
| Egypt                               | 22.4 (19.2 to 25.7)        | 20.3 (17.5 to 23.4)        | 19.7 (16.9 to 22.8)        | 19.0 (15.0 to 23.4)        | -0.5 (-1.6 to 0.6)                             | -6.5 (-21.2 to 9.7)                 |
| Iran                                | 16.5 (15.1 to 18.1)        | 15.8 (14.4 to 17.4)        | 15.8 (14.3 to 17.3)        | 14.8 (12.5 to 17.3)        | -0.5 (-1.4 to 0.4)                             | -6.7 (-18.4 to 6.6)                 |
| Iraq                                | 81.3 (74.4 to 88.8)        | 44.3 (40.7 to 48.0)        | 40.8 (37.4 to 44.2)        | 29.2 (24.1 to 35.3)        | -2.8 (-4.0 to -1.7)                            | -34.1 (-44.9 to -23.0)              |
| Jordan                              | 16.6 (13.8 to 19.8)        | 10.9 (9.3 to 13.0)         | 10.8 (9.2 to 13.0)         | 9.1 (7.2 to 11.6)          | -1.2 (-2.3 to -0.1)                            | -16.7 (-29.6 to -0.9)               |
| Kuwait                              | 31.2 (28.6 to 34.0)        | 22.4 (20.6 to 24.4)        | 19.9 (18.3 to 21.6)        | 17.3 (11.7 to 27.3)        | -1.9 (-4.2 to 1.1)                             | -22.7 (-47.1 to 18.4)               |
| Lebanon                             | 26.1 (23.3 to 29.1)        | 20.1 (17.8 to 22.6)        | 19.5 (17.3 to 21.9)        | 18.7 (15.0 to 23.4)        | -0.5 (-1.7 to 0.8)                             | -6.7 (-22.4 to 12.9)                |
| Libya                               | 31.5 (28.8 to 34.5)        | 28.3 (25.7 to 31.0)        | 28.5 (25.9 to 31.2)        | 41.4 (35.0 to 48.3)        | 2.5 (1.7 to 3.4)                               | 46.5 (28.4 to 65.7)                 |
| Morocco                             | 207.9 (192.1 to 224.7)     | 151.3 (139.4 to 164.4)     | 145.0 (133.1 to 157.5)     | 156.9 (137.7 to 177.2)     | 0.2 (-0.4 to 0.8)                              | 3.6 (-5.7 to 13.0)                  |
| Palestine                           | 19.9 (18.1 to 21.9)        | 15.2 (13.9 to 16.7)        | 14.7 (13.3 to 16.1)        | 14.4 (14.8 to 22.3)        | 1.2 (0.1 to 2.4)                               | 21.1 (0.8 to 44.4)                  |
| Oman                                | 26.5 (24.1 to 29.0)        | 21.6 (19.6 to 23.8)        | 20.9 (19.0 to 23.1)        | 21.5 (17.0 to 26.1)        | -0.1 (-1.4 to 1.2)                             | -0.4 (-19.2 to 18.9)                |
| Qatar                               | 45.9 (42.0 to 50.4)        | 30.8 (27.8 to 34.0)        | 30.5 (27.6 to 33.7)        | 29.3 (22.3 to 39.3)        | -0.4 (-2.0 to 1.5)                             | -5.0 (-25.8 to 24.6)                |
| Saudi Arabia                        | 58.8 (53.9 to 63.6)        | 44.6 (40.9 to 48.7)        | 42.4 (38.8 to 46.4)        | 22.7 (17.8 to 28.2)        | -4.5 (-6.0 to -3.2)                            | -49.2 (-59.2 to -38.2)              |
| Sudan                               | 127.2 (115.5 to 139.4)     | 101.8 (91.9 to 112.4)      | 99.3 (89.2 to 110.1)       | 63.7 (53.7 to 75.8)        | -3.1 (-4.0 to -2.2)                            | -37.5 (-45.3 to -28.3)              |
| Syria                               | 29.2 (26.5 to 32.1)        | 22.2 (20.1 to 24.6)        | 22.0 (19.9 to 24.4)        | 18.2 (15.2 to 22.0)        | -1.3 (-2.3 to -0.3)                            | -18.0 (-29.6 to -3.7)               |
| Tunisia                             | 32.0 (29.2 to 35.0)        | 27.4 (24.9 to 30.0)        | 27.2 (24.7 to 29.9)        | 22.5 (19.5 to 26.1)        | -1.3 (-2.1 to -0.6)                            | -17.8 (-27.0 to -8.7)               |
| Turkey                              | 50.4 (45.1 to 56.3)        | 28.4 (25.3 to 31.9)        | 27.9 (24.5 to 31.5)        | 23.8 (17.5 to 31.8)        | -1.2 (-2.9 to 0.5)                             | -16.2 (-25.2 to -8.3)               |
| United Arab Emirates                | 21.6 (19.4 to 23.9)        | 18.4 (16.6 to 20.5)        | 18.1 (16.4 to 20.1)        | 14.6 (11.6 to 18.5)        | -1.6 (-2.9 to -0.1)                            | -20.7 (-35.6 to -2.0)               |
| Yemen                               | 81.5 (74.7 to 89.0)        | 62.6 (57.6 to 68.1)        | 61.6 (56.6 to 67.2)        | 40.4 (33.5 to 49.6)        | -3.0 (-4.0 to -1.7)                            | -35.6 (-44.7 to -23.0)              |
| <b>South Asia</b>                   |                            |                            |                            |                            |                                                |                                     |
| <b>South Asia</b>                   |                            |                            |                            |                            |                                                |                                     |
| Bangladesh                          | 183.4 (166.4 to 202.4)     | 127.5 (116.1 to 139.8)     | 131.0 (118.8 to 144.5)     | 135.4 (111.3 to 165.7)     | 0.4 (-0.7 to 1.5)                              | 6.2 (-9.4 to 25.4)                  |
| Bhutan                              | 173.2 (155.7 to 192.4)     | 118.3 (106.0 to 132.5)     | 115.7 (103.2 to 130.1)     | 101.1 (85.7 to 119.1)      | -1.1 (-1.8 to -0.3)                            | -14.5 (-23.6 to -4.2)               |
| India                               | 292.7 (268.2 to 319.4)     | 234.8 (215.4 to 256.5)     | 221.4 (202.9 to 242.0)     | 189.0 (162.7 to 218.0)     | -1.5 (-2.3 to -0.7)                            | -19.5 (-28.7 to -9.7)               |



|                                               | Estimate in 2000 (95% UIs) | Estimate in 2015 (95% UIs) | Estimate in 2017 (95% UIs) | Estimate in 2030 (95% UIs) | Annualised rate of change, 2015-2030 (95% UIs) | Percent change, 2015-2030 (95% UIs) |
|-----------------------------------------------|----------------------------|----------------------------|----------------------------|----------------------------|------------------------------------------------|-------------------------------------|
| Nepal                                         | 251.3 (228.3 to 278.1)     | 181.6 (164.0 to 201.2)     | 176.4 (158.7 to 196.0)     | 117.9 (100.0 to 137.7)     | -2.9 (-3.7 to -2.1)                            | -35.1 (-42.3 to -27.3)              |
| Pakistan                                      | 253.0 (232.5 to 276.4)     | 197.2 (180.8 to 213.7)     | 191.6 (175.3 to 208.5)     | 148.7 (127.6 to 173.4)     | -1.9 (-2.7 to -1.1)                            | -24.6 (-33.2 to -15.0)              |
| <b>Southeast Asia, East Asia, and Oceania</b> |                            |                            |                            |                            |                                                |                                     |
| <b>East Asia</b>                              |                            |                            |                            |                            |                                                |                                     |
| China                                         | 124.0 (113.4 to 135.1)     | 58.2 (53.1 to 63.5)        | 55.8 (50.8 to 60.9)        | 34.1 (27.1 to 43.1)        | -3.6 (-5.0 to -2.1)                            | -41.4 (-52.8 to -27.1)              |
| North Korea                                   | 166.1 (151.0 to 182.2)     | 169.0 (153.8 to 186.0)     | 171.3 (155.2 to 189.0)     | 139.9 (121.8 to 162.8)     | -1.3 (-2.0 to -0.6)                            | -17.2 (-25.4 to -8.0)               |
| Taiwan (Province of China)                    | 54.5 (50.3 to 58.8)        | 39.0 (36.5 to 41.6)        | 38.4 (35.4 to 41.6)        | 24.6 (20.0 to 30.7)        | -3.1 (-4.3 to -1.7)                            | -36.8 (-47.6 to -22.9)              |
| <b>Oceania</b>                                |                            |                            |                            |                            |                                                |                                     |
| American Samoa                                | 20.7 (18.7 to 22.9)        | 17.0 (15.4 to 18.7)        | 16.5 (14.9 to 18.2)        | 17.2 (14.8 to 20.1)        | 0.1 (-0.6 to 0.8)                              | 1.4 (-8.9 to 13.5)                  |
| Federated States of Micronesia                | 152.9 (139.6 to 167.2)     | 125.4 (114.2 to 137.4)     | 125.4 (114.2 to 136.4)     | 596.7 (151.6 to 1481.1)    | 9.2 (1.2 to 16.2)                              | 375.4 (19.3 to 1042.5)              |
| Fiji                                          | 44.2 (40.6 to 48.5)        | 38.0 (34.7 to 41.8)        | 38.1 (34.7 to 42.0)        | 39.9 (32.9 to 50.5)        | 0.3 (-0.8 to 1.7)                              | 5.0 (-1.3 to 28.7)                  |
| Guam                                          | 56.0 (50.9 to 61.3)        | 47.2 (43.0 to 51.7)        | 46.4 (42.1 to 51.0)        | 30.4 (23.4 to 39.3)        | -3.0 (-4.5 to -1.5)                            | -35.7 (-49.1 to -19.6)              |
| Kiribati                                      | 300.9 (273.5 to 328.6)     | 283.5 (258.4 to 311.3)     | 292.5 (266.2 to 321.5)     | 240.3 (195.9 to 292.4)     | -1.1 (-2.3 to 0.1)                             | -15.2 (-28.9 to 1.7)                |
| Marshall Islands                              | 233.7 (212.4 to 259.3)     | 195.4 (177.6 to 214.5)     | 191.4 (173.8 to 210.1)     | 146.2 (118.7 to 195.4)     | -2.0 (-3.2 to -0.2)                            | -25.2 (-37.9 to -2.6)               |
| Northern Mariana Islands                      | 76.3 (69.3 to 84.1)        | 53.2 (48.4 to 57.7)        | 52.3 (47.5 to 57.7)        | 45.5 (38.5 to 53.8)        | -1.1 (-2.0 to -0.2)                            | -14.4 (-25.8 to -2.4)               |
| Papua New Guinea                              | 191.9 (174.5 to 209.4)     | 176.9 (161.4 to 193.7)     | 179.8 (163.3 to 197.6)     | 169.8 (138.7 to 218.9)     | -0.3 (-1.4 to 1.2)                             | -4.0 (-18.9 to 19.9)                |
| Samoa                                         | 52.9 (48.2 to 57.9)        | 42.1 (38.5 to 46.0)        | 41.7 (37.9 to 45.7)        | 44.2 (36.9 to 59.8)        | 0.3 (-0.9 to 2.2)                              | 5.1 (-12.5 to 38.5)                 |
| Solomon Islands                               | 102.1 (93.3 to 111.1)      | 87.3 (80.0 to 95.3)        | 84.2 (77.0 to 92.0)        | 78.9 (64.8 to 98.6)        | -0.7 (-1.8 to 0.6)                             | -9.6 (-23.8 to 9.6)                 |
| Tonga                                         | 43.4 (39.8 to 47.4)        | 36.3 (33.2 to 39.8)        | 35.5 (32.2 to 39.1)        | 52.0 (40.9 to 77.1)        | 2.3 (0.9 to 4.9)                               | 43.3 (13.7 to 109.1)                |
| Vanuatu                                       | 95.1 (87.0 to 103.6)       | 76.1 (69.5 to 83.1)        | 75.3 (68.6 to 82.1)        | 55.4 (45.6 to 81.0)        | -2.2 (-3.3 to 0.3)                             | -27.3 (-39.3 to 4.3)                |
| <b>Southeast Asia</b>                         |                            |                            |                            |                            |                                                |                                     |
| Cambodia                                      | 398.3 (361.9 to 438.8)     | 278.3 (252.9 to 304.7)     | 267.9 (243.0 to 294.8)     | 196.0 (162.4 to 239.4)     | -2.4 (-3.4 to -1.2)                            | -29.6 (-39.6 to -16.8)              |
| Indonesia                                     | 276.1 (253.2 to 301.2)     | 235.9 (215.7 to 257.7)     | 226.5 (206.7 to 247.6)     | 230.7 (198.9 to 269.2)     | -0.2 (-0.9 to 0.6)                             | -2.2 (-13.2 to 9.7)                 |
| Laos                                          | 224.8 (197.2 to 254.9)     | 167.8 (147.3 to 190.5)     | 158.8 (138.1 to 182.0)     | 119.0 (95.4 to 146.5)      | -2.3 (-3.4 to -1.2)                            | -29.1 (-39.8 to -16.9)              |
| Malaysia                                      | 72.5 (66.5 to 79.1)        | 60.4 (55.3 to 66.1)        | 61.2 (55.8 to 67.3)        | 48.6 (39.0 to 60.5)        | -1.5 (-2.8 to -0.0)                            | -19.5 (-34.7 to -0.0)               |
| Maldives                                      | 60.5 (55.5 to 66.0)        | 40.7 (37.0 to 44.6)        | 41.5 (37.7 to 45.7)        | 34.9 (25.4 to 48.2)        | -1.1 (-3.0 to 0.9)                             | -14.4 (-36.5 to 13.6)               |
| Mauritius                                     | 21.1 (19.0 to 23.4)        | 19.1 (17.4 to 21.2)        | 18.3 (16.6 to 20.2)        | 15.3 (12.8 to 17.8)        | -1.5 (-2.5 to -0.5)                            | -20.3 (-30.8 to -7.9)               |
| Myanmar                                       | 317.4 (291.2 to 347.3)     | 222.2 (203.9 to 241.6)     | 209.1 (191.3 to 228.2)     | 206.4 (172.2 to 248.4)     | -0.5 (-1.5 to 0.5)                             | -7.1 (-20.5 to 7.2)                 |
| Philippines                                   | 216.7 (194.7 to 240.7)     | 223.0 (201.1 to 245.9)     | 253.7 (229.3 to 279.1)     | 271.5 (228.5 to 321.9)     | 1.3 (0.3 to 2.3)                               | 21.8 (4.8 to 40.4)                  |
| Sri Lanka                                     | 56.0 (48.3 to 64.7)        | 44.1 (38.4 to 50.6)        | 43.9 (37.9 to 50.6)        | 47.7 (35.9 to 62.6)        | 0.5 (-1.0 to 2.1)                              | 8.2 (-14.3 to 36.2)                 |
| Seychelles                                    | 29.8 (27.0 to 32.8)        | 24.6 (22.3 to 27.1)        | 24.7 (22.4 to 27.2)        | 24.6 (19.7 to 30.4)        | 0.0 (-1.2 to 1.3)                              | 0.2 (-16.5 to 21.0)                 |
| Thailand                                      | 114.6 (104.8 to 125.0)     | 72.5 (66.0 to 79.3)        | 71.2 (64.7 to 78.0)        | 62.0 (49.4 to 79.1)        | -1.1 (-2.4 to 0.4)                             | -14.4 (-29.9 to 6.4)                |
| Timor-Leste                                   | 172.3 (158.8 to 188.0)     | 164.7 (150.3 to 180.4)     | 186.6 (169.6 to 204.7)     | 163.8 (133.5 to 201.1)     | -0.1 (-1.3 to 1.1)                             | -0.6 (-17.3 to 17.8)                |
| Vietnam                                       | 150.3 (131.0 to 171.7)     | 133.8 (117.0 to 151.3)     | 130.8 (114.3 to 148.5)     | 137.1 (108.2 to 176.7)     | 0.1 (-1.1 to 1.6)                              | 2.4 (-14.9 to 27.8)                 |
| <b>Sub-Saharan Africa</b>                     |                            |                            |                            |                            |                                                |                                     |
| <b>Central Sub-Saharan Africa</b>             |                            |                            |                            |                            |                                                |                                     |
| Angola                                        | 598.9 (547.1 to 655.9)     | 483.1 (439.5 to 532.3)     | 465.1 (421.6 to 516.4)     | 330.8 (271.2 to 405.6)     | -2.6 (-3.7 to -1.3)                            | -31.5 (-42.9 to -17.8)              |
| Central African Republic                      | 1183.9 (1086.5 to 1295.2)  | 953.8 (873.2 to 1039.1)    | 904.4 (826.5 to 987.4)     | 599.3 (494.8 to 734.8)     | -3.1 (-4.2 to -2.0)                            | -37.2 (-46.7 to -25.6)              |
| Congo                                         | 680.5 (616.5 to 747.8)     | 472.6 (430.4 to 517.1)     | 458.9 (416.6 to 505.4)     | 363.1 (305.8 to 439.4)     | -1.8 (-2.7 to -0.6)                            | -23.2 (-32.9 to -8.1)               |
| Democratic Republic of the Congo              | 764.5 (697.8 to 837.6)     | 637.8 (581.9 to 693.5)     | 605.5 (549.8 to 661.7)     | 423.9 (342.4 to 524.0)     | -2.8 (-4.0 to -1.5)                            | -33.5 (-45.0 to -19.8)              |
| Equatorial Guinea                             | 595.1 (544.6 to 652.5)     | 439.6 (399.4 to 484.3)     | 428.8 (383.4 to 475.2)     | 449.3 (383.6 to 532.1)     | 0.1 (-0.8 to 1.1)                              | 2.2 (-10.6 to 17.6)                 |
| Gabon                                         | 553.0 (503.8 to 604.6)     | 391.6 (357.1 to 429.8)     | 373.3 (336.9 to 411.3)     | 496.7 (436.6 to 573.6)     | 1.6 (0.9 to 2.3)                               | 26.8 (13.6 to 41.9)                 |
| <b>Eastern Sub-Saharan Africa</b>             |                            |                            |                            |                            |                                                |                                     |
| Burundi                                       | 1025.9 (946.6 to 1110.5)   | 792.0 (728.3 to 863.8)     | 762.8 (701.2 to 831.7)     | 603.6 (472.9 to 771.5)     | -1.9 (-3.3 to -0.2)                            | -23.8 (-38.7 to -3.4)               |
| Comoros                                       | 276.2 (252.6 to 302.1)     | 253.3 (230.7 to 278.5)     | 252.7 (228.3 to 280.5)     | 178.3 (149.1 to 216.3)     | -2.4 (-3.3 to -1.3)                            | -29.6 (-39.3 to -17.1)              |
| Djibouti                                      | 488.0 (437.2 to 542.4)     | 407.4 (365.2 to 454.5)     | 392.8 (351.1 to 439.4)     | 252.8 (200.3 to 312.9)     | -3.2 (-4.5 to -2.1)                            | -38.0 (-49.4 to -26.6)              |
| Eritrea                                       | 641.3 (586.8 to 702.0)     | 612.9 (560.5 to 669.1)     | 595.0 (542.9 to 651.7)     | 714.0 (551.3 to 902.2)     | 1.0 (-0.6 to 2.4)                              | 16.5 (-8.2 to 44.0)                 |
| Ethiopia                                      | 893.1 (814.3 to 976.2)     | 302.0 (276.0 to 329.8)     | 279.7 (256.0 to 305.9)     | 245.2 (200.5 to 298.4)     | -1.4 (-2.5 to -0.3)                            | -18.8 (-31.0 to -3.8)               |
| Kenya                                         | 442.5 (403.6 to 484.2)     | 456.0 (415.0 to 500.6)     | 429.5 (390.9 to 471.7)     | 353.4 (304.1 to 416.2)     | -1.7 (-2.5 to -0.8)                            | -22.5 (-31.0 to -10.8)              |
| Madagascar                                    | 258.8 (215.3 to 305.5)     | 221.1 (183.7 to 264.4)     | 217.7 (180.2 to 259.8)     | 208.4 (164.2 to 261.4)     | -0.4 (-1.3 to 0.6)                             | -5.7 (-18.1 to 8.7)                 |
| Malawi                                        | 850.3 (771.6 to 932.3)     | 658.6 (599.8 to 721.3)     | 602.2 (547.7 to 659.3)     | 476.4 (416.6 to 546.0)     | -2.2 (-3.2 to -1.4)                            | -27.7 (-34.4 to -19.4)              |
| Mozambique                                    | 800.2 (733.9 to 869.9)     | 910.4 (833.5 to 988.9)     | 850.5 (775.9 to 923.9)     | 616.0 (528.3 to 721.0)     | -2.6 (-3.4 to -1.8)                            | -32.3 (-40.2 to -23.4)              |
| Rwanda                                        | 824.6 (759.1 to 895.0)     | 439.0 (405.6 to 475.9)     | 417.3 (384.0 to 454.5)     | 416.6 (294.8 to 644.9)     | -0.5 (-2.7 to 2.4)                             | -5.1 (-33.2 to 44.0)                |
| Somalia                                       | 432.2 (371.1 to 501.1)     | 405.1 (351.0 to 464.6)     | 396.3 (342.9 to 455.9)     | 235.9 (191.8 to 286.6)     | -3.6 (-4.6 to -2.7)                            | -41.8 (-49.9 to -33.2)              |
| South Sudan                                   | 391.7 (359.5 to 425.3)     | 407.5 (376.2 to 441.4)     | 400.0 (368.4 to 433.5)     | 257.3 (214.8 to 313.1)     | -3.1 (-4.1 to -1.8)                            | -36.8 (-46.1 to -23.8)              |
| Tanzania                                      | 594.0 (537.8 to 652.6)     | 478.7 (436.5 to 524.5)     | 454.0 (412.4 to 500.6)     | 416.6 (359.5 to 485.8)     | -0.9 (-1.7 to -0.1)                            | -13.0 (-22.5 to -1.9)               |
| Uganda                                        | 948.9 (849.5 to 1062.6)    | 647.6 (586.5 to 719.6)     | 601.4 (542.4 to 669.5)     | 399.8 (334.9 to 487.0)     | -3.2 (-4.3 to -2.1)                            | -38.3 (-47.3 to -27.2)              |
| Zambia                                        | 1060.9 (951.6 to 1178.2)   | 791.9 (713.6 to 878.0)     | 739.2 (665.2 to 821.0)     | 520.3 (454.3 to 600.0)     | -2.8 (-3.5 to -2.1)                            | -34.3 (-40.6 to -26.6)              |
| <b>Southern Sub-Saharan Africa</b>            |                            |                            |                            |                            |                                                |                                     |
| Botswana                                      | 981.5 (857.6 to 1120.8)    | 740.5 (649.2 to 849.7)     | 684.2 (597.0 to 794.1)     | 561.8 (440.0 to 775.8)     | -1.9 (-3.2 to 0.1)                             | -24.1 (-37.8 to -10.4)              |
| Lesotho                                       | 1363.8 (1233.3 to 1499.4)  | 1421.1 (1289.9 to 1563.3)  | 1328.9 (1200.6 to 1463.3)  | 1089.3 (942.8 to 1275.2)   | -1.8 (-2.5 to -1.0)                            | -23.3 (-31.1 to -14.0)              |
| Namibia                                       | 1043.1 (947.0 to 1146.5)   | 864.2 (787.1 to 953.8)     | 824.1 (748.6 to 910.1)     | 661.8 (556.9 to 816.7)     | -1.8 (-2.8 to -0.5)                            | -23.4 (-34.0 to -6.9)               |
| South Africa                                  | 1087.9 (988.6 to 1201.2)   | 1043.9 (949.1 to 1149.8)   | 754.5 (685.0 to 830.9)     | 679.9 (512.4 to 1031.2)    | -3.0 (-4.6 to -0.2)                            | -34.9 (-49.7 to -2.7)               |
| Swaziland                                     | 1251.7 (1131.1 to 1387.1)  | 1129.8 (1026.8 to 1244.2)  | 972.4 (881.6 to 1070.3)    | 739.6 (612.3 to 915.4)     | -2.9 (-3.9 to -1.5)                            | -34.5 (-43.9 to -20.2)              |
| Zimbabwe                                      | 1586.2 (1391.8 to 1827.8)  | 1143.9 (1002.9 to 1296.1)  | 964.1 (841.0 to 1091.3)    | 908.1 (746.1 to 1146.5)    | -1.6 (-2.6 to -0.2)                            | -20.6 (-32.1 to -3.1)               |
| <b>Western Sub-Saharan Africa</b>             |                            |                            |                            |                            |                                                |                                     |
| Benin                                         | 320.1 (291.6 to 351.0)     | 244.1 (221.9 to 268.1)     | 238.4 (215.8 to 261.9)     | 161.5 (140.2 to 185.1)     | -2.8 (-3.4 to -2.1)                            | -33.8 (-39.6 to -27.1)              |
| Burkina Faso                                  | 412.0 (379.9 to 447.0)     | 332.4 (306.7 to 359.7)     | 310.8 (286.1 to 336.2)     | 180.9 (156.6 to 207.5)     | -4.1 (-4.8 to -3.3)                            | -45.6 (-51.6 to -39.2)              |
| Cameroon                                      | 395.3 (352.8 to 443.6)     | 335.1 (299.4 to 374.5)     | 314.1 (280.3 to 350.7)     | 214.3 (184.4 to 246.3)     | -3.0 (-3.6 to -2.4)                            | -36.1 (-41.8 to -29.8)              |
| Cape Verde                                    | 181.2 (166.6 to 196.7)     | 139.4 (127.7 to 151.9)     | 134.8 (123.2 to 147.3)     | 102.0 (89.9 to 115.3)      | -2.1 (-2.7 to -1.5)                            | -26.8 (-33.0 to -20.1)              |
| Chad                                          | 511.6 (473.9 to 554.0)     | 384.9 (356.7 to 415.1)     | 370.4 (343.0 to 401.0)     | 248.3 (216.4 to 281.0)     | -2.9 (-3.7 to -2.2)                            | -35.5 (-43.2 to -28.2)              |
| Cote d'Ivoire                                 | 447.5 (411.3 to 484.0)     | 328.4 (302.1 to 357.5)     | 309.9 (284.6 to 338.8)     | 217.5 (194.6 to 244.0)     | -2.8 (-3.3 to -2.2)                            | -33.8 (-38.7 to -28.2)              |
| The Gambia                                    | 377.9 (342.6 to 420.0)     | 353.6 (318.7 to 391.3)     | 348.0 (314.2 to 383.9)     | 235.2 (204.6 to 270.1)     | -2.7 (-3.3 to -2.1)                            | -33.5 (-39.3 to -26.8)              |
| Ghana                                         | 456.5 (384.4 to 545.9)     | 351.7 (298.2 to 414.7)     | 326.1 (274.5 to 388.7)     | 342.3 (276.3 to 418.6)     | -0.2 (-1.1 to 0.7)                             | -2.7 (-14.9 to 11.3)                |
| Guinea                                        | 388.0 (359.2 to 420.2)     | 365.1 (337.1 to 394.8)     | 346.4 (319.1 to 375.6)     | 199.7 (169.8 to 231.2)     | -4.0 (-4.9 to -3.2)                            | -45.3 (-52.3 to -37.7)              |
| Guinea-Bissau                                 | 328.7 (302.0 to 356.1)     | 335.7 (308.5 to 364.6)     | 316.8 (290.3 to 344.6)     | 193.2 (163.7 to 228.6)     | -3.7 (-4.5 to -2.7)                            | -42.4 (-49.1 to -33.8)              |
| Liberia                                       | 431.4 (398.7 to 467.0)     | 311.5 (287.6 to 337.9)     | 302.3 (278.4 to 329.6)     | 228.1 (186.1 to 279.9)     | -2.1 (-3.3 to -0.9)                            | -26.8 (-38.7 to -12.2)              |
| Mali                                          | 246.1 (227.6 to 265.6)     | 184.8 (170.0 to 201.0)     | 181.7 (167.4 to 198.1)     | 160.1 (141.9 to 182.4)     | -1.0 (-1.6 to -0.3)                            | -13.4 (-20.9 to -3.9)               |
| Mauritania                                    | 185.2 (169.3 to 202.8)     | 142.4 (130.5 to 156.2)     | 138.9 (127.0 to 152.3)     | 135.5 (115.0 to 163.8)     | -0.3 (-1.3 to 0.8)                             | -4.8 (-17.7 to 12.5)                |
| Niger                                         | 338.0 (312.0 to 365.0)     | 254.3 (233.4 to 276.8)     | 250.5 (230.0 to 272.5)     | 206.0 (179.6 to 234.0)     | -1.4 (-2.1 to -0.7)                            | -19.0 (-26.8 to -10.2)              |

|                                                                                       | Estimate in 2000 (95% UIs) | Estimate in 2015 (95% UIs) | Estimate in 2017 (95% UIs) | Estimate in 2030 (95% UIs) | Annualised rate of change, 2015-2030 (95% UIs) | Percent change, 2015-2030 (95% UIs) |
|---------------------------------------------------------------------------------------|----------------------------|----------------------------|----------------------------|----------------------------|------------------------------------------------|-------------------------------------|
| Nigeria                                                                               | 549.6 (504.9 to 596.3)     | 366.1 (336.5 to 396.5)     | 357.7 (323.0 to 382.1)     | 296.5 (249.2 to 334.8)     | -1.6 (-2.3 to -0.7)                            | -20.6 (-29.4 to -10.4)              |
| San Tome and Principe                                                                 | 152.9 (139.8 to 166.9)     | 124.8 (114.5 to 136.2)     | 124.0 (113.0 to 134.9)     | 72.4 (56.8 to 95.0)        | -3.6 (-5.1 to -1.9)                            | -41.7 (-53.5 to -24.6)              |
| Senegal                                                                               | 349.0 (324.3 to 376.5)     | 260.1 (240.4 to 282.4)     | 256.4 (236.4 to 278.8)     | 170.1 (149.1 to 194.6)     | -2.8 (-3.5 to -2.1)                            | -34.6 (-41.0 to -27.5)              |
| Sierra Leone                                                                          | 474.6 (438.8 to 514.5)     | 406.1 (374.0 to 439.8)     | 376.2 (345.8 to 409.1)     | 208.8 (177.4 to 246.2)     | -4.5 (-5.4 to -3.5)                            | -48.6 (-55.4 to -40.8)              |
| Togo                                                                                  | 371.0 (341.8 to 401.4)     | 308.8 (284.6 to 334.3)     | 292.0 (267.7 to 318.9)     | 184.8 (158.3 to 216.7)     | -3.4 (-4.2 to -2.6)                            | -40.2 (-47.0 to -32.3)              |
| <b>Indicator 3.3.3: Age-standardised rate of malaria cases (per 1,000 population)</b> |                            |                            |                            |                            |                                                |                                     |
| <b>Central Europe, Eastern Europe, and Central Asia</b>                               |                            |                            |                            |                            |                                                |                                     |
| <b>Central Asia</b>                                                                   |                            |                            |                            |                            |                                                |                                     |
| Armenia                                                                               | 0.1 (0.1 to 0.2)           | 0.0 (0.0 to 0.0)           | 0.0 (0.0 to 0.0)           | 0.0 (0.0 to 0.0)           | 0.0 (0.0 to 0.0)                               | 0.0 (0.0 to 0.0)                    |
| Azerbaijan                                                                            | 0.6 (0.4 to 0.8)           | 0.0 (0.0 to 0.0)           | 0.0 (0.0 to 0.0)           | 0.0 (0.0 to 0.0)           | -86.3 (-86.5 to -86.3)                         | -100.0 (-100.0 to -100.0)           |
| Georgia                                                                               | 0.2 (0.1 to 0.2)           | 0.0 (0.0 to 0.0)           | 0.0 (0.0 to 0.0)           | 0.0 (0.0 to 0.0)           | 0.0 (0.0 to 0.0)                               | 0.0 (0.0 to 0.0)                    |
| Kazakhstan                                                                            | 0.0 (0.0 to 0.0)           | 0.0 (0.0 to 0.0)           | 0.0 (0.0 to 0.0)           | 0.0 (0.0 to 0.0)           | 0.0 (0.0 to 0.0)                               | 0.0 (0.0 to 0.0)                    |
| Kyrgyzstan                                                                            | 0.0 (0.0 to 0.0)           | 0.0 (0.0 to 0.0)           | 0.0 (0.0 to 0.0)           | 0.0 (0.0 to 0.0)           | 0.0 (0.0 to 0.0)                               | 0.0 (0.0 to 0.0)                    |
| Mongolia                                                                              | 0.0 (0.0 to 0.0)           | 0.0 (0.0 to 0.0)           | 0.0 (0.0 to 0.0)           | 0.0 (0.0 to 0.0)           | 0.0 (0.0 to 0.0)                               | 0.0 (0.0 to 0.0)                    |
| Tajikistan                                                                            | 13.5 (9.9 to 18.1)         | 0.0 (0.0 to 0.0)           | 0.0 (0.0 to 0.0)           | 0.0 (0.0 to 0.0)           | -92.9 (-93.0 to -92.9)                         | -100.0 (-100.0 to -100.0)           |
| Turkmenistan                                                                          | 0.0 (0.0 to 0.0)           | 0.0 (0.0 to 0.0)           | 0.0 (0.0 to 0.0)           | 0.0 (0.0 to 0.0)           | 0.0 (0.0 to 0.0)                               | 0.0 (0.0 to 0.0)                    |
| Uzbekistan                                                                            | 0.0 (0.0 to 0.0)           | 0.0 (0.0 to 0.0)           | 0.0 (0.0 to 0.0)           | 0.0 (0.0 to 0.0)           | 0.0 (0.0 to 0.0)                               | 0.0 (0.0 to 0.0)                    |
| <b>Central Europe</b>                                                                 |                            |                            |                            |                            |                                                |                                     |
| Albania                                                                               | 0.0 (0.0 to 0.0)           | 0.0 (0.0 to 0.0)           | 0.0 (0.0 to 0.0)           | 0.0 (0.0 to 0.0)           | 0.0 (0.0 to 0.0)                               | 0.0 (0.0 to 0.0)                    |
| Bosnia and Herzegovina                                                                | 0.0 (0.0 to 0.0)           | 0.0 (0.0 to 0.0)           | 0.0 (0.0 to 0.0)           | 0.0 (0.0 to 0.0)           | 0.0 (0.0 to 0.0)                               | 0.0 (0.0 to 0.0)                    |
| Bulgaria                                                                              | 0.0 (0.0 to 0.0)           | 0.0 (0.0 to 0.0)           | 0.0 (0.0 to 0.0)           | 0.0 (0.0 to 0.0)           | 0.0 (0.0 to 0.0)                               | 0.0 (0.0 to 0.0)                    |
| Croatia                                                                               | 0.0 (0.0 to 0.0)           | 0.0 (0.0 to 0.0)           | 0.0 (0.0 to 0.0)           | 0.0 (0.0 to 0.0)           | 0.0 (0.0 to 0.0)                               | 0.0 (0.0 to 0.0)                    |
| Czech Republic                                                                        | 0.0 (0.0 to 0.0)           | 0.0 (0.0 to 0.0)           | 0.0 (0.0 to 0.0)           | 0.0 (0.0 to 0.0)           | 0.0 (0.0 to 0.0)                               | 0.0 (0.0 to 0.0)                    |
| Hungary                                                                               | 0.0 (0.0 to 0.0)           | 0.0 (0.0 to 0.0)           | 0.0 (0.0 to 0.0)           | 0.0 (0.0 to 0.0)           | 0.0 (0.0 to 0.0)                               | 0.0 (0.0 to 0.0)                    |
| Macedonia                                                                             | 0.0 (0.0 to 0.0)           | 0.0 (0.0 to 0.0)           | 0.0 (0.0 to 0.0)           | 0.0 (0.0 to 0.0)           | 0.0 (0.0 to 0.0)                               | 0.0 (0.0 to 0.0)                    |
| Montenegro                                                                            | 0.0 (0.0 to 0.0)           | 0.0 (0.0 to 0.0)           | 0.0 (0.0 to 0.0)           | 0.0 (0.0 to 0.0)           | 0.0 (0.0 to 0.0)                               | 0.0 (0.0 to 0.0)                    |
| Poland                                                                                | 0.0 (0.0 to 0.0)           | 0.0 (0.0 to 0.0)           | 0.0 (0.0 to 0.0)           | 0.0 (0.0 to 0.0)           | 0.0 (0.0 to 0.0)                               | 0.0 (0.0 to 0.0)                    |
| Romania                                                                               | 0.0 (0.0 to 0.0)           | 0.0 (0.0 to 0.0)           | 0.0 (0.0 to 0.0)           | 0.0 (0.0 to 0.0)           | 0.0 (0.0 to 0.0)                               | 0.0 (0.0 to 0.0)                    |
| Serbia                                                                                | 0.0 (0.0 to 0.0)           | 0.0 (0.0 to 0.0)           | 0.0 (0.0 to 0.0)           | 0.0 (0.0 to 0.0)           | 0.0 (0.0 to 0.0)                               | 0.0 (0.0 to 0.0)                    |
| Slovakia                                                                              | 0.0 (0.0 to 0.0)           | 0.0 (0.0 to 0.0)           | 0.0 (0.0 to 0.0)           | 0.0 (0.0 to 0.0)           | 0.0 (0.0 to 0.0)                               | 0.0 (0.0 to 0.0)                    |
| Slovenia                                                                              | 0.0 (0.0 to 0.0)           | 0.0 (0.0 to 0.0)           | 0.0 (0.0 to 0.0)           | 0.0 (0.0 to 0.0)           | 0.0 (0.0 to 0.0)                               | 0.0 (0.0 to 0.0)                    |
| <b>Eastern Europe</b>                                                                 |                            |                            |                            |                            |                                                |                                     |
| Belarus                                                                               | 0.0 (0.0 to 0.0)           | 0.0 (0.0 to 0.0)           | 0.0 (0.0 to 0.0)           | 0.0 (0.0 to 0.0)           | 0.0 (0.0 to 0.0)                               | 0.0 (0.0 to 0.0)                    |
| Estonia                                                                               | 0.0 (0.0 to 0.0)           | 0.0 (0.0 to 0.0)           | 0.0 (0.0 to 0.0)           | 0.0 (0.0 to 0.0)           | 0.0 (0.0 to 0.0)                               | 0.0 (0.0 to 0.0)                    |
| Latvia                                                                                | 0.0 (0.0 to 0.0)           | 0.0 (0.0 to 0.0)           | 0.0 (0.0 to 0.0)           | 0.0 (0.0 to 0.0)           | 0.0 (0.0 to 0.0)                               | 0.0 (0.0 to 0.0)                    |
| Lithuania                                                                             | 0.0 (0.0 to 0.0)           | 0.0 (0.0 to 0.0)           | 0.0 (0.0 to 0.0)           | 0.0 (0.0 to 0.0)           | 0.0 (0.0 to 0.0)                               | 0.0 (0.0 to 0.0)                    |
| Moldova                                                                               | 0.0 (0.0 to 0.0)           | 0.0 (0.0 to 0.0)           | 0.0 (0.0 to 0.0)           | 0.0 (0.0 to 0.0)           | 0.0 (0.0 to 0.0)                               | 0.0 (0.0 to 0.0)                    |
| Russia                                                                                | 0.0 (0.0 to 0.0)           | 0.0 (0.0 to 0.0)           | 0.0 (0.0 to 0.0)           | 0.0 (0.0 to 0.0)           | 0.0 (0.0 to 0.0)                               | 0.0 (0.0 to 0.0)                    |
| Ukraine                                                                               | 0.0 (0.0 to 0.0)           | 0.0 (0.0 to 0.0)           | 0.0 (0.0 to 0.0)           | 0.0 (0.0 to 0.0)           | 0.0 (0.0 to 0.0)                               | 0.0 (0.0 to 0.0)                    |
| <b>High-income</b>                                                                    |                            |                            |                            |                            |                                                |                                     |
| <b>Australasia</b>                                                                    |                            |                            |                            |                            |                                                |                                     |
| Australia                                                                             | 0.0 (0.0 to 0.0)           | 0.0 (0.0 to 0.0)           | 0.0 (0.0 to 0.0)           | 0.0 (0.0 to 0.0)           | 0.0 (0.0 to 0.0)                               | 0.0 (0.0 to 0.0)                    |
| New Zealand                                                                           | 0.0 (0.0 to 0.0)           | 0.0 (0.0 to 0.0)           | 0.0 (0.0 to 0.0)           | 0.0 (0.0 to 0.0)           | 0.0 (0.0 to 0.0)                               | 0.0 (0.0 to 0.0)                    |
| <b>High-income Asia Pacific</b>                                                       |                            |                            |                            |                            |                                                |                                     |
| Brunei                                                                                | 0.0 (0.0 to 0.0)           | 0.0 (0.0 to 0.0)           | 0.0 (0.0 to 0.0)           | 0.0 (0.0 to 0.0)           | 0.0 (0.0 to 0.0)                               | 0.0 (0.0 to 0.0)                    |
| Japan                                                                                 | 0.0 (0.0 to 0.0)           | 0.0 (0.0 to 0.0)           | 0.0 (0.0 to 0.0)           | 0.0 (0.0 to 0.0)           | 0.0 (0.0 to 0.0)                               | 0.0 (0.0 to 0.0)                    |
| South Korea                                                                           | 0.2 (0.2 to 0.3)           | 0.0 (0.0 to 0.0)           | 0.0 (0.0 to 0.0)           | 0.0 (0.0 to 0.0)           | -15.6 (-17.8 to -13.6)                         | -90.3 (-93.1 to -87.0)              |
| Singapore                                                                             | 0.0 (0.0 to 0.0)           | 0.0 (0.0 to 0.0)           | 0.0 (0.0 to 0.0)           | 0.0 (0.0 to 0.0)           | 0.0 (0.0 to 0.0)                               | 0.0 (0.0 to 0.0)                    |
| <b>High-income North America</b>                                                      |                            |                            |                            |                            |                                                |                                     |
| Canada                                                                                | 0.0 (0.0 to 0.0)           | 0.0 (0.0 to 0.0)           | 0.0 (0.0 to 0.0)           | 0.0 (0.0 to 0.0)           | 0.0 (0.0 to 0.0)                               | 0.0 (0.0 to 0.0)                    |
| Greenland                                                                             | 0.0 (0.0 to 0.0)           | 0.0 (0.0 to 0.0)           | 0.0 (0.0 to 0.0)           | 0.0 (0.0 to 0.0)           | 0.0 (0.0 to 0.0)                               | 0.0 (0.0 to 0.0)                    |
| United States                                                                         | 0.0 (0.0 to 0.0)           | 0.0 (0.0 to 0.0)           | 0.0 (0.0 to 0.0)           | 0.0 (0.0 to 0.0)           | 0.0 (0.0 to 0.0)                               | 0.0 (0.0 to 0.0)                    |
| <b>Southern Latin America</b>                                                         |                            |                            |                            |                            |                                                |                                     |
| Argentina                                                                             | 0.0 (0.0 to 0.0)           | 0.0 (0.0 to 0.0)           | 0.0 (0.0 to 0.0)           | 0.0 (0.0 to 0.0)           | 0.0 (0.0 to 0.0)                               | 0.0 (0.0 to 0.0)                    |
| Chile                                                                                 | 0.0 (0.0 to 0.0)           | 0.0 (0.0 to 0.0)           | 0.0 (0.0 to 0.0)           | 0.0 (0.0 to 0.0)           | 0.0 (0.0 to 0.0)                               | 0.0 (0.0 to 0.0)                    |
| Uruguay                                                                               | 0.0 (0.0 to 0.0)           | 0.0 (0.0 to 0.0)           | 0.0 (0.0 to 0.0)           | 0.0 (0.0 to 0.0)           | 0.0 (0.0 to 0.0)                               | 0.0 (0.0 to 0.0)                    |
| <b>Western Europe</b>                                                                 |                            |                            |                            |                            |                                                |                                     |
| Andorra                                                                               | 0.0 (0.0 to 0.0)           | 0.0 (0.0 to 0.0)           | 0.0 (0.0 to 0.0)           | 0.0 (0.0 to 0.0)           | 0.0 (0.0 to 0.0)                               | 0.0 (0.0 to 0.0)                    |
| Austria                                                                               | 0.0 (0.0 to 0.0)           | 0.0 (0.0 to 0.0)           | 0.0 (0.0 to 0.0)           | 0.0 (0.0 to 0.0)           | 0.0 (0.0 to 0.0)                               | 0.0 (0.0 to 0.0)                    |
| Belgium                                                                               | 0.0 (0.0 to 0.0)           | 0.0 (0.0 to 0.0)           | 0.0 (0.0 to 0.0)           | 0.0 (0.0 to 0.0)           | 0.0 (0.0 to 0.0)                               | 0.0 (0.0 to 0.0)                    |
| Cyprus                                                                                | 0.0 (0.0 to 0.0)           | 0.0 (0.0 to 0.0)           | 0.0 (0.0 to 0.0)           | 0.0 (0.0 to 0.0)           | 0.0 (0.0 to 0.0)                               | 0.0 (0.0 to 0.0)                    |
| Denmark                                                                               | 0.0 (0.0 to 0.0)           | 0.0 (0.0 to 0.0)           | 0.0 (0.0 to 0.0)           | 0.0 (0.0 to 0.0)           | 0.0 (0.0 to 0.0)                               | 0.0 (0.0 to 0.0)                    |
| Finland                                                                               | 0.0 (0.0 to 0.0)           | 0.0 (0.0 to 0.0)           | 0.0 (0.0 to 0.0)           | 0.0 (0.0 to 0.0)           | 0.0 (0.0 to 0.0)                               | 0.0 (0.0 to 0.0)                    |
| France                                                                                | 0.0 (0.0 to 0.0)           | 0.0 (0.0 to 0.0)           | 0.0 (0.0 to 0.0)           | 0.0 (0.0 to 0.0)           | 0.0 (0.0 to 0.0)                               | 0.0 (0.0 to 0.0)                    |
| Germany                                                                               | 0.0 (0.0 to 0.0)           | 0.0 (0.0 to 0.0)           | 0.0 (0.0 to 0.0)           | 0.0 (0.0 to 0.0)           | 0.0 (0.0 to 0.0)                               | 0.0 (0.0 to 0.0)                    |
| Greece                                                                                | 0.0 (0.0 to 0.0)           | 0.0 (0.0 to 0.0)           | 0.0 (0.0 to 0.0)           | 0.0 (0.0 to 0.0)           | 0.0 (0.0 to 0.0)                               | 0.0 (0.0 to 0.0)                    |
| Iceland                                                                               | 0.0 (0.0 to 0.0)           | 0.0 (0.0 to 0.0)           | 0.0 (0.0 to 0.0)           | 0.0 (0.0 to 0.0)           | 0.0 (0.0 to 0.0)                               | 0.0 (0.0 to 0.0)                    |
| Ireland                                                                               | 0.0 (0.0 to 0.0)           | 0.0 (0.0 to 0.0)           | 0.0 (0.0 to 0.0)           | 0.0 (0.0 to 0.0)           | 0.0 (0.0 to 0.0)                               | 0.0 (0.0 to 0.0)                    |
| Israel                                                                                | 0.0 (0.0 to 0.0)           | 0.0 (0.0 to 0.0)           | 0.0 (0.0 to 0.0)           | 0.0 (0.0 to 0.0)           | 0.0 (0.0 to 0.0)                               | 0.0 (0.0 to 0.0)                    |
| Italy                                                                                 | 0.0 (0.0 to 0.0)           | 0.0 (0.0 to 0.0)           | 0.0 (0.0 to 0.0)           | 0.0 (0.0 to 0.0)           | 0.0 (0.0 to 0.0)                               | 0.0 (0.0 to 0.0)                    |
| Luxembourg                                                                            | 0.0 (0.0 to 0.0)           | 0.0 (0.0 to 0.0)           | 0.0 (0.0 to 0.0)           | 0.0 (0.0 to 0.0)           | 0.0 (0.0 to 0.0)                               | 0.0 (0.0 to 0.0)                    |
| Malta                                                                                 | 0.0 (0.0 to 0.0)           | 0.0 (0.0 to 0.0)           | 0.0 (0.0 to 0.0)           | 0.0 (0.0 to 0.0)           | 0.0 (0.0 to 0.0)                               | 0.0 (0.0 to 0.0)                    |
| Netherlands                                                                           | 0.0 (0.0 to 0.0)           | 0.0 (0.0 to 0.0)           | 0.0 (0.0 to 0.0)           | 0.0 (0.0 to 0.0)           | 0.0 (0.0 to 0.0)                               | 0.0 (0.0 to 0.0)                    |
| Norway                                                                                | 0.0 (0.0 to 0.0)           | 0.0 (0.0 to 0.0)           | 0.0 (0.0 to 0.0)           | 0.0 (0.0 to 0.0)           | 0.0 (0.0 to 0.0)                               | 0.0 (0.0 to 0.0)                    |
| Portugal                                                                              | 0.0 (0.0 to 0.0)           | 0.0 (0.0 to 0.0)           | 0.0 (0.0 to 0.0)           | 0.0 (0.0 to 0.0)           | 0.0 (0.0 to 0.0)                               | 0.0 (0.0 to 0.0)                    |
| Spain                                                                                 | 0.0 (0.0 to 0.0)           | 0.0 (0.0 to 0.0)           | 0.0 (0.0 to 0.0)           | 0.0 (0.0 to 0.0)           | 0.0 (0.0 to 0.0)                               | 0.0 (0.0 to 0.0)                    |
| Sweden                                                                                | 0.0 (0.0 to 0.0)           | 0.0 (0.0 to 0.0)           | 0.0 (0.0 to 0.0)           | 0.0 (0.0 to 0.0)           | 0.0 (0.0 to 0.0)                               | 0.0 (0.0 to 0.0)                    |
| Switzerland                                                                           | 0.0 (0.0 to 0.0)           | 0.0 (0.0 to 0.0)           | 0.0 (0.0 to 0.0)           | 0.0 (0.0 to 0.0)           | 0.0 (0.0 to 0.0)                               | 0.0 (0.0 to 0.0)                    |
| United Kingdom                                                                        | 0.0 (0.0 to 0.0)           | 0.0 (0.0 to 0.0)           | 0.0 (0.0 to 0.0)           | 0.0 (0.0 to 0.0)           | 0.0 (0.0 to 0.0)                               | 0.0 (0.0 to 0.0)                    |
| <b>Latin America and Caribbean</b>                                                    |                            |                            |                            |                            |                                                |                                     |

|                                               | Estimate in 2000 (95% UIs) | Estimate in 2015 (95% UIs) | Estimate in 2017 (95% UIs) | Estimate in 2030 (95% UIs) | Annualised rate of change, 2015-2030 (95% UIs) | Percent change, 2015-2030 (95% UIs) |
|-----------------------------------------------|----------------------------|----------------------------|----------------------------|----------------------------|------------------------------------------------|-------------------------------------|
| <b>Andean Latin America</b>                   |                            |                            |                            |                            |                                                |                                     |
| Bolivia                                       | 10.5 (8.6 to 12.8)         | 1.3 (1.1 to 1.5)           | 1.0 (0.8 to 1.2)           | 0.2 (0.1 to 0.2)           | -14.4 (-16.8 to -12.1)                         | -88.2 (-92.0 to -83.6)              |
| Ecuador                                       | 31.2 (26.4 to 36.5)        | 0.2 (0.2 to 0.2)           | 0.2 (0.1 to 0.2)           | 0.0 (0.0 to 0.0)           | -20.0 (-21.3 to -18.8)                         | -95.0 (-95.9 to -94.0)              |
| Peru                                          | 6.2 (5.5 to 6.9)           | 2.4 (2.2 to 2.6)           | 3.3 (2.9 to 3.6)           | 1.8 (1.3 to 2.4)           | -2.0 (-3.9 to -0.3)                            | -25.4 (-44.3 to -5.0)               |
| <b>Caribbean</b>                              |                            |                            |                            |                            |                                                |                                     |
| Antigua and Barbuda                           | 0.0 (0.0 to 0.0)           | 0.0 (0.0 to 0.0)           | 0.0 (0.0 to 0.0)           | 0.0 (0.0 to 0.0)           | 0.0 (0.0 to 0.0)                               | 0.0 (0.0 to 0.0)                    |
| The Bahamas                                   | 0.0 (0.0 to 0.0)           | 0.0 (0.0 to 0.0)           | 0.0 (0.0 to 0.0)           | 0.0 (0.0 to 0.0)           | 0.0 (0.0 to 0.0)                               | 0.0 (0.0 to 0.0)                    |
| Barbados                                      | 0.0 (0.0 to 0.0)           | 0.0 (0.0 to 0.0)           | 0.0 (0.0 to 0.0)           | 0.0 (0.0 to 0.0)           | 0.0 (0.0 to 0.0)                               | 0.0 (0.0 to 0.0)                    |
| Belize                                        | 13.4 (10.7 to 16.6)        | 0.1 (0.1 to 0.1)           | 0.0 (0.0 to 0.0)           | 0.0 (0.0 to 0.0)           | -43.0 (-45.5 to -40.7)                         | -99.8 (-99.9 to -99.8)              |
| Bermuda                                       | 0.0 (0.0 to 0.0)           | 0.0 (0.0 to 0.0)           | 0.0 (0.0 to 0.0)           | 0.0 (0.0 to 0.0)           | 0.0 (0.0 to 0.0)                               | 0.0 (0.0 to 0.0)                    |
| Cuba                                          | 0.0 (0.0 to 0.0)           | 0.0 (0.0 to 0.0)           | 0.0 (0.0 to 0.0)           | 0.0 (0.0 to 0.0)           | 0.0 (0.0 to 0.0)                               | 0.0 (0.0 to 0.0)                    |
| Dominica                                      | 0.0 (0.0 to 0.0)           | 0.0 (0.0 to 0.0)           | 0.0 (0.0 to 0.0)           | 0.0 (0.0 to 0.0)           | 0.0 (0.0 to 0.0)                               | 0.0 (0.0 to 0.0)                    |
| Dominican Republic                            | 0.3 (0.3 to 0.4)           | 0.2 (0.2 to 0.2)           | 0.1 (0.1 to 0.1)           | 0.0 (0.0 to 0.0)           | -14.6 (-16.0 to -13.2)                         | -88.8 (-90.9 to -86.3)              |
| Grenada                                       | 0.0 (0.0 to 0.0)           | 0.0 (0.0 to 0.0)           | 0.0 (0.0 to 0.0)           | 0.0 (0.0 to 0.0)           | 0.0 (0.0 to 0.0)                               | 0.0 (0.0 to 0.0)                    |
| Guyana                                        | 68.3 (57.1 to 82.5)        | 45.9 (40.3 to 52.0)        | 44.7 (38.1 to 52.3)        | 24.6 (18.2 to 32.7)        | -4.2 (-5.5 to -2.9)                            | -46.7 (-55.9 to -35.4)              |
| Haiti                                         | 14.4 (10.1 to 19.5)        | 28.4 (22.8 to 34.7)        | 11.4 (8.2 to 15.2)         | 5.6 (3.0 to 9.6)           | -11.1 (-13.9 to -8.3)                          | -80.6 (-87.5 to -71.1)              |
| Jamaica                                       | 0.0 (0.0 to 0.0)           | 0.0 (0.0 to 0.0)           | 0.0 (0.0 to 0.0)           | 0.0 (0.0 to 0.0)           | 0.0 (0.0 to 0.0)                               | 0.0 (0.0 to 0.0)                    |
| Puerto Rico                                   | 0.0 (0.0 to 0.0)           | 0.0 (0.0 to 0.0)           | 0.0 (0.0 to 0.0)           | 0.0 (0.0 to 0.0)           | 0.0 (0.0 to 0.0)                               | 0.0 (0.0 to 0.0)                    |
| Saint Lucia                                   | 0.0 (0.0 to 0.0)           | 0.0 (0.0 to 0.0)           | 0.0 (0.0 to 0.0)           | 0.0 (0.0 to 0.0)           | 0.0 (0.0 to 0.0)                               | 0.0 (0.0 to 0.0)                    |
| Saint Vincent and the Grenadines              | 0.0 (0.0 to 0.0)           | 0.0 (0.0 to 0.0)           | 0.0 (0.0 to 0.0)           | 0.0 (0.0 to 0.0)           | 0.0 (0.0 to 0.0)                               | 0.0 (0.0 to 0.0)                    |
| Suriname                                      | 93.8 (74.7 to 113.5)       | 0.0 (0.8 to 1.0)           | 0.2 (0.2 to 0.3)           | 0.0 (0.0 to 0.0)           | -27.1 (-39.1 to -35.2)                         | -99.6 (-99.7 to -99.5)              |
| Trinidad and Tobago                           | 0.0 (0.0 to 0.0)           | 0.0 (0.0 to 0.0)           | 0.0 (0.0 to 0.0)           | 0.0 (0.0 to 0.0)           | 0.0 (0.0 to 0.0)                               | 0.0 (0.0 to 0.0)                    |
| Virgin Islands, U.S.                          | 0.0 (0.0 to 0.0)           | 0.0 (0.0 to 0.0)           | 0.0 (0.0 to 0.0)           | 0.0 (0.0 to 0.0)           | 0.0 (0.0 to 0.0)                               | 0.0 (0.0 to 0.0)                    |
| <b>Central Latin America</b>                  |                            |                            |                            |                            |                                                |                                     |
| Colombia                                      | 10.0 (8.4 to 11.9)         | 2.6 (2.3 to 2.9)           | 2.1 (1.8 to 2.4)           | 0.6 (0.5 to 0.8)           | -9.7 (-11.0 to -8.4)                           | -76.4 (-80.9 to -71.8)              |
| Costa Rica                                    | 1.1 (0.9 to 1.4)           | 0.0 (0.0 to 0.0)           | 0.0 (0.0 to 0.0)           | 0.0 (0.0 to 0.0)           | -97.8 (-98.7 to -96.7)                         | -100.0 (-100.0 to -100.0)           |
| El Salvador                                   | 0.4 (0.3 to 0.5)           | 0.0 (0.0 to 0.0)           | 0.0 (0.0 to 0.0)           | 0.0 (0.0 to 0.0)           | -23.2 (-29.7 to -17.9)                         | -96.6 (-98.8 to -93.1)              |
| Guatemala                                     | 21.8 (15.6 to 30.3)        | 0.9 (0.7 to 1.1)           | 0.8 (0.6 to 1.1)           | 0.1 (0.1 to 0.2)           | -13.8 (-16.1 to -11.5)                         | -87.2 (-91.0 to -82.3)              |
| Honduras                                      | 15.8 (12.7 to 19.4)        | 1.1 (1.0 to 1.2)           | 0.9 (0.8 to 1.0)           | 0.1 (0.1 to 0.1)           | -14.4 (-15.4 to -13.5)                         | -88.4 (-90.1 to -86.7)              |
| Mexico                                        | 0.2 (0.2 to 0.2)           | 0.0 (0.0 to 0.0)           | 0.0 (0.0 to 0.0)           | 0.0 (0.0 to 0.0)           | -19.2 (-35.9 to -4.9)                          | -89.9 (-99.5 to -52.0)              |
| Nicaragua                                     | 10.6 (9.1 to 12.2)         | 0.8 (0.7 to 0.9)           | 1.7 (1.5 to 2.0)           | 0.3 (0.2 to 0.4)           | 4.3 (-7.1 to -5.5)                             | -61.1 (-65.6 to -56.0)              |
| Panama                                        | 0.5 (0.6 to 0.9)           | 0.3 (0.2 to 0.2)           | 0.3 (0.2 to 0.3)           | 0.1 (0.1 to 0.2)           | -3.8 (-5.4 to -2.2)                            | -42.7 (-55.3 to -27.7)              |
| Venezuela                                     | 3.0 (2.5 to 3.7)           | 11.5 (10.2 to 13.0)        | 17.9 (15.2 to 20.9)        | 36.5 (29.2 to 45.3)        | 7.7 (6.8 to 8.6)                               | 215.9 (176.2 to 261.8)              |
| <b>Tropical Latin America</b>                 |                            |                            |                            |                            |                                                |                                     |
| Brazil                                        | 7.0 (3.6 to 12.6)          | 2.2 (2.1 to 2.2)           | 1.0 (0.8 to 1.2)           | 0.2 (0.1 to 0.3)           | -15.7 (-18.1 to -13.1)                         | -90.3 (-93.4 to -86.0)              |
| Paraguay                                      | 3.8 (3.0 to 4.8)           | 0.0 (0.0 to 0.0)           | 0.0 (0.0 to 0.0)           | 0.0 (0.0 to 0.0)           | -87.4 (-89.2 to -85.8)                         | -100.0 (-100.0 to -100.0)           |
| <b>North Africa and Middle East</b>           |                            |                            |                            |                            |                                                |                                     |
| <b>North Africa and Middle East</b>           |                            |                            |                            |                            |                                                |                                     |
| Afghanistan                                   | 36.1 (27.1 to 47.0)        | 14.2 (12.1 to 16.5)        | 15.4 (12.3 to 18.9)        | 7.8 (5.2 to 11.3)          | -4.1 (-5.9 to -2.3)                            | -45.1 (-58.9 to -29.3)              |
| Algeria                                       | 0.0 (0.0 to 0.0)           | 0.0 (0.0 to 0.0)           | 0.0 (0.0 to 0.0)           | 0.0 (0.0 to 0.0)           | -12.9 (-16.9 to -9.0)                          | -84.9 (-92.1 to -74.2)              |
| Bahrain                                       | 0.0 (0.0 to 0.0)           | 0.0 (0.0 to 0.0)           | 0.0 (0.0 to 0.0)           | 0.0 (0.0 to 0.0)           | 0.0 (0.0 to 0.0)                               | 0.0 (0.0 to 0.0)                    |
| Egypt                                         | 0.0 (0.0 to 0.0)           | 0.0 (0.0 to 0.0)           | 0.0 (0.0 to 0.0)           | 0.0 (0.0 to 0.0)           | 0.0 (0.0 to 0.0)                               | 0.0 (0.0 to 0.0)                    |
| Iran                                          | 0.6 (0.4 to 0.9)           | 0.0 (0.0 to 0.0)           | 0.0 (0.0 to 0.0)           | 0.0 (0.0 to 0.0)           | -39.2 (-42.9 to -34.4)                         | -99.7 (-99.8 to -99.4)              |
| Iraq                                          | 0.4 (0.2 to 0.6)           | 0.0 (0.0 to 0.0)           | 0.0 (0.0 to 0.0)           | 0.0 (0.0 to 0.0)           | 0.0 (0.0 to 0.0)                               | 0.0 (0.0 to 0.0)                    |
| Jordan                                        | 0.0 (0.0 to 0.0)           | 0.0 (0.0 to 0.0)           | 0.0 (0.0 to 0.0)           | 0.0 (0.0 to 0.0)           | 0.0 (0.0 to 0.0)                               | 0.0 (0.0 to 0.0)                    |
| Kuwait                                        | 0.0 (0.0 to 0.0)           | 0.0 (0.0 to 0.0)           | 0.0 (0.0 to 0.0)           | 0.0 (0.0 to 0.0)           | 0.0 (0.0 to 0.0)                               | 0.0 (0.0 to 0.0)                    |
| Lebanon                                       | 0.0 (0.0 to 0.0)           | 0.0 (0.0 to 0.0)           | 0.0 (0.0 to 0.0)           | 0.0 (0.0 to 0.0)           | 0.0 (0.0 to 0.0)                               | 0.0 (0.0 to 0.0)                    |
| Libya                                         | 0.0 (0.0 to 0.0)           | 0.0 (0.0 to 0.0)           | 0.0 (0.0 to 0.0)           | 0.0 (0.0 to 0.0)           | 0.0 (0.0 to 0.0)                               | 0.0 (0.0 to 0.0)                    |
| Morocco                                       | 0.0 (0.0 to 0.0)           | 0.0 (0.0 to 0.0)           | 0.0 (0.0 to 0.0)           | 0.0 (0.0 to 0.0)           | 0.0 (0.0 to 0.0)                               | 0.0 (0.0 to 0.0)                    |
| Palestine                                     | 0.0 (0.0 to 0.0)           | 0.0 (0.0 to 0.0)           | 0.0 (0.0 to 0.0)           | 0.0 (0.0 to 0.0)           | 0.0 (0.0 to 0.0)                               | 0.0 (0.0 to 0.0)                    |
| Oman                                          | 0.0 (0.0 to 0.0)           | 0.0 (0.0 to 0.0)           | 0.0 (0.0 to 0.0)           | 0.0 (0.0 to 0.0)           | 0.0 (0.0 to 0.0)                               | 0.0 (0.0 to 0.0)                    |
| Qatar                                         | 0.0 (0.0 to 0.0)           | 0.0 (0.0 to 0.0)           | 0.0 (0.0 to 0.0)           | 0.0 (0.0 to 0.0)           | 0.0 (0.0 to 0.0)                               | 0.0 (0.0 to 0.0)                    |
| Saudi Arabia                                  | 0.5 (0.5 to 0.5)           | 0.0 (0.0 to 0.0)           | 0.0 (0.0 to 0.0)           | 0.0 (0.0 to 0.0)           | -9.6 (-10.1 to -9.0)                           | -76.1 (-78.1 to -74.0)              |
| Sudan                                         | 77.6 (56.3 to 103.0)       | 37.0 (23.9 to 52.3)        | 43.9 (22.4 to 68.3)        | 37.5 (13.6 to 77.5)        | -0.4 (-3.9 to 2.9)                             | -2.3 (-44.2 to 54.0)                |
| Syria                                         | 0.0 (0.0 to 0.0)           | 0.0 (0.0 to 0.0)           | 0.0 (0.0 to 0.0)           | 0.0 (0.0 to 0.0)           | 0.0 (0.0 to 0.0)                               | 0.0 (0.0 to 0.0)                    |
| Tunisia                                       | 0.0 (0.0 to 0.0)           | 0.0 (0.0 to 0.0)           | 0.0 (0.0 to 0.0)           | 0.0 (0.0 to 0.0)           | 0.0 (0.0 to 0.0)                               | 0.0 (0.0 to 0.0)                    |
| Turkey                                        | 0.2 (0.2 to 0.2)           | 0.0 (0.0 to 0.0)           | 0.0 (0.0 to 0.0)           | 0.0 (0.0 to 0.0)           | 0.0 (0.0 to 0.0)                               | 0.0 (0.0 to 0.0)                    |
| United Arab Emirates                          | 0.0 (0.0 to 0.0)           | 0.0 (0.0 to 0.0)           | 0.0 (0.0 to 0.0)           | 0.0 (0.0 to 0.0)           | 0.0 (0.0 to 0.0)                               | 0.0 (0.0 to 0.0)                    |
| Yemen                                         | 90.7 (51.4 to 142.1)       | 45.6 (40.0 to 52.2)        | 40.2 (23.8 to 47.6)        | 25.1 (18.4 to 34.3)        | -4.0 (-5.4 to -2.5)                            | -45.2 (-55.7 to -30.9)              |
| <b>South Asia</b>                             |                            |                            |                            |                            |                                                |                                     |
| <b>South Asia</b>                             |                            |                            |                            |                            |                                                |                                     |
| Bangladesh                                    | 8.1 (6.5 to 10.1)          | 0.3 (0.3 to 0.4)           | 0.1 (0.1 to 0.1)           | 0.0 (0.0 to 0.0)           | -30.1 (-32.6 to -27.9)                         | -98.9 (-99.2 to -98.5)              |
| Bhutan                                        | 43.5 (34.8 to 54.3)        | 0.1 (0.1 to 0.1)           | 0.0 (0.0 to 0.0)           | 0.0 (0.0 to 0.0)           | -41.8 (-44.0 to -39.7)                         | -99.8 (-99.9 to -99.7)              |
| India                                         | 24.8 (23.8 to 25.9)        | 12.4 (11.9 to 12.8)        | 10.2 (9.7 to 10.7)         | 4.6 (4.1 to 5.2)           | -6.6 (-7.2 to -5.9)                            | -62.6 (-66.0 to -59.0)              |
| Nepal                                         | 2.0 (1.7 to 2.5)           | 0.5 (0.5 to 0.6)           | 0.2 (0.1 to 0.2)           | 0.0 (0.0 to 0.0)           | -21.8 (-23.1 to -20.5)                         | -96.2 (-96.9 to -95.4)              |
| Pakistan                                      | 29.3 (27.5 to 31.2)        | 31.3 (30.1 to 32.4)        | 25.1 (23.8 to 26.4)        | 22.0 (18.4 to 25.7)        | -2.4 (-3.4 to -1.4)                            | -29.6 (-40.2 to -18.9)              |
| <b>Southeast Asia, East Asia, and Oceania</b> |                            |                            |                            |                            |                                                |                                     |
| <b>East Asia</b>                              |                            |                            |                            |                            |                                                |                                     |
| China                                         | 0.1 (0.0 to 0.3)           | 0.0 (0.0 to 0.0)           | 0.0 (0.0 to 0.0)           | 0.0 (0.0 to 0.0)           | -55.6 (-61.7 to -51.3)                         | -100.0 (-100.0 to -100.0)           |
| North Korea                                   | 16.0 (11.0 to 22.8)        | 0.8 (0.6 to 0.9)           | 0.4 (0.3 to 0.6)           | 0.0 (0.0 to 0.1)           | -17.1 (-20.1 to -14.5)                         | -92.1 (-95.1 to -88.7)              |
| Taiwan (Province of China)                    | 0.0 (0.0 to 0.0)           | 0.0 (0.0 to 0.0)           | 0.0 (0.0 to 0.0)           | 0.0 (0.0 to 0.0)           | 0.0 (0.0 to 0.0)                               | 0.0 (0.0 to 0.0)                    |
| <b>Oceania</b>                                |                            |                            |                            |                            |                                                |                                     |
| American Samoa                                | 0.0 (0.0 to 0.0)           | 0.0 (0.0 to 0.0)           | 0.0 (0.0 to 0.0)           | 0.0 (0.0 to 0.0)           | 0.0 (0.0 to 0.0)                               | 0.0 (0.0 to 0.0)                    |
| Federated States of Micronesia                | 0.0 (0.0 to 0.0)           | 0.0 (0.0 to 0.0)           | 0.0 (0.0 to 0.0)           | 0.0 (0.0 to 0.0)           | 0.0 (0.0 to 0.0)                               | 0.0 (0.0 to 0.0)                    |
| Fiji                                          | 0.0 (0.0 to 0.0)           | 0.0 (0.0 to 0.0)           | 0.0 (0.0 to 0.0)           | 0.0 (0.0 to 0.0)           | 0.0 (0.0 to 0.0)                               | 0.0 (0.0 to 0.0)                    |
| Guam                                          | 0.0 (0.0 to 0.0)           | 0.0 (0.0 to 0.0)           | 0.0 (0.0 to 0.0)           | 0.0 (0.0 to 0.0)           | 0.0 (0.0 to 0.0)                               | 0.0 (0.0 to 0.0)                    |
| Kiribati                                      | 0.0 (0.0 to 0.0)           | 0.0 (0.0 to 0.0)           | 0.0 (0.0 to 0.0)           | 0.0 (0.0 to 0.0)           | 0.0 (0.0 to 0.0)                               | 0.0 (0.0 to 0.0)                    |
| Marshall Islands                              | 0.0 (0.0 to 0.0)           | 0.0 (0.0 to 0.0)           | 0.0 (0.0 to 0.0)           | 0.0 (0.0 to 0.0)           | 0.0 (0.0 to 0.0)                               | 0.0 (0.0 to 0.0)                    |
| Northern Mariana Islands                      | 0.0 (0.0 to 0.0)           | 0.0 (0.0 to 0.0)           | 0.0 (0.0 to 0.0)           | 0.0 (0.0 to 0.0)           | 0.0 (0.0 to 0.0)                               | 0.0 (0.0 to 0.0)                    |
| Papua New Guinea                              | 311.8 (263.1 to 369.7)     | 131.2 (116.6 to 147.1)     | 127.3 (107.9 to 148.4)     | 79.7 (60.4 to 102.8)       | -3.4 (-4.5 to -2.3)                            | -39.4 (-49.3 to -28.8)              |

|                                                                                                 | Estimate in 2000 (95% UIs) | Estimate in 2015 (95% UIs) | Estimate in 2017 (95% UIs) | Estimate in 2020 (95% UIs) | Annualised rate of change, 2015-2020 (95% UIs) | Percent change, 2015-2020 (95% UIs) |
|-------------------------------------------------------------------------------------------------|----------------------------|----------------------------|----------------------------|----------------------------|------------------------------------------------|-------------------------------------|
| Samoa                                                                                           | 0.0 (0.0 to 0.0)           | 0.0 (0.0 to 0.0)           | 0.0 (0.0 to 0.0)           | 0.0 (0.0 to 0.0)           | 0.0 (0.0 to 0.0)                               | 0.0 (0.0 to 0.0)                    |
| Solomon Islands                                                                                 | 275.6 (150.0 to 455.4)     | 164.4 (150.0 to 181.3)     | 157.0 (131.3 to 184.4)     | 117.5 (84.5 to 158.8)      | -2.3 (-4.0 to -0.6)                            | -28.5 (-45.1 to -9.1)               |
| Tonga                                                                                           | 0.0 (0.0 to 0.0)           | 0.0 (0.0 to 0.0)           | 0.0 (0.0 to 0.0)           | 0.0 (0.0 to 0.0)           | 0.0 (0.0 to 0.0)                               | 0.0 (0.0 to 0.0)                    |
| Vanuatu                                                                                         | 171.4 (145.6 to 198.8)     | 23.8 (21.0 to 25.9)        | 12.3 (10.0 to 15.0)        | 1.7 (1.1 to 2.5)           | -17.7 (-19.5 to -15.8)                         | -92.9 (-94.6 to -90.7)              |
| <b>Southeast Asia</b>                                                                           |                            |                            |                            |                            |                                                |                                     |
| Cambodia                                                                                        | 46.0 (39.8 to 52.1)        | 4.5 (4.3 to 4.7)           | 3.4 (3.2 to 3.6)           | 0.7 (0.6 to 0.8)           | -12.1 (-12.7 to -11.5)                         | -83.7 (-85.2 to -82.2)              |
| Indonesia                                                                                       | 7.0 (6.4 to 7.5)           | 6.1 (6.0 to 6.4)           | 4.9 (4.6 to 5.3)           | 3.2 (2.7 to 3.9)           | -4.3 (-5.3 to -3.3)                            | -47.4 (-55.0 to -39.3)              |
| Laos                                                                                            | 77.5 (50.6 to 111.6)       | 6.6 (5.6 to 7.8)           | 6.3 (5.1 to 8.0)           | 1.8 (1.2 to 2.7)           | -8.8 (-10.6 to -6.8)                           | -73.0 (-79.7 to -64.0)              |
| Malaysia                                                                                        | 1.8 (1.5 to 2.1)           | 0.1 (0.1 to 0.1)           | 0.1 (0.1 to 0.1)           | 0.0 (0.0 to 0.0)           | -16.4 (-17.6 to -15.1)                         | -91.4 (-92.9 to -89.6)              |
| Maldives                                                                                        | 0.0 (0.0 to 0.0)           | 0.0 (0.0 to 0.0)           | 0.0 (0.0 to 0.0)           | 0.0 (0.0 to 0.0)           | 0.0 (0.0 to 0.0)                               | 0.0 (0.0 to 0.0)                    |
| Mauritius                                                                                       | 0.0 (0.0 to 0.0)           | 0.0 (0.0 to 0.0)           | 0.0 (0.0 to 0.0)           | 0.0 (0.0 to 0.0)           | 0.0 (0.0 to 0.0)                               | 0.0 (0.0 to 0.0)                    |
| Myanmar                                                                                         | 32.3 (24.8 to 41.6)        | 17.7 (15.3 to 20.4)        | 5.0 (4.4 to 5.8)           | 1.1 (0.9 to 1.5)           | -18.3 (-19.4 to -17.2)                         | -93.5 (-94.5 to -92.4)              |
| Philippines                                                                                     | 1.6 (1.3 to 1.8)           | 0.2 (0.2 to 0.2)           | 0.1 (0.1 to 0.2)           | 0.0 (0.0 to 0.0)           | -17.1 (-18.5 to -15.8)                         | -92.3 (-93.8 to -90.6)              |
| Sri Lanka                                                                                       | 31.7 (26.9 to 37.2)        | 0.0 (0.0 to 0.0)           | 0.0 (0.0 to 0.0)           | 0.0 (0.0 to 0.0)           | -106.6 (-107.4 to -105.7)                      | -100.0 (-100.0 to -100.0)           |
| Seychelles                                                                                      | 0.0 (0.0 to 0.0)           | 0.0 (0.0 to 0.0)           | 0.0 (0.0 to 0.0)           | 0.0 (0.0 to 0.0)           | 0.0 (0.0 to 0.0)                               | 0.0 (0.0 to 0.0)                    |
| Thailand                                                                                        | 2.9 (2.6 to 3.4)           | 0.4 (0.4 to 0.5)           | 0.1 (0.1 to 0.1)           | 0.0 (0.0 to 0.0)           | -26.8 (-28.0 to -25.7)                         | -98.2 (-98.5 to -97.9)              |
| Timor-Leste                                                                                     | 56.5 (45.8 to 69.7)        | 25.7 (25.0 to 26.3)        | 0.1 (0.1 to 0.1)           | 0.0 (0.0 to 0.0)           | -51.8 (-53.5 to -50.2)                         | -100.0 (-100.0 to -99.9)            |
| Vietnam                                                                                         | 3.9 (3.2 to 4.7)           | 0.3 (0.3 to 0.4)           | 0.2 (0.1 to 0.2)           | 0.0 (0.0 to 0.0)           | -18.0 (-19.7 to -16.6)                         | -93.2 (-94.8 to -91.7)              |
| <b>Sub-Saharan Africa</b>                                                                       |                            |                            |                            |                            |                                                |                                     |
| <b>Central Sub-Saharan Africa</b>                                                               |                            |                            |                            |                            |                                                |                                     |
| Angola                                                                                          | 173.6 (104.9 to 246.1)     | 115.0 (93.3 to 143.8)      | 129.8 (104.2 to 162.4)     | 119.1 (88.0 to 163.0)      | 0.2 (-1.2 to 1.7)                              | 3.5 (-16.1 to 29.6)                 |
| Central African Republic                                                                        | 295.2 (198.0 to 392.3)     | 289.3 (151.3 to 380.6)     | 239.3 (126.9 to 365.6)     | 208.5 (79.2 to 372.5)      | -2.0 (-5.7 to 0.4)                             | -23.7 (-37.3 to -6.3)               |
| Congo                                                                                           | 245.9 (153.8 to 332.4)     | 177.7 (114.5 to 256.0)     | 180.6 (109.5 to 291.3)     | 160.6 (74.6 to 317.1)      | -1.0 (-3.4 to 1.5)                             | -11.9 (-39.9 to 24.9)               |
| Democratic Republic of the Congo                                                                | 303.7 (244.8 to 379.6)     | 222.6 (179.8 to 277.6)     | 219.5 (172.8 to 274.3)     | 175.4 (117.7 to 227.7)     | -1.6 (-2.9 to -0.8)                            | -21.5 (-35.3 to -11.7)              |
| Equatorial Guinea                                                                               | 253.1 (169.1 to 321.5)     | 232.9 (162.3 to 298.5)     | 224.0 (117.6 to 301.6)     | 199.6 (70.2 to 308.7)      | -1.4 (-5.6 to 0.8)                             | -16.1 (-56.8 to 12.5)               |
| Gabon                                                                                           | 262.5 (177.8 to 353.4)     | 157.4 (97.5 to 259.4)      | 169.0 (95.3 to 297.0)      | 160.6 (51.9 to 381.2)      | -0.5 (-4.9 to 2.7)                             | -2.4 (-52.3 to 49.1)                |
| <b>Eastern Sub-Saharan Africa</b>                                                               |                            |                            |                            |                            |                                                |                                     |
| Burundi                                                                                         | 292.3 (177.9 to 384.5)     | 152.6 (109.0 to 200.3)     | 169.8 (125.4 to 214.7)     | 140.2 (96.5 to 187.3)      | -0.6 (-1.6 to 0.6)                             | -8.1 (-21.4 to 9.3)                 |
| Comoros                                                                                         | 331.4 (22.2 to 1572.8)     | 123.9 (99.0 to 154.6)      | 5.4 (4.0 to 7.1)           | 1.4 (0.5 to 1.8)           | -32.0 (-35.9 to -28.9)                         | -99.2 (-99.5 to -98.7)              |
| Djibouti                                                                                        | 8.2 (5.8 to 11.5)          | 20.1 (15.8 to 24.5)        | 33.4 (24.6 to 41.5)        | 36.2 (24.6 to 49.2)        | 3.8 (2.5 to 5.2)                               | 77.9 (45.1 to 119.1)                |
| Eritrea                                                                                         | 46.3 (21.3 to 88.5)        | 17.2 (14.8 to 20.1)        | 13.4 (10.5 to 17.4)        | 6.8 (4.1 to 10.6)          | -6.4 (-8.9 to -3.9)                            | -61.1 (-73.7 to -44.5)              |
| Ethiopia                                                                                        | 76.4 (45.6 to 117.4)       | 12.3 (8.5 to 17.4)         | 13.9 (8.8 to 23.4)         | 5.8 (2.4 to 11.5)          | -5.8 (-6.7 to -2.2)                            | -56.0 (-76.5 to -28.3)              |
| Kenya                                                                                           | 152.2 (117.7 to 193.3)     | 52.1 (36.5 to 67.8)        | 53.1 (37.9 to 72.7)        | 30.3 (18.4 to 42.8)        | -3.7 (-5.4 to -2.2)                            | -42.4 (-55.8 to -28.0)              |
| Madagascar                                                                                      | 109.6 (81.6 to 135.2)      | 71.1 (53.6 to 87.2)        | 70.9 (53.1 to 87.3)        | 52.3 (35.5 to 70.6)        | -2.1 (-3.5 to -0.9)                            | -26.7 (-40.9 to -12.7)              |
| Malawi                                                                                          | 349.5 (290.1 to 429.8)     | 202.1 (146.1 to 264.6)     | 176.0 (106.5 to 242.8)     | 118.9 (56.4 to 195.0)      | -3.8 (-6.6 to -1.6)                            | -42.2 (-63.0 to -21.1)              |
| Mozambique                                                                                      | 335.5 (266.9 to 426.0)     | 216.4 (178.8 to 262.6)     | 207.9 (169.5 to 258.2)     | 153.6 (118.5 to 200.8)     | -2.3 (-3.2 to -1.4)                            | -29.1 (-38.4 to -18.9)              |
| Rwanda                                                                                          | 103.6 (39.6 to 190.2)      | 44.6 (32.9 to 57.6)        | 50.4 (36.8 to 68.0)        | 47.1 (26.8 to 78.5)        | 0.1 (-2.4 to 4.2)                              | 4.7 (-30.3 to 89.1)                 |
| Somalia                                                                                         | 69.8 (40.5 to 108.2)       | 23.9 (17.1 to 33.2)        | 30.9 (18.9 to 48.6)        | 21.3 (8.4 to 42.4)         | -1.2 (-4.8 to 2.4)                             | -13.5 (-51.6 to 43.9)               |
| South Sudan                                                                                     | 213.3 (144.4 to 291.6)     | 136.7 (97.2 to 189.1)      | 136.9 (86.2 to 204.4)      | 110.0 (55.6 to 195.7)      | -1.7 (-4.2 to 0.3)                             | -20.8 (-46.7 to 5.4)                |
| Tanzania                                                                                        | 227.8 (178.2 to 289.1)     | 108.7 (81.1 to 142.3)      | 107.4 (81.9 to 141.4)      | 72.0 (52.4 to 97.7)        | -2.8 (-4.0 to -1.6)                            | -34.0 (-45.1 to -21.9)              |
| Uganda                                                                                          | 314.4 (247.1 to 402.3)     | 212.7 (168.4 to 273.8)     | 206.1 (160.4 to 263.9)     | 158.9 (117.3 to 199.0)     | -2.0 (-2.7 to -1.3)                            | -25.4 (-32.9 to -17.3)              |
| Zambia                                                                                          | 181.7 (143.2 to 234.9)     | 123.7 (99.8 to 158.8)      | 139.1 (110.2 to 179.6)     | 127.7 (91.6 to 178.2)      | 0.1 (-1.2 to 1.5)                              | 2.7 (-16.0 to 24.5)                 |
| <b>Southern Sub-Saharan Africa</b>                                                              |                            |                            |                            |                            |                                                |                                     |
| Botswana                                                                                        | 4.1 (3.3 to 5.2)           | 0.1 (0.0 to 1.2)           | 0.6 (0.5 to 0.7)           | 0.2 (0.1 to 0.3)           | -11.7 (-13.7 to -9.9)                          | -82.6 (-87.2 to -77.4)              |
| Lesotho                                                                                         | 0.0 (0.0 to 0.0)           | 0.0 (0.0 to 0.0)           | 0.0 (0.0 to 0.0)           | 0.0 (0.0 to 0.0)           | 0.0 (0.0 to 0.0)                               | 0.0 (0.0 to 0.0)                    |
| Namibia                                                                                         | 109.6 (10.6 to 464.6)      | 6.7 (5.9 to 7.6)           | 16.0 (13.5 to 19.0)        | 6.4 (3.9 to 10.0)          | -0.5 (-3.3 to 2.4)                             | -4.7 (-38.7 to 43.5)                |
| South Africa                                                                                    | 0.1 (0.1 to 0.2)           | 0.1 (0.1 to 0.2)           | 0.1 (0.0 to 0.1)           | 0.0 (0.0 to 0.0)           | -19.8 (-22.0 to -17.5)                         | -94.8 (-96.3 to -92.8)              |
| Swaziland                                                                                       | 5.7 (4.4 to 7.3)           | 0.3 (0.2 to 0.3)           | 0.3 (0.2 to 0.3)           | 0.0 (0.0 to 0.1)           | -15.4 (-18.3 to -12.6)                         | -89.8 (-93.5 to -85.0)              |
| Zimbabwe                                                                                        | 171.9 (101.8 to 275.5)     | 53.8 (45.5 to 63.1)        | 46.9 (36.3 to 59.5)        | 24.6 (15.8 to 36.5)        | -5.3 (-7.3 to -3.5)                            | -54.6 (-66.4 to -40.6)              |
| <b>Western Sub-Saharan Africa</b>                                                               |                            |                            |                            |                            |                                                |                                     |
| Benin                                                                                           | 285.4 (210.4 to 385.9)     | 256.5 (187.2 to 334.9)     | 253.8 (166.7 to 360.5)     | 227.4 (124.4 to 371.2)     | -0.7 (-3.4 to 1.0)                             | -8.9 (-40.2 to 16.6)                |
| Burkina Faso                                                                                    | 387.9 (307.3 to 468.6)     | 311.8 (250.2 to 374.0)     | 257.0 (196.6 to 326.5)     | 189.7 (128.9 to 278.3)     | -3.4 (-5.0 to -1.7)                            | -39.4 (-52.7 to -22.7)              |
| Cameroon                                                                                        | 242.7 (182.4 to 316.9)     | 193.2 (141.8 to 260.9)     | 195.4 (125.1 to 269.3)     | 170.1 (86.6 to 273.7)      | -1.1 (-3.6 to 1.0)                             | -13.4 (-42.1 to 15.7)               |
| Cape Verde                                                                                      | 0.6 (0.5 to 0.8)           | 0.3 (0.2 to 0.3)           | 0.3 (0.3 to 0.4)           | 0.3 (0.2 to 0.5)           | 1.4 (-0.3 to 3.0)                              | 23.6 (-4.7 to 57.1)                 |
| Chad                                                                                            | 157.2 (97.0 to 248.2)      | 166.8 (123.5 to 215.2)     | 129.8 (65.7 to 210.9)      | 107.9 (30.7 to 218.4)      | -3.6 (-9.1 to 0.2)                             | -37.9 (-74.5 to 3.5)                |
| Cote d'Ivoire                                                                                   | 331.6 (258.9 to 408.4)     | 185.6 (138.5 to 238.7)     | 127.8 (78.8 to 184.0)      | 68.5 (32.1 to 112.7)       | -7.0 (-10.0 to -4.5)                           | -63.9 (-77.7 to -48.8)              |
| The Gambia                                                                                      | 172.3 (119.7 to 241.5)     | 27.6 (19.9 to 36.3)        | 16.8 (9.4 to 28.1)         | 4.1 (1.4 to 9.7)           | -13.4 (-18.0 to -8.6)                          | -85.8 (-93.2 to -72.4)              |
| Ghana                                                                                           | 313.5 (244.7 to 408.6)     | 214.1 (166.3 to 271.9)     | 164.3 (120.3 to 209.7)     | 105.5 (70.2 to 150.4)      | -4.8 (-6.0 to -3.4)                            | -51.0 (-59.1 to -40.0)              |
| Guinea                                                                                          | 291.0 (211.4 to 385.7)     | 268.8 (217.7 to 322.7)     | 237.8 (169.7 to 296.7)     | 203.3 (121.2 to 307.8)     | -2.0 (-4.1 to 0.3)                             | -24.9 (-45.9 to 4.0)                |
| Guinea-Bissau                                                                                   | 249.6 (123.5 to 380.4)     | 56.5 (28.6 to 100.9)       | 38.0 (12.8 to 90.3)        | 14.7 (2.1 to 49.6)         | -11.0 (-18.9 to -3.8)                          | -77.2 (-94.1 to -43.6)              |
| Liberia                                                                                         | 223.3 (121.5 to 336.8)     | 211.6 (145.1 to 297.3)     | 183.2 (91.0 to 308.6)      | 166.9 (37.6 to 383.5)      | -2.4 (-8.8 to 2.5)                             | -25.5 (-73.2 to 46.1)               |
| Mali                                                                                            | 276.1 (217.6 to 354.4)     | 212.0 (164.2 to 253.7)     | 189.4 (110.8 to 232.5)     | 149.9 (110.3 to 205.3)     | -2.4 (-3.9 to -1.2)                            | -29.4 (-44.3 to -16.9)              |
| Mauritania                                                                                      | 51.0 (23.3 to 108.4)       | 32.1 (19.3 to 51.3)        | 36.5 (20.0 to 65.9)        | 33.7 (11.9 to 88.4)        | -0.3 (-5.0 to 4.9)                             | 0.3 (-53.0 to 108.0)                |
| Niger                                                                                           | 214.0 (111.6 to 326.5)     | 259.2 (161.5 to 341.9)     | 237.2 (139.3 to 341.0)     | 250.6 (111.2 to 419.3)     | -0.5 (-3.3 to 2.1)                             | -4.9 (-38.7 to 36.1)                |
| Nigeria                                                                                         | 283.6 (211.9 to 351.0)     | 198.6 (159.0 to 245.5)     | 166.0 (127.1 to 214.5)     | 110.6 (75.5 to 156.9)      | -4.0 (-5.4 to -2.7)                            | -44.7 (-55.4 to -32.9)              |
| Sao Tome and Principe                                                                           | 360.3 (269.0 to 471.4)     | 20.8 (17.9 to 23.8)        | 20.1 (16.3 to 24.0)        | 6.9 (4.8 to 9.3)           | -7.5 (-9.0 to -6.0)                            | -67.1 (-74.1 to -59.6)              |
| Senegal                                                                                         | 158.6 (114.6 to 214.3)     | 53.7 (41.3 to 67.0)        | 38.1 (27.8 to 50.8)        | 16.1 (10.1 to 25.1)        | -8.1 (-9.9 to -6.2)                            | -70.1 (-77.3 to -60.8)              |
| Sierra Leone                                                                                    | 287.4 (146.2 to 392.4)     | 314.8 (264.5 to 391.2)     | 285.0 (223.1 to 368.9)     | 275.1 (188.9 to 418.3)     | -1.0 (-3.0 to 0.9)                             | -12.8 (-36.1 to 13.6)               |
| Togo                                                                                            | 333.8 (247.8 to 437.3)     | 282.7 (223.7 to 370.1)     | 302.4 (225.6 to 393.4)     | 297.8 (181.0 to 406.1)     | 0.3 (-1.3 to 2.0)                              | 5.0 (-17.5 to 34.6)                 |
| <b>Indicator 3.3.4: Age-standardised rate of hepatitis B incidence (per 100,000 population)</b> |                            |                            |                            |                            |                                                |                                     |
| <b>Central Europe, Eastern Europe, and Central Asia</b>                                         |                            |                            |                            |                            |                                                |                                     |
| <b>Central Asia</b>                                                                             |                            |                            |                            |                            |                                                |                                     |
| Armenia                                                                                         | 2207.9 (1849.0 to 2575.1)  | 2080.2 (1790.5 to 2387.0)  | 2105.4 (1755.8 to 2476.9)  | 1691.0 (1299.0 to 2226.9)  | -1.4 (-2.8 to 0.1)                             | -18.8 (-34.1 to 2.3)                |
| Azerbaijan                                                                                      | 3093.6 (2594.0 to 3639.9)  | 2839.1 (2430.8 to 3267.9)  | 2889.3 (2391.4 to 3421.0)  | 2346.7 (1835.5 to 2884.8)  | -1.3 (-2.4 to -0.3)                            | -17.4 (-29.9 to -4.5)               |
| Georgia                                                                                         | 2085.0 (1713.7 to 2524.6)  | 1949.5 (1628.9 to 2344.9)  | 1962.3 (1599.7 to 2434.3)  | 1461.5 (1075.2 to 1854.6)  | -2.2 (-3.5 to -0.8)                            | -27.5 (-40.9 to -11.5)              |
| Kazakhstan                                                                                      | 2051.2 (1673.1 to 2485.8)  | 2246.4 (1858.5 to 2657.6)  | 2318.4 (1875.8 to 2803.7)  | 1655.6 (1174.3 to 2222.0)  | -2.1 (-3.9 to -0.4)                            | -26.4 (-44.0 to -6.5)               |
| Kyrgyzstan                                                                                      | 2928.8 (2402.8 to 3590.2)  | 2915.1 (2436.9 to 3496.8)  | 2924.3 (2382.6 to 3610.5)  | 2153.7 (1586.2 to 2887.7)  | -2.1 (-3.7 to -0.6)                            | -26.2 (-42.3 to -8.5)               |
| Mongolia                                                                                        | 4764.9 (4059.8 to 5582.6)  | 5016.2 (4377.0 to 5716.8)  | 5011.2 (4279.8 to 5930.9)  | 3778.1 (3076.7 to 4682.8)  | -1.9 (-3.0 to -0.9)                            | -24.7 (-36.4 to -12.0)              |
| Tajikistan                                                                                      | 2407.8 (1930.1 to 2904.5)  | 2288.0 (1909.4 to 2708.7)  | 2319.8 (1894.5 to 2842.4)  | 1869.1 (1402.0 to 2423.1)  | -1.4 (-2.8 to -0.0)                            | -18.4 (-34.4 to -0.2)               |
| Turkmenistan                                                                                    | 3065.3 (2510.0 to 3817.8)  | 2922.1 (2403.5 to 3533.2)  | 2974.7 (2390.5 to 3733.4)  | 2047.5 (1560.8 to 2713.7)  | -2.4 (-3.6 to -1.0)                            | -30.0 (-41.8 to -13.9)              |

|                                    | Estimate in 2000 (95% UIs) | Estimate in 2015 (95% UIs) | Estimate in 2017 (95% UIs) | Estimate in 2030 (95% UIs) | Annualised rate of change, 2015-2030 (95% UIs) | Percent change, 2015-2030 (95% UIs) |
|------------------------------------|----------------------------|----------------------------|----------------------------|----------------------------|------------------------------------------------|-------------------------------------|
| Uzbekistan                         | 2880.4 (2347.7 to 3567.8)  | 2733.1 (2277.6 to 3288.4)  | 2781.5 (2265.8 to 3400.0)  | 2072.1 (1627.1 to 2629.3)  | -1.9 (-3.0 to -0.8)                            | -24.2 (-36.0 to -12.0)              |
| <b>Central Europe</b>              |                            |                            |                            |                            |                                                |                                     |
| Albania                            | 899.8 (751.4 to 1053.3)    | 899.0 (761.8 to 1041.2)    | 899.8 (753.3 to 1069.8)    | 822.5 (662.9 to 1018.6)    | -0.6 (-1.7 to 0.3)                             | -8.5 (-22.0 to 4.1)                 |
| Bosnia and Herzegovina             | 903.6 (761.2 to 1061.3)    | 929.2 (793.0 to 1096.1)    | 933.8 (775.5 to 1121.1)    | 750.7 (610.8 to 925.7)     | -1.4 (-2.2 to -0.6)                            | -19.3 (-27.9 to -9.0)               |
| Bulgaria                           | 1173.2 (979.3 to 1408.5)   | 1216.5 (1032.2 to 1434.8)  | 1232.5 (1035.4 to 1477.6)  | 939.8 (739.0 to 1163.9)    | -1.7 (-2.7 to -0.8)                            | -22.8 (-33.7 to -11.1)              |
| Croatia                            | 1027.0 (871.1 to 1214.8)   | 1047.8 (906.9 to 1211.0)   | 1062.4 (899.1 to 1253.2)   | 922.4 (745.4 to 1146.2)    | -0.9 (-1.8 to 0.2)                             | -12.0 (-23.6 to 3.8)                |
| Czech Republic                     | 994.6 (838.3 to 1193.3)    | 900.8 (779.7 to 1050.4)    | 902.7 (761.5 to 1074.3)    | 739.7 (607.9 to 908.5)     | -1.3 (-2.3 to -0.5)                            | -17.9 (-28.7 to -6.7)               |
| Hungary                            | 1942.2 (1631.0 to 2325.4)  | 1978.2 (1700.1 to 2281.2)  | 1961.0 (1644.3 to 2311.5)  | 1650.8 (1209.3 to 2253.3)  | -1.3 (-3.1 to 0.7)                             | -16.6 (-36.8 to 11.0)               |
| Macedonia                          | 893.8 (757.5 to 1072.5)    | 821.5 (712.1 to 946.1)     | 824.0 (692.2 to 983.0)     | 748.8 (598.2 to 940.6)     | -0.6 (-1.6 to 0.5)                             | -8.9 (-21.1 to 7.0)                 |
| Montenegro                         | 790.6 (665.2 to 937.4)     | 723.5 (619.1 to 832.1)     | 749.8 (618.7 to 878.4)     | 625.6 (496.4 to 768.4)     | -1.0 (-2.0 to -0.1)                            | -13.6 (-25.7 to -1.1)               |
| Poland                             | 666.4 (573.2 to 782.1)     | 681.5 (593.3 to 788.9)     | 680.0 (578.6 to 809.8)     | 514.8 (424.6 to 629.0)     | -1.9 (-2.7 to -1.0)                            | -24.5 (-33.7 to -14.1)              |
| Romania                            | 1371.4 (1134.5 to 1644.0)  | 1470.2 (1270.7 to 1694.0)  | 1492.8 (1252.2 to 1783.4)  | 995.2 (777.2 to 1275.3)    | -2.6 (-3.8 to -1.4)                            | -32.4 (-43.5 to -19.4)              |
| Serbia                             | 937.0 (773.1 to 1130.8)    | 849.4 (738.9 to 981.3)     | 855.8 (727.8 to 1010.5)    | 785.7 (604.3 to 950.0)     | -0.9 (-1.9 to 0.5)                             | -12.3 (-24.5 to 7.7)                |
| Slovakia                           | 1200.9 (1020.2 to 1410.7)  | 1254.9 (1083.5 to 1450.5)  | 1259.3 (1055.5 to 1492.3)  | 1026.2 (824.8 to 1263.4)   | -1.4 (-2.3 to -0.4)                            | -18.2 (-29.2 to -6.3)               |
| Slovenia                           | 1409.3 (1194.9 to 1683.8)  | 1465.4 (1280.7 to 1690.2)  | 1466.4 (1236.7 to 1743.5)  | 1283.9 (993.4 to 1626.2)   | -0.9 (-2.1 to 0.3)                             | -12.5 (-27.3 to 4.5)                |
| <b>Eastern Europe</b>              |                            |                            |                            |                            |                                                |                                     |
| Belarus                            | 848.1 (672.9 to 1046.7)    | 848.3 (690.4 to 1046.7)    | 857.8 (684.6 to 1081.0)    | 596.2 (435.6 to 803.7)     | -2.4 (-3.7 to -1.2)                            | -29.8 (-42.6 to -15.9)              |
| Estonia                            | 917.0 (750.0 to 1144.6)    | 906.4 (746.0 to 1076.9)    | 919.1 (738.2 to 1110.4)    | 735.5 (520.3 to 990.8)     | -1.5 (-3.5 to 0.3)                             | -18.8 (-40.7 to 4.9)                |
| Latvia                             | 805.2 (639.6 to 995.5)     | 859.5 (685.5 to 1042.9)    | 863.5 (678.5 to 1070.8)    | 609.0 (415.1 to 844.4)     | -2.4 (-4.7 to -0.4)                            | -29.1 (-50.3 to -5.7)               |
| Lithuania                          | 914.3 (739.5 to 1112.1)    | 949.3 (787.0 to 1162.2)    | 960.8 (774.8 to 1210.0)    | 672.2 (506.3 to 897.4)     | -2.3 (-3.8 to -0.9)                            | -29.2 (-43.7 to -12.0)              |
| Moldova                            | 2254.6 (1878.5 to 2691.5)  | 2356.0 (2041.5 to 2726.9)  | 2388.0 (2018.1 to 2828.8)  | 2217.3 (1625.8 to 2931.1)  | -0.5 (-2.5 to 1.2)                             | -5.9 (-28.3 to 19.5)                |
| Russia                             | 1175.4 (966.3 to 1405.8)   | 1259.6 (1051.5 to 1494.8)  | 1236.2 (1018.6 to 1493.5)  | 907.7 (624.2 to 1229.9)    | -2.3 (-4.2 to -0.6)                            | -28.4 (-47.1 to -8.3)               |
| Ukraine                            | 1223.4 (983.9 to 1512.4)   | 1436.0 (1167.2 to 1730.5)  | 1408.5 (1124.4 to 1740.1)  | 1029.8 (741.6 to 1383.7)   | -2.3 (-3.9 to -0.8)                            | -28.3 (-44.0 to -10.8)              |
| <b>High-income</b>                 |                            |                            |                            |                            |                                                |                                     |
| <b>Australasia</b>                 |                            |                            |                            |                            |                                                |                                     |
| Australia                          | 643.7 (554.6 to 745.1)     | 647.1 (548.1 to 736.9)     | 649.2 (532.6 to 758.5)     | 533.5 (422.2 to 652.8)     | -1.3 (-2.2 to -0.3)                            | -17.6 (-27.8 to -4.3)               |
| New Zealand                        | 868.0 (714.0 to 1031.7)    | 953.9 (784.3 to 1139.2)    | 1012.1 (824.6 to 1226.0)   | 829.9 (629.5 to 1057.5)    | -1.0 (-2.0 to 0.0)                             | -13.1 (-26.1 to 0.5)                |
| <b>High-income Asia Pacific</b>    |                            |                            |                            |                            |                                                |                                     |
| Brunei                             | 1740.1 (1471.7 to 2053.5)  | 1740.1 (1505.1 to 2026.4)  | 1763.2 (1486.8 to 2096.4)  | 1863.4 (1470.9 to 2374.4)  | 0.4 (-0.8 to 1.7)                              | 7.0 (-1.6 to 29.0)                  |
| Japan                              | 1269.7 (1064.8 to 1486.0)  | 1173.3 (1007.3 to 1344.9)  | 1217.6 (1034.3 to 1419.1)  | 1144.6 (945.1 to 1369.2)   | -0.2 (-0.9 to 0.5)                             | -2.5 (-12.8 to 8.6)                 |
| South Korea                        | 2984.7 (2568.4 to 3447.3)  | 2988.3 (2636.0 to 3357.2)  | 2981.2 (2546.1 to 3457.7)  | 3076.2 (2461.1 to 3859.6)  | 0.2 (-1.0 to 1.4)                              | 2.9 (-3.8 to 23.7)                  |
| Singapore                          | 1632.4 (1401.4 to 1878.3)  | 1583.4 (1404.1 to 1776.7)  | 1559.0 (1343.9 to 1807.3)  | 1566.6 (1139.1 to 1921.1)  | -0.1 (-1.3 to 1.0)                             | -1.1 (-18.3 to 15.8)                |
| <b>High-income North America</b>   |                            |                            |                            |                            |                                                |                                     |
| Canada                             | 467.9 (379.9 to 551.7)     | 430.8 (364.1 to 503.3)     | 428.3 (360.6 to 504.9)     | 348.0 (280.4 to 424.0)     | -1.4 (-2.2 to -0.7)                            | -19.3 (-28.0 to -9.8)               |
| Greenland                          | 336.3 (274.1 to 409.6)     | 348.0 (286.9 to 410.8)     | 356.0 (282.4 to 433.1)     | 321.5 (223.8 to 469.8)     | -0.6 (-2.4 to 1.7)                             | -7.7 (-30.3 to 29.4)                |
| United States                      | 313.3 (265.3 to 364.6)     | 313.9 (270.3 to 361.3)     | 328.4 (278.4 to 384.6)     | 334.5 (265.7 to 417.8)     | 0.4 (-0.9 to 1.5)                              | 6.5 (-12.4 to 25.7)                 |
| <b>Southern Latin America</b>      |                            |                            |                            |                            |                                                |                                     |
| Argentina                          | 302.8 (262.3 to 343.0)     | 294.1 (259.9 to 332.6)     | 296.9 (254.4 to 349.9)     | 245.4 (204.4 to 293.2)     | -1.2 (-1.9 to -0.5)                            | -16.6 (-25.1 to -6.6)               |
| Chile                              | 501.2 (429.0 to 579.0)     | 477.1 (419.9 to 541.8)     | 478.8 (412.1 to 556.0)     | 427.1 (356.6 to 509.2)     | -0.8 (-1.5 to -0.0)                            | -10.5 (-20.2 to -0.3)               |
| Uruguay                            | 261.3 (225.2 to 300.0)     | 266.5 (234.2 to 302.3)     | 264.4 (226.5 to 305.1)     | 227.6 (188.0 to 273.1)     | -1.1 (-1.9 to -0.2)                            | -14.7 (-24.5 to -2.8)               |
| <b>Western Europe</b>              |                            |                            |                            |                            |                                                |                                     |
| Andorra                            | 352.3 (295.9 to 412.7)     | 341.9 (291.0 to 395.6)     | 339.6 (284.9 to 400.7)     | 321.6 (251.6 to 401.2)     | -0.4 (-1.5 to 0.7)                             | -6.0 (-20.5 to 11.0)                |
| Austria                            | 486.8 (410.3 to 573.7)     | 452.5 (389.9 to 524.1)     | 450.8 (382.4 to 534.4)     | 395.7 (320.3 to 487.3)     | -0.9 (-1.8 to -0.0)                            | -12.6 (-24.1 to -0.4)               |
| Belgium                            | 454.7 (386.6 to 529.2)     | 424.8 (376.5 to 486.1)     | 426.4 (367.3 to 502.6)     | 371.4 (311.5 to 455.7)     | -0.9 (-1.7 to -0.0)                            | -12.6 (-22.0 to -0.7)               |
| Cyprus                             | 422.2 (360.5 to 489.2)     | 418.3 (356.3 to 475.2)     | 414.5 (346.2 to 486.1)     | 374.6 (298.2 to 477.6)     | -0.8 (-1.9 to 0.5)                             | -10.5 (-24.9 to 7.9)                |
| Denmark                            | 380.4 (322.0 to 446.9)     | 378.2 (323.6 to 440.4)     | 377.1 (314.1 to 447.6)     | 300.9 (236.0 to 386.0)     | -1.6 (-2.7 to -0.4)                            | -20.5 (-33.4 to -5.4)               |
| Finland                            | 458.6 (382.8 to 540.8)     | 468.9 (399.2 to 548.1)     | 470.8 (395.2 to 563.9)     | 375.8 (296.2 to 476.3)     | -1.5 (-2.7 to -0.3)                            | -19.9 (-33.6 to -5.1)               |
| France                             | 656.0 (548.2 to 786.3)     | 590.1 (512.0 to 676.2)     | 583.8 (499.9 to 689.8)     | 531.1 (442.6 to 643.1)     | -0.7 (-1.4 to 0.1)                             | -10.1 (-19.0 to 1.0)                |
| Germany                            | 370.0 (310.4 to 436.5)     | 347.1 (302.5 to 393.0)     | 346.0 (297.0 to 401.2)     | 297.6 (247.0 to 354.1)     | -1.0 (-1.9 to -0.2)                            | -14.3 (-24.9 to -3.3)               |
| Greece                             | 1126.8 (974.8 to 1289.0)   | 1108.4 (981.9 to 1258.3)   | 1114.7 (960.2 to 1293.1)   | 1021.9 (845.2 to 1200.0)   | -0.6 (-1.3 to 0.3)                             | -7.9 (-18.0 to 3.9)                 |
| Iceland                            | 316.6 (264.5 to 377.7)     | 311.4 (266.5 to 361.4)     | 305.6 (255.5 to 364.9)     | 273.8 (207.9 to 364.5)     | -0.9 (-2.2 to 0.7)                             | -12.1 (-28.4 to 10.9)               |
| Ireland                            | 359.9 (306.4 to 420.5)     | 321.6 (274.3 to 374.8)     | 324.0 (272.1 to 384.7)     | 264.6 (215.8 to 330.6)     | -1.3 (-2.1 to -0.4)                            | -17.8 (-27.2 to -5.3)               |
| Israel                             | 415.7 (352.8 to 478.5)     | 417.9 (362.3 to 480.9)     | 418.0 (353.9 to 493.1)     | 353.4 (279.0 to 443.8)     | -1.1 (-2.2 to -0.1)                            | -15.5 (-28.5 to -1.6)               |
| Italy                              | 765.9 (661.8 to 894.3)     | 781.7 (673.7 to 892.5)     | 784.0 (657.7 to 927.5)     | 683.9 (554.6 to 832.1)     | -0.9 (-1.7 to -0.1)                            | -12.6 (-22.2 to -2.1)               |
| Luxembourg                         | 517.7 (435.2 to 605.7)     | 521.2 (448.3 to 601.0)     | 522.7 (442.4 to 620.6)     | 451.6 (331.7 to 618.8)     | -1.0 (-2.8 to 0.7)                             | -14.4 (-33.9 to 11.8)               |
| Malta                              | 398.5 (335.6 to 467.0)     | 361.0 (310.0 to 419.9)     | 359.9 (302.1 to 424.2)     | 305.9 (232.2 to 403.1)     | -1.2 (-2.6 to 0.5)                             | -15.3 (-32.3 to 7.6)                |
| Netherlands                        | 373.4 (315.4 to 435.4)     | 332.4 (291.9 to 382.0)     | 306.6 (261.7 to 361.4)     | 206.6 (126.8 to 313.7)     | -1.6 (-2.3 to -0.9)                            | -21.7 (-29.5 to -12.8)              |
| Norway                             | 373.5 (315.5 to 437.6)     | 353.1 (300.1 to 408.9)     | 330.1 (274.9 to 389.1)     | 289.6 (229.2 to 364.8)     | -1.3 (-2.4 to -0.2)                            | -18.0 (-30.1 to -3.5)               |
| Portugal                           | 550.5 (462.7 to 647.4)     | 545.0 (470.9 to 632.5)     | 544.3 (455.9 to 652.3)     | 444.2 (343.6 to 579.6)     | -1.4 (-2.7 to 0.1)                             | -18.6 (-32.9 to 1.0)                |
| Spain                              | 449.6 (390.0 to 521.3)     | 447.1 (395.0 to 504.2)     | 447.6 (384.1 to 519.5)     | 379.2 (302.1 to 489.5)     | -1.1 (-2.3 to 0.3)                             | -15.2 (-29.7 to 5.1)                |
| Sweden                             | 291.1 (245.6 to 337.3)     | 311.7 (265.1 to 358.9)     | 327.9 (277.6 to 385.3)     | 254.1 (203.6 to 314.0)     | -1.4 (-2.2 to -0.4)                            | -18.5 (-28.4 to -5.4)               |
| Switzerland                        | 471.8 (397.2 to 548.7)     | 459.3 (397.8 to 526.8)     | 441.9 (375.0 to 519.7)     | 322.2 (245.5 to 417.5)     | -2.4 (-3.8 to -1.0)                            | -29.9 (-43.4 to -14.2)              |
| United Kingdom                     | 356.1 (293.2 to 429.9)     | 378.2 (323.8 to 440.8)     | 379.8 (321.4 to 450.2)     | 290.4 (238.9 to 355.8)     | -1.8 (-2.6 to -0.9)                            | -23.2 (-32.6 to -13.2)              |
| <b>Latin America and Caribbean</b> |                            |                            |                            |                            |                                                |                                     |
| <b>Andean Latin America</b>        |                            |                            |                            |                            |                                                |                                     |
| Bolivia                            | 1110.9 (950.1 to 1293.3)   | 1114.4 (969.4 to 1262.0)   | 1120.8 (964.0 to 1303.1)   | 809.6 (678.9 to 961.3)     | -2.1 (-2.9 to -1.5)                            | -27.4 (-34.9 to -19.6)              |
| Ecuador                            | 1157.3 (987.1 to 1336.6)   | 1135.6 (991.1 to 1303.9)   | 1143.8 (969.7 to 1342.3)   | 960.1 (801.7 to 1149.8)    | -1.1 (-1.7 to -0.5)                            | -15.5 (-23.0 to -7.7)               |
| Peru                               | 1049.9 (893.6 to 1224.4)   | 1014.1 (882.4 to 1160.0)   | 1030.4 (876.5 to 1202.9)   | 737.7 (568.8 to 946.4)     | -2.2 (-3.7 to -0.9)                            | -27.3 (-42.3 to -12.3)              |
| <b>Caribbean</b>                   |                            |                            |                            |                            |                                                |                                     |
| Antigua and Barbuda                | 460.4 (394.7 to 533.5)     | 470.2 (411.0 to 534.0)     | 473.1 (403.0 to 552.3)     | 459.9 (347.4 to 615.2)     | -0.2 (-1.6 to 1.6)                             | -2.2 (-21.8 to 27.4)                |
| The Bahamas                        | 546.9 (459.2 to 650.0)     | 493.2 (430.8 to 561.7)     | 493.3 (419.0 to 579.2)     | 463.0 (376.9 to 628.8)     | -0.2 (-1.5 to 1.4)                             | -2.1 (-20.2 to 23.9)                |
| Barbados                           | 454.0 (379.5 to 533.8)     | 423.4 (373.8 to 483.8)     | 424.6 (362.1 to 496.0)     | 402.1 (320.7 to 490.9)     | -0.4 (-1.3 to 0.5)                             | -6.0 (-17.6 to 7.9)                 |
| Belize                             | 619.8 (532.4 to 731.5)     | 616.8 (544.0 to 704.0)     | 617.7 (534.8 to 725.9)     | 594.1 (464.7 to 762.1)     | -0.3 (-1.6 to 1.1)                             | -3.7 (-20.9 to 18.1)                |
| Bermuda                            | 385.2 (324.4 to 448.2)     | 394.8 (340.6 to 452.5)     | 398.1 (333.3 to 468.5)     | 387.9 (243.7 to 667.6)     | -0.3 (-3.2 to 3.2)                             | -1.8 (-37.9 to 61.5)                |
| Cuba                               | 403.0 (340.9 to 467.6)     | 401.8 (353.0 to 456.3)     | 402.6 (346.8 to 470.0)     | 339.9 (284.1 to 414.4)     | -1.1 (-2.0 to -0.2)                            | -15.4 (-25.8 to -2.6)               |
| Dominica                           | 497.9 (423.8 to 579.1)     | 446.9 (389.7 to 510.4)     | 450.9 (385.9 to 530.1)     | 453.9 (354.3 to 592.8)     | 0.1 (-1.2 to 1.5)                              | 1.5 (-16.3 to 25.4)                 |
| Dominican Republic                 | 715.8 (619.4 to 835.5)     | 704.8 (618.6 to 800.5)     | 704.9 (602.8 to 816.9)     | 659.5 (543.6 to 802.6)     | -0.5 (-1.3 to 0.5)                             | -6.5 (-17.3 to 7.3)                 |
| Grenada                            | 505.5 (427.9 to 593.8)     | 508.1 (445.3 to 577.7)     | 508.2 (438.8 to 588.8)     | 483.9 (393.9 to 589.8)     | -0.3 (-1.3 to 0.6)                             | -4.8 (-17.9 to 10.0)                |
| Guyana                             | 731.2 (618.5 to 870.2)     | 658.4 (572.8 to 759.1)     | 662.5 (565.8 to 784.3)     | 598.0 (465.4 to 790.4)     | -0.7 (-2.0 to 0.9)                             | -9.2 (-25.4 to 13.9)                |
| Haiti                              | 659.2 (557.5 to 768.2)     | 635.7 (555.4 to 730.2)     | 618.7 (527.7 to 728.2)     | 499.4 (419.7 to 597.0)     | -1.6 (-2.2 to -1.0)                            | -21.5 (-28.6 to -14.2)              |

|                                               | Estimate in 2000 (95% UIs) | Estimate in 2015 (95% UIs) | Estimate in 2017 (95% UIs) | Estimate in 2020 (95% UIs) | Annualised rate of change, 2015-2020 (95% UIs) | Percent change, 2015-2020 (95% UIs) |
|-----------------------------------------------|----------------------------|----------------------------|----------------------------|----------------------------|------------------------------------------------|-------------------------------------|
| Jamaica                                       | 358.1 (303.4 to 418.5)     | 321.1 (277.7 to 367.3)     | 324.0 (275.4 to 378.6)     | 324.5 (289.9 to 405.1)     | 0.0 (-0.9 to 1.3)                              | 1.0 (-13.0 to 21.9)                 |
| Puerto Rico                                   | 579.9 (489.5 to 674.1)     | 597.2 (513.6 to 685.7)     | 595.2 (502.2 to 705.3)     | 530.4 (421.8 to 668.9)     | -0.8 (-1.9 to 0.3)                             | -10.7 (-25.0 to 5.0)                |
| Saint Lucia                                   | 543.5 (461.0 to 631.8)     | 498.7 (435.4 to 569.9)     | 503.0 (432.2 to 592.8)     | 486.6 (398.0 to 590.6)     | -0.2 (-1.1 to 0.8)                             | -2.5 (-15.1 to 13.1)                |
| Saint Vincent and the Grenadines              | 481.1 (400.7 to 569.5)     | 436.6 (378.5 to 500.1)     | 436.9 (370.6 to 510.2)     | 438.4 (341.5 to 535.8)     | -0.2 (-1.2 to 1.1)                             | -1.9 (-15.9 to 17.2)                |
| Suriname                                      | 661.1 (563.8 to 771.8)     | 615.4 (538.0 to 701.7)     | 618.8 (528.4 to 725.5)     | 603.1 (503.7 to 722.3)     | -0.1 (-0.8 to 0.6)                             | -2.0 (-11.8 to 7.7)                 |
| Trinidad and Tobago                           | 473.1 (400.6 to 556.4)     | 452.6 (391.5 to 521.9)     | 450.5 (381.4 to 530.7)     | 411.2 (333.7 to 514.8)     | -0.7 (-1.6 to 0.4)                             | -9.2 (-21.5 to 6.8)                 |
| Virgin Islands, U.S.                          | 502.6 (429.9 to 585.5)     | 498.1 (437.6 to 564.2)     | 501.1 (432.0 to 583.6)     | 409.6 (334.4 to 497.2)     | -1.3 (-2.3 to -0.4)                            | -17.8 (-29.5 to -5.8)               |
| <b>Central Latin America</b>                  |                            |                            |                            |                            |                                                |                                     |
| Colombia                                      | 962.3 (781.7 to 1144.5)    | 908.6 (752.7 to 1096.2)    | 902.2 (724.5 to 1095.5)    | 796.7 (601.6 to 1029.2)    | -0.9 (-1.9 to 0.1)                             | -12.4 (-24.9 to 1.5)                |
| Costa Rica                                    | 663.9 (557.0 to 783.9)     | 645.3 (557.6 to 759.5)     | 645.3 (537.2 to 773.1)     | 587.4 (468.8 to 715.1)     | -0.7 (-1.5 to -0.0)                            | -10.2 (-20.1 to -0.4)               |
| El Salvador                                   | 770.2 (638.1 to 944.9)     | 762.0 (656.9 to 909.7)     | 770.7 (648.0 to 932.6)     | 707.4 (559.5 to 902.8)     | -0.5 (-1.6 to 0.6)                             | -7.3 (-21.3 to 8.7)                 |
| Guatemala                                     | 1251.1 (1048.3 to 1481.4)  | 1131.5 (964.4 to 1312.8)   | 1129.2 (953.4 to 1334.2)   | 1028.8 (832.7 to 1290.4)   | -0.7 (-1.6 to 0.4)                             | -9.1 (-20.8 to 6.3)                 |
| Honduras                                      | 898.9 (748.7 to 1077.4)    | 894.0 (751.8 to 1042.5)    | 898.3 (746.9 to 1076.8)    | 799.4 (634.4 to 980.2)     | -0.8 (-1.5 to -0.1)                            | -10.7 (-19.9 to -0.8)               |
| Mexico                                        | 896.6 (752.2 to 1050.2)    | 819.2 (706.8 to 946.4)     | 881.0 (751.8 to 1030.0)    | 863.1 (708.5 to 1048.1)    | 0.3 (-0.5 to 1.2)                              | 5.3 (-6.9 to 19.6)                  |
| Nicaragua                                     | 545.6 (465.9 to 647.9)     | 540.9 (463.8 to 628.0)     | 541.0 (458.4 to 638.0)     | 488.1 (395.7 to 614.6)     | -0.7 (-1.6 to 0.3)                             | -9.8 (-21.7 to 5.0)                 |
| Panama                                        | 533.0 (441.6 to 634.1)     | 522.7 (437.9 to 609.5)     | 520.7 (430.2 to 623.7)     | 514.9 (402.1 to 646.5)     | -0.1 (-1.1 to 0.9)                             | -1.6 (-14.6 to 13.8)                |
| Venezuela                                     | 690.6 (573.4 to 813.5)     | 627.3 (534.9 to 743.0)     | 621.2 (520.3 to 752.0)     | 620.3 (488.8 to 800.3)     | -0.1 (-1.1 to 1.1)                             | -1.2 (-16.8 to 17.5)                |
| <b>Tropical Latin America</b>                 |                            |                            |                            |                            |                                                |                                     |
| Brazil                                        | 1319.2 (1108.0 to 1550.5)  | 1235.5 (1059.2 to 1438.1)  | 1259.3 (1065.2 to 1486.2)  | 1161.5 (935.4 to 1411.2)   | -0.4 (-1.2 to 0.4)                             | -6.1 (-16.5 to 5.5)                 |
| Paraguay                                      | 1069.5 (886.5 to 1286.7)   | 996.8 (837.0 to 1177.0)    | 996.3 (833.3 to 1203.2)    | 962.0 (741.1 to 1236.6)    | -0.3 (-1.5 to 0.9)                             | -3.5 (-19.6 to 14.6)                |
| <b>North Africa and Middle East</b>           |                            |                            |                            |                            |                                                |                                     |
| <b>North Africa and Middle East</b>           |                            |                            |                            |                            |                                                |                                     |
| Alghanistan                                   | 3025.8 (2448.0 to 3701.1)  | 2735.5 (2310.8 to 3231.6)  | 2722.6 (2263.8 to 3298.7)  | 2227.9 (1788.6 to 2750.3)  | -1.4 (-2.1 to -0.8)                            | -18.6 (-26.7 to -10.8)              |
| Algeria                                       | 1611.0 (1342.1 to 1942.8)  | 1421.5 (1214.0 to 1658.3)  | 1428.5 (1197.5 to 1700.6)  | 1742.9 (1956.9 to 1410.8)  | 1.3 (-1.9 to 0.7)                              | 17.4 (-24.7 to -10.0)               |
| Bahrain                                       | 1593.0 (1352.3 to 1899.6)  | 1687.7 (1433.1 to 1960.4)  | 1698.4 (1406.8 to 2032.6)  | 1449.4 (1112.3 to 1871.4)  | -1.1 (-2.4 to 0.4)                             | -14.2 (-29.9 to 6.0)                |
| Egypt                                         | 6474.8 (5628.7 to 7468.3)  | 6413.6 (5741.8 to 7266.2)  | 6450.1 (5660.0 to 7491.5)  | 5508.9 (4711.6 to 6470.1)  | -1.0 (-1.7 to -0.4)                            | -14.2 (-22.5 to -5.8)               |
| Iran                                          | 938.1 (789.6 to 1096.4)    | 1040.7 (901.1 to 1188.0)   | 1049.2 (899.2 to 1222.6)   | 924.6 (764.1 to 1111.0)    | -0.8 (-1.6 to -0.0)                            | -11.2 (-21.5 to -0.6)               |
| Iraq                                          | 1299.0 (1049.6 to 1580.4)  | 1253.3 (1037.3 to 1458.4)  | 1264.0 (1038.5 to 1504.9)  | 1024.9 (828.0 to 1248.0)   | -1.4 (-2.0 to -0.7)                            | -18.3 (-25.8 to -9.6)               |
| Jordan                                        | 1585.8 (1312.6 to 1868.9)  | 1608.2 (1348.2 to 1887.7)  | 1611.1 (1329.2 to 1939.1)  | 1382.1 (1098.8 to 1730.2)  | -1.0 (-1.8 to -0.2)                            | -14.2 (-24.0 to -2.9)               |
| Kuwait                                        | 1130.9 (951.4 to 1346.4)   | 1132.9 (954.5 to 1326.5)   | 1138.5 (980.5 to 1358.0)   | 1149.5 (980.4 to 1676.1)   | 0.0 (-2.2 to 2.4)                              | 1.4 (-27.7 to 43.3)                 |
| Lebanon                                       | 1736.6 (1458.3 to 2059.3)  | 1791.5 (1534.3 to 2084.5)  | 1800.9 (1510.6 to 2144.8)  | 1582.6 (1245.3 to 2001.2)  | -0.9 (-2.0 to 0.3)                             | -11.7 (-25.4 to 4.5)                |
| Libya                                         | 1678.9 (1410.0 to 1971.1)  | 1779.8 (1537.6 to 2056.0)  | 1801.0 (1529.3 to 2127.6)  | 1691.0 (1377.9 to 2020.0)  | -0.4 (-1.1 to 0.4)                             | -5.0 (-15.8 to 5.6)                 |
| Morocco                                       | 1688.7 (1414.9 to 1993.2)  | 1602.1 (1344.6 to 1861.8)  | 1610.5 (1331.7 to 1916.1)  | 1374.6 (1120.9 to 1649.1)  | -1.0 (-1.6 to -0.5)                            | -14.2 (-21.2 to -7.4)               |
| Palestine                                     | 1572.0 (1290.4 to 1861.1)  | 1505.3 (1257.4 to 1733.0)  | 1490.8 (1213.5 to 1759.8)  | 1491.9 (1095.0 to 2144.3)  | -0.1 (-1.7 to 2.1)                             | -1.0 (-22.4 to 36.2)                |
| Oman                                          | 1482.9 (1200.0 to 1764.2)  | 1497.4 (1256.7 to 1764.0)  | 1501.2 (1241.7 to 1809.6)  | 1348.4 (1040.0 to 1727.4)  | -0.7 (-1.9 to 0.5)                             | -10.0 (-24.4 to 7.7)                |
| Qatar                                         | 2056.9 (1700.6 to 2446.9)  | 2202.6 (1874.9 to 2553.4)  | 2228.0 (1846.4 to 2658.4)  | 1946.3 (1432.3 to 2631.6)  | -0.9 (-2.4 to 0.7)                             | -11.7 (-30.0 to 11.2)               |
| Saudi Arabia                                  | 2016.8 (1669.0 to 2345.7)  | 2058.6 (1766.5 to 2386.4)  | 2067.7 (1742.8 to 2443.0)  | 1804.2 (1399.5 to 2273.8)  | -0.9 (-2.2 to 0.3)                             | -12.4 (-28.1 to 4.2)                |
| Sudan                                         | 3667.6 (2915.6 to 4545.5)  | 3115.8 (2615.8 to 3651.4)  | 3112.6 (2578.9 to 3727.8)  | 2842.2 (2303.0 to 3465.2)  | -0.6 (-1.3 to 0.0)                             | -8.8 (-17.6 to 0.0)                 |
| Syria                                         | 1507.3 (1263.2 to 1787.1)  | 1527.5 (1302.8 to 1778.6)  | 1550.6 (1285.2 to 1846.7)  | 1350.6 (1116.0 to 1714.8)  | -0.6 (-1.5 to 0.3)                             | -8.7 (-20.6 to 4.9)                 |
| Tunisia                                       | 1046.0 (855.5 to 1246.5)   | 1032.5 (877.0 to 1212.0)   | 1035.8 (868.2 to 1223.4)   | 879.7 (713.8 to 1080.1)    | -1.1 (-1.8 to -0.5)                            | -14.9 (-23.3 to -6.6)               |
| Turkey                                        | 1305.4 (1095.5 to 1545.1)  | 1264.3 (1059.2 to 1450.1)  | 1272.8 (1059.2 to 1494.9)  | 1113.6 (871.6 to 1393.3)   | -0.9 (-2.0 to 0.2)                             | -12.0 (-26.1 to 3.0)                |
| United Arab Emirates                          | 1418.7 (1148.2 to 1712.8)  | 1433.5 (1212.7 to 1710.1)  | 1444.5 (1201.1 to 1759.7)  | 1272.8 (1023.7 to 1607.0)  | -0.8 (-1.7 to 0.1)                             | -11.5 (-22.4 to 1.1)                |
| Yemen                                         | 2545.9 (2084.5 to 3077.4)  | 2216.8 (1883.6 to 2605.7)  | 2230.8 (1867.7 to 2662.3)  | 1977.7 (1630.9 to 2408.1)  | -0.8 (-1.4 to -0.1)                            | -10.8 (-19.1 to -2.1)               |
| <b>South Asia</b>                             |                            |                            |                            |                            |                                                |                                     |
| <b>South Asia</b>                             |                            |                            |                            |                            |                                                |                                     |
| Bangladesh                                    | 1797.3 (1503.9 to 2107.8)  | 1666.3 (1432.5 to 1918.9)  | 1667.0 (1408.4 to 1970.6)  | 1114.1 (911.7 to 1364.7)   | -2.7 (-3.5 to -1.8)                            | -33.2 (-41.2 to -24.0)              |
| Bhutan                                        | 1706.5 (1441.0 to 2029.2)  | 1738.2 (1475.8 to 2009.0)  | 1737.1 (1450.9 to 2068.5)  | 1126.8 (928.6 to 1360.8)   | -2.9 (-3.5 to -2.2)                            | -35.2 (-40.9 to -28.3)              |
| India                                         | 1077.9 (881.2 to 1295.7)   | 1151.1 (956.0 to 1370.4)   | 1141.4 (938.0 to 1376.6)   | 682.2 (543.0 to 844.5)     | -3.5 (-4.3 to -2.8)                            | -40.8 (-47.4 to -33.9)              |
| Nepal                                         | 1043.0 (856.8 to 1225.9)   | 932.5 (804.0 to 1074.5)    | 929.9 (785.9 to 1099.6)    | 676.0 (565.1 to 809.5)     | -2.2 (-2.7 to -1.6)                            | -27.5 (-33.5 to -21.0)              |
| Pakistan                                      | 1781.5 (1515.0 to 2081.9)  | 1604.9 (1399.7 to 1814.7)  | 1597.3 (1366.3 to 1854.5)  | 1092.9 (909.9 to 1305.3)   | -2.6 (-3.4 to -1.8)                            | -31.9 (-39.6 to -23.3)              |
| <b>Southeast Asia, East Asia, and Oceania</b> |                            |                            |                            |                            |                                                |                                     |
| <b>East Asia</b>                              |                            |                            |                            |                            |                                                |                                     |
| China                                         | 4087.5 (3459.1 to 4778.7)  | 3560.2 (3106.6 to 4106.6)  | 3389.1 (2900.1 to 3986.3)  | 3030.6 (2450.8 to 3767.8)  | -1.1 (-2.1 to -0.0)                            | -14.9 (-27.1 to -0.4)               |
| North Korea                                   | 4713.3 (3935.1 to 5560.9)  | 4378.5 (3758.6 to 5090.8)  | 4399.0 (3669.5 to 5230.4)  | 4272.6 (3492.1 to 5128.8)  | -0.2 (-0.8 to 0.4)                             | -2.5 (-11.8 to 7.0)                 |
| Taiwan (Province of China)                    | 5156.9 (4495.3 to 5900.9)  | 5265.2 (4458.6 to 6042.1)  | 5265.2 (4458.6 to 6210.3)  | 5744.8 (4770.3 to 6988.1)  | 0.5 (-0.4 to 1.5)                              | 8.2 (-5.5 to 24.8)                  |
| <b>Oceania</b>                                |                            |                            |                            |                            |                                                |                                     |
| American Samoa                                | 2901.9 (2444.5 to 3396.2)  | 2935.3 (2544.7 to 3397.6)  | 2919.3 (2478.1 to 3454.5)  | 2559.7 (2128.3 to 3090.4)  | -0.9 (-1.6 to -0.3)                            | -12.8 (-21.8 to -3.7)               |
| Federated States of Micronesia                | 3257.2 (2701.3 to 3956.7)  | 3412.1 (2906.6 to 4040.1)  | 3464.3 (2907.0 to 4171.4)  | 3273.6 (2578.8 to 4262.7)  | -0.3 (-1.5 to 0.9)                             | -4.2 (-19.7 to 14.2)                |
| Fiji                                          | 1929.4 (1589.4 to 2335.0)  | 1890.7 (1614.5 to 2243.2)  | 1890.7 (1584.5 to 2247.3)  | 1733.5 (1399.5 to 2247.3)  | -0.6 (-1.8 to 0.8)                             | -8.7 (-23.8 to 13.1)                |
| Guam                                          | 3738.1 (3181.3 to 4426.4)  | 3669.5 (3197.4 to 4192.6)  | 3657.9 (3122.5 to 4273.6)  | 3083.2 (2472.7 to 3831.3)  | -1.2 (-2.2 to -0.2)                            | -16.0 (-28.6 to -2.5)               |
| Kiribati                                      | 3588.5 (2948.5 to 4349.5)  | 3591.6 (3030.8 to 4385.1)  | 3597.8 (2971.4 to 4409.5)  | 3170.3 (2560.1 to 3981.0)  | -0.8 (-1.5 to -0.2)                            | -11.8 (-19.6 to -3.1)               |
| Marshall Islands                              | 4108.7 (3432.0 to 4887.6)  | 4078.7 (3488.8 to 4761.0)  | 4122.0 (3478.6 to 4930.5)  | 3408.0 (2705.1 to 4251.1)  | -1.2 (-2.2 to -0.4)                            | -16.5 (-28.4 to -5.8)               |
| Northern Mariana Islands                      | 3776.3 (3227.1 to 4396.0)  | 3822.1 (3355.5 to 4378.9)  | 3777.1 (3222.4 to 4428.4)  | 3125.7 (2585.5 to 3753.4)  | -1.4 (-2.1 to -0.6)                            | -18.3 (-26.8 to -9.1)               |
| Papua New Guinea                              | 3258.0 (2599.4 to 4079.3)  | 3193.8 (2588.9 to 4009.6)  | 3211.0 (2514.8 to 4065.6)  | 2650.8 (2003.9 to 3427.7)  | -1.3 (-2.0 to -0.6)                            | -17.1 (-25.9 to -8.9)               |
| Samoa                                         | 2756.6 (2335.3 to 3263.4)  | 2851.8 (2454.9 to 3369.1)  | 2834.8 (2385.5 to 3392.5)  | 2487.2 (2073.7 to 3021.0)  | -0.9 (-1.5 to -0.4)                            | -12.9 (-19.8 to -5.4)               |
| Solomon Islands                               | 3634.2 (2985.1 to 4485.1)  | 3498.4 (2905.8 to 4324.4)  | 3498.4 (2825.6 to 4395.3)  | 2999.9 (2360.3 to 3866.4)  | -1.0 (-1.8 to -0.3)                            | -14.3 (-23.8 to -4.5)               |
| Tonga                                         | 4644.5 (3890.2 to 5477.6)  | 4735.3 (4103.1 to 5520.6)  | 4745.3 (4010.5 to 5660.7)  | 4258.2 (3507.3 to 5138.2)  | -0.7 (-1.3 to -0.2)                            | -10.1 (-17.9 to -2.5)               |
| Vanuatu                                       | 4268.4 (3477.2 to 5133.1)  | 4331.6 (3597.9 to 5166.1)  | 4341.8 (3579.5 to 5306.6)  | 3734.5 (2976.1 to 4613.6)  | -1.0 (-1.6 to -0.4)                            | -13.9 (-21.9 to -5.4)               |
| <b>Southeast Asia</b>                         |                            |                            |                            |                            |                                                |                                     |
| Cambodia                                      | 5651.2 (4780.4 to 6640.0)  | 5323.8 (4647.1 to 6076.8)  | 5360.8 (4587.6 to 6270.8)  | 3544.7 (2984.9 to 4219.7)  | -2.7 (-3.3 to -2.1)                            | -33.4 (-39.4 to -26.8)              |
| Indonesia                                     | 2565.7 (2187.6 to 2988.9)  | 2501.2 (2173.8 to 2942.4)  | 2501.2 (2149.1 to 2945.0)  | 1762.3 (1475.3 to 2104.2)  | -2.3 (-3.0 to -1.7)                            | -29.6 (-36.6 to -22.4)              |
| Laos                                          | 3343.2 (2735.9 to 3947.7)  | 2944.2 (2527.9 to 3438.2)  | 2963.4 (2491.1 to 3536.5)  | 2020.6 (1661.8 to 2431.8)  | -2.5 (-3.1 to -2.0)                            | -31.4 (-41.2 to -25.6)              |
| Malaysia                                      | 1205.2 (1043.8 to 1388.6)  | 1215.0 (1071.4 to 1379.3)  | 1221.2 (1051.1 to 1430.8)  | 993.8 (827.0 to 1197.9)    | -1.4 (-2.1 to -0.5)                            | -18.3 (-27.4 to -7.1)               |
| Maldives                                      | 1359.6 (1144.2 to 1598.3)  | 1435.9 (1197.9 to 1676.9)  | 1440.0 (1193.1 to 1714.1)  | 1294.1 (904.0 to 1794.3)   | -0.8 (-2.6 to 1.2)                             | -9.9 (-32.4 to 19.7)                |
| Mauritius                                     | 2048.5 (1712.5 to 2455.7)  | 2100.9 (1777.6 to 2454.8)  | 2113.0 (1752.7 to 2541.4)  | 1805.7 (1427.6 to 2293.5)  | -1.0 (-2.1 to -0.1)                            | -14.1 (-26.6 to -1.4)               |
| Myanmar                                       | 3488.3 (2887.4 to 4213.0)  | 3399.6 (2903.4 to 3950.3)  | 3462.7 (2882.3 to 4117.6)  | 2271.8 (1870.0 to 2758.9)  | -2.7 (-3.5 to -1.9)                            | -33.2 (-40.4 to -25.1)              |
| Philippines                                   | 2808.0 (2313.9 to 3455.4)  | 2801.2 (2393.3 to 3279.2)  | 2809.0 (2345.5 to 3351.7)  | 2042.9 (1667.1 to 2488.1)  | -2.1 (-2.8 to -1.5)                            | -27.1 (-34.2 to -19.6)              |
| Sri Lanka                                     | 1807.4 (1516.5 to 2131.2)  | 1653.5 (1436.7 to 1889.3)  | 1658.4 (1400.2 to 1951.9)  | 1219.3 (971.2 to 1518.8)   | -2.1 (-3.2 to -0.9)                            | -26.3 (-38.1 to -13.2)              |
| Seychelles                                    | 2144.8 (1775.8 to 2544.8)  | 2275.6 (1959.6 to 2636.7)  | 2303.8 (1940.2 to 2744.3)  | 1566.8 (1262.6 to 1935.4)  | -2.5 (-3.5 to -1.5)                            | -31.2 (-41.2 to -19.6)              |
| Thailand                                      | 2805.2 (2364.8 to 3350.3)  | 2966.8 (2550.9 to 3422.0)  | 2933.9 (2471.3 to 3459.6)  | 2782.4 (2119.9 to 3778.8)  | -0.5 (-2.0 to 1.3)                             | -6.3 (-25.9 to 21.7)                |

|                                                                                                             | Estimate in 2000 (95% UIs) | Estimate in 2015 (95% UIs) | Estimate in 2017 (95% UIs) | Estimate in 2030 (95% UIs) | Annualised rate of change, 2015-2030 (95% UIs) | Percent change, 2015-2030 (95% UIs) |
|-------------------------------------------------------------------------------------------------------------|----------------------------|----------------------------|----------------------------|----------------------------|------------------------------------------------|-------------------------------------|
| Timor-Leste                                                                                                 | 2537.0 (2118.1 to 2985.9)  | 2318.9 (1989.3 to 2694.8)  | 2307.2 (1925.1 to 2737.8)  | 1690.2 (1365.7 to 2072.7)  | -2.1 (-3.0 to -1.2)                            | -27.1 (-36.0 to -16.3)              |
| Vietnam                                                                                                     | 3141.7 (2652.9 to 3678.9)  | 3223.0 (2796.0 to 3675.1)  | 3203.6 (2705.8 to 3763.0)  | 2271.6 (1909.5 to 2688.9)  | -2.3 (-2.9 to -1.7)                            | -29.6 (-35.7 to -22.3)              |
| <b>Sub-Saharan Africa</b>                                                                                   |                            |                            |                            |                            |                                                |                                     |
| <b>Central Sub-Saharan Africa</b>                                                                           |                            |                            |                            |                            |                                                |                                     |
| Angola                                                                                                      | 3528.2 (2838.0 to 4398.6)  | 3340.0 (2750.9 to 4098.8)  | 3386.7 (2766.3 to 4227.9)  | 2524.3 (1958.5 to 3280.7)  | -1.9 (-2.9 to -0.8)                            | -24.5 (-35.1 to -11.7)              |
| Central African Republic                                                                                    | 2976.7 (2254.6 to 3793.2)  | 2837.5 (2239.2 to 3581.2)  | 2837.0 (2240.8 to 3649.9)  | 2546.1 (1852.1 to 3401.9)  | -0.8 (-2.1 to 0.6)                             | -10.2 (-27.5 to 8.7)                |
| Congo                                                                                                       | 2938.7 (2399.6 to 3586.8)  | 2761.0 (2262.8 to 3344.6)  | 2720.0 (2183.6 to 3348.5)  | 2188.6 (1618.7 to 2920.1)  | -1.6 (-3.0 to 0.1)                             | -20.8 (-35.8 to 1.7)                |
| Democratic Republic of the Congo                                                                            | 3269.4 (2606.0 to 4102.6)  | 3012.4 (2460.8 to 3654.4)  | 3017.2 (2433.9 to 3728.1)  | 2398.6 (1867.8 to 3087.2)  | -1.5 (-2.4 to -0.6)                            | -20.5 (-29.9 to -9.0)               |
| Equatorial Guinea                                                                                           | 2651.8 (2074.2 to 3277.0)  | 2804.8 (2311.1 to 3365.3)  | 2784.6 (2260.9 to 3408.3)  | 2083.4 (1610.1 to 2690.6)  | -2.0 (-3.1 to -0.8)                            | -25.7 (-37.5 to -11.0)              |
| Gabon                                                                                                       | 2805.8 (2271.3 to 3453.9)  | 2590.1 (2173.1 to 3073.5)  | 2592.1 (2142.0 to 3114.9)  | 1906.4 (1501.3 to 2436.5)  | -2.1 (-3.1 to -0.9)                            | -26.4 (-37.6 to -12.7)              |
| <b>Eastern Sub-Saharan Africa</b>                                                                           |                            |                            |                            |                            |                                                |                                     |
| Burundi                                                                                                     | 2627.9 (2221.6 to 3096.7)  | 2401.8 (2054.6 to 2802.8)  | 2396.7 (2008.2 to 2867.7)  | 1989.7 (1585.9 to 2528.4)  | -1.3 (-2.4 to -0.1)                            | -17.2 (-30.0 to -1.2)               |
| Comoros                                                                                                     | 2012.5 (1649.2 to 2422.7)  | 1879.0 (1590.8 to 2199.2)  | 1871.1 (1549.8 to 2250.3)  | 1533.2 (1225.6 to 1913.6)  | -1.4 (-2.3 to -0.5)                            | -18.5 (-28.7 to -6.6)               |
| Djibouti                                                                                                    | 2201.9 (1817.2 to 2610.1)  | 2094.3 (1776.7 to 2444.1)  | 2130.2 (1792.6 to 2543.6)  | 1762.8 (1401.0 to 2271.7)  | -1.2 (-2.3 to -0.0)                            | -15.9 (-29.7 to -0.2)               |
| Eritrea                                                                                                     | 3311.1 (2731.7 to 3944.4)  | 2993.9 (2539.7 to 3509.1)  | 2993.9 (2498.9 to 3593.2)  | 2692.1 (2198.5 to 3248.8)  | -0.7 (-1.9 to 0.2)                             | -10.0 (-25.0 to 3.6)                |
| Ethiopia                                                                                                    | 3569.3 (2991.2 to 4248.1)  | 3291.6 (2786.4 to 3876.1)  | 3271.0 (2732.7 to 3907.8)  | 2390.1 (1944.1 to 2986.6)  | -2.2 (-2.9 to -1.3)                            | -27.4 (-35.6 to -17.6)              |
| Kenya                                                                                                       | 2127.9 (1782.6 to 2513.0)  | 2018.2 (1720.9 to 2358.7)  | 1905.9 (1603.2 to 2279.0)  | 1505.9 (1186.5 to 2039.8)  | -1.8 (-2.9 to -0.3)                            | -23.3 (-35.7 to -4.2)               |
| Madagascar                                                                                                  | 3297.6 (2679.2 to 4109.0)  | 2964.0 (2459.4 to 3537.6)  | 2990.2 (2436.4 to 3658.4)  | 2420.5 (1935.1 to 3004.3)  | -1.4 (-2.0 to -0.8)                            | -18.4 (-25.9 to -11.3)              |
| Malawi                                                                                                      | 3422.3 (2849.9 to 4048.6)  | 3074.9 (2624.8 to 3600.2)  | 3088.5 (2583.5 to 3699.8)  | 2644.8 (2006.3 to 3453.2)  | -1.0 (-2.4 to 0.4)                             | -14.0 (-30.5 to 6.9)                |
| Mozambique                                                                                                  | 3548.6 (2988.7 to 4247.4)  | 2972.9 (2565.5 to 3430.2)  | 2942.8 (2487.1 to 3469.7)  | 2560.9 (2044.5 to 3240.1)  | -1.0 (-2.1 to 0.1)                             | -13.9 (-27.1 to 1.5)                |
| Rwanda                                                                                                      | 2806.8 (2358.2 to 3533.2)  | 2819.4 (2362.0 to 3375.1)  | 2843.2 (2346.4 to 3459.2)  | 2190.3 (1527.1 to 3147.5)  | -1.8 (-3.8 to 0.8)                             | -22.4 (-43.5 to -7.8)               |
| Somalia                                                                                                     | 3374.2 (2767.6 to 4061.1)  | 3367.1 (2780.0 to 4037.1)  | 3366.3 (2780.9 to 4100.1)  | 3051.0 (2382.5 to 3740.3)  | -0.9 (-1.9 to 0.0)                             | -12.4 (-24.7 to 0.2)                |
| South Sudan                                                                                                 | 2829.1 (2312.9 to 3418.5)  | 2808.2 (2362.8 to 3289.2)  | 2731.0 (2248.2 to 3283.2)  | 2316.6 (1744.7 to 3025.0)  | -1.3 (-2.5 to 0.1)                             | -17.6 (-31.2 to 1.1)                |
| Tanzania                                                                                                    | 2360.0 (1976.2 to 2841.1)  | 2196.5 (1893.2 to 2510.8)  | 2187.4 (1844.0 to 2560.2)  | 1795.4 (1474.3 to 2176.1)  | -1.4 (-2.2 to -0.5)                            | -18.3 (-27.6 to -7.8)               |
| Uganda                                                                                                      | 2908.4 (2374.4 to 3539.4)  | 2516.1 (2136.7 to 2953.8)  | 2511.3 (2083.5 to 2995.2)  | 2155.1 (1625.9 to 2716.1)  | -1.1 (-2.4 to 0.0)                             | -15.2 (-29.8 to 0.6)                |
| Zambia                                                                                                      | 3323.8 (2674.3 to 3864.6)  | 2959.6 (2550.6 to 3450.0)  | 2981.5 (2533.0 to 3543.9)  | 2371.2 (1670.2 to 3205.4)  | -1.5 (-3.6 to 0.1)                             | -19.9 (-41.4 to 2.3)                |
| <b>Southern Sub-Saharan Africa</b>                                                                          |                            |                            |                            |                            |                                                |                                     |
| Botswana                                                                                                    | 1980.0 (1644.4 to 2369.8)  | 1998.4 (1686.2 to 2362.5)  | 2026.8 (1676.0 to 2442.8)  | 2030.4 (1461.4 to 3084.3)  | 0.0 (-1.7 to 2.7)                              | 1.5 (-22.1 to 49.6)                 |
| Lesotho                                                                                                     | 2699.0 (2176.3 to 3235.9)  | 2314.6 (1922.7 to 2787.2)  | 2318.6 (1901.7 to 2860.4)  | 2345.8 (1617.9 to 3280.4)  | -0.0 (-2.1 to 2.2)                             | 1.2 (-21.7 to 38.2)                 |
| Namibia                                                                                                     | 1623.0 (1332.4 to 1970.3)  | 1481.7 (1255.6 to 1754.5)  | 1485.1 (1234.1 to 1806.1)  | 1165.9 (886.4 to 1523.8)   | -1.6 (-2.8 to -0.3)                            | -21.1 (-34.6 to -4.3)               |
| South Africa                                                                                                | 2047.8 (1702.5 to 2467.4)  | 1460.7 (1204.0 to 1744.2)  | 1438.9 (1176.2 to 1746.2)  | 1554.9 (916.3 to 2708.1)   | 0.2 (-2.7 to 3.8)                              | 6.3 (-33.2 to 77.7)                 |
| Swaziland                                                                                                   | 2801.6 (2329.7 to 3298.8)  | 2736.7 (2344.0 to 3225.3)  | 2799.3 (2344.7 to 3332.2)  | 2847.3 (1953.2 to 4411.2)  | 0.2 (-2.0 to 2.9)                              | 4.0 (-25.4 to 54.5)                 |
| Zimbabwe                                                                                                    | 3860.8 (3208.3 to 4629.6)  | 3567.2 (2995.6 to 4254.2)  | 3593.4 (2976.7 to 4374.2)  | 4070.9 (2489.9 to 7168.9)  | 0.7 (-2.3 to 4.4)                              | 14.1 (-28.8 to 93.0)                |
| <b>Western Sub-Saharan Africa</b>                                                                           |                            |                            |                            |                            |                                                |                                     |
| Benin                                                                                                       | 5288.5 (4366.9 to 6338.0)  | 4907.3 (4122.6 to 5775.5)  | 4949.5 (4089.2 to 5972.8)  | 3934.5 (3115.7 to 4926.4)  | -1.5 (-2.4 to -0.6)                            | -19.9 (-29.9 to -8.5)               |
| Burkina Faso                                                                                                | 6261.7 (5178.5 to 7400.9)  | 5553.0 (4725.6 to 6470.3)  | 5538.2 (4650.3 to 6575.0)  | 4500.6 (3584.1 to 5505.6)  | -1.4 (-2.3 to -0.6)                            | -19.0 (-29.1 to -9.0)               |
| Cameroon                                                                                                    | 6025.1 (5040.9 to 7197.9)  | 5478.3 (4593.8 to 6392.6)  | 5527.1 (4555.3 to 6661.4)  | 4542.8 (3557.5 to 5753.7)  | -1.3 (-2.2 to -0.1)                            | -17.1 (-28.6 to -0.9)               |
| Cape Verde                                                                                                  | 3884.4 (3119.1 to 4753.2)  | 3599.1 (3068.1 to 4263.4)  | 3631.1 (3036.4 to 4376.6)  | 2948.8 (2362.6 to 3709.1)  | -1.3 (-2.4 to -0.5)                            | -18.1 (-30.2 to -6.6)               |
| Chad                                                                                                        | 5487.2 (4496.6 to 6534.2)  | 5281.6 (4308.0 to 6411.4)  | 5243.1 (4122.8 to 6542.1)  | 4457.9 (3368.1 to 5748.1)  | -1.2 (-2.2 to -0.1)                            | -15.7 (-27.7 to -2.0)               |
| Cote d'Ivoire                                                                                               | 4839.6 (3967.1 to 5790.0)  | 4603.9 (3816.2 to 5386.5)  | 4529.3 (3698.6 to 5401.0)  | 3423.1 (2695.8 to 4269.0)  | -2.0 (-2.8 to -1.1)                            | -25.7 (-34.4 to -14.7)              |
| The Gambia                                                                                                  | 5342.1 (4456.5 to 6246.8)  | 5330.2 (4599.5 to 6209.9)  | 5330.2 (4599.5 to 6209.9)  | 4605.2 (3699.4 to 5744.3)  | -1.0 (-1.7 to -0.2)                            | -13.7 (-23.0 to -2.9)               |
| Ghana                                                                                                       | 5195.1 (4292.8 to 6121.0)  | 4731.8 (4087.4 to 5475.8)  | 4731.8 (4087.4 to 5475.8)  | 3590.9 (2836.4 to 4023.9)  | -2.2 (-3.9 to -1.0)                            | -28.4 (-45.0 to -21.5)              |
| Guinea                                                                                                      | 6297.1 (5252.4 to 7483.9)  | 5924.8 (5014.1 to 6920.9)  | 5973.1 (4910.1 to 7157.0)  | 4864.2 (3732.8 to 6180.8)  | -1.3 (-2.5 to -0.2)                            | -17.9 (-30.9 to -3.3)               |
| Guinea-Bissau                                                                                               | 6079.8 (5009.8 to 7315.1)  | 5588.5 (4680.0 to 6503.0)  | 5588.5 (4681.1 to 6725.5)  | 4440.2 (3579.0 to 5433.9)  | -1.5 (-2.2 to -0.8)                            | -20.2 (-28.2 to -10.8)              |
| Liberia                                                                                                     | 6273.7 (5161.8 to 7522.8)  | 5772.7 (4906.1 to 6814.6)  | 5757.6 (4815.4 to 6920.8)  | 4819.9 (3935.1 to 5941.6)  | -1.2 (-2.0 to -0.4)                            | -16.6 (-26.0 to -6.2)               |
| Mali                                                                                                        | 6032.4 (5030.0 to 7200.2)  | 5701.4 (4719.2 to 6867.1)  | 5723.8 (4645.2 to 7088.2)  | 4214.7 (3340.2 to 5248.5)  | -2.0 (-2.7 to -1.3)                            | -26.1 (-33.3 to -17.8)              |
| Mauritania                                                                                                  | 4788.3 (3943.6 to 5681.2)  | 4503.8 (3830.0 to 5225.5)  | 4477.1 (3738.4 to 5374.0)  | 3277.4 (2624.3 to 4112.2)  | -2.1 (-3.1 to -1.1)                            | -27.3 (-37.0 to -15.7)              |
| Niger                                                                                                       | 5985.0 (4891.2 to 7201.6)  | 5417.9 (4500.4 to 6501.8)  | 5424.4 (4485.1 to 6617.4)  | 4134.6 (3354.6 to 5198.7)  | -1.8 (-2.5 to -1.1)                            | -23.7 (-31.5 to -14.9)              |
| Nigeria                                                                                                     | 4942.8 (4218.2 to 5767.5)  | 4595.1 (3945.6 to 5317.8)  | 4575.0 (3866.4 to 5442.8)  | 3710.4 (3075.9 to 4449.1)  | -1.4 (-2.1 to -0.7)                            | -19.3 (-27.5 to -9.6)               |
| Sao Tome and Principe                                                                                       | 7429.7 (6215.2 to 8895.9)  | 6887.3 (5877.5 to 8122.6)  | 6887.3 (5877.5 to 8122.6)  | 5986.6 (4591.0 to 7812.4)  | -1.0 (-2.3 to 0.4)                             | -13.1 (-29.5 to 7.0)                |
| Senegal                                                                                                     | 4865.0 (3989.1 to 5750.5)  | 4371.7 (3704.0 to 5144.1)  | 4379.5 (3597.1 to 5265.9)  | 3571.3 (2878.1 to 4438.3)  | -1.4 (-2.2 to -0.5)                            | -18.4 (-28.1 to -7.5)               |
| Sierra Leone                                                                                                | 6598.4 (5428.1 to 7800.9)  | 5973.1 (5057.5 to 7071.9)  | 5994.1 (4939.2 to 7231.5)  | 5286.9 (4020.5 to 6975.4)  | -0.9 (-2.1 to 0.4)                             | -11.6 (-26.6 to 6.7)                |
| Togo                                                                                                        | 5062.0 (4163.2 to 6100.5)  | 4698.3 (3992.9 to 5548.0)  | 4688.5 (3917.3 to 5644.9)  | 3854.3 (3039.5 to 4881.1)  | -1.3 (-2.3 to -0.2)                            | -18.0 (-29.3 to -3.3)               |
| <b>Indicator 3.3.5: Age-standardised prevalence of the sum of 15 neglected tropical diseases (NTDs) (%)</b> |                            |                            |                            |                            |                                                |                                     |
| <b>Central Europe, Eastern Europe, and Central Asia</b>                                                     |                            |                            |                            |                            |                                                |                                     |
| <b>Central Asia</b>                                                                                         |                            |                            |                            |                            |                                                |                                     |
| Armenia                                                                                                     | 7.8 (6.0 to 10.3)          | 4.4 (3.5 to 5.7)           | 4.3 (3.4 to 5.5)           | 3.3 (2.2 to 5.0)           | -2.1 (-3.9 to -0.1)                            | -25.9 (-44.1 to -1.4)               |
| Azerbaijan                                                                                                  | 9.2 (7.2 to 11.5)          | 4.7 (3.7 to 6.0)           | 4.5 (3.5 to 5.7)           | 3.3 (2.0 to 5.2)           | -2.5 (-4.5 to -0.3)                            | -30.0 (-49.2 to -3.9)               |
| Georgia                                                                                                     | 6.8 (5.2 to 9.0)           | 4.6 (3.5 to 5.9)           | 4.3 (3.2 to 5.6)           | 3.3 (1.9 to 5.0)           | -2.3 (-4.4 to -0.2)                            | -28.5 (-48.6 to -2.5)               |
| Kazakhstan                                                                                                  | 6.1 (4.9 to 7.5)           | 4.3 (3.4 to 5.3)           | 4.2 (3.2 to 5.2)           | 3.5 (2.3 to 5.3)           | -1.6 (-3.2 to 0.4)                             | -20.2 (-38.5 to 5.8)                |
| Kyrgyzstan                                                                                                  | 10.6 (8.1 to 13.7)         | 7.5 (5.9 to 9.6)           | 7.1 (5.5 to 9.1)           | 5.8 (3.9 to 9.0)           | -1.8 (-3.9 to 0.2)                             | -22.9 (-44.2 to 3.6)                |
| Mongolia                                                                                                    | 12.3 (9.5 to 15.3)         | 8.6 (6.9 to 10.6)          | 8.2 (6.5 to 10.1)          | 7.0 (4.6 to 10.1)          | -1.4 (-3.2 to 0.4)                             | -18.5 (-37.9 to 5.7)                |
| Tajikistan                                                                                                  | 25.2 (19.1 to 32.5)        | 14.2 (10.7 to 18.8)        | 13.6 (10.0 to 18.0)        | 9.6 (5.8 to 15.2)          | -2.8 (-4.8 to -0.6)                            | -32.9 (-51.4 to -9.1)               |
| Turkmenistan                                                                                                | 10.6 (8.2 to 13.4)         | 5.6 (4.4 to 7.0)           | 5.1 (4.0 to 6.4)           | 3.5 (2.2 to 5.2)           | -3.3 (-5.3 to -1.1)                            | -38.7 (-54.7 to -15.3)              |
| Uzbekistan                                                                                                  | 11.3 (8.4 to 14.9)         | 6.6 (5.0 to 8.4)           | 6.2 (4.7 to 7.9)           | 4.4 (2.7 to 6.8)           | -2.7 (-4.8 to -0.7)                            | -32.8 (-51.1 to -9.8)               |
| <b>Central Europe</b>                                                                                       |                            |                            |                            |                            |                                                |                                     |
| Albania                                                                                                     | 0.0 (0.0 to 0.0)           | 0.0 (0.0 to 0.0)           | 0.0 (0.0 to 0.0)           | 0.0 (0.0 to 0.0)           | -0.1 (-0.7 to 1.2)                             | -1.2 (-10.6 to 20.2)                |
| Bosnia and Herzegovina                                                                                      | 0.1 (0.1 to 0.1)           | 0.1 (0.1 to 0.1)           | 0.1 (0.1 to 0.1)           | 0.1 (0.1 to 0.1)           | -0.6 (-1.1 to -0.1)                            | -8.3 (-15.5 to -0.9)                |
| Bulgaria                                                                                                    | 0.0 (0.0 to 0.0)           | 0.0 (0.0 to 0.0)           | 0.0 (0.0 to 0.0)           | 0.0 (0.0 to 0.0)           | -0.0 (-0.3 to 0.2)                             | -0.6 (-4.3 to 3.4)                  |
| Croatia                                                                                                     | 0.1 (0.1 to 0.1)           | 0.1 (0.1 to 0.1)           | 0.1 (0.1 to 0.1)           | 0.1 (0.1 to 0.1)           | -0.7 (-1.3 to -0.1)                            | -9.9 (-17.9 to -1.7)                |
| Czech Republic                                                                                              | 0.1 (0.1 to 0.1)           | 0.1 (0.1 to 0.1)           | 0.1 (0.1 to 0.1)           | 0.1 (0.1 to 0.1)           | -0.0 (-0.5 to 0.4)                             | -0.6 (-6.8 to 5.6)                  |
| Hungary                                                                                                     | 0.1 (0.1 to 0.1)           | 0.1 (0.1 to 0.1)           | 0.1 (0.1 to 0.1)           | 0.1 (0.1 to 0.1)           | -0.7 (-1.2 to -0.1)                            | -9.3 (-16.4 to -2.0)                |
| Macedonia                                                                                                   | 0.1 (0.1 to 0.1)           | 0.1 (0.1 to 0.1)           | 0.1 (0.1 to 0.1)           | 0.1 (0.0 to 0.1)           | -0.1 (-0.6 to 0.4)                             | -1.1 (-8.3 to 5.9)                  |
| Montenegro                                                                                                  | 0.1 (0.1 to 0.1)           | 0.1 (0.1 to 0.1)           | 0.1 (0.1 to 0.1)           | 0.1 (0.1 to 0.1)           | 0.7 (0.1 to 1.4)                               | 11.1 (2.2 to 22.8)                  |
| Poland                                                                                                      | 0.1 (0.1 to 0.1)           | 0.1 (0.1 to 0.1)           | 0.1 (0.1 to 0.1)           | 0.1 (0.1 to 0.1)           | -0.6 (-1.1 to -0.0)                            | -8.5 (-15.4 to -0.6)                |
| Romania                                                                                                     | 0.1 (0.1 to 0.1)           | 0.1 (0.1 to 0.1)           | 0.1 (0.1 to 0.1)           | 0.1 (0.1 to 0.1)           | -0.2 (-0.7 to 0.3)                             | -2.8 (-9.3 to 3.9)                  |
| Serbia                                                                                                      | 0.1 (0.1 to 0.1)           | 0.1 (0.1 to 0.1)           | 0.1 (0.1 to 0.1)           | 0.1 (0.1 to 0.1)           | -0.3 (-0.8 to 0.3)                             | -3.9 (-11.3 to 4.8)                 |
| Slovakia                                                                                                    | 0.1 (0.1 to 0.1)           | 0.1 (0.1 to 0.1)           | 0.1 (0.1 to 0.1)           | 0.1 (0.1 to 0.1)           | -0.9 (-1.4 to -0.5)                            | -12.8 (-18.8 to -6.5)               |
| Slovenia                                                                                                    | 0.1 (0.1 to 0.1)           | 0.1 (0.1 to 0.1)           | 0.1 (0.1 to 0.1)           | 0.1 (0.1 to 0.1)           | -0.0 (-0.6 to 0.6)                             | -0.1 (-8.1 to 8.7)                  |
| <b>Eastern Europe</b>                                                                                       |                            |                            |                            |                            |                                                |                                     |

|                                    | Estimate in 2000 (95% UIs) | Estimate in 2015 (95% UIs) | Estimate in 2017 (95% UIs) | Estimate in 2020 (95% UIs) | Annualised rate of change, 2015-2020 (95% UIs) | Percent change, 2015-2020 (95% UIs) |
|------------------------------------|----------------------------|----------------------------|----------------------------|----------------------------|------------------------------------------------|-------------------------------------|
| Belarus                            | 0.1 (0.1 to 0.1)           | 0.1 (0.1 to 0.1)           | 0.1 (0.1 to 0.1)           | 0.1 (0.1 to 0.1)           | -1.2 (-1.6 to -0.8)                            | -16.4 (-21.0 to -11.6)              |
| Estonia                            | 0.1 (0.1 to 0.1)           | 0.1 (0.1 to 0.1)           | 0.1 (0.1 to 0.1)           | 0.1 (0.0 to 0.1)           | -1.5 (-2.0 to -1.1)                            | -20.4 (-25.7 to -14.7)              |
| Latvia                             | 0.1 (0.1 to 0.1)           | 0.1 (0.1 to 0.1)           | 0.1 (0.1 to 0.1)           | 0.1 (0.0 to 0.1)           | -1.6 (-2.1 to -1.1)                            | -21.7 (-27.1 to -15.8)              |
| Lithuania                          | 0.1 (0.1 to 0.1)           | 0.1 (0.1 to 0.1)           | 0.1 (0.1 to 0.1)           | 0.1 (0.0 to 0.1)           | -1.3 (-1.8 to -0.8)                            | -17.9 (-23.9 to -11.2)              |
| Moldova                            | 0.1 (0.1 to 0.1)           | 0.1 (0.1 to 0.1)           | 0.1 (0.1 to 0.1)           | 0.1 (0.1 to 0.1)           | -1.1 (-1.4 to -0.8)                            | -15.3 (-19.3 to -11.4)              |
| Russia                             | 4.8 (4.3 to 5.3)           | 4.7 (4.3 to 5.2)           | 4.7 (4.3 to 5.2)           | 4.7 (4.2 to 5.2)           | -0.0 (-0.1 to 0.0)                             | -0.5 (-1.1 to 0.1)                  |
| Ukraine                            | 0.6 (0.5 to 0.6)           | 0.6 (0.5 to 0.6)           | 0.6 (0.5 to 0.6)           | 0.6 (0.5 to 0.6)           | -0.1 (-0.2 to -0.0)                            | -1.4 (-2.6 to -0.3)                 |
| <b>High-income</b>                 |                            |                            |                            |                            |                                                |                                     |
| <b>Australasia</b>                 |                            |                            |                            |                            |                                                |                                     |
| Australia                          | 0.0 (0.0 to 0.0)           | 0.0 (0.0 to 0.0)           | 0.0 (0.0 to 0.0)           | 0.0 (0.0 to 0.1)           | 0.3 (-2.4 to 4.2)                              | 7.5 (-30.0 to 87.4)                 |
| New Zealand                        | 0.1 (0.0 to 0.1)           | 0.0 (0.0 to 0.1)           | 0.0 (0.0 to 0.1)           | 0.0 (0.0 to 0.1)           | -1.1 (-1.9 to -0.3)                            | -14.7 (-24.8 to -4.9)               |
| <b>High-income Asia Pacific</b>    |                            |                            |                            |                            |                                                |                                     |
| Bhunei                             | 0.1 (0.1 to 0.2)           | 0.4 (0.3 to 0.5)           | 0.3 (0.2 to 0.4)           | 0.7 (0.3 to 2.1)           | 2.5 (-0.4 to 10.8)                             | 60.2 (-6.5 to 408.0)                |
| Japan                              | 0.1 (0.1 to 0.1)           | 0.1 (0.1 to 0.1)           | 0.1 (0.1 to 0.1)           | 0.1 (0.1 to 0.1)           | 0.0 (-0.1 to 0.1)                              | 0.2 (-1.0 to 1.3)                   |
| South Korea                        | 6.2 (5.4 to 7.2)           | 4.8 (4.2 to 5.5)           | 4.7 (4.1 to 5.5)           | 4.4 (3.6 to 5.6)           | -0.6 (-1.4 to 0.5)                             | -7.8 (-19.2 to 7.4)                 |
| Singapore                          | 0.0 (0.0 to 0.1)           | 0.1 (0.1 to 0.2)           | 0.1 (0.1 to 0.2)           | 0.5 (0.2 to 1.5)           | 7.6 (5.5 to 15.5)                              | 241.7 (126.5 to 917.4)              |
| <b>High-income North America</b>   |                            |                            |                            |                            |                                                |                                     |
| Canada                             | 0.0 (0.0 to 0.0)           | 0.0 (0.0 to 0.0)           | 0.0 (0.0 to 0.0)           | 0.0 (0.0 to 0.0)           | -0.5 (-0.8 to -0.2)                            | -6.9 (-11.7 to -2.4)                |
| Greenland                          | 0.0 (0.0 to 0.0)           | 0.0 (0.0 to 0.0)           | 0.0 (0.0 to 0.0)           | 0.0 (0.0 to 0.0)           | 0.1 (-0.2 to 0.4)                              | 1.0 (-2.5 to 5.9)                   |
| United States                      | 0.1 (0.1 to 0.1)           | 0.1 (0.1 to 0.1)           | 0.1 (0.1 to 0.1)           | 0.1 (0.1 to 0.1)           | 0.6 (0.3 to 0.7)                               | 8.8 (4.9 to 11.7)                   |
| <b>Southern Latin America</b>      |                            |                            |                            |                            |                                                |                                     |
| Argentina                          | 9.5 (7.9 to 11.2)          | 6.5 (5.5 to 7.6)           | 6.0 (5.0 to 7.2)           | 4.6 (3.3 to 6.4)           | -2.4 (-3.8 to -0.7)                            | -29.7 (-43.6 to -10.0)              |
| Chile                              | 7.6 (6.3 to 9.2)           | 5.1 (4.3 to 6.2)           | 4.9 (4.0 to 5.9)           | 3.8 (2.8 to 5.4)           | -2.0 (-3.3 to -0.4)                            | -25.5 (-39.5 to -6.2)               |
| Uruguay                            | 1.2 (1.0 to 1.4)           | 0.7 (0.6 to 0.9)           | 0.7 (0.6 to 0.8)           | 0.5 (0.4 to 0.6)           | -2.4 (-2.5 to -2.2)                            | -29.8 (-31.6 to -28.1)              |
| <b>Western Europe</b>              |                            |                            |                            |                            |                                                |                                     |
| Andorra                            | 0.0 (0.0 to 0.0)           | 0.0 (0.0 to 0.0)           | 0.0 (0.0 to 0.0)           | 0.0 (0.0 to 0.1)           | 1.5 (-0.8 to 3.9)                              | 27.3 (-11.1 to 80.1)                |
| Austria                            | 0.0 (0.0 to 0.0)           | 0.0 (0.0 to 0.0)           | 0.0 (0.0 to 0.0)           | 0.0 (0.0 to 0.0)           | -0.6 (-1.1 to -0.1)                            | -9.2 (-15.8 to -1.6)                |
| Belgium                            | 0.0 (0.0 to 0.0)           | 0.0 (0.0 to 0.0)           | 0.0 (0.0 to 0.0)           | 0.0 (0.0 to 0.0)           | 0.7 (0.5 to 1.0)                               | 11.2 (7.0 to 16.1)                  |
| Cyprus                             | 0.0 (0.0 to 0.0)           | 0.0 (0.0 to 0.0)           | 0.0 (0.0 to 0.0)           | 0.0 (0.0 to 0.0)           | 0.3 (0.0 to 0.6)                               | 6.2 (0.7 to 8.9)                    |
| Denmark                            | 0.0 (0.0 to 0.0)           | 0.0 (0.0 to 0.0)           | 0.0 (0.0 to 0.0)           | 0.0 (0.0 to 0.0)           | 1.0 (0.1 to 2.0)                               | 16.5 (1.4 to 34.7)                  |
| Finland                            | 0.0 (0.0 to 0.0)           | 0.0 (0.0 to 0.0)           | 0.0 (0.0 to 0.0)           | 0.0 (0.0 to 0.0)           | -0.4 (-1.3 to 0.5)                             | -6.1 (-17.4 to 7.1)                 |
| France                             | 0.0 (0.0 to 0.0)           | 0.0 (0.0 to 0.0)           | 0.0 (0.0 to 0.0)           | 0.0 (0.0 to 0.0)           | -0.5 (-0.8 to -0.1)                            | -7.2 (-11.8 to -2.1)                |
| Germany                            | 0.0 (0.0 to 0.0)           | 0.0 (0.0 to 0.0)           | 0.0 (0.0 to 0.0)           | 0.0 (0.0 to 0.0)           | -0.4 (-0.8 to -0.0)                            | -5.8 (-11.7 to -0.1)                |
| Greece                             | 0.0 (0.0 to 0.0)           | 0.0 (0.0 to 0.0)           | 0.0 (0.0 to 0.0)           | 0.0 (0.0 to 0.0)           | 3.5 (1.5 to 5.9)                               | 71.4 (25.6 to 143.5)                |
| Iceland                            | 0.0 (0.0 to 0.0)           | 0.0 (0.0 to 0.0)           | 0.0 (0.0 to 0.0)           | 0.0 (0.0 to 0.0)           | 2.9 (0.2 to 6.4)                               | 57.7 (2.4 to 160.9)                 |
| Ireland                            | 0.0 (0.0 to 0.0)           | 0.0 (0.0 to 0.0)           | 0.0 (0.0 to 0.0)           | 0.0 (0.0 to 0.0)           | 6.3 (5.8 to 6.8)                               | 158.2 (140.0 to 176.0)              |
| Israel                             | 0.0 (0.0 to 0.0)           | 0.0 (0.0 to 0.0)           | 0.0 (0.0 to 0.0)           | 0.0 (0.0 to 0.0)           | -3.0 (-3.9 to -1.6)                            | -36.1 (-44.1 to -21.0)              |
| Italy                              | 0.1 (0.1 to 0.1)           | 0.1 (0.1 to 0.1)           | 0.1 (0.1 to 0.1)           | 0.1 (0.1 to 0.1)           | 0.5 (0.0 to 0.9)                               | 7.4 (0.7 to 14.3)                   |
| Luxembourg                         | 0.0 (0.0 to 0.0)           | 0.0 (0.0 to 0.0)           | 0.0 (0.0 to 0.0)           | 0.0 (0.0 to 0.0)           | 2.7 (1.1 to 4.5)                               | 51.4 (17.5 to 97.6)                 |
| Malta                              | 0.0 (0.0 to 0.0)           | 0.0 (0.0 to 0.0)           | 0.0 (0.0 to 0.0)           | 0.0 (0.0 to 0.0)           | -5.3 (-4.8 to 3.8)                             | -39.9 (-89.2 to 77.4)               |
| Netherlands                        | 0.0 (0.0 to 0.0)           | 0.0 (0.0 to 0.0)           | 0.0 (0.0 to 0.0)           | 0.0 (0.0 to 0.0)           | 1.1 (0.6 to 1.6)                               | 17.7 (9.4 to 26.4)                  |
| Norway                             | 0.1 (0.1 to 0.1)           | 0.1 (0.1 to 0.1)           | 0.1 (0.1 to 0.1)           | 0.1 (0.1 to 0.1)           | -0.9 (-1.4 to -0.5)                            | -12.6 (-18.5 to -7.0)               |
| Portugal                           | 2.6 (2.1 to 3.0)           | 2.3 (1.9 to 2.8)           | 2.3 (1.9 to 2.8)           | 2.3 (1.9 to 2.8)           | -0.1 (-0.4 to 0.2)                             | -1.5 (-6.4 to 3.7)                  |
| Spain                              | 0.8 (0.7 to 1.0)           | 0.9 (0.7 to 1.0)           | 0.9 (0.7 to 1.0)           | 0.8 (0.7 to 1.0)           | 0.0 (-0.3 to 0.3)                              | 0.4 (-4.1 to 4.7)                   |
| Sweden                             | 0.0 (0.0 to 0.0)           | 0.0 (0.0 to 0.0)           | 0.0 (0.0 to 0.0)           | 0.0 (0.0 to 0.0)           | -0.6 (-1.2 to -0.0)                            | -8.3 (-16.0 to -0.4)                |
| Switzerland                        | 0.0 (0.0 to 0.0)           | 0.0 (0.0 to 0.0)           | 0.0 (0.0 to 0.0)           | 0.0 (0.0 to 0.0)           | 0.8 (0.4 to 1.1)                               | 12.2 (5.9 to 18.8)                  |
| United Kingdom                     | 0.1 (0.1 to 0.1)           | 0.1 (0.1 to 0.1)           | 0.1 (0.1 to 0.1)           | 0.1 (0.0 to 0.1)           | -2.0 (-2.6 to -1.5)                            | -26.2 (-32.6 to -20.6)              |
| <b>Latin America and Caribbean</b> |                            |                            |                            |                            |                                                |                                     |
| <b>Andean Latin America</b>        |                            |                            |                            |                            |                                                |                                     |
| Bolivia                            | 24.1 (21.6 to 27.3)        | 15.6 (13.8 to 17.7)        | 14.7 (12.9 to 16.8)        | 11.1 (9.2 to 13.6)         | -2.3 (-3.0 to -1.5)                            | -29.0 (-35.8 to -19.9)              |
| Ecuador                            | 33.3 (27.8 to 39.1)        | 15.3 (11.6 to 19.5)        | 14.1 (10.5 to 18.3)        | 9.3 (5.9 to 14.2)          | -3.5 (-5.2 to -1.5)                            | -39.8 (-54.1 to -20.3)              |
| Peru                               | 18.6 (14.9 to 22.9)        | 9.7 (8.2 to 11.5)          | 9.2 (7.8 to 11.0)          | 7.6 (5.9 to 10.0)          | -1.6 (-2.7 to -0.5)                            | -21.6 (-33.8 to -6.5)               |
| <b>Caribbean</b>                   |                            |                            |                            |                            |                                                |                                     |
| Antigua and Barbuda                | 6.5 (5.0 to 8.6)           | 5.1 (4.1 to 6.5)           | 5.0 (4.0 to 6.4)           | 4.4 (3.0 to 6.8)           | -1.0 (-2.7 to 1.0)                             | -13.5 (-32.8 to 15.9)               |
| The Bahamas                        | 5.1 (3.7 to 6.8)           | 3.8 (3.0 to 4.9)           | 3.8 (3.0 to 4.8)           | 3.7 (2.4 to 5.6)           | -0.3 (-2.1 to 1.9)                             | -3.2 (-27.0 to 33.8)                |
| Barbados                           | 5.2 (3.9 to 6.6)           | 4.0 (3.2 to 5.1)           | 3.9 (3.1 to 5.0)           | 3.9 (2.6 to 5.7)           | -0.3 (-2.1 to 2.1)                             | -3.4 (-26.8 to 38.0)                |
| Belize                             | 11.8 (9.0 to 15.3)         | 8.0 (6.3 to 10.3)          | 7.8 (5.9 to 10.2)          | 6.0 (3.8 to 9.1)           | -2.0 (-4.0 to -1.0)                            | -25.3 (-45.1 to -1.1)               |
| Bermuda                            | 4.1 (3.1 to 5.4)           | 3.0 (2.3 to 3.8)           | 3.0 (2.2 to 3.8)           | 2.6 (1.6 to 4.1)           | -1.1 (-3.2 to 0.9)                             | -14.4 (-37.7 to 14.2)               |
| Cuba                               | 9.1 (6.7 to 12.2)          | 5.2 (4.0 to 6.5)           | 4.9 (3.7 to 6.3)           | 3.7 (2.3 to 5.6)           | -2.4 (-4.3 to -0.3)                            | -29.2 (-47.5 to -3.7)               |
| Dominica                           | 6.7 (5.0 to 8.8)           | 5.0 (3.9 to 6.4)           | 4.8 (3.7 to 6.3)           | 4.2 (2.6 to 6.4)           | -1.2 (-3.2 to 1.0)                             | -15.9 (-38.3 to 15.4)               |
| Dominican Republic                 | 18.7 (14.6 to 23.6)        | 9.7 (7.5 to 13.2)          | 9.4 (7.2 to 12.5)          | 6.2 (4.0 to 9.3)           | -3.3 (-5.1 to -1.2)                            | -37.9 (-53.4 to -15.9)              |
| Grenada                            | 8.4 (6.5 to 10.8)          | 6.2 (4.7 to 7.8)           | 5.9 (4.4 to 7.7)           | 4.6 (2.8 to 7.1)           | -2.1 (-4.2 to -0.1)                            | -26.1 (-47.0 to -0.9)               |
| Guyana                             | 32.1 (28.1 to 36.7)        | 19.6 (16.6 to 23.1)        | 18.2 (15.3 to 21.9)        | 12.4 (9.0 to 17.6)         | -3.1 (-4.5 to -1.3)                            | -37.0 (-48.8 to -17.4)              |
| Haiti                              | 52.3 (45.4 to 60.0)        | 33.4 (28.6 to 39.3)        | 28.6 (23.6 to 34.5)        | 20.4 (13.9 to 29.1)        | -3.4 (-5.1 to -1.7)                            | -39.2 (-53.5 to -22.4)              |
| Jamaica                            | 8.0 (6.1 to 10.5)          | 5.0 (4.0 to 6.4)           | 4.9 (3.9 to 6.3)           | 4.4 (2.9 to 7.0)           | -1.0 (-2.8 to 0.8)                             | -13.4 (-34.0 to 12.8)               |
| Puerto Rico                        | 0.5 (0.3 to 0.6)           | 0.5 (0.4 to 0.7)           | 0.5 (0.4 to 0.7)           | 0.7 (0.5 to 1.6)           | 1.9 (0.6 to 7.5)                               | 38.4 (9.5 to 205.8)                 |
| Saint Lucia                        | 7.9 (6.0 to 10.0)          | 6.5 (5.1 to 8.3)           | 6.2 (4.8 to 8.1)           | 5.1 (3.2 to 7.9)           | -1.7 (-3.7 to 0.4)                             | -21.6 (-42.6 to 5.5)                |
| Saint Vincent and the Grenadines   | 8.8 (6.9 to 11.4)          | 6.7 (5.2 to 8.7)           | 6.5 (4.9 to 8.5)           | 4.9 (3.2 to 7.7)           | -2.2 (-4.1 to -0.1)                            | -27.2 (-45.7 to -1.9)               |
| Suriname                           | 10.6 (8.2 to 13.5)         | 7.0 (5.4 to 8.8)           | 6.7 (5.1 to 8.5)           | 5.0 (3.2 to 7.8)           | -2.3 (-4.1 to -0.3)                            | -28.6 (-45.7 to -4.5)               |
| Trinidad and Tobago                | 6.4 (5.0 to 8.2)           | 4.9 (3.8 to 6.4)           | 4.9 (3.7 to 6.4)           | 4.7 (3.0 to 7.3)           | -0.5 (-2.5 to 1.8)                             | -5.4 (-30.8 to 30.4)                |
| Virgin Islands, U.S.               | 0.1 (0.0 to 0.1)           | 0.1 (0.1 to 0.2)           | 0.1 (0.1 to 0.2)           | 0.1 (0.1 to 0.9)           | 3.9 (1.6 to 12.5)                              | 99.7 (27.6 to 549.3)                |
| <b>Central Latin America</b>       |                            |                            |                            |                            |                                                |                                     |
| Colombia                           | 39.3 (30.5 to 47.7)        | 17.1 (12.7 to 22.4)        | 15.5 (11.2 to 20.6)        | 8.8 (5.0 to 14.9)          | -4.6 (-7.0 to -2.2)                            | -49.3 (-64.8 to -27.9)              |
| Costa Rica                         | 34.3 (26.9 to 42.9)        | 14.4 (10.6 to 18.9)        | 13.4 (9.6 to 17.8)         | 8.4 (4.9 to 14.2)          | -3.8 (-6.0 to -1.4)                            | -42.1 (-59.3 to -18.9)              |
| El Salvador                        | 31.7 (24.9 to 39.6)        | 11.7 (9.3 to 14.6)         | 11.1 (8.7 to 13.9)         | 7.5 (5.3 to 10.8)          | -3.0 (-4.6 to -1.1)                            | -35.9 (-49.9 to -15.7)              |
| Guatemala                          | 48.2 (39.9 to 57.8)        | 19.0 (15.0 to 24.1)        | 17.9 (13.8 to 22.9)        | 10.6 (6.7 to 16.2)         | -4.0 (-5.9 to -1.9)                            | -44.6 (-58.8 to -24.7)              |
| Honduras                           | 47.5 (38.9 to 56.5)        | 25.9 (20.7 to 32.1)        | 24.7 (19.0 to 31.0)        | 17.8 (10.6 to 26.8)        | -2.7 (-4.8 to -0.4)                            | -32.2 (-51.4 to -6.2)               |
| Mexico                             | 30.9 (24.2 to 39.1)        | 17.0 (12.9 to 22.3)        | 16.3 (12.2 to 21.5)        | 13.1 (7.6 to 21.6)         | -1.9 (-4.4 to 0.5)                             | -23.8 (-48.3 to 7.5)                |
| Nicaragua                          | 32.6 (25.6 to 40.0)        | 14.9 (11.8 to 18.6)        | 14.2 (11.1 to 18.1)        | 11.3 (7.0 to 18.1)         | -2.0 (-4.2 to 0.4)                             | -24.7 (-46.6 to 6.9)                |
| Panama                             | 22.6 (17.8 to 28.4)        | 10.1 (7.9 to 13.0)         | 9.6 (7.3 to 12.7)          | 7.4 (4.4 to 12.6)          | -2.3 (-4.6 to 0.5)                             | -27.3 (-49.6 to 7.8)                |



|                                               | Estimate in 2000 (95% UIs) | Estimate in 2015 (95% UIs) | Estimate in 2017 (95% UIs) | Estimate in 2020 (95% UIs) | Annualised rate of change, 2015-2020 (95% UIs) | Percent change, 2015-2020 (95% UIs) |
|-----------------------------------------------|----------------------------|----------------------------|----------------------------|----------------------------|------------------------------------------------|-------------------------------------|
| Venezuela                                     | 54.0 (45.8 to 62.8)        | 40.6 (32.9 to 49.3)        | 39.4 (31.3 to 48.7)        | 31.1 (20.6 to 43.3)        | -1.9 (-3.6 to -0.4)                            | -23.9 (-41.6 to -5.9)               |
| <b>Tropical Latin America</b>                 |                            |                            |                            |                            |                                                |                                     |
| Brazil                                        | 13.9 (11.8 to 16.2)        | 10.4 (9.1 to 12.0)         | 10.1 (8.7 to 11.7)         | 8.5 (7.0 to 11.0)          | -1.3 (-2.2 to -0.2)                            | -18.0 (-27.8 to -3.6)               |
| Paraguay                                      | 13.4 (10.6 to 17.3)        | 8.7 (6.8 to 11.1)          | 8.2 (6.3 to 10.7)          | 5.7 (3.7 to 8.7)           | -2.9 (-4.8 to -0.9)                            | -34.3 (-51.1 to -13.1)              |
| <b>North Africa and Middle East</b>           |                            |                            |                            |                            |                                                |                                     |
| <b>North Africa and Middle East</b>           |                            |                            |                            |                            |                                                |                                     |
| Afghanistan                                   | 52.0 (44.4 to 61.2)        | 36.0 (28.9 to 43.6)        | 33.9 (26.7 to 41.5)        | 25.2 (18.1 to 34.9)        | -2.4 (-3.6 to -1.1)                            | -30.2 (-42.0 to -15.7)              |
| Algeria                                       | 6.0 (4.4 to 8.3)           | 3.7 (2.8 to 4.7)           | 3.5 (2.6 to 4.5)           | 2.7 (1.7 to 4.5)           | -2.1 (-4.2 to 0.2)                             | -25.8 (-46.4 to 3.6)                |
| Bahrain                                       | 3.7 (2.7 to 4.9)           | 2.9 (2.2 to 3.9)           | 2.9 (2.1 to 3.9)           | 2.8 (1.7 to 4.4)           | -0.5 (-2.6 to 1.7)                             | -6.2 (-32.3 to 29.2)                |
| Egypt                                         | 46.5 (42.6 to 51.1)        | 10.3 (8.6 to 12.7)         | 8.7 (7.2 to 10.8)          | 5.8 (4.2 to 8.4)           | -3.9 (-5.4 to -2.2)                            | -43.9 (-55.5 to -28.0)              |
| Iran                                          | 6.1 (4.5 to 8.3)           | 3.5 (2.6 to 4.5)           | 3.4 (2.6 to 4.5)           | 2.8 (1.8 to 4.3)           | -1.5 (-3.4 to 0.4)                             | -19.2 (-40.3 to 5.6)                |
| Iraq                                          | 10.6 (8.4 to 13.7)         | 8.2 (6.7 to 9.9)           | 8.0 (6.5 to 9.7)           | 7.0 (5.3 to 9.5)           | -1.0 (-2.1 to 0.3)                             | -13.9 (-27.5 to 4.0)                |
| Jordan                                        | 6.6 (4.7 to 9.2)           | 3.6 (2.7 to 4.8)           | 3.4 (2.5 to 4.5)           | 2.6 (1.6 to 4.0)           | -2.3 (-4.3 to -0.1)                            | -28.7 (-47.5 to -2.1)               |
| Kuwait                                        | 0.0 (0.0 to 0.0)           | 0.0 (0.0 to 0.0)           | 0.0 (0.0 to 0.0)           | 0.0 (0.0 to 0.0)           | 0.3 (-0.1 to 0.9)                              | 4.6 (-2.1 to 13.9)                  |
| Lebanon                                       | 7.1 (4.9 to 9.8)           | 3.2 (2.4 to 4.2)           | 3.0 (2.2 to 4.0)           | 2.2 (1.3 to 3.5)           | -2.8 (-4.9 to -0.3)                            | -33.2 (-52.3 to -5.0)               |
| Libya                                         | 24.5 (22.0 to 27.4)        | 21.2 (19.0 to 23.8)        | 21.3 (18.9 to 23.9)        | 19.9 (17.2 to 22.6)        | -0.4 (-0.8 to 0.0)                             | -6.3 (-11.2 to -0.6)                |
| Morocco                                       | 12.7 (9.3 to 16.7)         | 7.6 (5.6 to 10.0)          | 7.1 (5.3 to 9.4)           | 5.2 (3.3 to 7.7)           | -2.6 (-4.6 to -0.8)                            | -32.1 (-49.5 to -11.1)              |
| Palestine                                     | 16.5 (11.4 to 22.5)        | 10.2 (7.3 to 13.6)         | 9.4 (6.7 to 12.7)          | 6.5 (4.0 to 10.0)          | -3.1 (-5.1 to -1.2)                            | -36.6 (-53.2 to -16.0)              |
| Oman                                          | 15.1 (10.8 to 20.7)        | 3.8 (3.0 to 4.7)           | 3.6 (2.8 to 4.5)           | 2.2 (1.6 to 3.5)           | -3.5 (-5.3 to -1.3)                            | -40.0 (-54.8 to -17.4)              |
| Qatar                                         | 3.0 (2.1 to 4.1)           | 2.3 (1.7 to 2.9)           | 2.2 (1.6 to 2.9)           | 2.1 (1.3 to 3.3)           | -0.8 (-2.9 to 1.4)                             | -9.5 (-34.8 to 22.9)                |
| Saudi Arabia                                  | 5.1 (3.9 to 6.6)           | 2.9 (2.4 to 3.7)           | 2.7 (2.1 to 3.4)           | 1.9 (1.3 to 2.9)           | -2.9 (-4.6 to -1.0)                            | -34.4 (-49.6 to -14.2)              |
| Sudan                                         | 17.3 (14.2 to 21.1)        | 11.6 (9.7 to 13.7)         | 10.4 (8.7 to 12.6)         | 8.2 (5.8 to 11.2)          | -2.4 (-3.9 to -0.8)                            | -29.4 (-43.9 to -11.8)              |
| Syria                                         | 11.3 (8.1 to 15.0)         | 7.7 (5.9 to 9.7)           | 7.4 (5.7 to 9.4)           | 11.3 (7.6 to 16.0)         | 2.5 (0.4 to 5.0)                               | 48.6 (6.4 to 110.2)                 |
| Tunisia                                       | 8.1 (5.8 to 11.1)          | 4.3 (3.3 to 5.6)           | 4.1 (3.0 to 5.3)           | 3.1 (2.0 to 4.5)           | -2.4 (-4.1 to -0.4)                            | -29.0 (-46.1 to -5.7)               |
| Turkey                                        | 7.0 (4.9 to 9.7)           | 3.2 (2.4 to 4.2)           | 2.9 (2.1 to 3.8)           | 1.9 (1.1 to 3.0)           | -3.6 (-6.0 to -1.1)                            | -40.8 (-59.3 to -15.7)              |
| United Arab Emirates                          | 2.6 (1.9 to 3.5)           | 1.9 (1.5 to 2.5)           | 2.0 (1.5 to 2.6)           | 1.9 (1.2 to 3.1)           | -0.4 (-2.5 to 1.8)                             | -4.1 (-30.9 to 31.8)                |
| Yemen                                         | 42.0 (36.5 to 47.8)        | 23.4 (20.2 to 27.1)        | 19.3 (16.1 to 22.9)        | 14.6 (10.2 to 20.6)        | -3.3 (-4.9 to -1.4)                            | -38.1 (-52.0 to -19.1)              |
| <b>South Asia</b>                             |                            |                            |                            |                            |                                                |                                     |
| <b>South Asia</b>                             |                            |                            |                            |                            |                                                |                                     |
| Bangladesh                                    | 56.5 (51.7 to 61.7)        | 48.7 (40.8 to 56.7)        | 47.7 (39.1 to 55.8)        | 44.9 (31.5 to 58.9)        | -0.6 (-2.0 to 0.5)                             | -8.2 (-26.0 to 8.0)                 |
| Bhutan                                        | 36.5 (29.0 to 45.4)        | 15.2 (11.7 to 19.4)        | 13.9 (10.6 to 18.6)        | 7.1 (4.2 to 11.8)          | -5.2 (-7.4 to -2.9)                            | -53.6 (-68.8 to -35.2)              |
| India                                         | 39.7 (32.7 to 48.1)        | 18.1 (14.2 to 23.0)        | 15.4 (11.9 to 19.7)        | 7.5 (5.0 to 11.2)          | -6.0 (-7.8 to -4.1)                            | -58.9 (-68.8 to -45.7)              |
| Nepal                                         | 90.7 (82.7 to 98.2)        | 49.0 (40.4 to 57.8)        | 44.4 (35.9 to 53.1)        | 27.4 (17.8 to 38.4)        | -4.0 (-5.7 to -2.3)                            | -44.4 (-57.6 to -29.7)              |
| Pakistan                                      | 52.4 (43.3 to 61.9)        | 22.7 (17.6 to 28.9)        | 21.0 (15.8 to 27.5)        | 10.8 (6.6 to 17.1)         | -5.1 (-7.1 to -3.0)                            | -53.0 (-65.3 to -36.4)              |
| <b>Southeast Asia, East Asia, and Oceania</b> |                            |                            |                            |                            |                                                |                                     |
| <b>East Asia</b>                              |                            |                            |                            |                            |                                                |                                     |
| China                                         | 16.4 (13.8 to 20.0)        | 11.6 (9.7 to 13.9)         | 11.6 (9.6 to 14.1)         | 11.0 (8.3 to 14.7)         | -0.4 (-1.6 to 0.9)                             | -5.6 (-21.1 to 14.0)                |
| North Korea                                   | 16.1 (12.3 to 20.4)        | 13.5 (10.4 to 17.1)        | 13.4 (10.1 to 17.4)        | 13.8 (9.1 to 20.1)         | 0.1 (-1.6 to 1.7)                              | 2.1 (-21.5 to 28.2)                 |
| Taiwan (Province of China)                    | 6.5 (4.9 to 8.9)           | 4.9 (3.7 to 6.5)           | 4.9 (3.7 to 6.5)           | 5.3 (3.4 to 8.5)           | 0.5 (-1.4 to 2.4)                              | 8.6 (-18.6 to 43.0)                 |
| <b>Oceania</b>                                |                            |                            |                            |                            |                                                |                                     |
| American Samoa                                | 8.9 (7.9 to 10.2)          | 2.3 (2.1 to 2.5)           | 2.3 (2.1 to 2.5)           | 1.5 (1.2 to 2.6)           | -3.0 (-4.1 to 0.8)                             | -34.9 (-45.8 to 12.6)               |
| Federated States of Micronesia                | 33.1 (28.3 to 38.9)        | 18.5 (14.9 to 22.7)        | 19.1 (15.4 to 23.5)        | 10.0 (8.8 to 19.0)         | -2.5 (-3.9 to -0.8)                            | -34.4 (-44.2 to -11.0)              |
| Fiji                                          | 40.1 (35.8 to 45.7)        | 13.3 (10.9 to 16.1)        | 10.4 (7.9 to 13.4)         | 10.0 (6.0 to 15.8)         | -2.0 (-4.2 to 0.2)                             | -25.4 (-46.9 to 2.8)                |
| Guam                                          | 5.6 (4.2 to 7.3)           | 5.2 (4.1 to 6.7)           | 5.3 (4.0 to 6.9)           | 5.3 (4.3 to 6.9)           | 0.2 (-2.0 to 2.3)                              | -4.2 (-26.0 to 41.1)                |
| Kiribati                                      | 25.7 (21.0 to 31.1)        | 25.4 (20.0 to 31.7)        | 25.4 (19.7 to 32.3)        | 28.4 (18.1 to 42.9)        | 0.6 (-1.3 to 2.3)                              | 10.9 (-17.8 to 41.5)                |
| Marshall Islands                              | 21.1 (17.3 to 25.7)        | 14.6 (11.8 to 18.7)        | 15.1 (12.1 to 18.7)        | 12.8 (8.2 to 19.3)         | -1.0 (-3.0 to 1.0)                             | -13.2 (-36.3 to 15.3)               |
| Northern Mariana Islands                      | 5.4 (4.2 to 6.9)           | 5.9 (4.6 to 7.6)           | 6.1 (4.6 to 8.0)           | 7.5 (4.5 to 11.5)          | 1.4 (-0.7 to 3.3)                              | 24.9 (-10.2 to 65.1)                |
| Papua New Guinea                              | 61.6 (53.2 to 70.2)        | 45.8 (39.4 to 52.9)        | 44.5 (37.9 to 52.0)        | 36.7 (27.0 to 48.9)        | -1.5 (-2.8 to -0.2)                            | -20.1 (-33.9 to -3.3)               |
| Samoa                                         | 21.6 (17.5 to 26.4)        | 15.5 (12.1 to 19.5)        | 15.0 (11.2 to 19.4)        | 14.6 (8.7 to 23.1)         | -0.5 (-2.7 to 1.7)                             | -6.4 (-32.8 to 28.3)                |
| Solomon Islands                               | 38.4 (32.5 to 44.5)        | 28.5 (23.5 to 34.0)        | 26.9 (21.7 to 32.5)        | 20.6 (13.3 to 29.6)        | -2.3 (-4.2 to -0.5)                            | -28.1 (-46.7 to -7.2)               |
| Tonga                                         | 16.0 (13.1 to 19.5)        | 8.7 (7.0 to 10.6)          | 8.3 (6.6 to 10.3)          | 6.8 (4.2 to 10.1)          | -1.8 (-3.8 to 0.1)                             | -22.5 (-43.3 to 1.7)                |
| Vanuatu                                       | 56.6 (49.5 to 64.1)        | 37.1 (30.4 to 44.8)        | 35.1 (27.7 to 43.2)        | 27.9 (17.8 to 40.9)        | -2.0 (-3.7 to -0.3)                            | -25.3 (-43.0 to -4.3)               |
| <b>Southeast Asia</b>                         |                            |                            |                            |                            |                                                |                                     |
| Cambodia                                      | 43.1 (38.0 to 48.5)        | 21.1 (16.1 to 26.4)        | 19.6 (14.3 to 25.6)        | 14.8 (8.2 to 24.1)         | -2.6 (-5.1 to -0.2)                            | -30.7 (-53.4 to -3.1)               |
| Indonesia                                     | 37.5 (31.4 to 43.8)        | 25.5 (21.0 to 30.6)        | 24.1 (19.2 to 29.7)        | 21.7 (14.8 to 31.0)        | -1.2 (-2.8 to 0.5)                             | -15.4 (-34.3 to 7.8)                |
| Laos                                          | 33.3 (29.4 to 37.4)        | 21.0 (17.4 to 25.1)        | 20.3 (16.5 to 24.4)        | 16.4 (11.2 to 22.8)        | -1.7 (-3.2 to -0.3)                            | -22.5 (-37.9 to -3.8)               |
| Malaysia                                      | 20.7 (15.3 to 26.4)        | 9.5 (7.1 to 12.5)          | 9.4 (6.9 to 12.3)          | 8.3 (5.9 to 12.3)          | -1.0 (-2.9 to 0.9)                             | -12.7 (-34.9 to 15.1)               |
| Maldives                                      | 16.9 (12.9 to 21.6)        | 12.2 (9.4 to 15.8)         | 12.2 (9.1 to 15.8)         | 12.0 (7.8 to 17.6)         | -0.2 (-2.1 to 1.5)                             | -2.1 (-27.0 to 25.4)                |
| Mauritius                                     | 41.3 (34.1 to 49.4)        | 34.5 (28.5 to 41.0)        | 34.5 (28.5 to 41.1)        | 34.3 (27.6 to 41.8)        | -0.1 (-0.6 to 0.6)                             | -0.9 (-9.1 to 9.6)                  |
| Myanmar                                       | 77.5 (70.2 to 84.7)        | 35.1 (28.5 to 42.2)        | 33.7 (26.7 to 41.4)        | 20.5 (13.0 to 31.3)        | -3.7 (-5.6 to -1.9)                            | -42.2 (-56.8 to -24.7)              |
| Philippines                                   | 70.3 (66.8 to 73.8)        | 36.8 (34.2 to 39.7)        | 36.8 (34.2 to 39.7)        | 17.2 (13.3 to 22.6)        | -5.1 (-6.4 to -3.7)                            | -53.4 (-61.8 to -42.4)              |
| Sri Lanka                                     | 22.8 (18.8 to 27.7)        | 11.2 (8.7 to 14.3)         | 10.7 (8.1 to 13.9)         | 8.6 (5.4 to 13.1)          | -1.9 (-3.9 to 0.0)                             | -24.1 (-44.1 to -0.7)               |
| Seychelles                                    | 14.5 (10.7 to 19.5)        | 11.2 (8.5 to 14.6)         | 11.3 (8.4 to 14.9)         | 12.1 (7.7 to 18.1)         | 0.4 (-1.3 to 2.1)                              | 7.4 (-17.9 to 37.5)                 |
| Thailand                                      | 27.6 (21.2 to 34.9)        | 18.0 (14.8 to 22.4)        | 17.6 (14.4 to 22.0)        | 16.2 (11.8 to 21.9)        | -0.8 (-2.1 to 0.6)                             | -10.2 (-27.5 to 9.6)                |
| Timor-Leste                                   | 56.4 (49.0 to 65.2)        | 34.6 (29.8 to 40.2)        | 34.4 (29.4 to 40.2)        | 29.1 (21.7 to 38.5)        | -1.2 (-2.5 to 0.1)                             | -16.2 (-31.0 to 1.4)                |
| Vietnam                                       | 62.1 (55.6 to 68.5)        | 35.8 (29.6 to 43.2)        | 33.1 (27.3 to 40.3)        | 22.0 (16.6 to 28.9)        | -3.3 (-4.4 to -2.2)                            | -38.7 (-48.3 to -27.9)              |
| <b>Sub-Saharan Africa</b>                     |                            |                            |                            |                            |                                                |                                     |
| <b>Central Sub-Saharan Africa</b>             |                            |                            |                            |                            |                                                |                                     |
| Angola                                        | 69.3 (60.5 to 78.2)        | 32.8 (28.5 to 37.4)        | 29.9 (25.9 to 34.4)        | 19.2 (15.4 to 24.0)        | -3.6 (-4.6 to -2.5)                            | -41.5 (-49.7 to -31.5)              |
| Central African Republic                      | 69.7 (60.9 to 79.1)        | 47.4 (41.9 to 53.8)        | 46.2 (40.7 to 52.8)        | 34.9 (28.7 to 43.2)        | -2.1 (-2.9 to -1.1)                            | -26.5 (-35.7 to -15.1)              |
| Congo                                         | 61.0 (56.6 to 66.0)        | 38.3 (35.6 to 41.4)        | 30.9 (28.3 to 33.7)        | 18.5 (16.3 to 21.2)        | -4.9 (-5.4 to -4.3)                            | -51.8 (-55.4 to -47.3)              |
| Democratic Republic of the Congo              | 113.9 (102.3 to 126.2)     | 97.5 (88.5 to 109.7)       | 87.4 (77.5 to 101.4)       | 66.7 (56.1 to 82.0)        | -2.5 (-3.2 to -1.8)                            | -31.7 (-38.2 to -23.8)              |
| Equatorial Guinea                             | 41.9 (36.2 to 48.7)        | 19.4 (16.5 to 23.5)        | 18.6 (15.5 to 22.9)        | 11.7 (9.3 to 15.6)         | -3.4 (-4.1 to -2.6)                            | -39.8 (-45.7 to -32.0)              |
| Gabon                                         | 29.5 (25.4 to 33.9)        | 22.2 (19.1 to 25.7)        | 21.5 (18.3 to 24.9)        | 18.4 (15.3 to 21.7)        | -1.3 (-1.7 to -0.8)                            | -17.4 (-22.8 to -11.0)              |
| <b>Eastern Sub-Saharan Africa</b>             |                            |                            |                            |                            |                                                |                                     |
| Burundi                                       | 60.9 (54.4 to 67.7)        | 47.1 (41.7 to 52.7)        | 40.1 (34.4 to 46.5)        | 27.0 (20.2 to 36.3)        | -3.8 (-5.0 to -2.4)                            | -43.0 (-53.1 to -30.3)              |
| Comoros                                       | 32.1 (28.3 to 36.5)        | 16.6 (14.3 to 19.2)        | 15.6 (13.3 to 18.1)        | 9.7 (7.3 to 12.8)          | -3.6 (-4.8 to -2.3)                            | -41.7 (-51.3 to -29.0)              |
| Djibouti                                      | 15.5 (12.0 to 19.8)        | 8.6 (6.5 to 10.9)          | 8.0 (6.0 to 10.3)          | 5.5 (3.4 to 8.7)           | -3.1 (-5.0 to -1.0)                            | -36.6 (-52.5 to -14.2)              |
| Eritrea                                       | 23.6 (20.4 to 27.3)        | 29.1 (24.8 to 34.0)        | 26.5 (22.2 to 31.2)        | 24.7 (18.6 to 31.7)        | -1.1 (-2.3 to 0.0)                             | -15.1 (-28.8 to -0.5)               |
| Ethiopia                                      | 77.7 (69.3 to 86.8)        | 58.5 (52.5 to 64.5)        | 58.0 (51.6 to 64.4)        | 52.5 (45.4 to 62.6)        | -0.7 (-1.5 to 0.1)                             | -10.4 (-20.6 to 0.8)                |

|                                                                                                                                                                                         | Estimate in 2000 (95% UIs) | Estimate in 2015 (95% UIs) | Estimate in 2017 (95% UIs) | Estimate in 2030 (95% UIs) | Annualised rate of change, 2015-2030 (95% UIs) | Percent change, 2015-2030 (95% UIs) |
|-----------------------------------------------------------------------------------------------------------------------------------------------------------------------------------------|----------------------------|----------------------------|----------------------------|----------------------------|------------------------------------------------|-------------------------------------|
| Kenya                                                                                                                                                                                   | 40.5 (35.6 to 45.8)        | 28.4 (26.0 to 31.1)        | 27.9 (25.6 to 30.5)        | 24.3 (21.9 to 27.3)        | -1.1 (-1.5 to -0.5)                            | -14.7 (-20.2 to -7.4)               |
| Madagascar                                                                                                                                                                              | 62.4 (55.6 to 69.4)        | 52.7 (46.2 to 60.1)        | 49.3 (42.7 to 56.8)        | 42.0 (31.7 to 55.0)        | -1.6 (-2.9 to -0.3)                            | -20.6 (-25.5 to -4.1)               |
| Malawi                                                                                                                                                                                  | 52.1 (48.5 to 56.3)        | 24.8 (22.2 to 27.9)        | 18.1 (15.8 to 21.0)        | 10.4 (7.5 to 14.4)         | -5.9 (-7.4 to -4.1)                            | -58.2 (-67.0 to -45.9)              |
| Mozambique                                                                                                                                                                              | 71.0 (61.8 to 80.9)        | 38.9 (33.2 to 45.3)        | 34.8 (29.2 to 41.1)        | 19.3 (14.1 to 26.0)        | -4.7 (-6.0 to -3.4)                            | -50.5 (-59.6 to -40.1)              |
| Rwanda                                                                                                                                                                                  | 81.4 (74.2 to 88.8)        | 46.4 (41.0 to 52.5)        | 40.3 (34.5 to 46.9)        | 23.7 (17.3 to 32.5)        | -4.5 (-5.9 to -2.9)                            | -49.0 (-59.0 to -35.6)              |
| Somalia                                                                                                                                                                                 | 65.4 (56.6 to 74.6)        | 40.8 (35.0 to 47.6)        | 39.6 (33.6 to 46.7)        | 25.9 (19.3 to 35.1)        | -2.2 (-3.3 to -0.9)                            | -27.9 (-38.7 to -13.1)              |
| South Sudan                                                                                                                                                                             | 68.0 (58.4 to 79.0)        | 61.6 (54.0 to 71.9)        | 59.4 (50.5 to 71.8)        | 53.3 (42.4 to 68.1)        | -1.0 (-1.8 to -0.2)                            | -13.6 (-23.3 to -2.8)               |
| Tanzania                                                                                                                                                                                | 120.4 (114.8 to 126.5)     | 62.5 (57.5 to 68.0)        | 52.1 (46.6 to 58.6)        | 28.5 (21.0 to 38.1)        | -5.3 (-6.9 to -3.8)                            | -54.5 (-64.3 to -43.1)              |
| Uganda                                                                                                                                                                                  | 133.6 (129.7 to 137.5)     | 61.4 (58.3 to 64.7)        | 51.0 (47.3 to 54.8)        | 18.7 (15.3 to 22.4)        | -8.0 (-9.0 to -7.0)                            | -49.7 (-73.9 to -64.8)              |
| Zambia                                                                                                                                                                                  | 63.9 (59.1 to 68.9)        | 37.8 (34.0 to 42.0)        | 33.9 (30.1 to 38.2)        | 22.1 (18.5 to 26.9)        | -3.6 (-4.3 to -2.8)                            | -41.7 (-47.2 to -34.4)              |
| <b>Southern Sub-Saharan Africa</b>                                                                                                                                                      |                            |                            |                            |                            |                                                |                                     |
| Botswana                                                                                                                                                                                | 20.2 (16.7 to 24.6)        | 10.9 (9.4 to 12.6)         | 10.6 (9.1 to 12.5)         | 8.2 (6.6 to 10.3)          | -1.9 (-2.8 to -0.9)                            | -25.0 (-34.6 to -12.2)              |
| Lesotho                                                                                                                                                                                 | 27.1 (22.0 to 33.2)        | 13.8 (11.1 to 17.1)        | 13.3 (10.4 to 16.5)        | 8.8 (5.8 to 12.7)          | -3.1 (-4.8 to -1.4)                            | -36.2 (-51.4 to -19.5)              |
| Namibia                                                                                                                                                                                 | 26.8 (22.8 to 31.6)        | 25.1 (22.3 to 28.1)        | 23.2 (20.3 to 26.6)        | 19.6 (15.6 to 24.5)        | -1.7 (-2.7 to -0.6)                            | -22.0 (-33.7 to -9.1)               |
| South Africa                                                                                                                                                                            | 42.9 (38.9 to 47.4)        | 16.5 (14.5 to 18.5)        | 16.2 (14.5 to 18.2)        | 12.4 (10.9 to 14.4)        | -1.9 (-2.6 to -1.2)                            | -25.0 (-31.9 to -16.2)              |
| Swaziland                                                                                                                                                                               | 28.9 (23.4 to 35.1)        | 15.9 (12.9 to 19.3)        | 14.6 (11.6 to 18.1)        | 9.1 (6.2 to 12.9)          | -3.8 (-5.4 to -2.2)                            | -42.9 (-55.3 to -28.0)              |
| Zimbabwe                                                                                                                                                                                | 31.7 (28.3 to 35.4)        | 23.9 (21.0 to 27.5)        | 18.1 (15.4 to 21.3)        | 12.9 (9.2 to 18.4)         | -4.2 (-5.9 to -2.2)                            | -46.4 (-58.6 to -28.1)              |
| <b>Western Sub-Saharan Africa</b>                                                                                                                                                       |                            |                            |                            |                            |                                                |                                     |
| Benin                                                                                                                                                                                   | 92.9 (85.4 to 101.1)       | 59.5 (54.5 to 64.6)        | 50.3 (45.7 to 55.5)        | 29.2 (23.4 to 36.4)        | -4.8 (-5.9 to -3.6)                            | -51.0 (-58.5 to -41.8)              |
| Burkina Faso                                                                                                                                                                            | 108.7 (101.5 to 117.5)     | 34.2 (29.2 to 39.9)        | 28.9 (23.7 to 35.1)        | 24.3 (16.0 to 35.9)        | -2.4 (-4.4 to -0.3)                            | -29.5 (-48.4 to -5.0)               |
| Cameroon                                                                                                                                                                                | 118.7 (110.3 to 128.3)     | 44.4 (40.3 to 49.6)        | 37.0 (33.0 to 42.6)        | 15.9 (13.2 to 20.1)        | -6.9 (-7.7 to -5.9)                            | -44.2 (-48.4 to -38.6)              |
| Cape Verde                                                                                                                                                                              | 21.4 (17.2 to 26.1)        | 7.8 (6.2 to 9.6)           | 7.4 (5.8 to 9.3)           | 4.5 (3.0 to 6.9)           | -3.8 (-5.6 to -1.7)                            | -42.4 (-56.6 to -22.3)              |
| Chad                                                                                                                                                                                    | 65.5 (57.3 to 74.4)        | 60.4 (52.9 to 69.4)        | 56.6 (48.8 to 65.5)        | 50.8 (39.3 to 63.9)        | -1.2 (-2.3 to -0.2)                            | -16.0 (-28.8 to -2.8)               |
| Cote d'Ivoire                                                                                                                                                                           | 58.1 (53.4 to 63.4)        | 44.8 (41.0 to 49.0)        | 38.9 (35.3 to 42.6)        | 26.5 (22.8 to 31.0)        | -5.5 (-6.1 to -2.8)                            | -40.9 (-46.2 to -34.8)              |
| The Gambia                                                                                                                                                                              | 66.8 (61.4 to 72.2)        | 52.6 (49.2 to 56.4)        | 48.4 (44.9 to 52.0)        | 43.2 (38.3 to 49.1)        | -1.3 (-1.9 to -0.7)                            | -17.9 (-25.0 to -10.0)              |
| Ghana                                                                                                                                                                                   | 34.8 (30.8 to 38.8)        | 22.0 (19.6 to 24.7)        | 18.4 (15.7 to 21.5)        | 12.3 (8.8 to 17.0)         | -3.9 (-5.5 to -2.3)                            | -44.2 (-56.5 to -28.8)              |
| Guinea                                                                                                                                                                                  | 74.8 (67.1 to 82.9)        | 47.3 (41.6 to 54.2)        | 43.1 (37.5 to 50.1)        | 29.2 (23.4 to 37.6)        | -3.3 (-4.1 to -2.2)                            | -38.5 (-45.7 to -28.4)              |
| Guinea-Bissau                                                                                                                                                                           | 94.8 (84.6 to 105.1)       | 58.9 (52.1 to 66.5)        | 56.2 (49.3 to 63.5)        | 42.7 (33.9 to 53.0)        | -2.2 (-3.2 to -1.2)                            | -27.7 (-38.2 to -16.1)              |
| Liberia                                                                                                                                                                                 | 159.4 (147.7 to 172.8)     | 116.6 (105.5 to 133.6)     | 103.2 (90.9 to 121.8)      | 72.5 (59.5 to 90.2)        | -3.2 (-4.0 to -2.4)                            | -38.0 (-45.0 to -30.2)              |
| Mali                                                                                                                                                                                    | 129.6 (119.5 to 140.9)     | 49.2 (42.9 to 57.4)        | 45.2 (38.4 to 53.2)        | 27.9 (18.4 to 43.2)        | -3.9 (-6.0 to -2.1)                            | -43.6 (-59.4 to -27.0)              |
| Mauritania                                                                                                                                                                              | 28.9 (23.9 to 34.1)        | 24.7 (20.5 to 29.0)        | 22.7 (18.4 to 27.0)        | 17.6 (12.5 to 23.3)        | -3.3 (-3.7 to -1.0)                            | -38.9 (-43.2 to -13.8)              |
| Niger                                                                                                                                                                                   | 43.6 (40.1 to 47.2)        | 38.8 (33.5 to 44.4)        | 30.9 (25.9 to 36.3)        | 23.8 (17.3 to 31.4)        | -3.3 (-4.7 to -1.9)                            | -38.9 (-50.3 to -25.2)              |
| Nigeria                                                                                                                                                                                 | 112.0 (106.7 to 117.5)     | 58.4 (55.1 to 61.7)        | 52.6 (48.1 to 57.2)        | 32.2 (26.8 to 39.1)        | -4.0 (-4.9 to -2.9)                            | -44.9 (-52.0 to -35.1)              |
| Sao Tome and Principe                                                                                                                                                                   | 53.6 (45.1 to 62.8)        | 16.9 (13.3 to 21.6)        | 18.7 (14.3 to 24.6)        | 18.9 (12.5 to 27.9)        | 0.7 (-0.8 to 2.1)                              | 11.0 (-11.1 to 37.2)                |
| Senegal                                                                                                                                                                                 | 78.5 (70.6 to 87.5)        | 60.3 (54.5 to 66.7)        | 50.0 (44.1 to 56.5)        | 40.5 (31.3 to 51.2)        | -2.7 (-4.0 to -1.5)                            | -33.0 (-45.1 to -19.7)              |
| Sierra Leone                                                                                                                                                                            | 78.3 (71.0 to 85.6)        | 41.0 (35.9 to 46.4)        | 37.0 (31.1 to 43.9)        | 21.6 (15.2 to 29.4)        | -4.4 (-5.9 to -2.9)                            | -47.7 (-58.9 to -34.8)              |
| Togo                                                                                                                                                                                    | 105.3 (98.4 to 112.4)      | 62.4 (58.5 to 66.6)        | 39.6 (35.0 to 45.1)        | 26.9 (19.2 to 36.5)        | -5.7 (-7.6 to -3.9)                            | -57.1 (-67.9 to -43.9)              |
| <b>Indicator 3.4.1: Age-standardised death rate due to cardiovascular disease, cancer, diabetes, and chronic respiratory disease in populations aged 30-70 (per 100,000 population)</b> |                            |                            |                            |                            |                                                |                                     |
| Central Europe, Eastern Europe, and Central Asia                                                                                                                                        |                            |                            |                            |                            |                                                |                                     |
| Central Asia                                                                                                                                                                            |                            |                            |                            |                            |                                                |                                     |
| Armenia                                                                                                                                                                                 | 538.1 (532.1 to 543.6)     | 428.8 (419.6 to 429.9)     | 420.3 (406.9 to 433.4)     | 369.8 (318.9 to 414.2)     | -0.9 (-1.9 to -0.2)                            | -12.9 (-25.1 to -2.7)               |
| Azerbaijan                                                                                                                                                                              | 695.4 (670.4 to 720.9)     | 594.1 (568.4 to 620.0)     | 587.5 (550.1 to 631.5)     | 502.1 (415.5 to 584.9)     | -1.1 (-2.5 to -0.2)                            | -15.5 (-31.5 to -3.2)               |
| Georgia                                                                                                                                                                                 | 510.0 (490.9 to 529.3)     | 523.7 (517.5 to 530.3)     | 545.5 (529.8 to 561.7)     | 461.2 (394.8 to 521.6)     | -0.9 (-1.9 to -0.0)                            | -11.9 (-24.4 to -0.4)               |
| Kazakhstan                                                                                                                                                                              | 860.0 (854.3 to 865.4)     | 547.8 (538.5 to 560.6)     | 535.7 (511.8 to 561.6)     | 467.2 (345.9 to 577.0)     | -1.1 (-3.1 to 0.3)                             | -14.7 (-36.8 to 5.4)                |
| Kyrgyzstan                                                                                                                                                                              | 725.0 (695.1 to 758.8)     | 516.9 (510.9 to 523.9)     | 478.4 (464.6 to 493.5)     | 432.2 (309.1 to 557.3)     | -1.3 (-3.5 to 0.5)                             | -16.4 (-40.6 to 7.7)                |
| Mongolia                                                                                                                                                                                | 1031.6 (997.0 to 1064.5)   | 729.3 (684.8 to 771.0)     | 716.3 (660.2 to 774.2)     | 614.4 (474.7 to 760.9)     | -1.2 (-2.8 to 0.2)                             | -15.8 (-34.3 to 3.0)                |
| Tajikistan                                                                                                                                                                              | 540.5 (518.0 to 565.9)     | 535.4 (502.2 to 568.4)     | 539.3 (490.7 to 587.9)     | 455.8 (357.1 to 556.4)     | -1.1 (-2.7 to 0.2)                             | -14.9 (-33.0 to 2.8)                |
| Turkmenistan                                                                                                                                                                            | 748.1 (740.8 to 755.7)     | 659.2 (643.4 to 674.2)     | 653.4 (612.1 to 696.2)     | 518.5 (428.5 to 596.4)     | -1.6 (-2.9 to -0.7)                            | -21.3 (-34.8 to -10.2)              |
| Uzbekistan                                                                                                                                                                              | 706.0 (685.2 to 727.8)     | 659.3 (618.8 to 700.8)     | 636.1 (573.0 to 704.9)     | 505.2 (402.6 to 606.4)     | -1.8 (-3.2 to -0.6)                            | -23.4 (-38.0 to -9.2)               |
| Central Europe                                                                                                                                                                          |                            |                            |                            |                            |                                                |                                     |
| Albania                                                                                                                                                                                 | 326.0 (310.1 to 341.1)     | 287.2 (240.5 to 337.2)     | 283.9 (236.7 to 338.3)     | 242.2 (193.3 to 300.2)     | -1.1 (-2.0 to -0.2)                            | -15.0 (-35.8 to 9.9)                |
| Bosnia and Herzegovina                                                                                                                                                                  | 448.3 (408.6 to 487.1)     | 392.0 (376.5 to 399.7)     | 385.5 (360.1 to 406.9)     | 334.5 (300.2 to 369.8)     | -1.1 (-1.8 to -0.4)                            | -14.7 (-23.3 to -5.7)               |
| Bulgaria                                                                                                                                                                                | 615.8 (610.8 to 620.5)     | 512.8 (507.3 to 518.1)     | 517.4 (489.4 to 544.9)     | 390.4 (334.6 to 460.4)     | -1.8 (-2.9 to -0.7)                            | -23.9 (-35.0 to -10.3)              |
| Croatia                                                                                                                                                                                 | 455.8 (450.4 to 461.5)     | 344.7 (339.8 to 349.5)     | 313.4 (296.4 to 331.4)     | 252.5 (224.2 to 287.6)     | -2.1 (-2.9 to -1.2)                            | -26.7 (-35.1 to -16.6)              |
| Czech Republic                                                                                                                                                                          | 460.3 (456.4 to 463.9)     | 302.5 (298.8 to 306.3)     | 295.5 (278.9 to 312.9)     | 235.1 (210.7 to 261.6)     | -1.7 (-2.4 to -1.0)                            | -22.3 (-30.5 to -13.5)              |
| Hungary                                                                                                                                                                                 | 627.2 (622.4 to 632.7)     | 498.8 (494.2 to 503.8)     | 445.4 (424.8 to 468.5)     | 353.0 (316.4 to 400.2)     | -2.3 (-3.0 to -1.5)                            | -29.2 (-36.6 to -19.7)              |
| Macedonia                                                                                                                                                                               | 515.7 (506.9 to 524.0)     | 419.7 (412.1 to 427.3)     | 417.4 (394.4 to 443.7)     | 351.3 (309.4 to 391.8)     | -1.2 (-2.0 to -0.4)                            | -16.3 (-26.1 to -6.4)               |
| Montenegro                                                                                                                                                                              | 531.0 (518.3 to 544.1)     | 422.4 (401.1 to 446.9)     | 418.0 (385.3 to 454.0)     | 345.0 (293.4 to 396.0)     | -1.4 (-2.4 to -0.5)                            | -18.3 (-30.1 to -7.3)               |
| Poland                                                                                                                                                                                  | 513.8 (510.8 to 516.7)     | 378.2 (375.1 to 381.3)     | 365.4 (347.2 to 384.2)     | 268.7 (245.4 to 296.8)     | -2.3 (-2.9 to -1.6)                            | -29.0 (-35.1 to -21.4)              |
| Romania                                                                                                                                                                                 | 562.2 (558.2 to 566.2)     | 445.0 (440.6 to 449.0)     | 448.0 (426.4 to 469.3)     | 324.9 (281.4 to 384.2)     | -2.1 (-3.1 to -0.9)                            | -27.0 (-36.9 to -13.2)              |
| Serbia                                                                                                                                                                                  | 603.2 (596.2 to 608.3)     | 468.2 (462.6 to 473.4)     | 438.1 (415.6 to 459.7)     | 400.6 (336.9 to 461.8)     | -1.1 (-2.2 to -0.1)                            | -14.4 (-27.9 to -0.9)               |
| Slovakia                                                                                                                                                                                | 526.1 (520.1 to 532.8)     | 380.0 (372.1 to 395.6)     | 385.2 (335.3 to 377.4)     | 276.1 (244.0 to 315.8)     | -2.1 (-3.0 to -1.3)                            | -27.3 (-36.0 to -17.2)              |
| Slovenia                                                                                                                                                                                | 374.7 (368.9 to 381.3)     | 237.1 (232.2 to 242.1)     | 228.2 (213.6 to 244.2)     | 181.7 (162.2 to 200.8)     | -1.8 (-2.5 to -1.1)                            | -23.4 (-31.6 to -14.9)              |
| Eastern Europe                                                                                                                                                                          |                            |                            |                            |                            |                                                |                                     |
| Belarus                                                                                                                                                                                 | 725.9 (718.1 to 731.5)     | 499.5 (491.4 to 506.4)     | 486.4 (462.2 to 512.0)     | 375.4 (296.2 to 467.8)     | -1.9 (-3.5 to -0.5)                            | -24.8 (-40.7 to -6.6)               |
| Estonia                                                                                                                                                                                 | 576.4 (567.3 to 586.8)     | 338.1 (330.3 to 346.5)     | 325.1 (286.1 to 364.9)     | 264.9 (206.4 to 333.1)     | -1.7 (-3.3 to -0.2)                            | -21.7 (-38.7 to -2.3)               |
| Latvia                                                                                                                                                                                  | 604.9 (597.0 to 613.3)     | 465.9 (457.4 to 474.2)     | 459.1 (413.1 to 508.8)     | 352.8 (265.6 to 476.5)     | -1.9 (-3.7 to 0.1)                             | -24.3 (-43.0 to 2.1)                |
| Lithuania                                                                                                                                                                               | 500.9 (494.4 to 506.7)     | 443.8 (437.3 to 450.5)     | 435.8 (410.9 to 461.5)     | 346.5 (267.3 to 465.9)     | -1.7 (-3.4 to 0.3)                             | -21.9 (-40.2 to 4.9)                |
| Moldova                                                                                                                                                                                 | 621.1 (614.5 to 628.0)     | 546.2 (539.8 to 554.2)     | 499.0 (484.7 to 514.3)     | 423.8 (325.1 to 600.3)     | -1.8 (-3.5 to 0.6)                             | -22.4 (-40.6 to 9.7)                |
| Russia                                                                                                                                                                                  | 839.3 (837.6 to 843.9)     | 566.0 (563.6 to 567.9)     | 531.9 (527.0 to 536.5)     | 428.7 (285.9 to 607.4)     | -2.0 (-4.6 to 0.5)                             | -24.3 (-49.7 to 7.3)                |
| Ukraine                                                                                                                                                                                 | 755.4 (749.8 to 760.6)     | 694.8 (687.6 to 702.0)     | 627.5 (596.8 to 658.4)     | 561.9 (432.3 to 721.2)     | -1.5 (-3.2 to 0.2)                             | -19.1 (-37.8 to 3.7)                |
| High-income                                                                                                                                                                             |                            |                            |                            |                            |                                                |                                     |
| Australia                                                                                                                                                                               |                            |                            |                            |                            |                                                |                                     |
| Australia                                                                                                                                                                               | 263.4 (261.2 to 265.4)     | 189.2 (187.3 to 191.5)     | 190.8 (171.9 to 211.4)     | 166.1 (147.2 to 186.9)     | -0.9 (-1.7 to -0.1)                            | -12.2 (-22.0 to -1.3)               |
| New Zealand                                                                                                                                                                             | 321.1 (317.4 to 325.1)     | 217.0 (213.9 to 220.2)     | 221.4 (211.5 to 233.0)     | 183.7 (163.7 to 207.2)     | -1.1 (-1.9 to -0.3)                            | -15.4 (-24.8 to -4.7)               |
| High-income Asia Pacific                                                                                                                                                                |                            |                            |                            |                            |                                                |                                     |
| Bruni                                                                                                                                                                                   | 499.9 (479.8 to 519.1)     | 435.8 (413.0 to 461.1)     | 428.8 (399.6 to 460.2)     | 372.3 (314.1 to 440.4)     | -1.1 (-2.1 to -0.0)                            | -14.6 (-26.8 to -0.7)               |
| Japan                                                                                                                                                                                   | 222.6 (221.9 to 223.3)     | 162.5 (160.7 to 163.6)     | 160.6 (156.6 to 164.9)     | 133.7 (119.3 to 150.3)     | -1.3 (-2.1 to -0.5)                            | -17.7 (-26.8 to -7.7)               |
| South Korea                                                                                                                                                                             | 335.5 (333.4 to 337.8)     | 164.6 (158.6 to 170.5)     | 158.4 (148.0 to 169.1)     | 133.4 (111.3 to 158.0)     | -1.4 (-2.6 to -0.3)                            | -18.9 (-32.3 to -4.1)               |
| Singapore                                                                                                                                                                               | 313.8 (292.4 to 335.8)     | 168.8 (165.9 to 171.6)     | 161.6 (151.8 to 171.6)     | 128.9 (110.1 to 148.2)     | -1.8 (-2.8 to -0.9)                            | -23.6 (-34.7 to -12.1)              |

|                                     | Estimate in 2000 (95% UIs) | Estimate in 2015 (95% UIs) | Estimate in 2017 (95% UIs) | Estimate in 2030 (95% UIs) | Annualised rate of change, 2015-2030 (95% UIs) | Percent change, 2015-2030 (95% UIs) |
|-------------------------------------|----------------------------|----------------------------|----------------------------|----------------------------|------------------------------------------------|-------------------------------------|
| <b>High-income North America</b>    |                            |                            |                            |                            |                                                |                                     |
| Canada                              | 286.4 (284.2 to 288.4)     | 213.5 (211.6 to 215.6)     | 208.0 (197.2 to 219.6)     | 180.6 (167.0 to 194.1)     | -1.1 (-1.6 to -0.6)                            | -15.4 (-21.8 to -8.8)               |
| Greenland                           | 627.5 (610.1 to 646.8)     | 450.2 (436.0 to 465.6)     | 438.3 (417.5 to 456.9)     | 387.1 (306.9 to 494.0)     | -1.1 (-2.6 to 0.6)                             | -14.0 (-31.9 to 9.2)                |
| United States                       | 369.3 (368.2 to 370.5)     | 281.3 (279.9 to 284.2)     | 287.9 (281.4 to 294.4)     | 253.9 (212.2 to 293.5)     | -0.7 (-1.9 to 0.3)                             | -9.7 (-24.5 to 4.5)                 |
| <b>Southern Latin America</b>       |                            |                            |                            |                            |                                                |                                     |
| Argentina                           | 432.7 (429.3 to 435.9)     | 333.1 (329.3 to 336.8)     | 333.4 (301.1 to 371.7)     | 293.8 (262.5 to 329.6)     | -0.8 (-1.6 to -0.1)                            | -11.8 (-21.0 to -0.9)               |
| Chile                               | 288.0 (284.9 to 291.5)     | 235.8 (232.9 to 239.3)     | 235.8 (212.4 to 261.6)     | 201.5 (170.1 to 235.0)     | -1.1 (-2.2 to -0.0)                            | -14.6 (-28.0 to -0.6)               |
| Uruguay                             | 445.4 (439.4 to 450.9)     | 349.9 (343.9 to 355.6)     | 349.4 (314.7 to 386.8)     | 311.5 (275.7 to 347.2)     | -0.8 (-1.6 to -0.1)                            | -11.0 (-20.9 to -1.0)               |
| <b>Western Europe</b>               |                            |                            |                            |                            |                                                |                                     |
| Andorra                             | 241.0 (218.1 to 266.5)     | 203.1 (183.3 to 224.8)     | 200.9 (180.0 to 225.1)     | 179.1 (155.4 to 205.1)     | -0.8 (-1.5 to -0.2)                            | -11.8 (-19.8 to -3.4)               |
| Austria                             | 299.4 (296.2 to 303.1)     | 216.9 (213.3 to 222.2)     | 208.9 (196.8 to 221.3)     | 178.5 (160.6 to 197.1)     | -1.3 (-2.0 to -0.6)                            | -17.7 (-26.0 to -8.9)               |
| Belgium                             | 310.0 (306.9 to 313.0)     | 228.8 (225.5 to 231.8)     | 217.4 (205.5 to 229.8)     | 189.4 (174.6 to 206.9)     | -1.3 (-1.8 to -0.7)                            | -17.1 (-23.8 to -9.5)               |
| Cyprus                              | 325.7 (308.6 to 343.9)     | 222.9 (208.4 to 239.3)     | 216.8 (198.6 to 236.6)     | 175.0 (154.5 to 196.7)     | -1.6 (-2.2 to -1.0)                            | -21.5 (-28.4 to -14.4)              |
| Denmark                             | 364.8 (360.1 to 369.6)     | 227.4 (223.7 to 231.7)     | 231.1 (217.7 to 244.4)     | 189.8 (174.1 to 207.8)     | -1.2 (-1.8 to -0.6)                            | -16.5 (-23.9 to -8.4)               |
| Finland                             | 290.8 (287.2 to 294.8)     | 199.3 (195.4 to 204.0)     | 202.4 (191.1 to 215.4)     | 169.7 (151.3 to 190.0)     | -1.1 (-1.9 to -0.3)                            | -14.8 (-24.4 to -4.8)               |
| France                              | 284.1 (282.2 to 285.9)     | 216.0 (213.7 to 218.3)     | 208.3 (197.3 to 220.0)     | 178.0 (164.4 to 192.8)     | -1.3 (-1.8 to -0.8)                            | -17.6 (-23.7 to -10.8)              |
| Germany                             | 316.4 (314.4 to 318.3)     | 244.8 (242.9 to 247.1)     | 245.9 (221.0 to 271.9)     | 201.6 (178.2 to 227.9)     | -1.3 (-2.1 to -0.5)                            | -17.6 (-26.9 to -6.9)               |
| Greece                              | 283.1 (280.4 to 285.7)     | 260.8 (257.8 to 264.0)     | 260.1 (245.2 to 275.0)     | 212.2 (191.3 to 234.7)     | -1.4 (-2.1 to -0.7)                            | -18.6 (-26.6 to -9.8)               |
| Iceland                             | 246.0 (240.3 to 251.9)     | 181.1 (176.0 to 186.4)     | 181.3 (174.0 to 188.7)     | 154.1 (138.4 to 174.1)     | -1.1 (-1.8 to -0.3)                            | -14.9 (-23.8 to -3.7)               |
| Ireland                             | 352.3 (347.6 to 357.0)     | 205.7 (202.2 to 209.3)     | 199.8 (187.6 to 212.7)     | 164.3 (148.5 to 183.9)     | -1.5 (-2.2 to -0.8)                            | -20.1 (-28.4 to -10.7)              |
| Israel                              | 287.9 (284.3 to 291.6)     | 180.3 (177.2 to 183.7)     | 176.1 (165.9 to 186.7)     | 145.4 (118.6 to 176.7)     | -1.5 (-2.8 to -0.1)                            | -19.1 (-34.4 to -2.2)               |
| Italy                               | 270.0 (268.5 to 271.6)     | 192.5 (190.9 to 194.7)     | 179.9 (169.6 to 190.3)     | 148.4 (136.7 to 159.3)     | -1.7 (-2.3 to -1.3)                            | -22.9 (-29.2 to -17.2)              |
| Luxembourg                          | 314.1 (308.0 to 320.8)     | 210.6 (197.9 to 223.3)     | 206.6 (188.8 to 225.4)     | 171.5 (141.2 to 202.9)     | -1.4 (-2.6 to -0.4)                            | -18.6 (-31.8 to -5.2)               |
| Malta                               | 282.5 (276.1 to 288.7)     | 209.4 (203.0 to 215.7)     | 216.5 (206.4 to 226.8)     | 171.4 (140.1 to 208.5)     | -1.4 (-2.6 to 0.0)                             | -18.1 (-32.2 to 0.3)                |
| Netherlands                         | 328.9 (326.0 to 331.7)     | 219.5 (217.1 to 221.7)     | 218.9 (207.5 to 232.0)     | 184.1 (169.9 to 199.9)     | -1.2 (-1.7 to -0.6)                            | -16.1 (-22.7 to -8.6)               |
| Norway                              | 286.4 (284.3 to 288.5)     | 185.2 (183.1 to 187.9)     | 185.2 (181.3 to 189.2)     | 157.4 (146.2 to 168.2)     | -1.1 (-1.6 to -0.7)                            | -15.1 (-21.1 to -9.5)               |
| Portugal                            | 314.3 (311.0 to 317.3)     | 213.9 (210.7 to 217.3)     | 219.1 (205.8 to 232.1)     | 171.1 (146.6 to 203.3)     | -1.5 (-2.5 to -0.3)                            | -20.0 (-31.8 to -4.9)               |
| Spain                               | 270.2 (268.2 to 272.1)     | 202.9 (201.3 to 204.4)     | 195.2 (184.9 to 204.9)     | 156.4 (140.0 to 174.2)     | -1.7 (-2.5 to -1.0)                            | -22.9 (-31.0 to -14.4)              |
| Sweden                              | 253.2 (250.6 to 256.0)     | 183.5 (181.2 to 185.9)     | 177.5 (168.5 to 186.4)     | 147.7 (135.8 to 160.0)     | -1.5 (-2.0 to -0.9)                            | -19.5 (-26.1 to -12.6)              |
| Switzerland                         | 239.8 (237.0 to 242.5)     | 159.9 (157.4 to 162.6)     | 150.2 (141.5 to 159.2)     | 128.4 (114.6 to 142.8)     | -1.5 (-2.2 to -0.8)                            | -19.7 (-28.6 to -10.7)              |
| United Kingdom                      | 325.8 (324.3 to 327.3)     | 225.1 (224.1 to 227.5)     | 229.3 (226.6 to 232.8)     | 188.2 (176.6 to 205.4)     | -1.2 (-1.8 to -0.6)                            | -16.4 (-24.1 to -8.7)               |
| <b>Latin America and Caribbean</b>  |                            |                            |                            |                            |                                                |                                     |
| <b>Andean Latin America</b>         |                            |                            |                            |                            |                                                |                                     |
| Bolivia                             | 468.6 (424.8 to 518.1)     | 361.6 (298.1 to 427.4)     | 353.3 (286.5 to 420.5)     | 292.5 (231.5 to 355.4)     | -1.4 (-2.1 to -0.7)                            | -19.1 (-27.5 to -10.3)              |
| Ecuador                             | 269.1 (266.0 to 272.4)     | 239.7 (228.7 to 251.0)     | 243.1 (221.8 to 266.1)     | 214.8 (189.7 to 243.3)     | -0.7 (-1.6 to 0.1)                             | -10.3 (-21.2 to 2.2)                |
| Peru                                | 245.3 (228.2 to 261.4)     | 187.8 (171.2 to 203.1)     | 184.7 (158.9 to 211.3)     | 152.6 (116.2 to 190.1)     | -1.4 (-3.1 to 0.0)                             | -18.7 (-37.3 to 0.5)                |
| <b>Caribbean</b>                    |                            |                            |                            |                            |                                                |                                     |
| Antigua and Barbuda                 | 396.8 (381.4 to 412.2)     | 315.7 (301.3 to 330.4)     | 313.9 (295.6 to 332.4)     | 278.1 (230.9 to 326.3)     | -0.9 (-2.0 to 0.2)                             | -11.9 (-26.2 to 3.3)                |
| The Bahamas                         | 477.2 (466.2 to 488.2)     | 435.7 (413.3 to 457.6)     | 432.7 (400.0 to 465.2)     | 393.0 (328.3 to 472.2)     | -0.7 (-1.8 to 0.4)                             | -9.8 (-23.7 to 6.6)                 |
| Barbados                            | 373.1 (363.0 to 384.0)     | 316.7 (298.3 to 333.5)     | 314.3 (289.7 to 338.8)     | 295.1 (258.4 to 329.5)     | -0.5 (-1.3 to 0.2)                             | -8.8 (-17.1 to 2.5)                 |
| Belize                              | 477.2 (466.0 to 488.8)     | 364.0 (355.3 to 373.0)     | 364.9 (352.6 to 378.0)     | 333.9 (272.4 to 399.0)     | -0.6 (-1.7 to 0.6)                             | -8.3 (-23.0 to 10.2)                |
| Bermuda                             | 332.0 (320.5 to 344.3)     | 318.5 (215.3 to 377.6)     | 223.9 (209.5 to 237.9)     | 172.1 (129.3 to 233.5)     | -1.9 (-3.6 to -0.2)                            | -24.0 (-41.8 to -3.1)               |
| Cuba                                | 359.8 (356.7 to 362.9)     | 327.7 (323.9 to 331.4)     | 323.9 (292.5 to 358.4)     | 280.3 (246.7 to 316.3)     | -1.1 (-1.9 to -0.3)                            | -14.5 (-24.5 to -3.9)               |
| Dominica                            | 382.4 (369.4 to 394.8)     | 397.4 (378.0 to 415.5)     | 395.6 (369.9 to 420.6)     | 367.1 (312.6 to 431.5)     | -0.5 (-1.5 to 0.5)                             | -7.7 (-20.7 to 7.4)                 |
| Dominican Republic                  | 327.9 (300.5 to 354.5)     | 404.3 (369.2 to 438.7)     | 402.1 (349.0 to 452.0)     | 338.0 (274.9 to 411.2)     | -1.2 (-2.4 to -0.1)                            | -16.4 (-30.3 to -1.1)               |
| Grenada                             | 441.1 (428.5 to 453.2)     | 462.6 (447.9 to 478.2)     | 462.6 (443.1 to 483.6)     | 422.0 (383.4 to 462.1)     | -0.6 (-1.2 to -0.1)                            | -8.8 (-16.1 to -0.8)                |
| Guyana                              | 716.0 (705.1 to 727.4)     | 614.8 (579.3 to 653.0)     | 593.3 (532.0 to 657.2)     | 520.0 (439.6 to 602.1)     | -1.1 (-2.1 to -0.3)                            | -15.4 (-27.4 to -4.4)               |
| Haiti                               | 811.1 (710.9 to 917.4)     | 688.2 (568.0 to 805.8)     | 676.2 (558.6 to 790.6)     | 592.6 (490.6 to 703.2)     | -1.0 (-1.5 to -0.6)                            | -13.9 (-20.1 to -7.9)               |
| Jamaica                             | 424.7 (419.0 to 430.4)     | 418.4 (377.3 to 463.5)     | 422.7 (369.5 to 479.3)     | 407.1 (342.6 to 487.4)     | -0.2 (-1.0 to 0.8)                             | -2.7 (-14.0 to 12.1)                |
| Puerto Rico                         | 312.4 (307.7 to 317.5)     | 218.5 (214.2 to 223.8)     | 232.5 (219.2 to 246.6)     | 193.7 (171.3 to 216.7)     | -0.8 (-1.6 to -0.0)                            | -11.3 (-21.6 to -0.5)               |
| Saint Lucia                         | 426.2 (416.2 to 436.6)     | 377.3 (361.8 to 392.9)     | 379.6 (358.8 to 402.3)     | 343.2 (296.5 to 391.6)     | -0.6 (-1.5 to 0.2)                             | -9.0 (-20.3 to 2.4)                 |
| Saint Vincent and the Grenadines    | 476.5 (464.2 to 489.5)     | 469.8 (452.4 to 487.3)     | 467.9 (442.9 to 493.9)     | 434.4 (392.6 to 478.6)     | -0.5 (-1.1 to 0.1)                             | -7.5 (-15.6 to 0.9)                 |
| Suriname                            | 510.8 (484.2 to 541.2)     | 435.6 (404.3 to 469.4)     | 433.3 (390.3 to 477.4)     | 402.1 (341.1 to 462.3)     | -0.5 (-1.4 to 0.2)                             | -7.7 (-19.0 to 3.1)                 |
| Trinidad and Tobago                 | 603.4 (593.1 to 612.7)     | 427.0 (364.2 to 500.5)     | 435.4 (361.6 to 520.9)     | 378.2 (301.1 to 461.4)     | -0.8 (-1.9 to 0.3)                             | -11.3 (-25.1 to 5.4)                |
| Virgin Islands, U.S.                | 476.4 (445.3 to 507.2)     | 472.0 (413.5 to 516.4)     | 463.5 (393.8 to 514.6)     | 371.2 (310.3 to 430.5)     | -1.6 (-2.3 to -0.9)                            | -21.2 (-29.6 to -12.4)              |
| <b>Central Latin America</b>        |                            |                            |                            |                            |                                                |                                     |
| Colombia                            | 310.5 (308.1 to 312.8)     | 206.2 (203.2 to 208.6)     | 205.7 (185.8 to 227.9)     | 165.1 (138.5 to 202.9)     | -1.4 (-2.7 to -0.1)                            | -18.5 (-32.9 to -1.7)               |
| Costa Rica                          | 269.3 (265.1 to 273.8)     | 224.1 (219.9 to 228.4)     | 238.2 (224.7 to 252.1)     | 211.6 (186.6 to 235.7)     | -0.4 (-1.2 to 0.3)                             | -5.6 (-17.0 to 5.1)                 |
| El Salvador                         | 296.8 (284.0 to 316.9)     | 292.4 (263.3 to 320.8)     | 288.0 (244.2 to 339.0)     | 249.4 (203.3 to 306.2)     | -1.1 (-2.2 to 0.0)                             | -14.8 (-27.9 to 0.6)                |
| Guatemala                           | 307.7 (303.4 to 311.8)     | 280.3 (276.3 to 284.5)     | 289.3 (261.7 to 320.4)     | 250.3 (216.8 to 284.9)     | -0.8 (-1.7 to 0.1)                             | -10.7 (-22.4 to 1.7)                |
| Honduras                            | 388.9 (323.7 to 456.8)     | 341.1 (286.4 to 409.0)     | 335.9 (280.1 to 397.6)     | 285.2 (233.1 to 339.4)     | -1.3 (-1.9 to -0.7)                            | -17.2 (-24.6 to -10.2)              |
| Mexico                              | 304.7 (303.3 to 306.3)     | 270.2 (268.8 to 272.0)     | 276.9 (272.9 to 281.3)     | 248.9 (221.9 to 277.0)     | -0.6 (-1.3 to 0.1)                             | -8.0 (-18.0 to 1.9)                 |
| Nicaragua                           | 277.9 (260.5 to 295.9)     | 228.3 (221.6 to 243.7)     | 216.3 (193.1 to 244.7)     | 185.8 (151.6 to 222.9)     | -1.4 (-2.7 to -0.2)                            | -18.6 (-33.2 to -2.5)               |
| Panama                              | 237.8 (233.8 to 241.5)     | 224.2 (220.4 to 228.4)     | 215.5 (202.4 to 227.9)     | 184.3 (165.5 to 203.1)     | -1.3 (-2.0 to -0.7)                            | -17.8 (-26.4 to -9.3)               |
| Venezuela                           | 377.0 (374.1 to 379.9)     | 327.1 (310.3 to 342.9)     | 328.5 (286.1 to 378.7)     | 290.4 (238.9 to 345.7)     | -0.8 (-1.9 to 0.2)                             | -11.3 (-24.7 to 3.3)                |
| <b>Tropical Latin America</b>       |                            |                            |                            |                            |                                                |                                     |
| Brazil                              | 444.9 (442.2 to 447.5)     | 323.3 (321.4 to 326.4)     | 329.6 (326.2 to 333.8)     | 282.8 (261.1 to 306.4)     | -0.9 (-1.4 to -0.4)                            | -12.5 (-19.1 to -5.2)               |
| Paraguay                            | 362.6 (343.7 to 384.2)     | 336.4 (303.8 to 375.1)     | 330.1 (281.7 to 388.6)     | 294.1 (231.0 to 363.3)     | -0.9 (-2.4 to 0.3)                             | -12.6 (-29.7 to 5.1)                |
| <b>North Africa and Middle East</b> |                            |                            |                            |                            |                                                |                                     |
| <b>North Africa and Middle East</b> |                            |                            |                            |                            |                                                |                                     |
| Afghanistan                         | 1224.2 (1045.3 to 1406.0)  | 982.1 (861.3 to 1115.0)    | 965.2 (844.2 to 1096.8)    | 833.9 (706.2 to 980.8)     | -1.1 (-1.8 to -0.4)                            | -15.1 (-23.3 to -6.2)               |
| Algeria                             | 359.4 (334.2 to 384.4)     | 283.4 (267.4 to 295.8)     | 276.5 (258.9 to 292.4)     | 231.4 (204.8 to 258.0)     | -1.4 (-2.0 to -0.7)                            | -18.3 (-26.2 to -9.8)               |
| Bahrain                             | 501.0 (483.6 to 520.9)     | 247.1 (230.9 to 263.2)     | 245.3 (224.7 to 267.1)     | 206.0 (156.9 to 263.1)     | -1.4 (-3.0 to 0.4)                             | -18.8 (-36.4 to 6.4)                |
| Egypt                               | 576.5 (557.8 to 598.0)     | 617.4 (594.0 to 641.9)     | 608.5 (552.7 to 674.0)     | 492.8 (419.8 to 574.8)     | -1.5 (-2.5 to -0.5)                            | -20.2 (-31.4 to -7.3)               |
| Iran                                | 345.3 (338.9 to 350.9)     | 300.4 (298.5 to 304.7)     | 287.2 (284.7 to 291.2)     | 260.8 (226.3 to 293.7)     | -1.0 (-1.9 to -0.1)                            | -13.2 (-24.8 to -2.1)               |
| Iraq                                | 768.9 (692.9 to 852.1)     | 291.8 (276.6 to 309.1)     | 274.0 (257.1 to 293.1)     | 227.8 (205.1 to 253.0)     | -1.7 (-2.2 to -1.0)                            | -21.9 (-28.6 to -14.5)              |
| Jordan                              | 475.2 (438.9 to 515.6)     | 258.1 (238.4 to 280.9)     | 256.2 (230.3 to 287.4)     | 222.2 (186.0 to 263.0)     | -1.0 (-2.0 to -0.1)                            | -14.0 (-26.2 to -2.0)               |
| Kuwait                              | 302.7 (298.2 to 306.9)     | 188.2 (183.9 to 192.3)     | 187.5 (176.3 to 199.2)     | 166.1 (117.6 to 234.4)     | -0.9 (-3.1 to 1.4)                             | -11.7 (-37.1 to 23.8)               |
| Lebanon                             | 429.8 (390.9 to 468.9)     | 360.6 (339.8 to 382.8)     | 357.7 (333.8 to 382.9)     | 322.1 (257.0 to 404.5)     | -0.8 (-2.3 to 0.8)                             | -10.7 (-28.8 to 12.7)               |
| Libya                               | 465.3 (426.9 to 509.7)     | 460.2 (407.8 to 517.7)     | 472.8 (413.2 to 536.1)     | 445.2 (376.2 to 514.9)     | -0.2 (-0.8 to 0.3)                             | -3.3 (-11.4 to 4.7)                 |

|                                               | Estimate in 2000 (95% UIs) | Estimate in 2015 (95% UIs) | Estimate in 2017 (95% UIs) | Estimate in 2020 (95% UIs) | Annualised rate of change, 2015-2020 (95% UIs) | Percent change, 2015-2020 (95% UIs) |
|-----------------------------------------------|----------------------------|----------------------------|----------------------------|----------------------------|------------------------------------------------|-------------------------------------|
| Morocco                                       | 589.3 (549.8 to 635.2)     | 473.5 (408.3 to 542.9)     | 460.6 (392.4 to 534.3)     | 366.2 (288.2 to 429.0)     | -1.7 (-2.2 to -1.2)                            | -22.7 (-28.0 to -16.8)              |
| Palestine                                     | 495.3 (466.9 to 525.2)     | 355.2 (339.4 to 371.2)     | 344.2 (323.2 to 364.2)     | 330.1 (269.4 to 404.2)     | 0.5 (-1.7 to 0.8)                              | -7.1 (-22.6 to 12.8)                |
| Oman                                          | 473.8 (402.4 to 558.6)     | 343.6 (286.3 to 402.2)     | 326.5 (271.8 to 384.5)     | 278.9 (211.6 to 353.3)     | -1.4 (-2.8 to -0.2)                            | -18.9 (-34.0 to -2.2)               |
| Qatar                                         | 434.0 (383.8 to 489.2)     | 237.3 (201.0 to 275.3)     | 230.4 (193.8 to 270.5)     | 198.2 (149.9 to 269.4)     | -1.3 (-2.9 to 0.5)                             | -16.5 (-35.3 to 7.0)                |
| Saudi Arabia                                  | 307.9 (275.5 to 349.0)     | 323.8 (287.4 to 367.7)     | 306.2 (272.4 to 352.8)     | 224.8 (165.8 to 297.6)     | -2.5 (-4.3 to -0.7)                            | -30.6 (-47.5 to -10.3)              |
| Sudan                                         | 660.0 (558.5 to 772.8)     | 512.6 (410.6 to 617.2)     | 498.7 (400.1 to 605.3)     | 379.0 (301.6 to 470.6)     | -2.0 (-2.6 to -1.3)                            | -26.0 (-32.7 to -17.8)              |
| Syria                                         | 564.4 (518.2 to 611.5)     | 422.1 (362.6 to 487.8)     | 418.7 (354.2 to 491.1)     | 359.0 (287.0 to 444.0)     | -1.1 (-2.0 to -0.1)                            | -15.0 (-26.3 to -1.1)               |
| Tunisia                                       | 372.8 (343.2 to 403.1)     | 288.2 (237.0 to 349.9)     | 281.8 (229.1 to 344.4)     | 239.7 (190.5 to 292.4)     | -1.2 (-1.9 to -0.6)                            | -16.8 (-24.4 to -8.7)               |
| Turkey                                        | 460.3 (438.4 to 482.5)     | 312.9 (295.6 to 330.4)     | 297.5 (272.9 to 323.3)     | 235.5 (199.8 to 272.0)     | -1.9 (-2.9 to -1.0)                            | -24.8 (-35.4 to -14.0)              |
| United Arab Emirates                          | 621.5 (555.4 to 698.6)     | 564.5 (471.4 to 674.8)     | 562.8 (460.3 to 680.6)     | 430.0 (353.8 to 517.4)     | -1.8 (-2.4 to -1.1)                            | -23.8 (-30.7 to -15.7)              |
| Yemen                                         | 757.8 (581.9 to 974.4)     | 598.1 (456.4 to 782.2)     | 603.2 (459.4 to 790.6)     | 533.3 (398.6 to 702.7)     | -0.8 (-1.4 to -0.1)                            | -10.8 (-19.2 to -1.6)               |
| <b>South Asia</b>                             |                            |                            |                            |                            |                                                |                                     |
| <b>South Asia</b>                             |                            |                            |                            |                            |                                                |                                     |
| Bangladesh                                    | 513.8 (484.6 to 544.1)     | 463.4 (423.9 to 505.0)     | 453.7 (407.6 to 502.7)     | 326.0 (273.7 to 379.2)     | -2.4 (-3.2 to -1.6)                            | -29.7 (-38.3 to -21.2)              |
| Bhutan                                        | 458.2 (403.5 to 516.9)     | 355.0 (291.9 to 415.8)     | 345.5 (284.5 to 411.9)     | 269.9 (213.0 to 329.0)     | -1.8 (-2.6 to -1.1)                            | -24.0 (-30.2 to -15.3)              |
| India                                         | 546.1 (519.2 to 564.7)     | 496.3 (477.0 to 508.8)     | 494.0 (473.9 to 508.1)     | 393.3 (329.3 to 464.2)     | -1.6 (-2.7 to -0.5)                            | -20.8 (-33.3 to -7.1)               |
| Nepal                                         | 471.2 (426.4 to 524.2)     | 458.9 (392.3 to 518.5)     | 453.5 (384.4 to 513.4)     | 340.0 (281.1 to 394.3)     | -2.0 (-2.6 to -1.4)                            | -25.9 (-32.2 to -18.9)              |
| Pakistan                                      | 735.8 (689.7 to 782.1)     | 657.5 (558.6 to 764.9)     | 644.1 (539.6 to 754.3)     | 517.1 (419.8 to 622.5)     | -1.6 (-2.5 to -1.0)                            | -21.4 (-31.5 to -13.3)              |
| <b>Southeast Asia, East Asia, and Oceania</b> |                            |                            |                            |                            |                                                |                                     |
| <b>East Asia</b>                              |                            |                            |                            |                            |                                                |                                     |
| China                                         | 442.0 (434.4 to 449.8)     | 364.1 (352.7 to 375.7)     | 344.4 (332.3 to 357.2)     | 266.6 (234.0 to 294.9)     | -2.1 (-2.9 to -1.4)                            | -26.8 (-35.2 to -19.0)              |
| North Korea                                   | 588.1 (508.6 to 662.8)     | 585.2 (508.4 to 653.7)     | 570.9 (497.6 to 639.3)     | 530.6 (448.8 to 608.0)     | -0.7 (-1.3 to -0.1)                            | -9.3 (-18.2 to -1.1)                |
| Taiwan (Province of China)                    | 333.7 (331.2 to 336.6)     | 252.3 (249.4 to 254.7)     | 255.6 (242.9 to 269.5)     | 222.0 (195.8 to 248.5)     | -0.9 (-1.7 to -0.1)                            | -12.0 (-22.4 to -1.6)               |
| <b>Oceania</b>                                |                            |                            |                            |                            |                                                |                                     |
| American Samoa                                | 593.7 (563.5 to 628.6)     | 565.6 (517.9 to 612.0)     | 561.9 (506.2 to 617.4)     | 484.2 (427.5 to 545.9)     | -1.0 (-1.7 to -0.5)                            | -14.4 (-22.2 to -6.7)               |
| Federated States of Micronesia                | 865.0 (773.2 to 967.2)     | 814.2 (675.7 to 943.7)     | 807.5 (654.0 to 942.4)     | 731.3 (585.0 to 886.0)     | -0.7 (-1.6 to 0.0)                             | -10.2 (-21.5 to 0.5)                |
| Fiji                                          | 1004.6 (989.3 to 1019.3)   | 877.0 (806.1 to 947.5)     | 864.2 (762.8 to 965.9)     | 749.6 (627.3 to 896.5)     | -1.1 (-2.0 to -0.0)                            | -14.6 (-25.4 to -0.7)               |
| Guam                                          | 516.6 (499.4 to 536.1)     | 539.1 (511.7 to 568.3)     | 538.0 (503.7 to 575.1)     | 449.2 (382.2 to 516.6)     | -1.2 (-2.2 to -0.4)                            | -16.7 (-27.2 to -5.8)               |
| Kiribati                                      | 1137.9 (1079.1 to 1202.4)  | 1062.2 (940.3 to 1203.3)   | 1041.2 (917.2 to 1183.8)   | 935.4 (810.9 to 1085.7)    | -0.9 (-1.4 to -0.3)                            | -11.9 (-19.9 to -4.0)               |
| Marshall Islands                              | 1178.2 (1111.3 to 1247.1)  | 1054.3 (940.4 to 1181.2)   | 1027.3 (907.7 to 1159.5)   | 880.8 (752.5 to 1024.4)    | -1.2 (-1.9 to -0.7)                            | -16.5 (-24.3 to -9.7)               |
| Northern Mariana Islands                      | 389.3 (354.2 to 427.3)     | 372.1 (335.4 to 410.4)     | 368.5 (330.3 to 405.9)     | 324.4 (280.0 to 369.0)     | -0.9 (-1.6 to -0.3)                            | -12.8 (-21.7 to -4.2)               |
| Papua New Guinea                              | 1486.3 (1304.0 to 1684.4)  | 1375.4 (1207.8 to 1588.0)  | 1375.4 (1181.3 to 1556.9)  | 1122.5 (969.6 to 1300.3)   | -1.4 (-1.8 to -1.0)                            | -18.4 (-23.6 to -13.4)              |
| Samoa                                         | 554.6 (496.6 to 620.6)     | 497.3 (440.0 to 547.0)     | 492.6 (435.0 to 548.1)     | 422.6 (366.5 to 475.3)     | -1.1 (-1.6 to -0.6)                            | -15.0 (-20.9 to -8.9)               |
| Solomon Islands                               | 891.8 (793.0 to 1005.3)    | 824.5 (732.9 to 925.2)     | 814.0 (721.6 to 917.8)     | 703.7 (608.5 to 815.0)     | -1.1 (-1.5 to -0.6)                            | -14.7 (-20.6 to -8.5)               |
| Tonga                                         | 555.1 (535.1 to 575.0)     | 543.1 (492.7 to 605.5)     | 536.5 (482.2 to 605.2)     | 471.1 (419.1 to 538.9)     | -1.0 (-1.3 to -0.6)                            | -13.3 (-17.3 to -9.1)               |
| Vanuatu                                       | 1002.3 (795.6 to 1235.2)   | 939.3 (750.3 to 1174.7)    | 931.7 (751.1 to 1163.2)    | 800.2 (631.0 to 1002.1)    | -1.1 (-1.6 to -0.6)                            | -14.8 (-20.8 to -8.7)               |
| <b>Southeast Asia</b>                         |                            |                            |                            |                            |                                                |                                     |
| Cambodia                                      | 594.4 (545.7 to 642.0)     | 437.1 (391.5 to 490.5)     | 429.0 (381.5 to 482.5)     | 338.5 (297.7 to 385.9)     | -1.7 (-2.1 to -1.3)                            | -22.6 (-27.4 to -17.4)              |
| Indonesia                                     | 535.4 (513.9 to 563.7)     | 520.9 (493.5 to 548.5)     | 506.4 (478.5 to 536.2)     | 400.4 (352.4 to 457.5)     | -1.8 (-2.5 to -1.0)                            | -23.1 (-31.5 to -14.0)              |
| Laos                                          | 826.5 (742.6 to 923.7)     | 587.8 (497.3 to 682.3)     | 566.7 (478.1 to 660.1)     | 415.9 (344.4 to 484.6)     | -2.3 (-2.7 to -1.9)                            | -29.2 (-33.6 to -24.5)              |
| Malaysia                                      | 452.9 (444.4 to 470.7)     | 364.5 (349.6 to 395.0)     | 367.4 (335.2 to 405.3)     | 272.9 (236.7 to 312.7)     | -1.9 (-2.8 to -1.2)                            | -25.2 (-34.2 to -16.3)              |
| Maldives                                      | 498.3 (482.5 to 511.8)     | 257.0 (216.3 to 237.1)     | 257.0 (210.3 to 237.1)     | 187.7 (152.2 to 233.9)     | -1.3 (-2.5 to 0.1)                             | -17.3 (-31.6 to -1.4)               |
| Mauritius                                     | 580.3 (570.5 to 590.7)     | 421.0 (412.6 to 429.4)     | 410.9 (385.9 to 437.5)     | 327.0 (281.8 to 372.1)     | -1.7 (-2.7 to -0.8)                            | -22.3 (-33.5 to -11.5)              |
| Myanmar                                       | 755.9 (666.6 to 855.5)     | 528.4 (468.2 to 591.5)     | 510.2 (448.6 to 572.7)     | 379.5 (326.1 to 435.0)     | -2.2 (-2.8 to -1.7)                            | -28.2 (-34.2 to -22.0)              |
| Philippines                                   | 481.6 (456.4 to 507.8)     | 556.1 (517.6 to 598.2)     | 543.1 (473.3 to 614.0)     | 439.6 (371.1 to 517.0)     | -1.6 (-2.5 to -0.7)                            | -21.0 (-31.7 to -9.5)               |
| Sri Lanka                                     | 443.3 (435.4 to 463.4)     | 301.7 (265.5 to 337.5)     | 287.9 (240.9 to 335.9)     | 232.0 (182.9 to 289.4)     | -1.8 (-3.2 to -0.4)                            | -23.1 (-37.9 to -6.4)               |
| Seychelles                                    | 536.0 (517.9 to 553.5)     | 423.1 (408.1 to 437.6)     | 422.0 (402.4 to 441.9)     | 341.6 (296.0 to 394.8)     | -1.4 (-2.3 to -0.5)                            | -19.3 (-29.4 to -7.3)               |
| Thailand                                      | 385.4 (366.0 to 405.9)     | 250.7 (235.6 to 270.5)     | 252.8 (226.7 to 281.6)     | 220.7 (194.0 to 251.6)     | -0.9 (-1.7 to -0.1)                            | -11.9 (-22.2 to -1.1)               |
| Timor-Leste                                   | 509.7 (386.9 to 580.7)     | 460.3 (369.4 to 528.5)     | 470.5 (382.0 to 542.3)     | 388.1 (304.4 to 473.6)     | -1.2 (-1.9 to -0.3)                            | -15.7 (-25.2 to -4.6)               |
| Vietnam                                       | 482.8 (443.5 to 522.4)     | 425.2 (380.1 to 483.4)     | 419.5 (372.0 to 482.9)     | 337.3 (293.8 to 393.4)     | -1.6 (-2.0 to -1.0)                            | -20.7 (-26.2 to -14.2)              |
| <b>Sub-Saharan Africa</b>                     |                            |                            |                            |                            |                                                |                                     |
| <b>Central Sub-Saharan Africa</b>             |                            |                            |                            |                            |                                                |                                     |
| Angola                                        | 646.1 (563.0 to 736.3)     | 454.5 (390.6 to 517.1)     | 444.0 (377.4 to 512.9)     | 361.4 (298.5 to 444.3)     | -1.5 (-2.3 to -0.5)                            | -20.5 (-29.1 to -7.8)               |
| Central African Republic                      | 849.6 (712.0 to 977.6)     | 761.3 (615.1 to 885.9)     | 743.9 (595.1 to 868.6)     | 784.8 (607.5 to 996.3)     | 0.2 (-0.8 to 1.3)                              | 3.1 (-1.0 to 20.7)                  |
| Congo                                         | 775.2 (693.2 to 857.8)     | 552.8 (469.7 to 635.5)     | 546.8 (461.7 to 632.1)     | 456.7 (349.4 to 592.8)     | -1.3 (-2.7 to 0.2)                             | -17.4 (-33.5 to 3.3)                |
| Democratic Republic of the Congo              | 531.1 (455.4 to 597.4)     | 481.9 (405.0 to 559.4)     | 474.6 (397.7 to 550.8)     | 440.3 (359.3 to 529.4)     | -0.6 (-1.4 to 0.2)                             | -8.6 (-18.6 to 3.4)                 |
| Equatorial Guinea                             | 556.3 (407.8 to 728.0)     | 346.5 (227.1 to 510.3)     | 343.4 (227.5 to 484.7)     | 273.6 (181.0 to 413.7)     | -1.6 (-2.6 to -0.6)                            | -21.0 (-32.2 to -8.1)               |
| Gabon                                         | 571.8 (503.5 to 649.6)     | 445.4 (388.7 to 514.5)     | 432.7 (377.3 to 495.1)     | 391.4 (315.4 to 478.4)     | -0.9 (-2.0 to 0.1)                             | -12.1 (-26.1 to 1.9)                |
| <b>Eastern Sub-Saharan Africa</b>             |                            |                            |                            |                            |                                                |                                     |
| Burundi                                       | 707.4 (612.6 to 807.0)     | 470.5 (394.8 to 548.4)     | 463.2 (385.9 to 543.4)     | 423.1 (318.9 to 548.5)     | -0.7 (-2.2 to 0.7)                             | -10.1 (-28.0 to 11.7)               |
| Comoros                                       | 577.4 (505.3 to 655.3)     | 439.8 (378.6 to 511.1)     | 434.7 (371.6 to 505.7)     | 404.4 (337.9 to 479.2)     | -0.6 (-1.1 to 0.1)                             | -8.0 (-15.6 to 1.3)                 |
| Dibouti                                       | 565.8 (419.6 to 749.3)     | 462.9 (333.4 to 629.6)     | 454.8 (330.7 to 614.6)     | 418.8 (294.9 to 575.5)     | -0.7 (-1.6 to 0.2)                             | -9.4 (-21.0 to 2.3)                 |
| Eritrea                                       | 840.4 (731.1 to 946.6)     | 649.0 (543.8 to 758.3)     | 612.0 (513.8 to 718.2)     | 569.2 (460.3 to 677.8)     | -0.9 (-1.7 to -0.3)                            | -12.3 (-22.0 to -3.9)               |
| Ethiopia                                      | 547.3 (504.5 to 594.1)     | 327.2 (302.1 to 350.9)     | 317.9 (291.8 to 343.1)     | 263.8 (225.9 to 300.4)     | -1.4 (-2.3 to -0.7)                            | -19.4 (-28.9 to -9.4)               |
| Kenya                                         | 425.1 (390.4 to 464.6)     | 372.9 (345.1 to 398.4)     | 362.1 (335.0 to 388.9)     | 331.9 (282.4 to 403.1)     | -0.8 (-1.7 to 0.5)                             | -11.0 (-22.7 to 7.2)                |
| Madagascar                                    | 729.8 (660.3 to 800.3)     | 631.1 (528.3 to 735.9)     | 618.4 (516.1 to 725.6)     | 564.4 (466.0 to 669.3)     | -0.7 (-1.2 to -0.4)                            | -10.6 (-16.6 to -5.3)               |
| Malawi                                        | 595.8 (525.8 to 667.7)     | 421.6 (369.8 to 472.7)     | 412.5 (357.6 to 469.9)     | 393.7 (306.3 to 502.0)     | -0.5 (-1.9 to 1.0)                             | -6.6 (-24.5 to 16.5)                |
| Mozambique                                    | 601.1 (534.7 to 666.6)     | 602.4 (522.4 to 685.6)     | 581.3 (500.2 to 664.5)     | 517.7 (419.1 to 629.5)     | -1.0 (-2.0 to 0.1)                             | -14.0 (-26.1 to 0.9)                |
| Rwanda                                        | 624.8 (561.5 to 689.7)     | 333.1 (291.6 to 379.6)     | 326.4 (283.3 to 377.1)     | 281.3 (195.2 to 399.6)     | -1.2 (-3.3 to 1.1)                             | -15.6 (-39.0 to 18.4)               |
| Somalia                                       | 781.8 (604.1 to 971.5)     | 623.2 (482.8 to 803.4)     | 621.5 (471.8 to 790.7)     | 649.5 (488.6 to 837.2)     | 0.2 (-0.3 to 0.7)                              | 2.8 (-4.7 to 11.2)                  |
| South Sudan                                   | 595.7 (441.2 to 766.7)     | 499.1 (375.4 to 662.3)     | 509.9 (379.0 to 671.9)     | 509.4 (363.8 to 692.9)     | 0.1 (-0.8 to 1.2)                              | 2.1 (-10.9 to 19.0)                 |
| Tanzania                                      | 415.7 (369.6 to 466.1)     | 360.6 (319.2 to 406.9)     | 359.8 (315.4 to 406.9)     | 314.7 (269.2 to 363.2)     | -0.9 (-1.5 to -0.2)                            | -12.7 (-20.4 to -5.5)               |
| Uganda                                        | 556.5 (487.0 to 632.0)     | 404.6 (352.8 to 459.9)     | 392.9 (340.4 to 449.3)     | 370.1 (303.7 to 443.6)     | -0.6 (-1.4 to 0.2)                             | -8.5 (-19.4 to 3.5)                 |
| Zambia                                        | 640.5 (576.9 to 703.0)     | 435.8 (381.0 to 490.1)     | 430.7 (375.7 to 488.1)     | 375.5 (249.6 to 497.1)     | -1.1 (-3.7 to 0.7)                             | -13.8 (-42.8 to 10.4)               |
| <b>Southern Sub-Saharan Africa</b>            |                            |                            |                            |                            |                                                |                                     |
| Botswana                                      | 391.7 (313.1 to 474.8)     | 369.5 (334.5 to 416.9)     | 348.3 (316.2 to 392.2)     | 334.9 (243.8 to 496.0)     | -0.8 (-2.7 to 1.9)                             | -9.3 (-32.9 to 33.3)                |
| Lesotho                                       | 739.4 (643.6 to 829.0)     | 815.2 (666.0 to 945.4)     | 748.8 (614.6 to 872.2)     | 745.7 (526.7 to 1042.3)    | -0.7 (-2.6 to 1.4)                             | -8.5 (-32.4 to 23.5)                |
| Namibia                                       | 703.2 (638.9 to 767.8)     | 385.8 (334.5 to 447.0)     | 379.7 (327.8 to 443.6)     | 309.1 (235.3 to 407.4)     | -1.5 (-3.0 to 0.1)                             | -19.9 (-36.0 to 1.1)                |
| South Africa                                  | 677.4 (661.4 to 693.0)     | 415.6 (401.9 to 429.4)     | 389.3 (375.6 to 403.4)     | 355.1 (259.2 to 486.8)     | -1.1 (-3.1 to 1.1)                             | -14.5 (-37.1 to 17.8)               |
| Swaziland                                     | 808.3 (701.6 to 908.8)     | 731.9 (593.5 to 869.6)     | 664.8 (547.1 to 791.6)     | 628.5 (418.2 to 925.1)     | -1.1 (-3.6 to 1.5)                             | -14.0 (-41.3 to 24.5)               |

|                                                                                               | Estimate in 2000 (95% UIs) | Estimate in 2015 (95% UIs) | Estimate in 2017 (95% UIs) | Estimate in 2030 (95% UIs) | Annualised rate of change, 2015-2030 (95% UIs) | Percent change, 2015-2030 (95% UIs) |
|-----------------------------------------------------------------------------------------------|----------------------------|----------------------------|----------------------------|----------------------------|------------------------------------------------|-------------------------------------|
| Zimbabwe                                                                                      | 673.7 (601.0 to 741.4)     | 609.4 (528.5 to 687.2)     | 583.2 (498.2 to 664.3)     | 623.5 (383.1 to 1078.3)    | 0.0 (-3.0 to 3.7)                              | 3.3 (-36.2 to 75.0)                 |
| <b>Western Sub-Saharan Africa</b>                                                             |                            |                            |                            |                            |                                                |                                     |
| Benin                                                                                         | 455.1 (403.0 to 512.0)     | 402.7 (334.7 to 485.4)     | 393.1 (323.8 to 475.7)     | 345.3 (278.9 to 425.2)     | -1.0 (-1.7 to -0.4)                            | -14.3 (-22.7 to -5.2)               |
| Burkina Faso                                                                                  | 456.0 (399.1 to 522.3)     | 438.8 (384.8 to 499.0)     | 435.1 (378.7 to 495.8)     | 394.0 (335.5 to 458.0)     | -0.7 (-1.3 to -0.2)                            | -10.2 (-17.8 to -3.1)               |
| Cameroun                                                                                      | 548.0 (486.0 to 613.5)     | 458.8 (370.8 to 541.0)     | 436.3 (355.2 to 524.8)     | 370.9 (298.8 to 460.7)     | -1.4 (-2.0 to -0.6)                            | -18.2 (-25.8 to -8.4)               |
| Cape Verde                                                                                    | 308.9 (282.5 to 338.0)     | 284.3 (268.7 to 300.3)     | 283.9 (262.2 to 306.1)     | 248.6 (214.5 to 289.9)     | -0.9 (-1.8 to -0.2)                            | -12.6 (-23.3 to -3.5)               |
| Chad                                                                                          | 468.0 (412.8 to 526.6)     | 453.5 (390.4 to 521.8)     | 447.1 (382.8 to 522.7)     | 424.1 (350.4 to 505.5)     | -0.5 (-1.2 to 0.2)                             | -6.5 (-16.1 to 3.5)                 |
| Cote d'Ivoire                                                                                 | 565.4 (495.7 to 639.9)     | 476.1 (404.4 to 553.3)     | 455.7 (384.4 to 532.9)     | 377.6 (314.0 to 452.1)     | -1.6 (-2.2 to -1.0)                            | -20.7 (-27.8 to -13.8)              |
| The Gambia                                                                                    | 510.4 (435.9 to 594.2)     | 525.2 (447.9 to 606.1)     | 515.3 (439.2 to 595.1)     | 457.1 (376.5 to 540.1)     | -0.9 (-1.5 to -0.3)                            | -13.0 (-20.2 to -4.4)               |
| Ghana                                                                                         | 484.9 (425.1 to 550.2)     | 467.3 (411.5 to 528.0)     | 454.0 (396.3 to 516.4)     | 382.2 (324.6 to 455.5)     | -1.3 (-2.0 to -0.7)                            | -18.2 (-25.5 to -9.7)               |
| Guinea                                                                                        | 525.9 (471.9 to 583.4)     | 593.3 (509.7 to 675.1)     | 579.8 (492.0 to 669.6)     | 536.3 (428.8 to 649.7)     | -0.7 (-1.6 to 0.2)                             | -9.6 (-21.7 to 2.8)                 |
| Guinea-Bissau                                                                                 | 742.1 (648.7 to 836.8)     | 677.6 (579.0 to 775.1)     | 656.2 (563.1 to 756.2)     | 573.2 (485.5 to 672.2)     | -1.1 (-1.5 to -0.6)                            | -15.4 (-20.5 to -9.3)               |
| Liberia                                                                                       | 446.4 (395.6 to 498.2)     | 422.5 (357.9 to 490.5)     | 414.9 (350.5 to 484.9)     | 394.9 (318.0 to 486.9)     | -0.5 (-1.3 to 0.4)                             | -6.5 (-17.7 to 5.6)                 |
| Mali                                                                                          | 518.3 (465.5 to 570.1)     | 435.6 (374.1 to 504.4)     | 434.6 (371.7 to 506.9)     | 376.8 (315.5 to 452.7)     | -1.0 (-1.7 to -0.3)                            | -13.5 (-23.0 to -4.6)               |
| Mauritania                                                                                    | 460.2 (406.9 to 520.7)     | 372.1 (312.8 to 435.7)     | 364.8 (304.4 to 429.1)     | 300.8 (246.7 to 360.6)     | -1.4 (-2.1 to -0.7)                            | -19.2 (-27.3 to -10.4)              |
| Niger                                                                                         | 439.8 (390.2 to 495.9)     | 394.5 (331.9 to 483.5)     | 391.8 (328.7 to 474.2)     | 373.5 (308.7 to 452.5)     | -0.4 (-0.8 to 0.2)                             | -5.3 (-11.8 to 2.3)                 |
| Nigeria                                                                                       | 313.1 (210.2 to 428.4)     | 267.6 (188.3 to 380.3)     | 270.4 (193.2 to 379.1)     | 229.1 (163.6 to 324.7)     | -1.0 (-1.8 to -0.3)                            | -14.2 (-24.2 to -4.1)               |
| Sao Tome and Principe                                                                         | 452.9 (405.4 to 507.5)     | 447.1 (392.6 to 503.8)     | 440.8 (384.7 to 500.9)     | 352.4 (284.9 to 432.2)     | -1.6 (-2.6 to -0.6)                            | -21.2 (-32.4 to -7.9)               |
| Senegal                                                                                       | 431.5 (392.9 to 476.2)     | 418.7 (365.9 to 478.1)     | 417.5 (361.8 to 479.0)     | 365.9 (307.9 to 432.2)     | -0.9 (-1.6 to -0.1)                            | -12.6 (-21.4 to -1.8)               |
| Sierra Leone                                                                                  | 524.2 (467.3 to 582.0)     | 508.7 (432.3 to 597.3)     | 494.4 (416.8 to 582.6)     | 446.4 (356.4 to 554.3)     | -0.9 (-1.9 to 0.1)                             | -12.3 (-25.2 to 1.7)                |
| Togo                                                                                          | 499.3 (427.5 to 568.9)     | 451.4 (374.9 to 537.7)     | 445.1 (370.0 to 529.3)     | 382.2 (302.3 to 466.8)     | -1.1 (-2.0 to -0.2)                            | -15.3 (-26.0 to -3.2)               |
| <b>Indicator 3.4.2: Age-standardised death rate due to self-harm (per 100,000 population)</b> |                            |                            |                            |                            |                                                |                                     |
| <b>Central Europe, Eastern Europe, and Central Asia</b>                                       |                            |                            |                            |                            |                                                |                                     |
| <b>Central Asia</b>                                                                           |                            |                            |                            |                            |                                                |                                     |
| Armenia                                                                                       | 3.6 (3.5 to 3.8)           | 8.4 (8.0 to 8.8)           | 8.1 (7.6 to 8.6)           | 7.3 (5.6 to 9.7)           | -1.0 (-2.5 to 1.0)                             | -13.2 (-31.5 to 17.0)               |
| Azerbaijan                                                                                    | 3.1 (2.8 to 3.8)           | 4.1 (3.1 to 4.7)           | 4.0 (3.0 to 4.6)           | 3.8 (2.6 to 5.0)           | -0.7 (-2.3 to 1.0)                             | -8.7 (-29.0 to 15.9)                |
| Georgia                                                                                       | 5.3 (5.0 to 5.7)           | 7.3 (6.9 to 7.7)           | 7.3 (6.8 to 7.9)           | 7.2 (5.4 to 9.6)           | -0.1 (-2.0 to 1.7)                             | -1.2 (-25.7 to 29.6)                |
| Kazakhstan                                                                                    | 32.8 (31.8 to 33.9)        | 22.4 (21.4 to 23.7)        | 22.5 (20.7 to 24.7)        | 24.1 (16.1 to 33.9)        | 0.4 (-2.0 to 2.8)                              | 6.1 (-26.2 to 51.6)                 |
| Kyrgyzstan                                                                                    | 16.8 (15.8 to 18.0)        | 10.6 (10.0 to 11.2)        | 9.8 (9.1 to 10.9)          | 9.7 (7.0 to 13.0)          | -0.6 (-2.7 to 1.3)                             | -7.8 (-33.3 to 22.0)                |
| Mongolia                                                                                      | 20.3 (17.9 to 22.4)        | 15.5 (13.3 to 17.3)        | 15.1 (12.7 to 17.4)        | 16.5 (12.7 to 21.1)        | 0.4 (-1.0 to 1.8)                              | 6.3 (-14.0 to 31.4)                 |
| Tajikistan                                                                                    | 4.3 (4.1 to 5.6)           | 5.5 (4.7 to 6.1)           | 5.5 (4.7 to 6.3)           | 5.5 (4.1 to 7.0)           | -0.1 (-1.7 to 1.4)                             | -1.1 (-22.6 to 23.4)                |
| Turkmenistan                                                                                  | 11.2 (10.7 to 11.7)        | 8.3 (7.8 to 8.9)           | 8.3 (7.7 to 9.4)           | 9.2 (6.9 to 12.7)          | 0.5 (-1.2 to 2.7)                              | 9.8 (-16.6 to 50.6)                 |
| Uzbekistan                                                                                    | 10.7 (10.2 to 11.2)        | 9.3 (8.6 to 10.2)          | 9.2 (8.1 to 10.4)          | 9.9 (7.6 to 12.9)          | 0.3 (-1.3 to 2.0)                              | 6.1 (-17.4 to 34.8)                 |
| <b>Central Europe</b>                                                                         |                            |                            |                            |                            |                                                |                                     |
| Albania                                                                                       | 4.8 (4.3 to 5.3)           | 5.1 (3.9 to 6.2)           | 5.0 (3.8 to 6.2)           | 4.7 (3.3 to 6.5)           | -0.6 (-2.3 to 1.1)                             | -7.2 (-29.2 to 18.5)                |
| Bosnia and Herzegovina                                                                        | 8.5 (7.4 to 9.9)           | 6.9 (6.3 to 8.3)           | 6.7 (6.0 to 8.3)           | 6.9 (5.7 to 8.5)           | 0.0 (-1.0 to 1.1)                              | 0.4 (-14.4 to 17.2)                 |
| Bulgaria                                                                                      | 15.2 (14.8 to 15.7)        | 9.1 (8.6 to 9.5)           | 9.3 (8.6 to 10.0)          | 8.6 (6.8 to 10.8)          | -0.4 (-1.8 to 1.1)                             | -5.0 (-24.1 to 17.6)                |
| Croatia                                                                                       | 16.4 (15.9 to 16.9)        | 11.8 (11.4 to 12.3)        | 10.8 (10.1 to 11.6)        | 9.8 (8.4 to 11.4)          | -1.3 (-2.2 to -0.3)                            | -17.1 (-28.4 to -4.2)               |
| Czech Republic                                                                                | 13.7 (13.3 to 14.1)        | 11.0 (10.6 to 11.4)        | 10.6 (9.8 to 11.4)         | 9.1 (7.7 to 10.8)          | -1.2 (-2.3 to -0.2)                            | -16.7 (-28.9 to -2.2)               |
| Hungary                                                                                       | 23.2 (22.6 to 23.9)        | 15.9 (15.4 to 16.4)        | 14.0 (13.1 to 15.0)        | 11.9 (9.3 to 15.2)         | -2.0 (-3.5 to -0.5)                            | -25.1 (-41.2 to -9.3)               |
| Macedonia                                                                                     | 7.7 (7.2 to 9.0)           | 6.6 (6.0 to 7.3)           | 6.7 (6.0 to 7.5)           | 6.5 (5.3 to 8.0)           | -0.1 (-1.2 to 1.1)                             | -0.7 (-15.9 to 17.6)                |
| Montenegro                                                                                    | 11.0 (10.2 to 12.6)        | 9.5 (8.3 to 10.5)          | 9.2 (8.1 to 10.4)          | 8.2 (6.6 to 10.1)          | -0.9 (-2.1 to 0.2)                             | -12.9 (-26.9 to 2.7)                |
| Poland                                                                                        | 16.2 (15.7 to 16.7)        | 14.2 (13.7 to 14.8)        | 13.7 (12.6 to 14.8)        | 11.5 (9.7 to 13.3)         | -1.5 (-2.5 to -0.5)                            | -19.5 (-30.9 to -7.1)               |
| Romania                                                                                       | 10.3 (10.0 to 10.7)        | 9.1 (8.8 to 9.4)           | 9.0 (8.3 to 9.6)           | 7.2 (5.8 to 9.1)           | -1.6 (-3.1 to -0.1)                            | -21.0 (-36.8 to -0.9)               |
| Serbia                                                                                        | 18.8 (17.4 to 19.9)        | 13.2 (12.5 to 14.8)        | 12.4 (11.3 to 14.2)        | 13.1 (10.6 to 17.3)        | -0.1 (-1.3 to 1.3)                             | -1.2 (-18.1 to 20.7)                |
| Slovakia                                                                                      | 12.8 (11.0 to 13.5)        | 10.2 (8.7 to 11.0)         | 9.3 (7.9 to 10.7)          | 8.3 (6.8 to 11.0)          | -1.4 (-2.5 to -0.3)                            | -18.3 (-31.3 to -4.1)               |
| Slovenia                                                                                      | 24.8 (24.0 to 25.5)        | 14.3 (13.7 to 15.0)        | 14.1 (12.8 to 15.3)        | 12.0 (9.5 to 14.9)         | -1.2 (-2.7 to 0.3)                             | -16.0 (-33.1 to 4.7)                |
| <b>Eastern Europe</b>                                                                         |                            |                            |                            |                            |                                                |                                     |
| Belarus                                                                                       | 33.1 (32.0 to 34.3)        | 19.2 (17.9 to 20.9)        | 18.7 (16.8 to 20.8)        | 19.6 (13.8 to 26.1)        | 0.1 (-2.0 to 1.9)                              | 2.1 (-25.4 to 32.7)                 |
| Estonia                                                                                       | 27.5 (26.4 to 28.5)        | 12.8 (12.0 to 13.8)        | 12.5 (10.6 to 14.7)        | 12.4 (7.4 to 19.3)         | -0.4 (-3.7 to 2.6)                             | -3.1 (-42.6 to 47.6)                |
| Latvia                                                                                        | 27.6 (26.6 to 28.6)        | 16.8 (16.0 to 17.8)        | 16.7 (14.5 to 19.0)        | 16.1 (9.6 to 25.5)         | -0.5 (-3.8 to 2.8)                             | -4.0 (-43.2 to 51.7)                |
| Lithuania                                                                                     | 39.6 (38.5 to 41.1)        | 28.9 (27.8 to 30.0)        | 27.4 (25.3 to 29.6)        | 28.3 (20.3 to 39.0)        | -0.2 (-2.4 to 1.9)                             | -2.0 (-30.1 to 33.7)                |
| Moldova                                                                                       | 16.6 (16.0 to 17.2)        | 14.3 (13.7 to 14.9)        | 13.4 (12.4 to 14.2)        | 14.8 (10.0 to 21.0)        | 0.1 (-2.4 to 2.6)                              | 3.5 (-30.2 to 46.7)                 |
| Russia                                                                                        | 43.3 (42.5 to 43.9)        | 26.1 (25.5 to 26.7)        | 24.6 (23.8 to 25.3)        | 24.4 (15.0 to 38.8)        | -0.6 (-3.7 to 2.6)                             | -6.7 (-42.5 to 48.6)                |
| Ukraine                                                                                       | 29.0 (28.1 to 30.0)        | 27.9 (26.5 to 30.1)        | 25.1 (23.1 to 27.9)        | 26.8 (16.1 to 40.4)        | -0.5 (-3.6 to 2.5)                             | -4.1 (-41.9 to 46.2)                |
| <b>High-income</b>                                                                            |                            |                            |                            |                            |                                                |                                     |
| <b>Australasia</b>                                                                            |                            |                            |                            |                            |                                                |                                     |
| Australia                                                                                     | 12.2 (11.9 to 12.5)        | 11.1 (10.7 to 11.4)        | 10.8 (9.6 to 12.2)         | 9.8 (8.0 to 12.1)          | -0.8 (-2.2 to 0.6)                             | -11.2 (-28.1 to 9.1)                |
| New Zealand                                                                                   | 12.9 (12.5 to 13.4)        | 10.7 (10.3 to 11.2)        | 10.8 (9.6 to 12.2)         | 9.3 (8.1 to 10.8)          | -0.9 (-1.8 to 0.1)                             | -12.9 (-24.0 to 0.8)                |
| <b>High-income Asia Pacific</b>                                                               |                            |                            |                            |                            |                                                |                                     |
| Brunei                                                                                        | 3.9 (3.5 to 5.5)           | 6.0 (5.2 to 6.7)           | 6.1 (5.3 to 6.9)           | 5.5 (4.5 to 6.6)           | -0.6 (-1.5 to 0.3)                             | -8.3 (-20.0 to 4.7)                 |
| Japan                                                                                         | 17.7 (17.6 to 17.9)        | 15.4 (15.0 to 16.1)        | 15.3 (14.7 to 16.2)        | 13.6 (11.8 to 15.5)        | -0.8 (-1.8 to 0.0)                             | -11.7 (-23.2 to 0.3)                |
| South Korea                                                                                   | 18.1 (17.7 to 18.5)        | 22.0 (20.9 to 23.0)        | 20.4 (18.7 to 22.1)        | 15.6 (12.6 to 18.9)        | -2.3 (-3.6 to -1.0)                            | -29.1 (-41.6 to -14.5)              |
| Singapore                                                                                     | 11.5 (10.6 to 12.4)        | 7.5 (7.2 to 7.8)           | 7.2 (6.6 to 7.8)           | 6.9 (5.8 to 8.1)           | -0.5 (-1.7 to 0.5)                             | -7.4 (-22.7 to 8.4)                 |
| <b>High-income North America</b>                                                              |                            |                            |                            |                            |                                                |                                     |
| Canada                                                                                        | 12.0 (11.7 to 12.3)        | 11.1 (10.7 to 11.5)        | 10.7 (9.9 to 11.5)         | 9.9 (8.6 to 11.3)          | -0.7 (-1.7 to 0.1)                             | -10.3 (-22.1 to 1.1)                |
| Greenland                                                                                     | 77.1 (73.0 to 84.0)        | 51.7 (48.0 to 57.7)        | 50.1 (45.8 to 56.5)        | 50.6 (36.8 to 72.4)        | -0.2 (-2.3 to 2.2)                             | -1.2 (-29.7 to 38.7)                |
| United States                                                                                 | 10.7 (10.6 to 10.8)        | 12.3 (12.0 to 13.0)        | 12.6 (12.0 to 13.0)        | 11.2 (8.5 to 14.0)         | -0.6 (-2.4 to 0.9)                             | -8.5 (-30.1 to 13.9)                |
| <b>Southern Latin America</b>                                                                 |                            |                            |                            |                            |                                                |                                     |
| Argentina                                                                                     | 12.1 (11.7 to 12.5)        | 10.4 (9.9 to 10.8)         | 10.4 (9.1 to 11.9)         | 9.3 (7.9 to 11.2)          | -0.7 (-1.8 to 0.5)                             | -9.9 (-23.9 to 7.7)                 |
| Chile                                                                                         | 12.6 (12.2 to 13.0)        | 9.9 (9.6 to 10.3)          | 9.9 (8.7 to 11.3)          | 10.2 (8.3 to 12.3)         | 0.2 (-1.1 to 1.3)                              | 3.4 (-15.4 to 22.3)                 |
| Uruguay                                                                                       | 16.2 (15.7 to 16.8)        | 16.8 (16.2 to 17.4)        | 16.5 (14.6 to 18.7)        | 14.8 (12.1 to 18.0)        | -0.9 (-2.2 to 0.4)                             | -11.5 (-27.7 to 6.4)                |
| <b>Western Europe</b>                                                                         |                            |                            |                            |                            |                                                |                                     |
| Andorra                                                                                       | 9.3 (7.9 to 11.2)          | 7.8 (6.5 to 9.4)           | 7.8 (6.4 to 9.4)           | 7.0 (5.6 to 8.7)           | -0.8 (-1.4 to -0.2)                            | -10.7 (-18.8 to -2.6)               |
| Austria                                                                                       | 15.6 (15.2 to 16.0)        | 11.5 (11.2 to 11.9)        | 11.0 (10.2 to 11.9)        | 9.5 (8.2 to 10.9)          | -1.3 (-2.3 to -0.4)                            | -17.4 (-28.8 to -5.5)               |
| Belgium                                                                                       | 18.1 (17.6 to 18.6)        | 14.6 (14.2 to 15.1)        | 14.0 (13.0 to 15.0)        | 12.8 (11.0 to 14.8)        | -0.9 (-1.9 to 0.1)                             | -12.5 (-24.7 to 0.9)                |
| Cyprus                                                                                        | 4.8 (4.2 to 6.5)           | 4.6 (4.0 to 5.2)           | 4.5 (3.9 to 5.2)           | 4.0 (3.2 to 4.9)           | -1.0 (-2.1 to 0.1)                             | -14.1 (-27.0 to 2.3)                |
| Denmark                                                                                       | 12.8 (12.4 to 13.2)        | 8.3 (7.9 to 8.7)           | 8.6 (8.0 to 9.3)           | 8.0 (6.5 to 9.7)           | -0.3 (-1.6 to 0.7)                             | -4.1 (-20.8 to 15.9)                |
| Finland                                                                                       | 20.7 (20.2 to 21.3)        | 12.4 (11.9 to 12.9)        | 12.7 (11.8 to 13.8)        | 11.5 (9.3 to 14.0)         | -0.5 (-1.9 to 0.8)                             | -7.2 (-24.7 to 12.2)                |
| France                                                                                        | 17.2 (16.8 to 17.6)        | 12.7 (12.2 to 13.3)        | 12.2 (11.2 to 13.2)        | 10.3 (9.0 to 11.7)         | -1.5 (-2.3 to -0.6)                            | -19.5 (-28.9 to -8.7)               |

|                                     | Estimate in 2000 (95% UIs) | Estimate in 2015 (95% UIs) | Estimate in 2017 (95% UIs) | Estimate in 2030 (95% UIs) | Annualized rate of change, 2015-2030 (95% UIs) | Percent change, 2015-2030 (95% UIs) |
|-------------------------------------|----------------------------|----------------------------|----------------------------|----------------------------|------------------------------------------------|-------------------------------------|
| Germany                             | 11.9 (11.6 to 12.2)        | 9.5 (9.2 to 9.8)           | 9.7 (8.6 to 11.0)          | 8.2 (6.9 to 9.6)           | -1.0 (-2.0 to 0.1)                             | -14.1 (-26.5 to 0.8)                |
| Greece                              | 3.0 (2.8 to 3.1)           | 3.6 (3.4 to 3.8)           | 3.8 (3.2 to 3.7)           | 2.8 (2.4 to 3.3)           | -1.6 (-2.6 to -0.7)                            | -31.0 (-31.8 to -10.0)              |
| Iceland                             | 11.5 (10.9 to 12.1)        | 9.7 (9.1 to 10.2)          | 9.4 (8.8 to 10.1)          | 9.4 (7.5 to 12.2)          | -0.2 (-1.7 to 1.5)                             | -2.3 (-22.1 to 25.8)                |
| Ireland                             | 12.5 (12.1 to 12.9)        | 8.6 (8.1 to 9.1)           | 8.2 (7.4 to 9.0)           | 7.3 (6.2 to 8.8)           | -1.1 (-2.1 to 0.1)                             | -14.7 (-27.2 to 0.9)                |
| Israel                              | 8.7 (8.4 to 9.0)           | 5.8 (5.5 to 6.0)           | 5.6 (5.2 to 6.1)           | 5.0 (4.1 to 6.1)           | -1.0 (-2.3 to 0.3)                             | -13.4 (-28.8 to 4.7)                |
| Italy                               | 6.2 (6.0 to 6.4)           | 5.0 (4.9 to 5.2)           | 4.7 (4.3 to 5.1)           | 3.9 (3.5 to 4.4)           | -1.7 (-2.4 to -1.0)                            | -22.4 (-30.7 to -13.9)              |
| Luxembourg                          | 12.2 (11.7 to 12.8)        | 8.8 (8.0 to 9.6)           | 8.5 (7.5 to 9.6)           | 8.0 (5.9 to 10.6)          | -0.7 (-2.4 to 1.0)                             | -8.8 (-30.4 to 16.0)                |
| Malta                               | 4.7 (4.4 to 4.9)           | 4.3 (4.0 to 4.5)           | 4.4 (4.1 to 4.8)           | 3.9 (3.2 to 4.9)           | -0.6 (-1.9 to 0.8)                             | -8.6 (-25.1 to 12.5)                |
| Netherlands                         | 9.4 (9.1 to 9.6)           | 9.0 (8.8 to 9.3)           | 9.0 (8.4 to 9.7)           | 8.0 (7.0 to 9.1)           | -0.9 (-1.7 to 0.0)                             | -11.8 (-22.3 to 0.1)                |
| Norway                              | 12.3 (12.0 to 12.6)        | 9.2 (8.8 to 9.6)           | 9.1 (8.7 to 9.6)           | 8.4 (7.2 to 9.9)           | -0.6 (-1.5 to 0.5)                             | -7.9 (-20.3 to 8.0)                 |
| Portugal                            | 9.8 (9.4 to 10.1)          | 7.6 (7.2 to 8.1)           | 7.5 (6.7 to 8.2)           | 6.2 (5.2 to 7.6)           | -1.4 (-2.5 to -0.2)                            | -18.5 (-31.6 to -3.4)               |
| Spain                               | 6.6 (6.4 to 6.8)           | 5.7 (5.5 to 5.9)           | 5.4 (5.0 to 5.8)           | 4.2 (3.4 to 5.2)           | -2.2 (-3.4 to -0.7)                            | -27.5 (-40.4 to -10.4)              |
| Sweden                              | 12.7 (12.3 to 13.0)        | 11.4 (11.1 to 11.7)        | 10.9 (10.2 to 11.6)        | 9.9 (8.6 to 11.5)          | -1.0 (-1.8 to 0.0)                             | -13.2 (-24.2 to 0.4)                |
| Switzerland                         | 16.0 (15.6 to 16.4)        | 9.8 (9.4 to 10.1)          | 9.1 (8.4 to 10.0)          | 8.4 (6.8 to 10.4)          | -1.0 (-2.4 to 0.4)                             | -13.8 (-30.3 to 6.2)                |
| United Kingdom                      | 8.3 (8.2 to 8.4)           | 7.1 (7.0 to 7.3)           | 7.2 (7.0 to 7.4)           | 6.4 (5.6 to 7.1)           | -0.7 (-1.6 to 0.1)                             | -10.4 (-21.3 to 1.8)                |
| <b>Latin America and Caribbean</b>  |                            |                            |                            |                            |                                                |                                     |
| <b>Andean Latin America</b>         |                            |                            |                            |                            |                                                |                                     |
| Bolivia                             | 8.0 (6.6 to 9.2)           | 6.4 (4.7 to 7.8)           | 6.3 (4.7 to 7.7)           | 6.1 (4.3 to 7.8)           | -0.3 (-1.2 to 0.5)                             | -4.8 (-15.9 to 8.3)                 |
| Ecuador                             | 7.5 (7.2 to 7.8)           | 9.3 (8.6 to 10.0)          | 9.0 (8.0 to 10.2)          | 8.1 (6.9 to 9.3)           | -0.9 (-1.9 to 0.0)                             | -12.8 (-24.3 to 0.1)                |
| Peru                                | 4.5 (3.8 to 5.0)           | 3.1 (2.6 to 3.5)           | 3.1 (2.5 to 3.7)           | 3.0 (2.2 to 3.8)           | -0.4 (-1.9 to 1.2)                             | -4.6 (-25.2 to 18.8)                |
| <b>Caribbean</b>                    |                            |                            |                            |                            |                                                |                                     |
| Antigua and Barbuda                 | 2.6 (2.4 to 2.8)           | 2.6 (2.4 to 2.9)           | 2.6 (2.3 to 2.9)           | 2.8 (2.1 to 3.9)           | 0.3 (-1.5 to 2.5)                              | 5.5 (-20.4 to 45.1)                 |
| The Bahamas                         | 3.1 (2.9 to 3.4)           | 3.1 (2.8 to 3.4)           | 3.1 (2.8 to 3.5)           | 2.9 (2.3 to 3.8)           | -0.5 (-1.8 to 1.2)                             | -6.0 (-23.7 to 20.0)                |
| Barbados                            | 4.5 (4.1 to 4.8)           | 3.9 (3.5 to 4.2)           | 3.9 (3.5 to 4.4)           | 3.9 (3.3 to 4.8)           | 0.1 (-0.8 to 1.1)                              | 1.3 (-11.9 to 18.1)                 |
| Belize                              | 8.9 (8.3 to 9.5)           | 7.4 (6.9 to 7.9)           | 7.7 (7.0 to 8.4)           | 7.4 (5.9 to 9.2)           | -0.1 (-1.4 to 1.5)                             | -0.3 (-19.2 to 25.5)                |
| Bermuda                             | 4.0 (3.7 to 4.3)           | 3.4 (3.1 to 3.8)           | 3.4 (3.0 to 3.8)           | 3.0 (2.0 to 4.8)           | -1.0 (-3.4 to 2.4)                             | -11.9 (-40.0 to 43.2)               |
| Cuba                                | 15.0 (14.6 to 15.4)        | 10.8 (10.4 to 11.3)        | 11.1 (9.8 to 12.6)         | 11.9 (9.7 to 14.3)         | 0.6 (-0.7 to 1.9)                              | 9.7 (-10.0 to 32.3)                 |
| Dominica                            | 4.3 (4.0 to 4.6)           | 4.4 (4.0 to 4.8)           | 4.5 (4.0 to 5.0)           | 4.3 (3.5 to 4.7)           | -0.2 (-1.3 to 1.2)                             | -2.5 (-18.2 to 19.4)                |
| Dominican Republic                  | 7.2 (5.7 to 8.1)           | 8.7 (6.8 to 10.0)          | 8.8 (6.6 to 10.4)          | 8.9 (6.4 to 11.2)          | 0.1 (-1.1 to 1.3)                              | 2.4 (-15.0 to 22.4)                 |
| Grenada                             | 4.9 (4.5 to 5.2)           | 4.7 (4.4 to 5.1)           | 4.8 (4.4 to 5.2)           | 4.6 (4.0 to 5.4)           | -0.1 (-1.0 to 0.8)                             | -1.7 (-13.3 to 12.3)                |
| Guyana                              | 22.8 (21.8 to 23.8)        | 26.8 (24.4 to 29.0)        | 25.6 (22.1 to 29.1)        | 24.0 (18.5 to 31.8)        | -0.8 (-2.2 to 1.0)                             | -10.4 (-28.2 to 16.3)               |
| Haiti                               | 9.3 (7.6 to 11.9)          | 8.5 (6.7 to 10.9)          | 8.4 (6.5 to 10.8)          | 8.4 (6.3 to 10.8)          | -0.1 (-0.8 to 0.6)                             | -1.6 (-10.9 to 9.3)                 |
| Jamaica                             | 2.3 (2.0 to 2.5)           | 3.7 (2.7 to 4.4)           | 3.5 (2.6 to 4.3)           | 3.5 (2.4 to 4.8)           | -0.4 (-1.9 to 1.4)                             | -5.7 (-24.4 to 22.8)                |
| Puerto Rico                         | 7.3 (7.0 to 7.7)           | 5.5 (5.2 to 5.9)           | 6.0 (5.4 to 6.6)           | 5.5 (4.6 to 7.7)           | -0.1 (-1.4 to 1.2)                             | -0.7 (-18.5 to 19.5)                |
| Saint Lucia                         | 7.0 (6.5 to 7.4)           | 6.5 (5.9 to 7.0)           | 6.8 (6.1 to 7.5)           | 6.2 (5.2 to 7.4)           | -0.3 (-1.3 to 0.8)                             | -4.2 (-17.3 to 12.0)                |
| Saint Vincent and the Grenadines    | 7.1 (6.6 to 7.6)           | 6.9 (6.3 to 7.4)           | 7.1 (6.4 to 7.8)           | 7.5 (6.2 to 9.5)           | 0.6 (-0.7 to 2.0)                              | 9.3 (-9.9 to 34.4)                  |
| Suriname                            | 24.3 (22.6 to 26.1)        | 24.3 (22.1 to 27.2)        | 24.3 (21.2 to 27.5)        | 24.0 (19.7 to 28.7)        | -0.2 (-1.1 to 0.8)                             | -2.2 (-15.8 to 12.8)                |
| Trinidad and Tobago                 | 12.6 (12.0 to 13.3)        | 9.8 (7.9 to 12.0)          | 9.9 (7.9 to 12.3)          | 11.3 (8.3 to 15.3)         | 0.9 (-0.8 to 2.8)                              | 15.7 (-10.9 to 51.7)                |
| Virgin Islands, U.S.                | 6.2 (5.7 to 6.7)           | 6.2 (5.3 to 6.9)           | 6.2 (5.3 to 7.1)           | 5.0 (4.0 to 6.1)           | -1.4 (-2.5 to -0.4)                            | -19.3 (-31.3 to -6.1)               |
| <b>Central Latin America</b>        |                            |                            |                            |                            |                                                |                                     |
| Colombia                            | 6.4 (6.2 to 6.7)           | 5.4 (5.0 to 5.7)           | 5.4 (4.7 to 6.2)           | 5.0 (3.9 to 6.2)           | -0.6 (-2.1 to 0.9)                             | -7.4 (-27.1 to 15.1)                |
| Costa Rica                          | 7.1 (6.8 to 7.4)           | 7.3 (6.8 to 7.7)           | 7.7 (6.8 to 8.4)           | 7.2 (6.2 to 8.4)           | -0.5 (-1.5 to 1.2)                             | -0.5 (-13.5 to 12.9)                |
| El Salvador                         | 10.2 (9.3 to 12.0)         | 9.9 (8.4 to 12.4)          | 9.6 (7.7 to 12.4)          | 10.4 (8.0 to 13.9)         | 0.3 (-1.0 to 1.7)                              | 5.2 (-13.8 to 28.4)                 |
| Guatemala                           | 13.9 (13.2 to 14.6)        | 5.2 (4.9 to 5.4)           | 5.8 (5.1 to 6.6)           | 6.8 (5.5 to 8.5)           | 1.8 (0.7 to 3.2)                               | 32.5 (10.4 to 62.0)                 |
| Honduras                            | 5.1 (4.0 to 6.9)           | 4.4 (3.1 to 6.0)           | 4.3 (3.1 to 6.0)           | 4.3 (3.0 to 6.0)           | -0.1 (-0.9 to 0.7)                             | -1.8 (-13.1 to 10.4)                |
| Mexico                              | 4.8 (4.7 to 4.9)           | 5.6 (5.5 to 5.7)           | 5.8 (5.5 to 6.0)           | 5.0 (4.2 to 6.3)           | -0.8 (-1.9 to 0.8)                             | -10.4 (-25.4 to 12.3)               |
| Nicaragua                           | 9.3 (7.5 to 10.3)          | 6.1 (5.6 to 7.0)           | 5.8 (4.9 to 6.8)           | 5.7 (4.6 to 7.0)           | -0.5 (-1.7 to 0.7)                             | -7.5 (-22.8 to 11.4)                |
| Panama                              | 6.1 (5.8 to 6.4)           | 4.9 (4.6 to 5.2)           | 4.9 (4.4 to 5.4)           | 5.0 (4.2 to 6.0)           | 0.2 (-0.9 to 1.4)                              | 3.0 (-12.5 to 22.5)                 |
| Venezuela                           | 9.9 (9.4 to 10.4)          | 8.4 (7.6 to 9.2)           | 8.5 (6.9 to 10.2)          | 8.6 (6.3 to 11.7)          | 0.1 (-1.6 to 2.1)                              | 2.8 (-21.5 to 36.2)                 |
| <b>Tropical Latin America</b>       |                            |                            |                            |                            |                                                |                                     |
| Brazil                              | 6.2 (6.1 to 6.3)           | 5.9 (5.7 to 6.0)           | 6.0 (5.7 to 6.2)           | 6.0 (5.3 to 6.8)           | 0.2 (-0.6 to 0.9)                              | 2.9 (-8.4 to 15.3)                  |
| Paraguay                            | 5.3 (4.2 to 5.8)           | 5.7 (4.1 to 6.7)           | 5.6 (4.0 to 7.0)           | 4.8 (3.3 to 6.3)           | -1.2 (-2.8 to 0.2)                             | -16.1 (-34.0 to 3.4)                |
| <b>North Africa and Middle East</b> |                            |                            |                            |                            |                                                |                                     |
| <b>North Africa and Middle East</b> |                            |                            |                            |                            |                                                |                                     |
| Afghanistan                         | 10.9 (8.3 to 14.4)         | 9.1 (7.4 to 12.4)          | 9.0 (7.3 to 12.3)          | 8.8 (7.0 to 11.7)          | -0.3 (-0.9 to 0.4)                             | -3.9 (-12.6 to 5.7)                 |
| Algeria                             | 5.2 (4.3 to 6.0)           | 4.2 (3.5 to 4.9)           | 4.0 (3.3 to 4.8)           | 3.8 (3.1 to 4.6)           | -0.7 (-1.3 to -0.0)                            | -9.3 (-17.3 to -0.0)                |
| Bahrain                             | 7.0 (5.8 to 7.7)           | 4.2 (3.5 to 5.0)           | 4.2 (3.4 to 5.0)           | 4.2 (3.1 to 5.6)           | -0.0 (-1.4 to 1.6)                             | -0.0 (-18.7 to 27.1)                |
| Egypt                               | 4.8 (3.9 to 5.7)           | 5.3 (3.9 to 6.3)           | 5.4 (4.0 to 6.6)           | 5.0 (3.6 to 6.3)           | -0.4 (-1.4 to 0.5)                             | -6.1 (-19.2 to 7.8)                 |
| Iran                                | 6.4 (5.8 to 7.0)           | 5.5 (4.8 to 5.9)           | 5.3 (4.7 to 5.7)           | 5.0 (4.1 to 5.8)           | -0.8 (-1.8 to 0.2)                             | -10.5 (-23.2 to 2.4)                |
| Iraq                                | 9.2 (7.2 to 11.5)          | 4.3 (3.9 to 4.9)           | 4.0 (3.6 to 4.6)           | 3.6 (3.1 to 4.2)           | -1.2 (-1.9 to -0.4)                            | -15.9 (-24.8 to -6.3)               |
| Jordan                              | 5.1 (4.5 to 5.8)           | 3.2 (2.8 to 3.6)           | 3.2 (2.7 to 3.7)           | 3.3 (2.6 to 4.0)           | 0.2 (-0.7 to 1.1)                              | 3.0 (-9.4 to 18.6)                  |
| Kuwait                              | 3.3 (3.1 to 3.5)           | 2.4 (2.2 to 2.7)           | 2.4 (2.2 to 2.8)           | 2.4 (1.6 to 3.5)           | -0.2 (-2.5 to 2.2)                             | -2.2 (-31.3 to 38.9)                |
| Lebanon                             | 5.0 (4.2 to 5.7)           | 4.7 (3.8 to 5.5)           | 4.7 (3.7 to 5.5)           | 4.8 (3.6 to 6.1)           | 0.1 (-1.1 to 1.3)                              | 1.6 (-4.6 to 22.1)                  |
| Libya                               | 6.8 (5.0 to 8.3)           | 8.2 (5.4 to 10.3)          | 7.9 (5.2 to 10.3)          | 7.7 (5.0 to 11.2)          | -0.4 (-1.1 to 0.2)                             | -6.2 (-15.2 to 3.0)                 |
| Morocco                             | 9.0 (7.9 to 10.3)          | 7.2 (6.0 to 8.7)           | 7.0 (5.7 to 8.4)           | 6.6 (5.3 to 8.0)           | -0.7 (-1.2 to -0.2)                            | -9.4 (-16.2 to -2.6)                |
| Palestine                           | 4.8 (3.7 to 5.5)           | 3.6 (2.7 to 4.0)           | 3.5 (2.5 to 3.9)           | 4.0 (2.7 to 5.5)           | 0.7 (-0.7 to 2.6)                              | 11.5 (-10.0 to 48.6)                |
| Oman                                | 3.4 (2.7 to 4.5)           | 3.0 (2.4 to 3.8)           | 2.9 (2.2 to 3.7)           | 3.0 (2.3 to 4.0)           | -0.0 (-1.0 to 0.9)                             | -0.1 (-13.8 to 14.3)                |
| Qatar                               | 6.3 (5.2 to 7.5)           | 4.5 (3.4 to 5.8)           | 4.5 (3.4 to 5.8)           | 4.7 (3.3 to 6.6)           | 0.2 (-1.2 to 1.9)                              | 4.4 (-6.1 to 33.5)                  |
| Saudi Arabia                        | 2.5 (2.1 to 3.0)           | 2.9 (2.2 to 3.7)           | 2.9 (2.2 to 3.7)           | 2.5 (1.8 to 3.3)           | -1.2 (-2.4 to -0.1)                            | -15.8 (-29.7 to -0.8)               |
| Sudan                               | 5.8 (4.3 to 8.0)           | 5.0 (3.9 to 6.5)           | 4.9 (3.8 to 6.3)           | 4.4 (3.4 to 5.8)           | -0.8 (-1.4 to -0.2)                            | -11.1 (-18.8 to -3.1)               |
| Syria                               | 3.2 (2.8 to 3.6)           | 3.0 (2.4 to 3.7)           | 3.0 (2.4 to 3.8)           | 2.8 (2.1 to 3.6)           | -0.5 (-1.4 to 0.4)                             | -7.1 (-19.0 to 6.0)                 |
| Tunisia                             | 3.6 (3.1 to 4.2)           | 3.1 (2.4 to 3.9)           | 3.0 (2.3 to 3.9)           | 2.9 (2.2 to 3.7)           | -0.4 (-1.1 to 0.2)                             | -4.1 (-15.4 to 3.4)                 |
| Turkey                              | 3.4 (3.0 to 4.0)           | 3.2 (2.8 to 3.6)           | 3.2 (2.8 to 3.7)           | 2.8 (2.3 to 3.5)           | -1.1 (-2.3 to 0.3)                             | -14.1 (-29.4 to 5.1)                |
| United Arab Emirates                | 4.7 (3.5 to 5.7)           | 5.0 (3.6 to 6.4)           | 5.0 (3.5 to 6.3)           | 4.4 (3.1 to 5.7)           | -0.9 (-1.7 to -0.2)                            | -12.5 (-22.3 to -2.7)               |
| Yemen                               | 6.7 (4.7 to 9.6)           | 5.8 (4.3 to 8.0)           | 5.9 (4.4 to 8.1)           | 5.4 (4.0 to 7.4)           | -0.5 (-1.1 to 0.1)                             | -6.9 (-15.2 to 1.3)                 |
| <b>South Asia</b>                   |                            |                            |                            |                            |                                                |                                     |
| <b>South Asia</b>                   |                            |                            |                            |                            |                                                |                                     |
| Bangladesh                          | 7.7 (6.9 to 8.8)           | 6.1 (5.2 to 6.9)           | 5.9 (5.0 to 6.8)           | 5.4 (4.3 to 6.5)           | -0.8 (-1.5 to -0.0)                            | -10.9 (-20.5 to -0.7)               |
| Bhutan                              | 7.0 (6.0 to 8.4)           | 5.7 (4.2 to 7.1)           | 5.6 (4.1 to 7.0)           | 5.3 (3.8 to 7.0)           | -0.6 (-1.1 to -0.1)                            | -8.0 (-15.1 to -1.2)                |
| India                               | 19.3 (16.3 to 20.8)        | 15.4 (12.7 to 16.4)        | 15.3 (12.8 to 16.4)        | 15.9 (12.6 to 18.4)        | 0.2 (-0.5 to 1.0)                              | 3.2 (-7.8 to 15.6)                  |

|                                               | Estimate in 2000 (95% UIs) | Estimate in 2015 (95% UIs) | Estimate in 2017 (95% UIs) | Estimate in 2020 (95% UIs) | Annualised rate of change, 2015-2020 (95% UIs) | Percent change, 2015-2020 (95% UIs) |
|-----------------------------------------------|----------------------------|----------------------------|----------------------------|----------------------------|------------------------------------------------|-------------------------------------|
| Nepal                                         | 9.2 (7.4 to 11.1)          | 8.4 (6.2 to 10.2)          | 8.2 (6.2 to 9.9)           | 8.0 (5.8 to 9.9)           | -0.4 (-0.9 to 0.2)                             | -5.2 (-13.1 to 3.6)                 |
| Pakistan                                      | 5.5 (4.8 to 6.2)           | 4.5 (3.7 to 5.4)           | 4.4 (3.6 to 5.3)           | 4.2 (3.3 to 5.2)           | -0.5 (-1.3 to 0.5)                             | -6.6 (-18.1 to 7.3)                 |
| <b>Southeast Asia, East Asia, and Oceania</b> |                            |                            |                            |                            |                                                |                                     |
| <b>East Asia</b>                              |                            |                            |                            |                            |                                                |                                     |
| China                                         | 14.0 (12.1 to 14.6)        | 7.3 (6.9 to 8.0)           | 7.1 (6.7 to 7.7)           | 7.1 (6.1 to 8.4)           | -0.2 (-1.0 to 0.8)                             | -2.1 (-14.5 to 12.3)                |
| North Korea                                   | 12.4 (10.2 to 15.2)        | 11.0 (8.6 to 14.0)         | 10.8 (8.5 to 14.1)         | 11.8 (9.1 to 15.6)         | 0.5 (0.3 to 1.3)                               | 8.0 (-3.8 to 22.2)                  |
| Taiwan (Province of China)                    | 13.6 (13.3 to 14.0)        | 12.9 (12.6 to 13.3)        | 13.3 (12.5 to 14.1)        | 12.9 (10.9 to 15.4)        | -0.0 (-1.2 to 1.1)                             | -0.0 (-16.7 to 18.2)                |
| <b>Oceania</b>                                |                            |                            |                            |                            |                                                |                                     |
| American Samoa                                | 6.5 (5.8 to 7.1)           | 6.7 (5.9 to 7.3)           | 6.6 (5.8 to 7.3)           | 6.5 (5.6 to 7.5)           | -0.1 (-0.8 to 0.6)                             | -1.9 (-11.2 to 8.7)                 |
| Federated States of Micronesia                | 18.9 (14.7 to 23.3)        | 16.8 (11.5 to 21.6)        | 16.7 (11.1 to 21.8)        | 17.2 (11.5 to 23.2)        | 0.1 (-0.7 to 1.0)                              | 2.4 (-10.1 to 16.0)                 |
| Fiji                                          | 10.8 (10.0 to 12.0)        | 9.8 (8.6 to 11.1)          | 9.6 (8.2 to 11.2)          | 10.5 (8.3 to 13.6)         | 0.5 (-0.7 to 2.0)                              | 7.7 (-9.7 to 34.4)                  |
| Guam                                          | 17.0 (15.7 to 18.5)        | 20.3 (18.2 to 22.3)        | 20.2 (17.8 to 22.4)        | 18.6 (14.9 to 22.9)        | -0.6 (-1.8 to 0.7)                             | -8.7 (-23.6 to 10.8)                |
| Kiribati                                      | 26.9 (22.8 to 30.4)        | 26.2 (20.2 to 32.1)        | 25.9 (19.9 to 31.8)        | 26.1 (19.8 to 32.4)        | -0.0 (-0.5 to 0.5)                             | -0.4 (-7.4 to 8.0)                  |
| Marshall Islands                              | 24.6 (19.6 to 29.8)        | 22.5 (17.3 to 28.2)        | 22.0 (16.8 to 27.9)        | 22.3 (16.1 to 28.6)        | -0.1 (-0.9 to 0.7)                             | -1.0 (-13.3 to 11.7)                |
| Northern Mariana Islands                      | 9.9 (8.6 to 11.2)          | 11.9 (10.2 to 13.6)        | 11.7 (9.6 to 14.2)         | 11.7 (9.6 to 14.2)         | -0.1 (-1.0 to 0.8)                             | -1.4 (-13.6 to 13.0)                |
| Papua New Guinea                              | 24.8 (17.2 to 34.0)        | 23.0 (15.4 to 31.3)        | 22.6 (15.1 to 30.6)        | 21.6 (14.4 to 29.4)        | -0.4 (-1.0 to 0.1)                             | -6.2 (-13.9 to 2.0)                 |
| Samoa                                         | 12.5 (10.1 to 14.7)        | 9.8 (7.9 to 12.3)          | 9.8 (7.9 to 12.3)          | 10.0 (7.9 to 12.3)         | 0.1 (-0.4 to 0.7)                              | 2.1 (-5.5 to 10.5)                  |
| Solomon Islands                               | 18.8 (14.4 to 24.2)        | 16.3 (12.7 to 20.5)        | 16.1 (12.4 to 20.2)        | 15.9 (12.0 to 20.4)        | -0.2 (-0.7 to 0.5)                             | -2.2 (-10.5 to 7.0)                 |
| Tonga                                         | 5.7 (5.1 to 6.3)           | 5.9 (5.0 to 6.8)           | 5.8 (4.9 to 6.8)           | 5.7 (4.9 to 6.7)           | -0.3 (-0.8 to 0.3)                             | -3.9 (-11.0 to 4.2)                 |
| Vanuatu                                       | 19.0 (13.2 to 25.1)        | 17.4 (11.6 to 23.9)        | 17.4 (11.4 to 23.9)        | 17.3 (11.4 to 23.8)        | -0.1 (-0.6 to 0.5)                             | -0.8 (-8.5 to 7.4)                  |
| <b>Southeast Asia</b>                         |                            |                            |                            |                            |                                                |                                     |
| Cambodia                                      | 5.6 (4.8 to 6.6)           | 4.5 (3.8 to 5.3)           | 4.5 (3.7 to 5.3)           | 4.4 (3.6 to 5.4)           | -0.2 (-0.9 to 0.5)                             | -2.7 (-13.2 to 8.5)                 |
| Indonesia                                     | 3.7 (3.2 to 4.0)           | 3.1 (2.8 to 3.4)           | 3.1 (2.7 to 3.4)           | 3.3 (2.7 to 3.8)           | 0.3 (0.4 to 1.0)                               | 5.1 (-6.0 to 15.7)                  |
| Laos                                          | 13.9 (10.6 to 18.1)        | 8.6 (5.9 to 11.1)          | 8.3 (5.7 to 10.7)          | 8.3 (5.7 to 11.1)          | -0.2 (-0.9 to 0.5)                             | -2.4 (-12.2 to 7.8)                 |
| Malaysia                                      | 8.8 (8.1 to 9.6)           | 7.5 (6.9 to 8.9)           | 7.7 (6.9 to 9.0)           | 7.3 (6.1 to 8.9)           | -0.2 (-1.2 to 0.8)                             | -2.8 (-16.6 to 13.0)                |
| Maldives                                      | 6.0 (4.9 to 7.1)           | 3.3 (2.8 to 3.8)           | 3.3 (2.7 to 3.8)           | 3.3 (2.4 to 4.5)           | -0.0 (-1.6 to 2.0)                             | 0.8 (-21.5 to 34.4)                 |
| Mauritius                                     | 10.9 (10.5 to 11.5)        | 8.6 (8.1 to 9.1)           | 8.2 (7.4 to 8.9)           | 8.5 (7.0 to 10.2)          | -0.1 (-1.3 to 1.1)                             | -1.0 (-17.4 to 18.6)                |
| Myanmar                                       | 6.9 (5.0 to 8.8)           | 5.1 (3.8 to 6.2)           | 5.0 (3.7 to 6.0)           | 4.8 (3.4 to 6.1)           | -0.4 (-1.3 to 0.6)                             | -5.1 (-17.3 to 8.6)                 |
| Philippines                                   | 4.8 (4.5 to 5.1)           | 6.0 (5.5 to 6.5)           | 5.9 (5.0 to 6.8)           | 6.2 (5.0 to 7.6)           | 0.3 (-0.9 to 1.5)                              | 4.3 (-12.9 to 24.8)                 |
| Sri Lanka                                     | 38.8 (36.4 to 41.4)        | 19.6 (16.8 to 25.1)        | 19.4 (15.6 to 25.3)        | 21.2 (14.6 to 30.3)        | 0.4 (-1.5 to 2.3)                              | 7.7 (-19.8 to 41.9)                 |
| Seychelles                                    | 9.1 (8.2 to 11.4)          | 7.7 (6.9 to 10.0)          | 7.9 (6.9 to 10.2)          | 7.8 (6.3 to 10.0)          | 0.0 (-1.1 to 1.2)                              | 1.0 (-14.8 to 19.4)                 |
| Thailand                                      | 16.5 (14.5 to 18.4)        | 9.8 (8.7 to 10.8)          | 10.2 (8.6 to 11.7)         | 10.7 (8.0 to 14.1)         | 0.5 (-1.3 to 2.5)                              | 8.9 (-17.4 to 45.1)                 |
| Timor-Leste                                   | 8.8 (4.5 to 12.1)          | 7.2 (4.0 to 9.6)           | 7.2 (4.1 to 9.6)           | 7.4 (4.1 to 9.9)           | 0.2 (-0.6 to 1.1)                              | 3.0 (-8.4 to 18.0)                  |
| Vietnam                                       | 8.4 (7.1 to 9.6)           | 7.3 (6.1 to 8.4)           | 7.3 (6.0 to 8.4)           | 7.6 (5.9 to 9.2)           | 0.2 (-0.7 to 1.1)                              | 3.6 (-9.7 to 18.5)                  |
| <b>Sub-Saharan Africa</b>                     |                            |                            |                            |                            |                                                |                                     |
| <b>Central Sub-Saharan Africa</b>             |                            |                            |                            |                            |                                                |                                     |
| Angola                                        | 15.5 (12.9 to 18.4)        | 11.9 (9.8 to 14.1)         | 11.7 (9.5 to 14.1)         | 13.2 (10.4 to 16.3)        | 0.6 (-0.2 to 1.6)                              | 10.5 (-2.4 to 27.4)                 |
| Central African Republic                      | 17.5 (13.4 to 21.8)        | 16.8 (12.5 to 21.2)        | 16.6 (12.4 to 21.0)        | 17.7 (12.8 to 23.3)        | 0.3 (-0.6 to 1.3)                              | 5.2 (-8.7 to 20.7)                  |
| Congo                                         | 16.9 (13.7 to 19.9)        | 13.7 (10.9 to 17.3)        | 13.7 (10.9 to 17.3)        | 13.5 (11.0 to 21.0)        | 0.8 (-0.6 to 2.2)                              | 12.8 (-9.2 to 39.8)                 |
| Democratic Republic of the Congo              | 11.8 (9.8 to 14.1)         | 11.3 (9.3 to 13.8)         | 11.4 (9.3 to 13.8)         | 11.9 (9.4 to 15.0)         | 0.3 (-0.5 to 1.2)                              | 5.1 (-6.7 to 19.0)                  |
| Equatorial Guinea                             | 12.4 (9.4 to 15.8)         | 9.0 (6.0 to 12.5)          | 9.2 (6.2 to 12.7)          | 9.2 (6.2 to 13.2)          | 0.2 (-0.9 to 1.2)                              | 2.6 (-12.1 to 19.4)                 |
| Gabon                                         | 13.6 (11.0 to 16.4)        | 12.4 (9.1 to 15.7)         | 12.3 (8.8 to 15.6)         | 12.9 (8.9 to 17.0)         | 0.2 (-0.7 to 1.1)                              | 3.7 (-10.2 to 18.1)                 |
| <b>Eastern Sub-Saharan Africa</b>             |                            |                            |                            |                            |                                                |                                     |
| Burundi                                       | 17.5 (14.1 to 21.7)        | 12.6 (9.8 to 15.8)         | 12.4 (9.7 to 15.6)         | 12.2 (9.1 to 16.2)         | -0.2 (-1.3 to 0.9)                             | -3.1 (-17.4 to 14.1)                |
| Comoros                                       | 8.7 (6.0 to 13.8)          | 8.2 (5.8 to 13.7)          | 8.2 (5.8 to 13.4)          | 8.2 (5.6 to 13.6)          | 0.0 (-0.6 to 0.7)                              | 0.7 (-8.2 to 11.5)                  |
| Djibouti                                      | 9.5 (5.9 to 16.1)          | 8.3 (5.2 to 13.9)          | 8.3 (5.2 to 13.8)          | 8.3 (5.0 to 14.1)          | 0.0 (-0.8 to 0.8)                              | 0.4 (-11.4 to 12.4)                 |
| Eritrea                                       | 19.6 (14.0 to 23.5)        | 15.9 (12.3 to 19.8)        | 15.4 (12.0 to 19.3)        | 16.8 (12.7 to 21.5)        | 0.3 (-0.6 to 1.1)                              | 5.0 (-8.4 to 18.7)                  |
| Ethiopia                                      | 15.1 (13.2 to 17.0)        | 9.7 (8.5 to 11.1)          | 9.4 (8.2 to 11.0)          | 9.2 (7.6 to 11.0)          | -0.4 (-1.1 to 0.5)                             | -5.2 (-15.7 to 8.3)                 |
| Kenya                                         | 13.1 (10.9 to 16.5)        | 11.1 (9.7 to 12.9)         | 10.8 (9.5 to 12.7)         | 11.6 (9.2 to 15.1)         | 0.3 (-0.7 to 1.6)                              | 4.7 (-10.5 to 26.7)                 |
| Madagascar                                    | 12.8 (10.5 to 15.5)        | 10.9 (8.6 to 13.6)         | 10.8 (8.5 to 13.4)         | 10.8 (8.5 to 13.4)         | -0.1 (-0.7 to 0.4)                             | -2.1 (-9.4 to 5.4)                  |
| Malawi                                        | 14.8 (12.4 to 17.1)        | 12.1 (10.2 to 14.1)        | 11.9 (9.9 to 14.1)         | 12.1 (9.2 to 15.9)         | -0.1 (-1.3 to 1.4)                             | -0.2 (-18.3 to 23.4)                |
| Mozambique                                    | 15.5 (13.2 to 18.0)        | 17.3 (13.9 to 20.8)        | 16.9 (13.4 to 20.3)        | 17.6 (13.2 to 22.2)        | 0.1 (-0.8 to 1.0)                              | 1.6 (-11.6 to 16.1)                 |
| Rwanda                                        | 19.8 (16.5 to 23.7)        | 11.0 (8.6 to 13.8)         | 10.7 (8.6 to 13.5)         | 10.4 (7.2 to 14.7)         | -0.4 (-2.2 to 1.5)                             | -5.3 (-27.9 to 26.1)                |
| Somalia                                       | 11.7 (7.7 to 18.7)         | 9.9 (6.5 to 15.6)          | 9.8 (6.4 to 15.5)          | 10.5 (6.9 to 16.7)         | 0.4 (-0.2 to 1.0)                              | 6.2 (-2.2 to 15.4)                  |
| South Sudan                                   | 13.0 (8.9 to 18.5)         | 11.8 (8.3 to 16.6)         | 11.8 (8.3 to 16.5)         | 12.1 (8.2 to 17.2)         | 0.1 (-0.7 to 1.1)                              | 2.4 (-9.9 to 18.1)                  |
| Tanzania                                      | 9.9 (8.5 to 11.5)          | 8.6 (7.2 to 10.3)          | 8.7 (7.1 to 10.5)          | 8.1 (6.6 to 10.0)          | -0.4 (-1.0 to 0.3)                             | -5.4 (-14.3 to 4.8)                 |
| Uganda                                        | 17.8 (15.0 to 21.6)        | 11.7 (10.1 to 13.8)        | 11.3 (9.3 to 13.4)         | 11.7 (10.3 to 14.0)        | -0.2 (-1.0 to 0.6)                             | -3.0 (-14.3 to 9.5)                 |
| Zambia                                        | 16.6 (14.1 to 19.2)        | 12.8 (10.8 to 14.7)        | 12.8 (10.6 to 14.9)        | 11.4 (7.9 to 15.3)         | -0.8 (-3.0 to 0.9)                             | -10.7 (-36.3 to 15.1)               |
| <b>Southern Sub-Saharan Africa</b>            |                            |                            |                            |                            |                                                |                                     |
| Botswana                                      | 12.8 (8.7 to 20.2)         | 10.1 (7.8 to 14.7)         | 9.8 (7.5 to 14.3)          | 10.6 (7.2 to 16.6)         | 0.3 (-1.3 to 2.3)                              | 4.9 (-17.3 to 41.6)                 |
| Lesotho                                       | 27.6 (22.6 to 34.4)        | 33.6 (25.5 to 41.4)        | 31.1 (23.9 to 38.5)        | 32.3 (21.5 to 46.7)        | -0.4 (-2.4 to 1.8)                             | -3.9 (-29.9 to 30.1)                |
| Namibia                                       | 20.7 (17.4 to 25.8)        | 11.7 (9.2 to 15.6)         | 11.6 (8.9 to 15.4)         | 12.2 (8.6 to 17.9)         | 0.2 (-1.3 to 1.8)                              | 3.6 (-17.7 to 30.4)                 |
| South Africa                                  | 23.8 (20.4 to 25.3)        | 10.6 (9.6 to 11.8)         | 10.9 (9.8 to 12.1)         | 12.8 (8.9 to 19.9)         | 1.2 (-1.0 to 4.1)                              | 21.0 (-13.4 to 85.5)                |
| Swaziland                                     | 25.4 (19.2 to 31.8)        | 24.2 (17.6 to 30.8)        | 21.9 (16.4 to 28.1)        | 22.9 (14.9 to 33.8)        | -0.5 (-2.4 to 1.8)                             | -5.4 (-30.1 to 30.1)                |
| Zimbabwe                                      | 29.4 (24.1 to 34.0)        | 26.7 (22.1 to 30.8)        | 25.9 (21.3 to 30.1)        | 28.8 (17.3 to 50.0)        | 0.3 (-2.7 to 4.0)                              | 8.0 (-33.5 to 81.9)                 |
| <b>Western Sub-Saharan Africa</b>             |                            |                            |                            |                            |                                                |                                     |
| Benin                                         | 12.0 (9.7 to 14.8)         | 11.2 (9.0 to 13.9)         | 10.9 (8.8 to 13.6)         | 10.6 (8.4 to 13.5)         | -0.4 (-1.0 to 0.3)                             | -5.3 (-13.8 to 4.3)                 |
| Burkina Faso                                  | 13.1 (11.2 to 15.3)        | 13.0 (11.0 to 15.3)        | 13.0 (10.9 to 15.2)        | 12.4 (10.2 to 15.0)        | -0.3 (-0.9 to 0.2)                             | -4.6 (-12.1 to 2.9)                 |
| Cameroon                                      | 16.0 (13.6 to 18.9)        | 14.2 (11.4 to 17.1)        | 13.8 (11.1 to 16.8)        | 12.8 (9.9 to 16.1)         | -0.7 (-1.4 to 0.1)                             | -9.8 (-18.8 to 2.2)                 |
| Cape Verde                                    | 15.4 (12.5 to 18.0)        | 16.6 (13.6 to 18.4)        | 16.4 (13.4 to 18.6)        | 15.2 (12.1 to 17.8)        | -0.6 (-1.4 to 0.1)                             | -8.1 (-18.8 to 1.6)                 |
| Chad                                          | 11.4 (8.4 to 16.0)         | 10.9 (8.1 to 15.5)         | 10.8 (8.0 to 15.5)         | 10.4 (7.5 to 15.0)         | -0.3 (-1.0 to 0.4)                             | -4.3 (-13.6 to 6.1)                 |
| Cote d'Ivoire                                 | 15.6 (13.4 to 18.1)        | 14.0 (11.5 to 16.8)        | 13.6 (11.1 to 16.4)        | 11.9 (9.6 to 14.4)         | -1.1 (-1.6 to -0.5)                            | -14.9 (-21.6 to -7.2)               |
| The Gambia                                    | 9.3 (7.0 to 13.9)          | 9.6 (7.0 to 14.1)          | 9.5 (6.9 to 14.0)          | 9.1 (6.4 to 13.6)          | -0.3 (-0.9 to 0.3)                             | -5.0 (-12.7 to 3.8)                 |
| Ghana                                         | 8.1 (6.9 to 9.6)           | 9.7 (7.8 to 11.2)          | 9.5 (7.7 to 11.2)          | 9.8 (7.4 to 12.0)          | 0.1 (-0.8 to 0.9)                              | 1.8 (-1.1 to 15.1)                  |
| Guinea                                        | 9.5 (6.9 to 14.6)          | 11.1 (8.1 to 15.5)         | 10.9 (7.9 to 15.1)         | 10.4 (7.3 to 15.1)         | -0.5 (-1.3 to 0.4)                             | -6.4 (-17.9 to 6.7)                 |
| Guinea-Bissau                                 | 14.4 (11.4 to 17.4)        | 13.6 (10.8 to 16.6)        | 13.3 (10.6 to 16.4)        | 12.1 (9.5 to 15.0)         | -0.8 (-1.3 to -0.2)                            | -10.9 (-18.0 to -3.6)               |
| Liberia                                       | 11.9 (9.5 to 15.7)         | 13.1 (10.7 to 16.4)        | 13.0 (10.6 to 16.3)        | 11.9 (9.3 to 15.5)         | -0.7 (-1.5 to 0.2)                             | -9.2 (-19.7 to 3.1)                 |
| Mali                                          | 6.9 (4.7 to 12.8)          | 6.6 (4.2 to 13.3)          | 6.7 (4.2 to 13.2)          | 6.2 (3.8 to 12.5)          | -0.5 (-1.1 to 0.1)                             | -7.2 (-15.0 to 0.8)                 |
| Mauritania                                    | 7.1 (5.2 to 11.9)          | 6.5 (4.4 to 11.0)          | 6.5 (4.4 to 10.9)          | 6.4 (4.2 to 11.2)          | -0.2 (-1.0 to 0.8)                             | -2.5 (-14.1 to 13.2)                |
| Niger                                         | 8.2 (5.6 to 14.8)          | 7.5 (5.1 to 13.8)          | 7.5 (5.1 to 13.6)          | 7.1 (4.7 to 13.1)          | -0.4 (-0.9 to 0.2)                             | -5.1 (-12.6 to 2.5)                 |

|                                                                                                                                              | Estimate in 2000 (95% UIs) | Estimate in 2015 (95% UIs) | Estimate in 2017 (95% UIs) | Estimate in 2020 (95% UIs) | Annualised rate of change, 2015-2020 (95% UIs) | Percent change, 2015-2020 (95% UIs) |
|----------------------------------------------------------------------------------------------------------------------------------------------|----------------------------|----------------------------|----------------------------|----------------------------|------------------------------------------------|-------------------------------------|
| Nigeria                                                                                                                                      | 8.9 (6.1 to 12.7)          | 7.4 (5.3 to 10.6)          | 7.4 (5.3 to 10.5)          | 6.9 (5.0 to 9.7)           | -0.9 (-1.0 to 0.2)                             | -6.5 (-14.3 to 2.4)                 |
| Sao Tome and Principe                                                                                                                        | 3.0 (2.5 to 3.5)           | 3.5 (2.6 to 4.4)           | 3.5 (2.5 to 4.4)           | 3.3 (2.3 to 4.3)           | -0.4 (-1.5 to 0.8)                             | -5.2 (-20.0 to 2.3)                 |
| Senegal                                                                                                                                      | 12.6 (10.9 to 14.7)        | 12.7 (10.5 to 15.4)        | 12.7 (10.5 to 15.4)        | 12.2 (9.8 to 15.0)         | -0.3 (-0.9 to 0.3)                             | -4.7 (-12.6 to 5.2)                 |
| Sierra Leone                                                                                                                                 | 9.2 (7.0 to 12.6)          | 9.8 (7.2 to 14.0)          | 9.7 (7.1 to 13.8)          | 8.8 (6.2 to 12.9)          | -0.8 (-1.6 to 0.0)                             | -10.7 (-20.8 to 0.3)                |
| Togo                                                                                                                                         | 12.9 (10.5 to 15.6)        | 12.2 (9.9 to 14.7)         | 12.0 (9.8 to 14.6)         | 11.5 (8.9 to 14.4)         | -0.4 (-1.3 to 0.6)                             | -5.7 (-17.4 to 8.7)                 |
| <b>Indicator 3.5.2: Risk-weighted prevalence of alcohol consumption, as measured by the summary exposure value (SEV) for alcohol use (%)</b> |                            |                            |                            |                            |                                                |                                     |
| <b>Central Europe, Eastern Europe, and Central Asia</b>                                                                                      |                            |                            |                            |                            |                                                |                                     |
| <b>Central Asia</b>                                                                                                                          |                            |                            |                            |                            |                                                |                                     |
| Armenia                                                                                                                                      | 9.8 (5.6 to 16.1)          | 11.4 (6.3 to 18.0)         | 11.8 (6.5 to 18.9)         | 14.0 (7.7 to 22.0)         | 1.4 (0.9 to 1.9)                               | 22.9 (14.8 to 32.3)                 |
| Azerbaijan                                                                                                                                   | 13.7 (8.7 to 19.1)         | 15.1 (8.9 to 21.8)         | 15.0 (8.4 to 22.4)         | 15.4 (8.7 to 23.1)         | 0.1 (-0.6 to 0.9)                              | 1.7 (-8.6 to 14.0)                  |
| Georgia                                                                                                                                      | 11.7 (7.1 to 17.9)         | 17.2 (10.3 to 25.4)        | 17.2 (10.4 to 26.7)        | 17.2 (11.4 to 28.6)        | 0.7 (0.3 to 1.3)                               | 11.9 (4.2 to 21.3)                  |
| Kazakhstan                                                                                                                                   | 19.9 (12.7 to 28.3)        | 21.9 (13.2 to 31.3)        | 22.1 (13.0 to 32.4)        | 22.1 (12.8 to 32.3)        | 0.0 (-0.5 to 0.6)                              | 0.5 (-7.5 to 8.8)                   |
| Kyrgyzstan                                                                                                                                   | 15.2 (10.0 to 20.8)        | 15.3 (9.7 to 21.4)         | 15.3 (9.2 to 21.7)         | 14.1 (8.4 to 20.4)         | -0.6 (-1.2 to -0.1)                            | -7.9 (-16.0 to -0.9)                |
| Mongolia                                                                                                                                     | 10.1 (5.9 to 16.2)         | 14.2 (8.3 to 22.2)         | 14.2 (8.2 to 22.3)         | 16.1 (9.5 to 25.0)         | 0.9 (0.4 to 1.4)                               | 13.9 (6.0 to 22.6)                  |
| Tajikistan                                                                                                                                   | 7.0 (3.8 to 12.4)          | 5.9 (2.9 to 10.9)          | 5.9 (2.8 to 10.9)          | 5.1 (2.4 to 9.5)           | -1.0 (-1.5 to -0.6)                            | -14.2 (-20.0 to -8.7)               |
| Turkmenistan                                                                                                                                 | 12.3 (7.3 to 19.2)         | 13.0 (7.3 to 21.0)         | 13.4 (7.3 to 22.1)         | 13.3 (7.2 to 22.1)         | 0.1 (-0.4 to 0.9)                              | 1.7 (-5.9 to 14.7)                  |
| Uzbekistan                                                                                                                                   | 10.6 (6.2 to 16.8)         | 12.6 (7.4 to 19.6)         | 12.7 (7.3 to 20.3)         | 15.0 (8.8 to 23.6)         | 1.2 (0.7 to 1.7)                               | 19.5 (11.2 to 28.7)                 |
| <b>Central Europe</b>                                                                                                                        |                            |                            |                            |                            |                                                |                                     |
| Albania                                                                                                                                      | 10.1 (6.3 to 15.1)         | 14.4 (9.0 to 20.4)         | 14.8 (8.8 to 21.3)         | 15.8 (9.5 to 23.2)         | 0.6 (-0.1 to 1.4)                              | 9.5 (-1.1 to 23.5)                  |
| Bosnia and Herzegovina                                                                                                                       | 19.0 (15.8 to 22.7)        | 20.6 (16.2 to 25.3)        | 20.9 (16.2 to 26.0)        | 20.4 (15.8 to 25.3)        | -0.1 (-0.3 to 0.2)                             | -1.0 (-4.5 to 2.9)                  |
| Bulgaria                                                                                                                                     | 18.7 (11.8 to 27.0)        | 21.6 (13.2 to 31.3)        | 22.4 (13.4 to 33.2)        | 24.2 (14.4 to 35.9)        | 0.7 (0.0 to 1.2)                               | 11.8 (0.2 to 18.9)                  |
| Croatia                                                                                                                                      | 23.4 (16.2 to 31.1)        | 20.3 (12.1 to 29.8)        | 20.8 (12.2 to 31.1)        | 19.3 (11.1 to 29.2)        | -0.4 (-0.9 to 0.1)                             | -5.4 (-12.6 to 1.5)                 |
| Czech Republic                                                                                                                               | 26.3 (18.3 to 35.3)        | 26.6 (17.9 to 37.4)        | 26.7 (17.3 to 38.0)        | 24.8 (15.8 to 35.8)        | -0.5 (-1.0 to 0.1)                             | -7.0 (-14.2 to 1.6)                 |
| Hungary                                                                                                                                      | 27.7 (20.5 to 35.9)        | 25.3 (16.9 to 35.8)        | 25.7 (16.6 to 36.8)        | 23.4 (14.9 to 34.3)        | -0.6 (-1.0 to -0.1)                            | -8.1 (-14.0 to -2.1)                |
| Macedonia                                                                                                                                    | 10.1 (5.8 to 17.0)         | 8.1 (3.9 to 14.2)          | 8.5 (4.0 to 15.0)          | 8.1 (3.9 to 14.5)          | 0.0 (-0.8 to 0.7)                              | 0.8 (-11.2 to 10.5)                 |
| Montenegro                                                                                                                                   | 23.2 (14.3 to 32.9)        | 24.4 (15.4 to 34.1)        | 24.9 (15.5 to 35.4)        | 27.1 (17.2 to 38.3)        | 0.7 (0.4 to 1.1)                               | 11.3 (5.5 to 18.1)                  |
| Poland                                                                                                                                       | 18.8 (12.0 to 27.6)        | 22.5 (14.2 to 33.2)        | 23.4 (14.6 to 34.6)        | 24.6 (15.2 to 36.7)        | 0.6 (0.2 to 1.0)                               | 9.4 (2.9 to 16.5)                   |
| Romania                                                                                                                                      | 28.4 (22.1 to 35.0)        | 30.7 (22.8 to 38.8)        | 31.1 (22.7 to 40.4)        | 31.0 (22.0 to 40.6)        | 0.1 (-0.3 to 0.4)                              | 0.9 (-4.8 to 5.9)                   |
| Serbia                                                                                                                                       | 18.2 (11.2 to 27.0)        | 25.9 (17.2 to 35.9)        | 26.6 (17.2 to 37.9)        | 29.2 (19.0 to 40.6)        | 0.8 (0.4 to 1.3)                               | 12.6 (5.9 to 21.1)                  |
| Slovakia                                                                                                                                     | 24.9 (17.5 to 33.6)        | 23.5 (15.0 to 33.4)        | 24.1 (14.9 to 34.9)        | 25.1 (14.4 to 34.2)        | -0.1 (-0.6 to 0.3)                             | -1.9 (-9.2 to 5.2)                  |
| Slovenia                                                                                                                                     | 12.7 (6.6 to 21.7)         | 10.0 (3.0 to 19.3)         | 10.7 (2.5 to 21.2)         | 9.6 (2.3 to 19.4)          | -0.6 (-2.7 to 1.1)                             | -5.2 (-35.2 to 17.7)                |
| <b>Eastern Europe</b>                                                                                                                        |                            |                            |                            |                            |                                                |                                     |
| Belarus                                                                                                                                      | 27.3 (19.4 to 35.4)        | 32.7 (23.3 to 42.7)        | 33.5 (23.2 to 44.8)        | 35.1 (24.5 to 46.8)        | 0.5 (0.1 to 0.8)                               | 7.3 (1.2 to 13.3)                   |
| Estonia                                                                                                                                      | 19.1 (12.7 to 28.1)        | 29.5 (19.9 to 39.7)        | 30.5 (19.6 to 41.9)        | 32.5 (20.6 to 44.5)        | 0.6 (0.0 to 1.3)                               | 9.7 (0.4 to 20.9)                   |
| Latvia                                                                                                                                       | 20.0 (13.0 to 28.7)        | 26.7 (17.8 to 36.7)        | 27.4 (17.5 to 37.8)        | 28.6 (18.3 to 39.4)        | 0.4 (-0.1 to 1.0)                              | 6.7 (-1.1 to 15.6)                  |
| Lithuania                                                                                                                                    | 22.1 (15.0 to 30.1)        | 31.4 (22.4 to 40.7)        | 32.3 (22.6 to 42.4)        | 34.6 (24.3 to 45.8)        | 0.6 (0.2 to 1.1)                               | 10.0 (3.0 to 17.6)                  |
| Moldova                                                                                                                                      | 29.1 (19.3 to 38.8)        | 23.5 (13.3 to 34.5)        | 24.2 (13.2 to 36.0)        | 23.7 (12.9 to 35.8)        | -0.0 (-0.6 to 0.6)                             | 0.8 (-9.1 to 9.6)                   |
| Russia                                                                                                                                       | 19.5 (13.0 to 27.4)        | 24.5 (16.6 to 33.9)        | 24.9 (16.1 to 35.2)        | 25.9 (16.5 to 36.7)        | 0.3 (-0.2 to 1.1)                              | 5.5 (-3.6 to 17.4)                  |
| Ukraine                                                                                                                                      | 27.6 (18.7 to 37.2)        | 36.2 (25.5 to 47.7)        | 36.5 (25.1 to 49.2)        | 36.8 (25.1 to 49.6)        | 0.1 (-0.4 to 0.7)                              | 1.6 (-6.1 to 10.3)                  |
| <b>High-income</b>                                                                                                                           |                            |                            |                            |                            |                                                |                                     |
| <b>Australasia</b>                                                                                                                           |                            |                            |                            |                            |                                                |                                     |
| Australia                                                                                                                                    | 22.1 (14.8 to 31.5)        | 24.4 (15.7 to 34.6)        | 24.5 (15.4 to 35.1)        | 25.4 (16.1 to 36.6)        | 0.3 (-0.2 to 0.7)                              | 4.1 (-3.1 to 10.8)                  |
| New Zealand                                                                                                                                  | 21.0 (14.7 to 28.5)        | 23.3 (15.0 to 31.6)        | 23.1 (14.4 to 31.8)        | 23.3 (14.5 to 32.6)        | -0.0 (-0.5 to 0.4)                             | -0.2 (-7.5 to 5.7)                  |
| <b>High-income Asia Pacific</b>                                                                                                              |                            |                            |                            |                            |                                                |                                     |
| Brunei                                                                                                                                       | 2.3 (0.6 to 6.1)           | 2.9 (0.9 to 7.0)           | 3.0 (0.9 to 7.1)           | 3.4 (1.0 to 8.0)           | 1.0 (-0.2 to 1.7)                              | 15.8 (-2.7 to 28.5)                 |
| Japan                                                                                                                                        | 15.0 (8.9 to 24.3)         | 16.3 (9.2 to 26.5)         | 17.2 (9.7 to 28.5)         | 17.6 (9.7 to 28.5)         | 0.5 (0.0 to 0.9)                               | 7.4 (0.1 to 14.0)                   |
| South Korea                                                                                                                                  | 16.4 (10.0 to 25.7)        | 18.0 (10.3 to 28.2)        | 19.4 (10.7 to 30.4)        | 18.4 (9.9 to 29.1)         | 0.1 (-0.5 to 0.8)                              | 1.6 (-6.6 to 12.1)                  |
| Singapore                                                                                                                                    | 10.1 (5.4 to 17.8)         | 11.3 (5.7 to 20.1)         | 11.7 (5.9 to 20.9)         | 11.4 (5.7 to 20.4)         | 0.1 (-0.3 to 0.6)                              | 1.2 (-4.8 to 10.2)                  |
| <b>High-income North America</b>                                                                                                             |                            |                            |                            |                            |                                                |                                     |
| Canada                                                                                                                                       | 18.9 (11.5 to 28.4)        | 20.9 (12.9 to 31.0)        | 21.5 (13.0 to 32.1)        | 22.2 (13.2 to 32.9)        | 0.4 (-0.0 to 0.9)                              | 6.4 (-0.6 to 14.6)                  |
| Greenland                                                                                                                                    | 13.4 (6.3 to 23.3)         | 14.4 (7.4 to 24.2)         | 14.7 (7.5 to 24.8)         | 15.8 (8.1 to 26.4)         | 0.6 (0.2 to 1.0)                               | 9.6 (2.3 to 16.8)                   |
| United States                                                                                                                                | 18.5 (12.4 to 26.4)        | 21.1 (13.6 to 30.3)        | 21.4 (13.5 to 31.7)        | 21.8 (13.7 to 31.9)        | 0.2 (-0.2 to 0.6)                              | 3.2 (-2.8 to 9.6)                   |
| <b>Southern Latin America</b>                                                                                                                |                            |                            |                            |                            |                                                |                                     |
| Argentina                                                                                                                                    | 21.1 (13.8 to 30.4)        | 19.9 (11.9 to 30.6)        | 20.5 (11.8 to 32.0)        | 20.0 (11.4 to 31.7)        | 0.0 (-0.6 to 0.5)                              | 0.3 (-9.0 to 7.5)                   |
| Chile                                                                                                                                        | 16.1 (9.7 to 24.9)         | 20.2 (12.7 to 30.6)        | 20.8 (12.7 to 32.0)        | 22.0 (13.2 to 33.4)        | 0.5 (0.1 to 1.0)                               | 8.4 (1.4 to 15.6)                   |
| Uruguay                                                                                                                                      | 19.1 (12.7 to 26.4)        | 17.4 (10.6 to 26.1)        | 17.9 (10.6 to 27.5)        | 17.1 (9.9 to 26.6)         | -0.2 (-0.6 to 0.3)                             | -2.2 (-9.2 to 4.7)                  |
| <b>Western Europe</b>                                                                                                                        |                            |                            |                            |                            |                                                |                                     |
| Andorra                                                                                                                                      | 36.2 (6.6 to 46.7)         | 24.8 (15.7 to 36.0)        | 25.3 (15.4 to 37.4)        | 22.6 (13.4 to 34.4)        | -0.7 (-1.1 to -0.2)                            | -9.3 (-15.7 to -2.6)                |
| Austria                                                                                                                                      | 28.0 (18.9 to 38.8)        | 27.4 (17.6 to 39.2)        | 27.7 (17.4 to 40.2)        | 26.2 (16.3 to 38.6)        | -0.3 (-0.8 to 0.1)                             | -4.3 (-11.1 to 1.9)                 |
| Belgium                                                                                                                                      | 17.9 (10.8 to 27.8)        | 24.2 (15.1 to 35.7)        | 24.5 (14.9 to 36.9)        | 25.1 (15.1 to 37.9)        | 0.2 (-0.2 to 0.8)                              | 3.9 (-3.6 to 11.9)                  |
| Cyprus                                                                                                                                       | 19.5 (12.8 to 27.5)        | 19.8 (12.4 to 29.3)        | 20.3 (12.4 to 30.9)        | 19.6 (11.8 to 30.0)        | -0.1 (-0.5 to 0.3)                             | -1.4 (-7.8 to 5.4)                  |
| Denmark                                                                                                                                      | 28.0 (18.2 to 39.6)        | 25.0 (15.2 to 37.6)        | 24.9 (14.4 to 38.1)        | 22.1 (12.4 to 35.2)        | -0.8 (-1.5 to -0.1)                            | -11.8 (-20.0 to -1.8)               |
| Finland                                                                                                                                      | 24.5 (16.3 to 33.7)        | 25.8 (16.1 to 37.3)        | 26.0 (15.9 to 38.0)        | 24.5 (14.8 to 36.4)        | -0.4 (-0.9 to 0.2)                             | -5.2 (-13.0 to 3.7)                 |
| France                                                                                                                                       | 31.4 (21.6 to 42.3)        | 26.8 (17.0 to 38.3)        | 26.5 (16.0 to 38.6)        | 23.8 (14.1 to 35.3)        | -0.8 (-1.4 to -0.3)                            | -11.6 (-19.1 to -5.1)               |
| Germany                                                                                                                                      | 26.6 (17.4 to 37.4)        | 25.8 (16.1 to 37.7)        | 26.1 (15.8 to 39.5)        | 23.6 (14.0 to 36.3)        | -0.6 (-1.1 to -0.2)                            | -8.6 (-15.1 to -2.4)                |
| Greece                                                                                                                                       | 23.6 (15.5 to 33.0)        | 24.5 (15.1 to 35.7)        | 24.8 (14.8 to 37.3)        | 23.1 (13.4 to 35.3)        | -0.4 (-0.9 to 0.0)                             | -6.2 (-12.9 to 0.7)                 |
| Iceland                                                                                                                                      | 13.2 (7.5 to 22.4)         | 17.6 (10.2 to 28.2)        | 18.1 (10.3 to 28.9)        | 20.5 (11.8 to 32.5)        | 1.0 (0.6 to 1.5)                               | 17.0 (10.0 to 25.3)                 |
| Ireland                                                                                                                                      | 29.9 (22.2 to 38.0)        | 27.8 (18.3 to 38.1)        | 28.3 (17.6 to 40.3)        | 26.0 (15.9 to 37.7)        | -0.5 (-1.2 to 0.4)                             | -6.9 (-16.1 to 6.4)                 |
| Israel                                                                                                                                       | 6.0 (3.3 to 10.9)          | 7.3 (4.0 to 12.2)          | 7.5 (4.1 to 12.4)          | 8.8 (4.9 to 14.6)          | 1.2 (0.8 to 1.7)                               | 20.5 (13.3 to 28.9)                 |
| Italy                                                                                                                                        | 26.6 (18.4 to 36.2)        | 21.3 (13.0 to 31.4)        | 21.8 (12.9 to 32.7)        | 19.1 (10.9 to 29.5)        | -0.8 (-1.3 to -0.3)                            | -10.8 (-17.6 to -3.7)               |
| Luxembourg                                                                                                                                   | 26.2 (17.4 to 35.3)        | 35.6 (24.8 to 46.4)        | 35.6 (23.5 to 46.6)        | 34.0 (22.2 to 45.9)        | -0.3 (-1.1 to 0.4)                             | -4.8 (-14.7 to 6.4)                 |
| Malta                                                                                                                                        | 12.4 (7.2 to 20.8)         | 15.8 (9.0 to 25.7)         | 16.5 (9.1 to 27.5)         | 18.4 (10.5 to 29.8)        | 1.0 (0.6 to 1.5)                               | 16.4 (8.7 to 24.4)                  |
| Netherlands                                                                                                                                  | 18.2 (11.6 to 27.8)        | 19.4 (11.7 to 29.4)        | 20.2 (12.0 to 31.0)        | 20.1 (12.0 to 30.9)        | 0.2 (-0.2 to 0.7)                              | 3.7 (-3.3 to 11.0)                  |
| Norway                                                                                                                                       | 16.5 (10.1 to 26.2)        | 18.9 (11.4 to 29.0)        | 19.1 (11.2 to 29.7)        | 19.5 (11.4 to 30.1)        | 0.2 (-0.3 to 0.8)                              | 3.1 (-4.1 to 12.5)                  |
| Portugal                                                                                                                                     | 30.9 (25.4 to 36.5)        | 29.3 (21.0 to 37.5)        | 29.9 (20.5 to 39.4)        | 27.8 (18.7 to 37.3)        | -0.4 (-0.8 to 0.0)                             | -5.4 (-11.5 to 0.7)                 |
| Spain                                                                                                                                        | 29.6 (21.3 to 37.6)        | 29.5 (20.0 to 40.5)        | 29.8 (19.6 to 41.5)        | 27.7 (17.8 to 39.3)        | -0.4 (-1.0 to 0.0)                             | -6.4 (-13.5 to 0.3)                 |
| Sweden                                                                                                                                       | 21.9 (13.7 to 32.7)        | 21.4 (13.0 to 33.4)        | 21.8 (12.7 to 34.1)        | 22.2 (13.1 to 34.7)        | 0.2 (-0.2 to 0.6)                              | 3.7 (-2.7 to 10.2)                  |
| Switzerland                                                                                                                                  | 22.1 (13.9 to 33.5)        | 21.9 (12.9 to 33.5)        | 22.4 (13.0 to 34.4)        | 21.1 (12.0 to 33.1)        | -0.3 (-0.8 to 0.1)                             | -4.2 (-11.6 to 2.1)                 |
| United Kingdom                                                                                                                               | 21.3 (14.5 to 29.7)        | 21.5 (13.9 to 31.0)        | 22.0 (14.1 to 32.4)        | 23.3 (14.9 to 33.8)        | 0.5 (0.2 to 0.9)                               | 8.4 (2.6 to 14.1)                   |
| <b>Latin America and Caribbean</b>                                                                                                           |                            |                            |                            |                            |                                                |                                     |



|                                               | Estimate in 2000 (95% UIs) | Estimate in 2015 (95% UIs) | Estimate in 2017 (95% UIs) | Estimate in 2020 (95% UIs) | Annualised rate of change, 2015-2020 (95% UIs) | Percent change, 2015-2020 (95% UIs) |
|-----------------------------------------------|----------------------------|----------------------------|----------------------------|----------------------------|------------------------------------------------|-------------------------------------|
| <b>Andean Latin America</b>                   |                            |                            |                            |                            |                                                |                                     |
| Bolivia                                       | 8.7 (4.8 to 14.5)          | 9.3 (5.0 to 15.7)          | 9.4 (4.9 to 15.9)          | 10.7 (5.7 to 18.3)         | 0.9 (0.2 to 1.4)                               | 15.3 (3.3 to 23.8)                  |
| Ecuador                                       | 14.5 (11.5 to 17.7)        | 15.1 (11.5 to 18.8)        | 15.1 (11.2 to 18.9)        | 14.7 (10.8 to 18.6)        | -0.2 (-0.5 to 0.2)                             | -2.9 (-7.5 to 3.8)                  |
| Peru                                          | 18.3 (11.6 to 27.1)        | 16.8 (10.1 to 25.7)        | 17.0 (9.9 to 26.3)         | 17.0 (9.9 to 26.3)         | -0.5 (-1.0 to -0.0)                            | -6.9 (-13.5 to -0.1)                |
| <b>Caribbean</b>                              |                            |                            |                            |                            |                                                |                                     |
| Antigua and Barbuda                           | 7.0 (3.5 to 12.4)          | 9.4 (4.8 to 15.8)          | 9.4 (4.5 to 16.1)          | 10.7 (5.2 to 18.0)         | 0.8 (-0.0 to 1.7)                              | 12.6 (-0.5 to 28.3)                 |
| The Bahamas                                   | 14.4 (8.8 to 21.6)         | 13.1 (7.0 to 20.9)         | 13.4 (6.5 to 21.4)         | 11.3 (5.4 to 18.4)         | -1.1 (-1.8 to -0.4)                            | -14.8 (-23.8 to -5.7)               |
| Barbados                                      | 12.9 (8.4 to 19.0)         | 15.2 (9.4 to 22.1)         | 15.5 (9.4 to 22.9)         | 16.5 (10.0 to 24.2)        | 0.5 (0.0 to 1.0)                               | 7.9 (0.3 to 16.9)                   |
| Belize                                        | 12.8 (8.2 to 18.1)         | 18.9 (12.5 to 25.0)        | 19.0 (11.8 to 25.5)        | 19.4 (12.2 to 26.3)        | 0.1 (-0.5 to 0.7)                              | 2.3 (-7.0 to 11.2)                  |
| Bermuda                                       | 28.9 (23.8 to 33.8)        | 25.6 (19.5 to 32.0)        | 25.3 (18.4 to 32.3)        | 25.2 (16.7 to 30.0)        | -0.7 (-1.1 to -0.3)                            | -9.3 (-15.4 to -4.8)                |
| Cuba                                          | 10.5 (6.3 to 16.4)         | 13.5 (8.3 to 20.6)         | 14.2 (8.5 to 21.6)         | 16.1 (9.7 to 24.4)         | 1.2 (0.7 to 1.7)                               | 19.5 (11.1 to 28.8)                 |
| Dominica                                      | 16.0 (10.6 to 22.2)        | 16.5 (10.2 to 23.4)        | 16.8 (9.8 to 24.6)         | 16.7 (9.6 to 24.4)         | 0.0 (-0.6 to 0.6)                              | 0.7 (-8.2 to 9.5)                   |
| Dominican Republic                            | 12.4 (7.5 to 19.4)         | 13.3 (7.6 to 21.2)         | 13.6 (7.5 to 22.2)         | 14.8 (8.3 to 23.9)         | 0.7 (0.3 to 1.1)                               | 10.8 (4.1 to 18.5)                  |
| Grenada                                       | 16.1 (11.1 to 21.9)        | 16.1 (10.1 to 23.2)        | 16.5 (9.9 to 24.1)         | 15.3 (9.2 to 22.6)         | -0.3 (-0.9 to 0.2)                             | -5.0 (-13.1 to 3.7)                 |
| Guyana                                        | 17.4 (12.5 to 22.4)        | 13.2 (8.2 to 18.8)         | 13.4 (8.1 to 19.6)         | 13.1 (7.7 to 19.2)         | -0.1 (-0.8 to 0.5)                             | -1.3 (-11.3 to 8.4)                 |
| Haiti                                         | 10.8 (7.0 to 15.9)         | 12.0 (7.4 to 17.6)         | 12.1 (7.2 to 18.3)         | 13.0 (7.8 to 19.4)         | 0.5 (0.1 to 1.0)                               | 8.3 (0.9 to 16.4)                   |
| Jamaica                                       | 10.1 (6.0 to 15.7)         | 13.2 (7.7 to 19.6)         | 13.4 (7.6 to 20.6)         | 14.7 (8.4 to 22.4)         | 0.7 (0.1 to 1.3)                               | 11.2 (2.2 to 21.0)                  |
| Puerto Rico                                   | 14.0 (7.3 to 22.4)         | 17.9 (10.2 to 26.7)        | 18.7 (10.7 to 28.3)        | 20.3 (11.7 to 30.3)        | 0.8 (0.4 to 1.3)                               | 13.4 (6.2 to 21.3)                  |
| Saint Lucia                                   | 19.7 (13.9 to 25.6)        | 16.7 (10.4 to 24.3)        | 16.9 (10.3 to 25.4)        | 15.3 (9.1 to 23.2)         | -0.6 (-1.2 to -0.1)                            | -8.7 (-16.3 to -0.7)                |
| Saint Vincent and the Grenadines              | 10.6 (6.6 to 16.6)         | 13.6 (8.0 to 20.7)         | 13.9 (7.9 to 21.6)         | 14.8 (8.6 to 23.0)         | 0.6 (0.1 to 1.1)                               | 9.0 (1.6 to 18.2)                   |
| Suriname                                      | 13.3 (8.6 to 19.6)         | 18.2 (11.6 to 25.3)        | 18.3 (11.2 to 25.8)        | 19.5 (12.1 to 28.2)        | 0.5 (-0.1 to 1.1)                              | 7.3 (-1.9 to 17.4)                  |
| Trinidad and Tobago                           | 7.7 (4.4 to 12.8)          | 9.8 (5.5 to 15.5)          | 10.0 (5.5 to 16.0)         | 11.5 (6.4 to 18.1)         | 1.1 (0.3 to 1.6)                               | 17.8 (5.4 to 26.5)                  |
| Virgin Islands, U.S.                          | 7.0 (0.2 to 15.7)          | 8.1 (1.3 to 17.0)          | 8.8 (0.3 to 19.1)          | 9.4 (0.3 to 20.5)          | -2.6 (-15.4 to 3.4)                            | 12.7 (-90.1 to 66.6)                |
| <b>Central Latin America</b>                  |                            |                            |                            |                            |                                                |                                     |
| Colombia                                      | 15.1 (9.7 to 22.0)         | 15.6 (9.4 to 23.2)         | 16.0 (9.3 to 24.0)         | 16.6 (9.8 to 25.0)         | 0.4 (-0.1 to 0.9)                              | 6.3 (-2.1 to 14.1)                  |
| Costa Rica                                    | 15.3 (9.8 to 22.1)         | 14.3 (8.3 to 22.6)         | 14.5 (8.3 to 22.6)         | 14.6 (8.5 to 22.6)         | 0.1 (-0.5 to 0.6)                              | 2.0 (-7.1 to 9.9)                   |
| El Salvador                                   | 9.8 (6.1 to 14.8)          | 11.6 (7.1 to 17.2)         | 11.9 (7.0 to 18.0)         | 13.2 (7.8 to 19.8)         | 0.8 (0.3 to 1.4)                               | 13.6 (5.1 to 23.3)                  |
| Guatemala                                     | 10.0 (7.3 to 12.5)         | 10.2 (7.0 to 13.1)         | 10.3 (6.9 to 13.4)         | 10.1 (6.8 to 13.2)         | -0.1 (-0.4 to 0.2)                             | -1.0 (-6.4 to 3.7)                  |
| Honduras                                      | 8.0 (5.8 to 10.0)          | 8.5 (6.4 to 10.8)          | 8.6 (6.2 to 11.0)          | 8.9 (6.4 to 11.5)          | 0.3 (-0.1 to 0.8)                              | 4.9 (-1.9 to 13.1)                  |
| Mexico                                        | 15.4 (11.7 to 19.1)        | 15.3 (9.4 to 18.0)         | 15.4 (9.1 to 18.4)         | 12.9 (8.7 to 18.0)         | -0.2 (-0.7 to 0.2)                             | -3.2 (-9.4 to 2.8)                  |
| Nicaragua                                     | 10.6 (6.8 to 15.1)         | 10.3 (6.4 to 15.3)         | 10.5 (6.2 to 15.9)         | 10.3 (6.1 to 15.7)         | -0.0 (-0.4 to 0.4)                             | -0.5 (-7.3 to 6.3)                  |
| Panama                                        | 12.4 (8.8 to 16.3)         | 14.8 (10.6 to 19.4)        | 15.3 (10.6 to 20.4)        | 16.5 (11.5 to 21.8)        | 0.7 (0.3 to 1.1)                               | 11.3 (5.3 to 17.7)                  |
| Venezuela                                     | 16.1 (12.3 to 19.9)        | 16.4 (11.8 to 21.3)        | 16.4 (11.0 to 21.7)        | 15.9 (10.7 to 21.2)        | -0.2 (-0.7 to 0.1)                             | -3.4 (-10.0 to 2.0)                 |
| <b>Tropical Latin America</b>                 |                            |                            |                            |                            |                                                |                                     |
| Brazil                                        | 15.7 (10.5 to 21.9)        | 16.3 (10.6 to 22.9)        | 17.1 (10.7 to 24.3)        | 17.4 (11.1 to 24.9)        | 0.4 (0.0 to 0.9)                               | 6.8 (0.5 to 14.6)                   |
| Paraguay                                      | 21.1 (14.3 to 28.3)        | 17.1 (10.8 to 25.6)        | 17.8 (10.8 to 26.6)        | 18.1 (10.9 to 27.1)        | 0.4 (-0.3 to 0.9)                              | 5.6 (-4.6 to 15.2)                  |
| <b>North Africa and Middle East</b>           |                            |                            |                            |                            |                                                |                                     |
| <b>North Africa and Middle East</b>           |                            |                            |                            |                            |                                                |                                     |
| Afghanistan                                   | 0.4 (0.2 to 0.8)           | 1.4 (0.8 to 2.4)           | 1.4 (0.8 to 2.4)           | 1.7 (1.0 to 2.9)           | 1.3 (0.7 to 2.0)                               | 21.9 (11.1 to 35.4)                 |
| Algeria                                       | 1.9 (1.1 to 2.9)           | 2.1 (1.2 to 3.1)           | 2.1 (1.2 to 3.2)           | 2.0 (1.1 to 3.1)           | -0.4 (-1.1 to 0.5)                             | -5.3 (-14.6 to 8.3)                 |
| Bahrain                                       | 5.0 (3.9 to 6.2)           | 3.4 (2.2 to 4.9)           | 3.4 (2.2 to 5.0)           | 2.9 (1.7 to 4.3)           | -1.0 (-1.8 to -0.5)                            | -14.3 (-23.9 to -6.6)               |
| Egypt                                         | 1.4 (1.1 to 1.7)           | 1.4 (1.0 to 1.9)           | 1.4 (1.0 to 1.9)           | 1.3 (0.9 to 1.7)           | -0.6 (-1.0 to -0.1)                            | -7.9 (-14.0 to -1.2)                |
| Iran                                          | 0.2 (0.1 to 0.4)           | 0.0 (0.0 to 0.0)           | 0.0 (0.0 to 0.0)           | 0.0 (0.0 to 0.0)           | -7.1 (-103.6 to 2.5)                           | -6.7 (-100.0 to 85.4)               |
| Iraq                                          | 2.5 (1.5 to 3.6)           | 2.0 (1.1 to 3.1)           | 2.1 (1.1 to 3.3)           | 2.2 (1.2 to 3.5)           | 0.5 (-0.6 to 1.1)                              | 8.3 (-8.6 to 18.6)                  |
| Jordan                                        | 1.1 (0.6 to 2.0)           | 1.4 (0.7 to 2.2)           | 1.4 (0.7 to 2.3)           | 1.3 (0.7 to 2.3)           | -0.1 (-0.7 to 0.8)                             | -0.9 (-9.9 to 12.2)                 |
| Kuwait                                        | 0.3 (0.1 to 0.6)           | 0.4 (0.2 to 0.8)           | 0.5 (0.2 to 0.8)           | 0.5 (0.2 to 1.0)           | 1.3 (0.4 to 1.8)                               | 20.9 (6.6 to 31.1)                  |
| Lebanon                                       | 5.6 (3.9 to 7.5)           | 5.7 (3.7 to 7.9)           | 5.8 (3.7 to 8.3)           | 6.1 (3.9 to 8.8)           | 0.5 (-0.4 to 1.0)                              | 7.8 (-5.8 to 16.0)                  |
| Libya                                         | 0.2 (0.1 to 0.3)           | 0.3 (0.1 to 0.6)           | 0.3 (0.1 to 0.7)           | 0.4 (0.1 to 1.5)           | 0.8 (0.1 to 1.5)                               | 12.6 (1.5 to 25.6)                  |
| Morocco                                       | 2.3 (1.8 to 2.8)           | 2.0 (1.6 to 2.5)           | 2.0 (1.5 to 2.5)           | 1.8 (1.4 to 2.3)           | -0.7 (-1.1 to -0.4)                            | -10.3 (-15.2 to -6.5)               |
| Palestine                                     | 0.3 (0.1 to 0.6)           | 0.3 (0.1 to 0.6)           | 0.3 (0.1 to 0.6)           | 0.2 (0.1 to 0.6)           | -1.7 (-3.3 to 0.8)                             | -12.5 (-38.6 to 13.3)               |
| Oman                                          | 1.6 (1.0 to 2.5)           | 2.0 (1.1 to 3.1)           | 1.9 (1.1 to 3.2)           | 2.0 (1.1 to 3.3)           | -0.0 (-0.8 to 0.7)                             | -0.3 (-11.1 to 11.5)                |
| Qatar                                         | 3.0 (1.8 to 4.5)           | 5.8 (3.8 to 7.9)           | 5.8 (3.7 to 8.0)           | 6.0 (3.8 to 8.4)           | 0.2 (-0.4 to 0.8)                              | 3.8 (-5.3 to 12.9)                  |
| Saudi Arabia                                  | 1.0 (0.5 to 1.8)           | 1.2 (0.6 to 2.2)           | 1.4 (0.7 to 2.4)           | 1.5 (0.7 to 2.6)           | 1.1 (0.2 to 1.6)                               | 18.0 (3.7 to 27.9)                  |
| Sudan                                         | 4.8 (3.9 to 5.8)           | 4.5 (3.5 to 5.6)           | 4.5 (3.4 to 5.5)           | 4.4 (3.3 to 5.5)           | -0.2 (-0.5 to 0.1)                             | -3.0 (-7.8 to 2.2)                  |
| Syria                                         | 1.6 (1.0 to 2.1)           | 1.5 (0.9 to 2.2)           | 1.4 (0.8 to 2.1)           | 1.2 (0.7 to 1.9)           | -1.3 (-2.1 to -0.3)                            | -18.1 (-27.2 to -4.3)               |
| Tunisia                                       | 1.9 (1.2 to 2.9)           | 2.1 (1.3 to 3.2)           | 2.1 (1.2 to 3.5)           | 2.3 (1.3 to 3.5)           | 0.5 (-0.0 to 1.0)                              | 7.9 (-0.1 to 16.5)                  |
| Turkey                                        | 7.4 (5.7 to 9.2)           | 4.9 (3.2 to 7.0)           | 4.9 (3.0 to 7.1)           | 4.1 (2.5 to 6.0)           | -1.2 (-1.8 to -0.4)                            | -16.9 (-23.3 to -5.3)               |
| United Arab Emirates                          | 11.2 (8.8 to 13.7)         | 12.8 (9.4 to 16.7)         | 12.6 (9.2 to 16.7)         | 11.9 (8.7 to 15.9)         | -0.5 (-0.8 to -0.1)                            | -6.5 (-11.1 to -1.5)                |
| Yemen                                         | 0.9 (0.5 to 1.7)           | 0.5 (0.2 to 0.9)           | 0.5 (0.2 to 1.0)           | 0.5 (0.2 to 1.0)           | 0.3 (-0.7 to 0.8)                              | 4.0 (-10.6 to 13.4)                 |
| <b>South Asia</b>                             |                            |                            |                            |                            |                                                |                                     |
| <b>South Asia</b>                             |                            |                            |                            |                            |                                                |                                     |
| Bangladesh                                    | 0.3 (0.1 to 0.5)           | 0.3 (0.2 to 0.6)           | 0.3 (0.2 to 0.6)           | 0.4 (0.2 to 0.6)           | 0.7 (0.1 to 1.4)                               | 10.7 (1.8 to 23.5)                  |
| Bhutan                                        | 5.0 (3.8 to 6.4)           | 3.4 (2.0 to 4.7)           | 3.4 (1.9 to 4.8)           | 2.9 (1.6 to 4.1)           | -1.1 (-1.6 to -0.7)                            | -15.4 (-21.5 to -10.2)              |
| India                                         | 6.8 (5.3 to 8.5)           | 8.2 (6.4 to 10.1)          | 8.5 (6.5 to 10.5)          | 9.6 (7.4 to 12.0)          | 1.0 (0.8 to 1.4)                               | 17.1 (12.3 to 22.9)                 |
| Nepal                                         | 2.7 (1.8 to 4.0)           | 3.8 (2.4 to 5.3)           | 3.8 (2.4 to 5.4)           | 4.1 (2.5 to 6.0)           | 0.6 (-0.1 to 1.6)                              | 9.4 (-2.1 to 27.0)                  |
| Pakistan                                      | 0.2 (0.1 to 0.5)           | 0.0 (0.0 to 0.1)           | 0.0 (0.0 to 0.1)           | 0.0 (0.0 to 0.1)           | -1.6 (-3.1 to 0.5)                             | -5.7 (-37.6 to 7.9)                 |
| <b>Southeast Asia, East Asia, and Oceania</b> |                            |                            |                            |                            |                                                |                                     |
| <b>East Asia</b>                              |                            |                            |                            |                            |                                                |                                     |
| China                                         | 9.2 (6.5 to 12.1)          | 12.1 (8.3 to 15.8)         | 12.5 (8.3 to 16.6)         | 13.9 (9.3 to 18.4)         | 0.9 (0.6 to 1.2)                               | 15.1 (8.8 to 20.5)                  |
| North Korea                                   | 8.0 (5.2 to 11.4)          | 7.1 (4.2 to 11.4)          | 7.2 (4.3 to 11.2)          | 7.2 (4.3 to 11.2)          | 0.1 (-0.6 to 0.7)                              | 1.3 (-8.1 to 10.8)                  |
| Taiwan (Province of China)                    | 9.7 (5.4 to 14.4)          | 12.4 (7.0 to 18.4)         | 13.1 (7.4 to 19.7)         | 14.4 (8.3 to 21.4)         | 1.0 (0.6 to 1.5)                               | 16.9 (9.1 to 25.9)                  |
| <b>Oceania</b>                                |                            |                            |                            |                            |                                                |                                     |
| American Samoa                                | 4.5 (2.2 to 8.3)           | 5.0 (2.5 to 8.7)           | 5.1 (2.6 to 8.8)           | 5.6 (2.8 to 9.7)           | 0.7 (0.2 to 1.2)                               | 11.3 (3.8 to 19.3)                  |
| Federated States of Micronesia                | 4.9 (2.7 to 8.4)           | 4.1 (2.1 to 7.5)           | 4.2 (2.0 to 7.7)           | 3.7 (1.8 to 6.9)           | -0.7 (-1.2 to -0.3)                            | -10.0 (-16.7 to -3.7)               |
| Fiji                                          | 6.0 (3.5 to 9.2)           | 7.5 (4.4 to 11.3)          | 7.6 (4.3 to 11.3)          | 8.4 (4.8 to 12.7)          | 0.7 (0.1 to 1.4)                               | 11.9 (1.7 to 22.8)                  |
| Guam                                          | 2.6 (0.2 to 6.6)           | 3.1 (0.6 to 7.3)           | 3.2 (0.4 to 7.6)           | 3.3 (0.4 to 7.8)           | -1.3 (-2.3 to 1.9)                             | 3.7 (-29.2 to 32.2)                 |
| Kiribati                                      | 4.6 (2.6 to 8.0)           | 4.7 (2.4 to 8.0)           | 4.7 (2.4 to 8.2)           | 4.9 (2.5 to 8.5)           | 0.3 (-0.1 to 0.7)                              | 4.6 (-2.2 to 11.6)                  |
| Marshall Islands                              | 4.2 (1.9 to 7.7)           | 4.5 (2.2 to 8.4)           | 4.6 (2.1 to 8.5)           | 5.2 (2.5 to 8.8)           | 1.0 (0.5 to 1.5)                               | 17.0 (7.9 to 25.9)                  |
| Northern Mariana Islands                      | 3.6 (0.7 to 7.6)           | 4.1 (0.9 to 8.9)           | 4.2 (0.7 to 9.2)           | 4.8 (0.8 to 10.3)          | -0.3 (-1.4 to 2.4)                             | 15.5 (-19.4 to 42.9)                |
| Papua New Guinea                              | 14.8 (9.0 to 20.6)         | 12.8 (7.0 to 19.0)         | 12.9 (7.1 to 19.3)         | 12.3 (6.7 to 18.7)         | -0.3 (-0.9 to 0.3)                             | -4.0 (-12.1 to 4.0)                 |

|                                                                                                   | Estimate in 2000 (95% UIs) | Estimate in 2015 (95% UIs) | Estimate in 2017 (95% UIs) | Estimate in 2020 (95% UIs) | Annualised rate of change, 2015-2020 (95% UIs) | Percent change, 2015-2020 (95% UIs) |
|---------------------------------------------------------------------------------------------------|----------------------------|----------------------------|----------------------------|----------------------------|------------------------------------------------|-------------------------------------|
| Samoa                                                                                             | 6.7 (4.0 to 10.8)          | 7.3 (4.2 to 11.8)          | 7.4 (4.1 to 11.9)          | 7.5 (4.1 to 12.3)          | 0.2 (-0.4 to 0.7)                              | 2.8 (-5.3 to 11.5)                  |
| Solomon Islands                                                                                   | 2.7 (1.3 to 5.4)           | 4.1 (2.0 to 7.3)           | 4.1 (2.0 to 7.4)           | 5.0 (2.4 to 8.9)           | 1.3 (0.8 to 1.9)                               | 23.0 (13.2 to 32.1)                 |
| Tonga                                                                                             | 3.8 (1.8 to 7.1)           | 4.0 (1.8 to 7.5)           | 4.1 (1.8 to 7.7)           | 4.2 (1.8 to 8.1)           | 0.4 (-0.4 to 1.5)                              | 6.2 (-5.3 to 25.6)                  |
| Vanuatu                                                                                           | 4.1 (2.1 to 7.2)           | 2.6 (1.1 to 5.2)           | 2.6 (1.0 to 5.3)           | 2.3 (0.9 to 4.6)           | -1.0 (-1.8 to -0.4)                            | -14.0 (-23.4 to -6.2)               |
| <b>Southeast Asia</b>                                                                             |                            |                            |                            |                            |                                                |                                     |
| Cambodia                                                                                          | 13.4 (9.7 to 16.6)         | 17.0 (13.5 to 20.6)        | 17.1 (13.5 to 20.9)        | 17.0 (13.3 to 21.3)        | 0.0 (-0.4 to 0.8)                              | 0.1 (-5.5 to 13.2)                  |
| Indonesia                                                                                         | 1.0 (0.5 to 1.7)           | 1.1 (0.6 to 1.9)           | 1.2 (0.6 to 2.0)           | 1.3 (0.7 to 2.1)           | 0.8 (0.4 to 1.2)                               | 13.2 (5.5 to 20.4)                  |
| Laos                                                                                              | 9.8 (6.0 to 15.2)          | 9.7 (5.7 to 15.6)          | 9.9 (5.8 to 16.0)          | 10.4 (6.2 to 17.0)         | 0.5 (-0.0 to 1.0)                              | 7.4 (-0.6 to 15.6)                  |
| Malaysia                                                                                          | 4.8 (3.0 to 6.5)           | 5.4 (3.4 to 7.5)           | 5.6 (3.3 to 7.7)           | 5.7 (3.5 to 8.1)           | 0.3 (-0.3 to 0.9)                              | 5.4 (-5.1 to 14.4)                  |
| Maldives                                                                                          | 4.1 (2.3 to 6.8)           | 4.1 (2.1 to 7.1)           | 4.2 (2.0 to 7.5)           | 3.7 (1.8 to 6.8)           | -0.8 (-1.7 to 0.7)                             | -10.6 (-22.8 to 10.7)               |
| Mauritius                                                                                         | 11.1 (7.0 to 16.4)         | 10.9 (6.4 to 17.3)         | 11.4 (6.5 to 18.2)         | 10.8 (6.1 to 17.4)         | -0.1 (-0.6 to 0.3)                             | -1.8 (-8.3 to 5.4)                  |
| Myanmar                                                                                           | 3.1 (1.6 to 5.0)           | 4.1 (2.0 to 6.8)           | 4.3 (2.1 to 7.3)           | 5.1 (2.5 to 8.7)           | 1.5 (0.9 to 2.2)                               | 24.5 (14.4 to 38.5)                 |
| Philippines                                                                                       | 10.5 (6.5 to 16.4)         | 10.0 (5.8 to 16.0)         | 10.2 (5.9 to 16.3)         | 9.4 (5.4 to 15.4)          | -0.4 (-0.9 to 0.1)                             | -8.3 (-13.1 to 1.6)                 |
| Sri Lanka                                                                                         | 4.2 (2.2 to 7.2)           | 9.9 (5.9 to 14.9)          | 10.5 (6.1 to 16.2)         | 12.0 (7.3 to 18.2)         | 1.3 (0.6 to 2.0)                               | 21.3 (10.0 to 34.4)                 |
| Seychelles                                                                                        | 12.4 (8.9 to 16.2)         | 11.3 (7.1 to 16.1)         | 11.4 (6.8 to 16.6)         | 10.1 (5.9 to 15.0)         | -0.8 (-1.5 to 0.1)                             | -11.5 (-20.2 to 2.2)                |
| Thailand                                                                                          | 12.3 (8.6 to 16.3)         | 14.2 (9.6 to 19.0)         | 14.7 (9.6 to 19.9)         | 14.7 (9.6 to 20.2)         | 0.2 (-0.3 to 0.7)                              | 3.2 (-3.8 to 11.4)                  |
| Timor-Leste                                                                                       | 0.9 (0.4 to 1.9)           | 0.4 (0.1 to 0.9)           | 0.4 (0.1 to 0.9)           | 0.2 (-0.7 to 1.1)          | 0.2 (-0.7 to 1.1)                              | 3.8 (-9.7 to 18.5)                  |
| Vietnam                                                                                           | 10.2 (6.0 to 15.4)         | 21.3 (15.6 to 26.9)        | 21.4 (15.3 to 27.1)        | 22.5 (15.9 to 28.9)        | 0.4 (-0.2 to 1.1)                              | 5.7 (-2.6 to 18.6)                  |
| <b>Sub-Saharan Africa</b>                                                                         |                            |                            |                            |                            |                                                |                                     |
| <b>Central Sub-Saharan Africa</b>                                                                 |                            |                            |                            |                            |                                                |                                     |
| Angola                                                                                            | 5.2 (2.8 to 9.2)           | 10.5 (6.4 to 15.7)         | 10.6 (6.2 to 16.2)         | 12.2 (7.1 to 18.5)         | 0.9 (0.2 to 1.7)                               | 15.4 (3.2 to 29.6)                  |
| Central African Republic                                                                          | 11.2 (6.7 to 16.8)         | 10.8 (6.1 to 16.6)         | 10.7 (5.8 to 17.0)         | 10.0 (5.5 to 15.9)         | -0.5 (-1.1 to -0.0)                            | -7.3 (-14.6 to -0.3)                |
| Congo                                                                                             | 9.8 (5.8 to 15.1)          | 11.0 (6.7 to 16.6)         | 11.3 (6.7 to 17.4)         | 12.6 (7.5 to 19.2)         | 0.9 (0.3 to 1.5)                               | 14.9 (4.9 to 24.3)                  |
| Democratic Republic of the Congo                                                                  | 6.3 (3.4 to 10.6)          | 7.5 (4.1 to 12.3)          | 7.6 (4.0 to 12.6)          | 8.7 (4.6 to 14.3)          | 1.0 (0.5 to 1.6)                               | 16.9 (8.4 to 26.8)                  |
| Equatorial Guinea                                                                                 | 10.1 (6.4 to 14.8)         | 18.7 (13.1 to 24.2)        | 18.9 (12.8 to 24.7)        | 18.9 (12.6 to 25.3)        | 0.0 (-0.7 to 0.9)                              | 0.9 (-10.1 to 14.4)                 |
| Gabon                                                                                             | 12.6 (8.3 to 17.6)         | 13.2 (8.5 to 18.4)         | 13.4 (8.3 to 19.2)         | 13.3 (8.3 to 19.2)         | 0.0 (-0.5 to 0.5)                              | 0.7 (-7.2 to 8.5)                   |
| <b>Eastern Sub-Saharan Africa</b>                                                                 |                            |                            |                            |                            |                                                |                                     |
| Burundi                                                                                           | 22.0 (17.9 to 26.3)        | 20.8 (16.0 to 25.7)        | 20.4 (15.3 to 25.4)        | 18.8 (13.9 to 23.5)        | -0.7 (-1.1 to -0.4)                            | -9.9 (-15.1 to -5.3)                |
| Comoros                                                                                           | 0.9 (0.4 to 1.8)           | 1.1 (0.5 to 2.2)           | 1.2 (0.5 to 2.3)           | 1.3 (0.6 to 2.5)           | 0.9 (0.3 to 1.5)                               | 14.2 (5.1 to 24.5)                  |
| Djibouti                                                                                          | 3.3 (1.6 to 6.2)           | 3.2 (1.4 to 6.2)           | 3.2 (1.4 to 6.3)           | 3.2 (1.5 to 6.5)           | 0.2 (-0.3 to 0.7)                              | 3.7 (-4.2 to 11.1)                  |
| Eritrea                                                                                           | 6.5 (3.6 to 10.7)          | 5.3 (2.6 to 9.2)           | 5.5 (2.6 to 9.5)           | 5.6 (2.7 to 9.8)           | 0.4 (-0.1 to 0.9)                              | 6.1 (-1.0 to 13.9)                  |
| Ethiopia                                                                                          | 6.4 (3.8 to 10.5)          | 7.0 (4.2 to 11.4)          | 7.1 (4.2 to 11.6)          | 7.4 (4.3 to 12.0)          | 0.3 (-0.1 to 0.9)                              | 5.2 (-1.8 to 14.3)                  |
| Kenya                                                                                             | 13.5 (9.6 to 17.1)         | 13.0 (8.8 to 17.1)         | 13.0 (8.7 to 17.2)         | 13.7 (9.2 to 18.1)         | 0.4 (0.0 to 0.7)                               | 5.6 (0.6 to 10.3)                   |
| Madagascar                                                                                        | 6.2 (3.4 to 10.3)          | 5.6 (2.9 to 9.9)           | 5.7 (2.9 to 10.1)          | 6.5 (3.3 to 11.1)          | 0.9 (-0.3 to 1.5)                              | 15.0 (-3.9 to 25.6)                 |
| Malawi                                                                                            | 5.7 (3.3 to 8.9)           | 6.4 (3.5 to 10.2)          | 6.4 (3.4 to 10.1)          | 6.5 (3.4 to 10.4)          | 0.0 (-0.7 to 0.7)                              | 0.6 (-9.5 to 11.5)                  |
| Mozambique                                                                                        | 6.5 (3.2 to 12.0)          | 7.8 (4.0 to 13.7)          | 7.9 (3.9 to 14.2)          | 8.5 (4.2 to 15.0)          | 0.6 (0.0 to 1.4)                               | 9.0 (4.0 to 23.0)                   |
| Rwanda                                                                                            | 19.6 (12.5 to 28.3)        | 16.1 (9.5 to 25.0)         | 15.8 (9.0 to 25.1)         | 14.2 (8.0 to 22.8)         | -0.9 (-1.4 to -0.4)                            | -12.3 (-18.8 to -5.8)               |
| Somalia                                                                                           | 1.7 (0.7 to 3.7)           | 2.0 (0.9 to 4.1)           | 2.0 (0.9 to 4.2)           | 2.2 (0.9 to 4.5)           | 0.6 (0.0 to 1.1)                               | 9.5 (0.5 to 18.3)                   |
| South Sudan                                                                                       | 1.9 (0.8 to 3.8)           | 1.9 (0.8 to 3.7)           | 1.9 (0.8 to 3.6)           | 1.7 (0.8 to 3.7)           | 0.2 (-0.3 to 0.7)                              | 3.4 (-4.7 to 11.2)                  |
| Tanzania                                                                                          | 15.7 (10.6 to 20.4)        | 11.3 (7.0 to 17.1)         | 10.7 (6.2 to 16.8)         | 9.2 (5.3 to 14.6)          | -1.4 (-2.1 to -0.9)                            | -19.2 (-26.9 to -12.2)              |
| Uganda                                                                                            | 16.4 (10.4 to 23.2)        | 12.4 (7.2 to 19.6)         | 11.7 (6.4 to 18.9)         | 9.9 (5.3 to 16.4)          | -1.5 (-2.2 to -0.8)                            | -20.5 (-28.2 to -11.6)              |
| Zambia                                                                                            | 10.1 (6.2 to 14.7)         | 8.6 (4.9 to 13.4)          | 8.6 (4.8 to 13.6)          | 8.3 (4.6 to 13.1)          | -0.3 (-0.8 to 0.2)                             | -4.2 (-10.9 to 3.1)                 |
| <b>Southern Sub-Saharan Africa</b>                                                                |                            |                            |                            |                            |                                                |                                     |
| Botswana                                                                                          | 14.5 (10.7 to 18.0)        | 16.4 (11.6 to 21.0)        | 16.2 (10.9 to 20.9)        | 14.9 (10.0 to 19.9)        | -0.7 (-1.4 to 0.2)                             | -9.8 (-18.6 to 3.8)                 |
| Lesotho                                                                                           | 19.1 (13.2 to 24.5)        | 20.1 (13.1 to 26.3)        | 20.0 (12.5 to 26.5)        | 18.8 (11.7 to 25.8)        | -0.4 (-1.0 to 0.1)                             | -6.3 (-13.7 to 2.1)                 |
| Namibia                                                                                           | 10.8 (6.5 to 17.1)         | 21.5 (13.9 to 28.2)        | 21.0 (12.9 to 28.4)        | 21.2 (13.0 to 29.2)        | -0.1 (-0.9 to 0.9)                             | -1.4 (-12.8 to 15.0)                |
| South Africa                                                                                      | 17.8 (14.5 to 21.2)        | 19.4 (15.7 to 23.5)        | 19.7 (15.7 to 24.3)        | 19.9 (15.8 to 24.6)        | 0.2 (-0.1 to 0.4)                              | 2.4 (-1.1 to 6.0)                   |
| Swaziland                                                                                         | 11.4 (9.2 to 13.8)         | 8.2 (5.4 to 11.1)          | 8.1 (5.0 to 11.3)          | 7.0 (4.3 to 9.8)           | -1.0 (-1.6 to -0.6)                            | -14.2 (-21.3 to -8.4)               |
| Zimbabwe                                                                                          | 8.8 (5.8 to 12.1)          | 8.9 (5.7 to 12.7)          | 9.1 (5.5 to 13.1)          | 9.0 (5.5 to 13.0)          | 0.0 (-0.4 to 0.5)                              | 0.5 (-6.0 to 8.3)                   |
| <b>Western Sub-Saharan Africa</b>                                                                 |                            |                            |                            |                            |                                                |                                     |
| Benin                                                                                             | 6.0 (3.1 to 10.3)          | 6.3 (3.2 to 11.0)          | 6.3 (3.2 to 11.2)          | 6.4 (3.1 to 11.5)          | 0.4 (-0.1 to 0.9)                              | 5.6 (-1.9 to 14.7)                  |
| Burkina Faso                                                                                      | 15.2 (9.6 to 20.7)         | 12.7 (7.3 to 18.6)         | 12.3 (6.8 to 18.7)         | 10.6 (5.7 to 16.5)         | -1.2 (-1.8 to -0.5)                            | -16.5 (-24.2 to -7.0)               |
| Cameroon                                                                                          | 12.4 (9.5 to 15.6)         | 13.8 (10.0 to 17.3)        | 13.5 (9.6 to 17.2)         | 12.4 (8.6 to 17.2)         | -0.7 (-1.3 to -0.0)                            | -9.9 (-17.7 to -0.0)                |
| Cape Verde                                                                                        | 11.0 (8.5 to 13.7)         | 11.9 (8.1 to 15.7)         | 11.8 (7.7 to 16.0)         | 10.8 (6.9 to 14.9)         | -0.7 (-1.4 to 0.2)                             | -9.6 (-18.4 to 2.8)                 |
| Chad                                                                                              | 6.0 (4.0 to 8.3)           | 6.8 (4.4 to 9.4)           | 6.7 (4.3 to 9.7)           | 6.7 (4.0 to 9.9)           | -0.1 (-0.9 to 0.9)                             | -1.9 (-13.1 to 14.3)                |
| Cote d'Ivoire                                                                                     | 10.5 (6.3 to 15.0)         | 8.2 (4.7 to 13.0)          | 7.9 (4.4 to 12.8)          | 6.8 (3.6 to 11.2)          | -1.3 (-2.0 to -0.3)                            | -17.7 (-26.3 to -4.9)               |
| The Gambia                                                                                        | 5.3 (3.3 to 8.1)           | 4.2 (2.4 to 6.9)           | 3.9 (2.1 to 6.7)           | 3.5 (1.8 to 6.2)           | -1.4 (-2.3 to -0.1)                            | -18.1 (-29.0 to -1.7)               |
| Ghana                                                                                             | 13.9 (8.5 to 18.9)         | 16.9 (11.3 to 22.2)        | 16.9 (11.0 to 22.4)        | 17.8 (11.5 to 23.8)        | 0.3 (-0.2 to 0.7)                              | 5.2 (-2.7 to 11.8)                  |
| Guinea                                                                                            | 1.5 (0.7 to 2.8)           | 1.5 (0.6 to 2.8)           | 1.5 (0.6 to 2.9)           | 1.5 (0.6 to 2.9)           | 0.2 (-0.3 to 0.6)                              | 2.6 (-4.8 to 9.5)                   |
| Guinea-Bissau                                                                                     | 8.2 (5.5 to 11.0)          | 7.8 (5.0 to 11.3)          | 7.7 (4.7 to 11.3)          | 7.1 (4.3 to 10.6)          | -0.6 (-1.2 to -0.1)                            | -9.0 (-16.1 to -2.2)                |
| Liberia                                                                                           | 12.6 (8.7 to 16.5)         | 10.3 (6.0 to 14.7)         | 10.5 (5.8 to 15.3)         | 9.9 (5.4 to 14.5)          | -0.3 (-1.1 to 0.4)                             | -4.3 (-14.7 to 5.5)                 |
| Mali                                                                                              | 2.7 (1.6 to 3.8)           | 2.6 (1.5 to 3.9)           | 2.6 (1.5 to 3.9)           | 2.5 (1.4 to 3.8)           | -0.3 (-0.7 to 0.2)                             | -3.9 (-10.6 to 3.2)                 |
| Mauritania                                                                                        | 0.7 (0.3 to 1.2)           | 0.8 (0.4 to 1.4)           | 0.8 (0.4 to 1.5)           | 0.8 (0.4 to 1.5)           | 0.3 (-0.6 to 0.8)                              | 4.1 (-8.5 to 13.2)                  |
| Niger                                                                                             | 1.8 (0.8 to 3.5)           | 2.0 (0.8 to 3.9)           | 2.0 (0.8 to 4.1)           | 2.0 (0.6 to 3.7)           | 0.0 (-0.6 to 0.7)                              | 0.3 (-8.3 to 11.7)                  |
| Nigeria                                                                                           | 18.7 (13.7 to 23.7)        | 10.9 (6.5 to 16.8)         | 10.4 (5.8 to 16.5)         | 8.8 (4.8 to 14.0)          | -1.5 (-2.2 to -0.7)                            | -20.0 (-27.9 to -9.6)               |
| Sao Tome and Principe                                                                             | 13.2 (10.6 to 16.0)        | 13.2 (10.5 to 15.9)        | 13.2 (10.2 to 16.2)        | 12.1 (9.2 to 15.2)         | -0.6 (-1.0 to 0.3)                             | -8.2 (-14.0 to 4.9)                 |
| Senegal                                                                                           | 1.3 (0.7 to 2.2)           | 1.2 (0.6 to 2.1)           | 1.2 (0.6 to 2.1)           | 1.1 (0.6 to 2.1)           | -0.2 (-0.9 to 0.4)                             | -2.1 (-12.6 to 5.8)                 |
| Sierra Leone                                                                                      | 13.7 (11.0 to 16.6)        | 12.1 (8.8 to 15.4)         | 11.7 (8.3 to 15.1)         | 10.2 (7.1 to 13.4)         | -1.2 (-1.7 to -0.2)                            | -15.7 (-22.8 to -2.9)               |
| Togo                                                                                              | 6.2 (3.7 to 9.4)           | 6.3 (3.6 to 9.6)           | 6.4 (3.6 to 9.9)           | 6.3 (3.6 to 9.9)           | 0.1 (-0.5 to 0.5)                              | 0.9 (-7.4 to 8.4)                   |
| <b>Indicator 3.6.1: Age-standardised death rate due to road injuries (per 100,000 population)</b> |                            |                            |                            |                            |                                                |                                     |
| <b>Central Europe, Eastern Europe, and Central Asia</b>                                           |                            |                            |                            |                            |                                                |                                     |
| <b>Central Asia</b>                                                                               |                            |                            |                            |                            |                                                |                                     |
| Armenia                                                                                           | 9.2 (8.9 to 9.6)           | 7.3 (7.0 to 7.7)           | 6.9 (6.5 to 7.3)           | 8.1 (6.3 to 10.9)          | 0.6 (-1.0 to 2.7)                              | 11.0 (-14.0 to 49.5)                |
| Azerbaijan                                                                                        | 7.8 (7.4 to 8.4)           | 6.2 (5.5 to 6.9)           | 6.1 (5.3 to 6.8)           | 6.0 (4.8 to 7.8)           | -0.2 (-1.6 to 1.2)                             | -2.6 (-20.9 to 18.8)                |
| Georgia                                                                                           | 7.9 (7.5 to 8.5)           | 18.0 (17.2 to 18.8)        | 17.1 (15.8 to 18.3)        | 12.6 (9.5 to 17.1)         | -2.4 (-4.2 to -0.4)                            | -29.7 (-46.8 to -6.4)               |
| Kazakhstan                                                                                        | 15.0 (14.4 to 15.5)        | 15.4 (14.7 to 16.3)        | 14.6 (13.5 to 15.8)        | 12.9 (9.4 to 17.6)         | -1.2 (-3.2 to 0.9)                             | -16.1 (-38.2 to 14.5)               |
| Kyrgyzstan                                                                                        | 14.7 (13.9 to 15.7)        | 16.4 (15.7 to 17.2)        | 14.4 (13.5 to 15.5)        | 13.2 (10.2 to 17.1)        | -1.5 (-3.3 to 0.3)                             | -19.8 (-38.6 to 4.0)                |
| Mongolia                                                                                          | 16.1 (14.6 to 18.1)        | 16.6 (15.1 to 18.5)        | 16.1 (14.2 to 18.3)        | 12.7 (10.2 to 15.4)        | -1.8 (-3.0 to -0.6)                            | -23.8 (-36.7 to -8.8)               |
| Tajikistan                                                                                        | 6.6 (6.1 to 7.2)           | 7.4 (6.7 to 8.2)           | 7.5 (6.7 to 8.3)           | 8.0 (6.2 to 9.9)           | 0.5 (-1.1 to 1.9)                              | 7.8 (-15.1 to 32.4)                 |
| Turkmenistan                                                                                      | 10.4 (10.0 to 10.9)        | 6.5 (6.0 to 6.9)           | 6.5 (5.7 to 7.1)           | 6.5 (5.0 to 8.9)           | -0.0 (-1.5 to 2.0)                             | 0.6 (-20.6 to 35.0)                 |

|                                    | Estimate in 2000 (95% UIs) | Estimate in 2015 (95% UIs) | Estimate in 2017 (95% UIs) | Estimate in 2020 (95% UIs) | Annualised rate of change, 2015-2020 (95% UIs) | Percent change, 2015-2020 (95% UIs) |
|------------------------------------|----------------------------|----------------------------|----------------------------|----------------------------|------------------------------------------------|-------------------------------------|
| Uzbekistan                         | 13.0 (12.5 to 13.7)        | 13.2 (12.1 to 14.4)        | 12.6 (11.0 to 14.2)        | 12.0 (9.5 to 14.8)         | -0.7 (-2.0 to 0.7)                             | -9.3 (-26.1 to 10.7)                |
| <b>Central Europe</b>              |                            |                            |                            |                            |                                                |                                     |
| Albania                            | 8.1 (7.5 to 8.9)           | 8.1 (6.7 to 9.7)           | 7.8 (6.3 to 9.5)           | 6.0 (4.3 to 8.2)           | -2.0 (-3.7 to -0.4)                            | -25.6 (-42.9 to -5.7)               |
| Bosnia and Herzegovina             | 5.2 (4.6 to 5.9)           | 6.5 (6.0 to 6.9)           | 6.3 (5.7 to 6.8)           | 4.9 (4.2 to 5.8)           | -1.9 (-2.9 to -0.8)                            | -24.4 (-34.9 to -11.5)              |
| Bulgaria                           | 12.0 (11.6 to 12.3)        | 8.6 (8.1 to 9.1)           | 8.5 (7.9 to 9.3)           | 5.5 (4.4 to 6.8)           | -3.0 (-4.4 to -1.6)                            | -35.7 (-48.4 to -21.8)              |
| Croatia                            | 13.7 (13.3 to 14.1)        | 7.8 (7.5 to 8.1)           | 7.2 (6.6 to 7.7)           | 4.7 (4.0 to 5.5)           | -3.5 (-4.5 to -2.3)                            | -40.5 (-49.4 to -29.7)              |
| Czech Republic                     | 13.3 (12.9 to 13.6)        | 6.7 (6.5 to 7.0)           | 6.5 (6.0 to 7.0)           | 4.7 (4.0 to 5.5)           | -2.4 (-3.5 to -1.4)                            | -30.3 (-40.5 to -18.6)              |
| Hungary                            | 13.1 (12.8 to 13.4)        | 6.9 (6.6 to 7.1)           | 6.2 (5.8 to 6.8)           | 4.7 (3.9 to 5.9)           | -2.6 (-3.9 to -0.9)                            | -32.1 (-44.4 to -13.1)              |
| Macedonia                          | 7.0 (6.6 to 7.4)           | 6.4 (6.0 to 6.8)           | 6.3 (5.7 to 6.9)           | 5.8 (4.8 to 7.0)           | -0.7 (-1.7 to 0.6)                             | -9.2 (-22.4 to 8.9)                 |
| Montenegro                         | 10.3 (9.7 to 11.0)         | 7.7 (7.1 to 8.3)           | 7.6 (6.8 to 8.4)           | 6.9 (5.7 to 8.2)           | -0.7 (-1.9 to 0.4)                             | -10.1 (-24.9 to 6.0)                |
| Poland                             | 17.4 (17.0 to 17.8)        | 8.8 (8.5 to 9.1)           | 8.5 (7.9 to 9.1)           | 3.4 (2.9 to 4.0)           | -4.3 (-7.3 to -5.2)                            | -61.0 (-66.5 to -54.6)              |
| Romania                            | 13.3 (12.9 to 13.7)        | 9.3 (9.0 to 9.6)           | 9.2 (8.6 to 9.8)           | 5.5 (4.4 to 6.8)           | -3.5 (-5.0 to -2.0)                            | -41.0 (-52.5 to -26.2)              |
| Serbia                             | 12.0 (11.5 to 12.6)        | 7.4 (7.0 to 7.7)           | 6.9 (6.4 to 7.4)           | 6.5 (5.2 to 8.7)           | -0.9 (-2.2 to 0.9)                             | -11.6 (-28.6 to 14.4)               |
| Slovakia                           | 14.7 (14.2 to 15.3)        | 7.3 (6.9 to 8.1)           | 6.8 (6.3 to 7.6)           | 5.4 (4.6 to 6.3)           | -2.1 (-3.1 to -1.0)                            | -26.3 (-37.3 to -14.1)              |
| Slovenia                           | 14.6 (14.2 to 15.1)        | 5.8 (5.5 to 6.1)           | 5.8 (5.3 to 6.4)           | 3.6 (2.8 to 4.7)           | -3.2 (-4.9 to -1.3)                            | -37.1 (-52.3 to -18.2)              |
| <b>Eastern Europe</b>              |                            |                            |                            |                            |                                                |                                     |
| Belarus                            | 19.4 (18.7 to 20.1)        | 9.1 (8.6 to 9.7)           | 8.6 (7.9 to 9.5)           | 5.1 (3.7 to 6.8)           | -3.9 (-6.0 to -1.9)                            | -43.7 (-59.2 to -24.6)              |
| Estonia                            | 17.2 (16.6 to 18.0)        | 5.9 (5.6 to 6.4)           | 5.7 (4.9 to 6.5)           | 3.9 (2.4 to 5.9)           | -3.0 (-6.1 to -0.1)                            | -34.6 (-59.8 to -1.2)               |
| Latvia                             | 24.1 (23.3 to 25.0)        | 9.1 (8.7 to 9.6)           | 9.0 (7.9 to 10.2)          | 6.4 (3.9 to 10.1)          | -2.6 (-5.6 to 0.6)                             | -30.1 (-56.9 to 9.8)                |
| Lithuania                          | 21.1 (20.4 to 21.8)        | 9.7 (9.2 to 10.1)          | 9.1 (8.4 to 9.9)           | 4.7 (3.4 to 6.3)           | -5.0 (-7.0 to -2.9)                            | -51.9 (-64.9 to -35.1)              |
| Moldova                            | 15.6 (15.1 to 16.2)        | 11.2 (10.8 to 11.7)        | 10.2 (9.6 to 10.8)         | 10.0 (6.9 to 14.3)         | 4.9 (-3.3 to 1.7)                              | -10.6 (-39.0 to 28.4)               |
| Russia                             | 26.2 (26.0 to 26.5)        | 16.0 (15.7 to 16.5)        | 14.8 (14.4 to 15.7)        | 9.0 (5.6 to 13.1)          | -4.0 (-6.9 to -1.4)                            | -44.1 (-64.7 to -18.8)              |
| Ukraine                            | 17.3 (16.8 to 17.9)        | 15.1 (12.6 to 16.1)        | 13.7 (12.0 to 14.9)        | 13.2 (8.1 to 20.3)         | -1.1 (-4.1 to 1.9)                             | -12.8 (-46.3 to 33.7)               |
| <b>High-income</b>                 |                            |                            |                            |                            |                                                |                                     |
| <b>Australasia</b>                 |                            |                            |                            |                            |                                                |                                     |
| Australia                          | 10.1 (9.8 to 10.4)         | 5.9 (5.7 to 6.1)           | 5.9 (5.3 to 6.6)           | 4.9 (4.0 to 6.1)           | -1.3 (-2.7 to 0.2)                             | -17.5 (-33.0 to 2.4)                |
| New Zealand                        | 13.2 (12.8 to 13.6)        | 7.3 (7.0 to 7.5)           | 7.5 (7.0 to 8.0)           | 6.0 (5.1 to 7.0)           | -1.3 (-2.4 to -0.2)                            | -17.4 (-30.3 to -3.5)               |
| <b>High-income Asia Pacific</b>    |                            |                            |                            |                            |                                                |                                     |
| Brunei                             | 21.9 (20.5 to 23.4)        | 16.0 (14.7 to 17.3)        | 16.1 (14.5 to 17.7)        | 15.1 (12.8 to 17.9)        | -0.4 (-1.3 to 0.6)                             | -5.5 (-17.9 to 9.8)                 |
| Japan                              | 7.8 (7.7 to 7.8)           | 3.7 (3.6 to 3.8)           | 3.7 (3.6 to 3.9)           | 3.3 (2.8 to 4.0)           | -0.8 (-2.0 to 0.3)                             | -11.4 (-25.7 to 4.9)                |
| South Korea                        | 24.5 (24.0 to 25.1)        | 9.4 (9.0 to 9.9)           | 9.1 (8.4 to 9.8)           | 5.8 (4.8 to 7.2)           | -3.2 (-4.5 to -1.9)                            | -38.1 (-49.3 to -24.3)              |
| Singapore                          | 5.9 (5.4 to 6.3)           | 3.2 (3.1 to 3.4)           | 3.0 (2.8 to 3.2)           | 2.9 (2.3 to 3.6)           | -0.7 (-2.3 to 0.6)                             | -9.1 (-28.9 to 10.2)                |
| <b>High-income North America</b>   |                            |                            |                            |                            |                                                |                                     |
| Canada                             | 10.0 (9.7 to 10.2)         | 6.7 (6.4 to 7.0)           | 6.6 (6.1 to 7.0)           | 6.4 (5.5 to 7.3)           | -0.4 (-1.3 to 0.5)                             | -5.0 (-17.7 to 7.7)                 |
| Greenland                          | 8.1 (7.3 to 9.0)           | 4.1 (3.7 to 4.6)           | 4.0 (3.6 to 4.5)           | 3.8 (2.8 to 4.5)           | -0.5 (-2.4 to 1.7)                             | -46.2 (-30.3 to 29.4)               |
| United States                      | 15.9 (15.8 to 16.1)        | 11.4 (11.2 to 11.6)        | 11.9 (11.4 to 12.4)        | 12.2 (9.7 to 15.3)         | 0.4 (-1.1 to 1.9)                              | 7.2 (-14.8 to 33.3)                 |
| <b>Southern Latin America</b>      |                            |                            |                            |                            |                                                |                                     |
| Argentina                          | 14.3 (13.9 to 14.7)        | 13.9 (13.4 to 14.4)        | 13.4 (11.9 to 15.1)        | 10.8 (8.9 to 13.0)         | -1.7 (-2.9 to -0.5)                            | -22.2 (-35.2 to -6.8)               |
| Chile                              | 14.9 (14.5 to 15.3)        | 11.3 (10.9 to 11.7)        | 11.0 (9.6 to 12.4)         | 8.2 (6.8 to 12.4)          | -2.1 (-3.4 to -0.9)                            | -26.9 (-39.7 to -12.6)              |
| Uruguay                            | 15.3 (14.8 to 15.8)        | 15.4 (14.8 to 16.1)        | 14.7 (12.9 to 16.5)        | 8.0 (6.3 to 10.2)          | -4.4 (-5.8 to -2.9)                            | -48.1 (-58.0 to -35.0)              |
| <b>Western Europe</b>              |                            |                            |                            |                            |                                                |                                     |
| Andorra                            | 6.3 (5.4 to 7.3)           | 4.2 (3.6 to 4.8)           | 4.1 (3.5 to 4.8)           | 4.0 (3.2 to 4.8)           | -0.2 (-1.1 to 0.7)                             | -3.2 (-15.5 to 10.8)                |
| Austria                            | 10.8 (10.4 to 11.1)        | 4.6 (4.4 to 4.8)           | 4.3 (4.0 to 4.7)           | 3.1 (2.5 to 3.9)           | -2.6 (-4.0 to -1.1)                            | -32.0 (-45.4 to -14.9)              |
| Belgium                            | 15.6 (15.2 to 16.0)        | 7.2 (6.9 to 7.4)           | 6.9 (6.4 to 7.4)           | 5.5 (4.4 to 6.8)           | -1.7 (-3.2 to -0.4)                            | -22.6 (-38.3 to -5.6)               |
| Cyprus                             | 23.5 (21.8 to 25.6)        | 10.1 (9.4 to 11.0)         | 10.0 (9.1 to 11.1)         | 7.0 (5.4 to 9.2)           | -2.5 (-4.0 to -0.7)                            | -30.7 (-44.9 to -10.1)              |
| Denmark                            | 9.3 (9.0 to 9.6)           | 3.7 (3.5 to 3.9)           | 3.9 (3.6 to 4.2)           | 3.2 (2.3 to 4.2)           | -1.1 (-2.9 to 0.8)                             | -13.8 (-35.2 to 13.4)               |
| Finland                            | 8.0 (7.8 to 8.3)           | 4.0 (3.8 to 4.2)           | 4.1 (3.8 to 4.4)           | 2.9 (2.2 to 3.6)           | -2.2 (-3.8 to -0.8)                            | -28.2 (-43.7 to -11.1)              |
| France                             | 13.3 (12.8 to 13.6)        | 5.6 (5.4 to 5.8)           | 5.3 (5.0 to 5.8)           | 4.6 (3.8 to 5.6)           | -1.4 (-2.7 to -0.0)                            | -18.4 (-32.8 to -0.7)               |
| Germany                            | 9.6 (9.4 to 9.8)           | 4.3 (4.2 to 4.5)           | 4.4 (4.0 to 4.9)           | 3.1 (2.4 to 3.8)           | -2.3 (-3.8 to -0.7)                            | -28.2 (-43.7 to -10.4)              |
| Greece                             | 16.6 (16.3 to 17.0)        | 9.8 (9.5 to 10.1)          | 9.7 (9.1 to 10.3)          | 4.8 (4.0 to 5.8)           | -4.7 (-6.0 to -3.5)                            | -50.7 (-59.5 to -41.2)              |
| Iceland                            | 7.0 (6.6 to 7.5)           | 3.5 (3.3 to 3.7)           | 3.5 (3.4 to 3.9)           | 2.8 (2.1 to 4.0)           | -1.5 (-3.3 to 0.8)                             | -18.9 (-38.7 to 13.5)               |
| Ireland                            | 10.4 (10.1 to 10.8)        | 3.5 (3.3 to 3.7)           | 3.4 (3.1 to 3.7)           | 2.5 (2.0 to 3.1)           | -2.3 (-3.6 to -0.7)                            | -28.3 (-41.4 to -10.6)              |
| Israel                             | 11.9 (11.5 to 12.2)        | 6.4 (6.2 to 6.7)           | 6.2 (5.8 to 6.6)           | 4.7 (3.9 to 5.8)           | -2.1 (-3.3 to -0.8)                            | -26.5 (-39.3 to -10.9)              |
| Italy                              | 13.8 (13.6 to 14.1)        | 6.3 (6.2 to 6.5)           | 6.0 (5.6 to 6.4)           | 4.2 (3.5 to 5.0)           | -2.8 (-3.9 to -1.7)                            | -33.6 (-43.9 to -22.1)              |
| Luxembourg                         | 11.8 (11.3 to 12.3)        | 5.4 (5.0 to 5.8)           | 5.3 (4.8 to 5.9)           | 3.6 (2.4 to 5.3)           | -2.8 (-5.2 to -0.3)                            | -33.7 (-53.9 to -4.8)               |
| Malta                              | 5.7 (5.4 to 6.0)           | 3.1 (2.9 to 3.4)           | 3.3 (3.1 to 3.6)           | 2.3 (1.7 to 3.0)           | -2.1 (-4.0 to -0.3)                            | -26.9 (-45.2 to -4.6)               |
| Netherlands                        | 8.0 (7.8 to 8.2)           | 3.6 (3.5 to 3.8)           | 3.7 (3.5 to 3.9)           | 3.0 (2.5 to 3.5)           | -1.4 (-2.5 to -0.2)                            | -18.9 (-31.7 to -2.4)               |
| Norway                             | 7.7 (7.5 to 7.9)           | 3.3 (3.2 to 3.4)           | 3.4 (3.2 to 3.5)           | 2.5 (2.1 to 3.1)           | -1.8 (-3.2 to -0.3)                            | -23.3 (-37.9 to -5.1)               |
| Portugal                           | 19.6 (19.1 to 20.1)        | 6.5 (6.2 to 6.8)           | 6.4 (5.9 to 6.9)           | 3.3 (2.6 to 4.3)           | -4.6 (-6.2 to -2.7)                            | -49.2 (-60.3 to -32.9)              |
| Spain                              | 13.9 (13.6 to 14.2)        | 4.2 (4.0 to 4.3)           | 4.1 (3.8 to 4.4)           | 2.5 (1.9 to 3.6)           | -3.4 (-5.3 to -0.9)                            | -39.3 (-55.1 to -12.9)              |
| Sweden                             | 6.2 (6.0 to 6.4)           | 3.2 (3.0 to 3.3)           | 3.0 (2.8 to 3.3)           | 2.7 (2.2 to 3.2)           | -1.2 (-2.4 to 0.0)                             | -15.5 (-29.8 to 0.7)                |
| Switzerland                        | 7.3 (7.0 to 7.5)           | 3.2 (3.0 to 3.3)           | 3.0 (2.8 to 3.3)           | 2.6 (1.9 to 3.4)           | -1.5 (-3.3 to 0.4)                             | -19.7 (-39.3 to 6.0)                |
| United Kingdom                     | 6.6 (6.5 to 6.7)           | 3.3 (3.3 to 3.4)           | 3.4 (3.3 to 3.5)           | 3.0 (2.4 to 3.6)           | -0.9 (-2.2 to 0.5)                             | -11.7 (-27.8 to 7.8)                |
| <b>Latin America and Caribbean</b> |                            |                            |                            |                            |                                                |                                     |
| <b>Andean Latin America</b>        |                            |                            |                            |                            |                                                |                                     |
| Bolivia                            | 31.2 (26.2 to 35.6)        | 21.2 (16.3 to 25.5)        | 20.4 (15.5 to 24.9)        | 19.4 (14.4 to 24.2)        | -0.6 (-1.3 to 0.1)                             | -8.6 (-17.6 to 1.9)                 |
| Ecuador                            | 25.7 (25.0 to 26.5)        | 28.2 (26.5 to 29.9)        | 26.7 (24.1 to 29.7)        | 23.5 (20.6 to 26.8)        | -1.2 (-2.1 to -0.3)                            | -16.6 (-27.0 to -4.6)               |
| Peru                               | 17.4 (16.1 to 18.7)        | 14.4 (12.9 to 16.0)        | 13.7 (11.8 to 16.0)        | 10.6 (8.2 to 13.3)         | -2.1 (-3.5 to -0.7)                            | -26.2 (-40.9 to -10.0)              |
| <b>Caribbean</b>                   |                            |                            |                            |                            |                                                |                                     |
| Antigua and Barbuda                | 9.4 (8.8 to 10.0)          | 6.9 (6.4 to 7.6)           | 6.9 (6.2 to 7.6)           | 6.7 (5.0 to 9.2)           | -0.3 (-2.0 to 1.9)                             | -3.6 (-26.4 to 33.8)                |
| The Bahamas                        | 19.6 (18.3 to 21.1)        | 15.1 (13.9 to 16.4)        | 14.8 (13.4 to 16.5)        | 14.4 (11.1 to 19.5)        | 0.4 (-1.9 to 1.7)                              | -4.6 (-24.4 to 28.3)                |
| Barbados                           | 12.0 (11.3 to 12.8)        | 8.8 (8.2 to 9.5)           | 8.7 (7.9 to 9.7)           | 6.7 (5.5 to 8.2)           | -1.8 (-2.9 to -0.7)                            | -23.9 (-35.5 to -9.5)               |
| Belize                             | 28.5 (27.1 to 29.9)        | 18.8 (17.6 to 20.0)        | 18.8 (17.3 to 20.2)        | 17.3 (13.3 to 22.9)        | 0.6 (-2.1 to 1.2)                              | -8.2 (-26.5 to 20.6)                |
| Bermuda                            | 12.4 (11.5 to 13.3)        | 7.9 (7.1 to 8.7)           | 7.8 (7.0 to 8.8)           | 6.7 (4.1 to 12.0)          | -1.4 (-4.2 to 2.7)                             | -15.2 (-46.7 to 50.6)               |
| Cuba                               | 14.0 (13.6 to 14.4)        | 8.0 (7.7 to 8.3)           | 7.9 (7.1 to 9.0)           | 9.2 (7.4 to 11.7)          | 0.9 (-0.5 to 2.6)                              | 16.0 (-6.7 to 47.5)                 |
| Dominica                           | 17.4 (16.4 to 18.4)        | 15.4 (14.2 to 16.6)        | 15.4 (14.0 to 16.9)        | 16.3 (12.8 to 21.2)        | 0.3 (-1.1 to 2.0)                              | 5.4 (-15.0 to 36.0)                 |
| Dominican Republic                 | 25.9 (23.6 to 28.3)        | 30.1 (26.9 to 33.8)        | 29.4 (24.7 to 34.2)        | 18.9 (14.9 to 23.4)        | -3.2 (-4.4 to -1.8)                            | -37.4 (-48.3 to -24.0)              |
| Grenada                            | 10.9 (10.2 to 11.7)        | 9.3 (8.7 to 10.0)          | 9.4 (8.6 to 10.2)          | 8.9 (7.5 to 10.6)          | -0.4 (-1.3 to 0.8)                             | -4.9 (-18.2 to 12.2)                |
| Guyana                             | 16.7 (15.9 to 17.5)        | 16.7 (15.2 to 18.5)        | 15.6 (13.4 to 18.1)        | 14.8 (11.3 to 19.4)        | -0.9 (-2.2 to 0.9)                             | -11.7 (-28.5 to 14.8)               |
| Haiti                              | 54.6 (38.4 to 74.3)        | 43.6 (28.9 to 59.9)        | 42.0 (27.7 to 57.6)        | 42.2 (27.3 to 59.2)        | -0.2 (-0.9 to 0.4)                             | -3.4 (-12.3 to 6.5)                 |

|                                               | Estimate in 2000 (95% UIs) | Estimate in 2015 (95% UIs) | Estimate in 2017 (95% UIs) | Estimate in 2030 (95% UIs) | Annualized rate of change, 2015-2030 (95% UIs) | Percent change, 2015-2030 (95% UIs) |
|-----------------------------------------------|----------------------------|----------------------------|----------------------------|----------------------------|------------------------------------------------|-------------------------------------|
| <b>Jamaica</b>                                | 5.7 (5.3 to 6.0)           | 9.8 (7.8 to 11.3)          | 9.1 (7.3 to 10.9)          | 7.6 (5.8 to 10.4)          | -1.7 (-3.0 to 0.1)                             | -21.9 (-36.7 to 1.2)                |
| <b>Puerto Rico</b>                            | 15.7 (15.2 to 16.3)        | 9.2 (8.8 to 9.7)           | 9.2 (8.8 to 9.7)           | 5.2 (4.2 to 6.0)           | -3.8 (-5.0 to -2.5)                            | -43.4 (-53.9 to -28.4)              |
| <b>Saint Lucia</b>                            | 16.8 (16.0 to 17.9)        | 12.5 (11.5 to 13.6)        | 12.6 (11.2 to 14.1)        | 10.5 (8.6 to 12.7)         | -1.2 (-2.3 to 0.0)                             | -16.5 (-29.4 to 0.2)                |
| <b>Saint Vincent and the Grenadines</b>       | 11.5 (10.8 to 12.2)        | 9.3 (8.6 to 10.1)          | 9.3 (8.6 to 10.2)          | 8.3 (6.8 to 10.2)          | -0.8 (-2.0 to 0.6)                             | -10.8 (-25.8 to 9.9)                |
| <b>Suriname</b>                               | 19.7 (18.4 to 21.2)        | 16.6 (15.0 to 18.4)        | 16.5 (14.4 to 18.6)        | 10.0 (8.3 to 12.0)         | -3.5 (-4.5 to -2.4)                            | -40.2 (-49.0 to -30.2)              |
| <b>Trinidad and Tobago</b>                    | 15.4 (14.8 to 16.1)        | 13.6 (11.4 to 16.2)        | 13.6 (11.4 to 16.4)        | 9.7 (7.4 to 12.8)          | -2.3 (-3.8 to -0.5)                            | -28.4 (-43.7 to -6.7)               |
| <b>Virgin Islands, U.S.</b>                   | 13.2 (12.4 to 14.0)        | 10.9 (9.7 to 12.2)         | 10.9 (9.6 to 12.4)         | 10.0 (8.2 to 12.0)         | -0.6 (-1.6 to 0.3)                             | -7.9 (-21.9 to 5.1)                 |
| <b>Central Latin America</b>                  |                            |                            |                            |                            |                                                |                                     |
| <b>Colombia</b>                               | 20.0 (19.4 to 20.6)        | 14.4 (13.7 to 15.0)        | 13.9 (12.3 to 15.7)        | 10.3 (8.1 to 12.9)         | -2.3 (-3.7 to -0.7)                            | -28.5 (-42.9 to -10.4)              |
| <b>Costa Rica</b>                             | 19.1 (18.6 to 19.8)        | 15.0 (14.1 to 15.8)        | 15.0 (13.8 to 16.9)        | 12.0 (10.3 to 13.9)        | -1.5 (-2.4 to -0.6)                            | -20.3 (-30.0 to -8.7)               |
| <b>El Salvador</b>                            | 33.9 (31.9 to 37.7)        | 21.4 (18.5 to 24.4)        | 21.0 (17.4 to 25.4)        | 18.8 (14.6 to 24.1)        | -0.9 (-2.0 to 0.3)                             | -12.3 (-26.1 to 4.0)                |
| <b>Guatemala</b>                              | 15.6 (15.0 to 16.3)        | 17.0 (16.2 to 18.0)        | 17.0 (14.8 to 19.4)        | 12.3 (10.0 to 15.4)        | -2.2 (-3.4 to -0.8)                            | -27.7 (-40.3 to -11.2)              |
| <b>Honduras</b>                               | 21.9 (17.5 to 26.2)        | 16.7 (12.6 to 20.3)        | 16.2 (12.1 to 19.8)        | 12.2 (8.9 to 15.5)         | -2.1 (-2.7 to -1.3)                            | -26.5 (-33.6 to -18.3)              |
| <b>Mexico</b>                                 | 19.6 (19.4 to 19.9)        | 15.4 (15.1 to 15.7)        | 15.7 (15.1 to 16.3)        | 11.7 (9.8 to 14.4)         | -1.9 (-3.0 to -0.5)                            | -24.1 (-36.2 to -7.2)               |
| <b>Nicaragua</b>                              | 16.4 (15.1 to 18.3)        | 11.5 (10.8 to 12.9)        | 10.8 (9.3 to 12.6)         | 9.9 (8.1 to 12.0)          | -1.0 (-2.1 to 0.2)                             | -14.1 (-27.5 to 2.6)                |
| <b>Panama</b>                                 | 18.6 (17.9 to 19.4)        | 13.3 (12.7 to 13.9)        | 12.7 (11.6 to 13.8)        | 11.4 (9.7 to 13.6)         | -1.0 (-2.1 to 0.1)                             | -14.1 (-26.6 to 2.0)                |
| <b>Venezuela</b>                              | 25.2 (24.5 to 25.8)        | 21.7 (20.1 to 23.5)        | 21.6 (18.2 to 25.8)        | 18.1 (13.5 to 24.4)        | -1.3 (-3.0 to 0.6)                             | -17.0 (-36.5 to 8.6)                |
| <b>Tropical Latin America</b>                 |                            |                            |                            |                            |                                                |                                     |
| <b>Brazil</b>                                 | 25.0 (24.4 to 25.5)        | 20.6 (20.2 to 21.0)        | 20.0 (19.1 to 20.7)        | 12.5 (10.6 to 14.9)        | -3.3 (-4.4 to -2.2)                            | -39.0 (-48.6 to -27.7)              |
| <b>Paraguay</b>                               | 18.2 (16.8 to 19.8)        | 22.9 (19.7 to 26.2)        | 21.9 (18.0 to 26.6)        | 18.4 (13.4 to 25.0)        | -1.5 (-3.3 to 0.3)                             | -19.5 (-39.3 to 4.2)                |
| <b>North Africa and Middle East</b>           |                            |                            |                            |                            |                                                |                                     |
| <b>Alghamistan</b>                            | 53.8 (39.0 to 66.5)        | 33.7 (27.1 to 41.3)        | 32.6 (26.3 to 40.0)        | 29.5 (23.5 to 36.5)        | -0.9 (-1.4 to -0.4)                            | -12.5 (-18.7 to -6.0)               |
| <b>Algeria</b>                                | 29.8 (24.2 to 45.3)        | 18.4 (14.6 to 30.2)        | 17.1 (13.5 to 27.9)        | 15.0 (11.7 to 24.0)        | -1.4 (-1.8 to -0.9)                            | -18.6 (-24.2 to -13.0)              |
| <b>Bahrain</b>                                | 23.3 (22.0 to 24.6)        | 9.8 (9.0 to 10.8)          | 9.6 (8.6 to 10.8)          | 7.5 (6.1 to 9.3)           | -1.8 (-3.0 to -0.6)                            | -23.7 (-36.2 to -8.0)               |
| <b>Egypt</b>                                  | 38.5 (30.5 to 48.1)        | 32.6 (23.2 to 41.2)        | 31.2 (21.3 to 40.2)        | 28.5 (19.1 to 37.1)        | -0.9 (-1.8 to -0.1)                            | -12.6 (-23.5 to -0.8)               |
| <b>Iran</b>                                   | 44.6 (42.5 to 49.2)        | 27.3 (26.7 to 28.4)        | 25.6 (25.1 to 26.8)        | 24.9 (21.8 to 28.2)        | -0.6 (-1.5 to 0.2)                             | -8.6 (-19.9 to 2.7)                 |
| <b>Iraq</b>                                   | 26.0 (19.1 to 30.1)        | 9.9 (9.2 to 10.9)          | 9.3 (8.6 to 10.3)          | 8.4 (7.5 to 9.5)           | -1.1 (-1.7 to -0.6)                            | -15.5 (-22.3 to -8.1)               |
| <b>Jordan</b>                                 | 19.9 (17.8 to 22.1)        | 11.8 (10.8 to 13.0)        | 11.5 (10.2 to 12.9)        | 8.9 (7.7 to 10.4)          | -1.9 (-2.6 to -1.2)                            | -24.4 (-32.0 to -16.1)              |
| <b>Kuwait</b>                                 | 23.3 (22.2 to 24.1)        | 14.1 (13.3 to 14.7)        | 13.6 (12.2 to 14.8)        | 11.6 (8.8 to 15.1)         | -1.4 (-3.2 to 0.3)                             | -17.9 (-38.0 to 4.9)                |
| <b>Lebanon</b>                                | 9.4 (8.2 to 10.8)          | 6.9 (4.6 to 8.3)           | 6.7 (4.5 to 8.2)           | 4.1 (2.5 to 5.4)           | -3.5 (-4.7 to -2.3)                            | -40.7 (-50.4 to -29.3)              |
| <b>Libya</b>                                  | 29.8 (19.9 to 42.8)        | 25.8 (13.3 to 39.5)        | 24.8 (12.8 to 38.5)        | 20.6 (10.3 to 32.0)        | -1.5 (-2.0 to -0.9)                            | -20.3 (-26.5 to -13.2)              |
| <b>Morocco</b>                                | 30.0 (24.6 to 47.2)        | 21.0 (15.9 to 34.3)        | 20.2 (14.9 to 33.2)        | 17.9 (13.2 to 29.5)        | -1.1 (-1.5 to -0.7)                            | -14.8 (-19.6 to -9.6)               |
| <b>Palestine</b>                              | 13.0 (11.8 to 14.1)        | 8.9 (8.0 to 9.8)           | 8.4 (7.5 to 9.3)           | 8.6 (7.0 to 10.8)          | -0.2 (-1.3 to 1.1)                             | -3.1 (-18.1 to 18.7)                |
| <b>Oman</b>                                   | 73.7 (62.0 to 87.8)        | 49.5 (40.7 to 58.6)        | 46.2 (37.7 to 55.0)        | 24.7 (19.5 to 30.4)        | -4.7 (-5.5 to -3.8)                            | -50.2 (-56.4 to -43.4)              |
| <b>Qatar</b>                                  | 39.4 (34.2 to 45.4)        | 24.6 (20.2 to 29.4)        | 24.3 (19.7 to 29.9)        | 21.7 (16.1 to 29.7)        | -0.9 (-2.2 to 0.9)                             | -11.7 (-28.5 to 15.2)               |
| <b>Saudi Arabia</b>                           | 41.5 (37.1 to 46.6)        | 37.9 (26.9 to 49.2)        | 36.0 (25.4 to 43.2)        | 24.5 (17.1 to 31.7)        | -2.9 (-4.1 to -1.9)                            | -35.4 (-46.0 to -24.4)              |
| <b>Sudan</b>                                  | 50.2 (38.1 to 74.4)        | 31.6 (23.7 to 48.7)        | 29.8 (22.5 to 46.4)        | 29.4 (21.9 to 45.5)        | -0.5 (-0.9 to 0.0)                             | -6.8 (-12.7 to 0.3)                 |
| <b>Syria</b>                                  | 15.7 (14.2 to 17.3)        | 11.6 (9.6 to 13.5)         | 11.3 (9.2 to 13.5)         | 10.7 (8.6 to 13.2)         | -0.5 (-1.3 to 0.3)                             | -7.3 (-17.5 to 4.1)                 |
| <b>Tunisia</b>                                | 43.7 (38.3 to 48.3)        | 30.8 (24.3 to 38.0)        | 29.6 (23.6 to 36.4)        | 26.1 (20.9 to 32.2)        | -1.1 (-1.7 to -0.5)                            | -15.2 (-22.5 to -7.5)               |
| <b>Turkey</b>                                 | 11.8 (10.6 to 13.1)        | 10.6 (9.8 to 11.3)         | 10.1 (9.1 to 11.2)         | 6.5 (5.3 to 8.0)           | -3.3 (-4.3 to -1.9)                            | -38.5 (-49.0 to -25.2)              |
| <b>United Arab Emirates</b>                   | 51.6 (43.9 to 60.8)        | 50.1 (40.2 to 61.1)        | 49.0 (38.7 to 59.9)        | 34.9 (26.8 to 43.9)        | -2.4 (-3.2 to -1.6)                            | -30.3 (-38.4 to -21.2)              |
| <b>Yemen</b>                                  | 57.8 (41.8 to 82.8)        | 38.3 (28.7 to 55.8)        | 37.7 (28.2 to 54.9)        | 33.0 (24.4 to 47.7)        | -1.0 (-1.4 to -0.6)                            | -14.0 (-19.5 to -8.6)               |
| <b>South Asia</b>                             |                            |                            |                            |                            |                                                |                                     |
| <b>Bangladesh</b>                             | 7.7 (6.7 to 8.8)           | 8.7 (7.1 to 10.1)          | 8.1 (6.3 to 9.4)           | 6.6 (5.2 to 7.9)           | -1.8 (-2.4 to -1.2)                            | -23.5 (-30.6 to -16.8)              |
| <b>Bhutan</b>                                 | 13.4 (11.4 to 15.6)        | 8.1 (6.2 to 9.8)           | 7.7 (5.8 to 9.4)           | 6.9 (5.2 to 8.4)           | -1.1 (-1.6 to -0.5)                            | -14.8 (-21.1 to -7.6)               |
| <b>India</b>                                  | 18.9 (17.9 to 19.8)        | 17.4 (16.5 to 18.2)        | 16.8 (15.4 to 17.8)        | 14.1 (12.1 to 16.2)        | -1.4 (-2.3 to -0.6)                            | -19.2 (-29.1 to -8.8)               |
| <b>Nepal</b>                                  | 28.4 (16.4 to 46.4)        | 27.0 (15.6 to 40.1)        | 26.1 (14.9 to 38.5)        | 23.4 (13.2 to 34.9)        | -0.9 (-1.4 to -0.3)                            | -13.0 (-19.2 to -5.0)               |
| <b>Pakistan</b>                               | 30.0 (20.1 to 37.1)        | 30.2 (18.2 to 39.0)        | 29.1 (17.6 to 38.0)        | 25.0 (14.8 to 33.2)        | -1.3 (-2.0 to -0.6)                            | -17.4 (-25.9 to -8.5)               |
| <b>Southeast Asia, East Asia, and Oceania</b> |                            |                            |                            |                            |                                                |                                     |
| <b>East Asia</b>                              |                            |                            |                            |                            |                                                |                                     |
| <b>China</b>                                  | 22.2 (21.2 to 23.0)        | 16.6 (15.9 to 17.1)        | 15.3 (14.5 to 15.9)        | 11.7 (10.3 to 13.3)        | -2.3 (-3.1 to -1.5)                            | -29.2 (-37.0 to -20.4)              |
| <b>North Korea</b>                            | 18.9 (13.9 to 27.7)        | 20.0 (13.6 to 29.9)        | 19.8 (13.2 to 29.9)        | 17.6 (11.7 to 27.1)        | -0.9 (-1.6 to -0.1)                            | -11.9 (-21.1 to -2.1)               |
| <b>Taiwan (Province of China)</b>             | 24.3 (23.9 to 24.8)        | 12.7 (12.4 to 13.0)        | 12.9 (12.1 to 13.7)        | 10.9 (9.5 to 12.6)         | -1.0 (-1.9 to -0.1)                            | -14.1 (-24.8 to -1.0)               |
| <b>Oceania</b>                                |                            |                            |                            |                            |                                                |                                     |
| <b>American Samoa</b>                         | 10.6 (9.8 to 11.4)         | 8.7 (8.0 to 9.4)           | 8.7 (7.9 to 9.4)           | 8.7 (7.8 to 9.8)           | 0.1 (-0.5 to 0.6)                              | 0.9 (-6.5 to 9.2)                   |
| <b>Federated States of Micronesia</b>         | 19.8 (15.9 to 25.2)        | 17.5 (12.5 to 22.1)        | 17.3 (12.0 to 21.7)        | 18.3 (12.6 to 24.0)        | 0.3 (-0.5 to 1.0)                              | 4.5 (-6.7 to 16.9)                  |
| <b>Fiji</b>                                   | 12.9 (12.0 to 13.7)        | 10.0 (9.0 to 11.0)         | 9.8 (8.6 to 11.2)          | 8.9 (7.3 to 11.2)          | -0.8 (-1.8 to 0.5)                             | -10.8 (-24.0 to 7.0)                |
| <b>Guam</b>                                   | 14.8 (13.9 to 15.8)        | 13.1 (11.9 to 14.3)        | 13.3 (12.0 to 14.7)        | 12.5 (10.5 to 14.9)        | -0.3 (-1.3 to 0.7)                             | -4.1 (-17.2 to 11.7)                |
| <b>Kiribati</b>                               | 13.4 (11.9 to 14.9)        | 11.3 (9.0 to 13.7)         | 11.0 (8.6 to 13.2)         | 10.6 (8.3 to 13.0)         | -0.5 (-1.0 to 0.0)                             | -6.9 (-13.3 to 0.4)                 |
| <b>Marshall Islands</b>                       | 27.2 (23.5 to 30.9)        | 24.0 (19.9 to 29.3)        | 24.0 (19.9 to 29.3)        | 23.8 (18.4 to 29.4)        | -0.3 (-1.0 to 0.3)                             | -4.0 (-13.7 to 5.2)                 |
| <b>Northern Mariana Islands</b>               | 13.8 (11.6 to 15.9)        | 10.7 (9.6 to 11.9)         | 10.9 (9.5 to 12.2)         | 11.4 (9.8 to 13.2)         | 0.4 (-0.2 to 1.1)                              | 6.7 (-3.0 to 17.1)                  |
| <b>Papua New Guinea</b>                       | 39.8 (32.4 to 47.6)        | 35.0 (28.1 to 42.8)        | 34.0 (27.4 to 41.4)        | 34.4 (27.4 to 41.9)        | -0.1 (-0.5 to 0.3)                             | -1.7 (-7.0 to 4.2)                  |
| <b>Samoa</b>                                  | 12.2 (9.9 to 16.8)         | 10.8 (8.7 to 15.3)         | 10.7 (8.5 to 14.9)         | 9.9 (7.9 to 14.2)          | -0.6 (-1.0 to -0.2)                            | -8.4 (-14.2 to -2.6)                |
| <b>Solomon Islands</b>                        | 24.1 (18.9 to 31.7)        | 21.8 (17.1 to 28.1)        | 21.3 (16.5 to 27.3)        | 20.8 (16.1 to 26.9)        | -0.3 (-0.8 to 0.1)                             | -4.9 (-10.7 to 1.4)                 |
| <b>Tonga</b>                                  | 12.7 (11.6 to 13.8)        | 12.2 (10.2 to 13.9)        | 11.9 (9.9 to 13.7)         | 12.5 (10.3 to 14.5)        | 0.1 (-0.3 to 0.6)                              | 2.1 (-3.8 to 9.2)                   |
| <b>Vanuatu</b>                                | 22.0 (15.9 to 30.0)        | 20.7 (14.6 to 28.6)        | 20.6 (14.5 to 28.1)        | 19.8 (13.8 to 27.1)        | -0.3 (-0.8 to 0.2)                             | -4.6 (-11.3 to 2.7)                 |
| <b>Southeast Asia</b>                         |                            |                            |                            |                            |                                                |                                     |
| <b>Cambodia</b>                               | 40.2 (32.0 to 50.6)        | 28.2 (22.6 to 36.3)        | 27.1 (21.7 to 34.5)        | 23.6 (18.4 to 30.1)        | -1.2 (-1.7 to -0.7)                            | -16.3 (-22.6 to -9.4)               |
| <b>Indonesia</b>                              | 25.1 (23.7 to 26.7)        | 14.7 (13.4 to 15.8)        | 14.2 (12.9 to 15.4)        | 7.3 (6.3 to 8.3)           | -4.7 (-5.4 to -4.0)                            | -50.5 (-55.3 to -45.5)              |
| <b>Laos</b>                                   | 40.8 (35.4 to 47.3)        | 27.9 (21.4 to 34.8)        | 26.9 (20.1 to 32.9)        | 17.1 (12.8 to 21.6)        | -3.3 (-3.8 to -2.7)                            | -38.7 (-43.2 to -33.5)              |
| <b>Malaysia</b>                               | 26.2 (25.2 to 27.2)        | 23.2 (21.2 to 24.9)        | 22.9 (20.2 to 25.6)        | 12.6 (10.6 to 15.0)        | -4.1 (-5.0 to -3.0)                            | -45.5 (-52.9 to -36.4)              |
| <b>Maldives</b>                               | 16.4 (13.8 to 24.1)        | 8.6 (6.5 to 14.9)          | 8.3 (6.2 to 14.4)          | 6.5 (4.5 to 11.6)          | -1.8 (-3.2 to -0.4)                            | -23.7 (-37.7 to -6.5)               |
| <b>Mauritius</b>                              | 14.4 (13.7 to 15.0)        | 11.8 (11.2 to 12.4)        | 11.2 (10.2 to 12.3)        | 7.3 (6.2 to 8.6)           | -3.2 (-4.2 to -2.2)                            | -38.1 (-46.8 to -28.2)              |
| <b>Myanmar</b>                                | 32.9 (28.3 to 38.0)        | 21.4 (18.2 to 25.2)        | 20.3 (17.3 to 24.1)        | 18.3 (15.2 to 21.9)        | -1.1 (-1.7 to -0.5)                            | -14.7 (-22.5 to -6.7)               |
| <b>Philippines</b>                            | 10.8 (10.2 to 11.4)        | 12.0 (10.9 to 13.1)        | 11.3 (9.9 to 13.0)         | 10.6 (8.9 to 12.6)         | -0.8 (-1.8 to 0.1)                             | -11.5 (-23.8 to 1.6)                |
| <b>Sri Lanka</b>                              | 17.0 (16.1 to 17.9)        | 12.8 (11.1 to 14.6)        | 12.1 (10.1 to 14.3)        | 8.5 (6.5 to 11.1)          | -2.8 (-4.2 to -1.3)                            | -33.8 (-46.8 to -17.3)              |
| <b>Seychelles</b>                             | 15.6 (14.2 to 16.8)        | 13.2 (11.9 to 14.6)        | 13.1 (11.4 to 14.7)        | 11.0 (9.2 to 13.1)         | -1.2 (-2.0 to -0.3)                            | -16.9 (-26.1 to -4.8)               |
| <b>Thailand</b>                               | 44.6 (41.2 to 48.4)        | 23.7 (22.2 to 25.4)        | 24.2 (21.3 to 27.0)        | 12.4 (9.7 to 16.7)         | -4.4 (-6.0 to -2.4)                            | -47.6 (-59.1 to -30.7)              |

|                                                                                                                                                         | Estimate in 2000 (95% UIs) | Estimate in 2015 (95% UIs) | Estimate in 2017 (95% UIs) | Estimate in 2030 (95% UIs) | Annualised rate of change, 2015-2030 (95% UIs) | Percent change, 2015-2030 (95% UIs) |
|---------------------------------------------------------------------------------------------------------------------------------------------------------|----------------------------|----------------------------|----------------------------|----------------------------|------------------------------------------------|-------------------------------------|
| Timor-Leste                                                                                                                                             | 13.1 (7.4 to 25.5)         | 10.3 (6.0 to 18.0)         | 10.3 (6.1 to 17.9)         | 9.6 (5.6 to 16.8)          | -0.5 (-1.2 to 0.2)                             | -7.2 (-16.0 to 3.8)                 |
| Vietnam                                                                                                                                                 | 23.7 (21.0 to 26.7)        | 21.9 (18.8 to 24.4)        | 21.0 (17.8 to 23.7)        | 17.5 (14.6 to 20.9)        | -1.5 (-2.2 to -0.6)                            | -19.9 (-28.6 to -9.1)               |
| <b>Sub-Saharan Africa</b>                                                                                                                               |                            |                            |                            |                            |                                                |                                     |
| <b>Central Sub-Saharan Africa</b>                                                                                                                       |                            |                            |                            |                            |                                                |                                     |
| Angola                                                                                                                                                  | 50.3 (42.1 to 59.3)        | 30.0 (24.8 to 36.5)        | 28.1 (23.1 to 34.2)        | 28.4 (22.2 to 37.1)        | -0.4 (-1.4 to 0.8)                             | -5.1 (-19.0 to 13.0)                |
| Central African Republic                                                                                                                                | 86.2 (57.7 to 109.2)       | 86.5 (50.1 to 112.7)       | 83.8 (49.7 to 109.1)       | 92.7 (54.5 to 127.3)       | 0.4 (-0.8 to 1.6)                              | 7.3 (-10.7 to 26.7)                 |
| Congo                                                                                                                                                   | 43.5 (35.0 to 50.5)        | 28.7 (22.8 to 35.6)        | 28.0 (22.0 to 34.8)        | 30.8 (21.9 to 42.2)        | 0.4 (-1.1 to 2.1)                              | 7.3 (-15.6 to 36.9)                 |
| Democratic Republic of the Congo                                                                                                                        | 34.8 (27.9 to 41.5)        | 29.6 (23.7 to 36.4)        | 28.3 (22.6 to 35.1)        | 29.1 (22.1 to 37.9)        | -0.1 (-1.0 to 1.0)                             | -1.6 (-14.3 to 16.8)                |
| Equatorial Guinea                                                                                                                                       | 38.6 (28.6 to 50.1)        | 20.7 (13.9 to 29.7)        | 20.5 (14.0 to 29.6)        | 21.3 (14.0 to 31.6)        | 0.2 (-1.3 to 1.7)                              | 3.1 (-17.2 to 29.6)                 |
| Gabon                                                                                                                                                   | 36.2 (30.2 to 44.9)        | 29.5 (23.7 to 36.8)        | 27.9 (22.2 to 35.0)        | 28.6 (21.6 to 36.9)        | -0.2 (-1.4 to 0.9)                             | -3.0 (-19.0 to 14.8)                |
| <b>Eastern Sub-Saharan Africa</b>                                                                                                                       |                            |                            |                            |                            |                                                |                                     |
| Burundi                                                                                                                                                 | 45.4 (37.2 to 54.5)        | 35.4 (28.0 to 47.1)        | 34.4 (27.1 to 45.7)        | 31.2 (23.7 to 42.2)        | -0.8 (-1.9 to 0.3)                             | -11.6 (-24.7 to 4.0)                |
| Comoros                                                                                                                                                 | 25.8 (21.3 to 32.4)        | 20.8 (17.5 to 25.0)        | 20.3 (16.9 to 24.3)        | 21.9 (17.8 to 26.7)        | 0.3 (-0.3 to 1.0)                              | 4.9 (-3.8 to 16.4)                  |
| Djibouti                                                                                                                                                | 31.8 (23.4 to 43.5)        | 23.4 (16.6 to 32.1)        | 22.6 (16.3 to 31.4)        | 20.8 (14.8 to 29.4)        | -0.8 (-1.6 to 0.0)                             | -10.8 (-20.8 to 0.4)                |
| Eritrea                                                                                                                                                 | 47.9 (29.4 to 59.1)        | 34.2 (25.1 to 41.8)        | 32.4 (24.1 to 39.8)        | 36.4 (24.1 to 45.5)        | 0.4 (-0.4 to 1.1)                              | 6.5 (-5.5 to 18.7)                  |
| Ethiopia                                                                                                                                                | 27.2 (24.1 to 29.9)        | 15.8 (14.4 to 17.2)        | 15.1 (13.8 to 16.6)        | 15.1 (12.9 to 17.5)        | -0.4 (-1.2 to 0.5)                             | -5.0 (-16.0 to 8.4)                 |
| Kenya                                                                                                                                                   | 21.3 (18.9 to 26.3)        | 18.5 (16.8 to 20.8)        | 17.8 (16.2 to 20.2)        | 18.3 (15.2 to 22.2)        | -0.1 (-1.0 to 1.2)                             | -0.9 (-14.0 to 19.3)                |
| Madagascar                                                                                                                                              | 26.6 (23.2 to 30.4)        | 21.0 (17.3 to 25.5)        | 20.4 (16.7 to 24.6)        | 20.3 (16.5 to 24.5)        | -0.2 (-0.7 to 0.2)                             | -3.3 (-9.8 to 3.8)                  |
| Malawi                                                                                                                                                  | 28.3 (24.4 to 31.8)        | 19.8 (17.2 to 22.6)        | 19.1 (16.4 to 22.0)        | 19.8 (15.6 to 25.2)        | -0.1 (-1.3 to 1.4)                             | -0.2 (-17.6 to 22.9)                |
| Mozambique                                                                                                                                              | 35.2 (30.4 to 40.4)        | 28.5 (24.1 to 32.9)        | 27.0 (22.9 to 31.3)        | 29.0 (23.1 to 35.7)        | 0.1 (-0.8 to 1.0)                              | 1.8 (-11.9 to 16.4)                 |
| Rwanda                                                                                                                                                  | 56.4 (43.5 to 67.6)        | 34.2 (23.3 to 45.8)        | 32.6 (22.3 to 43.8)        | 30.7 (19.3 to 46.8)        | -0.8 (-2.6 to 1.2)                             | -10.1 (-32.0 to 19.4)               |
| Somalia                                                                                                                                                 | 58.9 (35.2 to 80.8)        | 52.0 (28.1 to 73.6)        | 50.1 (27.3 to 70.6)        | 55.0 (28.9 to 77.9)        | 0.4 (-0.2 to 0.9)                              | 5.8 (-2.8 to 15.0)                  |
| South Sudan                                                                                                                                             | 31.0 (21.7 to 42.6)        | 28.4 (20.9 to 39.3)        | 27.7 (20.5 to 38.3)        | 29.1 (20.8 to 41.8)        | 0.2 (-0.6 to 1.2)                              | 2.8 (-9.2 to 18.9)                  |
| Tanzania                                                                                                                                                | 18.8 (16.4 to 21.6)        | 15.5 (13.6 to 17.6)        | 15.1 (13.1 to 17.4)        | 14.8 (12.5 to 17.4)        | -0.3 (-1.0 to 0.4)                             | -4.5 (-13.6 to 5.6)                 |
| Uganda                                                                                                                                                  | 33.8 (27.1 to 41.8)        | 26.8 (19.5 to 34.6)        | 25.6 (18.5 to 32.7)        | 26.2 (18.3 to 34.7)        | -0.2 (-1.1 to 0.7)                             | -2.3 (-15.7 to 11.1)                |
| Zambia                                                                                                                                                  | 30.7 (25.9 to 34.5)        | 20.0 (17.9 to 22.6)        | 19.4 (16.9 to 22.2)        | 18.0 (12.9 to 23.8)        | -0.8 (-2.7 to 0.9)                             | -10.1 (-33.8 to 13.9)               |
| <b>Southern Sub-Saharan Africa</b>                                                                                                                      |                            |                            |                            |                            |                                                |                                     |
| Botswana                                                                                                                                                | 16.5 (12.8 to 21.1)        | 15.7 (13.1 to 17.8)        | 14.8 (12.4 to 16.7)        | 13.4 (10.0 to 18.6)        | -1.1 (-2.6 to 1.3)                             | -14.3 (-32.7 to 21.0)               |
| Lesotho                                                                                                                                                 | 42.3 (35.1 to 50.8)        | 48.0 (37.6 to 58.3)        | 44.1 (35.0 to 53.4)        | 46.1 (30.6 to 66.8)        | -0.4 (-2.3 to 1.8)                             | -3.9 (-29.7 to 30.7)                |
| Namibia                                                                                                                                                 | 38.4 (33.0 to 44.2)        | 22.3 (18.1 to 27.6)        | 21.6 (17.4 to 27.0)        | 19.6 (14.5 to 26.4)        | -0.9 (-2.3 to 0.7)                             | -11.8 (-29.3 to 10.3)               |
| South Africa                                                                                                                                            | 60.5 (57.6 to 64.3)        | 27.8 (26.1 to 30.2)        | 27.7 (26.0 to 29.8)        | 29.4 (20.9 to 46.5)        | 0.2 (-1.8 to 3.4)                              | 5.5 (-23.7 to 65.6)                 |
| Swaziland                                                                                                                                               | 47.2 (38.9 to 55.2)        | 41.1 (30.4 to 50.5)        | 37.0 (28.3 to 45.3)        | 36.0 (24.5 to 49.8)        | -0.9 (-2.9 to 1.3)                             | -12.1 (-35.3 to 21.2)               |
| Zimbabwe                                                                                                                                                | 33.7 (25.8 to 40.3)        | 26.2 (18.9 to 34.9)        | 24.9 (18.0 to 33.6)        | 28.9 (16.0 to 51.3)        | 0.4 (-2.5 to 4.4)                              | 10.6 (-31.4 to 92.5)                |
| <b>Western Sub-Saharan Africa</b>                                                                                                                       |                            |                            |                            |                            |                                                |                                     |
| Benin                                                                                                                                                   | 55.1 (31.9 to 74.2)        | 43.0 (25.7 to 58.6)        | 40.8 (24.5 to 54.9)        | 33.0 (19.4 to 45.6)        | -1.8 (-2.4 to -1.1)                            | -23.3 (-29.7 to -15.8)              |
| Burkina Faso                                                                                                                                            | 26.0 (22.5 to 29.9)        | 24.4 (20.6 to 27.9)        | 23.8 (19.9 to 27.6)        | 20.8 (17.2 to 24.6)        | -1.1 (-1.6 to -0.5)                            | -14.9 (-21.8 to -7.7)               |
| Cameroon                                                                                                                                                | 30.9 (26.1 to 35.3)        | 23.9 (19.1 to 29.0)        | 22.6 (17.9 to 27.9)        | 24.7 (19.0 to 31.4)        | 0.2 (-0.5 to 1.0)                              | 3.4 (-6.7 to 16.7)                  |
| Cape Verde                                                                                                                                              | 11.5 (9.5 to 13.3)         | 8.4 (7.4 to 9.3)           | 8.2 (7.0 to 9.3)           | 7.5 (6.2 to 8.7)           | -0.8 (-1.6 to -0.1)                            | -11.0 (-20.9 to -1.7)               |
| Chad                                                                                                                                                    | 26.2 (20.6 to 35.2)        | 25.7 (20.3 to 33.2)        | 25.0 (20.3 to 32.0)        | 25.5 (20.3 to 33.0)        | -0.1 (-0.7 to 0.7)                             | -0.6 (-10.4 to 10.9)                |
| Cote d'Ivoire                                                                                                                                           | 28.6 (24.5 to 32.9)        | 23.0 (19.7 to 26.6)        | 21.7 (18.5 to 25.3)        | 21.1 (17.8 to 25.0)        | -0.6 (-1.1 to 0.0)                             | -8.0 (-15.5 to 0.2)                 |
| The Gambia                                                                                                                                              | 22.3 (18.4 to 26.6)        | 21.2 (16.9 to 26.6)        | 20.7 (16.9 to 24.8)        | 21.3 (16.9 to 26.2)        | 0.0 (-0.5 to 0.6)                              | 0.2 (-7.8 to 9.3)                   |
| Ghana                                                                                                                                                   | 25.1 (22.0 to 28.9)        | 24.7 (21.4 to 28.2)        | 23.9 (20.7 to 27.4)        | 23.6 (19.6 to 28.4)        | -0.3 (-1.1 to 0.5)                             | -4.7 (-14.6 to 7.1)                 |
| Guinea                                                                                                                                                  | 26.6 (22.4 to 33.4)        | 24.9 (21.2 to 29.1)        | 23.9 (20.3 to 28.1)        | 24.4 (19.8 to 29.8)        | -0.1 (-1.0 to 0.7)                             | -1.8 (-13.5 to 11.4)                |
| Guinea-Bissau                                                                                                                                           | 45.8 (38.9 to 53.8)        | 33.4 (27.9 to 39.9)        | 32.0 (26.6 to 38.5)        | 32.0 (26.6 to 38.6)        | -0.3 (-0.8 to 0.2)                             | -4.3 (-10.9 to 2.7)                 |
| Liberia                                                                                                                                                 | 21.4 (18.3 to 24.5)        | 16.2 (13.5 to 19.3)        | 15.6 (12.8 to 18.9)        | 16.7 (13.3 to 21.0)        | 0.2 (-0.6 to 1.0)                              | 2.7 (-8.6 to 15.4)                  |
| Mali                                                                                                                                                    | 24.3 (20.0 to 32.1)        | 19.7 (16.1 to 26.2)        | 19.7 (16.2 to 26.2)        | 19.3 (15.5 to 26.2)        | -0.2 (-0.7 to 0.4)                             | -2.3 (-10.6 to 6.7)                 |
| Mauritania                                                                                                                                              | 32.8 (27.6 to 38.0)        | 23.8 (20.0 to 27.5)        | 22.9 (19.0 to 26.8)        | 23.8 (19.1 to 28.9)        | 0.0 (-0.8 to 0.9)                              | 0.4 (-11.4 to 14.8)                 |
| Niger                                                                                                                                                   | 23.5 (18.5 to 31.0)        | 18.0 (13.1 to 23.9)        | 17.8 (13.1 to 23.8)        | 18.1 (13.2 to 24.2)        | 0.0 (-0.5 to 0.5)                              | 0.4 (-7.1 to 8.5)                   |
| Nigeria                                                                                                                                                 | 16.6 (11.6 to 22.4)        | 13.4 (9.7 to 17.9)         | 13.3 (9.7 to 17.6)         | 11.9 (8.7 to 16.2)         | -0.8 (-1.4 to -0.1)                            | -10.8 (-18.6 to -2.2)               |
| Sao Tome and Principe                                                                                                                                   | 15.3 (11.9 to 17.9)        | 16.2 (10.2 to 20.2)        | 15.6 (9.7 to 19.8)         | 16.4 (9.9 to 21.7)         | 0.1 (-0.9 to 1.1)                              | 1.1 (-12.2 to 18.8)                 |
| Senegal                                                                                                                                                 | 19.9 (16.3 to 27.9)        | 17.6 (14.4 to 24.9)        | 17.4 (14.3 to 24.2)        | 17.2 (13.7 to 24.1)        | -0.2 (-0.8 to 0.5)                             | -2.1 (-10.8 to 8.0)                 |
| Sierra Leone                                                                                                                                            | 27.2 (22.4 to 34.3)        | 23.4 (19.8 to 28.1)        | 22.3 (18.8 to 27.0)        | 24.1 (19.6 to 30.1)        | 0.2 (-0.6 to 0.9)                              | 2.8 (-8.4 to 15.2)                  |
| Togo                                                                                                                                                    | 25.9 (21.3 to 33.3)        | 23.1 (19.1 to 27.4)        | 22.1 (18.1 to 26.6)        | 22.7 (17.9 to 28.4)        | -0.1 (-0.9 to 0.8)                             | -1.7 (-12.8 to 12.3)                |
| <b>Indicator 3.7.1: Proportion of women of reproductive age (15-49 years) who have their need for family planning satisfied with modern methods (%)</b> |                            |                            |                            |                            |                                                |                                     |
| <b>Central Europe, Eastern Europe, and Central Asia</b>                                                                                                 |                            |                            |                            |                            |                                                |                                     |
| <b>Central Asia</b>                                                                                                                                     |                            |                            |                            |                            |                                                |                                     |
| Armenia                                                                                                                                                 | 27.2 (25.0 to 29.7)        | 40.2 (37.5 to 42.8)        | 41.3 (37.8 to 44.6)        | 47.0 (43.5 to 50.4)        | 1.0 (0.8 to 1.4)                               | 17.0 (11.9 to 22.6)                 |
| Azerbaijan                                                                                                                                              | 20.2 (17.9 to 22.5)        | 30.5 (25.0 to 36.2)        | 32.0 (25.7 to 38.1)        | 37.3 (30.9 to 44.1)        | 1.4 (0.9 to 1.9)                               | 22.6 (13.6 to 32.4)                 |
| Georgia                                                                                                                                                 | 39.2 (34.5 to 44.2)        | 51.2 (45.1 to 57.5)        | 52.7 (46.0 to 59.2)        | 57.5 (50.6 to 64.1)        | 0.8 (0.4 to 1.1)                               | 12.3 (6.7 to 17.9)                  |
| Kazakhstan                                                                                                                                              | 65.6 (63.2 to 67.9)        | 77.3 (75.0 to 79.3)        | 78.8 (76.2 to 81.2)        | 84.7 (82.6 to 86.7)        | 0.6 (0.5 to 0.7)                               | 9.6 (8.2 to 11.0)                   |
| Kyrgyzstan                                                                                                                                              | 66.4 (62.7 to 70.1)        | 65.7 (60.6 to 68.8)        | 64.8 (61.2 to 68.8)        | 67.7 (64.1 to 71.3)        | 0.0 (-0.5 to 0.6)                              | 6.3 (3.9 to 8.7)                    |
| Mongolia                                                                                                                                                | 72.5 (68.8 to 75.9)        | 67.8 (64.1 to 71.2)        | 68.4 (64.2 to 72.5)        | 70.6 (66.3 to 74.6)        | 0.2 (0.1 to 0.4)                               | 4.2 (1.4 to 6.9)                    |
| Tajikistan                                                                                                                                              | 48.6 (42.9 to 54.3)        | 52.3 (49.9 to 54.4)        | 52.5 (50.0 to 55.0)        | 58.0 (55.5 to 60.5)        | 0.7 (0.5 to 0.9)                               | 11.1 (8.3 to 13.9)                  |
| Turkmenistan                                                                                                                                            | 56.9 (52.6 to 61.1)        | 73.6 (71.3 to 75.8)        | 75.0 (72.4 to 77.4)        | 81.9 (79.8 to 83.8)        | 0.7 (0.6 to 0.8)                               | 11.3 (9.8 to 12.8)                  |
| Uzbekistan                                                                                                                                              | 75.6 (72.9 to 78.2)        | 82.0 (76.9 to 85.9)        | 82.8 (77.8 to 86.8)        | 87.4 (83.4 to 90.5)        | 0.4 (0.3 to 0.6)                               | 6.7 (4.7 to 9.0)                    |
| <b>Central Europe</b>                                                                                                                                   |                            |                            |                            |                            |                                                |                                     |
| Albania                                                                                                                                                 | 17.1 (14.3 to 20.4)        | 21.1 (17.1 to 25.8)        | 22.2 (17.7 to 27.6)        | 26.7 (21.3 to 32.9)        | 1.6 (1.0 to 2.1)                               | 26.6 (16.2 to 36.9)                 |
| Bosnia and Herzegovina                                                                                                                                  | 24.3 (19.8 to 29.5)        | 25.0 (21.2 to 29.1)        | 25.7 (21.4 to 30.1)        | 30.6 (26.0 to 35.5)        | 1.3 (1.0 to 1.7)                               | 22.5 (16.2 to 29.2)                 |
| Bulgaria                                                                                                                                                | 52.8 (45.6 to 59.2)        | 58.0 (50.6 to 66.2)        | 58.6 (50.6 to 66.7)        | 61.5 (53.3 to 69.3)        | 0.4 (0.1 to 0.7)                               | 6.1 (1.6 to 10.4)                   |
| Croatia                                                                                                                                                 | 48.9 (40.6 to 57.7)        | 47.7 (39.1 to 56.0)        | 48.2 (39.8 to 56.6)        | 50.4 (41.9 to 58.6)        | 0.4 (0.1 to 0.7)                               | 5.7 (1.8 to 10.2)                   |
| Czech Republic                                                                                                                                          | 66.9 (61.4 to 72.2)        | 75.4 (69.0 to 81.2)        | 75.6 (69.3 to 81.6)        | 80.6 (75.2 to 85.0)        | 0.5 (0.3 to 0.6)                               | 7.0 (4.4 to 10.1)                   |
| Hungary                                                                                                                                                 | 67.4 (60.5 to 73.8)        | 63.3 (55.2 to 71.3)        | 63.3 (55.1 to 71.3)        | 65.5 (57.5 to 72.2)        | 0.2 (0.1 to 0.4)                               | 3.5 (0.8 to 6.3)                    |
| Macedonia                                                                                                                                               | 16.0 (12.7 to 20.1)        | 19.1 (16.1 to 22.3)        | 19.8 (16.4 to 23.8)        | 23.8 (19.8 to 28.3)        | 1.5 (1.1 to 1.8)                               | 24.8 (18.1 to 31.1)                 |
| Montenegro                                                                                                                                              | 42.7 (36.7 to 48.9)        | 43.6 (39.4 to 48.1)        | 44.4 (39.4 to 49.4)        | 47.5 (42.4 to 52.5)        | 0.6 (0.3 to 0.8)                               | 8.9 (5.2 to 12.4)                   |
| Poland                                                                                                                                                  | 41.2 (34.0 to 49.1)        | 50.1 (41.4 to 58.5)        | 50.9 (42.1 to 59.2)        | 57.4 (48.6 to 65.7)        | 0.9 (0.5 to 1.4)                               | 14.8 (7.5 to 22.8)                  |
| Romania                                                                                                                                                 | 43.2 (36.9 to 49.8)        | 52.9 (45.0 to 60.3)        | 53.4 (45.5 to 60.9)        | 61.6 (54.2 to 68.6)        | 1.0 (0.7 to 1.4)                               | 16.7 (11.8 to 22.6)                 |
| Serbia                                                                                                                                                  | 42.0 (36.3 to 48.2)        | 36.5 (31.4 to 41.8)        | 36.7 (31.4 to 42.2)        | 40.5 (34.6 to 46.3)        | 0.7 (0.4 to 0.9)                               | 10.7 (6.3 to 15.2)                  |
| Slovakia                                                                                                                                                | 75.2 (69.1 to 80.3)        | 75.6 (69.3 to 81.3)        | 75.9 (69.7 to 81.5)        | 77.9 (71.8 to 83.5)        | 0.2 (0.0 to 0.4)                               | 3.1 (0.4 to 5.9)                    |
| Slovenia                                                                                                                                                | 70.1 (63.3 to 76.0)        | 69.7 (62.3 to 76.6)        | 70.2 (63.0 to 77.1)        | 71.9 (64.7 to 78.7)        | 0.2 (0.0 to 0.4)                               | 3.2 (0.7 to 6.2)                    |
| <b>Eastern Europe</b>                                                                                                                                   |                            |                            |                            |                            |                                                |                                     |

|                                  | Estimate in 2000 (95% UIs) | Estimate in 2015 (95% UIs) | Estimate in 2017 (95% UIs) | Estimate in 2030 (95% UIs) | Annualised rate of change, 2015-2030 (95% UIs) | Percent change, 2015-2030 (95% UIs) |
|----------------------------------|----------------------------|----------------------------|----------------------------|----------------------------|------------------------------------------------|-------------------------------------|
| Belarus                          | 64.8 (58.7 to 70.2)        | 71.7 (68.5 to 74.7)        | 72.5 (68.7 to 76.0)        | 75.3 (71.3 to 78.8)        | 0.3 (0.2 to 0.5)                               | 5.0 (2.5 to 7.4)                    |
| Estonia                          | 67.3 (60.4 to 73.7)        | 74.8 (68.3 to 80.5)        | 75.1 (68.6 to 80.8)        | 78.6 (73.0 to 83.9)        | 0.3 (0.2 to 0.5)                               | 5.2 (2.5 to 8.4)                    |
| Latvia                           | 59.7 (52.9 to 66.3)        | 71.3 (65.3 to 77.3)        | 71.9 (65.8 to 77.8)        | 78.0 (72.8 to 83.2)        | 0.6 (0.4 to 0.8)                               | 9.5 (5.9 to 13.5)                   |
| Lithuania                        | 56.7 (49.5 to 63.2)        | 70.2 (63.6 to 76.2)        | 70.5 (63.8 to 76.6)        | 78.6 (72.8 to 83.4)        | 0.8 (0.5 to 1.0)                               | 12.0 (8.5 to 16.0)                  |
| Moldova                          | 55.1 (51.7 to 58.3)        | 59.0 (55.7 to 62.7)        | 60.1 (55.8 to 64.3)        | 62.6 (58.2 to 66.8)        | 0.4 (0.1 to 0.6)                               | 6.0 (2.1 to 9.9)                    |
| Russia                           | 49.6 (46.6 to 52.8)        | 61.9 (55.7 to 67.8)        | 62.2 (55.4 to 68.5)        | 64.9 (58.4 to 71.8)        | 0.3 (0.0 to 0.6)                               | 4.9 (0.3 to 9.8)                    |
| Ukraine                          | 60.0 (55.3 to 64.5)        | 66.0 (61.0 to 70.7)        | 66.8 (61.2 to 72.0)        | 71.6 (66.2 to 76.4)        | 0.5 (0.3 to 0.8)                               | 8.4 (4.8 to 12.4)                   |
| High-income                      |                            |                            |                            |                            |                                                |                                     |
| Australasia                      |                            |                            |                            |                            |                                                |                                     |
| Australia                        | 85.7 (81.2 to 89.0)        | 88.1 (84.4 to 91.2)        | 88.3 (85.0 to 91.4)        | 90.7 (87.8 to 93.3)        | 0.2 (0.1 to 0.3)                               | 3.0 (1.8 to 4.5)                    |
| New Zealand                      | 79.9 (74.6 to 84.2)        | 82.7 (77.8 to 87.0)        | 83.0 (78.2 to 87.2)        | 85.5 (81.2 to 89.3)        | 0.2 (0.1 to 0.3)                               | 3.4 (2.1 to 5.0)                    |
| High-income Asia Pacific         |                            |                            |                            |                            |                                                |                                     |
| Brunei                           | 67.2 (60.0 to 74.0)        | 71.8 (64.6 to 78.1)        | 72.3 (65.7 to 78.4)        | 75.6 (69.4 to 81.1)        | 0.3 (0.2 to 0.5)                               | 5.4 (3.1 to 8.0)                    |
| Japan                            | 61.9 (57.3 to 66.3)        | 62.9 (55.5 to 70.2)        | 63.5 (56.2 to 71.0)        | 65.5 (58.3 to 72.5)        | 0.3 (0.1 to 0.5)                               | 4.2 (1.4 to 7.4)                    |
| South Korea                      | 72.0 (67.6 to 75.9)        | 75.1 (70.5 to 79.4)        | 76.3 (71.5 to 80.8)        | 81.3 (77.4 to 85.1)        | 0.5 (0.4 to 0.7)                               | 8.4 (6.6 to 10.3)                   |
| Singapore                        | 66.6 (60.2 to 72.4)        | 74.1 (66.9 to 80.0)        | 74.6 (67.6 to 80.5)        | 79.2 (73.0 to 84.3)        | 0.4 (0.3 to 0.6)                               | 7.0 (4.7 to 9.6)                    |
| High-income North America        |                            |                            |                            |                            |                                                |                                     |
| Canada                           | 84.9 (81.7 to 87.9)        | 86.1 (82.1 to 89.7)        | 86.3 (81.9 to 89.8)        | 88.1 (84.2 to 91.2)        | 0.1 (0.1 to 0.2)                               | 2.3 (1.2 to 3.5)                    |
| Greenland                        | 72.7 (65.5 to 79.2)        | 76.0 (69.5 to 81.4)        | 75.9 (69.4 to 81.2)        | 79.3 (73.5 to 84.2)        | 0.3 (0.1 to 0.5)                               | 4.5 (1.9 to 7.3)                    |
| United States                    | 80.5 (76.9 to 83.8)        | 82.6 (78.2 to 86.0)        | 82.8 (78.3 to 86.4)        | 85.3 (81.3 to 88.5)        | 0.2 (0.1 to 0.3)                               | 3.3 (2.2 to 4.5)                    |
| Southern Latin America           |                            |                            |                            |                            |                                                |                                     |
| Argentina                        | 67.1 (61.1 to 73.0)        | 73.6 (68.0 to 78.4)        | 74.3 (68.8 to 79.0)        | 78.8 (73.9 to 82.9)        | 0.5 (0.3 to 0.6)                               | 7.1 (5.3 to 9.3)                    |
| Chile                            | 68.4 (61.8 to 74.3)        | 75.5 (69.6 to 81.0)        | 76.0 (70.0 to 81.3)        | 81.3 (76.3 to 85.8)        | 0.5 (0.3 to 0.7)                               | 7.7 (5.4 to 10.4)                   |
| Uruguay                          | 65.8 (58.2 to 72.8)        | 72.7 (65.8 to 78.4)        | 73.6 (66.6 to 79.2)        | 78.0 (72.0 to 82.0)        | 0.5 (0.3 to 0.6)                               | 7.4 (5.2 to 10.1)                   |
| Western Europe                   |                            |                            |                            |                            |                                                |                                     |
| Andorra                          | 86.1 (81.4 to 89.9)        | 87.9 (83.8 to 91.2)        | 88.1 (83.9 to 91.4)        | 89.7 (85.9 to 92.7)        | 0.1 (0.1 to 0.2)                               | 2.1 (1.1 to 3.2)                    |
| Austria                          | 72.5 (66.5 to 77.8)        | 81.4 (76.3 to 85.9)        | 81.6 (76.4 to 86.1)        | 86.4 (82.2 to 89.9)        | 0.4 (0.3 to 0.5)                               | 6.1 (4.2 to 8.4)                    |
| Belgium                          | 81.4 (75.9 to 86.1)        | 84.9 (80.0 to 88.8)        | 85.0 (79.9 to 89.0)        | 87.4 (82.9 to 90.8)        | 0.2 (0.1 to 0.3)                               | 3.0 (1.8 to 4.4)                    |
| Cyprus                           | 81.6 (76.0 to 86.3)        | 85.6 (80.6 to 89.5)        | 85.7 (80.7 to 89.6)        | 90.1 (86.4 to 92.8)        | 0.3 (0.2 to 0.5)                               | 5.2 (3.4 to 7.5)                    |
| Denmark                          | 78.2 (72.5 to 83.4)        | 79.9 (74.3 to 84.7)        | 80.0 (74.6 to 84.9)        | 81.3 (75.9 to 85.9)        | 0.1 (0.0 to 0.2)                               | 1.8 (0.1 to 3.5)                    |
| Finland                          | 88.2 (84.4 to 91.1)        | 89.5 (86.2 to 92.3)        | 89.5 (86.3 to 92.3)        | 90.9 (88.1 to 93.3)        | 0.1 (0.1 to 0.2)                               | 1.7 (0.9 to 2.6)                    |
| France                           | 89.0 (87.0 to 91.0)        | 91.5 (88.8 to 93.6)        | 91.6 (88.8 to 93.7)        | 93.3 (91.0 to 95.0)        | 0.1 (0.1 to 0.2)                               | 2.0 (1.3 to 2.9)                    |
| Germany                          | 79.1 (74.0 to 83.6)        | 82.6 (77.1 to 86.8)        | 82.8 (77.3 to 87.1)        | 86.2 (81.7 to 89.9)        | 0.3 (0.2 to 0.4)                               | 4.5 (2.8 to 6.5)                    |
| Greece                           | 51.2 (44.0 to 58.5)        | 60.3 (52.5 to 67.9)        | 60.4 (52.3 to 68.3)        | 66.0 (58.6 to 73.4)        | 0.6 (0.4 to 0.8)                               | 9.6 (6.2 to 13.4)                   |
| Iceland                          | 85.3 (80.8 to 89.2)        | 87.9 (84.2 to 91.3)        | 88.1 (84.3 to 91.4)        | 90.4 (87.2 to 91.4)        | 0.2 (0.1 to 0.3)                               | 2.8 (1.7 to 4.2)                    |
| Ireland                          | 75.5 (70.7 to 79.9)        | 78.7 (73.4 to 83.4)        | 79.2 (73.5 to 84.2)        | 84.8 (80.4 to 88.4)        | 0.5 (0.3 to 0.7)                               | 7.9 (5.2 to 10.9)                   |
| Israel                           | 80.5 (74.7 to 85.5)        | 82.4 (76.9 to 87.2)        | 82.8 (77.3 to 87.2)        | 85.6 (80.8 to 89.5)        | 0.3 (0.2 to 0.4)                               | 3.9 (2.5 to 5.7)                    |
| Italy                            | 62.5 (55.9 to 68.8)        | 70.0 (63.1 to 76.1)        | 70.3 (63.6 to 76.6)        | 75.4 (69.1 to 80.7)        | 0.5 (0.3 to 0.7)                               | 7.6 (5.1 to 10.5)                   |
| Luxembourg                       | 86.7 (82.4 to 90.6)        | 88.5 (84.3 to 91.8)        | 88.6 (84.3 to 91.8)        | 90.3 (86.7 to 93.1)        | 0.1 (0.1 to 0.2)                               | 2.1 (1.2 to 3.3)                    |
| Malta                            | 67.7 (60.8 to 73.9)        | 74.4 (67.7 to 80.2)        | 75.0 (68.5 to 80.5)        | 80.2 (74.5 to 85.3)        | 0.5 (0.3 to 0.7)                               | 7.9 (5.0 to 11.1)                   |
| Netherlands                      | 77.4 (72.3 to 81.6)        | 82.1 (77.7 to 86.1)        | 82.4 (77.7 to 86.4)        | 82.4 (80.2 to 88.2)        | 0.2 (0.1 to 0.3)                               | 2.8 (1.2 to 4.5)                    |
| Norway                           | 85.5 (81.3 to 88.6)        | 85.6 (81.3 to 89.1)        | 85.8 (81.2 to 89.2)        | 87.6 (83.7 to 90.7)        | 0.2 (0.1 to 0.2)                               | 2.3 (1.3 to 3.5)                    |
| Portugal                         | 74.9 (69.1 to 80.1)        | 80.0 (74.5 to 84.9)        | 80.4 (75.0 to 85.4)        | 84.7 (80.1 to 88.8)        | 0.4 (0.2 to 0.5)                               | 5.8 (3.8 to 8.4)                    |
| Spain                            | 77.4 (72.6 to 81.2)        | 79.7 (74.8 to 84.3)        | 79.7 (74.3 to 84.7)        | 83.2 (78.3 to 87.3)        | 0.3 (0.2 to 0.5)                               | 4.8 (2.5 to 7.3)                    |
| Sweden                           | 79.8 (75.3 to 83.9)        | 81.5 (76.4 to 86.0)        | 81.8 (76.7 to 86.3)        | 83.5 (78.9 to 87.7)        | 0.2 (0.1 to 0.3)                               | 2.5 (0.9 to 4.1)                    |
| Switzerland                      | 83.0 (78.3 to 87.4)        | 85.2 (80.7 to 89.0)        | 85.3 (80.8 to 89.1)        | 86.8 (82.6 to 90.2)        | 0.1 (0.1 to 0.2)                               | 1.9 (0.8 to 3.1)                    |
| United Kingdom                   | 88.3 (87.3 to 89.3)        | 89.3 (86.6 to 91.6)        | 89.5 (86.7 to 91.9)        | 91.3 (88.9 to 93.3)        | 0.1 (0.1 to 0.2)                               | 2.2 (1.4 to 3.0)                    |
| Latin America and Caribbean      |                            |                            |                            |                            |                                                |                                     |
| Andean Latin America             |                            |                            |                            |                            |                                                |                                     |
| Bolivia                          | 36.3 (34.5 to 38.1)        | 48.8 (46.2 to 51.3)        | 51.0 (48.1 to 53.7)        | 63.3 (60.6 to 65.8)        | 1.7 (1.6 to 1.9)                               | 29.6 (26.6 to 32.9)                 |
| Ecuador                          | 62.0 (57.5 to 66.5)        | 71.4 (65.1 to 77.2)        | 72.1 (65.7 to 77.6)        | 79.1 (73.9 to 83.6)        | 0.7 (0.5 to 0.9)                               | 10.8 (7.9 to 13.9)                  |
| Peru                             | 57.7 (56.1 to 59.1)        | 63.5 (61.7 to 65.4)        | 64.5 (61.8 to 67.3)        | 73.1 (70.8 to 75.5)        | 0.9 (0.9 to 1.0)                               | 15.1 (13.7 to 16.5)                 |
| Caribbean                        |                            |                            |                            |                            |                                                |                                     |
| Antigua and Barbuda              | 78.5 (72.3 to 83.6)        | 81.7 (76.4 to 85.7)        | 82.0 (77.0 to 86.2)        | 85.8 (81.1 to 89.2)        | 0.3 (0.2 to 0.5)                               | 5.0 (3.3 to 7.0)                    |
| The Bahamas                      | 84.1 (79.5 to 87.9)        | 85.1 (80.9 to 89.1)        | 85.1 (81.1 to 89.2)        | 88.2 (84.8 to 91.4)        | 0.2 (0.1 to 0.4)                               | 3.7 (2.3 to 5.4)                    |
| Barbados                         | 68.3 (61.7 to 74.0)        | 65.4 (61.2 to 69.3)        | 65.9 (61.3 to 70.5)        | 73.1 (69.0 to 77.1)        | 0.7 (0.6 to 0.9)                               | 11.8 (9.7 to 14.0)                  |
| Belize                           | 67.5 (62.0 to 72.6)        | 69.0 (64.8 to 72.8)        | 69.7 (65.2 to 73.9)        | 78.3 (74.6 to 81.5)        | 0.8 (0.7 to 1.0)                               | 13.4 (11.1 to 15.9)                 |
| Bermuda                          | 86.0 (81.6 to 89.5)        | 87.0 (83.2 to 90.4)        | 87.0 (83.2 to 90.3)        | 89.5 (86.3 to 92.3)        | 0.2 (0.1 to 0.3)                               | 2.9 (1.8 to 4.1)                    |
| Cuba                             | 84.7 (81.2 to 87.8)        | 87.8 (86.0 to 89.4)        | 88.4 (86.3 to 90.1)        | 90.5 (88.3 to 92.0)        | 0.2 (0.2 to 0.2)                               | 3.1 (2.4 to 3.8)                    |
| Dominica                         | 79.5 (73.8 to 84.6)        | 81.8 (77.2 to 86.3)        | 82.1 (77.3 to 86.4)        | 86.9 (83.4 to 90.2)        | 0.4 (0.3 to 0.5)                               | 6.3 (4.4 to 8.5)                    |
| Dominican Republic               | 77.8 (76.3 to 79.3)        | 82.9 (81.3 to 84.5)        | 83.5 (81.2 to 85.4)        | 88.8 (87.2 to 90.2)        | 0.5 (0.4 to 0.5)                               | 7.1 (6.4 to 7.9)                    |
| Grenada                          | 75.4 (69.3 to 81.1)        | 82.0 (71.6 to 83.2)        | 78.7 (72.3 to 83.8)        | 84.4 (77.8 to 87.8)        | 0.4 (0.3 to 0.7)                               | 7.0 (3.8 to 10.9)                   |
| Guyana                           | 55.7 (49.9 to 61.6)        | 55.3 (50.9 to 59.6)        | 55.9 (51.0 to 60.6)        | 62.4 (56.9 to 67.6)        | 0.8 (0.5 to 1.1)                               | 12.8 (7.7 to 17.6)                  |
| Haiti                            | 31.3 (29.1 to 33.8)        | 44.2 (42.3 to 46.3)        | 44.5 (42.1 to 47.2)        | 55.3 (52.9 to 57.8)        | 1.5 (1.3 to 1.6)                               | 24.9 (21.8 to 27.8)                 |
| Jamaica                          | 76.5 (73.8 to 79.1)        | 83.7 (80.2 to 86.9)        | 83.8 (80.0 to 87.1)        | 87.3 (84.3 to 90.3)        | 0.3 (0.2 to 0.4)                               | 4.4 (3.1 to 5.9)                    |
| Puerto Rico                      | 81.7 (78.0 to 85.2)        | 86.7 (82.7 to 90.0)        | 86.8 (82.7 to 90.2)        | 90.7 (87.6 to 93.2)        | 0.3 (0.2 to 0.4)                               | 4.7 (3.2 to 6.3)                    |
| Saint Lucia                      | 64.4 (57.6 to 70.9)        | 66.3 (61.3 to 70.9)        | 66.9 (61.7 to 71.8)        | 73.3 (68.6 to 77.7)        | 0.7 (0.5 to 0.8)                               | 10.6 (8.4 to 13.1)                  |
| Saint Vincent and the Grenadines | 83.6 (78.5 to 87.8)        | 81.6 (76.9 to 86.4)        | 82.0 (76.9 to 86.4)        | 86.2 (81.8 to 89.9)        | 0.4 (0.2 to 0.5)                               | 5.7 (3.7 to 7.9)                    |
| Suriname                         | 62.9 (58.0 to 67.5)        | 64.7 (60.5 to 68.5)        | 65.5 (60.6 to 70.0)        | 68.7 (64.0 to 73.0)        | 0.4 (0.3 to 0.5)                               | 6.2 (4.3 to 8.3)                    |
| Trinidad and Tobago              | 55.0 (49.8 to 60.4)        | 61.0 (56.1 to 65.6)        | 61.3 (55.9 to 66.2)        | 67.6 (62.6 to 72.2)        | 0.7 (0.5 to 0.9)                               | 10.9 (8.1 to 14.1)                  |
| Virgin Islands, U.S.             | 84.9 (80.2 to 88.7)        | 87.0 (83.0 to 90.6)        | 87.0 (83.0 to 90.5)        | 90.3 (86.9 to 93.0)        | 0.2 (0.2 to 0.3)                               | 3.8 (2.4 to 5.4)                    |
| Central Latin America            |                            |                            |                            |                            |                                                |                                     |
| Colombia                         | 74.3 (72.7 to 75.8)        | 85.4 (83.6 to 87.1)        | 86.3 (84.3 to 88.3)        | 91.6 (90.3 to 92.8)        | 0.5 (0.4 to 0.5)                               | 7.2 (6.4 to 8.2)                    |
| Costa Rica                       | 81.4 (77.8 to 84.7)        | 85.4 (82.6 to 87.9)        | 86.0 (83.1 to 88.7)        | 88.7 (86.3 to 91.0)        | 0.3 (0.2 to 0.3)                               | 3.9 (2.9 to 4.9)                    |
| El Salvador                      | 74.8 (72.2 to 77.3)        | 81.3 (77.9 to 84.0)        | 81.3 (77.9 to 84.3)        | 86.7 (84.1 to 89.0)        | 0.4 (0.4 to 0.5)                               | 6.8 (5.6 to 8.2)                    |
| Guatemala                        | 59.9 (56.7 to 63.2)        | 69.8 (66.5 to 73.2)        | 70.0 (66.1 to 73.7)        | 78.8 (75.5 to 81.7)        | 0.8 (0.7 to 0.9)                               | 12.9 (11.0 to 15.0)                 |
| Honduras                         | 64.8 (62.6 to 66.9)        | 77.3 (74.3 to 79.9)        | 78.0 (74.4 to 81.0)        | 84.4 (81.7 to 87.7)        | 0.6 (0.5 to 0.7)                               | 9.2 (8.0 to 10.4)                   |
| Mexico                           | 69.8 (66.0 to 73.5)        | 75.0 (70.9 to 78.3)        | 75.8 (71.4 to 79.4)        | 82.5 (78.9 to 85.3)        | 0.6 (0.5 to 0.8)                               | 10.0 (8.4 to 11.9)                  |
| Nicaragua                        | 77.0 (75.2 to 78.7)        | 86.3 (82.7 to 89.6)        | 86.8 (83.2 to 90.1)        | 91.6 (89.3 to 93.8)        | 0.4 (0.3 to 0.5)                               | 6.2 (4.6 to 8.1)                    |
| Panama                           | 74.8 (69.3 to 79.3)        | 73.4 (70.2 to 76.3)        | 74.5 (71.0 to 77.7)        | 80.4 (77.4 to 83.1)        | 0.6 (0.5 to 0.7)                               | 9.6 (8.0 to 11.4)                   |

|                                               | Estimate in 2000 (95% UIs) | Estimate in 2015 (95% UIs) | Estimate in 2017 (95% UIs) | Estimate in 2020 (95% UIs) | Annualised rate of change, 2015-2020 (95% UIs) | Percent change, 2015-2020 (95% UIs) |
|-----------------------------------------------|----------------------------|----------------------------|----------------------------|----------------------------|------------------------------------------------|-------------------------------------|
| Venezuela                                     | 72.8 (67.3 to 78.0)        | 78.5 (72.9 to 83.4)        | 79.0 (73.2 to 83.9)        | 84.2 (79.5 to 88.2)        | 0.5 (0.3 to 0.6)                               | 7.3 (5.1 to 9.9)                    |
| <b>Tropical Latin America</b>                 |                            |                            |                            |                            |                                                |                                     |
| Brazil                                        | 81.4 (78.8 to 83.7)        | 87.6 (84.4 to 90.5)        | 88.0 (84.5 to 90.9)        | 92.0 (89.5 to 94.0)        | 0.3 (0.2 to 0.4)                               | 5.0 (3.7 to 6.4)                    |
| Paraguay                                      | 65.5 (62.0 to 69.0)        | 78.9 (75.6 to 82.0)        | 79.9 (76.6 to 83.1)        | 86.8 (84.3 to 89.0)        | 0.6 (0.5 to 0.8)                               | 10.1 (8.1 to 12.2)                  |
| <b>North Africa and Middle East</b>           |                            |                            |                            |                            |                                                |                                     |
| <b>North Africa and Middle East</b>           |                            |                            |                            |                            |                                                |                                     |
| Afghanistan                                   | 18.4 (13.8 to 23.5)        | 40.6 (37.4 to 43.6)        | 41.8 (38.1 to 45.3)        | 52.9 (49.2 to 56.5)        | 1.8 (1.5 to 2.0)                               | 30.3 (25.8 to 34.6)                 |
| Algeria                                       | 69.4 (66.0 to 72.5)        | 73.2 (69.7 to 76.5)        | 74.2 (70.3 to 77.8)        | 78.7 (75.3 to 82.0)        | 0.5 (0.4 to 0.6)                               | 7.5 (5.5 to 9.5)                    |
| Bahrain                                       | 55.9 (48.5 to 63.2)        | 65.5 (58.5 to 72.7)        | 66.4 (59.4 to 73.6)        | 74.0 (67.4 to 80.1)        | 0.8 (0.6 to 1.1)                               | 13.0 (9.4 to 17.5)                  |
| Egypt                                         | 77.0 (75.7 to 78.3)        | 82.5 (80.1 to 84.5)        | 83.5 (80.9 to 85.8)        | 88.7 (86.9 to 90.3)        | 0.5 (0.4 to 0.6)                               | 7.6 (6.5 to 8.9)                    |
| Iran                                          | 81.1 (76.9 to 85.5)        | 84.2 (79.2 to 88.2)        | 84.8 (80.3 to 88.6)        | 88.5 (84.5 to 91.5)        | 0.3 (0.1 to 0.5)                               | 5.0 (2.2 to 8.4)                    |
| Iraq                                          | 48.8 (42.9 to 54.4)        | 57.1 (52.9 to 61.4)        | 58.6 (53.5 to 63.7)        | 64.2 (59.4 to 68.9)        | 0.8 (0.7 to 0.9)                               | 12.4 (10.3 to 14.5)                 |
| Jordan                                        | 52.9 (50.6 to 55.3)        | 56.1 (53.6 to 58.7)        | 55.3 (52.6 to 58.2)        | 63.9 (61.4 to 66.6)        | 0.9 (0.7 to 1.0)                               | 13.8 (11.8 to 16.0)                 |
| Kuwait                                        | 59.7 (53.3 to 66.3)        | 71.9 (64.5 to 78.1)        | 72.9 (65.8 to 78.9)        | 80.0 (74.3 to 84.8)        | 0.7 (0.5 to 1.0)                               | 11.3 (7.3 to 16.2)                  |
| Lebanon                                       | 49.0 (44.8 to 53.3)        | 60.6 (54.0 to 66.7)        | 61.9 (54.9 to 67.9)        | 70.5 (64.0 to 71.3)        | 1.0 (0.7 to 1.3)                               | 16.4 (11.0 to 22.2)                 |
| Libya                                         | 42.2 (38.1 to 46.5)        | 57.7 (52.1 to 62.8)        | 57.4 (51.4 to 62.7)        | 63.6 (58.5 to 67.9)        | 0.6 (0.5 to 0.9)                               | 10.2 (7.4 to 13.8)                  |
| Morocco                                       | 68.0 (65.4 to 70.6)        | 69.6 (64.3 to 74.1)        | 70.6 (64.6 to 75.5)        | 78.6 (73.7 to 82.5)        | 0.8 (0.6 to 1.0)                               | 12.9 (10.1 to 15.9)                 |
| Palestine                                     | 53.4 (49.8 to 56.8)        | 62.3 (59.2 to 65.4)        | 63.8 (60.1 to 67.4)        | 70.6 (67.2 to 73.8)        | 0.8 (0.7 to 1.0)                               | 13.3 (11.3 to 15.3)                 |
| Oman                                          | 38.8 (32.8 to 45.5)        | 40.8 (38.9 to 43.4)        | 42.4 (38.9 to 45.9)        | 57.7 (54.0 to 61.3)        | 2.3 (2.1 to 2.6)                               | 41.5 (36.2 to 47.3)                 |
| Qatar                                         | 57.4 (51.2 to 63.4)        | 68.7 (65.4 to 71.7)        | 69.7 (65.9 to 73.2)        | 77.9 (74.9 to 80.8)        | 0.8 (0.7 to 1.0)                               | 13.5 (11.6 to 15.5)                 |
| Saudi Arabia                                  | 47.5 (40.4 to 54.4)        | 42.7 (35.7 to 49.4)        | 43.1 (36.1 to 49.9)        | 57.4 (50.1 to 64.0)        | 2.0 (1.6 to 2.4)                               | 34.6 (27.7 to 42.9)                 |
| Sudan                                         | 18.5 (15.6 to 21.9)        | 27.7 (24.7 to 30.5)        | 29.9 (26.4 to 33.4)        | 39.7 (35.6 to 43.7)        | 2.4 (2.2 to 2.7)                               | 43.3 (38.2 to 48.9)                 |
| Syria                                         | 50.1 (45.5 to 54.4)        | 56.0 (49.5 to 62.2)        | 57.0 (50.5 to 63.4)        | 68.8 (62.9 to 74.3)        | 1.4 (1.1 to 1.6)                               | 23.0 (18.7 to 28.1)                 |
| Tunisia                                       | 69.3 (65.6 to 73.1)        | 70.7 (66.6 to 74.9)        | 71.8 (66.6 to 76.2)        | 77.8 (73.5 to 81.7)        | 0.6 (0.5 to 0.8)                               | 10.2 (7.9 to 12.7)                  |
| Turkey                                        | 53.3 (51.1 to 55.6)        | 59.6 (56.6 to 62.5)        | 61.2 (57.5 to 64.8)        | 72.6 (69.4 to 75.6)        | 1.3 (1.2 to 1.5)                               | 21.9 (19.5 to 24.3)                 |
| United Arab Emirates                          | 55.6 (48.4 to 62.5)        | 70.4 (62.5 to 77.6)        | 70.7 (62.7 to 77.6)        | 79.8 (73.6 to 84.8)        | 0.8 (0.5 to 1.3)                               | 13.5 (7.9 to 20.8)                  |
| Yemen                                         | 21.2 (18.6 to 23.9)        | 43.3 (40.3 to 46.4)        | 43.8 (40.1 to 47.7)        | 58.8 (55.1 to 62.3)        | 2.0 (1.8 to 2.2)                               | 35.7 (32.0 to 39.9)                 |
| <b>South Asia</b>                             |                            |                            |                            |                            |                                                |                                     |
| <b>South Asia</b>                             |                            |                            |                            |                            |                                                |                                     |
| Bangladesh                                    | 65.2 (63.2 to 67.2)        | 75.9 (73.7 to 78.2)        | 77.3 (74.5 to 79.9)        | 83.6 (81.5 to 85.6)        | 0.6 (0.6 to 0.7)                               | 10.1 (8.9 to 11.4)                  |
| Bhutan                                        | 64.7 (59.5 to 69.4)        | 78.9 (75.7 to 81.7)        | 79.9 (76.2 to 83.1)        | 86.8 (84.5 to 89.1)        | 0.6 (0.5 to 0.8)                               | 10.0 (8.3 to 12.0)                  |
| India                                         | 65.0 (62.9 to 67.0)        | 70.4 (67.7 to 73.0)        | 71.4 (68.5 to 74.2)        | 77.2 (74.7 to 79.6)        | 0.6 (0.5 to 0.7)                               | 9.7 (7.8 to 11.8)                   |
| Nepal                                         | 54.0 (51.4 to 56.8)        | 59.8 (57.5 to 62.0)        | 59.8 (57.1 to 62.6)        | 70.4 (68.0 to 72.8)        | 1.1 (1.0 to 1.2)                               | 17.8 (15.9 to 19.9)                 |
| Pakistan                                      | 34.2 (31.3 to 37.3)        | 45.4 (42.7 to 48.2)        | 47.1 (43.5 to 50.6)        | 61.1 (57.7 to 64.4)        | 2.0 (1.8 to 2.1)                               | 34.5 (31.3 to 38.0)                 |
| <b>Southeast Asia, East Asia, and Oceania</b> |                            |                            |                            |                            |                                                |                                     |
| <b>East Asia</b>                              |                            |                            |                            |                            |                                                |                                     |
| China                                         | 92.3 (90.2 to 94.0)        | 95.6 (94.1 to 96.9)        | 95.9 (94.5 to 97.1)        | 97.4 (96.4 to 98.2)        | 0.1 (0.1 to 0.2)                               | 1.9 (1.3 to 2.7)                    |
| North Korea                                   | 66.9 (62.0 to 71.6)        | 77.0 (74.3 to 79.6)        | 79.0 (76.4 to 81.5)        | 81.0 (78.4 to 83.4)        | 0.3 (0.2 to 0.4)                               | 5.2 (3.7 to 6.7)                    |
| Taiwan (Province of China)                    | 95.2 (93.3 to 96.7)        | 95.8 (94.2 to 97.1)        | 95.9 (94.3 to 97.2)        | 97.2 (96.1 to 98.2)        | 0.1 (0.1 to 0.2)                               | 1.5 (0.9 to 2.3)                    |
| <b>Oceania</b>                                |                            |                            |                            |                            |                                                |                                     |
| American Samoa                                | 73.7 (66.6 to 79.7)        | 73.3 (66.6 to 79.4)        | 73.6 (66.8 to 79.6)        | 77.6 (69.0 to 84.5)        | 0.4 (0.1 to 0.8)                               | 5.9 (-0.8 to 12.4)                  |
| Federated States of Micronesia                | 60.0 (51.8 to 68.0)        | 60.3 (52.8 to 68.2)        | 61.0 (52.8 to 68.2)        | 69.5 (61.7 to 76.2)        | 0.9 (0.6 to 1.3)                               | 15.3 (9.3 to 21.7)                  |
| Fiji                                          | 70.9 (64.3 to 77.3)        | 70.8 (64.2 to 77.0)        | 71.8 (65.2 to 77.8)        | 78.7 (73.0 to 83.6)        | 0.7 (0.5 to 0.9)                               | 11.1 (8.0 to 14.9)                  |
| Guam                                          | 82.2 (77.1 to 86.8)        | 81.5 (76.2 to 86.3)        | 81.5 (76.2 to 86.3)        | 85.8 (81.6 to 89.5)        | 0.3 (0.2 to 0.5)                               | 5.3 (3.6 to 7.6)                    |
| Kiribati                                      | 51.3 (45.4 to 57.8)        | 41.9 (36.3 to 48.3)        | 43.3 (37.0 to 49.8)        | 49.9 (43.3 to 56.6)        | 1.2 (0.9 to 1.4)                               | 19.0 (14.4 to 23.8)                 |
| Marshall Islands                              | 73.5 (69.1 to 77.8)        | 80.8 (77.2 to 84.4)        | 81.5 (77.5 to 85.1)        | 85.6 (82.5 to 88.7)        | 0.4 (0.3 to 0.5)                               | 6.0 (4.7 to 7.3)                    |
| Northern Mariana Islands                      | 82.3 (76.0 to 87.1)        | 79.4 (73.7 to 84.2)        | 78.6 (72.4 to 83.9)        | 82.8 (75.0 to 88.7)        | 0.3 (-0.2 to 0.7)                              | 4.3 (-3.0 to 10.5)                  |
| Papua New Guinea                              | 35.4 (31.4 to 39.8)        | 39.5 (33.0 to 46.1)        | 40.7 (33.7 to 47.3)        | 45.6 (38.2 to 52.4)        | 1.0 (0.7 to 1.2)                               | 15.4 (11.5 to 19.5)                 |
| Samoa                                         | 47.7 (41.2 to 54.2)        | 44.1 (37.9 to 51.2)        | 45.1 (38.7 to 52.4)        | 47.9 (41.2 to 55.1)        | 0.5 (0.3 to 0.8)                               | 8.6 (4.2 to 13.1)                   |
| Solomon Islands                               | 50.3 (42.8 to 58.3)        | 57.1 (49.5 to 64.5)        | 58.3 (50.8 to 65.4)        | 63.0 (55.3 to 69.9)        | 0.7 (0.5 to 0.9)                               | 10.4 (7.0 to 14.0)                  |
| Tonga                                         | 39.4 (33.0 to 46.1)        | 39.0 (34.6 to 43.9)        | 40.0 (34.7 to 45.6)        | 47.6 (42.3 to 53.3)        | 1.3 (1.0 to 1.6)                               | 22.2 (17.0 to 27.4)                 |
| Vanuatu                                       | 50.5 (43.9 to 56.9)        | 49.6 (45.1 to 54.6)        | 50.3 (45.2 to 55.6)        | 56.7 (51.8 to 61.8)        | 0.9 (0.7 to 1.1)                               | 14.3 (10.6 to 18.5)                 |
| <b>Southeast Asia</b>                         |                            |                            |                            |                            |                                                |                                     |
| Cambodia                                      | 32.2 (29.8 to 34.5)        | 57.2 (54.4 to 60.0)        | 58.7 (55.0 to 62.2)        | 70.1 (67.0 to 73.0)        | 1.4 (1.2 to 1.5)                               | 22.5 (19.9 to 25.3)                 |
| Indonesia                                     | 76.3 (72.9 to 79.6)        | 77.2 (74.8 to 79.5)        | 77.7 (74.8 to 80.2)        | 82.0 (79.5 to 84.2)        | 0.4 (0.3 to 0.5)                               | 6.2 (4.9 to 7.6)                    |
| Laos                                          | 49.8 (44.0 to 55.4)        | 62.4 (58.2 to 66.9)        | 64.3 (59.5 to 69.3)        | 74.8 (70.8 to 78.9)        | 1.2 (1.0 to 1.4)                               | 19.9 (16.9 to 23.1)                 |
| Malaysia                                      | 62.6 (55.6 to 69.3)        | 75.8 (69.3 to 81.9)        | 76.8 (70.4 to 82.7)        | 84.5 (79.8 to 88.8)        | 0.7 (0.5 to 1.0)                               | 11.5 (8.0 to 15.7)                  |
| Maldives                                      | 46.1 (40.2 to 52.1)        | 52.1 (46.1 to 58.6)        | 54.4 (48.0 to 61.5)        | 67.6 (62.0 to 73.6)        | 1.7 (1.4 to 2.1)                               | 29.8 (23.3 to 36.6)                 |
| Mauritius                                     | 62.4 (55.7 to 68.7)        | 72.8 (66.4 to 78.5)        | 73.5 (67.0 to 79.5)        | 79.0 (73.3 to 84.0)        | 0.6 (0.4 to 0.7)                               | 8.6 (6.2 to 11.3)                   |
| Myanmar                                       | 53.9 (48.1 to 59.5)        | 76.0 (73.7 to 78.4)        | 77.0 (74.4 to 79.5)        | 86.0 (84.2 to 87.6)        | 0.8 (0.7 to 0.9)                               | 13.2 (11.4 to 15.0)                 |
| Philippines                                   | 44.5 (42.2 to 46.8)        | 55.5 (53.2 to 57.9)        | 57.3 (54.5 to 60.1)        | 66.2 (63.7 to 68.7)        | 1.2 (1.0 to 1.3)                               | 19.3 (16.8 to 21.6)                 |
| Sri Lanka                                     | 63.8 (58.6 to 68.7)        | 63.5 (60.6 to 66.0)        | 63.8 (61.0 to 66.5)        | 73.9 (71.6 to 76.0)        | 1.0 (0.9 to 1.2)                               | 16.4 (13.9 to 19.2)                 |
| Seychelles                                    | 71.9 (64.9 to 78.6)        | 77.4 (71.0 to 83.3)        | 78.1 (71.6 to 83.9)        | 83.1 (77.8 to 87.7)        | 0.5 (0.3 to 0.7)                               | 7.5 (4.8 to 10.6)                   |
| Thailand                                      | 84.4 (81.3 to 87.0)        | 89.0 (87.5 to 90.2)        | 89.5 (87.8 to 90.9)        | 92.0 (90.7 to 93.1)        | 0.2 (0.2 to 0.3)                               | 3.5 (2.9 to 4.1)                    |
| Timor-Leste                                   | 37.0 (32.6 to 41.4)        | 46.2 (41.6 to 51.2)        | 45.9 (41.1 to 51.1)        | 55.6 (50.6 to 60.6)        | 1.2 (1.0 to 1.5)                               | 20.4 (16.5 to 24.4)                 |
| Vietnam                                       | 68.1 (65.9 to 70.5)        | 72.9 (70.4 to 75.6)        | 74.7 (71.2 to 77.5)        | 78.7 (75.8 to 81.5)        | 0.5 (0.4 to 0.6)                               | 8.0 (6.4 to 9.5)                    |
| <b>Sub-Saharan Africa</b>                     |                            |                            |                            |                            |                                                |                                     |
| <b>Central Sub-Saharan Africa</b>             |                            |                            |                            |                            |                                                |                                     |
| Angola                                        | 10.8 (8.3 to 13.6)         | 28.5 (25.3 to 31.6)        | 30.4 (27.1 to 34.2)        | 43.0 (39.0 to 47.1)        | 2.8 (2.5 to 3.1)                               | 51.3 (44.4 to 58.5)                 |
| Central African Republic                      | 14.4 (12.5 to 16.8)        | 21.0 (17.7 to 24.3)        | 21.5 (17.7 to 25.4)        | 27.4 (23.0 to 31.8)        | 1.8 (1.5 to 2.0)                               | 30.1 (24.9 to 35.5)                 |
| Congo                                         | 22.9 (19.0 to 26.9)        | 40.2 (36.7 to 43.6)        | 41.8 (37.5 to 45.7)        | 53.5 (49.0 to 57.5)        | 1.9 (1.7 to 2.1)                               | 32.9 (28.9 to 36.9)                 |
| Democratic Republic of the Congo              | 11.3 (9.2 to 13.8)         | 20.0 (17.7 to 22.6)        | 21.6 (18.5 to 25.0)        | 28.3 (24.6 to 32.3)        | 2.3 (2.0 to 2.6)                               | 41.2 (35.1 to 47.6)                 |
| Equatorial Guinea                             | 12.9 (9.8 to 16.5)         | 31.5 (25.1 to 38.1)        | 33.0 (26.5 to 39.9)        | 47.1 (39.5 to 54.7)        | 2.7 (2.2 to 3.1)                               | 50.1 (39.9 to 60.3)                 |
| Gabon                                         | 25.7 (23.5 to 28.1)        | 46.0 (42.2 to 49.7)        | 47.8 (43.0 to 52.2)        | 58.9 (54.5 to 63.3)        | 1.7 (1.5 to 1.8)                               | 28.3 (24.5 to 32.0)                 |
| <b>Eastern Sub-Saharan Africa</b>             |                            |                            |                            |                            |                                                |                                     |
| Burundi                                       | 20.4 (16.4 to 24.4)        | 37.2 (33.3 to 41.0)        | 38.1 (33.8 to 42.2)        | 51.0 (46.7 to 55.1)        | 2.1 (1.8 to 2.4)                               | 37.1 (31.1 to 43.2)                 |
| Comoros                                       | 25.9 (22.4 to 29.2)        | 30.8 (27.0 to 34.8)        | 32.5 (28.1 to 37.3)        | 39.1 (34.3 to 43.9)        | 1.6 (1.3 to 1.8)                               | 27.0 (22.3 to 31.8)                 |
| Djibouti                                      | 25.6 (20.8 to 31.2)        | 49.3 (43.8 to 54.9)        | 50.9 (44.9 to 56.8)        | 60.2 (54.4 to 65.6)        | 1.3 (1.0 to 1.6)                               | 22.1 (16.8 to 27.8)                 |
| Eritrea                                       | 14.5 (12.8 to 16.4)        | 27.4 (22.1 to 34.1)        | 29.2 (23.2 to 35.9)        | 40.2 (33.2 to 47.7)        | 2.6 (2.0 to 3.1)                               | 47.1 (35.7 to 58.9)                 |
| Ethiopia                                      | 21.0 (17.9 to 24.3)        | 57.0 (54.8 to 59.0)        | 59.9 (57.4 to 62.3)        | 70.7 (68.5 to 72.8)        | 1.4 (1.3 to 1.6)                               | 24.1 (21.5 to 26.7)                 |

|                                                                                   | Estimate in 2000 (95% UIs) | Estimate in 2015 (95% UIs) | Estimate in 2017 (95% UIs) | Estimate in 2020 (95% UIs) | Annualised rate of change, 2015-2020 (95% UIs) | Percent change, 2015-2020 (95% UIs) |
|-----------------------------------------------------------------------------------|----------------------------|----------------------------|----------------------------|----------------------------|------------------------------------------------|-------------------------------------|
| Kenya                                                                             | 46.1 (43.3 to 49.3)        | 71.0 (68.9 to 73.1)        | 72.8 (70.3 to 75.2)        | 82.8 (81.1 to 84.6)        | 1.0 (0.9 to 1.1)                               | 16.7 (15.0 to 18.5)                 |
| Madagascar                                                                        | 27.6 (24.0 to 31.7)        | 41.4 (35.5 to 47.7)        | 42.0 (35.5 to 48.7)        | 54.0 (47.2 to 60.6)        | 1.8 (1.5 to 2.1)                               | 20.7 (25.5 to 36.1)                 |
| Malawi                                                                            | 40.1 (36.5 to 43.9)        | 70.0 (66.6 to 73.3)        | 71.1 (67.6 to 74.7)        | 82.0 (79.5 to 84.5)        | 1.1 (0.9 to 1.2)                               | 17.1 (14.7 to 19.7)                 |
| Mozambique                                                                        | 24.8 (21.3 to 28.2)        | 44.9 (40.7 to 49.4)        | 47.2 (42.1 to 52.3)        | 58.9 (54.0 to 63.8)        | 1.8 (1.6 to 2.0)                               | 31.0 (26.6 to 35.5)                 |
| Rwanda                                                                            | 21.1 (17.5 to 25.2)        | 54.5 (48.6 to 60.1)        | 55.8 (49.5 to 61.8)        | 65.3 (59.5 to 70.5)        | 1.2 (0.9 to 1.5)                               | 19.9 (14.4 to 25.8)                 |
| Somalia                                                                           | 2.1 (1.5 to 2.8)           | 3.7 (2.6 to 5.0)           | 3.9 (2.8 to 5.3)           | 5.7 (4.0 to 7.8)           | 2.9 (2.4 to 3.4)                               | 54.7 (43.6 to 66.6)                 |
| South Sudan                                                                       | 3.8 (2.7 to 5.4)           | 5.5 (3.9 to 7.4)           | 5.8 (4.1 to 7.8)           | 7.1 (5.1 to 9.4)           | 1.7 (1.1 to 2.3)                               | 29.0 (18.5 to 42.1)                 |
| Tanzania                                                                          | 37.0 (34.1 to 40.0)        | 46.7 (43.4 to 50.1)        | 47.7 (43.9 to 51.6)        | 62.2 (58.6 to 65.8)        | 1.9 (1.7 to 2.1)                               | 33.2 (29.6 to 37.2)                 |
| Uganda                                                                            | 26.8 (24.3 to 29.5)        | 46.6 (45.1 to 48.3)        | 48.8 (46.9 to 50.8)        | 64.3 (62.9 to 66.1)        | 2.1 (2.0 to 2.3)                               | 38.0 (34.8 to 41.0)                 |
| Zambia                                                                            | 34.9 (31.9 to 38.0)        | 60.1 (55.4 to 64.6)        | 61.7 (56.7 to 66.4)        | 74.0 (69.8 to 77.8)        | 1.4 (1.2 to 1.6)                               | 23.3 (19.7 to 27.0)                 |
| <b>Southern Sub-Saharan Africa</b>                                                |                            |                            |                            |                            |                                                |                                     |
| Botswana                                                                          | 71.1 (65.2 to 76.1)        | 79.8 (74.2 to 84.5)        | 80.4 (75.0 to 85.2)        | 86.8 (82.8 to 90.3)        | 0.6 (0.4 to 0.8)                               | 8.9 (5.8 to 12.5)                   |
| Lesotho                                                                           | 54.3 (49.6 to 58.6)        | 76.3 (72.8 to 79.5)        | 77.4 (73.5 to 80.9)        | 85.0 (82.2 to 87.5)        | 0.7 (0.6 to 0.9)                               | 11.5 (9.3 to 13.9)                  |
| Namibia                                                                           | 69.0 (66.5 to 71.2)        | 81.5 (79.1 to 83.8)        | 82.2 (79.3 to 84.8)        | 89.1 (87.2 to 90.8)        | 0.6 (0.5 to 0.7)                               | 9.3 (8.1 to 10.7)                   |
| South Africa                                                                      | 79.3 (77.6 to 81.2)        | 77.5 (75.4 to 79.7)        | 77.7 (75.4 to 79.7)        | 83.1 (81.3 to 84.7)        | 0.5 (0.4 to 0.6)                               | 7.2 (5.6 to 8.8)                    |
| Swaziland                                                                         | 59.8 (54.7 to 64.5)        | 81.1 (78.1 to 84.1)        | 81.8 (78.5 to 85.0)        | 87.4 (84.8 to 89.6)        | 0.5 (0.4 to 0.6)                               | 7.7 (5.8 to 9.9)                    |
| Zimbabwe                                                                          | 72.1 (69.6 to 74.3)        | 83.4 (81.3 to 85.2)        | 84.2 (81.9 to 86.3)        | 89.7 (88.1 to 91.0)        | 0.5 (0.4 to 0.6)                               | 7.6 (6.4 to 9.0)                    |
| <b>Western Sub-Saharan Africa</b>                                                 |                            |                            |                            |                            |                                                |                                     |
| Benin                                                                             | 13.9 (12.5 to 15.4)        | 24.1 (21.2 to 27.2)        | 25.3 (21.9 to 29.4)        | 34.7 (30.4 to 39.5)        | 2.4 (2.2 to 2.7)                               | 44.1 (38.1 to 49.8)                 |
| Burkina Faso                                                                      | 21.9 (19.2 to 25.1)        | 41.2 (38.6 to 43.7)        | 42.9 (39.9 to 45.8)        | 57.7 (54.9 to 60.4)        | 2.2 (2.1 to 2.5)                               | 40.1 (36.2 to 44.7)                 |
| Cameroon                                                                          | 23.7 (21.4 to 25.9)        | 43.1 (40.0 to 46.3)        | 44.7 (40.6 to 48.7)        | 57.0 (53.0 to 60.8)        | 1.9 (1.6 to 2.1)                               | 32.1 (28.0 to 36.6)                 |
| Cape Verde                                                                        | 54.9 (49.2 to 60.5)        | 69.6 (62.8 to 75.7)        | 70.3 (63.2 to 76.4)        | 76.5 (68.0 to 80.3)        | 0.5 (0.2 to 0.7)                               | 7.1 (3.6 to 11.2)                   |
| Chad                                                                              | 6.9 (5.6 to 8.6)           | 14.7 (12.7 to 17.0)        | 15.8 (13.3 to 18.4)        | 22.7 (19.4 to 26.1)        | 2.9 (2.5 to 3.3)                               | 54.6 (45.9 to 62.9)                 |
| Cote d'Ivoire                                                                     | 21.8 (19.5 to 24.1)        | 33.7 (31.8 to 35.7)        | 35.5 (33.3 to 37.7)        | 47.1 (44.7 to 49.6)        | 2.2 (2.0 to 2.5)                               | 40.0 (35.5 to 44.6)                 |
| The Gambia                                                                        | 21.9 (17.9 to 26.4)        | 29.8 (26.7 to 33.2)        | 30.7 (26.8 to 35.0)        | 39.4 (35.0 to 44.1)        | 1.9 (1.6 to 2.1)                               | 32.2 (27.5 to 36.8)                 |
| Ghana                                                                             | 30.0 (25.3 to 35.1)        | 40.5 (36.2 to 44.6)        | 42.6 (37.8 to 47.2)        | 56.4 (51.9 to 60.9)        | 2.2 (2.0 to 2.5)                               | 39.2 (34.0 to 44.6)                 |
| Guinea                                                                            | 15.7 (13.6 to 17.7)        | 20.8 (18.4 to 23.3)        | 21.3 (18.6 to 24.1)        | 29.9 (26.4 to 33.4)        | 2.4 (2.1 to 2.8)                               | 44.1 (37.0 to 52.3)                 |
| Guinea-Bissau                                                                     | 19.3 (14.9 to 24.3)        | 48.1 (41.2 to 54.9)        | 49.0 (41.7 to 55.7)        | 61.8 (55.0 to 67.7)        | 1.7 (1.3 to 2.0)                               | 28.7 (22.2 to 35.7)                 |
| Liberia                                                                           | 17.9 (14.8 to 21.0)        | 43.7 (40.5 to 47.1)        | 45.8 (42.0 to 50.2)        | 60.0 (56.2 to 64.3)        | 2.1 (1.9 to 2.3)                               | 37.5 (33.7 to 41.4)                 |
| Mali                                                                              | 15.8 (14.0 to 17.6)        | 30.9 (28.6 to 33.0)        | 32.5 (29.4 to 35.3)        | 46.3 (42.7 to 49.5)        | 2.7 (2.5 to 2.9)                               | 50.0 (45.1 to 54.6)                 |
| Mauritania                                                                        | 13.1 (11.0 to 15.5)        | 27.8 (25.0 to 30.8)        | 29.5 (26.2 to 32.8)        | 35.9 (32.2 to 39.7)        | 1.7 (1.4 to 2.0)                               | 29.3 (24.0 to 34.5)                 |
| Niger                                                                             | 19.3 (16.4 to 22.3)        | 37.4 (33.9 to 41.0)        | 41.6 (37.7 to 45.6)        | 56.5 (52.2 to 60.7)        | 2.8 (2.5 to 3.0)                               | 51.4 (45.2 to 57.4)                 |
| Nigeria                                                                           | 23.4 (20.1 to 26.9)        | 37.2 (34.4 to 40.2)        | 39.2 (35.7 to 42.6)        | 51.0 (47.4 to 54.4)        | 2.1 (1.9 to 2.3)                               | 37.0 (32.5 to 41.8)                 |
| Sao Tome and Principe                                                             | 47.5 (41.6 to 53.6)        | 55.7 (50.5 to 60.9)        | 57.1 (51.3 to 62.6)        | 66.5 (61.1 to 71.4)        | 1.2 (1.0 to 1.4)                               | 19.4 (15.8 to 23.1)                 |
| Senegal                                                                           | 17.9 (15.9 to 19.8)        | 44.6 (43.0 to 46.2)        | 48.5 (46.5 to 50.8)        | 64.4 (63.5 to 66.5)        | 2.5 (2.3 to 2.6)                               | 44.6 (41.5 to 47.8)                 |
| Sierra Leone                                                                      | 16.6 (13.6 to 20.3)        | 41.3 (36.9 to 46.1)        | 42.8 (37.9 to 48.2)        | 55.5 (50.2 to 60.7)        | 2.0 (1.7 to 2.2)                               | 34.5 (30.0 to 39.3)                 |
| Togo                                                                              | 23.6 (20.5 to 26.8)        | 37.5 (34.2 to 41.0)        | 39.4 (35.3 to 44.0)        | 52.8 (48.5 to 57.6)        | 2.3 (2.1 to 2.5)                               | 41.1 (36.1 to 45.9)                 |
| <b>Indicator 3.7.2: Number of livebirths per 1,000 women aged 10-19 years old</b> |                            |                            |                            |                            |                                                |                                     |
| <b>Central Europe, Eastern Europe, and Central Asia</b>                           |                            |                            |                            |                            |                                                |                                     |
| <b>Central Asia</b>                                                               |                            |                            |                            |                            |                                                |                                     |
| Armenia                                                                           | 14.9 (13.7 to 16.2)        | 12.7 (11.0 to 14.5)        | 12.1 (10.4 to 14.1)        | 8.6 (6.1 to 11.9)          | -2.7 (-4.6 to -0.6)                            | -32.5 (-50.1 to -8.0)               |
| Azerbaijan                                                                        | 15.5 (13.5 to 17.8)        | 24.2 (20.7 to 28.4)        | 22.6 (18.5 to 25.7)        | 16.6 (18.5 to 21.6)        | -2.6 (-4.5 to -0.8)                            | -31.5 (-48.9 to -11.0)              |
| Georgia                                                                           | 17.7 (15.2 to 20.4)        | 24.6 (20.9 to 28.6)        | 23.1 (19.6 to 27.2)        | 17.3 (12.4 to 23.1)        | -3.4 (-4.3 to -0.5)                            | -29.5 (-47.9 to -7.2)               |
| Kazakhstan                                                                        | 13.2 (12.5 to 14.0)        | 16.0 (14.3 to 17.8)        | 14.2 (12.4 to 16.1)        | 10.2 (7.4 to 13.8)         | -5.0 (-5.0 to -1.0)                            | -35.9 (-52.8 to -14.1)              |
| Kyrgyzstan                                                                        | 17.1 (15.3 to 19.0)        | 20.4 (17.7 to 23.3)        | 18.8 (16.0 to 22.0)        | 13.2 (9.2 to 18.1)         | -3.0 (-5.1 to -1.0)                            | -35.5 (-53.5 to -13.9)              |
| Mongolia                                                                          | 13.4 (12.6 to 14.4)        | 13.5 (12.2 to 15.1)        | 13.2 (11.6 to 15.0)        | 9.4 (6.8 to 13.0)          | -2.5 (-4.5 to -0.4)                            | -30.2 (-48.9 to -6.5)               |
| Tajikistan                                                                        | 27.6 (24.4 to 31.0)        | 27.7 (23.6 to 32.4)        | 27.5 (23.3 to 32.3)        | 17.6 (12.7 to 23.8)        | -3.1 (-5.0 to -1.1)                            | -36.2 (-52.5 to -15.1)              |
| Turkmenistan                                                                      | 7.8 (7.1 to 8.7)           | 9.3 (8.1 to 10.8)          | 9.3 (8.0 to 10.9)          | 6.2 (4.4 to 8.7)           | -2.8 (-4.7 to -0.6)                            | -33.1 (-50.4 to -9.2)               |
| Uzbekistan                                                                        | 15.8 (14.1 to 17.8)        | 16.5 (14.2 to 19.2)        | 16.1 (13.7 to 19.0)        | 9.0 (6.4 to 12.2)          | -4.1 (-6.3 to -2.2)                            | -45.5 (-60.9 to -27.8)              |
| <b>Central Europe</b>                                                             |                            |                            |                            |                            |                                                |                                     |
| Albania                                                                           | 12.1 (10.8 to 13.4)        | 11.0 (9.8 to 12.9)         | 10.6 (8.9 to 12.7)         | 6.2 (4.0 to 9.4)           | -3.9 (-6.7 to -1.1)                            | -43.1 (-63.3 to -15.5)              |
| Bosnia and Herzegovina                                                            | 10.0 (9.2 to 10.8)         | 5.6 (4.9 to 5.9)           | 5.4 (4.7 to 6.3)           | 3.7 (2.4 to 5.7)           | -2.9 (-5.8 to 0.1)                             | -34.1 (-57.9 to 1.6)                |
| Bulgaria                                                                          | 23.3 (22.3 to 24.5)        | 20.4 (18.5 to 22.4)        | 19.7 (17.1 to 22.6)        | 16.8 (10.8 to 24.6)        | -1.4 (-4.2 to 1.2)                             | -17.8 (-47.0 to 20.5)               |
| Croatia                                                                           | 7.3 (6.7 to 8.1)           | 5.3 (4.7 to 6.1)           | 5.2 (4.5 to 6.1)           | 4.2 (2.7 to 6.2)           | -1.6 (-4.4 to 1.0)                             | -20.0 (-48.2 to 16.2)               |
| Czech Republic                                                                    | 6.6 (5.9 to 7.2)           | 6.0 (5.2 to 6.9)           | 5.9 (5.0 to 7.0)           | 5.0 (3.1 to 7.9)           | -1.4 (-4.3 to 1.6)                             | -16.6 (-47.8 to 26.9)               |
| Hungary                                                                           | 11.6 (10.8 to 12.4)        | 11.8 (10.6 to 13.0)        | 11.0 (9.5 to 12.8)         | 9.4 (5.9 to 14.6)          | -1.6 (-4.5 to 1.3)                             | -19.7 (-49.5 to 21.2)               |
| Macedonia                                                                         | 14.1 (13.1 to 15.3)        | 8.7 (7.6 to 10.0)          | 8.6 (7.3 to 9.9)           | 6.9 (4.3 to 10.3)          | -1.8 (-4.6 to 1.0)                             | -21.2 (-49.5 to 16.8)               |
| Montenegro                                                                        | 11.4 (10.1 to 13.0)        | 5.9 (5.0 to 6.9)           | 5.9 (5.0 to 7.0)           | 5.0 (3.1 to 8.0)           | -1.2 (-3.9 to 1.8)                             | -14.0 (-44.7 to 31.0)               |
| Poland                                                                            | 8.6 (8.2 to 9.1)           | 6.7 (6.0 to 7.4)           | 6.5 (5.5 to 7.6)           | 5.1 (3.2 to 7.7)           | -2.0 (-4.9 to 1.0)                             | -23.5 (-51.7 to 15.7)               |
| Romania                                                                           | 18.0 (17.4 to 18.7)        | 18.0 (16.8 to 19.4)        | 17.5 (15.3 to 20.3)        | 13.0 (8.3 to 19.7)         | -2.3 (-5.2 to 0.6)                             | -27.8 (-53.9 to 10.1)               |
| Serbia                                                                            | 13.9 (13.1 to 14.8)        | 7.5 (6.7 to 8.4)           | 7.5 (6.7 to 9.1)           | 6.5 (4.1 to 9.6)           | -1.1 (-4.1 to 1.7)                             | -13.7 (-45.8 to 29.0)               |
| Slovakia                                                                          | 11.1 (10.3 to 12.0)        | 12.4 (11.2 to 13.6)        | 11.8 (10.3 to 13.5)        | 9.8 (6.2 to 14.7)          | -1.7 (-4.6 to 1.2)                             | -20.7 (-50.0 to 19.1)               |
| Slovenia                                                                          | 3.4 (2.9 to 4.0)           | 2.5 (2.1 to 3.0)           | 2.5 (2.1 to 3.0)           | 2.4 (1.6 to 3.7)           | -0.5 (-3.2 to 2.4)                             | -5.0 (-38.3 to 44.0)                |
| <b>Eastern Europe</b>                                                             |                            |                            |                            |                            |                                                |                                     |
| Belarus                                                                           | 11.5 (10.6 to 12.6)        | 9.8 (8.6 to 11.1)          | 9.3 (8.1 to 10.9)          | 5.2 (4.1 to 6.6)           | -4.3 (-5.7 to -2.8)                            | -47.0 (-57.4 to -33.9)              |
| Estonia                                                                           | 11.1 (9.8 to 12.4)         | 6.7 (5.6 to 7.8)           | 6.7 (5.6 to 8.0)           | 6.5 (4.9 to 8.3)           | -0.2 (-1.8 to 1.4)                             | -2.4 (-23.4 to 23.8)                |
| Latvia                                                                            | 8.2 (7.3 to 9.2)           | 9.2 (8.0 to 10.6)          | 8.9 (7.6 to 10.5)          | 8.0 (6.1 to 10.3)          | -1.0 (-2.6 to 0.6)                             | -13.3 (-32.1 to 9.3)                |
| Lithuania                                                                         | 9.5 (8.7 to 10.4)          | 8.2 (7.2 to 9.3)           | 8.6 (7.4 to 10.0)          | 7.0 (5.5 to 8.8)           | -1.1 (-2.6 to 0.6)                             | -14.0 (-32.3 to 8.6)                |
| Moldova                                                                           | 18.6 (17.1 to 20.2)        | 12.2 (10.7 to 13.9)        | 11.7 (10.1 to 13.5)        | 7.4 (5.6 to 9.5)           | -3.4 (-4.9 to -2.0)                            | -39.4 (-51.8 to -25.5)              |
| Russia                                                                            | 13.6 (13.3 to 14.0)        | 12.6 (11.5 to 13.7)        | 12.1 (10.4 to 14.1)        | 8.5 (6.6 to 10.9)          | -2.6 (-4.2 to -1.1)                            | -32.3 (-46.9 to -14.7)              |
| Ukraine                                                                           | 15.5 (14.4 to 16.6)        | 14.0 (12.2 to 15.8)        | 13.1 (11.4 to 15.1)        | 8.1 (6.2 to 10.1)          | -3.7 (-5.2 to -2.2)                            | -42.3 (-54.5 to -28.4)              |
| <b>High-income</b>                                                                |                            |                            |                            |                            |                                                |                                     |
| <b>Australasia</b>                                                                |                            |                            |                            |                            |                                                |                                     |
| Australia                                                                         | 8.8 (8.1 to 9.5)           | 6.7 (6.0 to 7.5)           | 6.7 (5.7 to 7.8)           | 5.4 (4.3 to 6.7)           | -1.4 (-2.7 to -0.2)                            | -18.8 (-33.1 to -2.4)               |
| New Zealand                                                                       | 13.7 (12.2 to 15.3)        | 10.2 (9.0 to 11.6)         | 10.4 (8.9 to 12.2)         | 7.8 (6.3 to 9.7)           | -1.8 (-3.1 to -0.5)                            | -23.3 (-37.5 to -7.3)               |
| <b>High-income Asia Pacific</b>                                                   |                            |                            |                            |                            |                                                |                                     |
| Brunei                                                                            | 12.2 (10.4 to 14.3)        | 6.5 (5.4 to 7.7)           | 6.5 (5.4 to 7.8)           | 5.5 (2.0 to 11.5)          | -1.7 (-7.6 to 3.7)                             | -15.5 (-67.9 to 75.4)               |
| Japan                                                                             | 2.8 (2.4 to 3.2)           | 2.1 (1.7 to 2.5)           | 2.1 (1.8 to 2.6)           | 2.1 (0.8 to 4.6)           | -0.7 (-6.0 to 5.2)                             | -40.3 (-59.5 to 119.7)              |
| South Korea                                                                       | 2.0 (1.7 to 2.3)           | 0.9 (0.8 to 1.1)           | 1.0 (0.8 to 1.2)           | 0.8 (0.4 to 1.2)           | -1.6 (-5.4 to 2.9)                             | -16.7 (-55.3 to 55.0)               |
| Singapore                                                                         | 3.9 (3.3 to 4.7)           | 2.6 (2.2 to 3.1)           | 2.7 (2.2 to 3.3)           | 2.2 (1.0 to 4.7)           | -1.6 (-6.5 to 3.8)                             | -14.8 (-62.5 to 77.0)               |



|                                     | Estimate in 2000 (95% UIs) | Estimate in 2015 (95% UIs) | Estimate in 2017 (95% UIs) | Estimate in 2030 (95% UIs) | Annualised rate of change, 2015-2030 (95% UIs) | Percent change, 2015-2030 (95% UIs) |
|-------------------------------------|----------------------------|----------------------------|----------------------------|----------------------------|------------------------------------------------|-------------------------------------|
| <b>High-income North America</b>    |                            |                            |                            |                            |                                                |                                     |
| Canada                              | 8.4 (7.9 to 8.9)           | 6.5 (5.6 to 7.6)           | 6.5 (5.5 to 7.8)           | 5.5 (4.3 to 6.8)           | -1.2 (-2.8 to 0.1)                             | -16.1 (-34.5 to 1.7)                |
| Greenland                           | 26.2 (22.3 to 30.6)        | 21.3 (18.1 to 24.9)        | 21.3 (18.0 to 25.4)        | 16.6 (12.8 to 20.9)        | -1.7 (-3.2 to -0.2)                            | -22.1 (-37.8 to -3.6)               |
| United States                       | 23.5 (23.1 to 24.0)        | 10.9 (10.6 to 11.2)        | 11.0 (10.0 to 12.0)        | 8.7 (7.1 to 10.5)          | -1.6 (-2.8 to -0.3)                            | -20.3 (-34.3 to -3.7)               |
| <b>Southern Latin America</b>       |                            |                            |                            |                            |                                                |                                     |
| Argentina                           | 31.6 (30.5 to 32.9)        | 31.3 (30.2 to 32.7)        | 30.6 (27.3 to 34.4)        | 24.7 (20.1 to 29.7)        | -1.6 (-2.9 to -0.5)                            | -21.2 (-35.6 to -6.6)               |
| Chile                               | 29.9 (29.0 to 31.0)        | 21.8 (20.4 to 23.2)        | 21.8 (19.2 to 24.8)        | 17.3 (14.0 to 20.9)        | -1.6 (-2.9 to -0.4)                            | -20.7 (-35.1 to -5.3)               |
| Uruguay                             | 31.3 (29.5 to 33.1)        | 29.5 (27.3 to 31.9)        | 28.3 (24.7 to 32.3)        | 22.8 (18.7 to 27.7)        | -1.7 (-2.9 to -0.6)                            | -22.6 (-35.7 to -8.3)               |
| <b>Western Europe</b>               |                            |                            |                            |                            |                                                |                                     |
| Andorra                             | 3.8 (3.2 to 4.4)           | 2.5 (2.2 to 2.9)           | 2.6 (2.3 to 3.0)           | 2.3 (1.6 to 3.2)           | -0.7 (-2.7 to 1.6)                             | -9.3 (-33.6 to 27.4)                |
| Austria                             | 7.0 (6.2 to 7.9)           | 4.6 (4.0 to 5.2)           | 4.7 (4.0 to 5.5)           | 3.6 (2.4 to 5.2)           | -1.7 (-4.2 to 0.8)                             | -20.9 (-47.1 to 12.4)               |
| Belgium                             | 5.5 (4.9 to 6.2)           | 3.7 (3.1 to 4.4)           | 3.8 (3.2 to 4.6)           | 3.4 (2.2 to 4.9)           | -0.8 (-3.2 to 1.8)                             | -9.5 (-38.1 to 31.1)                |
| Cyprus                              | 5.1 (4.2 to 6.1)           | 2.0 (1.6 to 2.4)           | 2.1 (1.7 to 2.5)           | 1.7 (1.2 to 2.5)           | -1.1 (-3.5 to 1.3)                             | -13.8 (-41.2 to 21.7)               |
| Denmark                             | 3.5 (3.0 to 4.2)           | 2.3 (1.9 to 2.7)           | 2.4 (2.0 to 2.9)           | 2.0 (1.4 to 2.9)           | -0.9 (-3.2 to 1.6)                             | -11.0 (-38.2 to 27.6)               |
| Finland                             | 4.2 (3.7 to 4.8)           | 3.5 (3.0 to 4.2)           | 3.5 (2.9 to 4.1)           | 3.1 (2.1 to 4.6)           | -1.0 (-3.5 to 1.8)                             | -11.6 (-40.8 to 31.3)               |
| France                              | 4.9 (4.6 to 5.2)           | 3.8 (3.4 to 4.2)           | 3.8 (3.3 to 4.4)           | 3.4 (2.3 to 5.1)           | -0.9 (-3.2 to 1.9)                             | -10.5 (-38.2 to 32.0)               |
| Germany                             | 7.2 (6.8 to 7.6)           | 4.0 (3.6 to 4.4)           | 4.2 (3.6 to 4.8)           | 3.2 (2.2 to 4.8)           | -1.4 (-4.0 to 1.2)                             | -18.0 (-44.8 to 19.5)               |
| Greece                              | 5.6 (5.0 to 6.2)           | 4.5 (3.9 to 5.0)           | 4.6 (4.0 to 5.3)           | 3.8 (2.5 to 5.4)           | -1.2 (-3.7 to 1.3)                             | -15.1 (-42.7 to 21.6)               |
| Iceland                             | 10.4 (8.8 to 12.3)         | 4.7 (4.0 to 5.5)           | 4.9 (4.1 to 5.7)           | 4.2 (2.8 to 5.7)           | -0.9 (-3.4 to 1.8)                             | -11.3 (-40.1 to 30.3)               |
| Ireland                             | 9.9 (9.0 to 11.0)          | 5.0 (4.4 to 5.6)           | 5.2 (4.5 to 6.1)           | 4.9 (3.2 to 7.1)           | -0.2 (-2.8 to 2.3)                             | -1.1 (-34.5 to 41.8)                |
| Israel                              | 8.2 (7.5 to 9.0)           | 5.3 (4.6 to 6.0)           | 5.3 (4.6 to 6.5)           | 4.9 (3.2 to 7.2)           | -0.7 (-3.4 to 2.0)                             | -7.6 (-39.8 to 35.4)                |
| Italy                               | 3.6 (3.2 to 3.9)           | 2.8 (2.4 to 3.1)           | 2.8 (2.4 to 3.3)           | 2.5 (1.7 to 3.6)           | -0.8 (-3.3 to 1.6)                             | -9.0 (-38.6 to 27.5)                |
| Luxembourg                          | 4.8 (4.0 to 5.7)           | 3.1 (2.5 to 3.7)           | 3.2 (2.7 to 3.9)           | 2.8 (1.8 to 4.1)           | -0.9 (-3.5 to 1.6)                             | -11.1 (-41.2 to 26.8)               |
| Malta                               | 8.2 (7.4 to 9.1)           | 6.8 (6.2 to 7.5)           | 6.7 (5.8 to 7.7)           | 5.0 (3.3 to 7.2)           | -2.2 (-4.8 to 0.3)                             | -27.0 (-51.7 to 5.4)                |
| Netherlands                         | 3.1 (2.7 to 3.5)           | 2.0 (1.7 to 2.4)           | 2.1 (1.8 to 2.5)           | 1.9 (1.3 to 2.8)           | -0.3 (-2.7 to 2.1)                             | -2.0 (-33.1 to 36.6)                |
| Norway                              | 5.2 (4.5 to 6.0)           | 2.8 (2.3 to 3.3)           | 2.9 (2.4 to 3.5)           | 2.5 (1.6 to 3.5)           | -0.9 (-3.5 to 1.6)                             | -10.5 (-41.3 to 27.8)               |
| Portugal                            | 11.0 (10.2 to 11.9)        | 5.0 (4.3 to 5.7)           | 5.4 (4.6 to 6.3)           | 4.2 (2.9 to 6.2)           | -1.2 (-3.7 to 1.3)                             | -15.3 (-42.7 to 21.6)               |
| Spain                               | 4.9 (4.5 to 5.4)           | 3.9 (3.4 to 4.5)           | 4.0 (3.4 to 4.7)           | 3.7 (2.5 to 5.4)           | -0.5 (-3.0 to 3.3)                             | -5.3 (-36.3 to 35.3)                |
| Sweden                              | 3.0 (2.5 to 3.5)           | 2.5 (2.1 to 3.0)           | 2.5 (2.1 to 3.0)           | 2.1 (1.4 to 3.0)           | -1.2 (-3.7 to 1.2)                             | -15.2 (-42.5 to 19.5)               |
| Switzerland                         | 2.6 (2.2 to 3.1)           | 1.7 (1.4 to 2.1)           | 1.8 (1.4 to 2.1)           | 1.4 (1.0 to 1.9)           | -1.3 (-3.6 to 1.2)                             | -16.3 (-41.5 to 19.1)               |
| United Kingdom                      | 13.5 (13.0 to 14.0)        | 7.5 (7.1 to 8.1)           | 7.7 (6.8 to 8.7)           | 6.1 (4.0 to 8.7)           | -1.5 (-4.2 to 1.0)                             | -18.8 (-46.5 to 15.9)               |
| <b>Latin America and Caribbean</b>  |                            |                            |                            |                            |                                                |                                     |
| <b>Andean Latin America</b>         |                            |                            |                            |                            |                                                |                                     |
| Bolivia                             | 41.6 (36.8 to 46.7)        | 39.5 (34.7 to 45.0)        | 37.6 (32.4 to 43.5)        | 24.4 (19.0 to 31.0)        | -3.2 (-4.7 to -1.8)                            | -38.0 (-50.6 to -24.0)              |
| Ecuador                             | 38.9 (34.9 to 43.4)        | 32.0 (27.4 to 37.0)        | 31.6 (26.9 to 36.9)        | 25.0 (20.4 to 29.9)        | -1.6 (-2.9 to -0.4)                            | -21.5 (-35.7 to -5.4)               |
| Peru                                | 40.0 (35.5 to 44.9)        | 41.3 (35.6 to 47.7)        | 39.4 (33.9 to 46.2)        | 27.8 (22.1 to 34.1)        | -2.7 (-3.9 to -1.5)                            | -32.6 (-44.1 to -20.6)              |
| <b>Caribbean</b>                    |                            |                            |                            |                            |                                                |                                     |
| Antigua and Barbuda                 | 32.3 (29.0 to 36.2)        | 27.7 (24.2 to 31.7)        | 27.4 (23.6 to 31.6)        | 22.7 (17.8 to 28.2)        | -1.4 (-2.7 to -0.0)                            | -18.1 (-33.8 to -0.5)               |
| The Bahamas                         | 23.1 (20.5 to 25.7)        | 16.5 (13.8 to 19.2)        | 16.5 (13.9 to 19.6)        | 13.6 (10.2 to 17.6)        | -1.3 (-3.0 to 0.4)                             | -16.9 (-36.3 to 6.6)                |
| Barbados                            | 29.1 (27.1 to 31.2)        | 20.6 (18.1 to 23.1)        | 21.1 (18.1 to 24.7)        | 17.1 (13.1 to 21.8)        | -1.3 (-2.8 to 0.4)                             | -17.0 (-34.5 to 6.7)                |
| Belize                              | 42.9 (39.1 to 46.9)        | 28.7 (24.9 to 32.7)        | 29.6 (25.6 to 34.0)        | 25.0 (18.0 to 32.0)        | -1.5 (-2.9 to -0.1)                            | -19.7 (-35.5 to -1.6)               |
| Bermuda                             | 15.0 (13.2 to 16.9)        | 4.1 (3.6 to 4.7)           | 4.4 (3.8 to 5.1)           | 4.3 (3.3 to 5.5)           | 0.4 (-1.2 to 1.9)                              | 6.2 (-6.8 to 33.7)                  |
| Cuba                                | 24.0 (22.9 to 25.3)        | 26.0 (24.8 to 27.4)        | 25.3 (22.8 to 28.2)        | 19.6 (15.4 to 24.6)        | -1.9 (-3.5 to -0.4)                            | -24.8 (-40.8 to -6.0)               |
| Dominica                            | 35.0 (29.8 to 40.5)        | 22.0 (19.4 to 25.1)        | 22.9 (19.5 to 27.0)        | 18.2 (14.1 to 23.7)        | -1.3 (-2.9 to 0.4)                             | -16.9 (-35.3 to 5.5)                |
| Dominican Republic                  | 64.3 (57.4 to 71.7)        | 47.1 (41.0 to 54.0)        | 47.3 (40.7 to 54.5)        | 35.9 (28.8 to 43.3)        | -1.8 (-3.2 to -0.5)                            | -23.7 (-38.6 to -7.7)               |
| Grenada                             | 27.4 (25.1 to 29.7)        | 25.9 (22.8 to 29.3)        | 25.1 (21.8 to 28.9)        | 18.2 (14.5 to 22.0)        | -2.4 (-3.9 to -1.0)                            | -29.5 (-44.6 to -14.0)              |
| Guyana                              | 44.8 (41.8 to 48.0)        | 36.1 (31.1 to 41.3)        | 36.5 (31.6 to 42.1)        | 25.6 (20.2 to 31.6)        | -2.3 (-3.7 to -0.9)                            | -29.1 (-42.9 to -12.9)              |
| Haiti                               | 32.0 (29.0 to 35.1)        | 24.8 (21.3 to 28.9)        | 24.8 (21.2 to 28.9)        | 17.0 (12.9 to 22.1)        | -2.6 (-4.1 to -1.1)                            | -31.6 (-46.1 to -15.7)              |
| Jamaica                             | 34.6 (31.1 to 38.1)        | 21.9 (19.4 to 24.6)        | 22.3 (19.5 to 25.4)        | 18.9 (14.9 to 23.7)        | -1.0 (-2.6 to 0.4)                             | -13.8 (-32.0 to 6.6)                |
| Puerto Rico                         | 34.5 (32.7 to 36.3)        | 16.5 (15.0 to 18.2)        | 16.7 (14.5 to 19.1)        | 14.6 (11.3 to 18.7)        | -0.9 (-2.5 to 0.7)                             | -11.5 (-31.3 to 11.4)               |
| Saint Lucia                         | 28.6 (25.2 to 32.3)        | 23.8 (20.3 to 27.9)        | 23.5 (19.9 to 27.4)        | 16.3 (12.9 to 20.3)        | -2.6 (-4.0 to -1.1)                            | -31.3 (-45.4 to -14.9)              |
| Saint Vincent and the Grenadines    | 39.0 (35.5 to 42.7)        | 31.6 (27.3 to 36.1)        | 30.9 (26.4 to 36.0)        | 23.3 (18.4 to 29.3)        | -2.1 (-3.7 to -0.5)                            | -26.0 (-42.4 to -7.4)               |
| Suriname                            | 35.9 (32.9 to 39.5)        | 30.7 (27.4 to 34.2)        | 29.6 (25.6 to 34.2)        | 22.8 (17.9 to 28.4)        | -2.0 (-3.5 to -0.5)                            | -25.6 (-40.6 to -7.1)               |
| Trinidad and Tobago                 | 17.2 (15.9 to 18.6)        | 19.8 (17.5 to 22.3)        | 19.5 (17.0 to 22.4)        | 15.4 (12.1 to 19.7)        | -1.7 (-3.3 to -0.2)                            | -21.8 (-38.8 to -2.7)               |
| Virgin Islands, U.S.                | 35.1 (30.6 to 40.4)        | 26.9 (22.6 to 31.2)        | 26.4 (22.6 to 30.9)        | 19.4 (15.2 to 24.1)        | -2.2 (-3.8 to -0.8)                            | -27.5 (-43.8 to -11.0)              |
| <b>Central Latin America</b>        |                            |                            |                            |                            |                                                |                                     |
| Colombia                            | 46.2 (42.3 to 50.2)        | 33.6 (29.1 to 38.6)        | 32.6 (28.1 to 37.7)        | 21.3 (16.5 to 26.7)        | -3.1 (-4.6 to -1.4)                            | -36.4 (-50.1 to -19.1)              |
| Costa Rica                          | 35.0 (32.9 to 37.3)        | 29.9 (28.4 to 31.5)        | 28.7 (25.8 to 32.0)        | 21.2 (16.2 to 26.9)        | -2.4 (-4.0 to -0.8)                            | -29.3 (-45.1 to -10.9)              |
| El Salvador                         | 45.9 (43.0 to 48.8)        | 34.7 (30.8 to 38.7)        | 34.5 (30.3 to 39.1)        | 23.6 (18.4 to 29.7)        | -2.6 (-4.2 to -1.1)                            | -31.9 (-46.5 to -15.5)              |
| Guatemala                           | 51.7 (48.9 to 54.5)        | 39.3 (34.6 to 44.0)        | 39.0 (33.8 to 44.9)        | 28.2 (22.0 to 35.2)        | -2.2 (-3.8 to -0.7)                            | -28.1 (-43.6 to -9.8)               |
| Honduras                            | 57.2 (53.7 to 61.1)        | 45.4 (40.2 to 51.6)        | 45.1 (39.2 to 51.9)        | 29.8 (24.0 to 36.5)        | -2.8 (-4.3 to -1.5)                            | -34.3 (-47.6 to -19.6)              |
| Mexico                              | 40.7 (35.8 to 45.8)        | 35.9 (30.9 to 41.5)        | 35.9 (30.7 to 42.0)        | 25.9 (19.5 to 34.0)        | -2.2 (-3.8 to -0.8)                            | -27.7 (-43.7 to -11.0)              |
| Nicaragua                           | 53.8 (50.1 to 57.5)        | 42.4 (37.0 to 48.6)        | 41.5 (35.8 to 47.7)        | 28.7 (22.6 to 35.3)        | -2.6 (-4.1 to -1.2)                            | -32.2 (-45.9 to -16.6)              |
| Panama                              | 41.7 (36.8 to 46.8)        | 40.7 (34.9 to 46.9)        | 39.6 (34.1 to 45.9)        | 29.1 (23.3 to 36.1)        | -2.3 (-3.7 to -0.7)                            | -28.3 (-43.0 to -10.4)              |
| Venezuela                           | 46.6 (45.5 to 48.2)        | 51.5 (49.8 to 53.5)        | 46.4 (41.8 to 51.4)        | 34.0 (27.6 to 41.4)        | -2.8 (-4.1 to -1.5)                            | -33.9 (-46.1 to -19.8)              |
| <b>Tropical Latin America</b>       |                            |                            |                            |                            |                                                |                                     |
| Brazil                              | 38.4 (35.1 to 41.5)        | 28.3 (24.7 to 32.8)        | 27.0 (23.4 to 31.4)        | 19.8 (15.5 to 25.0)        | -2.4 (-3.7 to -1.0)                            | -30.1 (-42.7 to -14.5)              |
| Paraguay                            | 35.5 (31.4 to 39.9)        | 34.2 (29.4 to 39.6)        | 32.7 (27.9 to 38.0)        | 21.0 (16.6 to 26.2)        | -3.3 (-4.7 to -1.9)                            | -38.5 (-50.9 to -24.9)              |
| <b>North Africa and Middle East</b> |                            |                            |                            |                            |                                                |                                     |
| <b>North Africa and Middle East</b> |                            |                            |                            |                            |                                                |                                     |
| Afghanistan                         | 59.9 (53.9 to 66.0)        | 47.0 (40.8 to 54.0)        | 46.2 (40.1 to 53.8)        | 20.7 (14.7 to 27.7)        | -5.5 (-7.3 to -3.9)                            | -56.0 (-66.5 to -43.9)              |
| Algeria                             | 9.5 (8.1 to 10.9)          | 5.3 (4.5 to 6.3)           | 4.8 (4.1 to 5.8)           | 2.9 (2.1 to 4.0)           | -4.1 (-6.2 to -2.1)                            | -45.6 (-60.4 to -26.5)              |
| Bahrain                             | 10.6 (9.1 to 12.3)         | 7.4 (6.2 to 8.8)           | 7.5 (6.3 to 9.0)           | 5.2 (3.6 to 7.3)           | -2.5 (-4.4 to -0.4)                            | -29.9 (-48.5 to -5.1)               |
| Egypt                               | 29.3 (25.8 to 33.2)        | 34.1 (29.0 to 39.3)        | 29.9 (25.5 to 35.0)        | 18.7 (13.7 to 24.7)        | -4.1 (-5.9 to -2.1)                            | -45.2 (-58.9 to -26.7)              |
| Iran                                | 27.2 (23.4 to 31.1)        | 14.0 (11.9 to 16.4)        | 12.9 (10.9 to 15.6)        | 9.5 (6.5 to 13.6)          | -2.7 (-4.9 to -0.4)                            | -32.0 (-52.0 to -5.9)               |
| Iraq                                | 40.0 (35.8 to 44.3)        | 29.5 (25.2 to 34.7)        | 28.9 (24.7 to 34.4)        | 21.6 (15.9 to 28.4)        | -2.1 (-4.0 to -0.2)                            | -26.6 (-45.0 to -3.5)               |
| Jordan                              | 19.1 (16.4 to 22.2)        | 12.6 (10.6 to 14.8)        | 12.4 (10.4 to 14.8)        | 9.0 (6.1 to 12.6)          | -2.3 (-4.6 to -0.2)                            | -28.3 (-49.5 to -2.9)               |
| Kuwait                              | 9.1 (7.9 to 10.4)          | 4.0 (3.3 to 4.7)           | 3.6 (3.0 to 4.5)           | 2.6 (1.8 to 3.6)           | -2.9 (-5.1 to -0.9)                            | -34.4 (-53.4 to -13.1)              |
| Lebanon                             | 46.5 (40.6 to 52.7)        | 29.3 (25.1 to 35.0)        | 28.4 (24.1 to 33.9)        | 12.3 (9.1 to 15.9)         | -5.8 (-7.7 to -3.9)                            | -57.9 (-68.5 to -44.6)              |
| Libya                               | 9.6 (8.2 to 11.2)          | 6.9 (5.7 to 8.3)           | 6.6 (5.5 to 8.1)           | 4.0 (2.9 to 5.6)           | -3.6 (-5.6 to -1.5)                            | -40.8 (-56.8 to -19.8)              |

|                                               | Estimate in 2000 (95% UIs) | Estimate in 2015 (95% UIs) | Estimate in 2017 (95% UIs) | Estimate in 2030 (95% UIs) | Annualised rate of change, 2015-2030 (95% UIs) | Percent change, 2015-2030 (95% UIs) |
|-----------------------------------------------|----------------------------|----------------------------|----------------------------|----------------------------|------------------------------------------------|-------------------------------------|
| Morocco                                       | 19.9 (17.1 to 22.8)        | 19.5 (8.7 to 12.6)         | 19.8 (8.2 to 11.8)         | 4.8 (3.4 to 6.6)           | -5.3 (-7.4 to -3.3)                            | -54.6 (-47.3 to -39.3)              |
| Palestine                                     | 54.8 (50.1 to 59.8)        | 38.5 (33.5 to 44.5)        | 36.7 (31.8 to 42.9)        | 28.9 (20.7 to 38.2)        | -2.0 (-3.8 to -0.3)                            | -25.0 (-43.5 to -4.8)               |
| Oman                                          | 11.6 (9.8 to 13.4)         | 6.3 (5.5 to 7.2)           | 6.0 (5.2 to 6.9)           | 3.8 (2.7 to 5.1)           | -3.4 (-5.5 to -1.5)                            | -39.3 (-56.5 to -19.6)              |
| Qatar                                         | 9.0 (7.9 to 10.1)          | 4.9 (4.2 to 5.7)           | 4.8 (4.1 to 5.7)           | 3.1 (2.2 to 4.3)           | -3.0 (-5.2 to -1.0)                            | -35.7 (-53.8 to -13.8)              |
| Saudi Arabia                                  | 17.1 (14.3 to 20.3)        | 5.4 (4.6 to 6.3)           | 5.1 (4.3 to 6.0)           | 3.6 (2.5 to 5.0)           | -2.7 (-4.8 to -0.5)                            | -32.5 (-51.2 to -7.4)               |
| Sudan                                         | 69.9 (63.8 to 76.1)        | 42.0 (36.5 to 48.0)        | 39.6 (34.3 to 46.0)        | 19.0 (13.9 to 25.2)        | -5.3 (-7.3 to -3.4)                            | -54.6 (-66.4 to -40.3)              |
| Swia                                          | 32.5 (31.5 to 33.5)        | 16.6 (14.4 to 19.4)        | 15.6 (13.3 to 18.6)        | 8.9 (6.2 to 12.6)          | -4.3 (-6.3 to -2.1)                            | -46.5 (-61.2 to -27.4)              |
| Tunisia                                       | 8.4 (7.1 to 9.8)           | 3.4 (2.8 to 4.1)           | 3.1 (2.6 to 3.8)           | 2.1 (1.5 to 2.9)           | -3.2 (-5.0 to -1.3)                            | -37.7 (-52.7 to -17.7)              |
| Turkey                                        | 28.7 (25.3 to 32.4)        | 14.2 (12.1 to 16.7)        | 13.4 (11.3 to 15.8)        | 8.5 (5.9 to 11.8)          | -3.5 (-5.4 to -1.5)                            | -40.2 (-55.5 to -19.8)              |
| United Arab Emirates                          | 16.7 (14.2 to 19.5)        | 6.3 (5.4 to 7.5)           | 6.6 (5.5 to 7.9)           | 5.4 (3.7 to 7.7)           | -1.2 (-3.2 to 1.0)                             | -14.8 (-38.2 to 15.8)               |
| Yemen                                         | 67.4 (61.1 to 73.7)        | 37.6 (32.6 to 43.4)        | 36.9 (31.9 to 43.0)        | 18.7 (13.6 to 24.9)        | -4.7 (-6.7 to -2.9)                            | -50.1 (-63.1 to -35.5)              |
| <b>South Asia</b>                             |                            |                            |                            |                            |                                                |                                     |
| Bangladesh                                    | 52.6 (47.6 to 57.7)        | 37.0 (31.9 to 42.5)        | 35.6 (30.5 to 41.3)        | 20.3 (16.2 to 24.8)        | -4.0 (-5.2 to -2.9)                            | -45.1 (-54.1 to -35.4)              |
| Bhutan                                        | 31.2 (26.5 to 36.3)        | 18.4 (15.5 to 22.0)        | 17.6 (14.8 to 21.2)        | 9.4 (7.6 to 11.6)          | -4.5 (-5.5 to -3.3)                            | -48.7 (-56.4 to -39.4)              |
| India                                         | 26.8 (23.7 to 30.1)        | 12.7 (10.9 to 15.0)        | 13.0 (10.9 to 15.7)        | 6.5 (5.2 to 8.0)           | -4.5 (-5.8 to -3.3)                            | -49.0 (-58.4 to -39.1)              |
| Nepal                                         | 53.3 (48.6 to 58.2)        | 30.8 (26.6 to 35.6)        | 30.4 (26.1 to 35.2)        | 17.1 (13.5 to 21.5)        | -4.0 (-5.1 to -2.8)                            | -44.7 (-53.4 to -34.4)              |
| Pakistan                                      | 38.0 (33.6 to 42.7)        | 21.6 (18.3 to 25.4)        | 21.5 (18.2 to 25.8)        | 10.0 (8.2 to 12.1)         | -5.1 (-6.2 to -4.0)                            | -53.4 (-60.6 to -45.0)              |
| <b>Southeast Asia, East Asia, and Oceania</b> |                            |                            |                            |                            |                                                |                                     |
| <b>East Asia</b>                              |                            |                            |                            |                            |                                                |                                     |
| China                                         | 2.6 (2.3 to 3.0)           | 4.7 (4.5 to 5.0)           | 4.7 (4.3 to 5.1)           | 3.6 (2.0 to 6.0)           | -2.1 (-5.6 to 1.6)                             | -23.6 (-57.1 to 27.2)               |
| North Korea                                   | 2.7 (2.2 to 3.3)           | 1.1 (0.9 to 1.3)           | 1.0 (0.8 to 1.2)           | 0.9 (0.6 to 1.3)           | -1.5 (-3.6 to 1.1)                             | -18.4 (-41.5 to 17.1)               |
| Taiwan (Province of China)                    | 7.5 (6.9 to 8.0)           | 2.2 (1.9 to 2.6)           | 2.3 (1.9 to 2.8)           | 1.2 (0.7 to 1.9)           | -4.4 (-7.6 to -1.1)                            | -46.4 (-68.2 to -14.6)              |
| <b>Oceania</b>                                |                            |                            |                            |                            |                                                |                                     |
| American Samoa                                | 22.8 (19.4 to 26.3)        | 18.1 (15.2 to 21.2)        | 18.0 (15.2 to 21.3)        | 18.2 (14.6 to 22.6)        | 0.0 (-1.3 to 1.2)                              | 1.0 (-17.2 to 20.3)                 |
| Federated States of Micronesia                | 22.2 (20.4 to 24.1)        | 18.8 (16.0 to 21.9)        | 18.6 (15.7 to 21.8)        | 11.7 (9.1 to 14.6)         | -3.2 (-4.5 to -1.9)                            | -37.5 (-48.9 to -25.0)              |
| Fiji                                          | 20.0 (17.6 to 22.6)        | 17.4 (14.8 to 20.1)        | 16.6 (14.1 to 19.5)        | 10.4 (8.4 to 12.8)         | -3.4 (-4.8 to -2.2)                            | -40.1 (-51.5 to -28.0)              |
| Guam                                          | 29.4 (26.1 to 32.8)        | 22.4 (19.4 to 25.6)        | 22.7 (19.3 to 26.6)        | 17.9 (14.5 to 21.9)        | -1.5 (-2.8 to -0.3)                            | -20.3 (-34.5 to -4.1)               |
| Kiribati                                      | 21.0 (18.8 to 23.3)        | 19.2 (16.3 to 22.5)        | 18.6 (15.8 to 21.9)        | 10.8 (8.7 to 13.4)         | -3.8 (-5.3 to -2.5)                            | -43.4 (-54.5 to -31.6)              |
| Marshall Islands                              | 40.7 (38.5 to 43.1)        | 32.4 (28.5 to 36.5)        | 31.4 (27.6 to 36.2)        | 24.6 (19.8 to 30.5)        | -1.8 (-3.0 to -0.7)                            | -23.9 (-36.5 to -10.2)              |
| Northern Mariana Islands                      | 23.3 (19.7 to 26.9)        | 20.9 (18.3 to 23.7)        | 23.2 (20.3 to 26.5)        | 17.9 (14.0 to 22.0)        | -1.1 (-2.4 to 0.1)                             | -14.6 (-29.8 to 1.7)                |
| Papua New Guinea                              | 33.0 (28.5 to 37.9)        | 30.1 (25.7 to 35.3)        | 29.4 (24.9 to 34.5)        | 20.6 (16.5 to 25.5)        | -2.5 (-3.7 to -1.4)                            | -31.4 (-42.6 to -19.4)              |
| Samoa                                         | 15.9 (13.4 to 18.7)        | 20.7 (17.8 to 24.4)        | 20.1 (17.1 to 24.0)        | 15.4 (12.4 to 18.7)        | -2.0 (-3.3 to -0.8)                            | -25.8 (-39.1 to -10.8)              |
| Solomon Islands                               | 37.7 (32.3 to 43.3)        | 30.0 (25.8 to 35.0)        | 29.4 (25.0 to 34.4)        | 20.6 (15.7 to 26.0)        | -2.5 (-3.9 to -1.3)                            | -31.4 (-44.2 to -18.2)              |
| Tonga                                         | 10.9 (9.4 to 12.6)         | 8.3 (7.0 to 9.9)           | 8.2 (6.8 to 9.8)           | 6.0 (4.8 to 7.5)           | -2.1 (-3.4 to -0.7)                            | -27.0 (-40.1 to -10.3)              |
| Vanuat                                        | 31.4 (27.6 to 35.8)        | 25.1 (21.4 to 29.6)        | 24.2 (20.6 to 28.8)        | 17.1 (13.7 to 21.1)        | -2.6 (-3.8 to -1.4)                            | -31.6 (-43.3 to -18.4)              |
| <b>Southeast Asia</b>                         |                            |                            |                            |                            |                                                |                                     |
| Cambodia                                      | 31.3 (28.3 to 34.4)        | 22.5 (19.2 to 26.5)        | 21.6 (18.4 to 25.8)        | 10.4 (7.9 to 13.8)         | -5.2 (-6.8 to -3.5)                            | -53.4 (-63.8 to -40.4)              |
| Indonesia                                     | 21.4 (19.3 to 23.6)        | 13.7 (11.6 to 16.1)        | 13.6 (11.5 to 15.9)        | 9.2 (6.8 to 12.2)          | -2.7 (-4.4 to -1.1)                            | -33.1 (-48.5 to -14.6)              |
| Laos                                          | 43.5 (39.6 to 47.4)        | 32.7 (28.2 to 38.1)        | 31.7 (27.2 to 37.4)        | 19.4 (15.2 to 24.0)        | -3.5 (-5.0 to -2.0)                            | -40.5 (-52.8 to -25.8)              |
| Malaysia                                      | 6.6 (6.1 to 7.0)           | 6.2 (5.6 to 6.8)           | 5.8 (5.0 to 6.8)           | 3.7 (3.2 to 5.0)           | -3.4 (-5.0 to -1.5)                            | -39.3 (-53.1 to -20.4)              |
| Moldives                                      | 15.8 (13.7 to 18.1)        | 9.1 (7.8 to 10.8)          | 8.6 (7.2 to 10.3)          | 4.5 (3.2 to 6.2)           | -4.8 (-6.5 to -3.1)                            | -51.0 (-62.1 to -36.8)              |
| Mauritius                                     | 21.4 (19.2 to 23.8)        | 11.9 (10.3 to 13.6)        | 12.3 (10.3 to 14.4)        | 9.2 (6.9 to 12.3)          | -1.8 (-3.6 to 0.0)                             | -22.8 (-41.5 to -0.1)               |
| Myanmar                                       | 21.1 (18.1 to 24.2)        | 12.6 (10.8 to 15.0)        | 12.5 (10.5 to 15.0)        | 7.5 (5.8 to 10.2)          | -3.3 (-5.0 to -1.7)                            | -38.5 (-52.9 to -22.5)              |
| Philippines                                   | 26.2 (22.8 to 29.7)        | 28.1 (24.0 to 32.9)        | 27.3 (23.2 to 32.5)        | 18.9 (14.6 to 23.7)        | -2.7 (-4.3 to -1.1)                            | -32.5 (-47.4 to -15.1)              |
| Sri Lanka                                     | 17.3 (14.6 to 20.5)        | 9.5 (8.0 to 11.2)          | 9.1 (7.5 to 10.8)          | 6.1 (4.5 to 8.0)           | -3.0 (-4.8 to -1.2)                            | -35.7 (-51.0 to -16.9)              |
| Seychelles                                    | 28.1 (25.2 to 31.2)        | 30.8 (27.1 to 34.8)        | 29.1 (25.4 to 33.3)        | 22.2 (17.6 to 28.0)        | -2.2 (-3.5 to -0.8)                            | -27.9 (-41.0 to -10.8)              |
| Thailand                                      | 27.1 (23.3 to 31.3)        | 18.3 (15.6 to 21.6)        | 17.5 (14.7 to 21.2)        | 11.9 (8.9 to 15.6)         | -2.9 (-4.6 to -1.2)                            | -35.1 (-50.0 to -17.1)              |
| Timor-Leste                                   | 63.6 (56.9 to 70.8)        | 29.3 (24.7 to 34.4)        | 29.9 (25.3 to 35.0)        | 16.9 (12.8 to 21.6)        | -3.7 (-5.3 to -2.2)                            | -42.1 (-55.0 to -27.7)              |
| Vietnam                                       | 17.2 (15.5 to 19.1)        | 13.3 (11.4 to 15.9)        | 12.4 (10.6 to 14.9)        | 7.7 (5.5 to 10.1)          | -3.7 (-5.5 to -2.1)                            | -42.5 (-55.9 to -27.0)              |
| <b>Sub-Saharan Africa</b>                     |                            |                            |                            |                            |                                                |                                     |
| <b>Central Sub-Saharan Africa</b>             |                            |                            |                            |                            |                                                |                                     |
| Angola                                        | 77.5 (70.1 to 84.7)        | 58.1 (51.3 to 65.7)        | 53.9 (47.2 to 61.1)        | 34.8 (30.8 to 38.9)        | -3.4 (-4.0 to -2.8)                            | -40.1 (-45.2 to -34.6)              |
| Central African Republic                      | 66.7 (59.5 to 74.0)        | 45.6 (39.5 to 52.7)        | 42.8 (36.8 to 49.4)        | 27.4 (22.1 to 34.1)        | -3.4 (-4.3 to -2.5)                            | -40.0 (-47.5 to -31.8)              |
| Congo                                         | 59.8 (56.1 to 63.9)        | 35.4 (31.1 to 40.5)        | 32.6 (28.3 to 37.9)        | 21.0 (18.2 to 24.4)        | -3.5 (-4.2 to -2.8)                            | -40.6 (-46.8 to -34.3)              |
| Democratic Republic of the Congo              | 59.3 (55.3 to 63.4)        | 42.4 (38.0 to 47.0)        | 40.7 (36.0 to 45.7)        | 28.0 (24.8 to 31.4)        | -2.8 (-3.4 to -2.2)                            | -34.0 (-40.3 to -28.1)              |
| Equatorial Guinea                             | 82.0 (73.6 to 90.2)        | 53.5 (46.8 to 61.3)        | 51.7 (44.7 to 59.1)        | 29.0 (25.6 to 32.5)        | -4.1 (-4.7 to -3.4)                            | -45.7 (-50.9 to -40.3)              |
| Gabon                                         | 53.5 (46.3 to 60.3)        | 33.0 (27.9 to 39.0)        | 31.3 (26.7 to 37.2)        | 25.1 (22.0 to 29.1)        | -1.8 (-2.5 to -1.1)                            | -23.7 (-31.1 to -15.8)              |
| <b>Eastern Sub-Saharan Africa</b>             |                            |                            |                            |                            |                                                |                                     |
| Burundi                                       | 28.5 (25.2 to 31.9)        | 24.7 (21.4 to 28.8)        | 24.7 (21.2 to 28.9)        | 16.9 (14.3 to 19.9)        | -2.5 (-3.4 to -1.7)                            | -31.6 (-39.6 to -22.6)              |
| Comoros                                       | 42.9 (37.8 to 48.1)        | 22.6 (19.3 to 26.5)        | 21.5 (18.3 to 25.2)        | 11.5 (9.7 to 13.5)         | -4.5 (-5.4 to -3.6)                            | -49.0 (-55.3 to -41.6)              |
| Djibouti                                      | 60.6 (52.7 to 68.6)        | 26.0 (21.8 to 30.8)        | 24.8 (20.9 to 29.2)        | 15.5 (11.2 to 19.9)        | -4.4 (-5.3 to -3.5)                            | -48.1 (-55.1 to -40.6)              |
| Eritrea                                       | 44.8 (38.6 to 51.3)        | 24.6 (20.8 to 29.3)        | 23.7 (20.0 to 28.2)        | 13.2 (11.0 to 15.6)        | -4.2 (-5.0 to -3.3)                            | -46.3 (-53.1 to -38.9)              |
| Ethiopia                                      | 74.1 (68.4 to 79.5)        | 43.8 (38.5 to 50.0)        | 42.6 (37.0 to 49.2)        | 23.0 (19.8 to 26.4)        | -4.3 (-5.1 to -3.6)                            | -47.5 (-53.3 to -41.7)              |
| Kenya                                         | 52.6 (47.8 to 57.8)        | 34.5 (29.7 to 39.9)        | 34.3 (29.4 to 40.3)        | 23.0 (18.9 to 27.9)        | -2.7 (-3.8 to -1.6)                            | -33.3 (-43.5 to -21.5)              |
| Madagascar                                    | 73.5 (68.1 to 78.8)        | 62.4 (55.5 to 69.2)        | 61.4 (54.2 to 69.2)        | 45.0 (40.4 to 50.2)        | -2.2 (-2.8 to -1.6)                            | -27.8 (-34.0 to -20.9)              |
| Malawi                                        | 83.5 (79.7 to 87.5)        | 54.4 (49.2 to 60.0)        | 53.3 (47.6 to 59.7)        | 36.8 (32.4 to 41.9)        | -2.6 (-3.3 to -2.0)                            | -32.4 (-38.7 to -25.9)              |
| Mozambique                                    | 82.5 (79.2 to 85.7)        | 48.0 (43.6 to 51.7)        | 46.0 (41.1 to 51.7)        | 28.7 (23.9 to 34.3)        | -3.4 (-4.3 to -2.6)                            | -40.2 (-47.7 to -32.1)              |
| Rwanda                                        | 22.3 (20.1 to 24.9)        | 14.9 (12.7 to 17.5)        | 14.6 (12.4 to 17.4)        | 8.8 (7.4 to 10.5)          | -3.6 (-4.4 to -2.7)                            | -41.2 (-48.7 to -33.3)              |
| Somalia                                       | 68.8 (60.5 to 77.0)        | 44.9 (38.9 to 51.7)        | 44.4 (38.3 to 51.6)        | 24.3 (20.8 to 28.2)        | -4.1 (-4.8 to -3.4)                            | -45.7 (-51.4 to -39.8)              |
| South Sudan                                   | 72.8 (64.7 to 80.8)        | 61.2 (53.6 to 69.9)        | 60.0 (52.6 to 68.6)        | 48.0 (42.6 to 54.5)        | -1.6 (-2.2 to -1.1)                            | -21.4 (-27.6 to -15.1)              |
| Tanzania                                      | 60.9 (57.3 to 64.5)        | 48.9 (43.6 to 55.2)        | 47.4 (41.7 to 54.0)        | 36.4 (32.3 to 41.3)        | -2.0 (-2.6 to -1.3)                            | -25.4 (-32.3 to -17.6)              |
| Uganda                                        | 84.2 (80.3 to 88.0)        | 52.4 (47.6 to 57.7)        | 51.4 (46.2 to 57.5)        | 33.1 (29.2 to 37.4)        | -3.1 (-3.7 to -2.4)                            | -36.9 (-44.9 to -30.3)              |
| Zambia                                        | 71.4 (64.7 to 78.0)        | 52.3 (46.0 to 60.3)        | 50.1 (43.6 to 57.8)        | 37.3 (32.9 to 42.2)        | -2.3 (-3.0 to -1.6)                            | -28.6 (-36.0 to -21.0)              |
| <b>Southern Sub-Saharan Africa</b>            |                            |                            |                            |                            |                                                |                                     |
| Botswana                                      | 36.1 (32.2 to 40.1)        | 23.4 (20.3 to 27.2)        | 22.5 (19.4 to 26.4)        | 15.8 (13.1 to 19.1)        | -2.6 (-3.6 to -1.7)                            | -32.2 (-41.5 to -23.0)              |
| Lesotho                                       | 41.5 (38.8 to 44.6)        | 35.8 (31.8 to 40.5)        | 34.9 (30.5 to 40.3)        | 26.0 (22.6 to 30.0)        | -2.1 (-2.9 to -1.3)                            | -27.2 (-35.6 to -17.4)              |
| Namibia                                       | 36.4 (33.9 to 39.4)        | 29.3 (26.1 to 33.2)        | 27.8 (24.4 to 32.0)        | 19.8 (16.5 to 23.3)        | -2.6 (-3.5 to -1.8)                            | -32.4 (-41.0 to -23.9)              |
| South Africa                                  | 36.6 (31.6 to 42.2)        | 31.1 (26.6 to 36.9)        | 29.3 (24.9 to 34.9)        | 20.0 (16.8 to 23.6)        | -2.9 (-3.9 to -2.0)                            | -35.6 (-44.4 to -25.8)              |
| Swaziland                                     | 47.6 (44.3 to 51.0)        | 37.8 (33.2 to 43.1)        | 36.8 (32.1 to 42.7)        | 29.1 (25.3 to 33.8)        | -1.7 (-2.6 to -1.0)                            | -22.8 (-32.1 to -13.3)              |

|                                                                                                                                                                                                                         | Estimate in 2000 (95% UIs) | Estimate in 2015 (95% UIs) | Estimate in 2017 (95% UIs) | Estimate in 2020 (95% UIs) | Annualised rate of change, 2015-2020 (95% UIs) | Percent change, 2015-2020 (95% UIs) |
|-------------------------------------------------------------------------------------------------------------------------------------------------------------------------------------------------------------------------|----------------------------|----------------------------|----------------------------|----------------------------|------------------------------------------------|-------------------------------------|
| Zimbabwe                                                                                                                                                                                                                | 53.5 (50.0 to 56.9)        | 50.1 (44.9 to 55.9)        | 48.5 (43.2 to 54.8)        | 40.7 (34.6 to 47.4)        | -1.4 (-2.1 to -0.7)                            | -18.8 (-27.5 to -9.7)               |
| <b>Western Sub-Saharan Africa</b>                                                                                                                                                                                       |                            |                            |                            |                            |                                                |                                     |
| Benin                                                                                                                                                                                                                   | 56.5 (51.9 to 62.2)        | 40.9 (35.9 to 46.8)        | 39.9 (34.9 to 46.0)        | 24.0 (20.3 to 28.6)        | -3.6 (-4.3 to -2.9)                            | -41.3 (-47.4 to -35.1)              |
| Burkina Faso                                                                                                                                                                                                            | 59.7 (56.2 to 63.3)        | 46.3 (41.6 to 52.0)        | 46.1 (40.8 to 52.0)        | 29.6 (25.9 to 33.4)        | -3.0 (-3.6 to -2.4)                            | -36.1 (-42.0 to -29.7)              |
| Cameroun                                                                                                                                                                                                                | 68.7 (63.8 to 73.5)        | 45.4 (40.0 to 51.7)        | 42.8 (37.2 to 49.2)        | 29.0 (25.3 to 33.0)        | -3.0 (-3.7 to -2.3)                            | -36.1 (-42.9 to -28.8)              |
| Cape Verde                                                                                                                                                                                                              | 36.0 (32.1 to 40.1)        | 19.6 (16.6 to 23.3)        | 18.5 (15.6 to 21.9)        | 11.1 (9.2 to 12.2)         | -3.8 (-4.7 to -2.9)                            | -43.6 (-50.6 to -35.7)              |
| Chad                                                                                                                                                                                                                    | 92.9 (87.3 to 98.4)        | 79.2 (72.0 to 87.1)        | 78.0 (70.4 to 86.3)        | 60.7 (54.9 to 68.0)        | -1.8 (-2.1 to -1.5)                            | -23.4 (-27.2 to -19.7)              |
| Cote d'Ivoire                                                                                                                                                                                                           | 65.8 (59.9 to 71.9)        | 48.9 (43.4 to 55.2)        | 47.6 (41.8 to 54.2)        | 33.5 (29.6 to 38.1)        | -2.5 (-3.2 to -1.8)                            | -31.4 (-38.3 to -24.0)              |
| The Gambia                                                                                                                                                                                                              | 56.6 (49.7 to 63.8)        | 36.2 (30.7 to 42.3)        | 35.0 (29.9 to 41.1)        | 23.3 (19.8 to 27.1)        | -2.9 (-3.7 to -2.2)                            | -35.4 (-42.6 to -27.7)              |
| Ghana                                                                                                                                                                                                                   | 39.5 (34.8 to 44.6)        | 26.1 (22.2 to 30.5)        | 24.6 (20.8 to 28.9)        | 15.6 (13.3 to 18.5)        | -3.4 (-4.4 to -2.5)                            | -40.1 (-48.6 to -31.1)              |
| Guinea                                                                                                                                                                                                                  | 79.5 (74.7 to 84.5)        | 58.2 (52.8 to 64.4)        | 55.9 (50.4 to 62.4)        | 36.6 (30.7 to 43.3)        | -3.1 (-3.9 to -2.4)                            | -37.2 (-44.7 to -30.1)              |
| Guinea-Bissau                                                                                                                                                                                                           | 66.4 (58.5 to 74.2)        | 45.3 (39.2 to 52.3)        | 43.3 (37.4 to 50.0)        | 25.2 (21.5 to 29.2)        | -3.9 (-4.7 to -3.2)                            | -44.2 (-50.4 to -37.9)              |
| Liberia                                                                                                                                                                                                                 | 50.5 (46.8 to 54.9)        | 49.5 (43.9 to 56.1)        | 47.4 (41.7 to 54.3)        | 28.4 (25.0 to 32.3)        | -3.7 (-4.5 to -3.0)                            | -42.5 (-48.8 to -36.5)              |
| Mali                                                                                                                                                                                                                    | 86.2 (82.1 to 90.3)        | 69.7 (64.0 to 76.2)        | 68.7 (62.3 to 75.7)        | 52.7 (47.8 to 58.4)        | -1.9 (-2.3 to -1.4)                            | -24.3 (-29.5 to -18.9)              |
| Mauritania                                                                                                                                                                                                              | 49.0 (44.3 to 53.8)        | 34.1 (29.8 to 39.4)        | 33.0 (28.5 to 38.4)        | 21.5 (18.2 to 24.9)        | -3.1 (-3.8 to -2.4)                            | -37.0 (-43.7 to -29.9)              |
| Niger                                                                                                                                                                                                                   | 100.6 (95.4 to 106.0)      | 81.0 (73.5 to 89.0)        | 79.4 (71.7 to 87.7)        | 65.8 (59.8 to 73.3)        | -1.4 (-1.7 to -1.1)                            | -18.7 (-22.4 to -14.8)              |
| Nigeria                                                                                                                                                                                                                 | 56.8 (52.2 to 61.8)        | 44.0 (38.9 to 50.1)        | 42.8 (37.4 to 49.0)        | 32.3 (28.9 to 38.2)        | -2.1 (-2.9 to -1.3)                            | -26.6 (-35.3 to -18.0)              |
| Sao Tome and Principe                                                                                                                                                                                                   | 54.3 (50.1 to 58.2)        | 28.5 (25.0 to 32.3)        | 26.9 (23.0 to 30.8)        | 16.2 (13.9 to 18.8)        | -3.8 (-4.6 to -2.9)                            | -43.1 (-49.9 to -35.4)              |
| Senegal                                                                                                                                                                                                                 | 50.5 (45.1 to 56.5)        | 37.1 (32.0 to 42.3)        | 36.2 (31.1 to 42.3)        | 23.3 (19.9 to 27.2)        | -3.1 (-3.9 to -2.3)                            | -37.0 (-44.2 to -28.8)              |
| Sierra Leone                                                                                                                                                                                                            | 71.0 (65.1 to 76.5)        | 50.2 (44.3 to 57.1)        | 48.4 (42.3 to 55.5)        | 28.6 (23.3 to 35.3)        | -3.8 (-4.7 to -2.8)                            | -43.0 (-50.5 to -34.0)              |
| Togo                                                                                                                                                                                                                    | 44.1 (41.3 to 47.3)        | 25.8 (22.8 to 29.2)        | 24.6 (21.4 to 28.2)        | 12.7 (10.7 to 15.1)        | -4.7 (-5.5 to -3.9)                            | -50.8 (-56.5 to -44.5)              |
| <b>Indicator 3.8.1 Coverage of essential health services, as defined by the UHC service coverage index comprised of the coverage of 9 tracer interventions and 32 causes amenable to healthcare (scale of 0 to 100)</b> |                            |                            |                            |                            |                                                |                                     |
| <b>Central Europe, Eastern Europe, and Central Asia</b>                                                                                                                                                                 |                            |                            |                            |                            |                                                |                                     |
| <b>Central Asia</b>                                                                                                                                                                                                     |                            |                            |                            |                            |                                                |                                     |
| Armenia                                                                                                                                                                                                                 | 65.0 (63.9 to 66.0)        | 75.3 (74.2 to 76.6)        | 75.8 (74.6 to 77.2)        | 79.6 (76.4 to 82.7)        | 0.4 (0.1 to 0.6)                               | 5.7 (1.4 to 9.3)                    |
| Azerbaijan                                                                                                                                                                                                              | 52.4 (51.0 to 54.0)        | 68.0 (65.9 to 70.0)        | 68.7 (66.4 to 70.8)        | 72.2 (67.1 to 76.6)        | 0.4 (-0.1 to 0.8)                              | 6.1 (-1.4 to 12.9)                  |
| Georgia                                                                                                                                                                                                                 | 68.7 (67.3 to 69.8)        | 70.6 (69.5 to 71.5)        | 71.2 (69.9 to 72.3)        | 74.4 (68.5 to 79.0)        | 0.3 (-0.2 to 0.8)                              | 5.4 (-3.0 to 12.0)                  |
| Kazakhstan                                                                                                                                                                                                              | 62.5 (61.3 to 63.6)        | 72.6 (71.2 to 73.8)        | 73.1 (71.6 to 74.5)        | 78.0 (74.7 to 80.9)        | 0.5 (0.2 to 0.8)                               | 7.5 (2.3 to 12.3)                   |
| Kyrgyzstan                                                                                                                                                                                                              | 56.7 (55.5 to 57.8)        | 67.6 (66.4 to 68.6)        | 68.6 (67.3 to 69.8)        | 71.3 (66.2 to 75.1)        | 0.3 (-0.2 to 0.7)                              | 5.4 (-2.3 to 11.5)                  |
| Mongolia                                                                                                                                                                                                                | 50.5 (48.7 to 52.3)        | 65.7 (61.5 to 65.6)        | 65.7 (63.4 to 67.8)        | 71.8 (67.4 to 75.6)        | 0.8 (0.3 to 1.2)                               | 12.7 (4.1 to 20.2)                  |
| Tajikistan                                                                                                                                                                                                              | 55.9 (54.4 to 57.6)        | 60.4 (58.6 to 62.2)        | 60.6 (58.6 to 62.6)        | 60.6 (54.5 to 66.4)        | 0.0 (-0.7 to 0.6)                              | 0.3 (-9.5 to 9.4)                   |
| Turkmenistan                                                                                                                                                                                                            | 60.3 (59.2 to 61.4)        | 67.1 (65.4 to 68.6)        | 68.2 (66.5 to 70.0)        | 72.0 (66.5 to 77.2)        | 0.5 (-0.1 to 0.9)                              | 7.4 (-1.1 to 14.9)                  |
| Uzbekistan                                                                                                                                                                                                              | 61.0 (59.3 to 62.2)        | 67.0 (65.5 to 68.5)        | 67.8 (66.0 to 69.7)        | 71.1 (66.9 to 75.0)        | 0.4 (-0.0 to 0.7)                              | 6.1 (-0.6 to 11.8)                  |
| <b>Central Europe</b>                                                                                                                                                                                                   |                            |                            |                            |                            |                                                |                                     |
| Albania                                                                                                                                                                                                                 | 70.9 (69.3 to 72.5)        | 79.7 (77.4 to 82.0)        | 80.3 (77.8 to 82.6)        | 84.2 (81.0 to 86.7)        | 0.4 (0.1 to 0.7)                               | 5.7 (1.4 to 10.3)                   |
| Bosnia and Herzegovina                                                                                                                                                                                                  | 72.2 (70.5 to 73.8)        | 75.7 (74.2 to 76.9)        | 76.6 (74.9 to 78.0)        | 77.4 (73.5 to 79.9)        | 0.1 (-0.2 to 0.4)                              | 2.3 (-3.3 to 6.9)                   |
| Bulgaria                                                                                                                                                                                                                | 73.6 (72.9 to 74.2)        | 77.3 (76.5 to 78.1)        | 77.7 (76.5 to 78.8)        | 80.3 (77.7 to 82.7)        | 0.3 (0.0 to 0.5)                               | 3.9 (0.3 to 7.0)                    |
| Croatia                                                                                                                                                                                                                 | 80.5 (79.8 to 81.2)        | 85.7 (85.0 to 86.3)        | 87.2 (86.2 to 88.1)        | 90.0 (89.0 to 91.2)        | 0.3 (0.2 to 0.4)                               | 5.0 (3.5 to 6.7)                    |
| Czech Republic                                                                                                                                                                                                          | 83.8 (83.2 to 84.3)        | 88.2 (87.6 to 88.6)        | 88.6 (87.7 to 89.6)        | 90.8 (89.9 to 91.8)        | 0.2 (0.1 to 0.3)                               | 3.0 (1.9 to 4.1)                    |
| Hungary                                                                                                                                                                                                                 | 77.8 (76.9 to 78.8)        | 82.2 (81.6 to 83.1)        | 84.2 (83.0 to 85.4)        | 87.3 (85.9 to 88.6)        | 0.4 (0.3 to 0.5)                               | 6.2 (4.3 to 8.1)                    |
| Macedonia                                                                                                                                                                                                               | 72.8 (71.7 to 74.0)        | 77.6 (76.6 to 78.6)        | 77.7 (76.4 to 79.0)        | 78.6 (77.5 to 79.8)        | 0.1 (-0.0 to 0.2)                              | 1.3 (-0.6 to 3.1)                   |
| Montenegro                                                                                                                                                                                                              | 74.4 (73.3 to 75.7)        | 80.8 (79.6 to 81.9)        | 80.7 (79.3 to 82.0)        | 83.3 (81.9 to 84.7)        | 0.2 (0.1 to 0.3)                               | 3.2 (1.0 to 5.3)                    |
| Poland                                                                                                                                                                                                                  | 77.5 (76.9 to 78.1)        | 84.0 (83.3 to 84.9)        | 84.5 (83.4 to 85.6)        | 88.3 (87.4 to 89.3)        | 0.3 (0.2 to 0.4)                               | 3.2 (3.6 to 6.8)                    |
| Romania                                                                                                                                                                                                                 | 70.6 (69.6 to 71.6)        | 79.5 (78.5 to 80.3)        | 79.6 (78.4 to 80.7)        | 83.0 (80.9 to 84.7)        | 0.3 (0.1 to 0.5)                               | 4.5 (1.5 to 7.3)                    |
| Serbia                                                                                                                                                                                                                  | 69.7 (68.6 to 70.7)        | 79.5 (78.7 to 80.5)        | 80.5 (79.3 to 81.7)        | 84.2 (82.9 to 85.5)        | 0.4 (0.3 to 0.5)                               | 5.8 (3.9 to 7.8)                    |
| Slovakia                                                                                                                                                                                                                | 77.2 (76.2 to 78.0)        | 82.1 (81.3 to 82.9)        | 83.2 (81.9 to 84.3)        | 86.0 (84.3 to 87.6)        | 0.3 (0.2 to 0.4)                               | 4.7 (2.4 to 6.8)                    |
| Slovenia                                                                                                                                                                                                                | 82.0 (81.3 to 82.7)        | 90.4 (89.7 to 91.0)        | 90.7 (89.7 to 91.7)        | 93.5 (92.6 to 94.5)        | 0.2 (0.2 to 0.3)                               | 3.5 (2.3 to 4.8)                    |
| <b>Eastern Europe</b>                                                                                                                                                                                                   |                            |                            |                            |                            |                                                |                                     |
| Belarus                                                                                                                                                                                                                 | 71.5 (70.3 to 72.5)        | 83.1 (81.7 to 84.2)        | 83.6 (82.0 to 84.9)        | 86.3 (84.4 to 88.4)        | 0.3 (0.1 to 0.4)                               | 3.9 (1.6 to 6.3)                    |
| Estonia                                                                                                                                                                                                                 | 75.4 (74.7 to 76.0)        | 84.8 (83.9 to 85.6)        | 85.5 (84.0 to 87.2)        | 88.3 (86.5 to 90.1)        | 0.3 (0.1 to 0.4)                               | 4.1 (1.7 to 6.3)                    |
| Latvia                                                                                                                                                                                                                  | 74.8 (74.0 to 75.6)        | 80.8 (79.7 to 82.0)        | 81.9 (80.0 to 83.8)        | 85.4 (83.4 to 87.7)        | 0.4 (0.2 to 0.5)                               | 5.8 (3.2 to 8.3)                    |
| Lithuania                                                                                                                                                                                                               | 75.1 (74.5 to 75.7)        | 80.4 (79.5 to 81.4)        | 81.2 (80.0 to 82.4)        | 83.3 (81.9 to 84.7)        | 0.1 (0.0 to 0.3)                               | 2.3 (-0.7 to 4.6)                   |
| Moldova                                                                                                                                                                                                                 | 65.9 (64.7 to 67.2)        | 71.1 (70.0 to 72.3)        | 72.6 (71.3 to 73.9)        | 78.4 (75.4 to 81.4)        | 0.7 (0.4 to 0.9)                               | 10.3 (5.9 to 14.3)                  |
| Russia                                                                                                                                                                                                                  | 67.3 (66.7 to 68.0)        | 79.8 (79.1 to 80.6)        | 81.1 (80.2 to 82.1)        | 84.2 (81.8 to 86.3)        | 0.4 (0.2 to 0.5)                               | 5.6 (2.3 to 8.6)                    |
| Ukraine                                                                                                                                                                                                                 | 72.0 (71.1 to 72.9)        | 73.2 (72.2 to 74.0)        | 75.3 (74.0 to 76.5)        | 78.8 (76.7 to 80.7)        | 0.5 (0.3 to 0.7)                               | 7.7 (4.7 to 10.8)                   |
| <b>High-income</b>                                                                                                                                                                                                      |                            |                            |                            |                            |                                                |                                     |
| <b>Australasia</b>                                                                                                                                                                                                      |                            |                            |                            |                            |                                                |                                     |
| Australia                                                                                                                                                                                                               | 91.1 (90.7 to 91.6)        | 95.0 (94.5 to 95.5)        | 95.2 (94.1 to 96.2)        | 96.3 (95.4 to 97.2)        | 0.1 (0.0 to 0.2)                               | 1.4 (0.4 to 2.3)                    |
| New Zealand                                                                                                                                                                                                             | 87.2 (86.7 to 87.7)        | 92.6 (92.2 to 93.0)        | 92.7 (92.0 to 93.3)        | 94.3 (93.7 to 94.8)        | 0.1 (0.1 to 0.2)                               | 1.8 (1.1 to 2.6)                    |
| <b>High-income Asia Pacific</b>                                                                                                                                                                                         |                            |                            |                            |                            |                                                |                                     |
| Brunei                                                                                                                                                                                                                  | 73.5 (72.2 to 74.8)        | 76.4 (75.0 to 77.8)        | 76.5 (74.9 to 78.0)        | 78.0 (74.9 to 81.2)        | 0.1 (-0.2 to 0.4)                              | 2.0 (-3.2 to 6.6)                   |
| Japan                                                                                                                                                                                                                   | 88.4 (87.9 to 88.9)        | 93.5 (93.1 to 93.9)        | 93.7 (93.2 to 94.1)        | 94.6 (94.1 to 95.1)        | 0.1 (0.0 to 0.1)                               | 1.2 (0.5 to 1.9)                    |
| South Korea                                                                                                                                                                                                             | 81.8 (81.1 to 82.3)        | 92.0 (91.5 to 92.8)        | 92.6 (91.5 to 93.4)        | 94.7 (93.7 to 95.5)        | 0.2 (0.1 to 0.3)                               | 3.0 (1.7 to 4.3)                    |
| Singapore                                                                                                                                                                                                               | 85.2 (84.3 to 86.2)        | 91.8 (91.2 to 92.6)        | 92.4 (91.7 to 93.3)        | 94.1 (93.7 to 94.5)        | 0.2 (0.1 to 0.2)                               | 2.5 (1.4 to 3.6)                    |
| <b>High-income North America</b>                                                                                                                                                                                        |                            |                            |                            |                            |                                                |                                     |
| Canada                                                                                                                                                                                                                  | 89.7 (89.2 to 90.1)        | 92.4 (91.9 to 92.9)        | 92.8 (91.9 to 93.8)        | 94.3 (93.2 to 95.1)        | 0.1 (0.1 to 0.2)                               | 2.0 (0.9 to 3.1)                    |
| Greenland                                                                                                                                                                                                               | 71.6 (70.2 to 73.0)        | 75.8 (74.2 to 77.6)        | 77.0 (75.2 to 78.8)        | 79.4 (77.7 to 81.5)        | 0.3 (0.1 to 0.5)                               | 4.8 (1.8 to 8.0)                    |
| United States                                                                                                                                                                                                           | 86.2 (85.8 to 86.6)        | 87.9 (87.6 to 88.3)        | 87.8 (87.3 to 88.2)        | 89.7 (88.2 to 90.6)        | 0.1 (0.0 to 0.2)                               | 2.0 (0.3 to 3.0)                    |
| <b>Southern Latin America</b>                                                                                                                                                                                           |                            |                            |                            |                            |                                                |                                     |
| Argentina                                                                                                                                                                                                               | 70.5 (69.8 to 71.1)        | 74.4 (73.8 to 75.0)        | 74.7 (72.8 to 76.3)        | 76.7 (73.7 to 79.5)        | 0.2 (-0.1 to 0.4)                              | 3.1 (-1.0 to 6.8)                   |
| Chile                                                                                                                                                                                                                   | 74.2 (73.6 to 74.9)        | 80.7 (80.0 to 81.6)        | 81.0 (79.2 to 83.1)        | 81.5 (79.0 to 84.1)        | 0.1 (-0.1 to 0.3)                              | 1.0 (-2.1 to 4.1)                   |
| Uruguay                                                                                                                                                                                                                 | 72.8 (72.0 to 73.4)        | 76.6 (75.7 to 77.5)        | 77.1 (75.3 to 78.9)        | 80.3 (78.1 to 82.8)        | 0.3 (0.1 to 0.5)                               | 4.9 (2.0 to 8.0)                    |
| <b>Western Europe</b>                                                                                                                                                                                                   |                            |                            |                            |                            |                                                |                                     |
| Andorra                                                                                                                                                                                                                 | 90.5 (88.4 to 92.3)        | 93.8 (92.2 to 95.1)        | 93.9 (92.2 to 95.3)        | 94.3 (92.7 to 95.8)        | 0.0 (-0.1 to 0.2)                              | 0.6 (-1.4 to 2.8)                   |
| Austria                                                                                                                                                                                                                 | 88.4 (87.9 to 89.0)        | 92.0 (91.5 to 92.4)        | 92.2 (91.3 to 93.0)        | 93.6 (92.8 to 94.3)        | 0.1 (0.1 to 0.2)                               | 1.8 (0.9 to 2.7)                    |
| Belgium                                                                                                                                                                                                                 | 87.8 (87.2 to 88.4)        | 92.9 (92.3 to 93.5)        | 93.5 (92.5 to 94.4)        | 94.8 (94.0 to 95.6)        | 0.1 (0.1 to 0.2)                               | 2.1 (1.0 to 3.1)                    |
| Cyprus                                                                                                                                                                                                                  | 84.3 (83.2 to 85.4)        | 93.3 (92.1 to 94.3)        | 93.6 (92.4 to 94.7)        | 95.7 (94.8 to 96.5)        | 0.2 (0.1 to 0.3)                               | 2.7 (1.3 to 4.2)                    |
| Denmark                                                                                                                                                                                                                 | 86.1 (85.5 to 86.7)        | 91.9 (91.2 to 92.6)        | 91.8 (90.8 to 92.9)        | 93.7 (92.7 to 94.6)        | 0.1 (0.1 to 0.2)                               | 1.9 (0.8 to 3.1)                    |
| Finland                                                                                                                                                                                                                 | 87.7 (87.0 to 88.4)        | 92.8 (92.1 to 93.3)        | 92.5 (91.6 to 93.2)        | 94.2 (93.4 to 95.0)        | 0.1 (0.0 to 0.2)                               | 1.5 (0.6 to 2.5)                    |
| France                                                                                                                                                                                                                  | 89.0 (88.5 to 89.5)        | 93.5 (92.8 to 94.0)        | 93.6 (92.7 to 94.4)        | 94.9 (94.7 to 95.5)        | 0.1 (0.0 to 0.2)                               | 1.5 (0.5 to 2.6)                    |

|                                     | Estimate in 2000 (95% UIs) | Estimate in 2015 (95% UIs) | Estimate in 2017 (95% UIs) | Estimate in 2030 (95% UIs) | Annualised rate of change, 2015-2030 (95% UIs) | Percent change, 2015-2030 (95% UIs) |
|-------------------------------------|----------------------------|----------------------------|----------------------------|----------------------------|------------------------------------------------|-------------------------------------|
| Germany                             | 87.7 (87.2 to 88.1)        | 90.8 (90.4 to 91.2)        | 90.8 (89.3 to 92.1)        | 92.1 (90.8 to 93.4)        | 0.1 (0.0 to 0.2)                               | 1.5 (0.0 to 2.9)                    |
| Greece                              | 88.2 (87.5 to 89.0)        | 90.9 (90.3 to 91.6)        | 90.9 (90.0 to 91.8)        | 92.7 (91.8 to 93.5)        | 0.1 (0.0 to 0.2)                               | 1.9 (0.9 to 3.0)                    |
| Iceland                             | 92.8 (92.1 to 93.5)        | 95.3 (94.8 to 95.9)        | 95.0 (94.3 to 95.7)        | 96.8 (96.2 to 97.2)        | 0.1 (0.0 to 0.1)                               | 1.5 (0.7 to 2.3)                    |
| Ireland                             | 86.4 (85.8 to 87.0)        | 94.0 (93.2 to 94.5)        | 94.5 (93.5 to 95.3)        | 96.5 (95.8 to 97.2)        | 0.2 (0.1 to 0.2)                               | 2.8 (1.8 to 3.7)                    |
| Israel                              | 83.7 (82.8 to 84.5)        | 89.3 (88.6 to 89.9)        | 89.6 (88.8 to 90.5)        | 91.6 (90.8 to 92.3)        | 0.2 (0.1 to 0.2)                               | 2.6 (1.5 to 3.7)                    |
| Italy                               | 90.0 (89.6 to 90.5)        | 94.0 (93.5 to 94.4)        | 94.7 (93.9 to 95.4)        | 96.1 (95.2 to 96.7)        | 0.2 (0.1 to 0.2)                               | 2.3 (1.5 to 3.1)                    |
| Luxembourg                          | 90.2 (89.4 to 91.0)        | 94.1 (93.2 to 94.8)        | 94.2 (93.1 to 95.2)        | 95.9 (95.0 to 96.6)        | 0.1 (0.0 to 0.2)                               | 2.0 (0.7 to 3.2)                    |
| Malta                               | 85.5 (84.7 to 86.3)        | 89.7 (88.8 to 90.4)        | 89.6 (88.5 to 90.5)        | 92.5 (91.6 to 93.2)        | 0.2 (0.1 to 0.3)                               | 3.1 (1.9 to 4.4)                    |
| Netherlands                         | 89.5 (88.9 to 90.1)        | 94.7 (94.2 to 95.1)        | 94.5 (93.7 to 95.1)        | 95.9 (95.2 to 96.4)        | 0.1 (0.0 to 0.1)                               | 1.3 (0.5 to 2.0)                    |
| Norway                              | 88.9 (88.1 to 89.4)        | 95.3 (94.7 to 95.7)        | 95.1 (94.5 to 95.6)        | 96.4 (95.8 to 96.9)        | 0.1 (0.0 to 0.1)                               | 1.2 (0.4 to 2.0)                    |
| Portugal                            | 82.1 (81.5 to 82.7)        | 90.0 (89.3 to 90.6)        | 90.2 (89.1 to 91.1)        | 92.2 (92.3 to 94.0)        | 0.2 (0.2 to 0.3)                               | 3.6 (2.3 to 4.7)                    |
| Spain                               | 88.1 (87.7 to 88.6)        | 93.4 (92.9 to 93.8)        | 93.6 (92.9 to 94.3)        | 95.3 (94.7 to 95.8)        | 0.1 (0.1 to 0.2)                               | 2.0 (1.2 to 2.7)                    |
| Sweden                              | 91.7 (91.2 to 92.1)        | 94.2 (93.8 to 94.8)        | 94.6 (93.9 to 95.1)        | 95.3 (94.5 to 96.1)        | 0.1 (0.0 to 0.1)                               | 1.2 (0.2 to 2.1)                    |
| Switzerland                         | 91.7 (91.1 to 92.2)        | 95.2 (94.6 to 95.7)        | 95.7 (94.8 to 96.5)        | 96.2 (95.3 to 97.0)        | 0.1 (0.0 to 0.1)                               | 1.1 (0.1 to 2.0)                    |
| United Kingdom                      | 86.7 (86.3 to 87.2)        | 91.0 (90.5 to 91.5)        | 91.0 (90.5 to 91.6)        | 92.5 (91.7 to 92.7)        | 0.1 (0.1 to 0.2)                               | 1.7 (0.7 to 2.5)                    |
| <b>Latin America and Caribbean</b>  |                            |                            |                            |                            |                                                |                                     |
| <b>Andean Latin America</b>         |                            |                            |                            |                            |                                                |                                     |
| Bolivia                             | 45.5 (43.7 to 47.4)        | 60.0 (56.8 to 63.7)        | 61.0 (57.8 to 65.0)        | 67.5 (62.6 to 72.0)        | 0.8 (0.2 to 1.4)                               | 12.7 (3.0 to 22.8)                  |
| Ecuador                             | 61.7 (60.6 to 62.7)        | 67.8 (66.4 to 69.0)        | 67.9 (66.0 to 69.7)        | 69.4 (65.5 to 72.7)        | 0.2 (-0.2 to 0.5)                              | 2.5 (-3.2 to 8.2)                   |
| Peru                                | 58.4 (57.0 to 59.9)        | 71.4 (69.6 to 73.2)        | 71.9 (69.5 to 74.4)        | 77.6 (74.5 to 80.6)        | 0.6 (0.2 to 0.9)                               | 8.8 (3.5 to 14.1)                   |
| <b>Caribbean</b>                    |                            |                            |                            |                            |                                                |                                     |
| Antigua and Barbuda                 | 67.0 (65.9 to 68.3)        | 71.2 (70.0 to 72.5)        | 71.5 (70.0 to 73.1)        | 74.0 (68.6 to 78.2)        | 0.3 (0.3 to 0.7)                               | 3.9 (-3.7 to 10.9)                  |
| The Bahamas                         | 66.3 (65.3 to 67.4)        | 69.4 (68.1 to 70.8)        | 69.5 (67.9 to 71.2)        | 71.5 (68.7 to 74.2)        | 0.2 (-0.1 to 0.5)                              | 3.0 (-1.3 to 7.6)                   |
| Barbados                            | 70.7 (69.7 to 71.8)        | 74.4 (73.0 to 75.7)        | 74.6 (72.9 to 76.2)        | 77.6 (74.6 to 79.9)        | 0.3 (-0.0 to 0.5)                              | 4.3 (-0.0 to 8.4)                   |
| Belize                              | 59.2 (58.0 to 60.4)        | 66.0 (64.7 to 67.3)        | 66.1 (64.6 to 67.5)        | 66.9 (62.9 to 70.5)        | 0.1 (-0.4 to 0.5)                              | 1.4 (-5.2 to 7.0)                   |
| Bermuda                             | 78.7 (77.3 to 80.0)        | 84.8 (83.4 to 86.3)        | 85.3 (82.7 to 88.4)        | 87.7 (82.0 to 88.4)        | 0.1 (-0.2 to 0.3)                              | 1.0 (-3.4 to 4.8)                   |
| Cuba                                | 73.6 (72.6 to 74.5)        | 77.4 (76.6 to 78.2)        | 78.1 (76.2 to 79.8)        | 80.0 (78.0 to 82.0)        | 0.2 (0.0 to 0.4)                               | 3.4 (0.5 to 6.1)                    |
| Dominica                            | 65.0 (63.7 to 66.4)        | 63.9 (62.3 to 65.8)        | 64.1 (59.7 to 65.8)        | 64.1 (59.7 to 65.8)        | 0.0 (-0.5 to 0.5)                              | 0.4 (-6.6 to 7.0)                   |
| Dominican Republic                  | 59.7 (57.9 to 61.3)        | 63.6 (61.4 to 65.8)        | 64.3 (61.4 to 66.8)        | 64.5 (59.6 to 68.3)        | 0.1 (-0.5 to 0.6)                              | 1.4 (-6.9 to 9.0)                   |
| Grenada                             | 64.3 (63.0 to 65.5)        | 67.1 (65.5 to 68.6)        | 67.7 (66.0 to 69.3)        | 72.8 (68.8 to 75.9)        | 0.5 (0.1 to 0.9)                               | 8.5 (2.1 to 14.4)                   |
| Guyana                              | 56.3 (55.0 to 57.4)        | 60.2 (58.7 to 61.6)        | 61.0 (59.0 to 62.9)        | 65.9 (58.1 to 68.6)        | 0.4 (-0.3 to 0.9)                              | 6.2 (-4.2 to 14.7)                  |
| Haiti                               | 36.1 (33.0 to 39.0)        | 46.2 (43.1 to 49.2)        | 47.2 (44.1 to 50.4)        | 54.4 (49.1 to 60.0)        | 1.1 (0.3 to 1.9)                               | 17.8 (4.1 to 32.7)                  |
| Jamaica                             | 68.0 (66.4 to 69.2)        | 70.2 (68.1 to 72.1)        | 70.7 (68.1 to 73.0)        | 71.2 (67.3 to 74.5)        | 0.1 (-0.3 to 0.5)                              | 1.5 (-4.7 to 7.2)                   |
| Puerto Rico                         | 74.9 (73.8 to 76.0)        | 82.6 (81.8 to 83.4)        | 81.7 (80.5 to 82.8)        | 84.5 (83.3 to 85.7)        | 0.2 (0.0 to 0.3)                               | 2.3 (0.6 to 4.0)                    |
| Saint Lucia                         | 64.1 (62.9 to 65.4)        | 68.5 (67.1 to 69.9)        | 68.6 (67.0 to 70.1)        | 71.6 (67.3 to 75.5)        | 0.3 (-0.1 to 0.7)                              | 4.5 (-1.9 to 10.8)                  |
| Saint Vincent and the Grenadines    | 61.5 (60.3 to 62.5)        | 63.7 (62.4 to 64.9)        | 64.2 (62.9 to 65.7)        | 66.2 (62.9 to 69.8)        | 0.3 (-0.1 to 0.7)                              | 4.0 (-1.9 to 10.2)                  |
| Suriname                            | 56.2 (54.6 to 57.6)        | 62.3 (60.7 to 64.0)        | 62.5 (60.6 to 64.4)        | 64.3 (58.3 to 69.5)        | 0.2 (-0.5 to 0.7)                              | 3.2 (-6.9 to 11.6)                  |
| Trinidad and Tobago                 | 60.1 (58.8 to 61.2)        | 67.4 (64.6 to 70.1)        | 67.4 (64.5 to 70.3)        | 67.7 (62.1 to 72.6)        | 0.0 (-0.6 to 0.5)                              | 0.4 (-8.5 to 8.4)                   |
| Virgin Islands, U.S.                | 68.4 (66.4 to 70.2)        | 72.6 (70.4 to 74.8)        | 72.9 (70.6 to 75.5)        | 74.2 (71.5 to 77.1)        | 0.1 (-0.1 to 0.5)                              | 2.3 (-2.2 to 7.3)                   |
| <b>Central Latin America</b>        |                            |                            |                            |                            |                                                |                                     |
| Colombia                            | 66.9 (66.0 to 67.9)        | 74.3 (73.2 to 75.5)        | 74.8 (73.0 to 76.7)        | 78.8 (76.5 to 81.1)        | 0.4 (0.2 to 0.6)                               | 6.1 (2.6 to 9.5)                    |
| Costa Rica                          | 72.0 (71.3 to 72.7)        | 77.0 (76.5 to 77.7)        | 76.7 (75.0 to 77.8)        | 77.2 (75.0 to 79.3)        | 0.0 (-0.2 to 0.2)                              | 0.3 (-2.8 to 3.3)                   |
| El Salvador                         | 62.2 (60.7 to 63.6)        | 69.3 (66.9 to 71.4)        | 70.1 (67.1 to 73.0)        | 71.5 (68.0 to 74.4)        | 0.2 (-0.2 to 0.6)                              | 3.3 (-2.5 to 8.9)                   |
| Guatemala                           | 53.4 (51.3 to 54.7)        | 61.8 (59.8 to 63.3)        | 61.8 (59.3 to 64.1)        | 66.5 (63.3 to 69.2)        | 0.5 (0.1 to 0.8)                               | 7.7 (1.6 to 13.5)                   |
| Honduras                            | 52.4 (49.8 to 55.1)        | 61.8 (59.0 to 64.6)        | 62.7 (60.1 to 65.7)        | 66.6 (62.2 to 70.4)        | 0.5 (-0.0 to 1.0)                              | 7.8 (-0.4 to 15.7)                  |
| Mexico                              | 65.5 (64.7 to 66.2)        | 68.1 (67.3 to 68.7)        | 70.5 (69.7 to 71.2)        | 72.4 (70.8 to 73.8)        | 0.4 (0.3 to 0.6)                               | 6.3 (3.9 to 9.0)                    |
| Nicaragua                           | 57.8 (56.4 to 59.4)        | 70.1 (68.7 to 71.3)        | 71.2 (69.1 to 73.0)        | 74.8 (71.8 to 77.7)        | 0.4 (0.1 to 0.7)                               | 6.8 (1.9 to 11.8)                   |
| Panama                              | 69.8 (68.8 to 70.7)        | 72.7 (71.4 to 74.0)        | 73.8 (72.0 to 75.6)        | 77.9 (75.1 to 82.6)        | 0.5 (0.2 to 0.7)                               | 7.1 (3.0 to 11.3)                   |
| Venezuela                           | 64.5 (63.5 to 65.7)        | 70.8 (69.6 to 72.0)        | 70.9 (68.5 to 73.1)        | 72.8 (66.7 to 77.2)        | 0.2 (-0.4 to 0.6)                              | 2.9 (-6.0 to 9.6)                   |
| <b>Tropical Latin America</b>       |                            |                            |                            |                            |                                                |                                     |
| Brazil                              | 63.1 (62.4 to 63.8)        | 69.9 (69.3 to 70.5)        | 70.0 (69.4 to 70.7)        | 73.2 (69.4 to 75.4)        | 0.3 (-0.0 to 0.5)                              | 4.8 (-0.6 to 7.9)                   |
| Paraguay                            | 59.1 (57.3 to 60.5)        | 68.7 (66.6 to 70.8)        | 69.6 (66.7 to 72.4)        | 73.8 (69.9 to 77.2)        | 0.5 (0.1 to 0.9)                               | 7.5 (0.9 to 14.0)                   |
| <b>North Africa and Middle East</b> |                            |                            |                            |                            |                                                |                                     |
| <b>North Africa and Middle East</b> |                            |                            |                            |                            |                                                |                                     |
| Afghanistan                         | 25.6 (21.8 to 30.1)        | 43.9 (40.7 to 47.3)        | 46.0 (42.6 to 49.5)        | 47.0 (42.6 to 51.9)        | 0.4 (-0.4 to 1.3)                              | 7.0 (-5.5 to 21.2)                  |
| Algeria                             | 62.5 (60.8 to 64.4)        | 71.1 (69.5 to 72.9)        | 72.3 (70.7 to 74.3)        | 73.2 (69.2 to 77.6)        | 0.2 (-0.2 to 0.5)                              | 3.0 (-2.8 to 8.2)                   |
| Bahrain                             | 69.4 (68.3 to 70.5)        | 80.8 (79.5 to 82.2)        | 81.5 (79.9 to 83.0)        | 85.3 (82.2 to 87.7)        | 0.4 (0.1 to 0.6)                               | 5.5 (1.6 to 9.2)                    |
| Egypt                               | 54.9 (52.8 to 56.6)        | 63.4 (61.3 to 65.4)        | 65.2 (62.6 to 67.5)        | 72.1 (68.0 to 75.9)        | 0.9 (0.4 to 1.2)                               | 13.7 (6.9 to 19.9)                  |
| Iran                                | 70.1 (69.0 to 71.4)        | 74.5 (73.1 to 75.6)        | 76.7 (75.3 to 77.9)        | 78.1 (73.6 to 82.0)        | 0.3 (-0.1 to 0.6)                              | 4.9 (-1.3 to 9.9)                   |
| Iraq                                | 56.9 (55.0 to 58.8)        | 69.5 (68.1 to 70.9)        | 71.1 (69.4 to 72.6)        | 75.9 (70.2 to 80.4)        | 0.6 (0.0 to 1.0)                               | 9.2 (0.7 to 15.9)                   |
| Jordan                              | 64.0 (62.4 to 65.8)        | 77.0 (75.2 to 78.6)        | 77.3 (75.4 to 79.2)        | 82.3 (79.6 to 84.9)        | 0.4 (0.2 to 0.7)                               | 7.0 (2.7 to 11.1)                   |
| Kuwait                              | 75.0 (74.3 to 75.7)        | 84.1 (83.2 to 84.8)        | 84.8 (83.5 to 85.9)        | 84.3 (82.8 to 89.6)        | 0.2 (-0.1 to 0.5)                              | 3.8 (-1.6 to 7.1)                   |
| Lebanon                             | 72.2 (70.4 to 74.3)        | 80.9 (78.8 to 82.8)        | 81.2 (79.2 to 83.2)        | 83.7 (79.2 to 87.2)        | 0.2 (-0.1 to 0.5)                              | 3.5 (-2.1 to 8.4)                   |
| Libya                               | 65.7 (63.4 to 67.7)        | 70.8 (68.5 to 73.3)        | 70.6 (68.1 to 73.1)        | 76.1 (72.6 to 79.2)        | 0.5 (0.1 to 0.8)                               | 7.4 (2.1 to 12.6)                   |
| Morocco                             | 49.8 (48.0 to 51.6)        | 60.1 (57.5 to 63.1)        | 61.1 (58.4 to 64.1)        | 64.4 (60.5 to 69.0)        | 0.5 (-0.0 to 0.9)                              | 7.1 (-0.7 to 15.2)                  |
| Palestine                           | 63.2 (61.5 to 64.5)        | 70.7 (69.0 to 72.2)        | 71.8 (70.0 to 73.4)        | 75.7 (73.9 to 77.4)        | 0.5 (0.2 to 0.7)                               | 7.1 (3.7 to 11.1)                   |
| Oman                                | 73.4 (70.9 to 75.9)        | 78.6 (76.5 to 80.8)        | 79.3 (77.3 to 81.5)        | 83.1 (79.8 to 86.3)        | 0.4 (0.1 to 0.7)                               | 5.7 (0.9 to 10.3)                   |
| Qatar                               | 71.7 (69.8 to 73.6)        | 82.5 (80.5 to 84.7)        | 83.7 (81.4 to 85.9)        | 86.2 (81.9 to 89.5)        | 0.3 (-0.1 to 0.6)                              | 4.5 (-1.2 to 9.5)                   |
| Saudi Arabia                        | 68.8 (66.8 to 70.9)        | 77.1 (74.8 to 79.5)        | 77.8 (75.4 to 80.1)        | 78.8 (73.8 to 83.0)        | 0.1 (-0.3 to 0.5)                              | 2.2 (-4.3 to 8.2)                   |
| Sudan                               | 46.7 (42.7 to 51.1)        | 58.8 (55.3 to 62.3)        | 60.5 (57.0 to 63.9)        | 63.7 (57.1 to 70.3)        | 0.5 (-0.3 to 1.2)                              | 8.5 (-4.0 to 20.2)                  |
| Syria                               | 60.3 (59.0 to 61.7)        | 68.5 (66.2 to 70.7)        | 69.9 (67.5 to 72.3)        | 71.9 (66.1 to 76.8)        | 0.3 (-0.2 to 0.8)                              | 5.0 (-3.2 to 12.5)                  |
| Tunisia                             | 69.2 (67.6 to 70.9)        | 78.4 (75.6 to 81.3)        | 79.4 (76.5 to 82.2)        | 81.6 (78.6 to 85.0)        | 0.3 (-0.1 to 0.6)                              | 4.1 (-0.9 to 9.5)                   |
| Turkey                              | 61.0 (59.5 to 62.5)        | 76.3 (75.0 to 77.7)        | 77.8 (76.5 to 79.3)        | 84.2 (81.4 to 86.0)        | 0.7 (0.4 to 0.9)                               | 10.3 (6.3 to 13.9)                  |
| United Arab Emirates                | 65.0 (62.5 to 67.3)        | 67.8 (65.0 to 70.7)        | 69.0 (66.1 to 72.2)        | 72.6 (67.3 to 78.1)        | 0.5 (-0.1 to 0.9)                              | 7.1 (-2.1 to 15.3)                  |
| Yemen                               | 45.5 (41.1 to 50.0)        | 55.8 (51.0 to 60.1)        | 56.2 (51.5 to 60.8)        | 68.0 (63.3 to 72.5)        | 1.3 (0.6 to 2.0)                               | 22.1 (9.3 to 35.6)                  |
| <b>South Asia</b>                   |                            |                            |                            |                            |                                                |                                     |
| <b>South Asia</b>                   |                            |                            |                            |                            |                                                |                                     |
| Bangladesh                          | 40.8 (39.3 to 42.4)        | 58.5 (56.6 to 60.5)        | 59.8 (57.6 to 62.0)        | 71.4 (68.3 to 74.6)        | 1.3 (1.0 to 1.7)                               | 22.1 (15.7 to 28.2)                 |
| Bhutan                              | 46.5 (44.1 to 49.2)        | 62.7 (59.7 to 66.1)        | 64.1 (61.0 to 67.7)        | 71.3 (65.0 to 76.6)        | 0.9 (0.2 to 1.4)                               | 13.9 (2.5 to 23.1)                  |
| India                               | 42.1 (40.8 to 43.3)        | 56.0 (54.8 to 57.2)        | 56.8 (55.5 to 58.0)        | 64.5 (62.5 to 66.5)        | 0.9 (0.6 to 1.2)                               | 15.3 (9.9 to 20.5)                  |

|                                               | Estimate in 2000 (95% UIs) | Estimate in 2015 (95% UIs) | Estimate in 2017 (95% UIs) | Estimate in 2030 (95% UIs) | Annualised rate of change, 2015-2030 (95% UIs) | Percent change, 2015-2030 (95% UIs) |
|-----------------------------------------------|----------------------------|----------------------------|----------------------------|----------------------------|------------------------------------------------|-------------------------------------|
| Nepal                                         | 43.0 (40.7 to 45.2)        | 57.9 (55.4 to 61.1)        | 59.0 (56.5 to 62.2)        | 66.4 (62.1 to 70.8)        | 0.9 (0.4 to 1.4)                               | 14.7 (5.9 to 24.1)                  |
| Pakistan                                      | 37.5 (36.0 to 39.2)        | 49.8 (47.0 to 52.7)        | 51.6 (48.8 to 54.7)        | 61.0 (55.3 to 66.8)        | 1.4 (0.7 to 2.0)                               | 22.7 (11.0 to 34.3)                 |
| <b>Southeast Asia, East Asia, and Oceania</b> |                            |                            |                            |                            |                                                |                                     |
| <b>East Asia</b>                              |                            |                            |                            |                            |                                                |                                     |
| China                                         | 61.9 (60.6 to 63.1)        | 78.3 (77.4 to 79.3)        | 80.4 (79.4 to 81.3)        | 86.2 (84.6 to 87.8)        | 0.6 (0.5 to 0.8)                               | 10.0 (7.5 to 12.6)                  |
| North Korea                                   | 57.2 (54.6 to 60.0)        | 63.8 (61.3 to 66.5)        | 64.7 (62.0 to 67.3)        | 66.7 (64.1 to 69.3)        | 0.3 (-0.1 to 0.7)                              | 4.6 (-1.0 to 10.5)                  |
| Taiwan (Province of China)                    | 79.6 (79.0 to 80.2)        | 86.4 (85.9 to 87.0)        | 86.5 (85.6 to 87.3)        | 88.8 (87.6 to 90.1)        | 0.2 (0.1 to 0.3)                               | 2.8 (1.3 to 4.2)                    |
| <b>Oceania</b>                                |                            |                            |                            |                            |                                                |                                     |
| American Samoa                                | 61.9 (60.5 to 63.2)        | 63.5 (61.7 to 65.2)        | 63.7 (61.6 to 65.6)        | 64.5 (62.4 to 66.5)        | 0.1 (-0.2 to 0.4)                              | 1.7 (-2.7 to 5.9)                   |
| Federated States of Micronesia                | 48.6 (46.3 to 50.9)        | 55.1 (51.8 to 60.4)        | 55.1 (51.5 to 61.4)        | 55.1 (50.6 to 61.9)        | 0.0 (-0.8 to 0.9)                              | 0.3 (-1.6 to 14.1)                  |
| Fiji                                          | 54.4 (52.7 to 55.8)        | 59.4 (56.8 to 62.0)        | 59.9 (57.1 to 63.0)        | 63.9 (59.2 to 69.3)        | 0.5 (-0.0 to 1.0)                              | 7.6 (-0.7 to 16.2)                  |
| Guam                                          | 71.6 (70.2 to 72.9)        | 70.6 (69.2 to 72.0)        | 70.6 (68.9 to 72.2)        | 70.9 (68.9 to 72.1)        | -0.0 (-0.2 to 0.2)                             | -0.1 (-3.0 to 2.9)                  |
| Kiribati                                      | 40.0 (38.1 to 42.1)        | 43.1 (40.5 to 45.9)        | 43.7 (41.0 to 46.6)        | 50.6 (47.0 to 54.5)        | 1.1 (0.5 to 1.6)                               | 17.4 (7.8 to 26.9)                  |
| Marshall Islands                              | 43.1 (41.1 to 45.1)        | 48.5 (46.1 to 51.0)        | 49.3 (46.8 to 51.9)        | 51.0 (43.7 to 56.5)        | 0.3 (-0.8 to 1.1)                              | 5.2 (-10.9 to 18.6)                 |
| Northern Mariana Islands                      | 73.5 (71.8 to 75.2)        | 73.9 (71.9 to 75.9)        | 74.2 (72.3 to 76.1)        | 76.1 (74.2 to 78.0)        | 0.2 (0.0 to 0.4)                               | 3.0 (-0.6 to 6.8)                   |
| Papua New Guinea                              | 42.1 (39.5 to 44.7)        | 46.3 (43.3 to 49.2)        | 46.6 (43.6 to 49.4)        | 46.8 (42.4 to 51.3)        | 0.1 (-0.7 to 0.8)                              | 1.2 (-1.0 to 12.0)                  |
| Samoa                                         | 57.6 (55.2 to 60.0)        | 59.6 (57.5 to 62.2)        | 61.1 (54.5 to 62.8)        | 61.1 (54.4 to 67.8)        | 0.2 (-0.7 to 0.9)                              | 2.6 (-9.4 to 14.1)                  |
| Solomon Islands                               | 50.4 (47.9 to 52.9)        | 54.9 (52.3 to 57.5)        | 55.6 (53.0 to 58.1)        | 60.6 (54.7 to 66.1)        | 0.7 (-0.1 to 1.3)                              | 10.5 (-1.4 to 21.2)                 |
| Tonga                                         | 58.0 (56.4 to 59.6)        | 60.7 (58.3 to 62.3)        | 60.7 (58.3 to 62.3)        | 64.3 (59.0 to 69.6)        | 0.4 (-0.1 to 1.0)                              | 6.9 (-1.9 to 15.4)                  |
| Vanuatu                                       | 47.0 (43.2 to 51.2)        | 45.7 (41.4 to 50.6)        | 46.8 (42.2 to 52.0)        | 45.3 (39.2 to 52.9)        | -0.1 (-1.1 to 1.0)                             | -0.7 (-15.6 to 15.9)                |
| <b>Southeast Asia</b>                         |                            |                            |                            |                            |                                                |                                     |
| Cambodia                                      | 41.1 (39.3 to 43.2)        | 61.1 (58.8 to 63.2)        | 61.9 (59.6 to 64.0)        | 69.7 (65.1 to 73.7)        | 0.9 (0.4 to 1.3)                               | 14.1 (5.6 to 21.9)                  |
| Indonesia                                     | 50.5 (49.5 to 51.6)        | 60.8 (59.6 to 62.0)        | 61.8 (60.5 to 63.1)        | 68.1 (65.7 to 70.9)        | 0.8 (0.5 to 1.0)                               | 12.0 (7.6 to 16.7)                  |
| Laos                                          | 32.0 (29.4 to 34.7)        | 51.9 (49.0 to 55.1)        | 53.0 (50.1 to 56.3)        | 65.9 (61.9 to 70.4)        | 1.6 (1.0 to 2.1)                               | 27.1 (16.9 to 36.7)                 |
| Malaysia                                      | 64.0 (63.1 to 65.3)        | 71.6 (70.4 to 72.8)        | 72.9 (71.1 to 74.7)        | 76.2 (73.7 to 78.5)        | 0.4 (0.2 to 0.6)                               | 6.4 (2.8 to 9.9)                    |
| Maldives                                      | 61.0 (59.6 to 62.6)        | 72.6 (71.4 to 73.9)        | 78.2 (76.8 to 79.5)        | 77.5 (74.8 to 79.5)        | 0.4 (0.2 to 0.7)                               | 6.7 (2.5 to 10.3)                   |
| Mauritius                                     | 68.3 (67.4 to 69.5)        | 71.1 (70.3 to 71.9)        | 71.7 (70.3 to 72.9)        | 72.7 (70.1 to 75.4)        | 0.1 (-0.1 to 0.4)                              | 2.2 (-1.6 to 5.8)                   |
| Myanmar                                       | 45.2 (42.6 to 48.0)        | 56.3 (54.0 to 58.6)        | 58.4 (56.0 to 62.6)        | 59.3 (55.8 to 62.6)        | 0.3 (-0.1 to 0.8)                              | 5.3 (-2.1 to 12.6)                  |
| Philippines                                   | 52.8 (51.7 to 53.9)        | 56.7 (55.3 to 58.1)        | 57.9 (55.8 to 60.0)        | 62.0 (58.6 to 65.3)        | 0.6 (0.2 to 1.0)                               | 9.3 (2.7 to 16.4)                   |
| Sri Lanka                                     | 65.5 (64.5 to 66.5)        | 75.9 (73.7 to 78.0)        | 77.1 (74.3 to 79.8)        | 82.9 (79.6 to 86.0)        | 0.6 (0.3 to 0.9)                               | 9.2 (4.2 to 14.1)                   |
| Seychelles                                    | 63.7 (62.5 to 64.9)        | 68.5 (67.1 to 69.9)        | 69.0 (67.6 to 70.5)        | 75.6 (69.8 to 79.6)        | 0.7 (0.1 to 1.0)                               | 10.5 (2.1 to 16.2)                  |
| Thailand                                      | 66.8 (65.3 to 68.2)        | 76.3 (75.0 to 77.9)        | 76.4 (74.6 to 78.4)        | 80.1 (77.6 to 82.8)        | 0.3 (0.1 to 0.5)                               | 5.0 (1.3 to 8.4)                    |
| Timor-Leste                                   | 35.4 (32.0 to 41.9)        | 53.5 (49.9 to 60.6)        | 54.5 (50.9 to 61.4)        | 62.2 (58.0 to 69.1)        | 1.0 (0.1 to 1.8)                               | 16.5 (2.1 to 30.1)                  |
| Vietnam                                       | 58.8 (57.0 to 60.8)        | 70.8 (68.8 to 73.2)        | 71.7 (69.5 to 74.1)        | 78.5 (75.3 to 81.5)        | 0.7 (0.4 to 1.0)                               | 10.9 (5.7 to 16.1)                  |
| <b>Sub-Saharan Africa</b>                     |                            |                            |                            |                            |                                                |                                     |
| <b>Central Sub-Saharan Africa</b>             |                            |                            |                            |                            |                                                |                                     |
| Angola                                        | 29.1 (25.1 to 33.7)        | 41.7 (37.8 to 45.5)        | 43.2 (39.0 to 47.1)        | 48.0 (40.0 to 56.7)        | 0.9 (-0.2 to 1.9)                              | 15.3 (-3.3 to 33.5)                 |
| Central African Republic                      | 25.2 (21.8 to 29.4)        | 30.3 (26.4 to 34.5)        | 30.3 (26.3 to 34.5)        | 31.7 (26.0 to 38.3)        | 0.3 (-1.2 to 1.9)                              | 5.3 (-16.5 to 32.5)                 |
| Congo                                         | 32.3 (29.0 to 35.8)        | 48.0 (44.1 to 51.6)        | 48.5 (44.6 to 52.4)        | 54.0 (45.9 to 62.1)        | 0.8 (-0.3 to 1.7)                              | 12.7 (-3.9 to 29.1)                 |
| Democratic Republic of the Congo              | 30.9 (27.5 to 34.5)        | 42.6 (39.4 to 45.7)        | 43.9 (40.5 to 47.1)        | 46.2 (39.5 to 54.0)        | 0.5 (-0.5 to 1.5)                              | 8.5 (-7.8 to 25.1)                  |
| Equatorial Guinea                             | 32.5 (27.1 to 38.2)        | 50.8 (43.2 to 58.6)        | 52.2 (45.0 to 60.1)        | 60.4 (50.0 to 69.6)        | 1.2 (-0.3 to 2.5)                              | 19.7 (-4.8 to 46.5)                 |
| Gabon                                         | 41.6 (38.1 to 45.6)        | 55.0 (51.4 to 59.3)        | 56.0 (52.3 to 60.3)        | 59.7 (53.1 to 66.6)        | 0.5 (-0.2 to 1.2)                              | 8.5 (-3.2 to 19.9)                  |
| <b>Eastern Sub-Saharan Africa</b>             |                            |                            |                            |                            |                                                |                                     |
| Burundi                                       | 31.2 (28.1 to 34.8)        | 44.6 (40.7 to 48.5)        | 45.1 (41.3 to 49.2)        | 48.9 (43.2 to 55.3)        | 0.6 (-0.2 to 1.5)                              | 9.7 (-3.4 to 25.1)                  |
| Comoros                                       | 35.2 (31.9 to 38.5)        | 46.0 (42.1 to 49.5)        | 47.4 (43.4 to 51.0)        | 52.6 (44.5 to 59.7)        | 0.9 (-0.2 to 1.7)                              | 14.5 (-2.7 to 29.7)                 |
| Djibouti                                      | 33.2 (27.8 to 38.5)        | 47.0 (40.4 to 53.4)        | 48.9 (42.4 to 55.4)        | 54.5 (45.3 to 62.6)        | 1.0 (-0.4 to 2.2)                              | 16.5 (-6.1 to 40.1)                 |
| Eritrea                                       | 27.0 (24.2 to 30.1)        | 38.7 (35.2 to 42.6)        | 40.4 (37.0 to 44.3)        | 58.7 (53.4 to 64.4)        | 2.8 (2.0 to 3.5)                               | 52.0 (34.6 to 69.9)                 |
| Ethiopia                                      | 19.1 (16.8 to 21.8)        | 41.6 (38.9 to 44.5)        | 44.2 (41.4 to 47.1)        | 56.3 (48.9 to 65.2)        | 2.0 (1.1 to 2.8)                               | 35.4 (18.4 to 51.7)                 |
| Kenya                                         | 44.7 (42.8 to 46.9)        | 52.4 (50.5 to 54.6)        | 53.3 (51.3 to 55.8)        | 56.5 (52.9 to 61.1)        | 0.5 (0.1 to 0.9)                               | 7.8 (1.5 to 14.2)                   |
| Madagascar                                    | 33.9 (31.0 to 37.7)        | 40.5 (37.0 to 44.0)        | 41.6 (38.2 to 45.0)        | 46.8 (40.6 to 53.5)        | 1.0 (-0.1 to 1.9)                              | 15.9 (-1.2 to 33.5)                 |
| Malawi                                        | 42.5 (39.9 to 45.2)        | 52.1 (48.6 to 55.9)        | 52.4 (48.5 to 56.4)        | 53.3 (46.7 to 60.6)        | 0.1 (-0.7 to 0.9)                              | 2.4 (-9.5 to 15.0)                  |
| Mozambique                                    | 34.9 (32.6 to 37.6)        | 44.2 (41.3 to 47.4)        | 45.9 (42.7 to 49.2)        | 48.3 (42.3 to 55.1)        | 0.6 (-0.3 to 1.5)                              | 9.3 (-4.3 to 25.7)                  |
| Rwanda                                        | 27.9 (25.1 to 30.7)        | 49.2 (45.7 to 53.2)        | 50.1 (46.5 to 54.1)        | 58.6 (52.8 to 65.3)        | 1.2 (0.4 to 1.8)                               | 19.1 (6.7 to 31.1)                  |
| Somalia                                       | 17.3 (13.4 to 21.8)        | 24.7 (19.4 to 30.7)        | 25.8 (20.2 to 31.8)        | 26.8 (20.2 to 34.7)        | 0.5 (-1.7 to 2.7)                              | 9.7 (-22.8 to 49.4)                 |
| South Sudan                                   | 19.9 (14.8 to 25.6)        | 31.3 (25.9 to 36.4)        | 30.7 (25.5 to 35.9)        | 39.3 (33.2 to 45.7)        | 1.5 (-0.0 to 2.9)                              | 26.5 (-0.4 to 55.6)                 |
| Tanzania                                      | 42.4 (40.4 to 44.7)        | 49.1 (46.1 to 52.2)        | 50.2 (46.9 to 53.4)        | 54.1 (47.8 to 60.7)        | 0.6 (-0.1 to 1.4)                              | 10.2 (-2.1 to 22.9)                 |
| Uganda                                        | 32.5 (29.6 to 35.4)        | 45.4 (42.3 to 48.6)        | 46.9 (43.8 to 50.3)        | 50.6 (44.6 to 57.9)        | 0.7 (-0.1 to 1.5)                              | 11.6 (-1.1 to 25.4)                 |
| Zambia                                        | 37.7 (35.6 to 39.8)        | 52.5 (49.9 to 55.4)        | 54.0 (51.1 to 57.1)        | 58.0 (52.3 to 64.2)        | 0.7 (-0.1 to 1.3)                              | 10.4 (-0.8 to 22.0)                 |
| <b>Southern Sub-Saharan Africa</b>            |                            |                            |                            |                            |                                                |                                     |
| Botswana                                      | 59.3 (55.2 to 63.8)        | 65.0 (62.3 to 67.4)        | 66.6 (63.7 to 69.1)        | 71.2 (67.0 to 75.0)        | 0.6 (0.1 to 1.1)                               | 9.6 (2.1 to 17.6)                   |
| Lesotho                                       | 41.8 (39.0 to 44.8)        | 46.6 (44.9 to 52.5)        | 46.6 (44.9 to 52.5)        | 57.8 (53.1 to 62.2)        | 1.1 (0.4 to 1.9)                               | 18.9 (6.9 to 32.5)                  |
| Namibia                                       | 44.8 (42.4 to 47.1)        | 59.8 (56.7 to 63.0)        | 61.6 (58.3 to 64.9)        | 67.2 (62.9 to 71.3)        | 0.8 (0.3 to 1.3)                               | 12.4 (4.2 to 21.4)                  |
| South Africa                                  | 50.4 (49.0 to 51.7)        | 64.7 (63.5 to 65.9)        | 65.2 (64.1 to 66.5)        | 67.5 (65.2 to 70.2)        | 0.3 (0.1 to 0.5)                               | 4.4 (0.8 to 8.5)                    |
| Swaziland                                     | 44.6 (41.3 to 47.9)        | 52.5 (48.8 to 56.4)        | 54.7 (51.0 to 58.5)        | 57.9 (52.2 to 63.4)        | 0.6 (-0.2 to 1.4)                              | 10.4 (-3.1 to 24.2)                 |
| Zimbabwe                                      | 43.9 (41.5 to 46.5)        | 49.0 (46.4 to 51.8)        | 50.2 (47.5 to 53.1)        | 52.1 (45.5 to 58.5)        | 0.4 (-0.6 to 1.3)                              | 6.5 (-8.3 to 21.7)                  |
| <b>Western Sub-Saharan Africa</b>             |                            |                            |                            |                            |                                                |                                     |
| Benin                                         | 42.8 (40.3 to 45.3)        | 49.9 (46.9 to 53.2)        | 50.6 (47.2 to 53.9)        | 53.0 (46.9 to 59.5)        | 0.4 (-0.5 to 1.2)                              | 6.2 (-6.8 to 20.1)                  |
| Burkina Faso                                  | 39.6 (37.2 to 42.0)        | 50.7 (47.4 to 53.8)        | 51.1 (47.6 to 54.2)        | 57.1 (51.8 to 62.8)        | 0.8 (0.1 to 1.5)                               | 12.6 (1.2 to 25.6)                  |
| Cameroon                                      | 39.6 (37.3 to 42.0)        | 51.0 (47.6 to 54.6)        | 53.0 (49.6 to 56.7)        | 59.3 (54.0 to 65.0)        | 1.0 (0.3 to 1.7)                               | 16.3 (5.2 to 28.7)                  |
| Cape Verde                                    | 55.2 (53.1 to 57.3)        | 67.8 (66.2 to 69.4)        | 68.2 (66.4 to 70.1)        | 71.9 (66.8 to 76.2)        | 0.4 (-0.1 to 0.8)                              | 6.0 (-1.4 to 13.1)                  |
| Chad                                          | 25.4 (22.8 to 28.1)        | 38.8 (35.8 to 41.8)        | 39.6 (36.4 to 42.8)        | 43.5 (37.3 to 50.1)        | 0.8 (-0.3 to 1.8)                              | 12.3 (-4.7 to 30.5)                 |
| Cote d'Ivoire                                 | 43.3 (40.7 to 45.6)        | 48.9 (46.2 to 51.6)        | 50.3 (47.5 to 53.3)        | 56.8 (53.0 to 60.2)        | 1.0 (0.5 to 1.5)                               | 16.2 (7.0 to 25.1)                  |
| The Gambia                                    | 45.2 (42.4 to 48.0)        | 50.5 (47.5 to 53.3)        | 51.3 (48.2 to 54.3)        | 50.7 (44.2 to 56.7)        | 0.0 (-0.9 to 0.8)                              | 0.5 (-12.2 to 13.5)                 |
| Ghana                                         | 48.4 (46.2 to 50.7)        | 56.2 (53.5 to 59.3)        | 57.1 (54.2 to 60.0)        | 60.9 (54.5 to 66.0)        | 0.5 (-0.2 to 1.2)                              | 8.4 (-3.0 to 19.4)                  |
| Guinea                                        | 28.2 (25.7 to 30.9)        | 34.7 (31.9 to 37.8)        | 35.8 (33.0 to 38.9)        | 39.8 (34.5 to 45.3)        | 0.9 (-0.1 to 1.8)                              | 14.7 (-2.2 to 31.0)                 |
| Guinea-Bissau                                 | 32.1 (29.1 to 35.1)        | 44.4 (41.5 to 47.6)        | 45.0 (42.1 to 48.2)        | 49.8 (44.0 to 57.0)        | 0.7 (-0.1 to 1.8)                              | 12.2 (-2.1 to 30.5)                 |
| Liberia                                       | 38.7 (35.1 to 42.6)        | 50.1 (46.6 to 53.4)        | 51.4 (47.9 to 54.7)        | 54.6 (48.5 to 62.0)        | 0.6 (-0.3 to 1.4)                              | 9.2 (-4.0 to 23.1)                  |
| Mali                                          | 36.4 (33.4 to 39.3)        | 46.5 (43.5 to 49.7)        | 46.6 (43.5 to 50.0)        | 53.1 (46.5 to 59.8)        | 0.9 (-0.1 to 1.7)                              | 14.1 (-1.5 to 29.8)                 |
| Mauritania                                    | 40.6 (38.2 to 43.2)        | 55.0 (52.1 to 57.8)        | 56.1 (53.1 to 59.0)        | 63.8 (57.1 to 70.4)        | 1.0 (0.2 to 1.6)                               | 16.1 (3.5 to 26.9)                  |
| Niger                                         | 28.2 (25.2 to 31.3)        | 47.0 (43.3 to 50.8)        | 46.8 (43.1 to 50.6)        | 57.5 (52.0 to 62.8)        | 1.3 (0.5 to 2.1)                               | 22.6 (8.5 to 36.0)                  |

|                                                                                                                                                | Estimate in 2000 (95% UIs) | Estimate in 2015 (95% UIs) | Estimate in 2017 (95% UIs) | Estimate in 2030 (95% UIs) | Annualised rate of change, 2015-2030 (95% UIs) | Percent change, 2015-2030 (95% UIs) |
|------------------------------------------------------------------------------------------------------------------------------------------------|----------------------------|----------------------------|----------------------------|----------------------------|------------------------------------------------|-------------------------------------|
| Nigeria                                                                                                                                        | 37.6 (32.5 to 42.5)        | 46.7 (40.9 to 52.1)        | 46.4 (40.8 to 51.6)        | 44.9 (35.2 to 57.0)        | -0.3 (-1.9 to 1.2)                             | -3.6 (-25.0 to 19.6)                |
| San Tome and Principe                                                                                                                          | 47.6 (45.5 to 49.6)        | 57.1 (54.6 to 59.5)        | 58.4 (56.0 to 60.7)        | 61.3 (54.6 to 68.7)        | 0.5 (0.4 to 0.2)                               | 7.4 (6.2 to 20.2)                   |
| Senegal                                                                                                                                        | 41.8 (39.8 to 44.0)        | 51.6 (49.2 to 54.1)        | 52.6 (49.9 to 55.3)        | 57.7 (53.1 to 62.4)        | 0.7 (0.1 to 1.3)                               | 11.7 (2.1 to 21.2)                  |
| Sierra Leone                                                                                                                                   | 35.3 (31.6 to 39.1)        | 47.7 (44.4 to 51.1)        | 49.5 (46.0 to 52.7)        | 53.2 (47.4 to 58.5)        | 0.7 (-0.1 to 1.5)                              | 11.7 (-1.7 to 25.4)                 |
| Togo                                                                                                                                           | 41.5 (38.9 to 44.1)        | 51.9 (48.8 to 55.4)        | 53.3 (50.2 to 56.8)        | 56.6 (50.2 to 62.6)        | 0.6 (-0.2 to 1.4)                              | 9.1 (-3.4 to 22.7)                  |
| <b>Indicator 3.9.1: Age-standardised death rate attributable to household air pollution and ambient air pollution (per 100,000 population)</b> |                            |                            |                            |                            |                                                |                                     |
| <b>Central Europe, Eastern Europe, and Central Asia</b>                                                                                        |                            |                            |                            |                            |                                                |                                     |
| Central Asia                                                                                                                                   |                            |                            |                            |                            |                                                |                                     |
| Armenia                                                                                                                                        | 77.6 (64.6 to 91.2)        | 54.5 (42.9 to 66.5)        | 52.3 (40.4 to 64.9)        | 39.1 (24.9 to 55.8)        | -2.3 (-4.8 to 0.0)                             | -27.9 (-51.6 to 0.2)                |
| Azerbaijan                                                                                                                                     | 92.9 (71.9 to 115.4)       | 67.4 (47.7 to 88.0)        | 64.5 (47.7 to 85.6)        | 51.3 (26.6 to 85.6)        | -2.0 (-6.2 to 2.1)                             | -22.4 (-60.6 to 36.1)               |
| Georgia                                                                                                                                        | 73.2 (61.9 to 84.3)        | 57.5 (46.1 to 68.8)        | 58.0 (47.4 to 69.4)        | 51.5 (36.0 to 69.8)        | -0.8 (-2.9 to 1.3)                             | -10.2 (-35.5 to 21.4)               |
| Kazakhstan                                                                                                                                     | 72.3 (53.8 to 106.4)       | 42.6 (23.9 to 64.5)        | 39.9 (11.5 to 63.8)        | 29.0 (5.2 to 57.8)         | -3.1 (-13.9 to 6.3)                            | -20.7 (-87.5 to 156.7)              |
| Kyrgyzstan                                                                                                                                     | 96.2 (74.3 to 124.6)       | 60.6 (44.5 to 80.3)        | 55.3 (40.4 to 73.6)        | 38.1 (21.5 to 63.1)        | -3.3 (-6.6 to 0.2)                             | -36.9 (-63.1 to 2.8)                |
| Mongolia                                                                                                                                       | 142.3 (114.5 to 168.8)     | 72.7 (53.1 to 88.9)        | 69.8 (50.2 to 85.4)        | 46.5 (26.2 to 64.8)        | -3.1 (-6.3 to -0.4)                            | -35.6 (-61.4 to -6.4)               |
| Tajikistan                                                                                                                                     | 105.7 (89.1 to 123.2)      | 82.8 (62.4 to 102.0)       | 81.1 (62.4 to 102.2)       | 68.2 (40.9 to 102.2)       | -1.4 (-4.6 to 1.6)                             | -16.9 (-50.1 to 27.6)               |
| Turkmenistan                                                                                                                                   | 78.5 (44.0 to 112.8)       | 56.9 (30.4 to 81.0)        | 54.6 (30.6 to 76.0)        | 41.5 (17.4 to 74.0)        | -2.4 (-8.1 to 2.9)                             | -20.8 (-70.4 to 55.1)               |
| Uzbekistan                                                                                                                                     | 99.0 (67.5 to 129.1)       | 91.8 (57.6 to 123.2)       | 86.5 (54.1 to 116.8)       | 78.8 (36.4 to 132.4)       | -1.3 (-6.4 to 3.1)                             | -11.4 (-61.5 to 58.7)               |
| <b>Central Europe</b>                                                                                                                          |                            |                            |                            |                            |                                                |                                     |
| Albania                                                                                                                                        | 55.4 (47.6 to 63.2)        | 34.7 (28.1 to 42.4)        | 33.0 (26.1 to 40.8)        | 24.2 (15.7 to 35.5)        | -2.5 (-4.7 to -0.3)                            | -30.4 (-50.9 to -4.0)               |
| Bosnia and Herzegovina                                                                                                                         | 59.4 (49.8 to 69.9)        | 51.0 (41.6 to 60.2)        | 48.4 (38.9 to 57.1)        | 41.4 (28.6 to 54.1)        | -1.4 (-3.7 to 0.4)                             | -18.6 (-42.2 to 6.4)                |
| Bulgaria                                                                                                                                       | 64.5 (53.7 to 75.3)        | 43.0 (35.0 to 51.3)        | 41.0 (33.0 to 49.6)        | 30.6 (20.6 to 42.2)        | -2.4 (-5.1 to 0.3)                             | -28.5 (-53.4 to 5.4)                |
| Croatia                                                                                                                                        | 42.1 (33.8 to 50.9)        | 29.1 (22.7 to 36.1)        | 25.9 (20.0 to 31.9)        | 18.0 (10.9 to 27.1)        | -3.3 (-6.4 to -0.5)                            | -37.8 (-61.7 to -7.5)               |
| Czech Republic                                                                                                                                 | 37.5 (29.4 to 48.1)        | 25.1 (19.7 to 32.0)        | 23.3 (18.2 to 30.6)        | 16.3 (10.3 to 25.7)        | -3.0 (-5.9 to -0.1)                            | -34.6 (-58.7 to -1.7)               |
| Hungary                                                                                                                                        | 46.1 (39.2 to 53.5)        | 33.8 (27.7 to 40.8)        | 29.5 (23.8 to 35.5)        | 20.5 (14.6 to 27.2)        | -3.4 (-5.4 to -1.4)                            | -39.1 (-55.7 to -18.4)              |
| Macedonia                                                                                                                                      | 64.4 (54.5 to 75.6)        | 43.4 (35.9 to 52.1)        | 42.0 (34.6 to 50.6)        | 31.0 (22.8 to 40.4)        | -2.3 (-3.9 to -0.7)                            | -28.6 (-44.3 to -9.8)               |
| Montenegro                                                                                                                                     | 52.2 (44.5 to 60.5)        | 41.1 (34.8 to 48.1)        | 39.8 (33.0 to 47.2)        | 33.9 (24.4 to 44.6)        | -1.3 (-3.1 to 0.5)                             | -17.4 (-37.4 to 7.0)                |
| Poland                                                                                                                                         | 45.5 (35.5 to 54.5)        | 29.8 (21.7 to 37.5)        | 27.3 (20.1 to 34.2)        | 18.6 (10.9 to 27.2)        | -3.2 (-6.6 to -0.3)                            | -36.9 (-62.7 to -4.3)               |
| Romania                                                                                                                                        | 57.5 (47.3 to 68.5)        | 34.0 (26.6 to 41.4)        | 32.4 (25.1 to 39.7)        | 21.8 (13.5 to 29.7)        | -3.1 (-5.9 to -0.8)                            | -35.8 (-58.7 to -10.9)              |
| Serbia                                                                                                                                         | 72.0 (61.0 to 81.8)        | 56.5 (47.8 to 66.1)        | 51.6 (42.7 to 60.5)        | 41.7 (30.2 to 54.6)        | -2.1 (-4.1 to -0.3)                            | -25.9 (-45.9 to -3.8)               |
| Slovakia                                                                                                                                       | 46.5 (39.4 to 54.1)        | 30.5 (25.3 to 35.9)        | 27.9 (23.2 to 33.2)        | 18.9 (13.6 to 25.4)        | -3.2 (-5.3 to -1.1)                            | -37.7 (-54.7 to -15.4)              |
| Slovenia                                                                                                                                       | 31.2 (25.5 to 37.0)        | 16.2 (13.0 to 19.7)        | 15.3 (12.1 to 18.7)        | 9.3 (6.3 to 12.5)          | -3.8 (-6.1 to -1.7)                            | -42.4 (-59.8 to -21.9)              |
| <b>Eastern Europe</b>                                                                                                                          |                            |                            |                            |                            |                                                |                                     |
| Belarus                                                                                                                                        | 61.5 (48.7 to 76.8)        | 41.7 (32.5 to 51.6)        | 40.0 (31.1 to 50.9)        | 29.5 (18.1 to 44.1)        | -2.4 (-5.3 to 0.3)                             | -29.0 (-55.1 to 4.7)                |
| Estonia                                                                                                                                        | 33.8 (26.1 to 41.4)        | 12.4 (7.4 to 17.4)         | 11.7 (6.6 to 16.7)         | 5.8 (2.4 to 10.5)          | -5.3 (-10.5 to -0.9)                           | -51.9 (-79.3 to -13.1)              |
| Latvia                                                                                                                                         | 44.6 (34.8 to 56.0)        | 28.6 (21.6 to 37.1)        | 27.4 (20.0 to 36.6)        | 18.4 (10.7 to 28.3)        | -3.1 (-6.0 to -0.7)                            | -35.7 (-59.6 to -9.9)               |
| Lithuania                                                                                                                                      | 34.5 (28.4 to 41.5)        | 26.9 (21.6 to 33.1)        | 25.6 (19.7 to 31.8)        | 19.1 (12.1 to 26.8)        | -2.4 (-4.7 to -0.1)                            | -29.0 (-50.5 to -1.5)               |
| Moldova                                                                                                                                        | 78.6 (66.8 to 91.3)        | 44.6 (35.4 to 53.9)        | 39.6 (31.1 to 48.9)        | 24.8 (15.3 to 34.6)        | -4.0 (-7.3 to -1.4)                            | -44.0 (-66.5 to -18.4)              |
| Russia                                                                                                                                         | 59.9 (50.2 to 69.6)        | 36.5 (30.0 to 43.1)        | 33.8 (27.6 to 39.4)        | 21.7 (16.3 to 26.6)        | -3.5 (-4.8 to -2.3)                            | -40.6 (-51.3 to -29.0)              |
| Ukraine                                                                                                                                        | 70.9 (49.8 to 92.4)        | 56.5 (39.5 to 75.7)        | 50.6 (35.1 to 68.2)        | 39.8 (19.8 to 70.6)        | -2.6 (-7.4 to 1.9)                             | -27.8 (-66.9 to 33.2)               |
| <b>High-income</b>                                                                                                                             |                            |                            |                            |                            |                                                |                                     |
| Australia                                                                                                                                      | 15.2 (6.7 to 25.1)         | 8.6 (1.8 to 15.8)          | 8.1 (1.7 to 15.3)          | 5.5 (0.7 to 12.5)          | -3.6 (-11.8 to 2.2)                            | -34.3 (-82.8 to 39.0)               |
| New Zealand                                                                                                                                    | 13.2 (5.0 to 20.2)         | 7.0 (2.0 to 11.9)          | 6.3 (1.4 to 11.3)          | 4.1 (0.6 to 9.3)           | -4.3 (-14.7 to 3.7)                            | -34.2 (-89.0 to 74.0)               |
| <b>High-income Asia Pacific</b>                                                                                                                |                            |                            |                            |                            |                                                |                                     |
| Brunei                                                                                                                                         | 25.8 (8.9 to 39.1)         | 18.8 (5.5 to 31.2)         | 15.8 (3.5 to 28.1)         | 11.8 (1.9 to 25.4)         | -3.8 (-12.1 to 3.8)                            | -33.4 (-83.8 to 77.8)               |
| Japan                                                                                                                                          | 13.9 (11.6 to 16.6)        | 9.1 (7.5 to 11.1)          | 8.6 (7.0 to 10.6)          | 5.8 (4.7 to 7.5)           | -3.0 (-3.7 to -2.3)                            | -36.1 (-43.0 to -29.1)              |
| South Korea                                                                                                                                    | 33.7 (28.4 to 38.9)        | 19.3 (15.5 to 23.0)        | 17.6 (14.1 to 21.1)        | 11.9 (8.1 to 16.2)         | -3.3 (-5.4 to -1.3)                            | -38.2 (-55.6 to -17.4)              |
| Singapore                                                                                                                                      | 32.0 (24.1 to 40.3)        | 18.3 (13.0 to 21.2)        | 16.7 (11.6 to 21.2)        | 10.9 (5.9 to 15.9)         | -3.6 (-6.7 to -0.7)                            | -40.0 (-63.3 to -10.0)              |
| <b>High-income North America</b>                                                                                                               |                            |                            |                            |                            |                                                |                                     |
| Canada                                                                                                                                         | 14.5 (6.9 to 20.4)         | 8.3 (2.2 to 12.8)          | 7.1 (1.6 to 11.4)          | 4.6 (0.8 to 9.3)           | -4.5 (-14.4 to 4.2)                            | -17.0 (-88.4 to 88.5)               |
| Greenland                                                                                                                                      | 40.2 (20.3 to 62.2)        | 24.9 (8.3 to 41.0)         | 23.9 (8.0 to 39.8)         | 17.6 (4.0 to 38.7)         | -2.9 (-12.8 to 5.9)                            | -17.7 (-85.4 to 142.7)              |
| United States                                                                                                                                  | 20.3 (16.1 to 24.4)        | 12.8 (9.5 to 16.1)         | 11.8 (8.5 to 15.3)         | 7.8 (5.0 to 10.8)          | -3.4 (-5.0 to -2.3)                            | -39.6 (-52.7 to -29.6)              |
| <b>Southern Latin America</b>                                                                                                                  |                            |                            |                            |                            |                                                |                                     |
| Argentina                                                                                                                                      | 35.3 (21.6 to 52.6)        | 26.9 (14.1 to 46.0)        | 25.0 (11.6 to 41.0)        | 20.4 (6.3 to 44.3)         | -2.3 (-10.4 to 5.0)                            | -13.6 (-79.0 to 112.1)              |
| Chile                                                                                                                                          | 32.8 (23.0 to 39.7)        | 20.7 (13.5 to 25.9)        | 20.1 (13.1 to 25.7)        | 14.3 (6.7 to 21.4)         | -2.6 (-6.8 to 0.9)                             | -29.8 (-63.8 to 14.1)               |
| Uruguay                                                                                                                                        | 24.1 (15.5 to 34.4)        | 16.0 (7.8 to 24.8)         | 15.5 (8.4 to 23.7)         | 11.8 (4.5 to 23.7)         | -2.3 (-8.9 to 4.4)                             | -20.4 (-73.8 to 93.5)               |
| <b>Western Europe</b>                                                                                                                          |                            |                            |                            |                            |                                                |                                     |
| Andorra                                                                                                                                        | 15.1 (11.3 to 20.8)        | 11.6 (8.3 to 16.5)         | 10.6 (7.3 to 15.3)         | 8.1 (4.3 to 13.8)          | -2.6 (-5.9 to -0.1)                            | -30.6 (-58.7 to -1.0)               |
| Austria                                                                                                                                        | 21.9 (16.4 to 26.5)        | 13.8 (10.0 to 17.1)        | 12.7 (9.0 to 16.2)         | 8.6 (4.8 to 12.7)          | -3.3 (-6.5 to -0.5)                            | -37.3 (-62.3 to -6.8)               |
| Belgium                                                                                                                                        | 24.5 (18.5 to 30.0)        | 15.1 (10.8 to 19.3)        | 14.0 (10.0 to 18.0)        | 9.3 (5.3 to 13.3)          | -3.3 (-6.3 to -0.7)                            | -37.8 (-61.0 to -9.8)               |
| Cyprus                                                                                                                                         | 38.0 (31.1 to 45.2)        | 21.2 (16.9 to 25.9)        | 19.7 (15.4 to 24.1)        | 12.8 (8.8 to 17.4)         | -3.4 (-5.3 to -1.4)                            | -39.3 (-54.7 to -19.5)              |
| Denmark                                                                                                                                        | 23.0 (17.6 to 28.8)        | 14.1 (9.9 to 18.3)         | 13.6 (9.4 to 18.1)         | 9.3 (4.8 to 14.3)          | -3.0 (-6.7 to 0.0)                             | -33.9 (-63.3 to -0.5)               |
| Finland                                                                                                                                        | 13.9 (3.4 to 19.5)         | 6.0 (1.4 to 9.0)           | 5.8 (1.3 to 9.0)           | 3.8 (0.6 to 6.6)           | -4.1 (-12.7 to 3.9)                            | -27.6 (-85.0 to 79.8)               |
| France                                                                                                                                         | 15.5 (11.5 to 19.7)        | 9.8 (6.8 to 12.7)          | 8.9 (6.2 to 11.7)          | 5.9 (3.2 to 8.8)           | -3.5 (-7.0 to -0.6)                            | -38.8 (-65.0 to -9.2)               |
| Germany                                                                                                                                        | 22.4 (18.1 to 27.8)        | 15.0 (11.1 to 18.9)        | 14.4 (10.7 to 18.6)        | 10.5 (6.3 to 15.7)         | -2.5 (-5.4 to 0.3)                             | -29.4 (-55.2 to 4.5)                |
| Greece                                                                                                                                         | 27.2 (21.1 to 34.5)        | 20.4 (14.8 to 27.3)        | 19.3 (13.9 to 25.4)        | 15.2 (8.7 to 23.9)         | -2.1 (-5.4 to 1.4)                             | -24.8 (-55.5 to 22.8)               |
| Iceland                                                                                                                                        | 12.6 (6.2 to 22.1)         | 7.2 (2.5 to 14.0)          | 6.4 (2.2 to 13.4)          | 4.5 (0.9 to 13.2)          | -3.8 (-11.5 to 4.0)                            | -30.6 (-82.2 to 82.7)               |
| Ireland                                                                                                                                        | 25.8 (19.5 to 32.8)        | 11.4 (7.7 to 14.9)         | 10.5 (7.3 to 14.0)         | 5.9 (3.1 to 9.0)           | -4.5 (-8.1 to -1.4)                            | -47.5 (-70.3 to -19.1)              |
| Israel                                                                                                                                         | 30.5 (23.7 to 37.0)        | 18.3 (13.7 to 24.5)        | 16.9 (12.6 to 22.6)        | 11.7 (7.1 to 19.6)         | -3.1 (-6.2 to 0.3)                             | -35.8 (-60.4 to 4.0)                |
| Italy                                                                                                                                          | 20.6 (14.4 to 27.2)        | 14.1 (9.4 to 18.9)         | 12.6 (8.1 to 17.1)         | 9.0 (4.4 to 14.7)          | -3.2 (-6.9 to 0.8)                             | -35.0 (-64.7 to 12.6)               |
| Luxembourg                                                                                                                                     | 20.2 (15.7 to 24.5)        | 12.1 (8.9 to 15.2)         | 11.2 (8.2 to 10.4)         | 7.2 (4.3 to 10.4)          | -3.6 (-6.2 to -1.2)                            | -40.4 (-60.5 to -16.3)              |
| Malta                                                                                                                                          | 28.3 (22.6 to 33.7)        | 18.3 (14.6 to 22.1)        | 18.2 (14.2 to 22.4)        | 13.6 (9.5 to 18.3)         | -2.0 (-3.7 to -0.5)                            | -25.8 (-43.2 to -7.2)               |
| Netherlands                                                                                                                                    | 26.1 (21.0 to 31.4)        | 14.1 (11.0 to 17.6)        | 13.5 (10.3 to 16.9)        | 8.7 (5.6 to 12.2)          | -3.3 (-5.9 to -1.1)                            | -38.4 (-58.6 to -15.3)              |
| Norway                                                                                                                                         | 15.7 (12.4 to 19.1)        | 7.7 (5.5 to 10.2)          | 7.3 (5.0 to 9.7)           | 4.1 (2.4 to 6.0)           | -4.3 (-6.1 to -2.9)                            | -47.5 (-60.2 to -35.4)              |
| Portugal                                                                                                                                       | 23.9 (14.7 to 32.9)        | 11.8 (5.3 to 17.5)         | 11.1 (4.6 to 16.8)         | 6.8 (1.9 to 12.1)          | -4.1 (-11.0 to 1.0)                            | -41.1 (-80.9 to 16.0)               |
| Spain                                                                                                                                          | 17.8 (12.5 to 23.1)        | 10.8 (6.7 to 14.4)         | 9.6 (5.8 to 13.4)          | 6.3 (2.8 to 10.3)          | -3.8 (-8.5 to 0.2)                             | -40.2 (-72.1 to 3.4)                |
| Sweden                                                                                                                                         | 12.8 (6.6 to 18.0)         | 6.7 (2.5 to 11.2)          | 6.4 (2.2 to 10.5)          | 4.3 (1.1 to 8.3)           | -3.4 (-10.9 to 3.4)                            | -31.4 (-80.6 to 67.5)               |
| Switzerland                                                                                                                                    | 16.6 (12.4 to 20.7)        | 9.1 (6.6 to 11.8)          | 8.2 (5.8 to 10.7)          | 4.9 (2.9 to 7.4)           | -4.3 (-7.4 to -1.3)                            | -46.1 (-67.0 to -17.6)              |
| United Kingdom                                                                                                                                 | 24.2 (20.4 to 28.4)        | 13.4 (10.8 to 16.6)        | 13.0 (10.4 to 16.1)        | 8.4 (6.3 to 10.9)          | -3.1 (-3.8 to -2.6)                            | -37.5 (-43.8 to -32.3)              |
| <b>Latin America and Caribbean</b>                                                                                                             |                            |                            |                            |                            |                                                |                                     |

|                                               | Estimate in 2000 (95% UIs) | Estimate in 2015 (95% UIs) | Estimate in 2017 (95% UIs) | Estimate in 2030 (95% UIs) | Annualised rate of change, 2015-2030 (95% UIs) | Percent change, 2015-2030 (95% UIs) |
|-----------------------------------------------|----------------------------|----------------------------|----------------------------|----------------------------|------------------------------------------------|-------------------------------------|
| <b>Andean Latin America</b>                   |                            |                            |                            |                            |                                                |                                     |
| Bolivia                                       | 81.8 (65.3 to 100.2)       | 48.7 (33.1 to 64.4)        | 46.1 (30.6 to 64.3)        | 32.5 (15.0 to 57.1)        | -3.0 (-7.2 to 1.2)                             | -32.7 (-46.2 to 20.4)               |
| Ecuador                                       | 31.7 (23.6 to 40.2)        | 24.0 (15.9 to 31.2)        | 23.1 (14.8 to 30.5)        | 17.9 (8.6 to 28.9)         | -2.2 (-4.1 to 1.8)                             | -24.5 (-59.8 to 31.8)               |
| Peru                                          | 49.5 (39.0 to 59.8)        | 28.9 (20.5 to 37.3)        | 27.0 (18.1 to 36.4)        | 17.5 (8.6 to 28.4)         | -3.6 (-7.6 to -0.2)                            | -39.1 (-68.2 to -2.6)               |
| <b>Caribbean</b>                              |                            |                            |                            |                            |                                                |                                     |
| Antigua and Barbuda                           | 39.6 (28.9 to 50.5)        | 29.9 (20.7 to 38.5)        | 28.8 (18.9 to 37.5)        | 23.4 (11.9 to 36.9)        | -1.8 (-5.7 to 1.5)                             | -21.0 (-57.5 to 26.0)               |
| The Bahamas                                   | 35.5 (23.3 to 47.3)        | 28.7 (18.2 to 39.2)        | 27.4 (16.6 to 37.5)        | 22.6 (9.3 to 39.1)         | -1.9 (-7.3 to 2.8)                             | -19.2 (-66.4 to 53.2)               |
| Barbados                                      | 41.9 (30.6 to 51.3)        | 32.4 (20.6 to 41.4)        | 31.5 (22.4 to 40.3)        | 26.0 (14.4 to 40.3)        | -1.6 (-5.1 to 1.9)                             | -18.8 (-53.7 to 33.9)               |
| Belize                                        | 61.0 (42.1 to 79.3)        | 40.0 (26.9 to 52.6)        | 38.4 (25.5 to 50.7)        | 29.7 (13.5 to 48.9)        | -2.2 (-7.2 to 2.3)                             | -23.5 (-66.1 to 41.3)               |
| Bermuda                                       | 24.3 (17.9 to 30.7)        | 14.6 (10.2 to 18.9)        | 13.9 (9.4 to 18.3)         | 9.4 (-3.8 to 13.1)         | -3.0 (-3.8 to -2.3)                            | -35.7 (-43.5 to -28.9)              |
| Cuba                                          | 36.2 (31.1 to 50.0)        | 27.5 (14.6 to 39.1)        | 26.3 (14.1 to 37.8)        | 21.3 (7.5 to 39.2)         | -2.1 (-3.8 to -0.4)                            | -18.4 (-73.3 to 33.4)               |
| Dominica                                      | 41.0 (32.2 to 49.4)        | 34.5 (25.5 to 43.0)        | 33.4 (23.9 to 42.0)        | 29.2 (15.7 to 44.5)        | -1.3 (-4.6 to 1.8)                             | -15.2 (-50.0 to 30.1)               |
| Dominican Republic                            | 29.8 (20.6 to 38.6)        | 32.2 (19.3 to 43.7)        | 30.3 (17.0 to 42.4)        | 29.1 (11.2 to 51.4)        | -1.0 (-7.2 to 4.1)                             | -6.6 (-66.0 to 84.5)                |
| Grenada                                       | 51.7 (39.4 to 64.6)        | 45.2 (33.0 to 57.4)        | 43.4 (30.3 to 55.6)        | 37.6 (21.0 to 58.6)        | -1.4 (-5.1 to 1.8)                             | -16.2 (-53.2 to 31.9)               |
| Guyana                                        | 73.9 (51.9 to 94.6)        | 58.7 (38.7 to 78.2)        | 55.3 (35.9 to 74.7)        | 45.8 (21.6 to 76.2)        | -1.9 (-6.7 to 2.7)                             | -19.8 (-63.1 to 50.3)               |
| Haiti                                         | 147.4 (127.3 to 168.8)     | 112.9 (92.8 to 133.7)      | 108.5 (89.8 to 129.1)      | 87.8 (65.3 to 113.9)       | -1.7 (-3.1 to -0.3)                            | -22.2 (-37.5 to -4.4)               |
| Jamaica                                       | 40.5 (31.3 to 49.3)        | 36.1 (25.5 to 45.8)        | 36.1 (24.1 to 46.6)        | 36.6 (19.4 to 55.4)        | -0.1 (-3.0 to 2.3)                             | 1.0 (-36.2 to 40.7)                 |
| Puerto Rico                                   | 22.7 (11.3 to 31.9)        | 13.4 (4.2 to 20.1)         | 13.5 (3.4 to 20.9)         | 9.5 (1.6 to 16.1)          | -2.7 (-6.7 to -1.2)                            | -32.2 (-63.4 to -15.9)              |
| Saint Lucia                                   | 49.3 (38.0 to 58.9)        | 35.5 (26.3 to 43.6)        | 35.0 (25.8 to 43.6)        | 26.9 (15.5 to 39.8)        | -2.0 (-5.1 to 1.0)                             | -23.3 (-53.4 to 15.9)               |
| Saint Vincent and the Grenadines              | 61.0 (48.9 to 71.9)        | 44.8 (33.4 to 56.1)        | 43.3 (32.6 to 54.8)        | 35.6 (20.9 to 52.6)        | -1.7 (-5.0 to 1.2)                             | -20.0 (-52.9 to 19.7)               |
| Suriname                                      | 53.7 (39.9 to 67.9)        | 44.3 (29.4 to 57.0)        | 42.5 (29.7 to 55.4)        | 36.6 (18.0 to 60.2)        | -1.5 (-6.0 to 2.5)                             | -16.0 (-59.3 to 46.3)               |
| Trinidad and Tobago                           | 65.7 (46.6 to 81.8)        | 44.8 (28.6 to 59.1)        | 45.9 (29.2 to 62.2)        | 36.5 (17.0 to 61.6)        | -1.6 (-6.2 to 2.5)                             | -17.5 (-60.4 to 46.5)               |
| Virgin Islands, U.S.                          | 30.5 (19.8 to 40.9)        | 25.6 (14.4 to 35.7)        | 24.4 (12.2 to 35.0)        | 21.1 (8.5 to 31.9)         | -1.4 (-3.3 to -0.3)                            | -18.8 (-59.1 to -4.5)               |
| <b>Central Latin America</b>                  |                            |                            |                            |                            |                                                |                                     |
| Colombia                                      | 33.6 (24.6 to 43.2)        | 18.5 (11.7 to 25.1)        | 17.5 (10.1 to 25.2)        | 11.1 (4.4 to 19.9)         | -3.8 (-9.1 to 1.3)                             | -38.5 (-74.3 to 21.8)               |
| Costa Rica                                    | 25.6 (20.3 to 30.4)        | 16.3 (12.2 to 19.8)        | 16.3 (12.3 to 20.3)        | 13.3 (8.1 to 18.3)         | -1.5 (-4.0 to 0.6)                             | -18.4 (-45.0 to 9.9)                |
| El Salvador                                   | 49.0 (42.1 to 56.7)        | 42.4 (34.0 to 51.1)        | 39.6 (30.7 to 50.0)        | 33.8 (20.5 to 51.7)        | -1.7 (-4.5 to 1.1)                             | -20.1 (-49.0 to 18.0)               |
| Guatemala                                     | 107.3 (92.6 to 121.3)      | 61.1 (51.5 to 70.9)        | 60.1 (49.6 to 69.9)        | 42.2 (29.8 to 55.5)        | -2.5 (-4.4 to -0.8)                            | -30.8 (-80.0 to -11.5)              |
| Honduras                                      | 61.7 (49.7 to 73.5)        | 45.6 (36.3 to 55.6)        | 43.1 (34.0 to 52.5)        | 34.5 (22.8 to 47.8)        | -1.9 (-4.0 to -0.1)                            | -24.5 (-44.9 to -1.6)               |
| Mexico                                        | 42.4 (34.7 to 48.3)        | 36.6 (28.5 to 42.6)        | 36.0 (28.5 to 41.6)        | 31.6 (23.5 to 38.0)        | -1.0 (-1.8 to -0.3)                            | -13.8 (-24.2 to -3.7)               |
| Nicaragua                                     | 46.2 (40.0 to 52.0)        | 31.9 (25.8 to 37.4)        | 28.8 (22.8 to 34.5)        | 19.7 (12.8 to 26.7)        | -3.3 (-5.7 to -1.3)                            | -38.3 (-57.7 to -38.0)              |
| Panama                                        | 25.1 (19.4 to 30.7)        | 19.3 (13.5 to 24.9)        | 17.9 (10.9 to 23.7)        | 13.5 (5.9 to 21.1)         | -2.6 (-6.7 to 0.4)                             | -29.8 (-63.6 to 6.8)                |
| Venezuela                                     | 33.2 (20.2 to 45.2)        | 30.7 (18.4 to 42.6)        | 28.4 (14.9 to 40.3)        | 24.7 (8.5 to 45.1)         | -1.8 (-8.5 to 3.5)                             | -15.3 (-72.2 to 67.9)               |
| <b>Tropical Latin America</b>                 |                            |                            |                            |                            |                                                |                                     |
| Brazil                                        | 41.6 (35.0 to 48.1)        | 25.4 (20.5 to 48.1)        | 24.2 (19.4 to 29.2)        | 16.3 (11.6 to 21.3)        | -3.0 (-4.6 to -1.6)                            | -35.9 (-49.5 to -21.2)              |
| Paraguay                                      | 48.8 (40.6 to 56.4)        | 38.8 (29.5 to 47.5)        | 36.0 (26.6 to 45.6)        | 27.9 (16.0 to 43.0)        | -2.4 (-5.6 to 0.5)                             | -27.9 (-56.9 to 8.5)                |
| <b>North Africa and Middle East</b>           |                            |                            |                            |                            |                                                |                                     |
| <b>North Africa and Middle East</b>           |                            |                            |                            |                            |                                                |                                     |
| Afghanistan                                   | 259.1 (217.8 to 300.6)     | 171.3 (147.5 to 197.2)     | 163.7 (140.5 to 189.3)     | 120.8 (93.1 to 152.9)      | -2.4 (-3.9 to -0.9)                            | -29.4 (-43.9 to -12.6)              |
| Algeria                                       | 46.4 (32.0 to 62.7)        | 36.2 (23.9 to 49.5)        | 35.8 (22.9 to 49.1)        | 29.9 (14.1 to 53.0)        | -1.5 (-6.6 to 3.3)                             | -15.1 (-63.0 to 64.4)               |
| Bahrain                                       | 95.7 (61.5 to 108.0)       | 57.4 (45.0 to 65.4)        | 55.0 (43.4 to 63.1)        | 37.4 (26.1 to 46.9)        | -2.9 (-4.3 to -1.5)                            | -35.0 (-47.5 to -20.1)              |
| Egypt                                         | 98.8 (75.9 to 122.3)       | 97.6 (70.7 to 120.4)       | 98.8 (69.3 to 121.9)       | 94.5 (51.3 to 145.7)       | 0.4 (-4.4 to 3.0)                              | -1.8 (-48.0 to 56.8)                |
| Iran                                          | 45.4 (40.8 to 49.8)        | 38.5 (34.4 to 42.7)        | 37.5 (33.3 to 41.7)        | 34.2 (29.2 to 39.5)        | -0.8 (-1.5 to -0.1)                            | -11.1 (-19.6 to -2.1)               |
| Iraq                                          | 100.4 (76.6 to 124.3)      | 39.6 (30.4 to 48.8)        | 36.4 (28.5 to 44.7)        | 18.8 (11.5 to 27.9)        | -5.1 (-8.4 to -2.0)                            | -51.9 (-71.5 to -25.4)              |
| Jordan                                        | 58.5 (46.2 to 68.9)        | 33.8 (26.5 to 41.2)        | 33.0 (25.8 to 40.5)        | 25.6 (17.3 to 36.5)        | -1.9 (-4.1 to 0.1)                             | -24.1 (-46.2 to 2.3)                |
| Kuwait                                        | 41.6 (35.2 to 48.5)        | 31.4 (26.1 to 36.9)        | 30.4 (25.1 to 36.3)        | 26.5 (18.8 to 35.4)        | -1.2 (-3.4 to 0.9)                             | -15.5 (-40.0 to 13.9)               |
| Lebanon                                       | 45.6 (37.9 to 54.0)        | 40.8 (34.0 to 48.2)        | 40.0 (32.9 to 46.9)        | 36.2 (25.4 to 48.4)        | -0.8 (-3.0 to 1.3)                             | -10.7 (-35.9 to 21.5)               |
| Libya                                         | 55.7 (37.8 to 76.0)        | 58.5 (38.1 to 82.7)        | 60.5 (38.3 to 84.3)        | 63.9 (28.2 to 115.3)       | 0.3 (-5.0 to 5.2)                              | 11.9 (-52.8 to 117.1)               |
| Morocco                                       | 68.8 (53.6 to 85.8)        | 56.0 (43.0 to 71.3)        | 55.1 (41.2 to 71.2)        | 48.5 (27.9 to 77.7)        | -1.1 (-4.6 to 2.3)                             | -12.8 (-49.9 to 41.6)               |
| Palestine                                     | 65.7 (53.1 to 80.9)        | 46.5 (35.5 to 58.2)        | 44.2 (33.8 to 55.8)        | 33.0 (20.4 to 48.3)        | -2.4 (-4.8 to 0.1)                             | -28.9 (-51.5 to 1.0)                |
| Oman                                          | 63.8 (48.2 to 82.6)        | 49.4 (37.8 to 63.9)        | 45.8 (34.0 to 59.0)        | 36.9 (20.3 to 58.1)        | -2.1 (-5.7 to 1.2)                             | -24.5 (-57.3 to 19.6)               |
| Qatar                                         | 101.2 (84.4 to 118.8)      | 57.2 (45.3 to 67.8)        | 54.5 (43.0 to 65.5)        | 37.3 (25.8 to 50.9)        | -2.9 (-4.6 to -1.1)                            | -34.8 (-60.2 to -15.3)              |
| Saudi Arabia                                  | 57.7 (41.8 to 74.9)        | 59.6 (40.0 to 80.0)        | 54.9 (38.7 to 72.4)        | 51.5 (26.9 to 83.6)        | -1.2 (-5.5 to 3.1)                             | -11.6 (-56.2 to 58.3)               |
| Sudan                                         | 137.0 (113.9 to 161.7)     | 87.5 (67.3 to 111.2)       | 82.9 (64.9 to 106.3)       | 60.1 (37.9 to 90.6)        | -2.6 (-5.4 to 0.1)                             | -30.9 (-55.5 to 1.5)                |
| Syria                                         | 64.5 (50.9 to 82.2)        | 52.6 (40.3 to 69.5)        | 51.8 (39.0 to 67.6)        | 45.8 (26.8 to 73.7)        | -1.1 (-4.6 to 2.2)                             | -12.4 (-44.9 to 38.5)               |
| Tunisia                                       | 54.0 (42.9 to 67.2)        | 42.0 (31.3 to 55.2)        | 41.8 (30.9 to 54.1)        | 36.6 (20.8 to 60.9)        | -1.1 (-4.5 to 2.3)                             | -11.9 (-48.7 to 40.5)               |
| Turkey                                        | 53.9 (44.6 to 63.8)        | 39.6 (31.7 to 48.0)        | 37.2 (29.1 to 45.4)        | 32.0 (19.4 to 45.4)        | -1.5 (-4.6 to 1.2)                             | -18.8 (-50.1 to 19.3)               |
| United Arab Emirates                          | 78.0 (60.9 to 95.2)        | 66.3 (49.8 to 84.4)        | 64.8 (47.8 to 82.9)        | 60.2 (34.0 to 93.0)        | -0.8 (-4.0 to 2.2)                             | -8.6 (-45.2 to 38.4)                |
| Yemen                                         | 128.1 (98.0 to 165.5)      | 84.6 (58.6 to 115.7)       | 81.6 (56.4 to 113.4)       | 63.3 (33.4 to 111.1)       | -2.1 (-6.0 to 1.8)                             | -24.2 (-59.5 to 30.8)               |
| <b>South Asia</b>                             |                            |                            |                            |                            |                                                |                                     |
| <b>South Asia</b>                             |                            |                            |                            |                            |                                                |                                     |
| Bangladesh                                    | 132.7 (115.3 to 149.9)     | 98.3 (86.1 to 110.6)       | 93.5 (80.0 to 106.1)       | 73.8 (57.3 to 92.0)        | -1.9 (-3.1 to -0.7)                            | -24.9 (-37.4 to -9.7)               |
| Bhutan                                        | 104.1 (85.8 to 122.3)      | 60.3 (47.0 to 76.0)        | 56.4 (43.2 to 72.2)        | 39.3 (25.1 to 58.8)        | -3.0 (-5.0 to -1.0)                            | -35.1 (-52.7 to -14.0)              |
| India                                         | 149.0 (128.4 to 169.2)     | 113.0 (97.5 to 127.3)      | 108.6 (93.3 to 123.3)      | 89.5 (75.1 to 104.8)       | -1.6 (-2.1 to -1.1)                            | -20.9 (-26.9 to -15.3)              |
| Nepal                                         | 132.1 (110.8 to 154.2)     | 113.4 (94.0 to 133.6)      | 110.2 (89.3 to 130.8)      | 101.9 (72.5 to 135.4)      | -0.8 (-2.5 to 1.0)                             | -10.0 (-31.7 to 16.3)               |
| Pakistan                                      | 131.7 (113.5 to 150.1)     | 107.8 (89.6 to 128.2)      | 103.2 (83.9 to 123.8)      | 89.1 (61.3 to 123.3)       | -1.3 (-3.3 to 0.6)                             | -17.4 (-38.8 to 9.4)                |
| <b>Southeast Asia, East Asia, and Oceania</b> |                            |                            |                            |                            |                                                |                                     |
| <b>East Asia</b>                              |                            |                            |                            |                            |                                                |                                     |
| China                                         | 104.9 (88.2 to 118.9)      | 61.7 (53.1 to 70.1)        | 56.5 (48.0 to 64.9)        | 36.7 (30.6 to 43.3)        | -3.5 (-4.1 to -2.9)                            | -40.5 (-45.8 to -35.3)              |
| North Korea                                   | 142.0 (113.6 to 173.5)     | 114.5 (91.0 to 138.6)      | 108.4 (84.8 to 131.8)      | 91.9 (66.2 to 119.0)       | -1.5 (-2.8 to -0.2)                            | -19.7 (-34.2 to -2.6)               |
| Taiwan (Province of China)                    | 37.1 (29.0 to 43.6)        | 26.8 (20.1 to 32.3)        | 26.1 (19.8 to 32.0)        | 20.9 (13.0 to 29.0)        | -1.7 (-4.3 to 0.3)                             | -21.9 (-47.2 to 4.8)                |
| <b>Oceania</b>                                |                            |                            |                            |                            |                                                |                                     |
| American Samoa                                | 66.1 (48.8 to 81.0)        | 52.9 (35.1 to 68.0)        | 51.3 (32.7 to 67.1)        | 42.6 (23.3 to 60.0)        | -1.5 (-3.0 to -0.5)                            | -20.2 (-36.7 to -6.5)               |
| Federated States of Micronesia                | 104.1 (79.2 to 128.1)      | 81.1 (46.4 to 107.5)       | 78.5 (46.4 to 105.8)       | 64.8 (28.6 to 105.9)       | -1.7 (-7.1 to 2.8)                             | -17.7 (-65.6 to 52.7)               |
| Fiji                                          | 126.1 (91.2 to 153.2)      | 97.3 (67.2 to 124.3)       | 90.9 (45.9 to 124.3)       | 75.8 (27.4 to 127.8)       | -2.0 (-8.1 to 3.0)                             | -20.1 (-70.3 to 56.3)               |
| Guam                                          | 41.4 (30.7 to 51.3)        | 37.1 (26.6 to 46.9)        | 36.1 (25.6 to 46.3)        | 34.1 (22.6 to 45.9)        | -0.6 (-1.5 to 0.2)                             | -8.7 (-20.6 to 2.3)                 |
| Kiribati                                      | 168.4 (143.6 to 188.4)     | 145.4 (118.5 to 169.8)     | 139.7 (115.5 to 163.0)     | 123.2 (90.4 to 156.5)      | -1.1 (-2.6 to 0.1)                             | -15.3 (-32.3 to 1.6)                |
| Marshall Islands                              | 116.7 (83.3 to 147.2)      | 86.3 (52.0 to 115.3)       | 80.0 (44.8 to 108.5)       | 61.7 (25.6 to 104.0)       | -2.5 (-7.8 to 2.1)                             | -26.6 (-69.2 to 37.1)               |
| Northern Mariana Islands                      | 38.3 (28.3 to 48.1)        | 30.5 (20.3 to 48.1)        | 29.0 (19.0 to 38.1)        | 25.1 (14.1 to 36.1)        | -1.4 (-2.9 to -0.2)                            | -18.2 (-35.2 to -2.5)               |
| Papua New Guinea                              | 262.3 (217.7 to 310.0)     | 227.6 (184.7 to 276.4)     | 218.5 (175.6 to 265.3)     | 188.3 (133.3 to 249.9)     | -1.3 (-3.0 to 0.5)                             | -17.2 (-36.4 to 7.5)                |

|                                                                                                                                           | Estimate in 2000 (95% UIs) | Estimate in 2015 (95% UIs) | Estimate in 2017 (95% UIs) | Estimate in 2020 (95% UIs) | Annualised rate of change, 2015-2020 (95% UIs) | Percent change, 2015-2020 (95% UIs) |
|-------------------------------------------------------------------------------------------------------------------------------------------|----------------------------|----------------------------|----------------------------|----------------------------|------------------------------------------------|-------------------------------------|
| Samoa                                                                                                                                     | 77.5 (62.9 to 92.9)        | 71.3 (55.7 to 85.9)        | 68.0 (52.6 to 84.2)        | 62.0 (38.9 to 88.1)        | -1.0 (-3.9 to 1.4)                             | -12.8 (-44.1 to 24.2)               |
| Solomon Islands                                                                                                                           | 205.2 (174.9 to 239.8)     | 176.7 (148.7 to 204.7)     | 171.8 (143.1 to 198.6)     | 149.3 (111.6 to 192.2)     | -1.2 (-2.7 to 0.3)                             | -15.4 (-33.1 to -4.0)               |
| Tonga                                                                                                                                     | 86.3 (68.0 to 101.5)       | 66.7 (45.4 to 86.2)        | 63.2 (39.8 to 82.6)        | 50.8 (23.1 to 79.7)        | -2.0 (-6.6 to 1.5)                             | -23.0 (-62.7 to 25.6)               |
| Vanuatu                                                                                                                                   | 150.0 (116.2 to 185.5)     | 126.5 (95.4 to 158.8)      | 123.5 (93.4 to 157.6)      | 106.9 (70.3 to 151.6)      | -1.2 (-3.3 to 0.6)                             | -15.4 (-38.9 to 9.8)                |
| <b>Southeast Asia</b>                                                                                                                     |                            |                            |                            |                            |                                                |                                     |
| Cambodia                                                                                                                                  | 170.4 (146.8 to 191.9)     | 102.6 (88.2 to 116.5)      | 98.7 (85.2 to 114.0)       | 73.0 (57.0 to 92.3)        | -2.3 (-3.5 to -1.0)                            | -28.8 (-41.1 to -14.3)              |
| Indonesia                                                                                                                                 | 75.3 (66.1 to 84.8)        | 58.7 (50.6 to 67.3)        | 55.7 (47.6 to 64.3)        | 45.1 (35.9 to 54.4)        | -1.8 (-2.7 to -0.9)                            | -23.3 (-33.7 to -13.3)              |
| Laos                                                                                                                                      | 194.4 (168.7 to 222.7)     | 113.2 (96.7 to 131.6)      | 105.8 (88.5 to 124.1)      | 70.1 (51.6 to 90.9)        | -3.2 (-4.8 to -1.9)                            | -38.1 (-51.1 to -24.2)              |
| Malaysia                                                                                                                                  | 55.6 (32.4 to 72.5)        | 44.3 (23.6 to 61.0)        | 42.1 (22.1 to 59.3)        | 35.0 (12.8 to 59.5)        | -1.9 (-7.4 to 2.8)                             | -19.1 (-66.9 to 51.6)               |
| Maldives                                                                                                                                  | 64.8 (54.6 to 76.0)        | 18.0 (13.4 to 22.6)        | 15.2 (10.3 to 20.0)        | 5.3 (2.8 to 7.8)           | -8.4 (-10.8 to -6.9)                           | -71.2 (-80.1 to -64.4)              |
| Mauritius                                                                                                                                 | 50.1 (36.2 to 63.2)        | 43.5 (26.0 to 57.5)        | 42.5 (24.4 to 56.5)        | 36.9 (15.8 to 60.9)        | -1.3 (-5.8 to 2.5)                             | -13.5 (-57.8 to 46.1)               |
| Myanmar                                                                                                                                   | 173.6 (144.5 to 202.5)     | 103.2 (86.0 to 123.3)      | 97.7 (81.3 to 117.1)       | 70.7 (52.7 to 89.1)        | -2.7 (-3.9 to -1.4)                            | -32.7 (-44.1 to -18.8)              |
| Philippines                                                                                                                               | 90.6 (73.6 to 105.6)       | 102.2 (84.9 to 119.2)      | 95.2 (76.1 to 113.5)       | 93.5 (63.2 to 128.1)       | -0.7 (-3.0 to 1.4)                             | -8.5 (-35.9 to 23.2)                |
| Sri Lanka                                                                                                                                 | 69.3 (61.0 to 79.4)        | 46.2 (38.0 to 54.6)        | 33.3 (19.4 to 47.1)        | 20.9 (9.1 to 36.3)         | -5.7 (-10.4 to -1.9)                           | -54.8 (-78.9 to -24.9)              |
| Seychelles                                                                                                                                | 44.9 (33.4 to 56.7)        | 37.5 (25.5 to 51.1)        | 36.7 (25.2 to 49.9)        | 31.6 (17.1 to 51.1)        | -1.3 (-3.1 to 0.5)                             | -16.6 (-37.5 to 7.8)                |
| Thailand                                                                                                                                  | 50.4 (41.2 to 59.6)        | 29.1 (22.3 to 35.2)        | 28.5 (20.7 to 36.2)        | 19.9 (10.8 to 30.9)        | -2.7 (-6.6 to 0.5)                             | -31.2 (-63.1 to 7.7)                |
| Timor-Leste                                                                                                                               | 130.8 (110.1 to 150.7)     | 87.9 (71.1 to 104.5)       | 86.7 (70.5 to 103.6)       | 72.6 (51.5 to 96.5)        | -1.3 (-2.9 to 0.3)                             | -17.5 (-35.6 to 4.3)                |
| Vietnam                                                                                                                                   | 77.1 (64.7 to 88.9)        | 54.2 (41.8 to 66.2)        | 51.5 (37.9 to 63.0)        | 39.3 (22.1 to 56.8)        | -2.3 (-5.6 to 0.4)                             | -27.1 (-57.0 to 6.8)                |
| <b>Sub-Saharan Africa</b>                                                                                                                 |                            |                            |                            |                            |                                                |                                     |
| <b>Central Sub-Saharan Africa</b>                                                                                                         |                            |                            |                            |                            |                                                |                                     |
| Angola                                                                                                                                    | 174.9 (146.2 to 202.6)     | 89.0 (72.9 to 107.2)       | 84.3 (68.3 to 103.3)       | 55.6 (37.8 to 79.4)        | -3.2 (-5.6 to -0.9)                            | -37.4 (-57.0 to -13.1)              |
| Central African Republic                                                                                                                  | 213.8 (179.7 to 251.0)     | 189.6 (154.3 to 223.8)     | 183.8 (149.6 to 219.7)     | 166.4 (123.2 to 218.7)     | -0.9 (-2.3 to 0.5)                             | -12.2 (-29.5 to 8.5)                |
| Congo                                                                                                                                     | 167.0 (143.8 to 193.9)     | 105.4 (82.8 to 130.1)      | 100.7 (79.4 to 126.2)      | 75.0 (47.3 to 112.3)       | -2.4 (-5.3 to 0.4)                             | -28.5 (-54.5 to 6.3)                |
| Democratic Republic of the Congo                                                                                                          | 165.6 (140.0 to 191.4)     | 135.2 (113.0 to 159.7)     | 129.5 (107.8 to 152.1)     | 110.5 (84.2 to 142.3)      | -1.4 (-2.8 to 0.1)                             | -18.2 (-33.9 to 1.4)                |
| Equatorial Guinea                                                                                                                         | 146.8 (113.6 to 187.6)     | 73.4 (51.4 to 101.8)       | 71.4 (49.8 to 99.8)        | 46.7 (27.0 to 76.4)        | -3.1 (-5.6 to -0.6)                            | -36.3 (-56.9 to -8.7)               |
| Gabon                                                                                                                                     | 92.8 (71.1 to 118.0)       | 66.0 (45.6 to 88.3)        | 64.1 (43.2 to 87.2)        | 50.8 (26.2 to 87.5)        | -2.0 (-6.4 to 2.3)                             | -21.3 (-61.6 to 42.0)               |
| <b>Eastern Sub-Saharan Africa</b>                                                                                                         |                            |                            |                            |                            |                                                |                                     |
| Burundi                                                                                                                                   | 197.7 (166.8 to 228.6)     | 135.9 (112.8 to 160.2)     | 131.9 (109.5 to 155.0)     | 103.2 (77.6 to 131.0)      | -1.9 (-3.2 to -0.6)                            | -24.1 (-38.1 to -8.2)               |
| Comoros                                                                                                                                   | 135.8 (114.8 to 156.3)     | 89.2 (74.0 to 104.8)       | 85.8 (71.2 to 101.5)       | 65.4 (48.1 to 85.5)        | -2.1 (-3.6 to -0.7)                            | -26.7 (-41.3 to -10.4)              |
| Djibouti                                                                                                                                  | 117.3 (87.7 to 152.4)      | 74.6 (49.4 to 105.0)       | 71.8 (49.8 to 100.1)       | 55.6 (29.8 to 96.8)        | -2.1 (-6.2 to 1.7)                             | -24.1 (-60.5 to 30.0)               |
| Eritrea                                                                                                                                   | 171.9 (143.6 to 203.2)     | 129.8 (106.0 to 156.1)     | 121.8 (99.7 to 147.3)      | 94.1 (67.0 to 124.6)       | -2.2 (-3.9 to -0.6)                            | -27.5 (-44.1 to -9.0)               |
| Ethiopia                                                                                                                                  | 153.3 (137.8 to 172.5)     | 86.8 (74.4 to 99.6)        | 82.1 (70.1 to 95.6)        | 55.0 (43.6 to 69.4)        | -3.1 (-3.9 to -2.1)                            | -36.8 (-44.6 to -27.1)              |
| Kenya                                                                                                                                     | 113.4 (99.9 to 129.5)      | 85.9 (75.4 to 98.5)        | 82.6 (72.2 to 95.1)        | 65.8 (55.4 to 77.8)        | -1.8 (-2.2 to -1.4)                            | -23.4 (-28.1 to -18.9)              |
| Madagascar                                                                                                                                | 184.8 (160.4 to 210.4)     | 148.9 (122.9 to 175.8)     | 143.6 (119.3 to 170.7)     | 123.0 (91.4 to 162.5)      | -1.3 (-2.8 to 0.0)                             | -17.5 (-34.0 to 0.5)                |
| Malawi                                                                                                                                    | 161.0 (136.1 to 185.1)     | 100.4 (85.4 to 115.8)      | 96.5 (81.5 to 112.3)       | 74.0 (56.5 to 93.5)        | -2.1 (-3.3 to -0.8)                            | -26.3 (-39.1 to -11.9)              |
| Mozambique                                                                                                                                | 160.6 (137.9 to 183.2)     | 123.4 (104.9 to 143.9)     | 116.4 (97.4 to 136.3)      | 94.7 (70.2 to 123.3)       | -1.8 (-3.2 to -0.4)                            | -23.3 (-38.3 to -6.3)               |
| Rwanda                                                                                                                                    | 190.3 (161.9 to 216.3)     | 93.1 (77.6 to 111.0)       | 89.7 (74.2 to 106.8)       | 61.2 (46.0 to 79.2)        | -2.8 (-4.1 to -1.5)                            | -34.3 (-46.1 to -20.6)              |
| Somalia                                                                                                                                   | 218.1 (171.6 to 259.5)     | 160.3 (124.6 to 202.0)     | 154.8 (119.9 to 197.1)     | 129.1 (89.8 to 176.9)      | -1.5 (-3.1 to 0.1)                             | -19.5 (-36.9 to 0.9)                |
| South Sudan                                                                                                                               | 178.9 (141.0 to 218.4)     | 150.3 (118.1 to 186.3)     | 145.6 (116.7 to 181.9)     | 129.6 (95.4 to 178.6)      | -1.0 (-2.5 to 0.5)                             | -13.8 (-31.4 to 7.2)                |
| Tanzania                                                                                                                                  | 123.6 (103.9 to 142.8)     | 91.8 (76.8 to 106.8)       | 89.2 (75.1 to 104.9)       | 74.6 (56.8 to 95.9)        | -1.4 (-2.7 to -0.1)                            | -18.7 (-33.6 to -2.0)               |
| Uganda                                                                                                                                    | 143.3 (120.9 to 167.0)     | 90.2 (76.5 to 106.1)       | 86.2 (72.6 to 100.1)       | 63.8 (47.9 to 81.0)        | -2.4 (-3.7 to -1.1)                            | -29.4 (-42.2 to -15.0)              |
| Zambia                                                                                                                                    | 150.1 (128.0 to 172.7)     | 92.6 (77.7 to 108.5)       | 89.1 (74.1 to 104.7)       | 66.5 (49.5 to 86.8)        | -2.2 (-3.7 to -0.7)                            | -28.1 (-42.4 to -10.4)              |
| <b>Southern Sub-Saharan Africa</b>                                                                                                        |                            |                            |                            |                            |                                                |                                     |
| Botswana                                                                                                                                  | 66.2 (51.6 to 84.6)        | 64.9 (51.6 to 79.3)        | 60.1 (48.0 to 74.2)        | 55.7 (36.0 to 81.6)        | -1.1 (-3.8 to 1.6)                             | -13.8 (-43.8 to 26.5)               |
| Lesotho                                                                                                                                   | 139.2 (115.6 to 164.8)     | 149.4 (119.8 to 178.8)     | 135.0 (107.0 to 161.9)     | 127.6 (87.2 to 174.5)      | -1.1 (-2.9 to 0.5)                             | -14.9 (-35.1 to 7.1)                |
| Namibia                                                                                                                                   | 128.9 (108.7 to 150.4)     | 68.6 (54.8 to 85.2)        | 65.1 (51.2 to 81.9)        | 42.9 (27.8 to 63.1)        | -3.2 (-6.0 to -0.6)                            | -37.3 (-59.5 to -8.3)               |
| South Africa                                                                                                                              | 91.4 (80.5 to 102.0)       | 56.7 (47.8 to 64.6)        | 49.7 (41.5 to 57.0)        | 33.8 (26.2 to 41.6)        | -3.5 (-4.6 to -2.4)                            | -40.4 (-50.2 to -29.9)              |
| Swaziland                                                                                                                                 | 145.6 (121.3 to 173.2)     | 103.8 (80.8 to 131.0)      | 92.8 (70.3 to 116.8)       | 63.6 (40.0 to 93.4)        | -3.4 (-5.5 to -1.4)                            | -38.8 (-55.9 to -18.7)              |
| Zimbabwe                                                                                                                                  | 124.3 (102.8 to 147.6)     | 119.8 (97.3 to 143.0)      | 112.6 (91.3 to 135.0)      | 101.7 (72.8 to 136.5)      | -1.1 (-2.9 to 0.5)                             | -15.1 (-35.3 to 8.3)                |
| <b>Western Sub-Saharan Africa</b>                                                                                                         |                            |                            |                            |                            |                                                |                                     |
| Benin                                                                                                                                     | 142.3 (120.5 to 164.0)     | 110.5 (91.3 to 132.8)      | 104.5 (86.1 to 125.0)      | 85.7 (63.5 to 114.5)       | -1.7 (-3.3 to -0.3)                            | -22.4 (-38.7 to -4.3)               |
| Burkina Faso                                                                                                                              | 160.0 (137.2 to 183.6)     | 129.2 (111.0 to 147.9)     | 124.5 (105.6 to 144.0)     | 111.0 (84.5 to 141.0)      | -1.1 (-2.8 to 0.3)                             | -14.1 (-31.1 to 4.9)                |
| Cameroon                                                                                                                                  | 152.1 (127.5 to 176.7)     | 112.7 (87.3 to 139.9)      | 104.5 (81.2 to 130.2)      | 80.8 (52.2 to 116.3)       | -2.3 (-4.7 to 0.1)                             | -28.1 (-50.4 to 1.7)                |
| Cape Verde                                                                                                                                | 62.1 (52.5 to 72.2)        | 47.2 (37.7 to 56.7)        | 45.0 (36.0 to 54.2)        | 37.6 (24.3 to 52.6)        | -1.6 (-4.3 to 0.8)                             | -20.0 (-47.7 to 13.1)               |
| Chad                                                                                                                                      | 179.1 (152.7 to 205.7)     | 153.1 (128.5 to 175.5)     | 148.8 (124.0 to 171.6)     | 134.6 (102.0 to 170.2)     | -0.9 (-2.4 to 0.5)                             | -12.1 (-29.8 to 7.7)                |
| Cote d'Ivoire                                                                                                                             | 150.9 (127.0 to 176.3)     | 117.7 (97.9 to 137.8)      | 109.3 (91.2 to 128.9)      | 87.7 (65.4 to 115.2)       | -2.0 (-3.5 to -0.6)                            | -25.4 (-41.2 to -8.1)               |
| The Gambia                                                                                                                                | 139.5 (117.3 to 163.3)     | 127.0 (106.7 to 148.1)     | 123.2 (102.9 to 145.2)     | 113.6 (86.1 to 147.8)      | -0.8 (-2.1 to 0.5)                             | -10.6 (-27.0 to 8.1)                |
| Ghana                                                                                                                                     | 120.7 (101.2 to 140.2)     | 102.1 (85.1 to 122.4)      | 96.6 (78.6 to 117.2)       | 84.3 (58.2 to 120.6)       | -1.4 (-3.5 to 0.8)                             | -17.2 (-40.9 to 12.8)               |
| Guinea                                                                                                                                    | 174.9 (149.8 to 200.1)     | 155.6 (131.2 to 184.6)     | 148.7 (123.7 to 176.5)     | 138.1 (102.7 to 177.7)     | -0.8 (-2.3 to 0.6)                             | -11.2 (-29.3 to 8.8)                |
| Guinea-Bissau                                                                                                                             | 205.1 (173.3 to 237.8)     | 156.7 (131.7 to 183.2)     | 149.3 (125.6 to 175.5)     | 122.3 (92.3 to 155.8)      | -1.7 (-3.0 to -0.3)                            | -22.0 (-36.6 to -4.9)               |
| Liberia                                                                                                                                   | 147.8 (125.7 to 170.0)     | 108.5 (91.6 to 127.3)      | 104.7 (88.1 to 124.4)      | 87.9 (66.2 to 116.3)       | -1.4 (-2.8 to -0.2)                            | -19.0 (-34.1 to -2.3)               |
| Mali                                                                                                                                      | 127.6 (109.2 to 146.6)     | 99.0 (83.7 to 115.7)       | 98.0 (82.3 to 115.9)       | 84.8 (62.7 to 108.6)       | -1.1 (-2.7 to 0.4)                             | -14.4 (-33.2 to 5.9)                |
| Mauritania                                                                                                                                | 110.3 (90.0 to 134.4)      | 79.7 (62.7 to 100.6)       | 76.1 (58.8 to 97.7)        | 60.7 (37.0 to 92.9)        | -2.0 (-5.1 to 1.2)                             | -23.3 (-53.6 to 19.0)               |
| Niger                                                                                                                                     | 175.8 (149.3 to 201.4)     | 132.5 (107.4 to 155.8)     | 130.0 (107.1 to 154.7)     | 113.6 (85.2 to 147.2)      | -1.1 (-2.6 to 0.4)                             | -14.2 (-31.9 to 6.6)                |
| Nigeria                                                                                                                                   | 118.6 (91.5 to 149.6)      | 77.2 (57.3 to 106.8)       | 74.8 (54.7 to 101.2)       | 59.1 (36.2 to 96.3)        | -1.9 (-4.5 to 1.1)                             | -23.0 (-49.1 to 17.5)               |
| Sao Tome and Principe                                                                                                                     | 139.4 (118.3 to 160.8)     | 100.7 (82.0 to 120.3)      | 97.8 (80.2 to 118.2)       | 82.3 (57.2 to 113.4)       | -1.4 (-3.4 to 0.4)                             | -18.2 (-40.0 to 6.4)                |
| Senegal                                                                                                                                   | 112.6 (95.8 to 129.9)      | 99.9 (84.2 to 117.8)       | 97.3 (82.4 to 114.7)       | 92.1 (70.2 to 117.0)       | -0.6 (-2.0 to 0.7)                             | -7.8 (-26.5 to 10.5)                |
| Sierra Leone                                                                                                                              | 184.5 (154.0 to 214.9)     | 145.5 (122.8 to 170.1)     | 138.4 (115.7 to 161.1)     | 115.2 (86.6 to 147.6)      | -1.6 (-2.9 to -0.3)                            | -20.9 (-35.5 to -4.7)               |
| Togo                                                                                                                                      | 142.1 (118.9 to 165.1)     | 111.3 (90.8 to 132.3)      | 105.6 (87.4 to 126.3)      | 87.4 (64.6 to 115.5)       | -1.7 (-3.1 to -0.3)                            | -21.5 (-37.1 to -4.1)               |
| <b>Indicator 3.9.2: Age-standardised death rate attributable to unsafe water, sanitation, and hygiene (WaSH) (per 100,000 population)</b> |                            |                            |                            |                            |                                                |                                     |
| <b>Central Europe, Eastern Europe, and Central Asia</b>                                                                                   |                            |                            |                            |                            |                                                |                                     |
| <b>Central Asia</b>                                                                                                                       |                            |                            |                            |                            |                                                |                                     |
| Armenia                                                                                                                                   | 3.9 (2.9 to 5.1)           | 0.6 (0.5 to 0.8)           | 0.6 (0.4 to 0.8)           | 0.3 (0.2 to 0.5)           | -4.8 (-6.0 to -3.6)                            | -50.8 (-59.3 to -41.7)              |
| Azerbaijan                                                                                                                                | 12.7 (9.8 to 15.6)         | 2.5 (1.7 to 3.5)           | 2.4 (1.6 to 3.4)           | 0.9 (0.5 to 1.6)           | -6.9 (-8.8 to -4.9)                            | -64.3 (-73.3 to -52.2)              |
| Georgia                                                                                                                                   | 2.9 (2.2 to 3.8)           | 0.7 (0.5 to 0.9)           | 0.6 (0.5 to 0.8)           | 0.5 (0.3 to 0.6)           | -2.8 (-3.7 to -1.8)                            | -33.8 (-42.9 to -23.8)              |
| Kazakhstan                                                                                                                                | 4.5 (3.5 to 6.6)           | 0.8 (0.6 to 1.1)           | 0.8 (0.6 to 1.0)           | 0.3 (0.2 to 0.5)           | -6.1 (-7.3 to -4.9)                            | -59.5 (-66.7 to -51.7)              |
| Kyrgyzstan                                                                                                                                | 10.6 (8.6 to 12.5)         | 2.1 (1.7 to 2.5)           | 2.0 (1.6 to 2.4)           | 0.8 (0.5 to 1.1)           | -7.0 (-8.5 to -5.2)                            | -64.5 (-72.1 to -54.5)              |
| Mongolia                                                                                                                                  | 7.1 (5.1 to 9.5)           | 2.1 (1.5 to 2.8)           | 1.9 (1.4 to 2.6)           | 0.9 (0.6 to 1.4)           | -5.8 (-7.2 to -4.1)                            | -57.6 (-65.9 to -45.7)              |
| Tajikistan                                                                                                                                | 32.2 (25.9 to 38.9)        | 16.0 (11.8 to 21.6)        | 15.3 (11.0 to 20.4)        | 10.8 (6.7 to 16.8)         | -2.7 (-4.4 to -1.0)                            | -33.2 (-48.4 to -13.3)              |
| Turkmenistan                                                                                                                              | 17.7 (14.2 to 21.3)        | 2.1 (1.5 to 2.9)           | 1.9 (1.3 to 2.6)           | 0.5 (0.3 to 0.8)           | -9.3 (-10.4 to -8.0)                           | -75.1 (-79.1 to -69.9)              |



|                                    | Estimate in 2000 (95% UIs) | Estimate in 2015 (95% UIs) | Estimate in 2017 (95% UIs) | Estimate in 2020 (95% UIs) | Annualised rate of change, 2015-2020 (95% UIs) | Percent change, 2015-2020 (95% UIs) |
|------------------------------------|----------------------------|----------------------------|----------------------------|----------------------------|------------------------------------------------|-------------------------------------|
| Uzbekistan                         | 5.2 (3.9 to 6.5)           | 1.7 (1.2 to 2.2)           | 1.5 (1.1 to 2.0)           | 0.7 (0.4 to 1.0)           | -6.1 (-7.3 to -4.8)                            | -59.6 (-66.3 to -51.4)              |
| <b>Central Europe</b>              |                            |                            |                            |                            |                                                |                                     |
| Albania                            | 1.0 (0.7 to 1.4)           | 0.3 (0.2 to 0.5)           | 0.3 (0.2 to 0.4)           | 0.2 (0.1 to 0.3)           | -5.1 (-6.8 to -3.3)                            | -52.7 (-63.7 to -38.8)              |
| Bosnia and Herzegovina             | 0.3 (0.2 to 0.5)           | 0.2 (0.1 to 0.3)           | 0.2 (0.1 to 0.3)           | 0.1 (0.1 to 0.2)           | -3.1 (-4.8 to -1.2)                            | -36.8 (-51.6 to -16.5)              |
| Bulgaria                           | 0.4 (0.3 to 0.6)           | 0.2 (0.1 to 0.4)           | 0.2 (0.1 to 0.4)           | 0.2 (0.1 to 0.3)           | -3.3 (-5.0 to -1.4)                            | -38.1 (-52.5 to -18.3)              |
| Croatia                            | 0.2 (0.1 to 0.3)           | 0.2 (0.1 to 0.3)           | 0.2 (0.1 to 0.3)           | 0.2 (0.1 to 0.3)           | -1.6 (-3.4 to 0.1)                             | -21.0 (-40.0 to 2.0)                |
| Czech Republic                     | 0.1 (0.1 to 0.2)           | 0.4 (0.2 to 0.8)           | 0.4 (0.2 to 0.7)           | 0.6 (0.2 to 1.1)           | 1.6 (0.1 to 3.3)                               | 28.9 (1.3 to 65.2)                  |
| Hungary                            | 0.1 (0.1 to 0.1)           | 0.6 (0.3 to 1.0)           | 0.5 (0.2 to 0.8)           | 0.7 (0.3 to 1.2)           | 0.3 (-1.2 to 1.8)                              | 6.1 (-16.2 to 31.1)                 |
| Macedonia                          | 1.6 (0.9 to 2.3)           | 0.2 (0.1 to 0.3)           | 0.2 (0.1 to 0.3)           | 0.1 (0.0 to 0.2)           | -5.7 (-7.9 to -3.4)                            | -57.1 (-69.5 to -40.3)              |
| Montenegro                         | 0.3 (0.2 to 0.4)           | 0.1 (0.1 to 0.2)           | 0.1 (0.1 to 0.2)           | 0.1 (0.1 to 0.1)           | -2.3 (-3.7 to -0.9)                            | -28.6 (-42.6 to -12.5)              |
| Poland                             | 0.2 (0.1 to 0.3)           | 0.2 (0.1 to 0.4)           | 0.2 (0.1 to 0.3)           | 0.2 (0.1 to 0.4)           | -0.6 (-1.9 to 0.7)                             | -7.5 (-24.8 to 11.9)                |
| Romania                            | 1.9 (1.5 to 2.4)           | 0.6 (0.4 to 0.8)           | 0.5 (0.4 to 0.7)           | 0.3 (0.2 to 0.5)           | -4.1 (-5.4 to -2.8)                            | -45.8 (-55.6 to -34.6)              |
| Serbia                             | 0.3 (0.2 to 0.4)           | 0.3 (0.1 to 0.5)           | 0.3 (0.1 to 0.5)           | 0.3 (0.1 to 0.8)           | -0.1 (-3.8 to 3.6)                             | 4.4 (-43.8 to 70.5)                 |
| Slovakia                           | 0.3 (0.2 to 0.4)           | 0.2 (0.1 to 0.3)           | 0.2 (0.1 to 0.3)           | 0.1 (0.1 to 0.3)           | -2.4 (-3.9 to -0.7)                            | -29.1 (-44.5 to -9.4)               |
| Slovenia                           | 0.2 (0.1 to 0.3)           | 0.1 (0.1 to 0.1)           | 0.1 (0.1 to 0.1)           | 0.1 (0.0 to 0.1)           | -3.1 (-4.5 to -1.7)                            | -36.9 (-49.4 to -22.4)              |
| <b>Eastern Europe</b>              |                            |                            |                            |                            |                                                |                                     |
| Belarus                            | 0.9 (0.7 to 1.1)           | 0.1 (0.1 to 0.2)           | 0.1 (0.1 to 0.2)           | 0.1 (0.1 to 0.1)           | -4.8 (-6.1 to -3.5)                            | -51.1 (-59.8 to -40.5)              |
| Estonia                            | 0.4 (0.2 to 0.5)           | 0.1 (0.1 to 0.2)           | 0.1 (0.1 to 0.2)           | 0.1 (0.1 to 0.1)           | -3.2 (-4.9 to -1.7)                            | -37.7 (-52.3 to -22.0)              |
| Latvia                             | 0.5 (0.3 to 0.6)           | 0.2 (0.2 to 0.3)           | 0.2 (0.1 to 0.3)           | 0.1 (0.1 to 0.2)           | -3.1 (-4.6 to -1.6)                            | -36.5 (-50.2 to -20.8)              |
| Lithuania                          | 0.3 (0.2 to 0.4)           | 0.3 (0.2 to 0.4)           | 0.3 (0.2 to 0.4)           | 0.3 (0.2 to 0.4)           | -0.8 (-2.0 to 0.5)                             | -10.2 (-26.2 to 8.1)                |
| Moldova                            | 3.2 (2.4 to 4.1)           | 1.0 (0.7 to 1.4)           | 0.9 (0.7 to 1.2)           | 0.5 (0.3 to 0.7)           | -4.8 (-6.0 to -3.7)                            | -51.5 (-59.6 to -42.3)              |
| Russia                             | 1.2 (1.0 to 1.5)           | 0.4 (0.3 to 0.6)           | 0.4 (0.3 to 0.5)           | 0.2 (0.1 to 0.3)           | -4.7 (-5.8 to -3.6)                            | -50.4 (-57.9 to -41.9)              |
| Ukraine                            | 0.8 (0.6 to 1.0)           | 0.5 (0.3 to 0.6)           | 0.4 (0.3 to 0.6)           | 0.3 (0.2 to 0.5)           | -2.3 (-3.3 to -1.2)                            | -28.5 (-38.8 to -17.0)              |
| <b>High-income</b>                 |                            |                            |                            |                            |                                                |                                     |
| <b>Australasia</b>                 |                            |                            |                            |                            |                                                |                                     |
| Australia                          | 0.2 (0.1 to 0.3)           | 0.2 (0.1 to 0.3)           | 0.2 (0.1 to 0.3)           | 0.2 (0.1 to 0.3)           | -0.5 (-2.1 to 1.0)                             | -6.0 (-26.6 to 17.0)                |
| New Zealand                        | 0.2 (0.1 to 0.2)           | 0.3 (0.2 to 0.5)           | 0.3 (0.2 to 0.5)           | 0.3 (0.2 to 0.6)           | -0.1 (-1.6 to 1.4)                             | -1.2 (-21.9 to 23.8)                |
| <b>High-income Asia Pacific</b>    |                            |                            |                            |                            |                                                |                                     |
| Brunei                             | 0.7 (0.4 to 1.1)           | 0.7 (0.4 to 1.1)           | 0.7 (0.4 to 1.0)           | 0.7 (0.3 to 1.2)           | 0.0 (-2.1 to 1.8)                              | 1.5 (-27.2 to 31.0)                 |
| Japan                              | 0.5 (0.3 to 0.7)           | 0.4 (0.3 to 0.6)           | 0.4 (0.2 to 0.6)           | 0.3 (0.2 to 0.5)           | -1.3 (-2.5 to -0.1)                            | -17.8 (-31.4 to -1.7)               |
| South Korea                        | 0.5 (0.3 to 0.7)           | 0.5 (0.3 to 0.8)           | 0.5 (0.3 to 0.7)           | 0.4 (0.2 to 0.7)           | -1.0 (-2.4 to 0.5)                             | -13.4 (-29.7 to 7.4)                |
| Singapore                          | 0.7 (0.4 to 1.0)           | 0.5 (0.3 to 0.8)           | 0.5 (0.3 to 0.7)           | 0.4 (0.2 to 0.6)           | -1.6 (-3.1 to -0.1)                            | -21.0 (-37.6 to -2.1)               |
| <b>High-income North America</b>   |                            |                            |                            |                            |                                                |                                     |
| Canada                             | 0.2 (0.1 to 0.3)           | 0.3 (0.2 to 0.4)           | 0.2 (0.2 to 0.4)           | 0.3 (0.1 to 0.4)           | -0.4 (-2.0 to 1.2)                             | -5.2 (-26.5 to 19.7)                |
| Greenland                          | 0.8 (0.5 to 1.6)           | 0.7 (0.4 to 1.1)           | 0.7 (0.3 to 1.0)           | 0.6 (0.2 to 1.1)           | -1.6 (-4.2 to 0.9)                             | -20.0 (-46.9 to 14.8)               |
| United States                      | 0.3 (0.2 to 0.4)           | 0.3 (0.2 to 0.4)           | 0.3 (0.2 to 0.4)           | 0.3 (0.2 to 0.4)           | -0.5 (-1.9 to 0.9)                             | -7.0 (-24.3 to 13.8)                |
| <b>Southern Latin America</b>      |                            |                            |                            |                            |                                                |                                     |
| Argentina                          | 2.5 (1.9 to 3.1)           | 1.6 (1.1 to 2.2)           | 1.5 (1.0 to 2.1)           | 1.2 (0.7 to 1.8)           | -2.3 (-3.8 to -0.8)                            | -28.5 (-43.4 to -10.8)              |
| Chile                              | 1.8 (1.3 to 2.3)           | 1.0 (0.6 to 1.4)           | 0.9 (0.6 to 1.4)           | 0.7 (0.4 to 1.0)           | -2.8 (-4.4 to -1.0)                            | -33.4 (-48.5 to -13.6)              |
| Uruguay                            | 1.9 (1.3 to 2.5)           | 1.4 (0.8 to 2.2)           | 1.3 (0.8 to 2.0)           | 1.1 (0.5 to 2.0)           | -1.9 (-3.6 to -0.0)                            | -23.6 (-42.0 to -0.3)               |
| <b>Western Europe</b>              |                            |                            |                            |                            |                                                |                                     |
| Andorra                            | 0.2 (0.1 to 0.3)           | 0.1 (0.1 to 0.2)           | 0.1 (0.1 to 0.2)           | 0.1 (0.1 to 0.2)           | -0.5 (-2.2 to 1.2)                             | -6.4 (-28.0 to 19.4)                |
| Austria                            | 0.1 (0.0 to 0.1)           | 0.1 (0.1 to 0.1)           | 0.1 (0.1 to 0.1)           | 0.1 (0.1 to 0.1)           | 0.6 (-1.2 to 2.4)                              | 9.9 (-16.6 to 44.1)                 |
| Belgium                            | 0.2 (0.2 to 0.3)           | 0.3 (0.2 to 0.5)           | 0.3 (0.2 to 0.4)           | 0.3 (0.2 to 0.5)           | -0.4 (-1.9 to 1.1)                             | -4.8 (-24.5 to 18.4)                |
| Cyprus                             | 0.2 (0.1 to 0.4)           | 0.2 (0.1 to 0.3)           | 0.2 (0.1 to 0.3)           | 0.2 (0.1 to 0.4)           | -1.2 (-3.9 to 2.1)                             | -13.0 (-44.7 to 36.0)               |
| Denmark                            | 0.2 (0.1 to 0.2)           | 0.3 (0.2 to 0.4)           | 0.3 (0.2 to 0.4)           | 0.3 (0.2 to 0.5)           | 0.5 (-0.9 to 2.1)                              | 8.5 (-12.9 to 37.5)                 |
| Finland                            | 0.2 (0.1 to 0.3)           | 0.1 (0.0 to 0.1)           | 0.1 (0.0 to 0.1)           | 0.0 (0.0 to 0.0)           | -4.6 (-5.8 to -3.2)                            | -49.2 (-58.4 to -38.3)              |
| France                             | 0.3 (0.2 to 0.4)           | 0.1 (0.1 to 0.2)           | 0.1 (0.1 to 0.2)           | 0.1 (0.1 to 0.1)           | -3.4 (-4.8 to -2.0)                            | -39.9 (-51.4 to -25.8)              |
| Germany                            | 0.1 (0.1 to 0.1)           | 0.2 (0.1 to 0.3)           | 0.2 (0.1 to 0.3)           | 0.2 (0.1 to 0.4)           | 0.7 (-1.1 to 2.4)                              | 11.5 (-14.6 to 42.7)                |
| Greece                             | 0.1 (0.1 to 0.1)           | 0.1 (0.1 to 0.1)           | 0.1 (0.1 to 0.1)           | 0.1 (0.1 to 0.2)           | 0.2 (-1.2 to 1.6)                              | 3.3 (-16.7 to 27.2)                 |
| Iceland                            | 0.2 (0.1 to 0.2)           | 0.1 (0.1 to 0.2)           | 0.1 (0.1 to 0.2)           | 0.1 (0.1 to 0.2)           | 0.2 (-1.3 to 1.6)                              | 3.0 (-17.9 to 27.8)                 |
| Ireland                            | 0.3 (0.2 to 0.4)           | 0.1 (0.1 to 0.2)           | 0.1 (0.1 to 0.2)           | 0.1 (0.1 to 0.2)           | -2.7 (-4.2 to -1.1)                            | -32.5 (-46.4 to -15.7)              |
| Israel                             | 0.3 (0.2 to 0.4)           | 0.3 (0.2 to 0.5)           | 0.3 (0.2 to 0.5)           | 0.3 (0.2 to 0.6)           | -0.1 (-1.7 to 1.5)                             | -0.2 (-22.0 to 26.0)                |
| Italy                              | 0.1 (0.0 to 0.1)           | 0.1 (0.1 to 0.2)           | 0.1 (0.1 to 0.1)           | 0.1 (0.1 to 0.2)           | 0.6 (-0.8 to 2.2)                              | 10.9 (-11.4 to 38.9)                |
| Luxembourg                         | 0.2 (0.1 to 0.2)           | 0.2 (0.1 to 0.3)           | 0.2 (0.1 to 0.3)           | 0.2 (0.1 to 0.3)           | -0.4 (-2.0 to 2.0)                             | -5.6 (-26.4 to 20.2)                |
| Malta                              | 0.2 (0.1 to 0.2)           | 0.1 (0.1 to 0.2)           | 0.1 (0.1 to 0.2)           | 0.1 (0.1 to 0.2)           | -0.8 (-2.2 to 0.5)                             | -10.5 (-20.8 to 8.5)                |
| Netherlands                        | 0.2 (0.1 to 0.3)           | 0.1 (0.1 to 0.2)           | 0.1 (0.1 to 0.2)           | 0.1 (0.1 to 0.2)           | -1.3 (-2.8 to 0.1)                             | -17.6 (-34.1 to 2.0)                |
| Norway                             | 0.2 (0.2 to 0.3)           | 0.3 (0.2 to 0.4)           | 0.2 (0.2 to 0.4)           | 0.2 (0.1 to 0.4)           | -0.5 (-1.9 to 0.7)                             | -7.2 (-24.4 to 11.3)                |
| Portugal                           | 0.3 (0.2 to 0.4)           | 0.3 (0.2 to 0.4)           | 0.3 (0.2 to 0.4)           | 0.3 (0.2 to 0.5)           | -0.4 (-1.7 to 1.0)                             | -5.0 (-23.0 to 16.6)                |
| Spain                              | 0.1 (0.1 to 0.2)           | 0.1 (0.1 to 0.2)           | 0.1 (0.1 to 0.2)           | 0.1 (0.1 to 0.2)           | -1.0 (-2.5 to 0.5)                             | -13.7 (-31.5 to 7.0)                |
| Sweden                             | 0.1 (0.1 to 0.2)           | 0.2 (0.2 to 0.4)           | 0.2 (0.1 to 0.4)           | 0.3 (0.2 to 0.5)           | 0.9 (-0.7 to 2.6)                              | 16.1 (-10.5 to 47.1)                |
| Switzerland                        | 0.1 (0.1 to 0.1)           | 0.1 (0.1 to 0.2)           | 0.1 (0.1 to 0.2)           | 0.1 (0.1 to 0.2)           | -0.7 (-2.3 to 0.8)                             | -9.9 (-29.2 to 13.3)                |
| United Kingdom                     | 0.3 (0.2 to 0.4)           | 0.2 (0.1 to 0.3)           | 0.2 (0.1 to 0.3)           | 0.1 (0.1 to 0.2)           | -1.9 (-3.2 to -0.7)                            | -24.7 (-38.2 to -10.0)              |
| <b>Latin America and Caribbean</b> |                            |                            |                            |                            |                                                |                                     |
| <b>Andean Latin America</b>        |                            |                            |                            |                            |                                                |                                     |
| Bolivia                            | 25.2 (18.8 to 33.0)        | 7.5 (5.2 to 11.2)          | 6.9 (4.7 to 10.6)          | 3.6 (2.1 to 6.0)           | -5.0 (-6.4 to -3.6)                            | -52.7 (-61.8 to -41.7)              |
| Ecuador                            | 9.8 (7.7 to 11.8)          | 3.2 (2.3 to 4.1)           | 3.3 (2.3 to 4.2)           | 1.7 (1.0 to 2.4)           | -4.5 (-5.9 to -3.2)                            | -49.1 (-58.5 to -37.8)              |
| Peru                               | 11.9 (9.2 to 15.6)         | 5.3 (3.8 to 8.1)           | 5.2 (3.5 to 7.9)           | 3.2 (2.0 to 5.6)           | -3.4 (-5.0 to -1.8)                            | -39.3 (-53.0 to -23.9)              |
| <b>Caribbean</b>                   |                            |                            |                            |                            |                                                |                                     |
| Antigua and Barbuda                | 4.2 (3.3 to 5.2)           | 3.1 (2.3 to 3.9)           | 3.0 (2.2 to 3.8)           | 2.5 (1.7 to 3.4)           | -1.5 (-2.5 to -0.5)                            | -19.7 (-31.4 to -7.3)               |
| The Bahamas                        | 2.8 (2.2 to 3.6)           | 2.2 (1.6 to 2.9)           | 2.2 (1.6 to 2.9)           | 1.9 (1.3 to 2.7)           | -1.0 (-1.9 to -0.0)                            | -13.4 (-25.3 to -0.2)               |
| Barbados                           | 3.2 (2.3 to 4.0)           | 2.5 (1.8 to 3.2)           | 2.5 (1.8 to 3.2)           | 2.1 (1.4 to 3.0)           | -1.1 (-2.1 to -0.1)                            | -14.7 (-27.5 to -1.0)               |
| Belize                             | 9.3 (7.8 to 10.8)          | 5.9 (4.7 to 7.2)           | 5.8 (4.5 to 7.0)           | 4.4 (3.2 to 5.8)           | -2.1 (-2.9 to -0.9)                            | -26.4 (-35.5 to -13.3)              |
| Bermuda                            | 1.2 (0.9 to 1.6)           | 0.8 (0.6 to 1.0)           | 0.8 (0.5 to 1.0)           | 0.6 (0.4 to 0.8)           | -2.1 (-3.1 to -1.0)                            | -26.6 (-36.7 to -14.4)              |
| Cuba                               | 4.4 (3.6 to 5.2)           | 2.5 (1.9 to 3.0)           | 2.4 (1.8 to 2.9)           | 1.6 (1.1 to 2.2)           | -2.9 (-4.2 to -1.5)                            | -35.0 (-46.7 to -19.8)              |
| Dominica                           | 4.6 (3.6 to 5.5)           | 4.0 (3.1 to 5.0)           | 3.9 (3.0 to 4.9)           | 3.9 (2.5 to 5.7)           | -0.4 (-1.7 to 1.2)                             | -4.8 (-22.0 to 20.0)                |
| Dominican Republic                 | 13.1 (10.5 to 17.4)        | 6.9 (5.2 to 9.6)           | 6.5 (4.8 to 9.1)           | 4.4 (3.6 to 6.8)           | -3.0 (-4.6 to -1.6)                            | -36.3 (-50.0 to -21.4)              |
| Grenada                            | 5.0 (3.7 to 6.3)           | 3.6 (2.6 to 4.8)           | 3.4 (2.4 to 4.5)           | 2.7 (1.8 to 3.9)           | -2.0 (-3.0 to -1.0)                            | -25.5 (-35.8 to -13.5)              |
| Guyana                             | 21.1 (18.2 to 23.9)        | 11.6 (9.4 to 13.8)         | 10.9 (8.7 to 13.0)         | 7.6 (5.6 to 10.0)          | -2.9 (-3.9 to -1.8)                            | -35.0 (-44.6 to -23.9)              |
| Haiti                              | 66.5 (53.5 to 80.6)        | 43.0 (32.5 to 55.5)        | 38.5 (28.5 to 51.6)        | 22.1 (14.3 to 33.4)        | -4.5 (-6.0 to -3.1)                            | -48.9 (-59.3 to -37.0)              |

|                                               | Estimate in 2000 (95% UIs) | Estimate in 2015 (95% UIs) | Estimate in 2017 (95% UIs) | Estimate in 2030 (95% UIs) | Annualised rate of change, 2015-2030 (95% UIs) | Percent change, 2015-2030 (95% UIs) |
|-----------------------------------------------|----------------------------|----------------------------|----------------------------|----------------------------|------------------------------------------------|-------------------------------------|
| Jamaica                                       | 3.9 (3.1 to 4.7)           | 2.3 (1.8 to 3.0)           | 2.3 (1.7 to 3.0)           | 1.8 (1.2 to 2.6)           | -1.9 (-3.0 to -0.7)                            | -24.0 (-36.1 to -9.8)               |
| Puerto Rico                                   | 1.7 (1.2 to 2.2)           | 1.5 (1.1 to 1.9)           | 1.5 (1.1 to 2.0)           | 1.5 (1.0 to 2.0)           | 0.1 (-0.2 to 0.9)                              | -1.8 (-16.7 to 15.2)                |
| Saint Lucia                                   | 4.7 (3.9 to 5.5)           | 2.7 (2.2 to 3.3)           | 2.7 (2.1 to 3.2)           | 1.9 (1.4 to 2.5)           | -2.4 (-3.4 to -1.6)                            | -30.5 (-40.1 to -21.1)              |
| Saint Vincent and the Grenadines              | 7.8 (6.5 to 9.2)           | 5.1 (4.1 to 6.2)           | 4.9 (3.9 to 6.0)           | 3.8 (2.8 to 5.0)           | -2.0 (-2.8 to -1.1)                            | -25.3 (-34.1 to -14.8)              |
| Suriname                                      | 17.0 (14.2 to 19.7)        | 8.9 (7.1 to 10.4)          | 8.6 (6.8 to 10.2)          | 6.0 (4.4 to 7.7)           | -2.7 (-3.6 to -1.7)                            | -32.6 (-42.1 to -23.0)              |
| Trinidad and Tobago                           | 4.5 (3.6 to 5.4)           | 2.4 (1.8 to 3.1)           | 2.4 (1.8 to 3.1)           | 1.8 (1.1 to 2.5)           | -2.1 (-3.5 to -0.6)                            | -26.1 (-40.9 to -8.9)               |
| Virgin Islands, U.S.                          | 1.8 (1.4 to 2.2)           | 1.4 (1.0 to 1.8)           | 1.4 (1.0 to 1.8)           | 1.2 (0.8 to 1.7)           | -1.2 (-2.4 to -0.1)                            | -16.7 (-29.9 to -1.7)               |
| <b>Central Latin America</b>                  |                            |                            |                            |                            |                                                |                                     |
| Colombia                                      | 5.4 (4.2 to 6.4)           | 1.8 (1.2 to 2.3)           | 1.7 (1.2 to 2.2)           | 0.8 (0.5 to 1.2)           | -5.1 (-6.4 to -3.7)                            | -53.1 (-61.8 to -42.3)              |
| Costa Rica                                    | 3.0 (2.1 to 3.9)           | 1.5 (1.0 to 2.1)           | 1.5 (1.0 to 2.1)           | 1.0 (0.6 to 1.6)           | -2.7 (-3.9 to -1.4)                            | -32.7 (-44.4 to -19.2)              |
| El Salvador                                   | 16.0 (12.3 to 21.4)        | 6.7 (4.3 to 11.6)          | 6.4 (4.1 to 11.3)          | 4.2 (2.1 to 8.4)           | -3.3 (-5.2 to -1.4)                            | -38.1 (-54.4 to -19.0)              |
| Guatemala                                     | 57.8 (50.8 to 64.0)        | 23.6 (19.0 to 27.4)        | 23.2 (19.0 to 27.6)        | 12.7 (9.4 to 16.9)         | -4.2 (-5.3 to -3.0)                            | -46.5 (-55.1 to -36.5)              |
| Honduras                                      | 32.7 (20.9 to 47.1)        | 16.0 (9.3 to 25.0)         | 15.1 (8.6 to 24.1)         | 10.6 (5.0 to 18.3)         | -2.9 (-4.7 to -0.9)                            | -34.3 (-50.8 to -12.5)              |
| Mexico                                        | 6.8 (5.3 to 8.2)           | 3.0 (2.1 to 3.8)           | 2.9 (2.0 to 3.7)           | 1.6 (1.1 to 2.3)           | -3.9 (-4.8 to -3.2)                            | -44.4 (-51.1 to -38.2)              |
| Nicaragua                                     | 17.0 (13.9 to 21.6)        | 3.9 (2.5 to 6.7)           | 3.6 (2.5 to 6.3)           | 1.6 (0.8 to 3.1)           | -6.3 (-8.2 to -4.1)                            | -60.6 (-70.9 to -45.9)              |
| Panama                                        | 5.9 (4.8 to 7.1)           | 4.7 (3.5 to 5.8)           | 4.2 (3.1 to 5.4)           | 3.0 (1.9 to 4.4)           | -3.0 (-4.4 to -1.4)                            | -35.5 (-48.2 to -19.5)              |
| Venezuela                                     | 8.4 (5.9 to 10.4)          | 3.8 (2.5 to 4.9)           | 3.6 (2.4 to 4.9)           | 2.3 (1.4 to 3.4)           | -3.4 (-4.8 to -1.9)                            | -39.6 (-51.4 to -24.9)              |
| <b>Tropical Latin America</b>                 |                            |                            |                            |                            |                                                |                                     |
| Brazil                                        | 11.6 (9.8 to 13.3)         | 3.7 (2.9 to 4.5)           | 3.6 (2.8 to 4.4)           | 2.1 (1.5 to 2.7)           | -3.9 (-4.7 to -3.2)                            | -44.4 (-50.8 to -38.2)              |
| Paraguay                                      | 12.3 (9.4 to 16.2)         | 3.8 (2.6 to 5.6)           | 3.6 (2.5 to 5.3)           | 1.9 (1.1 to 3.0)           | -4.8 (-6.5 to -3.3)                            | -51.2 (-62.1 to -39.0)              |
| <b>North Africa and Middle East</b>           |                            |                            |                            |                            |                                                |                                     |
| <b>North Africa and Middle East</b>           |                            |                            |                            |                            |                                                |                                     |
| Algeria                                       | 46.0 (33.4 to 59.6)        | 18.9 (14.1 to 24.5)        | 17.8 (13.0 to 23.0)        | 10.3 (6.8 to 15.4)         | -4.1 (-5.7 to -2.5)                            | -45.6 (-57.2 to -30.8)              |
| Algeria                                       | 4.1 (2.8 to 5.8)           | 1.3 (0.7 to 1.8)           | 1.1 (0.7 to 1.6)           | 0.6 (0.4 to 1.0)           | -4.8 (-6.2 to -3.4)                            | -51.2 (-60.5 to -40.2)              |
| Bahrain                                       | 2.9 (1.5 to 4.4)           | 1.5 (0.8 to 2.3)           | 1.4 (0.8 to 2.2)           | 0.9 (0.5 to 1.5)           | -3.4 (-4.7 to -2.1)                            | -39.5 (-50.9 to -27.0)              |
| Egypt                                         | 20.8 (16.0 to 26.6)        | 6.8 (4.4 to 9.8)           | 5.9 (3.8 to 8.6)           | 2.8 (1.4 to 4.7)           | -6.2 (-8.3 to -3.8)                            | -59.9 (-71.2 to -43.8)              |
| Iran                                          | 2.3 (1.7 to 2.9)           | 1.4 (0.9 to 2.1)           | 1.2 (0.8 to 1.9)           | 1.0 (0.6 to 1.7)           | -2.4 (-3.4 to -1.4)                            | -30.3 (-40.3 to -19.4)              |
| Iraq                                          | 3.3 (2.2 to 4.5)           | 1.5 (1.0 to 2.1)           | 1.2 (0.8 to 1.8)           | 0.6 (0.3 to 1.0)           | -6.6 (-8.8 to -4.3)                            | -62.1 (-73.1 to -47.7)              |
| Jordan                                        | 2.3 (1.6 to 3.0)           | 1.1 (0.7 to 1.5)           | 1.0 (0.7 to 1.5)           | 0.7 (0.4 to 1.1)           | -3.3 (-4.6 to -1.9)                            | -38.6 (-49.7 to -24.3)              |
| Kuwait                                        | 0.8 (0.5 to 1.0)           | 0.8 (0.5 to 1.2)           | 0.8 (0.5 to 1.1)           | 0.1 (-1.4 to 1.7)          | 0.1 (-1.4 to 1.7)                              | 2.0 (-9.2 to 29.7)                  |
| Lebanon                                       | 2.5 (1.6 to 3.4)           | 1.4 (0.9 to 2.0)           | 1.3 (0.8 to 1.9)           | 0.9 (0.5 to 1.5)           | -2.8 (-4.5 to -1.1)                            | -33.4 (-49.2 to -14.9)              |
| Libya                                         | 3.8 (2.5 to 5.6)           | 1.9 (1.2 to 2.6)           | 1.9 (1.2 to 2.6)           | 1.4 (0.8 to 2.0)           | -2.1 (-3.4 to -0.8)                            | -27.2 (-49.1 to -11.4)              |
| Morocco                                       | 14.1 (10.1 to 18.3)        | 4.3 (2.9 to 5.9)           | 3.8 (2.6 to 5.3)           | 1.8 (1.1 to 2.8)           | -5.9 (-7.4 to -4.2)                            | -58.4 (-67.1 to -47.0)              |
| Palestine                                     | 3.3 (2.3 to 4.3)           | 2.1 (1.4 to 3.1)           | 1.9 (1.3 to 2.9)           | 1.3 (0.8 to 2.2)           | -3.2 (-4.5 to -1.7)                            | -37.6 (-48.7 to -22.3)              |
| Oman                                          | 3.9 (2.5 to 5.6)           | 1.7 (1.0 to 2.5)           | 1.5 (0.9 to 2.3)           | 0.8 (0.4 to 1.5)           | -4.8 (-6.6 to -2.7)                            | -51.1 (-63.0 to -33.7)              |
| Qatar                                         | 1.0 (0.6 to 1.4)           | 0.7 (0.4 to 1.0)           | 0.7 (0.4 to 0.9)           | 0.6 (0.3 to 0.8)           | -1.7 (-3.6 to 0.1)                             | -21.5 (-41.4 to 1.1)                |
| Saudi Arabia                                  | 5.6 (3.8 to 7.8)           | 1.9 (1.2 to 2.9)           | 1.8 (1.0 to 2.7)           | 0.9 (0.5 to 1.5)           | -5.6 (-7.2 to -3.6)                            | -56.3 (-65.9 to -42.1)              |
| Sudan                                         | 46.5 (30.6 to 63.2)        | 22.3 (15.2 to 30.9)        | 20.5 (13.7 to 28.8)        | 13.2 (7.5 to 22.1)         | -3.7 (-5.4 to -1.5)                            | -41.6 (-55.4 to -20.1)              |
| Syria                                         | 1.7 (1.2 to 2.2)           | 0.8 (0.6 to 1.2)           | 0.8 (0.3 to 0.9)           | 0.8 (0.3 to 0.9)           | -2.8 (-4.3 to -1.1)                            | -33.7 (-47.4 to -15.5)              |
| Tunisia                                       | 2.3 (1.6 to 3.1)           | 1.3 (1.0 to 2.2)           | 1.4 (0.9 to 2.0)           | 1.1 (0.6 to 1.8)           | -2.3 (-3.9 to -0.6)                            | -28.8 (-44.4 to -9.0)               |
| Turkey                                        | 6.7 (5.0 to 8.8)           | 1.0 (0.7 to 1.4)           | 0.9 (0.6 to 1.2)           | 0.6 (0.3 to 0.9)           | -3.9 (-6.7 to -1.6)                            | -43.5 (-63.2 to -21.4)              |
| United Arab Emirates                          | 4.1 (1.5 to 7.1)           | 3.1 (1.1 to 5.9)           | 3.0 (1.1 to 5.6)           | 2.6 (0.8 to 5.9)           | -1.3 (-3.1 to 0.8)                             | -17.3 (-36.8 to 12.9)               |
| Yemen                                         | 60.0 (41.9 to 78.3)        | 20.2 (13.3 to 29.6)        | 22.0 (15.3 to 30.9)        | 12.2 (7.4 to 19.9)         | -3.4 (-5.0 to -1.6)                            | -39.5 (-52.7 to -21.2)              |
| <b>South Asia</b>                             |                            |                            |                            |                            |                                                |                                     |
| <b>South Asia</b>                             |                            |                            |                            |                            |                                                |                                     |
| Bangladesh                                    | 85.9 (61.8 to 130.6)       | 32.1 (21.8 to 60.3)        | 32.1 (21.4 to 58.7)        | 19.6 (10.8 to 40.6)        | -3.4 (-5.2 to -1.5)                            | -39.6 (-54.1 to -20.6)              |
| Bhutan                                        | 76.7 (38.9 to 115.2)       | 23.8 (11.1 to 38.8)        | 22.4 (10.3 to 36.6)        | 11.2 (4.3 to 22.2)         | -5.3 (-7.0 to -2.8)                            | -53.9 (-64.9 to -34.7)              |
| India                                         | 149.7 (107.7 to 221.0)     | 85.1 (58.6 to 128.7)       | 80.5 (54.0 to 122.5)       | 53.2 (32.0 to 87.0)        | -3.2 (-4.2 to -2.0)                            | -37.9 (-46.5 to -26.4)              |
| Nepal                                         | 131.5 (82.5 to 181.5)      | 64.8 (36.2 to 93.7)        | 61.6 (34.2 to 89.7)        | 40.3 (19.2 to 66.0)        | -3.3 (-4.8 to -1.6)                            | -38.6 (-51.1 to -21.2)              |
| Pakistan                                      | 77.2 (54.1 to 115.9)       | 48.4 (31.3 to 82.5)        | 45.3 (28.8 to 78.2)        | 33.8 (17.4 to 65.8)        | -2.6 (-4.3 to -0.5)                            | -31.3 (-47.2 to -7.6)               |
| <b>Southeast Asia, East Asia, and Oceania</b> |                            |                            |                            |                            |                                                |                                     |
| <b>East Asia</b>                              |                            |                            |                            |                            |                                                |                                     |
| China                                         | 5.6 (4.7 to 6.5)           | 0.9 (0.7 to 1.2)           | 0.7 (0.5 to 1.0)           | 0.2 (0.1 to 0.4)           | -9.3 (-10.4 to -7.6)                           | -75.2 (-79.1 to -68.2)              |
| North Korea                                   | 4.2 (2.6 to 9.3)           | 2.3 (1.5 to 6.0)           | 2.3 (1.4 to 5.7)           | 1.8 (0.9 to 4.1)           | -2.3 (-4.2 to -0.6)                            | -28.6 (-46.6 to -0.6)               |
| Taiwan (Province of China)                    | 0.4 (0.3 to 0.6)           | 0.5 (0.3 to 0.7)           | 0.5 (0.3 to 0.7)           | 0.5 (0.3 to 0.8)           | 0.3 (-0.9 to 1.6)                              | 4.9 (-13.1 to 27.7)                 |
| <b>Oceania</b>                                |                            |                            |                            |                            |                                                |                                     |
| American Samoa                                | 4.3 (2.6 to 7.0)           | 3.4 (1.9 to 5.5)           | 3.4 (1.9 to 5.4)           | 2.9 (1.4 to 5.0)           | -1.3 (-2.8 to 0.4)                             | -17.2 (-34.3 to 6.6)                |
| Federated States of Micronesia                | 27.0 (21.7 to 38.0)        | 6.3 (3.8 to 12.3)          | 6.1 (3.6 to 11.9)          | 4.2 (2.2 to 8.0)           | -2.7 (-4.0 to -1.1)                            | -33.4 (-45.3 to -14.9)              |
| Fiji                                          | 15.5 (10.6 to 26.8)        | 13.5 (8.0 to 21.0)         | 12.9 (7.5 to 20.3)         | 11.6 (5.5 to 19.8)         | -1.1 (-2.9 to 1.0)                             | -14.8 (-35.0 to 15.6)               |
| Guam                                          | 1.1 (0.7 to 1.8)           | 0.9 (0.5 to 1.5)           | 0.9 (0.5 to 1.5)           | 0.8 (0.4 to 1.4)           | -1.0 (-2.2 to 0.3)                             | -13.0 (-27.9 to 4.4)                |
| Kiribati                                      | 97.7 (60.6 to 142.2)       | 63.6 (32.2 to 99.2)        | 62.6 (31.5 to 98.6)        | 50.4 (20.8 to 93.5)        | -1.8 (-3.4 to 0.4)                             | -22.5 (-39.9 to 6.1)                |
| Marshall Islands                              | 26.5 (20.2 to 39.3)        | 8.4 (5.2 to 16.2)          | 8.4 (4.9 to 15.5)          | 5.0 (2.8 to 10.0)          | -3.6 (-4.8 to -2.2)                            | -41.3 (-51.2 to -28.6)              |
| Northern Mariana Islands                      | 1.4 (0.8 to 2.3)           | 1.3 (0.7 to 2.1)           | 1.3 (0.7 to 2.0)           | 1.2 (0.6 to 2.1)           | -0.4 (-1.6 to 1.3)                             | -4.7 (-21.8 to 21.4)                |
| Papua New Guinea                              | 103.8 (73.9 to 160.8)      | 80.3 (55.7 to 125.3)       | 77.8 (53.9 to 122.6)       | 65.0 (42.5 to 103.2)       | -1.4 (-2.4 to -0.1)                            | -19.0 (-30.2 to -1.7)               |
| Samoa                                         | 5.5 (3.1 to 11.1)          | 3.7 (1.8 to 7.9)           | 3.6 (1.7 to 7.6)           | 2.8 (1.2 to 6.1)           | -1.9 (-3.5 to 0.1)                             | -24.2 (-40.8 to 2.0)                |
| Solomon Islands                               | 32.1 (21.6 to 52.8)        | 20.5 (13.6 to 34.6)        | 19.6 (12.9 to 33.9)        | 13.9 (8.7 to 23.7)         | -2.6 (-3.6 to -1.5)                            | -32.1 (-42.0 to -20.5)              |
| Tonga                                         | 8.0 (5.2 to 12.6)          | 4.3 (2.6 to 7.2)           | 4.2 (2.5 to 6.6)           | 2.8 (1.4 to 4.9)           | -3.1 (-4.6 to -1.0)                            | -36.5 (-49.7 to -13.7)              |
| Vanuatu                                       | 39.4 (23.7 to 73.6)        | 25.4 (14.8 to 50.0)        | 24.9 (14.7 to 48.7)        | 19.1 (10.4 to 37.1)        | -1.9 (-3.2 to -0.5)                            | -25.0 (-37.7 to -7.3)               |
| <b>Southeast Asia</b>                         |                            |                            |                            |                            |                                                |                                     |
| Cambodia                                      | 63.6 (45.2 to 86.0)        | 22.8 (14.9 to 34.0)        | 21.9 (14.2 to 32.4)        | 12.7 (6.8 to 22.0)         | -4.1 (-5.7 to -1.9)                            | -45.2 (-57.6 to -24.9)              |
| Indonesia                                     | 60.3 (34.4 to 83.7)        | 40.6 (19.9 to 56.7)        | 39.3 (19.1 to 55.5)        | 29.9 (12.0 to 49.5)        | -2.2 (-3.8 to -0.4)                            | -27.7 (-43.4 to -6.4)               |
| Laos                                          | 65.9 (43.5 to 90.1)        | 35.7 (22.4 to 50.0)        | 33.2 (20.6 to 46.5)        | 33.2 (21.1 to 38.1)        | -3.0 (-4.7 to -1.0)                            | -35.6 (-50.3 to -13.9)              |
| Malaysia                                      | 3.2 (1.9 to 5.3)           | 3.4 (1.9 to 5.2)           | 3.2 (1.6 to 5.0)           | 3.2 (1.6 to 5.2)           | -0.4 (-2.1 to 1.3)                             | -4.5 (-27.4 to 22.2)                |
| Maldives                                      | 5.9 (4.2 to 8.8)           | 1.6 (1.1 to 2.5)           | 1.5 (1.1 to 2.4)           | 0.7 (0.4 to 1.1)           | -5.8 (-7.1 to -4.2)                            | -57.9 (-65.7 to -46.5)              |
| Mauritius                                     | 1.1 (0.8 to 1.7)           | 0.8 (0.5 to 1.3)           | 0.8 (0.5 to 1.3)           | 0.6 (0.3 to 1.0)           | -2.7 (-4.2 to -1.2)                            | -33.0 (-46.6 to -16.6)              |
| Myanmar                                       | 56.0 (39.4 to 78.8)        | 26.0 (18.0 to 37.6)        | 24.1 (16.4 to 35.2)        | 14.5 (8.5 to 22.9)         | -4.0 (-5.5 to -2.3)                            | -44.6 (-56.2 to -29.4)              |
| Philippines                                   | 15.9 (13.0 to 18.7)        | 13.5 (10.4 to 16.8)        | 12.4 (9.4 to 15.5)         | 10.2 (7.1 to 13.7)         | -2.0 (-3.2 to -0.7)                            | -25.0 (-38.2 to -9.8)               |
| Sri Lanka                                     | 11.3 (7.3 to 17.9)         | 4.1 (2.6 to 7.7)           | 3.9 (2.4 to 7.1)           | 2.0 (1.0 to 4.1)           | -5.1 (-7.1 to -3.0)                            | -52.9 (-65.7 to -36.4)              |
| Seychelles                                    | 4.6 (3.2 to 7.0)           | 4.2 (3.0 to 6.1)           | 4.0 (2.8 to 5.9)           | 3.6 (2.2 to 5.9)           | -1.2 (-2.4 to -0.2)                            | -16.5 (-29.8 to -2.3)               |
| Thailand                                      | 8.7 (5.8 to 13.6)          | 6.1 (4.0 to 10.0)          | 6.1 (4.0 to 9.8)           | 5.0 (2.9 to 8.5)           | -1.4 (-3.1 to 0.0)                             | -18.5 (-37.1 to -0.5)               |

|                                                                                                              | Estimate in 2000 (95% UIs) | Estimate in 2015 (95% UIs) | Estimate in 2017 (95% UIs) | Estimate in 2020 (95% UIs) | Annualised rate of change, 2015-2020 (95% UIs) | Percent change, 2015-2020 (95% UIs) |
|--------------------------------------------------------------------------------------------------------------|----------------------------|----------------------------|----------------------------|----------------------------|------------------------------------------------|-------------------------------------|
| Timor-Leste                                                                                                  | 59.9 (22.8 to 62.2)        | 21.6 (12.4 to 33.0)        | 20.9 (12.2 to 32.0)        | 15.4 (7.8 to 26.0)         | -2.4 (-4.1 to -0.2)                            | -29.1 (-45.7 to -2.4)               |
| Vietnam                                                                                                      | 9.2 (5.3 to 13.2)          | 4.1 (2.5 to 5.8)           | 3.9 (2.4 to 5.7)           | 2.5 (1.3 to 4.8)           | -3.6 (-5.4 to -0.7)                            | -40.7 (-55.8 to -10.4)              |
| <b>Sub-Saharan Africa</b>                                                                                    |                            |                            |                            |                            |                                                |                                     |
| <b>Central Sub-Saharan Africa</b>                                                                            |                            |                            |                            |                            |                                                |                                     |
| Angola                                                                                                       | 186.5 (144.3 to 246.2)     | 114.0 (81.6 to 164.8)      | 106.2 (75.7 to 154.2)      | 84.4 (51.3 to 128.8)       | -2.1 (-3.4 to -0.5)                            | -26.4 (-40.0 to -7.2)               |
| Central African Republic                                                                                     | 196.7 (136.1 to 265.5)     | 189.2 (127.4 to 253.0)     | 189.2 (125.8 to 251.5)     | 203.7 (118.8 to 303.0)     | 0.4 (0.1 to 2.1)                               | 7.0 (-14.3 to 36.2)                 |
| Congo                                                                                                        | 129.5 (88.1 to 179.2)      | 93.7 (59.9 to 134.2)       | 88.0 (55.6 to 125.5)       | 70.4 (38.9 to 109.3)       | -2.0 (-3.3 to -0.6)                            | -25.5 (-38.7 to -8.1)               |
| Democratic Republic of the Congo                                                                             | 126.4 (94.0 to 180.3)      | 90.7 (63.3 to 140.5)       | 87.0 (60.5 to 136.2)       | 74.3 (44.8 to 129.3)       | -1.4 (-2.8 to 0.0)                             | -18.8 (-33.8 to 0.3)                |
| Equatorial Guinea                                                                                            | 123.2 (82.4 to 173.9)      | 39.0 (22.9 to 60.5)        | 37.8 (21.9 to 57.9)        | 20.6 (9.5 to 39.1)         | -4.5 (-6.4 to -2.1)                            | -48.3 (-61.9 to -26.8)              |
| Gabon                                                                                                        | 72.9 (47.4 to 102.5)       | 41.1 (25.9 to 57.8)        | 38.9 (24.6 to 54.8)        | 26.7 (14.8 to 42.5)        | -3.0 (-4.2 to -1.5)                            | -35.7 (-46.4 to -19.7)              |
| <b>Eastern Sub-Saharan Africa</b>                                                                            |                            |                            |                            |                            |                                                |                                     |
| Burundi                                                                                                      | 166.0 (115.8 to 227.2)     | 100.3 (68.2 to 144.9)      | 97.6 (65.7 to 142.4)       | 77.3 (46.6 to 120.4)       | -1.8 (-2.9 to -0.5)                            | -23.5 (-35.4 to -7.4)               |
| Comoros                                                                                                      | 144.8 (110.9 to 191.0)     | 68.7 (46.5 to 99.8)        | 66.7 (46.5 to 98.7)        | 48.0 (30.2 to 73.6)        | -2.4 (-3.6 to -1.0)                            | -30.3 (-41.5 to -13.8)              |
| Djibouti                                                                                                     | 103.1 (69.6 to 147.4)      | 48.0 (27.0 to 79.3)        | 46.8 (27.1 to 78.1)        | 32.1 (15.9 to 60.7)        | -2.8 (-4.4 to -1.2)                            | -34.1 (-48.5 to -16.2)              |
| Eritrea                                                                                                      | 211.2 (151.3 to 284.0)     | 140.7 (93.3 to 199.2)      | 133.3 (87.7 to 189.0)      | 101.7 (58.2 to 152.8)      | -2.2 (-3.5 to -0.8)                            | -28.3 (-40.4 to -10.8)              |
| Ethiopia                                                                                                     | 146.4 (106.2 to 197.7)     | 97.4 (71.0 to 138.4)       | 96.2 (69.1 to 137.6)       | 80.0 (51.1 to 118.3)       | -1.4 (-2.6 to -0.3)                            | -18.2 (-32.1 to -4.9)               |
| Kenya                                                                                                        | 130.1 (95.3 to 177.7)      | 88.0 (63.8 to 122.8)       | 86.5 (62.4 to 119.3)       | 65.5 (46.2 to 93.0)        | -2.0 (-2.5 to -1.4)                            | -25.7 (-31.7 to -18.6)              |
| Madagascar                                                                                                   | 146.0 (114.7 to 201.6)     | 129.0 (95.9 to 186.5)      | 126.2 (93.6 to 183.9)      | 121.5 (79.6 to 184.3)      | -0.5 (-1.6 to 0.7)                             | -6.3 (-21.2 to 11.1)                |
| Malawi                                                                                                       | 172.9 (121.1 to 244.4)     | 81.7 (56.4 to 120.2)       | 80.0 (54.5 to 118.9)       | 55.5 (32.5 to 90.2)        | -2.7 (-4.2 to -1.1)                            | -32.8 (-47.1 to -15.7)              |
| Mozambique                                                                                                   | 123.2 (82.6 to 158.1)      | 82.3 (47.0 to 112.5)       | 79.5 (45.3 to 110.0)       | 65.9 (30.2 to 112.5)       | -1.7 (-3.3 to 0.2)                             | -21.6 (-38.7 to 3.3)                |
| Rwanda                                                                                                       | 186.2 (144.2 to 242.3)     | 63.3 (42.4 to 98.5)        | 61.4 (41.1 to 94.6)        | 38.6 (20.8 to 66.4)        | -3.4 (-5.1 to -1.7)                            | -39.9 (-53.6 to -22.3)              |
| Somalia                                                                                                      | 194.8 (144.5 to 264.3)     | 108.9 (73.9 to 159.1)      | 103.4 (70.8 to 153.8)      | 74.9 (45.7 to 119.0)       | -2.5 (-3.9 to -0.8)                            | -30.4 (-44.0 to -11.4)              |
| South Sudan                                                                                                  | 165.0 (115.8 to 225.4)     | 156.4 (112.2 to 216.0)     | 153.4 (108.9 to 212.6)     | 152.4 (100.7 to 217.1)     | -0.2 (-1.4 to 1.1)                             | -2.7 (-18.8 to 17.9)                |
| Tanzania                                                                                                     | 122.6 (87.7 to 174.5)      | 62.5 (41.6 to 99.0)        | 61.2 (40.6 to 96.9)        | 41.9 (23.3 to 77.9)        | -2.9 (-4.5 to -0.9)                            | -34.2 (-49.1 to -12.4)              |
| Uganda                                                                                                       | 108.9 (74.5 to 154.2)      | 67.7 (46.1 to 102.2)       | 65.8 (44.4 to 99.5)        | 52.4 (31.3 to 82.3)        | -1.8 (-3.0 to -0.4)                            | -23.1 (-36.3 to -5.8)               |
| Zambia                                                                                                       | 183.3 (132.1 to 264.9)     | 88.5 (62.5 to 136.1)       | 86.5 (62.5 to 132.5)       | 61.9 (39.9 to 94.2)        | -2.4 (-3.6 to -0.9)                            | -30.3 (-42.0 to -13.2)              |
| <b>Southern Sub-Saharan Africa</b>                                                                           |                            |                            |                            |                            |                                                |                                     |
| Botswana                                                                                                     | 74.0 (45.8 to 111.4)       | 43.0 (28.9 to 60.4)        | 40.3 (27.2 to 57.1)        | 27.2 (16.4 to 41.8)        | -3.1 (-4.8 to -1.3)                            | -36.8 (-51.4 to -17.6)              |
| Lesotho                                                                                                      | 157.9 (107.8 to 224.5)     | 110.4 (75.0 to 157.3)      | 103.6 (70.6 to 147.4)      | 84.5 (51.8 to 133.3)       | -1.9 (-3.1 to -0.2)                            | -23.9 (-37.6 to -2.5)               |
| Namibia                                                                                                      | 90.6 (62.8 to 126.6)       | 51.3 (34.4 to 72.7)        | 48.4 (32.0 to 68.3)        | 33.0 (19.3 to 51.0)        | -3.0 (-4.4 to -1.5)                            | -36.0 (-48.4 to -19.7)              |
| South Africa                                                                                                 | 67.4 (52.6 to 95.4)        | 37.3 (27.7 to 57.0)        | 33.6 (24.6 to 51.7)        | 22.1 (15.2 to 37.0)        | -3.6 (-4.2 to -2.7)                            | -41.3 (-47.0 to -33.0)              |
| Swaziland                                                                                                    | 137.8 (94.8 to 189.4)      | 83.6 (55.7 to 118.4)       | 76.6 (51.1 to 107.7)       | 53.3 (31.7 to 83.2)        | -3.1 (-4.4 to -1.8)                            | -36.6 (-48.5 to -19.3)              |
| Zimbabwe                                                                                                     | 67.4 (45.3 to 88.6)        | 63.6 (43.3 to 84.5)        | 60.5 (41.1 to 80.9)        | 55.4 (34.5 to 81.5)        | -1.0 (-2.1 to 0.2)                             | -13.5 (-27.0 to 3.7)                |
| <b>Western Sub-Saharan Africa</b>                                                                            |                            |                            |                            |                            |                                                |                                     |
| Benin                                                                                                        | 130.7 (94.2 to 181.9)      | 95.4 (67.2 to 140.9)       | 90.6 (65.7 to 134.5)       | 74.4 (48.2 to 114.4)       | -1.7 (-2.9 to -0.5)                            | -22.4 (-34.9 to -7.9)               |
| Burkina Faso                                                                                                 | 180.0 (137.7 to 241.8)     | 94.5 (66.5 to 133.2)       | 93.3 (64.8 to 131.4)       | 67.4 (40.0 to 102.8)       | -2.3 (-3.7 to -0.9)                            | -29.3 (-42.9 to -12.5)              |
| Cameroon                                                                                                     | 153.0 (113.9 to 203.4)     | 78.5 (54.9 to 114.3)       | 75.2 (53.0 to 109.3)       | 50.9 (31.7 to 79.5)        | -3.0 (-4.3 to -1.6)                            | -35.7 (-47.5 to -21.2)              |
| Cape Verde                                                                                                   | 31.1 (23.5 to 43.3)        | 12.6 (9.3 to 17.4)         | 12.2 (9.0 to 17.1)         | 7.6 (5.2 to 10.6)          | -3.4 (-4.4 to -2.2)                            | -39.3 (-48.6 to -28.2)              |
| Chad                                                                                                         | 220.8 (167.9 to 292.7)     | 170.6 (131.4 to 230.0)     | 166.9 (126.5 to 223.4)     | 146.1 (100.1 to 207.9)     | -1.1 (-2.1 to 0.1)                             | -14.6 (-27.0 to 0.9)                |
| Cote d'Ivoire                                                                                                | 107.0 (78.8 to 151.0)      | 75.3 (56.6 to 107.8)       | 70.8 (52.2 to 103.2)       | 55.8 (37.6 to 82.0)        | -2.0 (-3.1 to -0.8)                            | -26.2 (-37.5 to -11.5)              |
| The Gambia                                                                                                   | 106.6 (78.8 to 156.6)      | 59.3 (43.2 to 89.1)        | 57.9 (41.6 to 87.8)        | 42.0 (26.9 to 65.3)        | -2.4 (-3.6 to -0.9)                            | -29.4 (-41.5 to -13.3)              |
| Ghana                                                                                                        | 78.2 (56.2 to 102.5)       | 50.0 (36.9 to 73.2)        | 49.0 (36.0 to 72.5)        | 30.5 (26.0 to 63.8)        | -1.7 (-2.9 to -0.2)                            | -21.6 (-34.9 to -3.7)               |
| Guinea                                                                                                       | 140.3 (106.7 to 194.4)     | 82.3 (60.9 to 118.4)       | 79.8 (58.6 to 116.1)       | 59.3 (39.4 to 90.0)        | -2.2 (-3.4 to -1.0)                            | -28.3 (-40.4 to -14.4)              |
| Guinea-Bissau                                                                                                | 172.4 (129.0 to 238.3)     | 128.7 (90.3 to 188.0)      | 124.0 (86.4 to 181.3)      | 103.8 (65.5 to 155.3)      | -1.5 (-2.6 to -0.2)                            | -19.7 (-32.1 to -3.1)               |
| Liberia                                                                                                      | 180.4 (134.8 to 250.7)     | 98.4 (66.7 to 150.1)       | 95.4 (63.9 to 146.0)       | 76.2 (45.9 to 125.5)       | -1.8 (-3.1 to -0.3)                            | -23.3 (-36.8 to -4.1)               |
| Mali                                                                                                         | 214.1 (157.2 to 294.3)     | 111.5 (73.6 to 175.0)      | 113.0 (75.1 to 175.8)      | 84.2 (47.9 to 139.8)       | -2.0 (-3.4 to -0.4)                            | -25.1 (-40.1 to -6.2)               |
| Mauritania                                                                                                   | 149.7 (105.9 to 201.8)     | 64.5 (44.8 to 97.2)        | 62.4 (43.2 to 94.4)        | 40.8 (25.4 to 65.3)        | -3.1 (-4.4 to -1.8)                            | -37.2 (-48.2 to -23.4)              |
| Niger                                                                                                        | 243.4 (184.1 to 313.2)     | 126.9 (94.1 to 180.8)      | 122.1 (89.9 to 175.0)      | 88.0 (57.3 to 134.1)       | -2.5 (-3.6 to -1.2)                            | -30.9 (-42.0 to -17.0)              |
| Nigeria                                                                                                      | 153.4 (113.6 to 204.2)     | 88.5 (64.3 to 123.3)       | 82.3 (58.8 to 114.5)       | 54.2 (33.8 to 86.6)        | -3.4 (-4.9 to -1.4)                            | -39.2 (-52.0 to -18.7)              |
| Sao Tome and Principe                                                                                        | 72.2 (57.1 to 95.0)        | 34.2 (16.4 to 35.5)        | 23.2 (15.6 to 34.6)        | 13.3 (7.1 to 24.5)         | -4.2 (-6.0 to -2.1)                            | -45.4 (-59.4 to -26.8)              |
| Senegal                                                                                                      | 136.2 (101.2 to 184.9)     | 78.8 (54.7 to 117.1)       | 77.4 (53.5 to 116.3)       | 63.4 (40.1 to 99.5)        | -1.5 (-2.6 to -0.3)                            | -20.0 (-32.2 to -4.1)               |
| Sierra Leone                                                                                                 | 181.9 (126.9 to 235.4)     | 109.8 (71.0 to 155.5)      | 106.1 (68.0 to 150.9)      | 83.2 (47.9 to 134.4)       | -2.0 (-3.4 to -0.5)                            | -25.0 (-39.7 to -7.6)               |
| Togo                                                                                                         | 124.4 (91.3 to 168.1)      | 80.3 (57.3 to 118.9)       | 76.5 (53.9 to 113.8)       | 59.7 (37.9 to 94.7)        | -2.0 (-3.2 to -0.9)                            | -26.2 (-38.0 to -12.5)              |
| <b>Indicator 3.9.3: Age-standardised death rate due to unintentional poisonings (per 100,000 population)</b> |                            |                            |                            |                            |                                                |                                     |
| <b>Central Europe, Eastern Europe, and Central Asia</b>                                                      |                            |                            |                            |                            |                                                |                                     |
| <b>Central Asia</b>                                                                                          |                            |                            |                            |                            |                                                |                                     |
| Armenia                                                                                                      | 1.0 (0.9 to 1.1)           | 0.6 (0.6 to 0.6)           | 0.6 (0.5 to 0.6)           | 0.4 (0.3 to 0.6)           | -2.6 (-4.3 to -0.7)                            | -31.7 (-47.3 to -9.4)               |
| Azerbaijan                                                                                                   | 1.1 (1.0 to 1.7)           | 0.9 (0.7 to 1.3)           | 0.8 (0.7 to 1.3)           | 0.6 (0.4 to 1.0)           | -2.4 (-3.9 to -0.8)                            | -29.7 (-44.1 to -11.9)              |
| Georgia                                                                                                      | 0.6 (0.6 to 0.6)           | 0.8 (0.7 to 0.8)           | 0.8 (0.7 to 0.9)           | 0.5 (0.4 to 0.7)           | -2.4 (-4.1 to -0.7)                            | -29.5 (-45.7 to -10.3)              |
| Kazakhstan                                                                                                   | 4.7 (4.4 to 5.0)           | 2.6 (2.5 to 2.8)           | 2.5 (2.3 to 2.7)           | 1.6 (1.1 to 2.2)           | -3.4 (-5.6 to -1.2)                            | -38.7 (-56.8 to -16.5)              |
| Kyrgyzstan                                                                                                   | 3.3 (3.1 to 3.5)           | 1.4 (1.3 to 1.6)           | 1.4 (1.3 to 1.5)           | 1.1 (0.8 to 1.4)           | -2.3 (-4.3 to -0.3)                            | -28.1 (-47.5 to -4.6)               |
| Mongolia                                                                                                     | 8.8 (5.2 to 10.5)          | 2.8 (2.1 to 4.8)           | 2.7 (2.1 to 4.7)           | 2.6 (1.7 to 4.7)           | 4.6 (-2.1 to 1.0)                              | 7.3 (-27.0 to 16.9)                 |
| Tajikistan                                                                                                   | 1.8 (1.2 to 2.1)           | 0.7 (0.5 to 1.6)           | 0.7 (0.4 to 1.6)           | 0.5 (0.3 to 1.1)           | -3.3 (-5.0 to -1.6)                            | -38.7 (-52.6 to -20.8)              |
| Turkmenistan                                                                                                 | 1.2 (1.1 to 1.3)           | 0.6 (0.5 to 0.6)           | 0.6 (0.5 to 0.7)           | 0.4 (0.3 to 0.6)           | -2.3 (-4.1 to -0.3)                            | -28.8 (-46.0 to -5.0)               |
| Uzbekistan                                                                                                   | 1.5 (1.4 to 1.6)           | 1.1 (1.0 to 1.2)           | 1.1 (1.0 to 1.2)           | 0.7 (0.5 to 0.8)           | -3.8 (-5.3 to -2.1)                            | -42.9 (-54.8 to -27.1)              |
| <b>Central Europe</b>                                                                                        |                            |                            |                            |                            |                                                |                                     |
| Albania                                                                                                      | 0.7 (0.5 to 0.8)           | 0.4 (0.3 to 0.5)           | 0.4 (0.3 to 0.5)           | 0.3 (0.2 to 0.4)           | -2.3 (-4.0 to -0.7)                            | -28.6 (-44.8 to -10.6)              |
| Bosnia and Herzegovina                                                                                       | 0.9 (0.8 to 1.2)           | 0.5 (0.3 to 0.9)           | 0.5 (0.3 to 0.9)           | 0.4 (0.3 to 0.9)           | -0.4 (-1.6 to 0.9)                             | -6.0 (-21.4 to 13.8)                |
| Bulgaria                                                                                                     | 1.2 (1.1 to 1.3)           | 0.5 (0.4 to 0.5)           | 0.5 (0.4 to 0.5)           | 0.3 (0.2 to 0.4)           | -3.1 (-5.0 to -1.0)                            | -36.9 (-52.9 to -13.9)              |
| Croatia                                                                                                      | 0.6 (0.5 to 0.6)           | 0.3 (0.3 to 0.3)           | 0.3 (0.3 to 0.3)           | 0.2 (0.2 to 0.3)           | -2.9 (-4.3 to -1.4)                            | -35.0 (-47.4 to -19.3)              |
| Czech Republic                                                                                               | 1.0 (0.9 to 1.0)           | 0.6 (0.5 to 0.6)           | 0.6 (0.5 to 0.6)           | 0.4 (0.3 to 0.5)           | -3.1 (-4.4 to -1.6)                            | -36.4 (-48.7 to -21.0)              |
| Hungary                                                                                                      | 0.6 (0.6 to 0.6)           | 0.4 (0.4 to 0.5)           | 0.4 (0.3 to 0.4)           | 0.2 (0.2 to 0.3)           | -4.4 (-6.3 to -2.3)                            | -47.7 (-61.2 to -29.5)              |
| Macedonia                                                                                                    | 0.4 (0.3 to 0.5)           | 0.3 (0.2 to 0.4)           | 0.3 (0.2 to 0.4)           | 0.2 (0.1 to 0.3)           | -2.9 (-4.3 to -1.5)                            | -34.5 (-47.3 to -20.3)              |
| Montenegro                                                                                                   | 0.9 (0.7 to 1.0)           | 0.6 (0.5 to 0.7)           | 0.6 (0.5 to 0.7)           | 0.4 (0.3 to 0.5)           | -2.5 (-4.0 to -0.9)                            | -30.9 (-45.0 to -12.2)              |
| Poland                                                                                                       | 1.1 (1.0 to 1.1)           | 0.5 (0.5 to 0.5)           | 0.5 (0.4 to 0.5)           | 0.2 (0.2 to 0.3)           | -4.2 (-5.5 to -3.0)                            | -46.7 (-56.2 to -35.8)              |
| Romania                                                                                                      | 3.4 (3.2 to 3.5)           | 1.3 (1.2 to 1.4)           | 1.3 (1.2 to 1.4)           | 0.7 (0.5 to 0.9)           | -4.4 (-6.4 to -2.2)                            | -48.0 (-61.8 to -28.0)              |
| Serbia                                                                                                       | 0.6 (0.5 to 0.7)           | 0.3 (0.3 to 0.5)           | 0.3 (0.3 to 0.5)           | 0.3 (0.2 to 0.4)           | -2.0 (-3.7 to -0.1)                            | -25.7 (-42.9 to -2.1)               |
| Slovakia                                                                                                     | 0.7 (0.6 to 0.9)           | 0.5 (0.5 to 0.7)           | 0.5 (0.4 to 0.6)           | 0.3 (0.2 to 0.5)           | -3.2 (-4.7 to -1.6)                            | -38.0 (-50.6 to -21.9)              |
| Slovenia                                                                                                     | 0.5 (0.5 to 0.6)           | 0.2 (0.2 to 0.2)           | 0.2 (0.2 to 0.2)           | 0.1 (0.1 to 0.1)           | -3.5 (-5.0 to -1.9)                            | -40.0 (-52.6 to -24.6)              |
| <b>Eastern Europe</b>                                                                                        |                            |                            |                            |                            |                                                |                                     |

|                                    | Estimate in 2000 (95% UIs) | Estimate in 2015 (95% UIs) | Estimate in 2017 (95% UIs) | Estimate in 2020 (95% UIs) | Annualised rate of change, 2015-2020 (95% UIs) | Percent change, 2015-2020 (95% UIs) |
|------------------------------------|----------------------------|----------------------------|----------------------------|----------------------------|------------------------------------------------|-------------------------------------|
| Belarus                            | 6.6 (6.3 to 7.0)           | 2.5 (2.2 to 2.7)           | 2.3 (2.1 to 2.6)           | 1.4 (1.0 to 1.9)           | -3.8 (-5.7 to -1.9)                            | -42.9 (-57.4 to -24.4)              |
| Estonia                            | 1.7 (1.5 to 1.9)           | 0.5 (0.4 to 0.5)           | 0.5 (0.4 to 0.6)           | 0.3 (0.2 to 0.5)           | -2.4 (-3.3 to 0.5)                             | -28.9 (-44.7 to 7.8)                |
| Latvia                             | 2.7 (2.5 to 2.9)           | 0.8 (0.8 to 0.9)           | 0.9 (0.8 to 1.0)           | 0.6 (0.4 to 0.9)           | -2.4 (-3.3 to 0.7)                             | -28.2 (-44.6 to 11.7)               |
| Lithuania                          | 3.8 (3.6 to 4.0)           | 2.5 (2.4 to 2.7)           | 2.4 (2.2 to 2.7)           | 1.9 (1.3 to 2.6)           | -2.1 (-4.2 to 0.3)                             | -25.4 (-46.6 to 4.0)                |
| Moldova                            | 5.5 (5.3 to 5.9)           | 4.3 (4.1 to 4.5)           | 3.9 (3.6 to 4.1)           | 4.2 (3.1 to 5.7)           | -0.2 (-2.1 to 1.8)                             | -2.3 (-26.6 to 31.3)                |
| Russia                             | 7.7 (7.5 to 7.8)           | 3.8 (3.7 to 3.9)           | 3.5 (3.4 to 3.6)           | 2.1 (1.4 to 3.1)           | -3.9 (-6.6 to -1.3)                            | -43.4 (-62.6 to -17.7)              |
| Ukraine                            | 6.3 (6.1 to 6.6)           | 2.8 (2.6 to 3.0)           | 2.5 (2.4 to 2.8)           | 1.9 (1.2 to 2.7)           | -2.9 (-5.6 to -0.3)                            | -33.8 (-56.6 to -4.5)               |
| <b>High-income</b>                 |                            |                            |                            |                            |                                                |                                     |
| <b>Australasia</b>                 |                            |                            |                            |                            |                                                |                                     |
| Australia                          | 0.3 (0.3 to 0.3)           | 0.2 (0.2 to 0.2)           | 0.2 (0.2 to 0.2)           | 0.1 (0.1 to 0.1)           | -3.6 (-4.9 to -2.4)                            | -41.3 (-51.8 to -29.8)              |
| New Zealand                        | 0.2 (0.2 to 0.2)           | 0.2 (0.2 to 0.2)           | 0.2 (0.2 to 0.2)           | 0.1 (0.1 to 0.1)           | -4.4 (-5.4 to -3.4)                            | -48.3 (-55.8 to -39.9)              |
| <b>High-income Asia Pacific</b>    |                            |                            |                            |                            |                                                |                                     |
| Bhunei                             | 0.6 (0.5 to 0.7)           | 0.5 (0.4 to 0.7)           | 0.5 (0.4 to 0.7)           | 0.3 (0.2 to 0.4)           | -2.9 (-4.2 to -1.3)                            | -35.1 (-46.4 to -18.1)              |
| Japan                              | 0.3 (0.3 to 0.3)           | 0.2 (0.2 to 0.2)           | 0.2 (0.2 to 0.2)           | 0.1 (0.1 to 0.2)           | -3.6 (-4.7 to -2.3)                            | -41.4 (-50.9 to -29.0)              |
| South Korea                        | 0.9 (0.9 to 0.9)           | 0.3 (0.3 to 0.3)           | 0.3 (0.3 to 0.3)           | 0.2 (0.2 to 0.2)           | -3.0 (-4.1 to -1.8)                            | -35.6 (-45.8 to -23.3)              |
| Singapore                          | 0.1 (0.1 to 0.1)           | 0.1 (0.1 to 0.1)           | 0.1 (0.1 to 0.1)           | 0.0 (0.0 to 0.0)           | -2.9 (-4.2 to -1.7)                            | -35.3 (-46.7 to -23.0)              |
| <b>High-income North America</b>   |                            |                            |                            |                            |                                                |                                     |
| Canada                             | 0.4 (0.4 to 0.4)           | 0.3 (0.3 to 0.4)           | 0.3 (0.3 to 0.3)           | 0.2 (0.2 to 0.3)           | -3.0 (-4.0 to -1.8)                            | -36.1 (-45.5 to -23.5)              |
| Greenland                          | 1.7 (1.4 to 2.0)           | 1.2 (1.0 to 1.4)           | 1.1 (0.9 to 1.4)           | 0.8 (0.6 to 1.2)           | -2.1 (-3.8 to -0.2)                            | -26.6 (-43.5 to -2.8)               |
| United States                      | 0.4 (0.4 to 0.4)           | 0.5 (0.5 to 0.5)           | 0.5 (0.5 to 0.5)           | 0.5 (0.2 to 0.4)           | -3.3 (-4.8 to -1.9)                            | -39.1 (-51.0 to -25.1)              |
| <b>Southern Latin America</b>      |                            |                            |                            |                            |                                                |                                     |
| Argentina                          | 1.0 (0.9 to 1.0)           | 0.8 (0.7 to 0.8)           | 0.8 (0.7 to 0.8)           | 0.5 (0.4 to 0.6)           | -2.6 (-3.6 to -1.5)                            | -32.2 (-42.0 to -20.5)              |
| Chile                              | 0.5 (0.5 to 0.6)           | 0.3 (0.3 to 0.3)           | 0.3 (0.2 to 0.3)           | 0.2 (0.2 to 0.3)           | -1.9 (-3.1 to -0.6)                            | -24.5 (-37.1 to -8.4)               |
| Uruguay                            | 0.8 (0.7 to 0.8)           | 0.6 (0.5 to 0.6)           | 0.6 (0.5 to 0.6)           | 0.4 (0.3 to 0.5)           | -2.1 (-3.3 to -0.8)                            | -26.4 (-39.1 to -11.3)              |
| <b>Western Europe</b>              |                            |                            |                            |                            |                                                |                                     |
| Andorra                            | 0.3 (0.2 to 0.3)           | 0.2 (0.2 to 0.3)           | 0.2 (0.2 to 0.3)           | 0.1 (0.1 to 0.2)           | -2.8 (-3.7 to -1.8)                            | -33.7 (-42.5 to -23.4)              |
| Austria                            | 0.2 (0.2 to 0.2)           | 0.3 (0.3 to 0.3)           | 0.3 (0.2 to 0.3)           | 0.1 (0.1 to 0.2)           | -4.3 (-5.5 to -3.2)                            | -47.7 (-56.2 to -37.8)              |
| Belgium                            | 0.5 (0.5 to 0.5)           | 0.3 (0.3 to 0.3)           | 0.3 (0.2 to 0.3)           | 0.2 (0.2 to 0.2)           | -2.6 (-3.6 to -1.4)                            | -31.6 (-41.6 to -19.2)              |
| Cyprus                             | 0.3 (0.2 to 0.3)           | 0.2 (0.1 to 0.2)           | 0.2 (0.1 to 0.2)           | 0.1 (0.1 to 0.1)           | -3.3 (-4.7 to -1.8)                            | -38.8 (-50.3 to -23.8)              |
| Denmark                            | 0.3 (0.3 to 0.3)           | 0.2 (0.1 to 0.2)           | 0.2 (0.1 to 0.2)           | 0.1 (0.1 to 0.1)           | -2.8 (-4.3 to -1.1)                            | -33.9 (-47.7 to -15.2)              |
| Finland                            | 0.5 (0.5 to 0.5)           | 0.2 (0.2 to 0.2)           | 0.2 (0.2 to 0.2)           | 0.2 (0.1 to 0.2)           | -1.2 (-2.7 to 0.2)                             | -15.9 (-32.9 to 3.7)                |
| France                             | 0.3 (0.3 to 0.4)           | 0.3 (0.2 to 0.3)           | 0.2 (0.2 to 0.3)           | 0.1 (0.1 to 0.2)           | -3.7 (-4.6 to -2.6)                            | -42.0 (-50.2 to -32.2)              |
| Germany                            | 0.1 (0.1 to 0.1)           | 0.1 (0.1 to 0.1)           | 0.1 (0.1 to 0.1)           | 0.1 (0.1 to 0.1)           | -3.9 (-5.1 to -2.6)                            | -44.1 (-53.5 to -31.9)              |
| Greece                             | 0.3 (0.3 to 0.3)           | 0.1 (0.1 to 0.2)           | 0.2 (0.1 to 0.2)           | 0.1 (0.1 to 0.1)           | -2.4 (-3.4 to -1.2)                            | -29.6 (-40.3 to -17.0)              |
| Iceland                            | 0.3 (0.3 to 0.3)           | 0.3 (0.2 to 0.3)           | 0.3 (0.2 to 0.3)           | 0.2 (0.1 to 0.2)           | -2.0 (-3.4 to -0.4)                            | -24.9 (-40.2 to -5.3)               |
| Ireland                            | 0.3 (0.3 to 0.4)           | 0.2 (0.2 to 0.2)           | 0.2 (0.2 to 0.2)           | 0.1 (0.1 to 0.1)           | -3.2 (-4.4 to -2.0)                            | -37.9 (-47.9 to -25.4)              |
| Israel                             | 0.2 (0.2 to 0.2)           | 0.1 (0.1 to 0.1)           | 0.1 (0.1 to 0.1)           | 0.1 (-0.4 to -2.6)         | -4.1 (-5.4 to -2.6)                            | -45.7 (-55.7 to -32.8)              |
| Italy                              | 0.2 (0.2 to 0.3)           | 0.1 (0.1 to 0.1)           | 0.1 (0.1 to 0.1)           | 0.1 (0.1 to 0.1)           | -2.4 (-3.3 to -1.5)                            | -30.2 (-39.0 to -20.2)              |
| Luxembourg                         | 0.2 (0.2 to 0.3)           | 0.1 (0.1 to 0.2)           | 0.1 (0.1 to 0.2)           | 0.1 (0.1 to 0.1)           | -2.1 (-3.7 to -0.5)                            | -26.2 (-42.2 to -6.7)               |
| Malta                              | 0.2 (0.1 to 0.2)           | 0.1 (0.1 to 0.1)           | 0.1 (0.1 to 0.1)           | 0.1 (0.1 to 0.1)           | -3.6 (-4.8 to -2.1)                            | -41.0 (-51.6 to -26.7)              |
| Netherlands                        | 0.1 (0.1 to 0.1)           | 0.1 (0.1 to 0.1)           | 0.1 (0.1 to 0.1)           | 0.1 (0.1 to 0.1)           | -3.2 (-4.1 to -2.3)                            | -38.1 (-46.2 to -28.9)              |
| Norway                             | 0.5 (0.5 to 0.6)           | 0.9 (0.8 to 1.0)           | 0.9 (0.8 to 1.0)           | 0.5 (0.4 to 0.5)           | -4.4 (-5.4 to -3.4)                            | -47.9 (-55.3 to -39.9)              |
| Portugal                           | 0.4 (0.4 to 0.4)           | 0.2 (0.2 to 0.2)           | 0.2 (0.2 to 0.2)           | 0.1 (0.1 to 0.1)           | -3.4 (-4.7 to -2.2)                            | -39.7 (-50.4 to -27.6)              |
| Spain                              | 0.3 (0.3 to 0.3)           | 0.2 (0.2 to 0.2)           | 0.2 (0.2 to 0.2)           | 0.1 (0.1 to 0.1)           | -3.6 (-4.8 to -2.1)                            | -41.3 (-51.0 to -27.1)              |
| Sweden                             | 0.3 (0.3 to 0.3)           | 0.3 (0.3 to 0.3)           | 0.3 (0.3 to 0.3)           | 0.2 (0.1 to 0.2)           | -4.1 (-5.2 to -2.9)                            | -45.9 (-54.4 to -35.1)              |
| Switzerland                        | 0.1 (0.1 to 0.2)           | 0.1 (0.1 to 0.1)           | 0.1 (0.1 to 0.1)           | 0.1 (0.1 to 0.1)           | -3.9 (-5.2 to -2.4)                            | -43.8 (-54.3 to -30.4)              |
| United Kingdom                     | 0.4 (0.4 to 0.4)           | 0.2 (0.2 to 0.2)           | 0.2 (0.2 to 0.2)           | 0.1 (0.1 to 0.1)           | -3.2 (-4.2 to -2.2)                            | -38.1 (-46.6 to -28.0)              |
| <b>Latin America and Caribbean</b> |                            |                            |                            |                            |                                                |                                     |
| <b>Andean Latin America</b>        |                            |                            |                            |                            |                                                |                                     |
| Bolivia                            | 1.5 (0.9 to 1.9)           | 0.9 (0.7 to 1.2)           | 0.8 (0.6 to 1.1)           | 0.6 (0.4 to 0.8)           | -3.3 (-4.1 to -2.3)                            | -38.5 (-45.8 to -29.6)              |
| Ecuador                            | 0.9 (0.9 to 1.0)           | 0.7 (0.6 to 0.7)           | 0.6 (0.6 to 0.7)           | 0.4 (0.4 to 0.5)           | -2.6 (-3.5 to -1.8)                            | -32.6 (-41.2 to -23.1)              |
| Peru                               | 1.2 (0.9 to 1.4)           | 0.7 (0.6 to 0.9)           | 0.7 (0.5 to 0.9)           | 0.4 (0.3 to 0.6)           | -3.2 (-4.6 to -1.8)                            | -38.2 (-50.2 to -24.2)              |
| <b>Caribbean</b>                   |                            |                            |                            |                            |                                                |                                     |
| Antigua and Barbuda                | 0.6 (0.6 to 0.7)           | 0.5 (0.4 to 0.6)           | 0.5 (0.4 to 0.6)           | 0.4 (0.3 to 0.5)           | -1.7 (-2.9 to -0.4)                            | -22.1 (-34.9 to -6.1)               |
| The Bahamas                        | 0.4 (0.4 to 0.4)           | 0.3 (0.3 to 0.3)           | 0.3 (0.2 to 0.3)           | 0.2 (0.2 to 0.3)           | -1.7 (-2.9 to -0.4)                            | -22.3 (-34.9 to -5.3)               |
| Barbados                           | 0.3 (0.2 to 0.3)           | 0.2 (0.2 to 0.2)           | 0.2 (0.2 to 0.2)           | 0.1 (0.1 to 0.2)           | -1.6 (-2.6 to -0.7)                            | -21.5 (-31.9 to -9.6)               |
| Belize                             | 1.1 (1.0 to 1.2)           | 0.6 (0.6 to 0.7)           | 0.6 (0.6 to 0.7)           | 0.5 (0.4 to 0.6)           | -2.0 (-3.1 to -0.7)                            | -26.0 (-37.7 to -10.6)              |
| Bermuda                            | 0.4 (0.3 to 0.4)           | 0.2 (0.2 to 0.2)           | 0.2 (0.2 to 0.2)           | 0.1 (0.1 to 0.2)           | -2.2 (-4.9 to 1.1)                             | -26.2 (-52.1 to 17.8)               |
| Cuba                               | 0.4 (0.3 to 0.4)           | 0.2 (0.2 to 0.2)           | 0.2 (0.2 to 0.2)           | 0.2 (0.1 to 0.2)           | -2.5 (-3.5 to -1.4)                            | -30.6 (-40.4 to -18.9)              |
| Dominica                           | 1.7 (1.6 to 1.9)           | 1.4 (1.2 to 1.5)           | 1.4 (1.2 to 1.6)           | 1.1 (0.9 to 1.4)           | -1.6 (-2.7 to -0.3)                            | -20.6 (-33.2 to -4.9)               |
| Dominican Republic                 | 0.4 (0.4 to 0.7)           | 0.4 (0.3 to 0.6)           | 0.4 (0.3 to 0.6)           | 0.3 (0.2 to 0.5)           | -2.2 (-3.3 to -1.1)                            | -28.1 (-39.4 to -15.4)              |
| Grenada                            | 0.7 (0.7 to 0.8)           | 0.5 (0.4 to 0.5)           | 0.5 (0.4 to 0.5)           | 0.3 (0.3 to 0.4)           | -2.0 (-2.9 to -1.0)                            | -25.3 (-34.9 to -14.5)              |
| Guyana                             | 0.8 (0.7 to 0.8)           | 0.5 (0.5 to 0.6)           | 0.5 (0.5 to 0.6)           | 0.4 (0.3 to 0.5)           | -2.4 (-3.8 to -1.0)                            | -30.1 (-43.5 to -13.8)              |
| Haiti                              | 1.5 (0.5 to 2.2)           | 1.0 (0.4 to 1.4)           | 0.9 (0.4 to 1.3)           | 0.6 (0.3 to 0.9)           | -2.8 (-3.8 to -1.8)                            | -33.9 (-43.4 to -23.6)              |
| Jamaica                            | 0.3 (0.3 to 0.3)           | 0.3 (0.2 to 0.3)           | 0.3 (0.2 to 0.3)           | 0.2 (0.2 to 0.3)           | -2.3 (-3.4 to -1.2)                            | -29.3 (-40.3 to -16.6)              |
| Puerto Rico                        | 0.3 (0.3 to 0.3)           | 0.2 (0.2 to 0.2)           | 0.2 (0.2 to 0.2)           | 0.1 (0.1 to 0.2)           | -1.9 (-3.3 to -0.4)                            | -24.8 (-38.8 to -6.3)               |
| Saint Lucia                        | 0.4 (0.3 to 0.4)           | 0.2 (0.2 to 0.3)           | 0.2 (0.2 to 0.3)           | 0.2 (0.2 to 0.2)           | -1.9 (-2.8 to -1.0)                            | -25.1 (-34.7 to -13.4)              |
| Saint Vincent and the Grenadines   | 0.3 (0.3 to 0.4)           | 0.2 (0.2 to 0.3)           | 0.2 (0.2 to 0.3)           | 0.2 (0.2 to 0.2)           | -1.6 (-2.6 to -0.4)                            | -20.7 (-31.8 to -5.9)               |
| Suriname                           | 0.6 (0.6 to 0.7)           | 0.5 (0.4 to 0.5)           | 0.5 (0.4 to 0.5)           | 0.3 (0.3 to 0.4)           | -1.7 (-2.5 to -0.8)                            | -22.5 (-31.4 to -11.6)              |
| Trinidad and Tobago                | 0.3 (0.3 to 0.3)           | 0.2 (0.2 to 0.2)           | 0.2 (0.2 to 0.2)           | 0.2 (0.1 to 0.2)           | -1.1 (-2.3 to 0.1)                             | -15.3 (-28.9 to 1.3)                |
| Virgin Islands, U.S.               | 0.5 (0.5 to 0.6)           | 0.4 (0.3 to 0.4)           | 0.4 (0.3 to 0.4)           | 0.2 (0.2 to 0.3)           | -2.9 (-4.1 to -1.6)                            | -35.3 (-45.7 to -21.1)              |
| <b>Central Latin America</b>       |                            |                            |                            |                            |                                                |                                     |
| Colombia                           | 0.3 (0.3 to 0.3)           | 0.2 (0.2 to 0.2)           | 0.2 (0.2 to 0.2)           | 0.1 (0.1 to 0.2)           | -2.4 (-3.7 to -1.0)                            | -29.7 (-42.4 to -14.0)              |
| Costa Rica                         | 0.3 (0.3 to 0.3)           | 0.3 (0.2 to 0.3)           | 0.3 (0.2 to 0.3)           | 0.2 (0.2 to 0.2)           | -2.5 (-3.5 to -1.4)                            | -30.7 (-40.7 to -19.2)              |
| El Salvador                        | 0.4 (0.2 to 0.5)           | 0.2 (0.2 to 0.3)           | 0.2 (0.2 to 0.3)           | 0.2 (0.1 to 0.2)           | -2.1 (-3.2 to -1.0)                            | -27.0 (-38.5 to -13.6)              |
| Guatemala                          | 1.3 (1.2 to 1.4)           | 1.5 (1.4 to 1.6)           | 1.5 (1.3 to 1.7)           | 0.9 (0.8 to 1.1)           | -3.4 (-4.6 to -2.2)                            | -39.4 (-49.5 to -27.6)              |
| Honduras                           | 1.6 (1.0 to 2.2)           | 1.1 (0.7 to 1.6)           | 1.1 (0.7 to 1.6)           | 0.7 (0.4 to 1.1)           | -3.0 (-3.8 to -2.1)                            | -36.5 (-43.8 to -27.5)              |
| Mexico                             | 0.8 (0.8 to 0.8)           | 0.6 (0.6 to 0.6)           | 0.6 (0.5 to 0.6)           | 0.4 (0.4 to 0.5)           | -1.9 (-2.8 to -1.0)                            | -25.0 (-34.0 to -13.3)              |
| Nicaragua                          | 0.7 (0.5 to 0.8)           | 0.4 (0.3 to 0.6)           | 0.4 (0.3 to 0.5)           | 0.2 (0.2 to 0.3)           | -3.2 (-4.3 to -2.0)                            | -37.8 (-47.2 to -25.7)              |
| Panama                             | 0.6 (0.5 to 0.6)           | 0.3 (0.3 to 0.4)           | 0.3 (0.3 to 0.4)           | 0.2 (0.2 to 0.3)           | -2.3 (-3.2 to -1.3)                            | -28.8 (-38.5 to -17.8)              |

|                                               | Estimate in 2000 (95% UIs) | Estimate in 2015 (95% UIs) | Estimate in 2017 (95% UIs) | Estimate in 2020 (95% UIs) | Annualised rate of change, 2015-2020 (95% UIs) | Percent change, 2015-2020 (95% UIs) |
|-----------------------------------------------|----------------------------|----------------------------|----------------------------|----------------------------|------------------------------------------------|-------------------------------------|
| Venezuela                                     | 0.5 (0.5 to 0.5)           | 0.3 (0.3 to 0.4)           | 0.3 (0.3 to 0.4)           | 0.3 (0.2 to 0.3)           | -1.9 (-3.3 to -0.4)                            | -24.2 (-39.3 to -5.5)               |
| <b>Tropical Latin America</b>                 |                            |                            |                            |                            |                                                |                                     |
| Brazil                                        | 0.3 (0.3 to 0.3)           | 0.2 (0.2 to 0.2)           | 0.2 (0.2 to 0.2)           | 0.1 (0.1 to 0.1)           | -2.7 (-3.6 to -1.8)                            | -32.9 (-41.9 to -24.0)              |
| Paraguay                                      | 0.4 (0.3 to 0.5)           | 0.2 (0.2 to 0.4)           | 0.2 (0.2 to 0.4)           | 0.2 (0.1 to 0.3)           | -2.1 (-3.4 to -0.8)                            | -26.2 (-39.6 to -10.7)              |
| <b>North Africa and Middle East</b>           |                            |                            |                            |                            |                                                |                                     |
| <b>North Africa and Middle East</b>           |                            |                            |                            |                            |                                                |                                     |
| Afghanistan                                   | 1.8 (1.1 to 2.4)           | 1.4 (0.8 to 1.9)           | 1.3 (0.8 to 1.8)           | 0.8 (0.5 to 1.2)           | -3.4 (-4.2 to -2.5)                            | -39.7 (-46.7 to -31.3)              |
| Algeria                                       | 1.3 (0.5 to 1.6)           | 0.9 (0.3 to 1.3)           | 0.9 (0.3 to 1.3)           | 0.6 (0.2 to 0.8)           | -3.4 (-4.1 to -2.6)                            | -39.5 (-45.6 to -32.5)              |
| Bahrain                                       | 0.2 (0.2 to 0.3)           | 0.2 (0.1 to 0.2)           | 0.1 (0.1 to 0.2)           | 0.1 (0.1 to 0.2)           | -2.3 (-3.6 to -0.9)                            | -28.6 (-41.4 to -12.9)              |
| Egypt                                         | 0.3 (0.2 to 0.4)           | 0.3 (0.2 to 0.4)           | 0.3 (0.2 to 0.4)           | 0.2 (0.1 to 0.2)           | -3.6 (-4.8 to -2.5)                            | -41.6 (-51.0 to -31.5)              |
| Iran                                          | 1.9 (1.4 to 2.2)           | 1.2 (1.0 to 1.4)           | 1.2 (0.9 to 1.3)           | 0.8 (0.6 to 1.0)           | -2.6 (-3.6 to -1.6)                            | -31.6 (-42.0 to -21.1)              |
| Iraq                                          | 0.6 (0.4 to 0.8)           | 0.3 (0.2 to 0.3)           | 0.3 (0.2 to 0.3)           | 0.2 (0.1 to 0.2)           | -4.0 (-4.7 to -3.2)                            | -44.9 (-50.9 to -37.7)              |
| Jordan                                        | 1.4 (0.9 to 1.8)           | 0.7 (0.5 to 0.8)           | 0.7 (0.5 to 0.8)           | 0.5 (0.4 to 0.6)           | -2.3 (-3.2 to -1.4)                            | -29.2 (-37.8 to -18.8)              |
| Kuwait                                        | 0.7 (0.6 to 0.7)           | 0.4 (0.4 to 0.4)           | 0.4 (0.3 to 0.4)           | 0.3 (0.2 to 0.4)           | -2.8 (-5.0 to -0.3)                            | -33.4 (-52.9 to -4.2)               |
| Lebanon                                       | 0.9 (0.3 to 1.3)           | 0.7 (0.2 to 1.1)           | 0.7 (0.2 to 1.0)           | 0.4 (0.1 to 0.7)           | -2.7 (-3.7 to -1.6)                            | -33.3 (-43.0 to -21.8)              |
| Libya                                         | 1.2 (0.4 to 1.7)           | 1.1 (0.4 to 1.5)           | 1.1 (0.4 to 1.5)           | 0.8 (0.3 to 1.2)           | -1.8 (-2.6 to -0.6)                            | -23.1 (-31.9 to -9.2)               |
| Morocco                                       | 1.5 (0.5 to 2.0)           | 1.2 (0.4 to 1.6)           | 1.1 (0.4 to 1.6)           | 0.7 (0.2 to 1.0)           | -3.4 (-4.0 to -2.7)                            | -39.6 (-45.1 to -33.1)              |
| Palestine                                     | 0.3 (0.2 to 0.5)           | 0.2 (0.1 to 0.3)           | 0.2 (0.1 to 0.3)           | 0.1 (0.1 to 0.2)           | -2.1 (-3.6 to -0.2)                            | -26.9 (-41.7 to -3.1)               |
| Oman                                          | 0.8 (0.2 to 1.2)           | 0.6 (0.2 to 1.0)           | 0.6 (0.2 to 1.0)           | 0.4 (0.1 to 0.8)           | -2.5 (-3.9 to -1.0)                            | -30.5 (-44.6 to -13.8)              |
| Qatar                                         | 0.3 (0.2 to 0.4)           | 0.3 (0.2 to 0.4)           | 0.3 (0.2 to 0.4)           | 0.2 (0.1 to 0.3)           | -3.6 (-5.1 to -1.9)                            | -41.4 (-53.7 to -24.6)              |
| Saudi Arabia                                  | 1.0 (0.7 to 1.2)           | 0.8 (0.5 to 1.1)           | 0.8 (0.5 to 1.1)           | 0.4 (0.2 to 0.6)           | -4.3 (-5.7 to -3.1)                            | -47.7 (-57.5 to -37.2)              |
| Sudan                                         | 2.1 (0.7 to 3.5)           | 1.5 (0.5 to 2.1)           | 1.4 (0.5 to 2.0)           | 0.8 (0.3 to 1.1)           | -4.4 (-5.3 to -3.4)                            | -48.0 (-55.1 to -40.1)              |
| Syria                                         | 0.7 (0.6 to 0.8)           | 0.5 (0.4 to 0.6)           | 0.5 (0.4 to 0.6)           | 0.3 (0.2 to 0.4)           | -3.0 (-3.9 to -2.2)                            | -36.4 (-44.6 to -27.7)              |
| Tunisia                                       | 1.0 (0.3 to 1.4)           | 0.7 (0.2 to 1.1)           | 0.7 (0.2 to 1.1)           | 0.4 (0.1 to 0.7)           | -3.0 (-3.8 to -2.2)                            | -36.1 (-43.4 to -28.3)              |
| Turkey                                        | 0.5 (0.4 to 0.8)           | 0.6 (0.3 to 0.7)           | 0.5 (0.3 to 0.6)           | 0.3 (0.2 to 0.5)           | -3.4 (-4.7 to -2.0)                            | -39.5 (-50.8 to -25.8)              |
| United Arab Emirates                          | 0.2 (0.1 to 0.3)           | 0.2 (0.1 to 0.3)           | 0.2 (0.1 to 0.3)           | 0.1 (0.1 to 0.2)           | -4.4 (-5.4 to -3.3)                            | -48.3 (-55.6 to -39.3)              |
| Yemen                                         | 2.1 (0.7 to 3.4)           | 1.6 (0.5 to 2.4)           | 1.6 (0.5 to 2.5)           | 1.0 (0.3 to 1.6)           | -2.9 (-3.7 to -2.1)                            | -35.3 (-42.5 to -27.4)              |
| <b>South Asia</b>                             |                            |                            |                            |                            |                                                |                                     |
| <b>South Asia</b>                             |                            |                            |                            |                            |                                                |                                     |
| Bangladesh                                    | 0.3 (0.3 to 0.6)           | 0.4 (0.2 to 0.5)           | 0.3 (0.2 to 0.5)           | 0.2 (0.1 to 0.2)           | -4.9 (-5.8 to -3.9)                            | -51.7 (-57.9 to -44.6)              |
| Bhutan                                        | 0.6 (0.4 to 0.7)           | 0.3 (0.2 to 0.5)           | 0.3 (0.2 to 0.5)           | 0.2 (0.1 to 0.3)           | -4.1 (-4.9 to -3.1)                            | -45.7 (-52.1 to -37.3)              |
| India                                         | 0.6 (0.4 to 0.8)           | 0.4 (0.3 to 0.5)           | 0.4 (0.3 to 0.5)           | 0.2 (0.2 to 0.3)           | -4.4 (-5.2 to -3.6)                            | -48.4 (-54.3 to -41.8)              |
| Nepal                                         | 0.4 (0.3 to 0.6)           | 0.3 (0.2 to 0.5)           | 0.3 (0.2 to 0.5)           | 0.2 (0.1 to 0.3)           | -4.0 (-4.7 to -3.2)                            | -45.0 (-50.8 to -37.9)              |
| Pakistan                                      | 0.9 (0.7 to 1.1)           | 0.6 (0.4 to 0.7)           | 0.5 (0.4 to 0.7)           | 0.3 (0.2 to 0.4)           | -4.3 (-5.5 to -3.1)                            | -47.1 (-56.2 to -36.9)              |
| <b>Southeast Asia, East Asia, and Oceania</b> |                            |                            |                            |                            |                                                |                                     |
| <b>East Asia</b>                              |                            |                            |                            |                            |                                                |                                     |
| China                                         | 1.9 (1.6 to 2.4)           | 1.8 (1.0 to 2.0)           | 1.6 (0.9 to 1.9)           | 1.0 (0.5 to 1.2)           | -4.0 (-4.8 to -3.1)                            | -44.6 (-51.6 to -37.1)              |
| North Korea                                   | 1.8 (1.2 to 2.4)           | 2.0 (1.3 to 2.4)           | 1.9 (1.3 to 2.4)           | 1.4 (1.0 to 1.9)           | -2.0 (-2.7 to -1.3)                            | -26.0 (-33.2 to -17.5)              |
| Taiwan (Province of China)                    | 1.1 (1.1 to 1.2)           | 0.3 (0.3 to 0.3)           | 0.3 (0.3 to 0.3)           | 0.2 (0.1 to 0.2)           | -3.1 (-4.1 to -2.2)                            | -37.4 (-46.2 to -27.6)              |
| <b>Oceania</b>                                |                            |                            |                            |                            |                                                |                                     |
| American Samoa                                | 0.8 (0.7 to 1.1)           | 0.8 (0.6 to 1.0)           | 0.8 (0.6 to 1.0)           | 0.5 (0.4 to 0.6)           | -2.9 (-3.6 to -2.2)                            | -35.3 (-41.8 to -28.5)              |
| Federated States of Micronesia                | 1.2 (0.8 to 1.6)           | 1.1 (0.7 to 1.5)           | 1.0 (0.7 to 1.5)           | 0.8 (0.5 to 1.1)           | -2.5 (-3.0 to -1.6)                            | -30.8 (-39.1 to -21.3)              |
| Fiji                                          | 0.7 (0.5 to 0.8)           | 0.5 (0.4 to 0.6)           | 0.5 (0.4 to 0.6)           | 0.4 (0.3 to 0.5)           | -1.8 (-3.1 to -0.2)                            | -23.1 (-37.5 to -3.2)               |
| Guam                                          | 0.3 (0.3 to 0.4)           | 0.4 (0.3 to 0.5)           | 0.4 (0.3 to 0.5)           | 0.2 (0.1 to 0.3)           | -4.1 (-5.5 to -2.7)                            | -45.3 (-56.3 to -33.1)              |
| Kiribati                                      | 2.0 (1.3 to 2.4)           | 2.0 (1.0 to 2.5)           | 1.9 (1.0 to 2.6)           | 1.2 (0.6 to 1.7)           | -3.1 (-3.9 to -2.2)                            | -37.0 (-44.5 to -28.3)              |
| Marshall Islands                              | 1.5 (0.9 to 1.9)           | 1.3 (0.8 to 1.6)           | 1.3 (0.8 to 1.6)           | 0.8 (0.5 to 1.1)           | -3.1 (-3.9 to -2.3)                            | -36.9 (-44.2 to -28.7)              |
| Northern Mariana Islands                      | 0.3 (0.2 to 0.4)           | 0.3 (0.3 to 0.4)           | 0.3 (0.3 to 0.4)           | 0.2 (0.2 to 0.3)           | -2.5 (-3.4 to -1.6)                            | -30.8 (-40.2 to -21.5)              |
| Papua New Guinea                              | 1.8 (0.8 to 3.0)           | 1.7 (0.8 to 2.8)           | 1.7 (0.8 to 2.8)           | 1.1 (0.5 to 1.8)           | -3.0 (-3.7 to -2.3)                            | -36.8 (-43.0 to -28.9)              |
| Samoa                                         | 0.9 (0.6 to 1.3)           | 0.8 (0.5 to 1.1)           | 0.7 (0.5 to 1.1)           | 0.5 (0.3 to 0.8)           | -2.7 (-3.4 to -2.0)                            | -32.8 (-39.8 to -26.0)              |
| Solomon Islands                               | 1.4 (0.8 to 1.9)           | 1.3 (0.8 to 1.8)           | 1.2 (0.7 to 1.8)           | 0.8 (0.5 to 1.1)           | -3.2 (-3.9 to -2.5)                            | -37.9 (-44.1 to -31.2)              |
| Tonga                                         | 1.7 (1.4 to 2.0)           | 1.6 (1.2 to 1.9)           | 1.6 (1.2 to 1.9)           | 1.1 (0.8 to 1.3)           | -2.8 (-3.4 to -2.2)                            | -33.9 (-40.0 to -27.6)              |
| Vanuatu                                       | 1.4 (0.7 to 1.9)           | 1.3 (0.7 to 1.8)           | 1.3 (0.7 to 1.8)           | 0.8 (0.4 to 1.2)           | -2.9 (-3.6 to -2.2)                            | -34.8 (-41.4 to -28.0)              |
| <b>Southeast Asia</b>                         |                            |                            |                            |                            |                                                |                                     |
| Cambodia                                      | 0.8 (0.4 to 1.0)           | 0.7 (0.4 to 0.8)           | 0.6 (0.4 to 0.8)           | 0.4 (0.3 to 0.5)           | -3.3 (-4.0 to -2.6)                            | -38.7 (-44.9 to -31.9)              |
| Indonesia                                     | 0.4 (0.3 to 0.5)           | 0.4 (0.2 to 0.5)           | 0.4 (0.2 to 0.5)           | 0.3 (0.1 to 0.3)           | -3.1 (-3.9 to -2.5)                            | -37.6 (-44.0 to -31.0)              |
| Laos                                          | 1.1 (0.8 to 1.5)           | 0.7 (0.5 to 0.9)           | 0.7 (0.4 to 0.9)           | 0.4 (0.3 to 0.5)           | -3.7 (-4.5 to -2.9)                            | -42.3 (-48.7 to -35.3)              |
| Malaysia                                      | 1.1 (0.8 to 1.2)           | 0.8 (0.6 to 0.9)           | 0.8 (0.6 to 0.9)           | 0.5 (0.4 to 0.6)           | -3.2 (-4.4 to -2.1)                            | -38.3 (-48.5 to -27.3)              |
| Maldives                                      | 0.1 (0.1 to 0.2)           | 0.1 (0.1 to 0.1)           | 0.1 (0.1 to 0.1)           | 0.1 (0.0 to 0.1)           | -2.4 (-3.9 to -0.7)                            | -29.5 (-44.3 to -10.6)              |
| Mauritius                                     | 0.1 (0.1 to 0.1)           | 0.3 (0.3 to 0.3)           | 0.3 (0.2 to 0.3)           | 0.2 (0.2 to 0.2)           | -2.3 (-3.3 to -1.4)                            | -29.3 (-38.6 to -18.8)              |
| Myanmar                                       | 2.9 (1.6 to 3.8)           | 1.9 (1.0 to 2.5)           | 1.9 (0.9 to 2.4)           | 1.2 (0.6 to 1.6)           | -3.3 (-4.0 to -2.6)                            | -38.6 (-44.9 to -31.8)              |
| Philippines                                   | 0.4 (0.4 to 0.4)           | 0.3 (0.3 to 0.3)           | 0.3 (0.2 to 0.3)           | 0.2 (0.2 to 0.2)           | -2.7 (-3.6 to -1.9)                            | -33.1 (-41.4 to -24.3)              |
| Sri Lanka                                     | 0.7 (0.6 to 1.0)           | 0.4 (0.3 to 0.6)           | 0.3 (0.3 to 0.6)           | 0.2 (0.2 to 0.4)           | -2.6 (-3.9 to -1.2)                            | -32.3 (-44.6 to -16.5)              |
| Seychelles                                    | 0.8 (0.7 to 0.9)           | 0.6 (0.5 to 0.8)           | 0.6 (0.5 to 0.8)           | 0.4 (0.3 to 0.5)           | -2.8 (-3.7 to -1.8)                            | -34.0 (-42.2 to -24.0)              |
| Thailand                                      | 0.5 (0.3 to 0.6)           | 0.3 (0.2 to 0.3)           | 0.3 (0.2 to 0.3)           | 0.2 (0.1 to 0.2)           | -2.8 (-4.3 to -1.1)                            | -33.4 (-47.3 to -14.6)              |
| Timor-Leste                                   | 0.7 (0.4 to 0.9)           | 0.6 (0.3 to 0.7)           | 0.6 (0.3 to 0.8)           | 0.4 (0.2 to 0.5)           | -2.8 (-3.6 to -1.8)                            | -34.1 (-41.5 to -24.1)              |
| Vietnam                                       | 1.3 (0.6 to 1.8)           | 0.9 (0.4 to 1.3)           | 0.9 (0.4 to 1.3)           | 0.6 (0.3 to 0.9)           | -2.9 (-3.8 to -1.9)                            | -35.3 (-43.5 to -24.6)              |
| <b>Sub-Saharan Africa</b>                     |                            |                            |                            |                            |                                                |                                     |
| <b>Central Sub-Saharan Africa</b>             |                            |                            |                            |                            |                                                |                                     |
| Angola                                        | 2.3 (1.6 to 3.0)           | 1.4 (1.1 to 1.7)           | 1.3 (1.0 to 1.6)           | 0.7 (0.5 to 1.0)           | -4.2 (-5.2 to -3.2)                            | -46.4 (-53.9 to -37.9)              |
| Central African Republic                      | 2.2 (1.4 to 2.9)           | 2.0 (1.3 to 2.6)           | 2.0 (1.3 to 2.6)           | 1.4 (0.9 to 1.9)           | -2.6 (-3.7 to -1.5)                            | -31.9 (-42.5 to -19.6)              |
| Congo                                         | 1.7 (1.3 to 2.2)           | 1.2 (0.9 to 1.6)           | 1.2 (0.8 to 1.6)           | 0.8 (0.6 to 1.1)           | -2.7 (-3.8 to -1.4)                            | -32.7 (-43.7 to -18.3)              |
| Democratic Republic of the Congo              | 1.5 (1.2 to 2.4)           | 1.5 (1.1 to 2.5)           | 1.5 (1.0 to 2.4)           | 0.9 (0.6 to 1.5)           | -3.4 (-4.2 to -2.5)                            | -39.5 (-47.1 to -31.1)              |
| Equatorial Guinea                             | 1.5 (1.1 to 2.0)           | 0.8 (0.5 to 1.3)           | 0.8 (0.5 to 1.4)           | 0.5 (0.3 to 0.8)           | -3.4 (-4.6 to -2.1)                            | -39.6 (-49.8 to -27.2)              |
| Gabon                                         | 1.2 (0.9 to 1.5)           | 1.0 (0.8 to 1.5)           | 1.0 (0.7 to 1.5)           | 0.7 (0.5 to 1.1)           | -2.7 (-3.6 to -1.6)                            | -32.6 (-41.6 to -21.7)              |
| <b>Eastern Sub-Saharan Africa</b>             |                            |                            |                            |                            |                                                |                                     |
| Burundi                                       | 2.2 (1.5 to 2.9)           | 1.8 (1.4 to 2.3)           | 1.7 (1.3 to 2.2)           | 1.2 (0.9 to 1.6)           | -2.7 (-3.6 to -1.6)                            | -32.7 (-41.7 to -21.7)              |
| Comoros                                       | 1.8 (1.5 to 2.2)           | 1.5 (1.0 to 2.1)           | 1.5 (1.0 to 2.1)           | 1.0 (0.7 to 1.5)           | -2.5 (-3.2 to -1.8)                            | -31.1 (-37.7 to -23.9)              |
| Djibouti                                      | 1.9 (1.4 to 2.5)           | 1.4 (0.9 to 2.1)           | 1.3 (0.9 to 2.1)           | 0.8 (0.5 to 1.3)           | -3.6 (-4.5 to -2.7)                            | -41.8 (-48.7 to -33.4)              |
| Eritrea                                       | 2.5 (1.6 to 3.5)           | 2.0 (1.5 to 2.4)           | 1.9 (1.5 to 2.4)           | 1.2 (0.9 to 1.5)           | -3.4 (-4.2 to -2.6)                            | -39.6 (-46.9 to -31.8)              |
| Ethiopia                                      | 2.2 (1.7 to 2.7)           | 1.5 (1.1 to 1.8)           | 1.4 (1.1 to 1.8)           | 0.7 (0.5 to 0.9)           | -4.8 (-5.7 to -3.8)                            | -51.0 (-57.3 to -43.7)              |

|                                                                                                             | Estimate in 2000 (95% UIs) | Estimate in 2015 (95% UIs) | Estimate in 2017 (95% UIs) | Estimate in 2020 (95% UIs) | Annualised rate of change, 2015-2020 (95% UIs) | Percent change, 2015-2020 (95% UIs) |
|-------------------------------------------------------------------------------------------------------------|----------------------------|----------------------------|----------------------------|----------------------------|------------------------------------------------|-------------------------------------|
| Kenya                                                                                                       | 2.0 (1.6 to 2.8)           | 1.9 (1.3 to 2.6)           | 1.8 (1.3 to 2.6)           | 1.2 (0.8 to 1.9)           | -2.9 (-3.8 to -1.5)                            | -34.4 (-43.7 to -20.5)              |
| Madagascar                                                                                                  | 1.7 (1.4 to 2.1)           | 1.4 (1.1 to 1.8)           | 1.4 (1.1 to 1.8)           | 0.9 (0.7 to 1.2)           | -2.9 (-3.4 to -2.3)                            | -35.2 (-40.3 to -29.5)              |
| Malawi                                                                                                      | 1.9 (1.4 to 2.4)           | 1.4 (1.1 to 1.8)           | 1.4 (1.1 to 1.8)           | 0.9 (0.7 to 1.2)           | -3.0 (-4.1 to -1.8)                            | -35.6 (-46.2 to -23.3)              |
| Mozambique                                                                                                  | 2.4 (2.0 to 2.9)           | 2.0 (1.6 to 2.4)           | 1.9 (1.5 to 2.4)           | 1.1 (0.9 to 1.4)           | -3.9 (-4.8 to -3.0)                            | -44.4 (-51.4 to -36.5)              |
| Rwanda                                                                                                      | 2.3 (1.5 to 3.0)           | 1.4 (1.0 to 1.8)           | 1.3 (0.9 to 1.8)           | 0.8 (0.5 to 1.2)           | -3.7 (-5.2 to -2.0)                            | -42.1 (-54.5 to -25.4)              |
| Somalia                                                                                                     | 2.5 (1.6 to 3.4)           | 2.0 (1.4 to 2.8)           | 1.9 (1.3 to 2.7)           | 1.3 (0.9 to 1.9)           | -2.6 (-3.3 to -1.9)                            | -32.1 (-39.2 to -25.1)              |
| South Sudan                                                                                                 | 2.0 (1.3 to 3.0)           | 1.9 (1.3 to 2.6)           | 1.8 (1.3 to 2.6)           | 1.2 (0.8 to 1.7)           | -3.0 (-4.0 to -1.9)                            | -36.3 (-45.4 to -25.2)              |
| Tanzania                                                                                                    | 1.6 (1.3 to 1.8)           | 1.4 (1.1 to 1.9)           | 1.4 (1.1 to 1.8)           | 0.8 (0.6 to 1.1)           | -3.8 (-4.5 to -3.0)                            | -43.0 (-49.0 to -35.9)              |
| Uganda                                                                                                      | 1.6 (1.3 to 1.9)           | 1.3 (0.9 to 1.6)           | 1.2 (0.9 to 1.6)           | 0.7 (0.5 to 0.9)           | -3.9 (-4.7 to -3.0)                            | -43.9 (-50.9 to -35.8)              |
| Zambia                                                                                                      | 2.1 (1.6 to 2.6)           | 1.5 (1.2 to 1.8)           | 1.4 (1.1 to 1.8)           | 0.9 (0.6 to 1.2)           | -3.5 (-5.3 to -2.1)                            | -40.7 (-54.7 to -27.4)              |
| <b>Southern Sub-Saharan Africa</b>                                                                          |                            |                            |                            |                            |                                                |                                     |
| Botswana                                                                                                    | 1.3 (0.8 to 2.2)           | 1.1 (0.7 to 1.9)           | 1.0 (0.6 to 1.9)           | 0.8 (0.4 to 1.4)           | -2.4 (-4.2 to 0.1)                             | -29.4 (-46.5 to 1.6)                |
| Lesotho                                                                                                     | 2.2 (1.4 to 3.5)           | 2.2 (1.5 to 3.4)           | 2.0 (1.4 to 3.2)           | 1.4 (0.9 to 2.4)           | -3.1 (-5.0 to -1.0)                            | -36.1 (-52.5 to -13.3)              |
| Namibia                                                                                                     | 2.1 (1.6 to 3.0)           | 1.2 (0.8 to 1.9)           | 1.2 (0.8 to 1.9)           | 0.8 (0.5 to 1.2)           | -3.0 (-4.4 to -1.5)                            | -36.0 (-48.1 to -20.3)              |
| South Africa                                                                                                | 2.2 (1.5 to 2.4)           | 0.9 (0.7 to 1.2)           | 0.9 (0.7 to 1.2)           | 0.7 (0.4 to 1.1)           | -2.0 (-4.1 to 1.7)                             | -24.0 (-46.2 to 28.3)               |
| Swaziland                                                                                                   | 2.3 (1.6 to 3.4)           | 1.9 (1.4 to 2.8)           | 1.8 (1.3 to 2.6)           | 1.3 (0.8 to 2.1)           | -2.7 (-4.8 to -0.2)                            | -32.1 (-51.2 to -3.0)               |
| Zimbabwe                                                                                                    | 3.8 (3.0 to 4.8)           | 3.6 (2.8 to 4.3)           | 3.5 (2.6 to 4.2)           | 3.6 (2.6 to 4.2)           | -0.2 (-2.6 to 2.7)                             | -0.6 (-32.5 to 50.4)                |
| <b>Western Sub-Saharan Africa</b>                                                                           |                            |                            |                            |                            |                                                |                                     |
| Benin                                                                                                       | 1.6 (1.2 to 2.0)           | 1.3 (1.0 to 1.6)           | 1.2 (0.9 to 1.5)           | 0.7 (0.5 to 0.9)           | -4.0 (-4.8 to -3.2)                            | -44.8 (-51.3 to -37.7)              |
| Burkina Faso                                                                                                | 2.0 (1.6 to 2.4)           | 1.7 (1.3 to 2.2)           | 1.7 (1.3 to 2.3)           | 1.0 (0.8 to 1.4)           | -3.5 (-4.3 to -2.6)                            | -40.5 (-47.8 to -32.1)              |
| Cameroon                                                                                                    | 1.6 (1.2 to 2.0)           | 1.2 (0.9 to 1.5)           | 1.1 (0.9 to 1.4)           | 0.7 (0.5 to 0.9)           | -3.7 (-4.6 to -2.7)                            | -42.7 (-49.8 to -33.4)              |
| Cote d'Ivoire                                                                                               | 0.9 (0.7 to 1.0)           | 0.7 (0.6 to 0.8)           | 0.7 (0.6 to 0.8)           | 0.4 (0.3 to 0.5)           | -3.2 (-4.1 to -2.3)                            | -37.8 (-45.9 to -29.7)              |
| Chad                                                                                                        | 1.8 (1.2 to 2.4)           | 1.5 (1.1 to 2.0)           | 1.5 (1.1 to 1.9)           | 0.9 (0.6 to 1.2)           | -3.7 (-4.5 to -2.8)                            | -42.1 (-49.0 to -34.8)              |
| Cote d'Ivoire                                                                                               | 1.6 (1.1 to 2.1)           | 1.4 (1.1 to 1.7)           | 1.3 (1.0 to 1.6)           | 0.8 (0.6 to 0.9)           | -4.0 (-4.8 to -3.1)                            | -45.0 (-51.6 to -37.5)              |
| The Gambia                                                                                                  | 1.5 (1.1 to 1.8)           | 1.4 (1.0 to 1.6)           | 1.3 (0.9 to 1.6)           | 0.8 (0.6 to 1.1)           | -3.3 (-4.0 to -2.6)                            | -38.8 (-44.8 to -32.3)              |
| Ghana                                                                                                       | 1.4 (1.1 to 1.7)           | 1.3 (0.9 to 1.7)           | 1.3 (0.9 to 1.7)           | 0.8 (0.5 to 1.1)           | -3.1 (-3.9 to -2.2)                            | -37.3 (-44.5 to -28.6)              |
| Guinea                                                                                                      | 1.8 (1.2 to 2.3)           | 1.6 (1.1 to 1.9)           | 1.5 (1.1 to 1.9)           | 0.9 (0.6 to 1.1)           | -3.9 (-4.9 to -3.0)                            | -44.4 (-52.1 to -36.0)              |
| Guinea-Bissau                                                                                               | 2.0 (1.3 to 2.8)           | 1.5 (1.1 to 1.9)           | 1.5 (1.1 to 1.8)           | 0.8 (0.6 to 1.1)           | -4.0 (-4.7 to -3.3)                            | -45.0 (-50.6 to -38.7)              |
| Liberia                                                                                                     | 1.6 (1.1 to 2.3)           | 1.2 (0.8 to 1.8)           | 1.1 (0.8 to 1.8)           | 0.8 (0.5 to 1.2)           | -3.0 (-3.9 to -2.1)                            | -35.6 (-44.3 to -26.6)              |
| Mali                                                                                                        | 1.8 (1.1 to 2.4)           | 1.4 (1.0 to 1.9)           | 1.4 (1.0 to 1.9)           | 0.9 (0.6 to 1.2)           | -3.1 (-4.0 to -2.2)                            | -37.4 (-45.2 to -28.4)              |
| Mauritania                                                                                                  | 1.3 (1.0 to 1.6)           | 1.0 (0.7 to 1.4)           | 0.9 (0.7 to 1.4)           | 0.6 (0.4 to 0.8)           | -3.6 (-4.4 to -2.7)                            | -41.4 (-48.2 to -33.0)              |
| Niger                                                                                                       | 1.9 (1.2 to 2.6)           | 1.4 (1.0 to 2.0)           | 1.4 (1.0 to 2.0)           | 0.9 (0.6 to 1.3)           | -3.1 (-3.9 to -2.4)                            | -37.2 (-44.1 to -30.1)              |
| Nigeria                                                                                                     | 1.2 (0.8 to 1.6)           | 0.9 (0.6 to 1.2)           | 0.9 (0.6 to 1.2)           | -3.3 (-4.4 to -2.3)        | -38.5 (-48.6 to -29.0)                         |                                     |
| Sao Tome and Principe                                                                                       | 1.2 (0.9 to 1.6)           | 1.1 (0.7 to 1.6)           | 1.0 (0.7 to 1.5)           | 0.6 (0.4 to 0.9)           | -3.8 (-4.9 to -2.7)                            | -43.6 (-51.7 to -32.9)              |
| Senegal                                                                                                     | 1.6 (1.2 to 1.9)           | 1.3 (1.0 to 1.7)           | 1.3 (1.0 to 1.7)           | 0.8 (0.6 to 1.0)           | -3.6 (-4.3 to -2.9)                            | -41.8 (-47.4 to -35.2)              |
| Sierra Leone                                                                                                | 1.7 (1.1 to 2.3)           | 1.4 (1.0 to 1.8)           | 1.3 (1.0 to 1.7)           | 0.8 (0.6 to 1.1)           | -3.6 (-4.5 to -2.7)                            | -41.8 (-49.2 to -33.5)              |
| Togo                                                                                                        | 1.5 (1.2 to 1.9)           | 1.2 (0.9 to 1.5)           | 1.1 (0.8 to 1.5)           | 0.7 (0.5 to 0.9)           | -3.6 (-4.5 to -2.7)                            | -41.8 (-48.9 to -33.7)              |
| <b>Indicator 3.a.1: Age-standardised prevalence of current smoking in populations aged 10 and older (%)</b> |                            |                            |                            |                            |                                                |                                     |
| Central Europe, Eastern Europe, and Central Asia                                                            |                            |                            |                            |                            |                                                |                                     |
| Central Asia                                                                                                |                            |                            |                            |                            |                                                |                                     |
| Armenia                                                                                                     | 53.6 (51.5 to 55.6)        | 49.3 (47.2 to 51.4)        | 48.5 (46.2 to 50.9)        | 45.7 (41.9 to 49.9)        | -0.5 (-0.9 to -0.1)                            | -7.4 (-12.3 to -2.2)                |
| Azerbaijan                                                                                                  | 43.2 (40.7 to 45.3)        | 46.4 (44.3 to 48.4)        | 42.7 (43.4 to 47.9)        | 47.2 (43.4 to 51.4)        | 0.1 (0.2 to 0.5)                               | 1.8 (-2.4 to 7.5)                   |
| Georgia                                                                                                     | 52.9 (50.4 to 55.7)        | 50.8 (48.0 to 53.4)        | 49.9 (46.9 to 52.8)        | 50.2 (44.7 to 56.0)        | -0.1 (-0.5 to 0.4)                             | -1.0 (-7.6 to 5.5)                  |
| Kazakhstan                                                                                                  | 50.6 (48.4 to 53.1)        | 48.8 (46.7 to 51.1)        | 47.6 (45.2 to 50.1)        | 45.8 (41.6 to 50.3)        | -0.4 (-0.8 to -0.0)                            | -6.2 (-11.5 to -0.4)                |
| Kyrgyzstan                                                                                                  | 41.0 (39.4 to 42.6)        | 40.8 (38.9 to 42.9)        | 40.0 (37.8 to 42.1)        | 40.1 (36.2 to 44.4)        | -0.1 (-0.5 to 0.3)                             | -1.9 (-7.7 to 4.7)                  |
| Mongolia                                                                                                    | 49.0 (46.7 to 51.1)        | 52.3 (49.9 to 54.8)        | 51.6 (48.9 to 54.4)        | 54.2 (49.1 to 59.6)        | 0.2 (-0.2 to 0.6)                              | 3.6 (-2.4 to 10.1)                  |
| Tajikistan                                                                                                  | 23.5 (21.6 to 25.5)        | 19.6 (17.9 to 21.4)        | 19.4 (17.7 to 21.3)        | 17.0 (14.6 to 19.9)        | -1.0 (-1.5 to -0.3)                            | -13.4 (-20.2 to -4.8)               |
| Turkmenistan                                                                                                | 39.0 (36.0 to 41.9)        | 38.9 (36.2 to 41.6)        | 38.6 (35.8 to 41.4)        | 39.0 (34.7 to 43.4)        | 0.0 (-0.4 to 0.5)                              | 0.1 (-6.1 to 7.2)                   |
| Uzbekistan                                                                                                  | 24.1 (22.4 to 25.9)        | 23.3 (21.5 to 25.0)        | 22.7 (21.0 to 24.7)        | 22.6 (19.6 to 25.9)        | -0.2 (-0.8 to 0.3)                             | -3.1 (-10.9 to 5.3)                 |
| Central Europe                                                                                              |                            |                            |                            |                            |                                                |                                     |
| Albania                                                                                                     | 48.4 (45.9 to 50.9)        | 56.8 (53.6 to 59.8)        | 56.6 (53.2 to 60.0)        | 66.3 (58.8 to 74.7)        | 1.0 (0.5 to 1.6)                               | 16.7 (7.9 to 26.8)                  |
| Bosnia and Herzegovina                                                                                      | 60.5 (58.6 to 62.3)        | 67.3 (64.2 to 70.3)        | 65.7 (62.0 to 69.3)        | 69.8 (62.4 to 77.6)        | 0.2 (0.2 to 0.7)                               | 3.8 (-3.6 to 11.0)                  |
| Bulgaria                                                                                                    | 77.9 (73.4 to 82.2)        | 70.0 (67.2 to 72.8)        | 69.2 (66.0 to 72.4)        | 65.9 (59.8 to 72.8)        | -0.4 (-0.8 to 0.1)                             | -5.8 (-11.6 to 1.2)                 |
| Croatia                                                                                                     | 66.9 (63.4 to 70.8)        | 69.4 (66.5 to 72.4)        | 68.5 (65.3 to 72.0)        | 69.6 (63.2 to 76.0)        | 0.0 (-0.4 to 0.4)                              | 0.3 (-6.1 to 6.6)                   |
| Czech Republic                                                                                              | 63.6 (61.1 to 65.9)        | 58.7 (56.0 to 61.4)        | 57.8 (54.7 to 61.0)        | 55.5 (50.1 to 61.4)        | -0.4 (-0.8 to 0.1)                             | -5.4 (-11.4 to 0.8)                 |
| Hungary                                                                                                     | 69.7 (66.4 to 72.9)        | 60.3 (57.0 to 63.6)        | 58.5 (54.9 to 62.4)        | 53.6 (47.8 to 60.3)        | -0.8 (-1.3 to -0.3)                            | -11.0 (-17.4 to -4.1)               |
| Macedonia                                                                                                   | 66.2 (61.4 to 71.4)        | 67.7 (63.7 to 71.4)        | 67.2 (62.9 to 71.4)        | 70.6 (61.5 to 80.4)        | 0.3 (-0.4 to 0.9)                              | 4.3 (-5.3 to 14.3)                  |
| Montenegro                                                                                                  | 68.9 (64.1 to 73.8)        | 70.5 (67.7 to 73.2)        | 69.7 (66.4 to 73.1)        | 72.9 (65.5 to 81.2)        | 0.2 (-0.3 to 0.7)                              | 3.4 (-4.2 to 11.8)                  |
| Poland                                                                                                      | 62.1 (58.6 to 65.7)        | 55.3 (52.8 to 57.9)        | 55.9 (52.8 to 58.8)        | 54.3 (49.2 to 59.8)        | -0.1 (-0.6 to 0.4)                             | -1.8 (-8.5 to 5.4)                  |
| Romania                                                                                                     | 62.3 (58.7 to 65.8)        | 53.7 (51.1 to 56.8)        | 53.4 (50.3 to 56.7)        | 50.9 (45.4 to 57.6)        | -0.4 (-0.9 to 0.2)                             | -5.4 (-12.4 to 2.4)                 |
| Serbia                                                                                                      | 64.3 (61.8 to 66.9)        | 62.6 (59.0 to 66.1)        | 61.6 (57.7 to 65.7)        | 62.9 (55.5 to 70.9)        | 0.0 (-0.5 to 0.5)                              | 0.4 (-7.1 to 8.4)                   |
| Slovakia                                                                                                    | 60.7 (57.2 to 64.3)        | 49.8 (47.0 to 52.8)        | 49.4 (46.1 to 52.9)        | 44.5 (38.9 to 50.3)        | -0.8 (-1.3 to -0.3)                            | -10.8 (-17.9 to -3.8)               |
| Slovenia                                                                                                    | 50.7 (47.2 to 54.3)        | 52.8 (49.8 to 55.9)        | 52.6 (49.1 to 56.1)        | 54.5 (48.1 to 61.5)        | 0.2 (-0.3 to 0.8)                              | 3.2 (-5.1 to 12.2)                  |
| Eastern Europe                                                                                              |                            |                            |                            |                            |                                                |                                     |
| Belarus                                                                                                     | 67.6 (64.8 to 70.5)        | 67.9 (65.1 to 70.8)        | 67.5 (64.1 to 71.2)        | 72.3 (64.7 to 80.3)        | 0.4 (-0.1 to 0.9)                              | 6.4 (-1.4 to 14.9)                  |
| Estonia                                                                                                     | 56.1 (54.4 to 57.9)        | 49.2 (46.8 to 52.0)        | 47.4 (44.4 to 50.5)        | 41.7 (37.3 to 46.0)        | -1.1 (-1.6 to -0.6)                            | -15.4 (-21.2 to -9.2)               |
| Latvia                                                                                                      | 62.5 (60.4 to 64.5)        | 63.8 (61.2 to 66.5)        | 62.7 (59.6 to 65.9)        | 63.7 (58.6 to 70.3)        | -0.0 (-0.4 to 0.4)                             | -0.2 (-6.3 to 6.6)                  |
| Lithuania                                                                                                   | 55.0 (53.1 to 57.0)        | 56.9 (54.2 to 59.6)        | 56.2 (52.1 to 60.1)        | 58.2 (52.1 to 65.1)        | 0.1 (-0.3 to 0.7)                              | 2.2 (-5.0 to 10.2)                  |
| Moldova                                                                                                     | 42.8 (40.2 to 45.6)        | 41.8 (39.6 to 43.9)        | 40.8 (38.2 to 43.1)        | 40.9 (36.4 to 45.7)        | -0.2 (-0.7 to 0.3)                             | -2.2 (-9.3 to 5.2)                  |
| Russia                                                                                                      | 67.0 (65.8 to 68.2)        | 56.9 (55.5 to 58.3)        | 56.1 (53.9 to 58.4)        | 51.7 (47.9 to 58.4)        | -0.6 (-1.1 to -0.2)                            | -9.1 (-14.6 to -3.1)                |
| Ukraine                                                                                                     | 65.9 (63.9 to 68.0)        | 58.7 (55.8 to 61.5)        | 56.6 (53.2 to 60.0)        | 51.4 (45.7 to 57.5)        | -0.9 (-1.4 to -0.4)                            | -12.5 (-18.7 to -5.4)               |
| High-income                                                                                                 |                            |                            |                            |                            |                                                |                                     |
| Australia                                                                                                   |                            |                            |                            |                            |                                                |                                     |
| Australia                                                                                                   | 43.1 (41.7 to 44.3)        | 29.0 (27.0 to 31.1)        | 28.4 (25.7 to 31.2)        | 22.1 (18.7 to 26.0)        | -1.8 (-2.5 to -1.1)                            | -23.7 (-31.6 to -14.6)              |
| New Zealand                                                                                                 | 51.7 (49.9 to 53.7)        | 35.6 (34.2 to 37.0)        | 35.3 (33.5 to 37.2)        | 29.0 (26.4 to 32.0)        | -1.4 (-1.9 to -0.8)                            | -18.4 (-24.4 to -11.9)              |
| High-income Asia Pacific                                                                                    |                            |                            |                            |                            |                                                |                                     |
| Brunei                                                                                                      | 35.4 (32.9 to 38.0)        | 33.3 (30.4 to 36.0)        | 33.0 (30.2 to 35.8)        | 31.9 (27.6 to 36.3)        | -0.3 (-0.8 to 0.2)                             | -4.4 (-11.3 to 3.1)                 |
| Japan                                                                                                       | 58.9 (57.2 to 60.6)        | 42.8 (40.2 to 45.7)        | 43.2 (39.9 to 46.7)        | 37.2 (32.5 to 42.7)        | -1.0 (-1.5 to -0.4)                            | -13.2 (-20.2 to -5.3)               |
| South Korea                                                                                                 | 53.9 (51.4 to 56.5)        | 43.3 (41.1 to 45.6)        | 42.8 (40.3 to 45.3)        | 38.1 (34.0 to 42.4)        | -0.9 (-1.3 to -0.4)                            | -12.0 (-17.8 to -5.9)               |
| Singapore                                                                                                   | 30.2 (27.8 to 32.7)        | 28.1 (25.8 to 30.7)        | 27.4 (24.8 to 30.2)        | 26.5 (22.1 to 31.7)        | -0.4 (-1.1 to 0.4)                             | -5.6 (-15.0 to 5.5)                 |

|                                     | Estimate in 2000 (95% UIs) | Estimate in 2015 (95% UIs) | Estimate in 2017 (95% UIs) | Estimate in 2030 (95% UIs) | Annualised rate of change, 2015-2030 (95% UIs) | Percent change, 2015-2030 (95% UIs) |
|-------------------------------------|----------------------------|----------------------------|----------------------------|----------------------------|------------------------------------------------|-------------------------------------|
| <b>High-income North America</b>    |                            |                            |                            |                            |                                                |                                     |
| Canada                              | 47.1 (44.8 to 49.7)        | 32.4 (28.7 to 36.1)        | 32.5 (28.7 to 36.5)        | 27.2 (22.1 to 32.9)        | -0.8 (-1.9 to -0.4)                            | -16.1 (-25.3 to -5.4)               |
| Greenland                           | 96.0 (90.7 to 101.0)       | 91.5 (85.7 to 97.5)        | 90.2 (84.0 to 96.7)        | 88.4 (78.8 to 98.9)        | -0.2 (-0.7 to 0.2)                             | -3.4 (-9.4 to 2.9)                  |
| United States                       | 50.2 (48.7 to 51.8)        | 38.1 (35.2 to 40.5)        | 38.3 (35.2 to 41.4)        | 38.1 (29.7 to 38.9)        | -0.8 (-1.4 to -0.2)                            | -17.7 (-18.5 to -2.8)               |
| <b>Southern Latin America</b>       |                            |                            |                            |                            |                                                |                                     |
| Argentina                           | 57.9 (54.1 to 61.5)        | 45.6 (43.2 to 47.9)        | 45.0 (42.2 to 47.8)        | 40.7 (35.9 to 45.6)        | -0.8 (-1.3 to -0.2)                            | -10.8 (-17.9 to -3.2)               |
| Chile                               | 73.3 (69.6 to 77.1)        | 63.4 (59.4 to 67.3)        | 62.9 (58.5 to 67.5)        | 59.2 (51.5 to 67.4)        | -0.5 (-1.0 to 0.1)                             | -6.6 (-14.1 to 0.8)                 |
| Uruguay                             | 66.5 (63.3 to 69.5)        | 45.9 (42.5 to 49.3)        | 45.3 (41.5 to 49.2)        | 37.8 (31.9 to 44.1)        | -1.3 (-2.0 to -0.7)                            | -17.7 (-25.6 to -9.6)               |
| <b>Western Europe</b>               |                            |                            |                            |                            |                                                |                                     |
| Andorra                             | 58.0 (53.8 to 62.3)        | 51.0 (45.9 to 56.2)        | 50.5 (45.4 to 55.7)        | 47.5 (40.5 to 55.2)        | -0.5 (-1.0 to 0.1)                             | -6.9 (-14.0 to 1.2)                 |
| Austria                             | 68.3 (65.6 to 70.9)        | 59.0 (55.8 to 62.3)        | 57.5 (53.9 to 61.2)        | 53.3 (47.7 to 59.5)        | -0.7 (-1.1 to -0.2)                            | -9.7 (-15.5 to -3.0)                |
| Belgium                             | 59.9 (57.7 to 62.3)        | 42.8 (40.4 to 45.3)        | 41.7 (38.7 to 44.7)        | 34.7 (30.6 to 39.4)        | -1.4 (-2.0 to -0.8)                            | -19.0 (-26.1 to -11.8)              |
| Cyprus                              | 67.2 (63.6 to 71.1)        | 60.2 (56.6 to 63.6)        | 58.9 (55.3 to 62.6)        | 55.8 (49.5 to 62.5)        | -0.5 (-1.0 to -0.0)                            | -7.5 (-13.9 to -0.4)                |
| Denmark                             | 65.3 (63.5 to 67.2)        | 40.2 (37.8 to 42.7)        | 39.6 (36.7 to 42.7)        | 30.7 (26.9 to 35.0)        | -1.8 (-2.4 to -1.2)                            | -23.7 (-30.6 to -16.0)              |
| Finland                             | 48.1 (46.7 to 49.5)        | 39.6 (37.1 to 42.2)        | 39.3 (36.5 to 42.5)        | 35.6 (31.5 to 40.5)        | -0.7 (-1.3 to -0.1)                            | -10.0 (-17.2 to -1.4)               |
| France                              | 65.3 (63.1 to 67.4)        | 61.6 (58.4 to 64.8)        | 63.7 (59.8 to 67.4)        | 66.8 (60.0 to 73.3)        | 0.5 (0.1 to 1.0)                               | 8.6 (1.0 to 15.6)                   |
| Germany                             | 61.0 (59.6 to 62.4)        | 52.7 (50.0 to 55.4)        | 51.3 (49.5 to 55.9)        | 51.3 (45.8 to 57.1)        | -0.2 (-0.7 to 0.3)                             | -2.7 (-9.7 to 4.5)                  |
| Greece                              | 74.4 (71.9 to 76.8)        | 71.1 (68.2 to 73.8)        | 69.0 (65.5 to 72.5)        | 68.2 (62.3 to 74.6)        | -0.3 (-0.7 to 0.1)                             | -4.0 (-10.1 to 2.0)                 |
| Iceland                             | 46.2 (43.5 to 49.5)        | 30.7 (27.6 to 34.2)        | 31.1 (27.6 to 35.0)        | 25.9 (21.1 to 31.6)        | -1.2 (-1.9 to -0.3)                            | -15.7 (-25.2 to -4.4)               |
| Ireland                             | 57.6 (55.8 to 59.4)        | 42.1 (39.5 to 44.9)        | 40.1 (37.2 to 43.2)        | 33.4 (28.8 to 38.1)        | -1.6 (-2.2 to -0.9)                            | -20.9 (-28.2 to -13.1)              |
| Israel                              | 49.4 (46.6 to 52.2)        | 41.4 (38.1 to 44.8)        | 41.3 (37.7 to 45.0)        | 38.4 (32.5 to 45.0)        | -0.5 (-1.1 to 0.2)                             | -7.4 (-15.7 to 2.5)                 |
| Italy                               | 49.7 (48.7 to 50.8)        | 46.5 (43.9 to 49.3)        | 46.0 (42.9 to 49.5)        | 44.1 (38.9 to 49.7)        | -0.4 (-0.9 to 0.2)                             | -5.4 (-13.3 to 2.7)                 |
| Luxembourg                          | 58.2 (55.4 to 61.5)        | 45.4 (41.8 to 49.0)        | 44.4 (40.6 to 48.1)        | 38.7 (33.1 to 44.8)        | -1.1 (-1.7 to -0.5)                            | -14.9 (-23.2 to -6.7)               |
| Malta                               | 47.9 (45.1 to 50.9)        | 45.7 (42.1 to 49.3)        | 45.4 (41.7 to 49.3)        | 44.6 (38.1 to 52.3)        | -0.2 (-0.8 to 0.5)                             | -2.4 (-11.1 to 7.7)                 |
| Netherlands                         | 59.9 (59.1 to 60.6)        | 40.2 (37.8 to 42.6)        | 39.4 (36.5 to 42.4)        | 31.0 (27.1 to 35.7)        | -1.7 (-2.3 to -1.1)                            | -22.9 (-29.5 to -15.2)              |
| Norway                              | 63.6 (61.2 to 66.2)        | 32.8 (29.9 to 35.9)        | 32.9 (29.7 to 36.4)        | 25.0 (20.9 to 29.7)        | -1.8 (-2.6 to -1.0)                            | -23.8 (-31.8 to -14.2)              |
| Portugal                            | 51.9 (49.7 to 54.3)        | 48.5 (45.8 to 51.3)        | 49.0 (46.1 to 52.3)        | 51.7 (45.8 to 57.9)        | 0.4 (-0.2 to 1.0)                              | 6.5 (-2.6 to 15.7)                  |
| Spain                               | 63.5 (61.6 to 65.3)        | 57.8 (54.9 to 61.0)        | 55.7 (52.3 to 59.3)        | 49.8 (44.6 to 55.6)        | -1.0 (-1.5 to -0.5)                            | -13.9 (-20.1 to -7.2)               |
| Sweden                              | 38.5 (36.8 to 40.2)        | 23.0 (21.1 to 25.1)        | 22.4 (20.0 to 24.9)        | 17.3 (14.4 to 20.9)        | -1.9 (-2.7 to -1.0)                            | -24.7 (-33.3 to -14.2)              |
| Switzerland                         | 57.6 (55.4 to 60.0)        | 48.9 (44.9 to 53.2)        | 48.4 (44.4 to 53.2)        | 45.5 (39.0 to 52.0)        | -0.5 (-1.1 to 0.2)                             | -6.9 (-15.1 to 2.5)                 |
| United Kingdom                      | 53.9 (52.8 to 55.0)        | 45.6 (42.7 to 48.5)        | 43.6 (40.1 to 47.0)        | 39.1 (34.0 to 44.7)        | -1.0 (-1.6 to -0.4)                            | -14.3 (-21.8 to -6.4)               |
| <b>Latin America and Caribbean</b>  |                            |                            |                            |                            |                                                |                                     |
| <b>Andean Latin America</b>         |                            |                            |                            |                            |                                                |                                     |
| Bolivia                             | 18.0 (16.3 to 19.8)        | 17.6 (15.9 to 19.6)        | 17.1 (15.3 to 19.1)        | 17.5 (14.0 to 21.8)        | -0.1 (-1.0 to 0.9)                             | -1.2 (-13.5 to 14.2)                |
| Ecuador                             | 25.7 (23.9 to 27.4)        | 25.3 (23.4 to 27.1)        | 24.4 (22.3 to 26.4)        | 24.6 (21.0 to 28.3)        | -0.2 (-0.8 to 0.4)                             | -2.8 (-11.3 to 6.1)                 |
| Peru                                | 20.4 (18.6 to 22.4)        | 15.9 (14.5 to 17.6)        | 15.5 (14.0 to 17.2)        | 14.0 (11.9 to 16.6)        | -0.9 (-1.6 to -0.2)                            | -12.3 (-20.9 to -2.7)               |
| <b>Caribbean</b>                    |                            |                            |                            |                            |                                                |                                     |
| Antigua and Barbuda                 | 22.1 (19.6 to 24.6)        | 20.6 (18.3 to 23.1)        | 20.3 (18.1 to 22.9)        | 20.1 (16.9 to 23.9)        | -0.2 (-0.8 to 0.5)                             | -2.4 (-11.7 to 8.0)                 |
| The Bahamas                         | 21.9 (19.5 to 24.3)        | 20.8 (18.6 to 23.4)        | 20.6 (18.4 to 23.1)        | 21.0 (17.5 to 25.2)        | 0.1 (-0.7 to 0.8)                              | 0.9 (-9.3 to 12.2)                  |
| Barbados                            | 23.6 (21.2 to 26.1)        | 22.2 (20.1 to 24.4)        | 22.0 (19.8 to 24.2)        | 22.1 (18.4 to 26.0)        | -0.1 (-0.7 to 0.7)                             | -0.7 (-10.4 to 10.5)                |
| Belize                              | 25.3 (23.3 to 27.2)        | 21.8 (20.0 to 23.6)        | 21.4 (19.5 to 23.4)        | 19.6 (16.9 to 22.7)        | -0.7 (-1.3 to -0.1)                            | -10.3 (-17.7 to -2.2)               |
| Bermuda                             | 27.0 (24.2 to 30.1)        | 25.8 (23.3 to 28.7)        | 25.4 (23.0 to 28.4)        | 25.7 (21.9 to 30.4)        | -0.0 (-0.6 to 0.6)                             | -0.3 (-9.2 to 9.7)                  |
| Cuba                                | 60.8 (56.5 to 65.2)        | 54.5 (50.2 to 58.9)        | 53.5 (49.0 to 57.9)        | 50.7 (43.6 to 58.1)        | -0.5 (-1.1 to 0.1)                             | -7.2 (-14.7 to 0.8)                 |
| Dominica                            | 23.2 (21.0 to 25.5)        | 21.0 (18.7 to 23.2)        | 20.4 (18.1 to 22.7)        | 19.5 (16.0 to 23.5)        | -0.5 (-1.2 to 0.4)                             | -7.3 (-16.8 to 5.5)                 |
| Dominican Republic                  | 26.8 (25.2 to 28.5)        | 20.3 (18.6 to 22.0)        | 19.8 (18.2 to 21.7)        | 17.5 (15.0 to 20.9)        | -1.0 (-1.6 to -0.4)                            | -13.8 (-21.0 to -5.2)               |
| Grenada                             | 27.6 (25.2 to 30.3)        | 25.2 (23.0 to 27.7)        | 24.8 (22.6 to 27.2)        | 23.8 (20.5 to 27.9)        | -0.4 (-1.0 to 0.2)                             | -5.7 (-13.9 to 3.1)                 |
| Guyana                              | 30.1 (27.6 to 32.8)        | 29.4 (27.1 to 32.1)        | 28.9 (26.4 to 31.6)        | 29.4 (25.4 to 34.4)        | -0.0 (-0.7 to 0.6)                             | -0.3 (-9.4 to 10.0)                 |
| Haiti                               | 19.0 (17.3 to 20.9)        | 14.6 (13.1 to 16.1)        | 14.2 (12.7 to 15.7)        | 12.1 (10.2 to 15.7)        | -1.3 (-2.0 to -0.5)                            | -17.4 (-25.4 to -7.5)               |
| Jamaica                             | 37.0 (34.6 to 39.7)        | 33.9 (31.2 to 36.8)        | 33.1 (30.3 to 36.0)        | 32.5 (27.7 to 37.8)        | -0.3 (-0.9 to 0.4)                             | -4.2 (-12.6 to 5.6)                 |
| Puerto Rico                         | 30.0 (28.3 to 31.9)        | 24.1 (22.3 to 25.9)        | 23.7 (21.7 to 25.9)        | 21.5 (18.3 to 24.9)        | -0.8 (-1.5 to -0.1)                            | -10.9 (-20.0 to -1.0)               |
| Saint Lucia                         | 32.0 (28.8 to 35.4)        | 30.1 (27.2 to 33.4)        | 29.6 (26.6 to 32.8)        | 29.9 (25.1 to 35.6)        | -0.1 (-0.7 to 0.7)                             | -1.1 (-10.6 to 11.4)                |
| Saint Vincent and the Grenadines    | 29.8 (27.2 to 32.5)        | 26.3 (23.9 to 29.0)        | 25.9 (23.5 to 28.5)        | 24.5 (20.8 to 28.8)        | -0.5 (-1.0 to 0.2)                             | -7.0 (-14.5 to 2.6)                 |
| Suriname                            | 44.1 (40.5 to 48.0)        | 42.7 (39.3 to 46.4)        | 41.6 (38.2 to 45.2)        | 41.2 (35.9 to 46.9)        | -0.3 (-0.7 to 0.3)                             | -3.6 (-10.6 to 4.1)                 |
| Trinidad and Tobago                 | 34.4 (32.1 to 36.9)        | 34.3 (31.9 to 36.7)        | 34.0 (31.5 to 36.8)        | 34.9 (30.0 to 40.6)        | 0.1 (-0.5 to 0.7)                              | 1.6 (-7.2 to 11.6)                  |
| Virgin Islands, U.S.                | 18.2 (16.6 to 19.8)        | 13.6 (11.6 to 15.2)        | 13.0 (11.6 to 15.0)        | 12.0 (9.5 to 15.2)         | -0.8 (-1.7 to 0.2)                             | -11.4 (-22.0 to 2.5)                |
| <b>Central Latin America</b>        |                            |                            |                            |                            |                                                |                                     |
| Colombia                            | 39.1 (36.5 to 41.8)        | 26.2 (24.2 to 28.1)        | 25.7 (23.6 to 27.9)        | 21.9 (18.7 to 25.8)        | -1.2 (-1.9 to -0.4)                            | -16.4 (-24.6 to -5.9)               |
| Costa Rica                          | 36.2 (34.4 to 38.1)        | 26.2 (24.4 to 28.0)        | 25.9 (23.8 to 28.0)        | 21.7 (18.5 to 25.3)        | -1.3 (-1.9 to -0.6)                            | -17.2 (-24.4 to -9.2)               |
| El Salvador                         | 19.0 (17.1 to 21.1)        | 16.4 (14.7 to 18.3)        | 16.0 (14.2 to 17.9)        | 14.8 (12.1 to 17.7)        | -0.7 (-1.5 to 0.0)                             | -10.2 (-19.9 to 0.7)                |
| Guatemala                           | 28.8 (26.5 to 31.2)        | 21.0 (19.2 to 22.9)        | 20.5 (18.6 to 22.5)        | 16.8 (14.3 to 19.9)        | -1.5 (-2.1 to -0.8)                            | -20.1 (-26.6 to -11.5)              |
| Honduras                            | 31.4 (29.1 to 33.8)        | 26.3 (24.0 to 28.5)        | 25.7 (23.4 to 28.0)        | 23.4 (19.9 to 26.9)        | -0.8 (-1.4 to -0.2)                            | -11.2 (-19.0 to -3.3)               |
| Mexico                              | 45.7 (43.9 to 47.6)        | 32.8 (31.0 to 34.6)        | 32.4 (30.4 to 34.4)        | 26.8 (23.9 to 30.0)        | -1.4 (-1.8 to -0.9)                            | -18.3 (-24.0 to -12.3)              |
| Nicaragua                           | 26.6 (24.0 to 29.0)        | 24.4 (21.9 to 27.0)        | 23.8 (21.3 to 26.2)        | 22.6 (19.1 to 26.5)        | -0.5 (-1.1 to 0.1)                             | -7.4 (-15.3 to 1.5)                 |
| Panama                              | 20.7 (18.9 to 22.8)        | 15.5 (14.1 to 17.1)        | 15.2 (13.7 to 16.8)        | 13.0 (10.9 to 15.5)        | -1.2 (-1.8 to -0.5)                            | -16.2 (-23.8 to -7.6)               |
| Venezuela                           | 37.5 (34.4 to 40.5)        | 32.4 (29.1 to 35.8)        | 31.7 (28.4 to 35.3)        | 29.0 (23.6 to 34.8)        | -0.8 (-1.5 to -0.0)                            | -10.7 (-19.7 to -0.5)               |
| <b>Tropical Latin America</b>       |                            |                            |                            |                            |                                                |                                     |
| Brazil                              | 43.0 (40.4 to 45.8)        | 20.7 (19.4 to 22.0)        | 19.2 (17.7 to 20.7)        | 11.7 (10.2 to 13.5)        | -3.8 (-4.4 to -3.2)                            | -43.6 (-48.0 to -38.0)              |
| Paraguay                            | 41.5 (39.2 to 43.9)        | 29.0 (26.7 to 31.2)        | 28.2 (25.8 to 30.6)        | 23.0 (19.9 to 26.6)        | -1.6 (-2.1 to -1.0)                            | -20.7 (-26.8 to -14.1)              |
| <b>North Africa and Middle East</b> |                            |                            |                            |                            |                                                |                                     |
| <b>North Africa and Middle East</b> |                            |                            |                            |                            |                                                |                                     |
| Afghanistan                         | 21.3 (19.1 to 23.5)        | 22.2 (20.3 to 24.1)        | 21.4 (19.5 to 23.3)        | 22.0 (19.0 to 25.3)        | -0.1 (-0.6 to 0.5)                             | -0.9 (-9.0 to 7.8)                  |
| Algeria                             | 40.8 (37.7 to 44.0)        | 36.8 (33.6 to 39.9)        | 35.8 (32.6 to 39.0)        | 32.9 (28.4 to 37.5)        | -0.8 (-1.2 to -0.3)                            | -10.8 (-16.9 to -4.2)               |
| Bahrain                             | 22.6 (21.1 to 24.2)        | 22.1 (19.9 to 24.2)        | 21.9 (19.7 to 24.2)        | 21.9 (18.4 to 25.7)        | -0.1 (-0.6 to 0.5)                             | -1.1 (-9.1 to 7.9)                  |
| Egypt                               | 38.3 (35.8 to 40.9)        | 38.3 (36.3 to 40.5)        | 37.7 (35.4 to 40.0)        | 37.6 (33.7 to 41.7)        | -0.1 (-0.6 to 0.3)                             | -2.0 (-8.4 to 4.6)                  |
| Iran                                | 28.4 (26.5 to 30.6)        | 27.7 (25.5 to 29.9)        | 27.0 (24.6 to 29.2)        | 26.7 (22.7 to 31.2)        | -0.3 (-0.9 to 0.4)                             | -3.9 (-12.1 to 5.6)                 |
| Iraq                                | 35.7 (33.5 to 37.9)        | 38.4 (35.9 to 41.0)        | 37.4 (34.9 to 40.1)        | 38.1 (33.9 to 42.6)        | -0.1 (-0.5 to 0.4)                             | -0.8 (-7.1 to 5.9)                  |
| Jordan                              | 48.5 (46.0 to 50.9)        | 49.5 (46.8 to 52.3)        | 48.7 (45.7 to 51.8)        | 51.0 (45.7 to 57.3)        | 0.2 (-0.3 to 0.7)                              | 3.0 (-4.5 to 10.4)                  |
| Kuwait                              | 36.2 (33.9 to 38.5)        | 35.7 (33.5 to 37.9)        | 34.3 (32.0 to 36.5)        | 33.3 (29.5 to 37.3)        | -0.5 (-0.9 to 0.0)                             | -6.7 (-13.2 to 0.0)                 |
| Lebanon                             | 58.3 (55.9 to 61.0)        | 61.4 (58.4 to 64.3)        | 59.6 (56.4 to 62.8)        | 60.9 (54.7 to 67.4)        | -0.1 (-0.5 to 0.4)                             | -0.9 (-7.4 to 5.8)                  |
| Libya                               | 34.2 (32.3 to 36.3)        | 30.4 (28.4 to 32.4)        | 29.4 (27.2 to 31.5)        | 26.7 (23.6 to 30.1)        | -0.9 (-1.3 to -0.4)                            | -12.1 (-18.2 to -6.0)               |

|                                               | Estimate in 2000 (95% UIs) | Estimate in 2015 (95% UIs) | Estimate in 2017 (95% UIs) | Estimate in 2030 (95% UIs) | Annualised rate of change, 2015-2030 (95% UIs) | Percent change, 2015-2030 (95% UIs) |
|-----------------------------------------------|----------------------------|----------------------------|----------------------------|----------------------------|------------------------------------------------|-------------------------------------|
| Morocco                                       | 27.3 (26.0 to 28.6)        | 22.0 (20.1 to 24.1)        | 21.7 (19.8 to 23.9)        | 19.0 (16.2 to 22.2)        | -1.0 (-1.5 to -0.4)                            | -13.9 (-20.4 to -6.2)               |
| Palestine                                     | 43.6 (42.7 to 44.5)        | 42.8 (40.7 to 44.9)        | 42.2 (39.8 to 44.6)        | 47.8 (42.8 to 52.2)        | 0.7 (0.2 to 1.3)                               | 11.7 (3.3 to 21.0)                  |
| Oman                                          | 17.7 (16.2 to 19.5)        | 15.9 (14.3 to 17.6)        | 15.5 (13.9 to 17.1)        | 14.4 (12.2 to 16.9)        | -0.7 (-1.3 to -0.0)                            | -9.3 (-17.5 to -0.3)                |
| Qatar                                         | 24.8 (22.7 to 26.9)        | 23.5 (21.7 to 25.4)        | 22.8 (21.0 to 24.9)        | 22.4 (19.0 to 26.2)        | -0.3 (-1.0 to 0.4)                             | -4.9 (-13.9 to 6.3)                 |
| Saudi Arabia                                  | 21.7 (20.1 to 23.2)        | 20.2 (18.6 to 21.8)        | 19.1 (17.6 to 20.8)        | 18.0 (15.5 to 20.7)        | -0.8 (-1.3 to -0.2)                            | -10.9 (-18.2 to -3.4)               |
| Sudan                                         | 17.0 (15.3 to 18.7)        | 13.3 (11.9 to 14.7)        | 12.7 (11.3 to 14.1)        | 10.8 (9.0 to 12.8)         | -1.4 (-2.0 to -0.7)                            | -18.7 (-26.0 to -10.2)              |
| Syria                                         | 44.7 (41.8 to 47.5)        | 35.7 (33.0 to 38.6)        | 34.6 (31.9 to 37.5)        | 29.6 (26.0 to 33.5)        | -1.3 (-1.7 to -0.8)                            | -17.2 (-22.4 to -11.7)              |
| Tunisia                                       | 47.5 (45.4 to 49.5)        | 45.1 (42.2 to 47.8)        | 43.9 (41.0 to 46.8)        | 41.8 (37.1 to 46.5)        | -0.5 (-0.9 to -0.1)                            | -7.4 (-12.9 to -1.8)                |
| Turkey                                        | 64.7 (62.5 to 66.9)        | 51.4 (49.2 to 53.5)        | 50.2 (47.8 to 52.8)        | 43.4 (39.6 to 47.6)        | -1.1 (-1.5 to -0.7)                            | -15.5 (-20.6 to -10.0)              |
| United Arab Emirates                          | 26.0 (24.0 to 28.0)        | 27.4 (25.1 to 29.8)        | 26.9 (24.6 to 29.4)        | 28.5 (24.4 to 33.0)        | 0.3 (-0.3 to 0.8)                              | 4.0 (-4.6 to 13.1)                  |
| Yemen                                         | 33.4 (31.4 to 35.3)        | 34.5 (32.4 to 36.7)        | 34.0 (31.6 to 36.3)        | 35.9 (31.5 to 40.9)        | 0.3 (-0.3 to 0.8)                              | 3.9 (-4.2 to 13.3)                  |
| <b>South Asia</b>                             |                            |                            |                            |                            |                                                |                                     |
| <b>South Asia</b>                             |                            |                            |                            |                            |                                                |                                     |
| Bangladesh                                    | 40.8 (39.5 to 42.1)        | 42.0 (40.0 to 44.0)        | 41.6 (39.3 to 43.8)        | 41.7 (37.6 to 45.6)        | -0.1 (-0.4 to 0.3)                             | -0.9 (-6.0 to 4.3)                  |
| Bhutan                                        | 19.0 (17.2 to 21.0)        | 14.9 (13.5 to 16.3)        | 14.5 (13.1 to 16.0)        | 12.7 (10.6 to 15.1)        | -1.1 (-1.7 to -0.4)                            | -14.8 (-22.9 to -5.5)               |
| India                                         | 31.0 (29.6 to 32.6)        | 23.8 (22.5 to 25.1)        | 22.4 (21.0 to 23.9)        | 18.0 (16.1 to 20.1)        | -1.9 (-2.3 to -1.3)                            | -24.3 (-29.6 to -18.2)              |
| Nepal                                         | 66.2 (64.0 to 68.6)        | 43.8 (41.4 to 46.2)        | 42.4 (39.7 to 45.1)        | 33.4 (29.9 to 37.3)        | -1.8 (-2.2 to -1.4)                            | -23.8 (-28.4 to -18.7)              |
| Pakistan                                      | 37.2 (35.0 to 39.5)        | 27.1 (25.4 to 28.8)        | 26.3 (24.6 to 28.1)        | 21.6 (19.2 to 24.4)        | -1.5 (-2.0 to -1.0)                            | -20.2 (-25.9 to -14.4)              |
| <b>Southeast Asia, East Asia, and Oceania</b> |                            |                            |                            |                            |                                                |                                     |
| <b>East Asia</b>                              |                            |                            |                            |                            |                                                |                                     |
| China                                         | 48.7 (47.7 to 49.7)        | 47.3 (45.6 to 49.1)        | 46.5 (44.4 to 48.7)        | 44.9 (41.2 to 48.6)        | -0.4 (-0.7 to -0.0)                            | -5.3 (-10.5 to -0.1)                |
| North Korea                                   | 44.5 (42.1 to 46.8)        | 40.4 (38.2 to 42.8)        | 39.7 (37.3 to 42.2)        | 37.3 (33.7 to 41.1)        | -0.5 (-0.9 to -0.2)                            | -7.7 (-12.8 to -2.5)                |
| Taiwan (Province of China)                    | 42.5 (40.0 to 45.2)        | 37.0 (34.5 to 39.5)        | 36.4 (33.8 to 39.0)        | 33.9 (29.9 to 38.5)        | -0.6 (-1.1 to -0.1)                            | -8.3 (-15.0 to -1.0)                |
| <b>Oceania</b>                                |                            |                            |                            |                            |                                                |                                     |
| American Samoa                                | 58.3 (54.1 to 62.9)        | 54.8 (50.3 to 59.8)        | 54.2 (49.6 to 59.2)        | 53.2 (46.5 to 61.2)        | -0.2 (-0.7 to 0.3)                             | -3.0 (-9.9 to 4.8)                  |
| Federated States of Micronesia                | 60.4 (55.6 to 65.4)        | 57.9 (53.9 to 62.0)        | 57.3 (53.2 to 62.0)        | 57.3 (50.8 to 64.9)        | -0.1 (-0.5 to 0.5)                             | -1.1 (-7.8 to 7.4)                  |
| Fiji                                          | 58.3 (55.5 to 60.8)        | 50.8 (47.6 to 53.8)        | 50.2 (46.9 to 53.4)        | 47.0 (41.6 to 52.5)        | -0.5 (-1.0 to -0.1)                            | -7.7 (-13.6 to -0.9)                |
| Guam                                          | 58.3 (54.9 to 61.9)        | 51.6 (48.9 to 54.5)        | 51.1 (48.0 to 54.5)        | 49.4 (43.4 to 56.0)        | -0.3 (-0.9 to 0.3)                             | -4.4 (-12.3 to 4.2)                 |
| Kiribati                                      | 90.6 (87.9 to 93.6)        | 84.5 (80.2 to 88.5)        | 82.7 (78.1 to 87.2)        | 81.5 (73.3 to 90.0)        | -0.3 (-0.6 to 0.2)                             | -3.7 (-9.2 to 2.6)                  |
| Marshall Islands                              | 38.8 (36.5 to 41.1)        | 37.2 (34.4 to 40.2)        | 36.9 (34.0 to 40.1)        | 36.6 (31.9 to 42.0)        | -0.1 (-0.6 to 0.4)                             | -1.8 (-8.7 to 6.8)                  |
| Northern Mariana Islands                      | 56.0 (51.2 to 61.4)        | 51.9 (47.9 to 56.9)        | 51.5 (46.6 to 56.7)        | 50.6 (43.7 to 58.8)        | -0.2 (-0.7 to 0.4)                             | -2.4 (-9.7 to 6.0)                  |
| Papua New Guinea                              | 70.4 (66.2 to 74.6)        | 64.3 (60.7 to 68.1)        | 63.6 (59.8 to 67.8)        | 61.3 (55.1 to 68.7)        | -0.3 (-0.8 to 0.1)                             | -4.8 (-10.9 to 2.2)                 |
| Samoa                                         | 60.4 (57.1 to 64.0)        | 57.5 (53.7 to 60.7)        | 56.7 (52.9 to 60.7)        | 55.7 (49.6 to 63.0)        | -0.2 (-0.6 to 0.2)                             | -3.1 (-9.2 to 3.6)                  |
| Solomon Islands                               | 54.2 (51.0 to 57.8)        | 52.4 (49.1 to 56.0)        | 51.3 (47.9 to 55.1)        | 50.3 (44.3 to 57.0)        | -0.3 (-0.8 to 0.2)                             | -4.2 (-10.9 to 3.3)                 |
| Tonga                                         | 62.2 (58.9 to 65.5)        | 56.8 (53.2 to 60.3)        | 56.1 (52.4 to 59.9)        | 53.9 (47.4 to 61.0)        | -0.4 (-0.9 to 0.2)                             | -5.1 (-12.2 to 2.7)                 |
| Vanuatua                                      | 49.2 (46.7 to 51.6)        | 41.6 (39.0 to 43.9)        | 40.8 (38.5 to 43.2)        | 37.0 (33.2 to 41.1)        | -0.8 (-1.2 to -0.3)                            | -11.1 (-17.0 to -4.6)               |
| <b>Southeast Asia</b>                         |                            |                            |                            |                            |                                                |                                     |
| Cambodia                                      | 53.3 (51.8 to 54.9)        | 42.6 (40.7 to 44.7)        | 41.9 (39.7 to 44.1)        | 36.9 (33.4 to 40.5)        | -1.0 (-1.3 to -0.6)                            | -13.4 (-18.2 to -8.3)               |
| Indonesia                                     | 57.2 (55.8 to 58.6)        | 59.9 (57.8 to 62.0)        | 59.2 (57.8 to 61.5)        | 61.9 (57.6 to 65.5)        | 0.2 (-0.1 to 0.5)                              | 3.2 (-1.0 to 7.1)                   |
| Laos                                          | 56.7 (53.7 to 59.2)        | 46.7 (43.9 to 49.5)        | 45.7 (42.8 to 48.8)        | 41.1 (36.7 to 45.8)        | -0.9 (-1.3 to -0.4)                            | -12.0 (-17.2 to -6.2)               |
| Malaysia                                      | 49.0 (46.7 to 51.3)        | 41.6 (39.5 to 43.8)        | 40.6 (38.5 to 43.0)        | 36.2 (32.5 to 40.2)        | -0.9 (-1.4 to -0.5)                            | -13.0 (-18.7 to -7.2)               |
| Maldives                                      | 47.1 (44.4 to 50.1)        | 41.5 (39.5 to 43.7)        | 40.5 (38.5 to 42.9)        | 37.6 (33.6 to 41.9)        | -0.7 (-1.2 to -0.2)                            | -9.4 (-15.9 to -2.4)                |
| Mauritius                                     | 43.0 (40.9 to 45.2)        | 43.0 (40.5 to 45.6)        | 42.4 (39.5 to 45.3)        | 42.4 (37.5 to 47.3)        | -0.1 (-0.6 to 0.4)                             | -1.6 (-8.1 to 5.5)                  |
| Myanmar                                       | 51.5 (49.3 to 53.7)        | 42.5 (40.0 to 44.5)        | 42.2 (40.0 to 44.5)        | 38.9 (35.2 to 43.0)        | -0.6 (-1.0 to -0.2)                            | -8.5 (-13.9 to -2.4)                |
| Philippines                                   | 61.2 (58.7 to 63.6)        | 46.4 (44.4 to 48.7)        | 45.5 (43.2 to 48.0)        | 38.5 (34.8 to 42.4)        | -1.3 (-1.7 to -0.8)                            | -17.1 (-22.3 to -11.4)              |
| Sri Lanka                                     | 30.9 (29.5 to 32.4)        | 26.7 (25.3 to 28.1)        | 26.3 (24.8 to 27.8)        | 23.9 (21.3 to 26.4)        | -0.7 (-1.2 to -0.3)                            | -10.5 (-16.5 to -4.4)               |
| Seychelles                                    | 46.2 (43.3 to 49.4)        | 38.8 (35.9 to 42.0)        | 37.9 (35.0 to 41.0)        | 34.7 (30.4 to 39.6)        | -0.7 (-1.2 to -0.3)                            | -10.6 (-16.5 to -3.8)               |
| Thailand                                      | 45.4 (43.1 to 47.7)        | 40.1 (38.2 to 41.9)        | 39.4 (37.3 to 41.4)        | 36.9 (33.4 to 40.6)        | -0.5 (-1.0 to -0.1)                            | -7.8 (-13.6 to -1.8)                |
| Timor-Leste                                   | 67.2 (64.8 to 69.7)        | 65.8 (63.5 to 68.1)        | 65.2 (62.9 to 67.7)        | 64.8 (61.1 to 68.9)        | -0.1 (-0.3 to 0.1)                             | -1.6 (-4.9 to 2.0)                  |
| Vietnam                                       | 52.6 (51.3 to 53.9)        | 42.2 (40.7 to 43.7)        | 41.5 (39.8 to 43.1)        | 36.4 (33.8 to 39.1)        | -1.0 (-1.3 to -0.7)                            | -13.8 (-17.6 to -10.0)              |
| <b>Sub-Saharan Africa</b>                     |                            |                            |                            |                            |                                                |                                     |
| <b>Central Sub-Saharan Africa</b>             |                            |                            |                            |                            |                                                |                                     |
| Angola                                        | 23.3 (21.0 to 25.6)        | 20.9 (19.0 to 23.0)        | 20.1 (18.4 to 22.2)        | 18.8 (16.2 to 21.9)        | -0.7 (-1.3 to -0.1)                            | -10.0 (-17.3 to -0.7)               |
| Central African Republic                      | 24.8 (22.3 to 27.4)        | 18.9 (16.8 to 21.1)        | 18.3 (16.3 to 20.5)        | 15.5 (13.1 to 18.4)        | -1.3 (-1.9 to -0.7)                            | -17.9 (-25.1 to -9.5)               |
| Congo                                         | 21.4 (19.5 to 23.6)        | 20.5 (18.8 to 22.4)        | 19.7 (17.9 to 21.6)        | 18.8 (16.1 to 22.3)        | -0.6 (-1.2 to 0.1)                             | -8.2 (-16.6 to 2.2)                 |
| Democratic Republic of the Congo              | 22.6 (20.5 to 25.1)        | 20.0 (18.0 to 22.1)        | 19.6 (17.5 to 21.7)        | 17.8 (15.0 to 20.7)        | -0.8 (-1.3 to -0.2)                            | -11.2 (-18.1 to -2.7)               |
| Equatorial Guinea                             | 20.6 (18.3 to 23.1)        | 17.1 (15.1 to 18.4)        | 16.5 (14.7 to 18.4)        | 14.4 (12.1 to 17.1)        | -1.2 (-1.8 to -0.5)                            | -16.0 (-23.7 to -7.7)               |
| Gabon                                         | 25.1 (22.7 to 27.7)        | 21.7 (19.6 to 24.1)        | 20.9 (18.8 to 23.2)        | 19.2 (16.4 to 22.6)        | -0.8 (-1.4 to -0.1)                            | -11.4 (-18.7 to -1.8)               |
| <b>Eastern Sub-Saharan Africa</b>             |                            |                            |                            |                            |                                                |                                     |
| Burundi                                       | 21.4 (19.2 to 23.8)        | 19.6 (17.7 to 21.5)        | 19.2 (17.2 to 21.1)        | 18.7 (15.5 to 22.0)        | -0.3 (-1.0 to 0.4)                             | -4.7 (-14.4 to 5.6)                 |
| Comoros                                       | 24.8 (22.6 to 27.1)        | 20.2 (18.5 to 22.0)        | 19.5 (17.9 to 21.3)        | 16.9 (14.7 to 19.5)        | -1.2 (-1.8 to -0.6)                            | -16.6 (-23.7 to -9.2)               |
| Dibouti                                       | 36.0 (33.9 to 38.1)        | 31.4 (29.1 to 33.8)        | 30.4 (28.1 to 32.9)        | 27.6 (24.1 to 31.7)        | -0.9 (-1.4 to -0.3)                            | -12.1 (-18.5 to -4.8)               |
| Eritrea                                       | 9.2 (8.2 to 10.4)          | 7.7 (6.8 to 8.7)           | 7.4 (6.5 to 8.4)           | 6.5 (5.3 to 7.8)           | -1.2 (-1.9 to -0.5)                            | -16.2 (-24.3 to -6.9)               |
| Ethiopia                                      | 9.4 (8.4 to 10.4)          | 7.8 (7.2 to 8.6)           | 7.6 (6.9 to 8.4)           | 6.8 (5.7 to 7.9)           | -1.0 (-1.6 to -0.3)                            | -13.8 (-21.8 to -4.6)               |
| Kenya                                         | 28.6 (27.0 to 30.2)        | 20.3 (18.9 to 21.9)        | 19.6 (18.1 to 21.3)        | 16.1 (13.9 to 18.5)        | -1.6 (-2.1 to -1.0)                            | -21.0 (-26.9 to -14.5)              |
| Madagascar                                    | 28.6 (26.2 to 31.0)        | 25.2 (23.1 to 27.5)        | 24.8 (22.6 to 27.5)        | 22.8 (19.6 to 26.5)        | -0.7 (-1.2 to -0.1)                            | -9.8 (-16.8 to -2.0)                |
| Malawi                                        | 25.5 (23.7 to 27.4)        | 21.2 (19.5 to 23.1)        | 20.5 (18.7 to 22.5)        | 17.9 (15.3 to 21.1)        | -1.1 (-1.7 to -0.5)                            | -15.7 (-22.8 to -7.3)               |
| Mozambique                                    | 27.2 (25.3 to 29.2)        | 24.6 (22.9 to 26.4)        | 23.5 (21.7 to 25.4)        | 22.2 (19.1 to 25.4)        | -0.7 (-1.3 to -0.1)                            | -9.5 (-17.4 to -1.2)                |
| Rwanda                                        | 26.3 (24.3 to 28.5)        | 23.1 (21.5 to 24.7)        | 22.2 (20.6 to 23.9)        | 20.0 (17.3 to 22.9)        | -1.0 (-1.6 to -0.4)                            | -13.3 (-21.2 to -5.4)               |
| Somalia                                       | 18.0 (16.1 to 20.0)        | 14.1 (12.6 to 15.9)        | 13.8 (12.3 to 15.4)        | 11.7 (9.8 to 13.7)         | -1.3 (-1.9 to -0.7)                            | -17.4 (-24.5 to -9.7)               |
| South Sudan                                   | 20.2 (18.1 to 22.3)        | 18.7 (16.7 to 20.9)        | 18.4 (16.4 to 20.4)        | 17.7 (15.4 to 20.6)        | -0.4 (-0.9 to 0.2)                             | -5.3 (-12.9 to 2.5)                 |
| Tanzania                                      | 29.0 (27.0 to 31.2)        | 24.2 (22.3 to 26.2)        | 23.3 (21.4 to 25.4)        | 20.3 (18.1 to 24.1)        | -1.0 (-1.5 to -0.4)                            | -14.0 (-20.3 to -6.5)               |
| Uganda                                        | 24.8 (23.0 to 26.6)        | 20.4 (19.1 to 22.0)        | 19.5 (18.2 to 21.2)        | 17.9 (15.2 to 21.4)        | -0.9 (-1.7 to 0.1)                             | -12.5 (-22.0 to -5.9)               |
| Zambia                                        | 32.0 (30.1 to 34.1)        | 32.5 (30.1 to 34.9)        | 31.2 (28.8 to 33.9)        | 32.1 (27.3 to 37.9)        | -0.1 (-0.7 to 0.7)                             | -1.2 (-10.6 to 10.7)                |
| <b>Southern Sub-Saharan Africa</b>            |                            |                            |                            |                            |                                                |                                     |
| Botswana                                      | 39.9 (37.1 to 42.7)        | 34.8 (32.3 to 38.0)        | 34.0 (31.3 to 37.3)        | 31.5 (27.2 to 36.7)        | -0.7 (-1.2 to -0.1)                            | -9.6 (-16.8 to -1.3)                |
| Lesotho                                       | 35.2 (32.8 to 37.9)        | 34.9 (32.9 to 37.0)        | 34.2 (32.1 to 36.4)        | 34.0 (30.2 to 37.9)        | -0.2 (-0.7 to 0.3)                             | -2.4 (-9.7 to 4.4)                  |
| Namibia                                       | 40.8 (38.6 to 43.2)        | 34.0 (31.5 to 36.6)        | 33.1 (30.6 to 36.0)        | 29.6 (25.6 to 34.2)        | -0.9 (-1.5 to -0.4)                            | -12.8 (-19.8 to -5.2)               |
| South Africa                                  | 51.1 (49.1 to 53.4)        | 41.0 (38.4 to 43.7)        | 40.3 (37.5 to 43.3)        | 35.5 (31.1 to 40.8)        | -1.0 (-1.5 to -0.4)                            | -13.5 (-20.1 to -5.7)               |
| Swaziland                                     | 17.4 (16.0 to 18.9)        | 10.5 (9.3 to 11.7)         | 10.0 (8.8 to 11.2)         | 7.5 (6.0 to 9.1)           | -2.3 (-3.0 to -1.5)                            | -28.5 (-35.9 to -19.6)              |



|                                                                               | Estimate in 2000 (95% UIs) | Estimate in 2015 (95% UIs) | Estimate in 2017 (95% UIs) | Estimate in 2020 (95% UIs) | Annualised rate of change, 2015-2020 (95% UIs) | Percent change, 2015-2020 (95% UIs) |
|-------------------------------------------------------------------------------|----------------------------|----------------------------|----------------------------|----------------------------|------------------------------------------------|-------------------------------------|
| Zimbabwe                                                                      | 55.6 (33.3 to 38.0)        | 52.6 (30.5 to 34.7)        | 52.0 (29.9 to 34.3)        | 51.1 (27.5 to 35.2)        | -0.3 (-0.8 to 0.3)                             | -4.7 (-11.8 to 3.8)                 |
| <b>Western Sub-Saharan Africa</b>                                             |                            |                            |                            |                            |                                                |                                     |
| Benin                                                                         | 18.6 (16.9 to 20.4)        | 14.2 (12.9 to 15.7)        | 13.8 (12.5 to 15.3)        | 11.6 (9.9 to 13.7)         | -1.4 (-1.9 to -0.7)                            | -18.2 (-25.2 to -10.5)              |
| Burkina Faso                                                                  | 22.9 (20.8 to 25.0)        | 17.9 (16.3 to 19.6)        | 17.4 (15.7 to 19.1)        | 14.8 (12.6 to 17.3)        | -1.3 (-1.9 to -0.6)                            | -17.2 (-25.2 to -8.6)               |
| Cameroun                                                                      | 20.3 (18.4 to 22.2)        | 15.1 (13.7 to 16.8)        | 14.6 (13.2 to 16.1)        | 11.8 (10.1 to 13.9)        | -1.7 (-2.3 to -1.0)                            | -22.2 (-29.4 to -14.1)              |
| Cape Verde                                                                    | 17.0 (15.2 to 18.9)        | 14.3 (12.8 to 15.8)        | 13.9 (12.4 to 15.4)        | 12.3 (10.3 to 14.4)        | -1.0 (-1.6 to -0.4)                            | -14.0 (-21.8 to -5.7)               |
| Chad                                                                          | 21.2 (19.5 to 22.8)        | 17.8 (16.3 to 19.1)        | 17.2 (15.8 to 18.7)        | 15.3 (13.2 to 17.6)        | -1.0 (-1.5 to -0.4)                            | -13.8 (-20.7 to -6.3)               |
| Cote d'Ivoire                                                                 | 24.3 (22.2 to 26.6)        | 24.3 (22.4 to 26.6)        | 23.6 (21.4 to 25.8)        | 23.4 (20.1 to 27.0)        | -0.3 (-0.8 to 0.3)                             | -3.7 (-11.9 to 4.4)                 |
| The Gambia                                                                    | 29.0 (26.7 to 31.5)        | 21.7 (20.1 to 23.4)        | 21.1 (19.5 to 23.0)        | 17.4 (15.1 to 20.0)        | -1.5 (-2.1 to -0.9)                            | -19.7 (-26.5 to -12.6)              |
| Ghana                                                                         | 11.8 (10.6 to 13.1)        | 9.7 (8.7 to 11.0)          | 9.2 (8.2 to 10.5)          | 8.0 (6.5 to 9.9)           | -1.3 (-2.0 to -0.5)                            | -17.6 (-26.4 to -6.8)               |
| Guinea                                                                        | 15.7 (13.9 to 17.7)        | 13.3 (11.8 to 15.0)        | 13.0 (11.4 to 14.6)        | 11.7 (9.5 to 13.9)         | -0.9 (-1.6 to -0.2)                            | -12.8 (-21.4 to -3.6)               |
| Guinea-Bissau                                                                 | 12.7 (11.2 to 14.3)        | 11.1 (9.7 to 12.6)         | 10.8 (9.4 to 12.3)         | 9.6 (7.9 to 11.6)          | -1.0 (-1.7 to -0.4)                            | -14.1 (-22.2 to -5.8)               |
| Liberia                                                                       | 15.7 (14.1 to 17.4)        | 13.8 (12.5 to 15.3)        | 13.4 (12.1 to 14.9)        | 12.3 (10.4 to 14.4)        | -0.8 (-1.4 to -0.2)                            | -11.4 (-18.8 to -3.2)               |
| Mali                                                                          | 21.6 (19.7 to 23.6)        | 19.8 (18.1 to 21.8)        | 19.2 (17.5 to 21.2)        | 18.1 (15.6 to 21.2)        | -0.6 (-1.1 to -0.0)                            | -8.6 (-15.8 to -0.0)                |
| Mauritania                                                                    | 40.6 (38.0 to 43.3)        | 34.1 (31.1 to 37.2)        | 32.8 (29.8 to 36.1)        | 29.6 (24.9 to 35.0)        | -1.0 (-1.6 to -0.3)                            | -13.2 (-21.5 to -4.1)               |
| Niger                                                                         | 16.4 (14.7 to 18.1)        | 15.3 (13.8 to 16.9)        | 14.8 (13.2 to 16.4)        | 14.3 (11.9 to 17.0)        | -0.4 (-1.1 to 0.2)                             | -6.2 (-15.8 to 3.8)                 |
| Nigeria                                                                       | 10.8 (9.6 to 12.0)         | 7.9 (7.0 to 9.0)           | 7.7 (6.7 to 8.8)           | 6.4 (5.2 to 8.0)           | -1.4 (-2.2 to -0.6)                            | -19.2 (-28.6 to -8.6)               |
| Sao Tome and Principe                                                         | 10.0 (8.9 to 11.2)         | 8.0 (7.1 to 9.0)           | 7.7 (6.8 to 8.7)           | 6.7 (5.5 to 8.0)           | -1.2 (-1.9 to -0.5)                            | -16.7 (-25.1 to -7.3)               |
| Senegal                                                                       | 26.0 (24.0 to 28.1)        | 19.5 (17.9 to 21.4)        | 18.9 (17.2 to 20.9)        | 15.1 (12.8 to 17.9)        | -1.7 (-2.4 to -1.0)                            | -22.8 (-30.0 to -14.5)              |
| Sierra Leone                                                                  | 38.8 (36.0 to 41.7)        | 31.8 (29.9 to 34.0)        | 30.9 (28.8 to 33.1)        | 27.5 (24.2 to 31.1)        | -1.0 (-1.5 to -0.5)                            | -13.6 (-20.4 to -6.9)               |
| Togo                                                                          | 18.1 (16.4 to 19.9)        | 14.3 (13.0 to 15.8)        | 13.8 (12.4 to 15.3)        | 11.9 (10.0 to 14.2)        | -1.3 (-1.9 to -0.5)                            | -17.0 (-25.0 to -7.6)               |
| <b>Indicator 3.b.1.c Coverage of eight vaccines in target populations (%)</b> |                            |                            |                            |                            |                                                |                                     |
| <b>Central Europe, Eastern Europe, and Central Asia</b>                       |                            |                            |                            |                            |                                                |                                     |
| <b>Central Asia</b>                                                           |                            |                            |                            |                            |                                                |                                     |
| Armenia                                                                       | 51.2 (49.4 to 53.0)        | 90.6 (87.6 to 93.0)        | 93.9 (90.4 to 96.3)        | 95.7 (95.6 to 95.7)        | 0.4 (0.2 to 0.6)                               | 5.6 (2.9 to 9.1)                    |
| Azerbaijan                                                                    | 17.5 (16.1 to 18.9)        | 73.3 (69.8 to 76.2)        | 74.5 (70.1 to 78.1)        | 77.5 (77.4 to 77.5)        | 0.4 (0.1 to 0.7)                               | 5.8 (1.7 to 11.0)                   |
| Georgia                                                                       | 35.8 (33.8 to 37.6)        | 77.8 (74.2 to 81.0)        | 84.6 (79.8 to 88.3)        | 92.2 (92.1 to 92.2)        | 1.1 (0.9 to 1.4)                               | 18.5 (13.7 to 24.2)                 |
| Kazakhstan                                                                    | 57.3 (55.9 to 58.4)        | 68.7 (64.7 to 72.0)        | 70.1 (64.8 to 74.4)        | 74.8 (74.7 to 74.8)        | 0.6 (0.2 to 1.0)                               | 8.9 (3.8 to 15.6)                   |
| Kyrgyzstan                                                                    | 45.3 (43.2 to 47.3)        | 65.8 (63.1 to 68.0)        | 74.9 (70.5 to 78.6)        | 77.0 (77.0 to 77.0)        | 1.0 (0.8 to 1.3)                               | 10.0 (7.2 to 12.0)                  |
| Mongolia                                                                      | 54.6 (53.0 to 56.0)        | 69.4 (66.9 to 71.2)        | 81.4 (78.5 to 83.4)        | 83.5 (83.5 to 83.6)        | 1.2 (1.1 to 1.5)                               | 20.4 (17.4 to 24.9)                 |
| Tajikistan                                                                    | 38.7 (37.2 to 40.1)        | 83.0 (80.8 to 84.6)        | 83.7 (81.5 to 85.3)        | 97.0 (97.0 to 97.0)        | 1.0 (0.9 to 1.2)                               | 16.9 (14.7 to 20.9)                 |
| Turkmenistan                                                                  | 46.0 (44.9 to 47.0)        | 67.8 (65.4 to 69.6)        | 68.4 (65.7 to 70.3)        | 82.4 (82.4 to 82.4)        | 1.3 (1.1 to 1.5)                               | 21.6 (18.4 to 26.0)                 |
| Uzbekistan                                                                    | 51.7 (49.5 to 54.0)        | 94.9 (92.0 to 96.8)        | 95.3 (92.1 to 97.2)        | 97.0 (97.0 to 97.0)        | 0.2 (0.0 to 0.4)                               | 2.3 (0.3 to 5.5)                    |
| <b>Central Europe</b>                                                         |                            |                            |                            |                            |                                                |                                     |
| Albania                                                                       | 48.5 (47.5 to 49.2)        | 87.3 (87.1 to 87.4)        | 87.3 (87.1 to 87.4)        | 87.4 (87.4 to 87.4)        | 0.0 (-0.0 to 0.0)                              | 0.1 (-0.0 to 0.3)                   |
| Bosnia and Herzegovina                                                        | 55.2 (53.5 to 56.6)        | 62.5 (59.1 to 65.2)        | 57.8 (53.2 to 61.7)        | 72.5 (72.5 to 72.5)        | 1.0 (0.7 to 1.4)                               | 16.2 (11.2 to 22.7)                 |
| Bulgaria                                                                      | 58.2 (56.6 to 59.4)        | 81.9 (79.1 to 83.9)        | 82.8 (79.0 to 83.3)        | 83.8 (83.8 to 83.8)        | 0.2 (-0.0 to 0.4)                              | 2.4 (-0.1 to 5.9)                   |
| Croatia                                                                       | 59.4 (58.1 to 60.4)        | 72.5 (70.9 to 73.5)        | 71.4 (69.0 to 72.9)        | 84.1 (84.1 to 84.1)        | 1.0 (0.9 to 1.1)                               | 16.0 (14.4 to 18.6)                 |
| Czech Republic                                                                | 48.8 (48.0 to 49.3)        | 73.7 (73.1 to 74.2)        | 73.3 (72.5 to 73.9)        | 86.6 (86.6 to 86.6)        | 1.1 (1.0 to 1.1)                               | 17.5 (16.8 to 18.5)                 |
| Hungary                                                                       | 62.0 (61.5 to 62.2)        | 74.1 (73.6 to 74.7)        | 74.5 (74.1 to 74.7)        | 87.2 (87.2 to 87.2)        | 1.1 (1.1 to 1.1)                               | 17.7 (17.1 to 18.4)                 |
| Macedonia                                                                     | 46.5 (45.4 to 47.4)        | 67.1 (64.7 to 69.2)        | 65.3 (61.9 to 68.1)        | 78.8 (78.8 to 78.8)        | 1.1 (0.9 to 1.3)                               | 17.4 (13.9 to 21.7)                 |
| Montenegro                                                                    | 34.2 (32.5 to 35.4)        | 61.8 (58.4 to 64.8)        | 59.2 (54.5 to 62.3)        | 73.5 (73.5 to 73.6)        | 1.2 (0.8 to 1.5)                               | 19.0 (13.6 to 26.0)                 |
| Poland                                                                        | 61.4 (60.8 to 61.7)        | 73.2 (72.2 to 73.9)        | 73.2 (72.2 to 73.9)        | 86.6 (86.6 to 86.6)        | 1.1 (1.1 to 1.2)                               | 18.3 (17.3 to 20.0)                 |
| Romania                                                                       | 61.6 (61.2 to 61.9)        | 67.4 (64.1 to 69.6)        | 65.2 (61.5 to 68.0)        | 80.0 (80.0 to 80.1)        | 1.1 (0.9 to 1.5)                               | 18.8 (15.0 to 24.5)                 |
| Serbia                                                                        | 45.9 (44.8 to 46.8)        | 71.3 (69.3 to 72.8)        | 71.0 (68.7 to 72.7)        | 84.2 (84.2 to 84.2)        | 1.1 (1.0 to 1.3)                               | 18.0 (15.7 to 21.4)                 |
| Slovakia                                                                      | 70.3 (69.0 to 71.4)        | 86.5 (85.8 to 87.0)        | 86.5 (86.5 to 86.5)        | 86.5 (86.5 to 86.5)        | 0.0 (-0.0 to 0.0)                              | 0.0 (-0.5 to 0.9)                   |
| Slovenia                                                                      | 71.0 (69.2 to 72.4)        | 77.1 (75.0 to 79.3)        | 80.0 (77.5 to 82.3)        | 85.3 (85.5 to 85.3)        | 0.7 (0.5 to 0.9)                               | 10.6 (7.5 to 13.7)                  |
| <b>Eastern Europe</b>                                                         |                            |                            |                            |                            |                                                |                                     |
| Belarus                                                                       | 58.9 (57.5 to 60.1)        | 86.6 (85.8 to 87.0)        | 86.7 (85.8 to 87.1)        | 87.0 (87.0 to 87.0)        | 0.0 (0.0 to 0.1)                               | 0.5 (0.1 to 1.4)                    |
| Estonia                                                                       | 49.2 (46.4 to 52.9)        | 80.5 (78.5 to 82.1)        | 83.2 (81.3 to 84.5)        | 97.0 (97.0 to 97.0)        | 1.2 (1.1 to 1.4)                               | 20.6 (18.2 to 23.6)                 |
| Latvia                                                                        | 67.7 (65.5 to 69.3)        | 90.3 (88.2 to 92.3)        | 94.3 (92.5 to 95.7)        | 98.4 (98.3 to 98.4)        | 0.6 (0.4 to 0.7)                               | 8.9 (6.6 to 11.5)                   |
| Lithuania                                                                     | 58.7 (57.4 to 59.8)        | 81.5 (79.3 to 83.3)        | 83.3 (81.6 to 84.7)        | 85.3 (85.3 to 85.3)        | 0.3 (0.2 to 0.5)                               | 4.8 (2.4 to 7.6)                    |
| Moldova                                                                       | 46.1 (45.1 to 46.9)        | 68.8 (64.1 to 73.2)        | 71.0 (65.0 to 76.8)        | 77.9 (77.8 to 77.9)        | 0.8 (0.4 to 1.3)                               | 13.4 (6.4 to 21.5)                  |
| Russia                                                                        | 48.5 (47.2 to 49.6)        | 77.1 (75.0 to 78.7)        | 81.3 (79.5 to 82.9)        | 86.8 (86.8 to 86.8)        | 0.8 (0.6 to 1.0)                               | 12.6 (10.2 to 15.6)                 |
| Ukraine                                                                       | 49.6 (49.1 to 49.8)        | 41.1 (36.7 to 46.0)        | 45.2 (40.6 to 50.1)        | 56.2 (56.2 to 56.2)        | 2.1 (1.3 to 2.8)                               | 37.2 (22.3 to 53.3)                 |
| <b>High-income</b>                                                            |                            |                            |                            |                            |                                                |                                     |
| <b>Australasia</b>                                                            |                            |                            |                            |                            |                                                |                                     |
| Australia                                                                     | 67.8 (65.3 to 69.6)        | 94.2 (91.5 to 96.0)        | 95.4 (92.6 to 97.2)        | 96.4 (96.4 to 96.4)        | 0.2 (0.0 to 0.4)                               | 2.4 (0.4 to 5.4)                    |
| New Zealand                                                                   | 62.4 (59.7 to 64.9)        | 88.9 (85.7 to 91.6)        | 92.7 (89.4 to 95.0)        | 95.3 (95.3 to 95.3)        | 0.5 (0.3 to 0.7)                               | 7.2 (4.1 to 11.2)                   |
| <b>High-income Asia Pacific</b>                                               |                            |                            |                            |                            |                                                |                                     |
| Brunei                                                                        | 59.9 (58.5 to 60.8)        | 73.7 (72.7 to 74.2)        | 74.1 (73.4 to 74.5)        | 90.0 (90.0 to 90.0)        | 1.3 (1.3 to 1.4)                               | 22.2 (21.2 to 23.9)                 |
| Japan                                                                         | 34.8 (33.6 to 35.6)        | 72.8 (71.4 to 73.7)        | 84.6 (82.3 to 86.0)        | 84.6 (82.3 to 86.0)        | 1.1 (1.0 to 1.2)                               | 17.4 (16.6 to 20.5)                 |
| South Korea                                                                   | 48.6 (45.7 to 51.0)        | 84.7 (83.4 to 85.6)        | 84.7 (83.4 to 85.7)        | 85.4 (85.4 to 85.4)        | 0.1 (-0.0 to 0.2)                              | 0.8 (-0.3 to 2.4)                   |
| Singapore                                                                     | 59.7 (58.4 to 60.7)        | 80.4 (78.1 to 82.0)        | 81.9 (79.3 to 83.7)        | 84.4 (84.4 to 84.4)        | 0.3 (0.2 to 0.5)                               | 5.0 (2.8 to 8.0)                    |
| <b>High-income North America</b>                                              |                            |                            |                            |                            |                                                |                                     |
| Canada                                                                        | 54.3 (52.3 to 56.3)        | 78.8 (75.1 to 82.0)        | 82.7 (77.9 to 86.7)        | 93.8 (93.8 to 93.8)        | 1.2 (0.9 to 1.5)                               | 19.0 (14.4 to 24.9)                 |
| Greenland                                                                     | 58.6 (57.3 to 59.5)        | 69.2 (66.9 to 71.0)        | 70.8 (68.8 to 72.2)        | 84.3 (84.3 to 84.3)        | 1.3 (1.1 to 1.5)                               | 21.8 (18.7 to 26.1)                 |
| United States                                                                 | 72.7 (71.4 to 73.8)        | 90.2 (87.7 to 92.2)        | 91.1 (87.9 to 93.5)        | 94.3 (94.3 to 94.3)        | 0.3 (0.1 to 0.5)                               | 4.6 (2.3 to 7.5)                    |
| <b>Southern Latin America</b>                                                 |                            |                            |                            |                            |                                                |                                     |
| Argentina                                                                     | 57.9 (54.7 to 61.1)        | 84.7 (81.1 to 87.8)        | 86.2 (81.3 to 89.9)        | 90.9 (90.9 to 90.9)        | 0.5 (0.2 to 0.8)                               | 7.3 (3.5 to 12.1)                   |
| Chile                                                                         | 58.5 (57.1 to 59.6)        | 79.8 (77.2 to 81.9)        | 80.2 (76.7 to 82.6)        | 82.2 (82.2 to 82.2)        | 0.2 (0.0 to 0.4)                               | 3.0 (0.4 to 6.5)                    |
| Uruguay                                                                       | 67.6 (65.6 to 69.4)        | 81.8 (78.9 to 83.8)        | 82.1 (79.1 to 84.2)        | 83.8 (83.8 to 83.8)        | 0.2 (0.0 to 0.4)                               | 2.6 (0.1 to 6.2)                    |
| <b>Western Europe</b>                                                         |                            |                            |                            |                            |                                                |                                     |
| Andorra                                                                       | 65.7 (63.3 to 67.6)        | 83.7 (82.1 to 84.8)        | 85.0 (83.8 to 85.8)        | 86.5 (86.5 to 86.5)        | 0.2 (0.1 to 0.3)                               | 3.3 (2.0 to 5.3)                    |
| Austria                                                                       | 47.3 (44.4 to 50.1)        | 81.2 (78.2 to 83.1)        | 79.0 (74.8 to 81.9)        | 92.7 (92.7 to 92.7)        | 0.9 (0.7 to 1.1)                               | 14.3 (11.6 to 18.6)                 |
| Belgium                                                                       | 55.7 (52.5 to 58.6)        | 95.3 (94.0 to 96.3)        | 96.0 (94.6 to 97.0)        | 98.7 (98.7 to 98.7)        | 0.2 (0.2 to 0.3)                               | 3.6 (2.5 to 5.0)                    |
| Cyprus                                                                        | 57.4 (55.5 to 59.1)        | 81.2 (79.1 to 82.8)        | 82.4 (80.3 to 84.0)        | 84.5 (84.5 to 84.5)        | 0.3 (0.1 to 0.4)                               | 4.1 (2.0 to 6.8)                    |
| Denmark                                                                       | 58.7 (57.4 to 59.7)        | 69.4 (67.2 to 71.1)        | 71.2 (69.5 to 72.4)        | 87.9 (87.9 to 87.9)        | 1.6 (1.4 to 1.8)                               | 26.6 (23.6 to 30.7)                 |
| Finland                                                                       | 58.3 (56.8 to 59.5)        | 81.4 (79.1 to 83.2)        | 80.1 (75.9 to 82.8)        | 94.0 (94.0 to 94.0)        | 1.0 (0.8 to 1.2)                               | 15.5 (13.0 to 18.8)                 |
| France                                                                        | 55.1 (52.7 to 57.6)        | 80.2 (78.2 to 81.9)        | 81.0 (78.4 to 82.8)        | 87.6 (87.6 to 87.6)        | 0.6 (0.5 to 0.8)                               | 9.2 (7.0 to 12.0)                   |

|                                     | Estimate in 2000 (95% UIs) | Estimate in 2015 (95% UIs) | Estimate in 2017 (95% UIs) | Estimate in 2020 (95% UIs) | Annualised rate of change, 2015-2020 (95% UIs) | Percent change, 2015-2020 (95% UIs) |
|-------------------------------------|----------------------------|----------------------------|----------------------------|----------------------------|------------------------------------------------|-------------------------------------|
| Germany                             | 52.4 (49.5 to 54.9)        | 85.4 (80.6 to 86.0)        | 87.2 (84.0 to 90.1)        | 97.1 (97.1 to 97.1)        | 1.0 (0.8 to 1.2)                               | 16.4 (12.8 to 20.5)                 |
| Greece                              | 63.2 (59.7 to 66.2)        | 85.0 (83.4 to 86.4)        | 88.0 (86.1 to 89.9)        | 99.1 (99.1 to 99.1)        | 1.0 (0.9 to 1.1)                               | 16.6 (14.7 to 18.8)                 |
| Iceland                             | 59.3 (57.5 to 60.6)        | 68.3 (65.7 to 70.4)        | 68.0 (65.0 to 70.2)        | 82.9 (82.9 to 82.9)        | 1.3 (1.1 to 1.6)                               | 21.4 (17.8 to 26.2)                 |
| Ireland                             | 49.6 (47.2 to 51.9)        | 82.3 (80.2 to 84.0)        | 83.6 (80.3 to 85.0)        | 95.6 (95.6 to 95.6)        | 1.0 (0.9 to 1.2)                               | 16.1 (13.9 to 19.2)                 |
| Israel                              | 71.3 (69.7 to 72.4)        | 94.3 (91.6 to 96.2)        | 95.2 (92.2 to 97.2)        | 96.5 (96.5 to 96.5)        | 0.2 (0.0 to 0.3)                               | 2.3 (0.3 to 5.3)                    |
| Italy                               | 53.1 (51.5 to 54.5)        | 82.7 (80.7 to 84.2)        | 85.1 (82.8 to 87.0)        | 97.1 (97.1 to 97.1)        | 1.1 (0.9 to 1.2)                               | 17.7 (15.3 to 20.3)                 |
| Luxembourg                          | 65.2 (62.4 to 67.6)        | 94.9 (93.7 to 95.9)        | 93.8 (92.2 to 95.2)        | 99.5 (99.5 to 99.5)        | 0.3 (0.2 to 0.4)                               | 4.9 (3.8 to 6.2)                    |
| Malta                               | 39.6 (37.6 to 41.5)        | 70.7 (69.0 to 72.5)        | 70.0 (67.8 to 71.5)        | 84.5 (84.4 to 84.5)        | 1.2 (1.1 to 1.3)                               | 19.5 (17.3 to 22.3)                 |
| Netherlands                         | 60.3 (59.0 to 61.2)        | 82.2 (79.8 to 84.0)        | 82.2 (79.2 to 84.2)        | 86.6 (86.6 to 86.6)        | 0.3 (0.2 to 0.5)                               | 5.4 (3.1 to 8.5)                    |
| Norway                              | 56.2 (53.9 to 58.0)        | 72.1 (70.1 to 73.8)        | 84.5 (80.4 to 87.4)        | 96.6 (96.6 to 96.6)        | 2.0 (1.8 to 2.1)                               | 34.0 (30.9 to 37.9)                 |
| Portugal                            | 62.0 (59.4 to 64.2)        | 82.1 (79.0 to 84.3)        | 84.5 (82.7 to 85.8)        | 84.5 (86.2 to 86.2)        | 0.3 (0.1 to 0.6)                               | 5.1 (2.3 to 9.1)                    |
| Spain                               | 67.7 (65.8 to 69.2)        | 72.2 (70.4 to 73.3)        | 83.1 (80.4 to 84.8)        | 85.5 (85.5 to 85.5)        | 1.1 (1.0 to 1.3)                               | 18.5 (16.7 to 21.4)                 |
| Sweden                              | 59.7 (58.6 to 60.6)        | 80.9 (79.3 to 82.3)        | 84.7 (82.5 to 86.9)        | 98.1 (98.1 to 98.1)        | 1.3 (1.2 to 1.4)                               | 21.3 (19.2 to 23.8)                 |
| Switzerland                         | 52.0 (49.7 to 53.9)        | 72.1 (70.1 to 74.0)        | 75.8 (73.2 to 78.2)        | 88.6 (88.6 to 88.6)        | 1.4 (1.2 to 1.6)                               | 22.9 (19.6 to 26.4)                 |
| United Kingdom                      | 55.0 (53.1 to 56.3)        | 81.7 (79.3 to 83.3)        | 92.4 (87.6 to 95.4)        | 95.9 (95.9 to 95.9)        | 1.1 (0.9 to 1.3)                               | 17.5 (15.1 to 20.9)                 |
| <b>Latin America and Caribbean</b>  |                            |                            |                            |                            |                                                |                                     |
| <b>Andean Latin America</b>         |                            |                            |                            |                            |                                                |                                     |
| Bolivia                             | 48.1 (46.3 to 49.8)        | 79.7 (76.3 to 82.2)        | 79.6 (75.6 to 82.7)        | 93.8 (93.8 to 93.9)        | 1.1 (0.9 to 1.4)                               | 17.8 (14.2 to 22.9)                 |
| Ecuador                             | 37.3 (35.3 to 39.3)        | 77.8 (71.5 to 83.1)        | 77.8 (70.4 to 83.5)        | 85.0 (85.0 to 85.1)        | 0.6 (0.2 to 1.2)                               | 9.4 (2.3 to 18.9)                   |
| Peru                                | 35.3 (34.2 to 36.3)        | 76.0 (71.8 to 79.8)        | 75.5 (69.6 to 80.4)        | 83.8 (83.7 to 83.8)        | 0.6 (0.3 to 1.0)                               | 10.2 (5.0 to 16.6)                  |
| <b>Caribbean</b>                    |                            |                            |                            |                            |                                                |                                     |
| Antigua and Barbuda                 | 63.2 (60.5 to 65.6)        | 67.2 (65.1 to 69.1)        | 66.3 (63.6 to 68.6)        | 80.4 (80.4 to 80.5)        | 1.2 (1.0 to 1.4)                               | 19.7 (16.4 to 23.5)                 |
| The Bahamas                         | 43.1 (41.5 to 44.4)        | 76.5 (73.3 to 79.4)        | 82.1 (77.4 to 86.1)        | 89.3 (89.3 to 89.3)        | 1.0 (0.8 to 1.3)                               | 16.7 (12.4 to 21.8)                 |
| Barbados                            | 45.5 (42.5 to 48.5)        | 76.1 (72.8 to 78.9)        | 75.2 (70.8 to 78.5)        | 78.1 (78.1 to 78.1)        | 0.2 (-0.1 to 0.5)                              | 2.6 (-0.9 to 7.2)                   |
| Belize                              | 38.5 (36.7 to 40.1)        | 65.0 (62.2 to 67.6)        | 67.5 (63.4 to 71.6)        | 87.3 (87.3 to 87.4)        | 2.0 (1.7 to 2.3)                               | 34.4 (29.3 to 40.4)                 |
| Bermuda                             | 36.5 (35.6 to 37.1)        | 36.9 (36.1 to 37.2)        | 36.8 (36.1 to 37.2)        | 85.9 (85.9 to 85.9)        | 5.6 (5.6 to 5.8)                               | 133.1 (130.6 to 137.6)              |
| Cuba                                | 53.6 (51.4 to 55.5)        | 70.9 (69.2 to 72.3)        | 71.2 (69.3 to 72.6)        | 84.2 (84.2 to 84.2)        | 1.1 (1.0 to 1.3)                               | 18.7 (16.4 to 21.7)                 |
| Dominica                            | 34.9 (34.0 to 35.6)        | 66.5 (63.6 to 68.7)        | 64.2 (60.1 to 67.3)        | 77.4 (77.4 to 77.4)        | 1.0 (0.8 to 1.3)                               | 16.5 (12.7 to 21.6)                 |
| Dominican Republic                  | 31.0 (29.7 to 32.1)        | 56.8 (53.4 to 60.3)        | 59.0 (53.4 to 63.9)        | 82.8 (82.7 to 82.9)        | 2.5 (2.1 to 3.0)                               | 45.8 (37.3 to 56.1)                 |
| Grenada                             | 58.5 (56.0 to 60.9)        | 65.0 (62.0 to 67.3)        | 62.7 (59.0 to 65.9)        | 66.6 (66.6 to 66.7)        | 0.2 (-0.1 to 0.4)                              | 2.6 (-0.9 to 6.8)                   |
| Guyana                              | 33.6 (32.7 to 34.4)        | 93.4 (90.8 to 95.5)        | 93.9 (90.9 to 96.1)        | 96.4 (96.4 to 96.4)        | 0.2 (0.1 to 0.4)                               | 3.2 (0.9 to 6.1)                    |
| Haiti                               | 22.1 (20.9 to 23.4)        | 47.1 (42.8 to 51.3)        | 52.8 (46.5 to 58.8)        | 65.5 (65.5 to 65.6)        | 2.2 (1.6 to 2.8)                               | 39.4 (27.7 to 53.0)                 |
| Jamaica                             | 33.6 (32.7 to 34.3)        | 76.4 (74.8 to 77.8)        | 78.8 (77.2 to 80.1)        | 86.1 (86.0 to 86.1)        | 0.8 (0.7 to 0.9)                               | 12.6 (10.6 to 15.0)                 |
| Puerto Rico                         | 52.0 (44.3 to 57.5)        | 78.5 (72.0 to 82.5)        | 78.9 (71.8 to 83.2)        | 91.9 (91.9 to 91.9)        | 1.1 (0.7 to 1.6)                               | 17.3 (11.3 to 27.7)                 |
| Saint Lucia                         | 42.2 (40.3 to 43.6)        | 65.8 (63.4 to 67.7)        | 62.6 (59.2 to 65.5)        | 77.4 (77.4 to 77.5)        | 1.1 (0.9 to 1.3)                               | 17.7 (14.4 to 22.2)                 |
| Saint Vincent and the Grenadines    | 46.6 (45.5 to 47.5)        | 68.9 (66.5 to 70.6)        | 69.2 (66.5 to 71.1)        | 82.1 (82.1 to 82.2)        | 1.2 (1.0 to 1.4)                               | 19.3 (16.4 to 23.3)                 |
| Suriname                            | 31.4 (30.4 to 32.3)        | 56.0 (53.1 to 58.6)        | 62.6 (57.4 to 67.3)        | 74.7 (74.7 to 74.7)        | 1.9 (1.6 to 2.3)                               | 33.5 (27.4 to 40.7)                 |
| Trinidad and Tobago                 | 32.5 (30.8 to 34.3)        | 54.6 (49.9 to 58.9)        | 54.7 (48.6 to 60.1)        | 59.0 (59.0 to 59.1)        | 0.5 (0.0 to 1.1)                               | 8.4 (0.2 to 18.4)                   |
| Virgin Islands, U.S.                | 35.9 (27.3 to 44.4)        | 60.9 (50.3 to 69.7)        | 60.9 (48.9 to 71.2)        | 73.4 (73.4 to 73.4)        | 1.3 (0.3 to 2.5)                               | 21.4 (5.4 to 45.8)                  |
| <b>Central Latin America</b>        |                            |                            |                            |                            |                                                |                                     |
| Colombia                            | 56.8 (54.8 to 58.5)        | 87.4 (82.8 to 90.7)        | 88.5 (83.7 to 92.1)        | 92.7 (92.6 to 92.7)        | 0.4 (0.1 to 0.8)                               | 6.1 (2.1 to 11.9)                   |
| Costa Rica                          | 63.2 (60.0 to 65.8)        | 85.7 (84.0 to 86.3)        | 86.6 (86.1 to 86.9)        | 87.3 (87.3 to 87.3)        | 0.1 (0.1 to 0.2)                               | 1.9 (1.1 to 2.8)                    |
| El Salvador                         | 56.4 (54.2 to 58.2)        | 90.8 (86.6 to 93.7)        | 93.1 (89.2 to 95.8)        | 95.7 (95.7 to 95.7)        | 0.4 (0.1 to 0.7)                               | 3.5 (2.2 to 10.5)                   |
| Guatemala                           | 34.9 (34.2 to 35.5)        | 63.3 (56.2 to 69.7)        | 78.1 (70.9 to 84.1)        | 85.4 (85.3 to 85.5)        | 2.0 (1.4 to 2.8)                               | 35.3 (22.6 to 52.0)                 |
| Honduras                            | 56.1 (54.1 to 57.7)        | 78.1 (74.3 to 81.2)        | 80.8 (77.3 to 83.3)        | 94.7 (94.6 to 94.7)        | 1.3 (1.0 to 1.6)                               | 21.3 (16.6 to 27.4)                 |
| Mexico                              | 64.0 (61.9 to 65.8)        | 82.1 (77.2 to 86.6)        | 84.2 (78.5 to 88.9)        | 89.0 (88.9 to 89.0)        | 0.5 (0.2 to 0.9)                               | 8.5 (2.7 to 15.3)                   |
| Nicaragua                           | 52.9 (50.7 to 54.6)        | 87.3 (87.1 to 87.4)        | 98.2 (97.4 to 98.9)        | 99.9 (99.9 to 99.9)        | 0.9 (0.9 to 0.9)                               | 14.5 (14.3 to 14.7)                 |
| Panama                              | 63.3 (61.2 to 65.4)        | 82.4 (77.3 to 86.7)        | 85.0 (79.2 to 89.8)        | 90.3 (90.2 to 90.3)        | 0.6 (0.3 to 1.0)                               | 9.7 (4.1 to 16.8)                   |
| Venezuela                           | 25.9 (24.1 to 27.8)        | 60.7 (56.0 to 65.2)        | 63.4 (57.0 to 69.2)        | 77.6 (77.5 to 77.6)        | 1.6 (1.2 to 2.2)                               | 28.0 (19.1 to 38.5)                 |
| <b>Tropical Latin America</b>       |                            |                            |                            |                            |                                                |                                     |
| Brazil                              | 58.9 (57.6 to 59.9)        | 94.8 (93.6 to 95.7)        | 92.3 (90.5 to 93.8)        | 97.2 (97.2 to 97.2)        | 0.2 (0.1 to 0.2)                               | 2.6 (1.5 to 3.8)                    |
| Paraguay                            | 30.9 (29.6 to 32.0)        | 91.1 (88.6 to 93.2)        | 93.8 (91.7 to 95.4)        | 97.7 (97.7 to 97.7)        | 0.5 (0.3 to 0.6)                               | 7.3 (4.8 to 10.2)                   |
| <b>North Africa and Middle East</b> |                            |                            |                            |                            |                                                |                                     |
| <b>North Africa and Middle East</b> |                            |                            |                            |                            |                                                |                                     |
| Afghanistan                         | 10.2 (8.8 to 11.8)         | 45.1 (41.0 to 49.3)        | 53.2 (47.6 to 58.6)        | 59.5 (59.4 to 59.5)        | 1.9 (1.3 to 2.5)                               | 32.2 (20.6 to 45.0)                 |
| Algeria                             | 45.6 (44.2 to 46.8)        | 70.9 (68.4 to 72.5)        | 83.0 (80.1 to 85.0)        | 84.5 (84.5 to 84.5)        | 1.2 (1.0 to 1.4)                               | 19.2 (16.5 to 23.5)                 |
| Bahrain                             | 71.8 (70.5 to 72.8)        | 98.5 (97.5 to 99.3)        | 98.5 (97.1 to 99.3)        | 99.0 (98.9 to 99.0)        | 0.0 (-0.0 to 0.1)                              | 0.3 (-0.4 to 1.5)                   |
| Egypt                               | 56.4 (54.9 to 57.6)        | 71.7 (70.0 to 72.9)        | 72.2 (70.4 to 73.4)        | 85.3 (85.3 to 85.3)        | 1.2 (1.1 to 1.3)                               | 19.1 (17.1 to 21.9)                 |
| Iran                                | 61.8 (61.4 to 62.1)        | 74.4 (73.6 to 74.7)        | 74.4 (73.7 to 74.7)        | 87.1 (87.1 to 87.1)        | 1.1 (1.0 to 1.1)                               | 17.1 (16.6 to 18.4)                 |
| Iraq                                | 38.1 (36.4 to 39.6)        | 55.5 (50.6 to 60.3)        | 64.0 (56.4 to 69.9)        | 79.5 (79.4 to 79.6)        | 2.4 (1.8 to 3.0)                               | 43.6 (31.8 to 57.2)                 |
| Jordan                              | 54.1 (53.3 to 54.7)        | 83.9 (81.8 to 85.2)        | 84.6 (82.5 to 85.9)        | 97.9 (97.9 to 97.9)        | 1.0 (0.9 to 1.2)                               | 16.7 (14.9 to 19.7)                 |
| Kuwait                              | 68.9 (66.7 to 70.5)        | 86.2 (84.8 to 86.9)        | 86.6 (85.4 to 87.1)        | 86.8 (86.8 to 86.8)        | 0.1 (0.0 to 0.2)                               | 0.8 (-0.1 to 2.4)                   |
| Lebanon                             | 53.1 (51.0 to 54.9)        | 74.0 (69.8 to 77.6)        | 77.0 (73.0 to 80.2)        | 82.2 (82.2 to 82.2)        | 0.7 (0.4 to 1.1)                               | 11.2 (5.9 to 17.7)                  |
| Libya                               | 55.6 (53.2 to 57.7)        | 91.2 (87.4 to 94.2)        | 87.5 (87.7 to 91.7)        | 87.7 (87.7 to 87.7)        | -0.3 (-0.5 to 0.0)                             | -3.8 (-6.8 to 0.4)                  |
| Morocco                             | 39.4 (37.8 to 41.1)        | 92.5 (89.6 to 94.8)        | 93.5 (90.0 to 95.9)        | 95.8 (95.7 to 95.8)        | 0.2 (0.1 to 0.4)                               | 3.5 (1.0 to 6.9)                    |
| Palestine                           | 45.0 (43.7 to 46.0)        | 84.3 (83.1 to 85.3)        | 95.5 (93.8 to 96.7)        | 99.0 (99.0 to 99.0)        | 1.1 (1.0 to 1.2)                               | 17.4 (16.1 to 19.2)                 |
| Oman                                | 62.1 (61.7 to 62.2)        | 86.6 (85.6 to 87.1)        | 86.6 (85.5 to 87.1)        | 86.9 (86.9 to 86.9)        | 0.0 (-0.0 to 0.1)                              | 0.4 (-0.2 to 1.5)                   |
| Qatar                               | 64.8 (62.6 to 66.7)        | 94.8 (91.8 to 96.7)        | 95.0 (92.1 to 97.0)        | 96.9 (96.9 to 96.9)        | 0.1 (0.0 to 0.4)                               | 2.2 (0.2 to 5.6)                    |
| Saudi Arabia                        | 59.1 (57.5 to 60.3)        | 97.3 (95.2 to 98.4)        | 97.3 (95.0 to 98.6)        | 98.0 (98.0 to 98.0)        | 0.1 (-0.0 to 0.2)                              | 0.8 (-0.4 to 3.0)                   |
| Sudan                               | 22.8 (21.2 to 24.3)        | 80.5 (76.1 to 84.5)        | 83.0 (77.6 to 87.4)        | 91.7 (91.7 to 91.8)        | 0.9 (0.6 to 1.2)                               | 14.0 (8.6 to 20.6)                  |
| Syria                               | 51.6 (49.6 to 53.3)        | 40.4 (36.4 to 44.8)        | 44.3 (39.1 to 49.5)        | 59.0 (58.9 to 59.0)        | 2.5 (1.8 to 3.2)                               | 46.5 (31.7 to 61.9)                 |
| Tunisia                             | 54.1 (51.3 to 56.4)        | 71.3 (69.3 to 72.8)        | 71.5 (69.3 to 73.0)        | 84.5 (84.5 to 84.6)        | 1.1 (1.0 to 1.3)                               | 18.7 (16.1 to 22.1)                 |
| Turkey                              | 45.4 (43.1 to 47.4)        | 82.4 (80.1 to 83.8)        | 82.4 (80.3 to 84.1)        | 85.0 (85.0 to 85.0)        | 0.2 (0.1 to 0.4)                               | 3.2 (1.5 to 6.2)                    |
| United Arab Emirates                | 64.9 (62.3 to 67.2)        | 92.7 (89.0 to 95.3)        | 92.4 (88.2 to 95.5)        | 94.2 (94.2 to 94.2)        | 0.1 (-0.1 to 0.4)                              | 1.7 (-1.1 to 5.8)                   |
| Yemen                               | 26.9 (25.5 to 28.3)        | 57.6 (51.9 to 62.9)        | 58.5 (51.0 to 65.5)        | 69.1 (69.0 to 69.2)        | 1.2 (0.6 to 1.9)                               | 20.2 (9.9 to 33.1)                  |
| <b>South Asia</b>                   |                            |                            |                            |                            |                                                |                                     |
| <b>South Asia</b>                   |                            |                            |                            |                            |                                                |                                     |
| Bangladesh                          | 30.0 (29.0 to 30.9)        | 75.5 (72.3 to 78.0)        | 78.5 (75.4 to 81.0)        | 83.4 (83.4 to 83.4)        | 0.7 (0.4 to 1.0)                               | 10.6 (6.9 to 15.4)                  |
| Bhutan                              | 47.6 (46.6 to 48.3)        | 72.9 (71.7 to 73.8)        | 73.4 (72.1 to 74.2)        | 74.2 (74.2 to 74.2)        | 0.1 (0.0 to 0.2)                               | 1.7 (0.5 to 3.5)                    |
| India                               | 22.6 (22.2 to 23.2)        | 50.8 (48.5 to 52.6)        | 63.0 (60.9 to 64.9)        | 87.0 (86.9 to 87.1)        | 3.6 (3.4 to 3.9)                               | 71.5 (65.5 to 79.2)                 |

|                                               | Estimate in 2000 (95% UIs) | Estimate in 2015 (95% UIs) | Estimate in 2017 (95% UIs) | Estimate in 2030 (95% UIs) | Annualised rate of change, 2015-2030 (95% UIs) | Percent change, 2015-2030 (95% UIs) |
|-----------------------------------------------|----------------------------|----------------------------|----------------------------|----------------------------|------------------------------------------------|-------------------------------------|
| Nepal                                         | 32.0 (31.1 to 32.8)        | 65.6 (62.0 to 68.6)        | 71.4 (67.7 to 74.7)        | 83.3 (83.7 to 83.3)        | 1.6 (1.3 to 2.0)                               | 27.0 (21.3 to 34.3)                 |
| Pakistan                                      | 27.5 (26.3 to 28.5)        | 62.3 (58.7 to 65.7)        | 70.9 (65.5 to 75.5)        | 88.8 (88.5 to 88.9)        | 2.4 (2.0 to 2.8)                               | 42.6 (35.2 to 51.2)                 |
| <b>Southeast Asia, East Asia, and Oceania</b> |                            |                            |                            |                            |                                                |                                     |
| <b>East Asia</b>                              |                            |                            |                            |                            |                                                |                                     |
| China                                         | 46.0 (40.0 to 49.6)        | 81.0 (76.3 to 85.3)        | 87.6 (82.0 to 91.8)        | 98.5 (98.5 to 98.5)        | 1.3 (1.0 to 1.7)                               | 21.8 (15.5 to 29.1)                 |
| North Korea                                   | 32.3 (30.6 to 33.8)        | 72.9 (71.1 to 73.9)        | 73.3 (71.7 to 74.2)        | 85.8 (85.8 to 85.8)        | 1.1 (1.0 to 1.2)                               | 17.7 (16.1 to 20.6)                 |
| Taiwan (Province of China)                    | 57.3 (51.1 to 60.5)        | 84.8 (82.0 to 86.4)        | 85.2 (82.6 to 86.6)        | 85.7 (85.7 to 85.7)        | 0.1 (-0.1 to 0.3)                              | 1.0 (-0.8 to 4.5)                   |
| <b>Oceania</b>                                |                            |                            |                            |                            |                                                |                                     |
| American Samoa                                | 35.9 (34.4 to 36.8)        | 35.5 (33.6 to 36.6)        | 35.4 (33.6 to 36.5)        | 83.2 (83.2 to 83.2)        | 5.7 (5.5 to 6.0)                               | 134.7 (127.6 to 147.6)              |
| Federated States of Micronesia                | 48.8 (45.6 to 51.9)        | 59.3 (54.3 to 63.7)        | 59.3 (54.3 to 62.8)        | 71.0 (71.0 to 71.1)        | 1.2 (0.7 to 1.8)                               | 20.0 (11.5 to 30.8)                 |
| Fiji                                          | 50.6 (48.1 to 52.8)        | 85.6 (82.2 to 88.7)        | 86.6 (82.3 to 90.0)        | 90.8 (90.9 to 90.9)        | 0.4 (0.2 to 0.7)                               | 6.1 (2.4 to 10.5)                   |
| Guam                                          | 37.1 (36.6 to 37.3)        | 36.6 (35.5 to 37.1)        | 36.5 (35.4 to 37.1)        | 85.4 (85.4 to 85.4)        | 5.7 (5.6 to 5.8)                               | 133.5 (130.2 to 140.4)              |
| Kiribati                                      | 29.4 (27.1 to 31.4)        | 59.6 (53.7 to 65.2)        | 61.7 (54.2 to 68.8)        | 69.3 (69.2 to 69.3)        | 1.0 (0.4 to 1.7)                               | 16.4 (6.2 to 29.0)                  |
| Marshall Islands                              | 36.2 (33.5 to 39.3)        | 54.3 (49.2 to 59.4)        | 56.0 (49.6 to 62.5)        | 70.1 (70.0 to 70.2)        | 1.7 (1.1 to 2.4)                               | 29.4 (18.1 to 42.6)                 |
| Northern Mariana Islands                      | 37.1 (36.6 to 37.3)        | 36.9 (36.2 to 37.2)        | 36.9 (36.2 to 37.2)        | 86.0 (86.0 to 86.0)        | 5.6 (5.6 to 5.8)                               | 133.0 (130.8 to 137.2)              |
| Papua New Guinea                              | 28.3 (26.1 to 30.3)        | 40.6 (37.1 to 44.1)        | 46.9 (41.3 to 52.6)        | 55.7 (55.6 to 55.8)        | 2.1 (1.6 to 2.7)                               | 37.5 (26.2 to 50.3)                 |
| Samoa                                         | 36.6 (34.8 to 38.3)        | 45.7 (41.9 to 49.0)        | 46.2 (41.3 to 50.8)        | 60.6 (60.5 to 60.6)        | 1.9 (1.4 to 2.5)                               | 32.7 (23.6 to 44.7)                 |
| Solomon Islands                               | 37.0 (34.9 to 39.0)        | 57.3 (53.6 to 60.5)        | 61.5 (57.2 to 64.9)        | 76.4 (76.4 to 76.5)        | 1.9 (1.6 to 2.4)                               | 33.6 (26.3 to 42.6)                 |
| Tonga                                         | 44.6 (43.0 to 46.0)        | 67.7 (65.2 to 69.8)        | 68.4 (65.5 to 70.7)        | 82.2 (82.2 to 82.2)        | 1.3 (1.1 to 1.5)                               | 21.5 (17.7 to 26.0)                 |
| Vanuatu                                       | 43.5 (41.9 to 44.7)        | 37.9 (34.6 to 41.2)        | 38.7 (34.5 to 42.9)        | 51.2 (51.2 to 51.3)        | 2.0 (1.5 to 2.6)                               | 35.7 (24.4 to 48.1)                 |
| <b>Southeast Asia</b>                         |                            |                            |                            |                            |                                                |                                     |
| Cambodia                                      | 24.0 (22.5 to 25.4)        | 76.0 (72.7 to 78.6)        | 79.3 (75.7 to 82.0)        | 84.0 (84.0 to 84.0)        | 0.7 (0.4 to 1.0)                               | 10.5 (6.9 to 15.5)                  |
| Indonesia                                     | 30.3 (28.6 to 32.0)        | 49.2 (45.7 to 52.6)        | 50.7 (46.2 to 54.7)        | 60.4 (60.4 to 60.5)        | 1.4 (0.9 to 1.9)                               | 23.0 (14.8 to 32.2)                 |
| Laos                                          | 12.2 (11.0 to 13.6)        | 53.7 (49.6 to 57.3)        | 55.4 (50.0 to 59.8)        | 75.0 (75.0 to 75.1)        | 2.2 (1.8 to 2.8)                               | 39.9 (30.9 to 51.4)                 |
| Malaysia                                      | 41.2 (39.2 to 42.9)        | 68.8 (66.0 to 70.8)        | 69.0 (66.1 to 71.1)        | 82.5 (82.4 to 82.5)        | 1.2 (1.0 to 1.5)                               | 20.0 (16.5 to 25.0)                 |
| Maldives                                      | 45.0 (43.6 to 46.3)        | 74.2 (73.4 to 74.6)        | 74.3 (73.6 to 74.7)        | 86.9 (86.9 to 86.9)        | 1.1 (1.0 to 1.1)                               | 17.1 (16.4 to 18.3)                 |
| Mauritius                                     | 40.5 (38.4 to 42.4)        | 76.8 (73.5 to 79.7)        | 84.3 (79.1 to 89.0)        | 93.0 (92.9 to 93.0)        | 1.3 (1.0 to 1.6)                               | 21.1 (16.7 to 26.5)                 |
| Myanmar                                       | 32.5 (31.5 to 33.4)        | 53.0 (49.6 to 56.2)        | 61.8 (56.4 to 66.7)        | 71.7 (71.7 to 71.8)        | 2.0 (1.6 to 2.5)                               | 35.4 (27.7 to 44.6)                 |
| Philippines                                   | 34.2 (32.9 to 35.5)        | 71.8 (67.1 to 75.8)        | 77.1 (71.2 to 81.9)        | 86.4 (86.3 to 86.4)        | 1.2 (0.9 to 1.7)                               | 20.3 (14.0 to 28.8)                 |
| Sri Lanka                                     | 35.8 (34.9 to 36.5)        | 73.4 (72.0 to 74.2)        | 73.5 (72.0 to 74.3)        | 86.4 (86.4 to 86.4)        | 1.1 (1.0 to 1.2)                               | 17.6 (16.4 to 19.9)                 |
| Seychelles                                    | 36.5 (34.8 to 38.0)        | 69.7 (67.3 to 71.6)        | 67.9 (62.7 to 72.3)        | 94.8 (94.7 to 94.8)        | 2.0 (1.9 to 2.3)                               | 36.0 (32.4 to 40.7)                 |
| Thailand                                      | 58.7 (57.5 to 59.8)        | 59.0 (57.5 to 60.1)        | 59.1 (57.4 to 60.3)        | 84.1 (84.1 to 84.1)        | 24.2 (2.2 to 2.5)                              | 42.6 (39.9 to 46.4)                 |
| Timor-Leste                                   | 12.0 (10.2 to 13.9)        | 54.9 (52.6 to 56.8)        | 63.8 (61.2 to 66.1)        | 70.8 (70.8 to 70.8)        | 1.7 (1.5 to 2.0)                               | 29.0 (24.6 to 34.5)                 |
| Vietnam                                       | 38.7 (37.2 to 40.0)        | 65.7 (62.9 to 68.0)        | 66.6 (63.6 to 69.1)        | 81.5 (81.5 to 81.5)        | 1.4 (1.2 to 1.7)                               | 24.1 (19.9 to 29.7)                 |
| <b>Sub-Saharan Africa</b>                     |                            |                            |                            |                            |                                                |                                     |
| <b>Central Sub-Saharan Africa</b>             |                            |                            |                            |                            |                                                |                                     |
| Angola                                        | 18.9 (17.4 to 20.3)        | 36.5 (31.7 to 41.8)        | 37.5 (31.0 to 44.3)        | 59.5 (59.4 to 59.7)        | 3.3 (2.4 to 4.2)                               | 63.8 (42.6 to 87.8)                 |
| Central African Republic                      | 16.0 (14.6 to 17.5)        | 33.5 (29.4 to 38.0)        | 35.5 (29.2 to 41.9)        | 47.9 (47.8 to 48.0)        | 2.4 (1.5 to 3.3)                               | 43.8 (25.9 to 63.2)                 |
| Congo                                         | 14.2 (12.4 to 15.9)        | 53.4 (47.3 to 58.8)        | 53.4 (45.9 to 60.1)        | 71.6 (71.5 to 71.7)        | 2.0 (1.3 to 2.8)                               | 34.4 (21.7 to 51.2)                 |
| Democratic Republic of the Congo              | 14.8 (13.3 to 16.4)        | 53.2 (49.3 to 56.8)        | 54.9 (50.2 to 59.2)        | 74.0 (70.3 to 70.5)        | 1.9 (1.4 to 2.4)                               | 32.5 (24.0 to 42.7)                 |
| Equatorial Guinea                             | 11.2 (9.9 to 12.6)         | 17.2 (14.1 to 20.6)        | 20.0 (15.8 to 24.3)        | 35.3 (35.2 to 35.4)        | 4.8 (3.6 to 6.1)                               | 106.5 (71.6 to 151.2)               |
| Gabon                                         | 13.7 (12.2 to 15.3)        | 45.1 (42.2 to 47.8)        | 45.4 (41.5 to 48.5)        | 68.1 (68.0 to 68.1)        | 2.8 (2.4 to 3.2)                               | 51.2 (42.3 to 61.5)                 |
| <b>Eastern Sub-Saharan Africa</b>             |                            |                            |                            |                            |                                                |                                     |
| Burundi                                       | 29.2 (28.0 to 30.1)        | 88.5 (85.5 to 90.8)        | 89.9 (85.9 to 92.6)        | 94.9 (94.9 to 94.9)        | 0.5 (0.3 to 0.7)                               | 7.2 (4.6 to 11.0)                   |
| Comoros                                       | 24.8 (23.3 to 26.3)        | 50.7 (47.9 to 53.1)        | 59.9 (56.2 to 63.0)        | 78.4 (78.3 to 78.4)        | 2.9 (2.6 to 3.3)                               | 54.7 (47.7 to 63.7)                 |
| Djibouti                                      | 19.5 (18.0 to 21.0)        | 60.8 (55.4 to 66.3)        | 62.6 (55.9 to 69.3)        | 76.1 (76.0 to 76.2)        | 1.5 (0.9 to 2.1)                               | 25.5 (14.8 to 37.6)                 |
| Eritrea                                       | 31.6 (30.3 to 32.6)        | 97.9 (96.9 to 98.6)        | 98.5 (97.8 to 99.1)        | 99.8 (99.8 to 99.8)        | 0.1 (0.1 to 0.2)                               | 2.0 (1.3 to 3.0)                    |
| Ethiopia                                      | 10.7 (9.5 to 11.8)         | 46.2 (41.5 to 51.0)        | 48.7 (42.2 to 55.2)        | 72.4 (72.2 to 72.5)        | 3.0 (2.3 to 3.7)                               | 57.1 (41.5 to 74.2)                 |
| Kenya                                         | 26.9 (25.5 to 28.2)        | 72.0 (68.1 to 75.7)        | 71.8 (66.0 to 76.7)        | 81.2 (81.2 to 81.2)        | 0.8 (0.5 to 1.2)                               | 12.9 (7.2 to 19.2)                  |
| Madagascar                                    | 23.1 (21.8 to 24.3)        | 68.0 (63.3 to 72.0)        | 70.5 (64.9 to 75.2)        | 84.1 (84.1 to 84.2)        | 1.4 (1.0 to 1.9)                               | 23.8 (16.8 to 33.0)                 |
| Malawi                                        | 30.9 (29.8 to 31.8)        | 80.4 (76.9 to 83.2)        | 83.2 (78.6 to 86.9)        | 91.6 (91.6 to 91.7)        | 0.9 (0.6 to 1.2)                               | 14.1 (10.1 to 19.2)                 |
| Mozambique                                    | 25.5 (24.1 to 26.9)        | 75.8 (71.7 to 79.5)        | 83.3 (81.9 to 87.9)        | 95.1 (95.1 to 95.1)        | 1.5 (1.2 to 1.9)                               | 25.5 (19.6 to 32.6)                 |
| Rwanda                                        | 30.7 (29.5 to 31.8)        | 94.9 (92.8 to 96.4)        | 95.7 (93.4 to 97.2)        | 97.9 (97.9 to 97.9)        | 0.2 (0.1 to 0.4)                               | 3.2 (1.6 to 5.5)                    |
| Somalia                                       | 12.4 (11.0 to 13.9)        | 12.8 (10.4 to 15.6)        | 12.8 (10.0 to 16.2)        | 19.7 (19.6 to 19.7)        | 2.9 (1.6 to 4.3)                               | 55.2 (26.3 to 89.2)                 |
| South Sudan                                   | 7.2 (4.2 to 11.2)          | 32.3 (28.9 to 35.8)        | 27.7 (23.2 to 32.2)        | 41.4 (41.4 to 41.5)        | 1.7 (1.0 to 2.4)                               | 28.6 (15.7 to 43.6)                 |
| Tanzania                                      | 30.9 (29.8 to 31.8)        | 82.0 (78.1 to 85.2)        | 85.0 (80.3 to 88.7)        | 92.8 (92.8 to 92.8)        | 0.8 (0.6 to 1.2)                               | 13.2 (8.9 to 18.9)                  |
| Uganda                                        | 22.3 (21.1 to 23.6)        | 57.5 (54.1 to 60.7)        | 65.6 (60.9 to 70.2)        | 87.3 (87.3 to 87.4)        | 2.8 (2.4 to 3.2)                               | 52.0 (43.9 to 61.3)                 |
| Zambia                                        | 30.9 (30.0 to 31.7)        | 89.4 (87.2 to 91.1)        | 94.0 (92.8 to 95.1)        | 99.3 (99.3 to 99.3)        | 0.7 (0.6 to 0.9)                               | 11.1 (9.1 to 13.9)                  |
| <b>Southern Sub-Saharan Africa</b>            |                            |                            |                            |                            |                                                |                                     |
| Botswana                                      | 38.1 (36.0 to 40.1)        | 83.2 (76.7 to 88.4)        | 81.2 (72.7 to 87.8)        | 87.5 (87.5 to 87.6)        | 0.3 (-0.1 to 0.9)                              | 5.4 (-0.9 to 14.1)                  |
| Lesotho                                       | 37.9 (35.9 to 39.7)        | 79.0 (76.2 to 81.2)        | 93.5 (91.6 to 95.2)        | 98.2 (98.2 to 98.2)        | 1.5 (1.3 to 1.7)                               | 24.4 (21.0 to 28.9)                 |
| Namibia                                       | 26.8 (25.5 to 28.0)        | 77.0 (73.3 to 79.9)        | 85.0 (81.4 to 87.9)        | 96.1 (96.1 to 96.1)        | 1.5 (1.2 to 1.8)                               | 25.0 (20.3 to 31.1)                 |
| South Africa                                  | 57.8 (55.3 to 60.0)        | 84.5 (79.8 to 88.1)        | 82.6 (76.3 to 87.3)        | 87.2 (87.1 to 87.2)        | 0.2 (-0.1 to 0.6)                              | 3.2 (-1.1 to 9.2)                   |
| Swaziland                                     | 47.7 (45.3 to 49.7)        | 86.1 (81.7 to 89.2)        | 86.7 (80.8 to 90.7)        | 92.2 (92.1 to 92.2)        | 0.5 (0.2 to 0.8)                               | 7.1 (3.3 to 12.8)                   |
| Zimbabwe                                      | 29.4 (27.6 to 31.2)        | 81.4 (77.4 to 85.1)        | 81.1 (76.0 to 85.7)        | 86.5 (86.5 to 86.5)        | 0.4 (0.1 to 0.7)                               | 6.3 (1.7 to 11.7)                   |
| <b>Western Sub-Saharan Africa</b>             |                            |                            |                            |                            |                                                |                                     |
| Benin                                         | 26.1 (25.0 to 27.3)        | 54.5 (50.3 to 57.8)        | 51.8 (46.0 to 56.5)        | 70.1 (70.0 to 70.2)        | 1.7 (1.3 to 2.2)                               | 28.9 (21.2 to 39.6)                 |
| Burkina Faso                                  | 23.8 (22.5 to 25.0)        | 85.7 (82.3 to 88.5)        | 87.0 (83.3 to 90.0)        | 95.4 (95.3 to 95.4)        | 0.7 (0.5 to 1.0)                               | 11.3 (7.8 to 15.8)                  |
| Cameroon                                      | 23.9 (22.6 to 25.1)        | 68.1 (63.6 to 71.9)        | 72.1 (66.8 to 76.1)        | 89.2 (89.1 to 89.2)        | 1.8 (1.4 to 2.3)                               | 31.0 (24.0 to 40.3)                 |
| Cape Verde                                    | 28.2 (26.8 to 29.6)        | 70.6 (68.4 to 72.2)        | 70.5 (67.6 to 72.4)        | 72.1 (72.1 to 72.1)        | 0.1 (-0.0 to 0.4)                              | 2.2 (-0.1 to 5.4)                   |
| Chad                                          | 10.9 (9.7 to 12.0)         | 31.0 (27.9 to 34.2)        | 30.6 (26.5 to 35.1)        | 46.2 (46.2 to 46.3)        | 2.7 (2.0 to 3.4)                               | 49.5 (35.6 to 65.8)                 |
| Cote d'Ivoire                                 | 28.6 (26.5 to 30.8)        | 53.8 (49.0 to 57.6)        | 63.9 (58.4 to 68.5)        | 85.7 (85.7 to 85.8)        | 3.1 (2.7 to 3.7)                               | 59.7 (48.9 to 75.2)                 |
| The Gambia                                    | 50.7 (48.4 to 52.7)        | 85.8 (81.6 to 89.1)        | 85.0 (80.0 to 89.0)        | 91.5 (91.5 to 91.6)        | 0.4 (0.2 to 0.8)                               | 6.7 (2.8 to 12.2)                   |
| Ghana                                         | 29.7 (28.6 to 30.7)        | 86.8 (82.1 to 90.2)        | 91.2 (87.0 to 94.0)        | 95.6 (95.6 to 95.6)        | 0.6 (0.4 to 1.0)                               | 10.2 (5.9 to 16.5)                  |
| Guinea                                        | 16.7 (15.3 to 18.1)        | 28.7 (24.9 to 32.5)        | 28.6 (23.9 to 33.5)        | 43.2 (43.1 to 43.4)        | 2.7 (1.9 to 3.7)                               | 51.3 (33.0 to 73.7)                 |
| Guinea-Bissau                                 | 20.2 (18.6 to 21.8)        | 68.5 (64.0 to 72.1)        | 66.2 (59.8 to 71.3)        | 84.5 (84.4 to 84.5)        | 1.4 (1.1 to 1.8)                               | 23.4 (17.1 to 31.9)                 |
| Liberia                                       | 21.3 (19.9 to 22.7)        | 47.4 (42.1 to 52.1)        | 61.1 (54.1 to 67.0)        | 77.7 (77.6 to 77.7)        | 3.3 (2.7 to 4.1)                               | 64.2 (49.0 to 84.5)                 |
| Mali                                          | 19.2 (17.6 to 20.9)        | 52.9 (48.7 to 56.8)        | 52.2 (45.8 to 58.2)        | 73.1 (73.0 to 73.2)        | 2.2 (1.7 to 2.7)                               | 38.6 (28.8 to 50.1)                 |
| Mauritania                                    | 21.0 (19.4 to 22.6)        | 65.0 (59.6 to 69.7)        | 70.7 (64.5 to 75.8)        | 88.8 (88.8 to 88.9)        | 2.1 (1.6 to 2.7)                               | 36.8 (27.5 to 49.2)                 |
| Niger                                         | 14.2 (12.7 to 15.7)        | 60.8 (55.4 to 65.7)        | 68.6 (61.7 to 74.7)        | 81.4 (81.3 to 81.4)        | 1.9 (1.4 to 2.6)                               | 34.0 (23.8 to 46.8)                 |

|                                                                                               | Estimate in 2000 (95% UIs) | Estimate in 2015 (95% UIs) | Estimate in 2017 (95% UIs) | Estimate in 2030 (95% UIs) | Annualised rate of change, 2015-2030 (95% UIs) | Percent change, 2015-2030 (95% UIs) |
|-----------------------------------------------------------------------------------------------|----------------------------|----------------------------|----------------------------|----------------------------|------------------------------------------------|-------------------------------------|
| Nigeria                                                                                       | 13.0 (11.7 to 14.5)        | 30.0 (26.3 to 33.9)        | 28.1 (25.1 to 33.5)        | 41.2 (41.2 to 41.3)        | 2.1 (1.3 to 3.0)                               | 38.0 (21.8 to 56.6)                 |
| San Tome and Principe                                                                         | 31.4 (29.9 to 32.6)        | 81.6 (79.2 to 83.3)        | 93.2 (90.0 to 95.3)        | 97.7 (97.0 to 97.8)        | 1.2 (1.1 to 1.4)                               | 19.9 (17.3 to 23.4)                 |
| Senegal                                                                                       | 25.0 (23.4 to 26.5)        | 80.9 (78.0 to 83.7)        | 85.3 (81.7 to 88.4)        | 93.5 (93.5 to 93.5)        | 1.0 (0.7 to 1.2)                               | 15.6 (11.7 to 19.8)                 |
| Sierra Leone                                                                                  | 18.2 (16.8 to 19.6)        | 79.5 (74.7 to 83.6)        | 80.6 (75.3 to 85.1)        | 89.5 (89.4 to 89.5)        | 0.8 (0.5 to 1.2)                               | 12.6 (7.1 to 19.9)                  |
| Togo                                                                                          | 23.0 (21.6 to 24.4)        | 70.8 (66.3 to 74.3)        | 74.5 (69.3 to 78.2)        | 90.6 (90.6 to 90.7)        | 1.6 (1.3 to 2.1)                               | 28.1 (22.0 to 36.6)                 |
| <b>Indicator 3.c.1: Physicians, nurses and midwives, and pharmacists per 1,000 population</b> |                            |                            |                            |                            |                                                |                                     |
| Central Europe, Eastern Europe, and Central Asia                                              |                            |                            |                            |                            |                                                |                                     |
| Central Asia                                                                                  |                            |                            |                            |                            |                                                |                                     |
| Armenia                                                                                       | 5.5 (4.0 to 7.2)           | 11.6 (9.0 to 14.8)         | 12.1 (9.1 to 15.7)         | 21.6 (13.1 to 32.9)        | 4.0 (2.0 to 5.8)                               | 84.5 (34.5 to 139.4)                |
| Azerbaijan                                                                                    | 6.0 (4.2 to 8.4)           | 12.4 (8.2 to 17.4)         | 12.8 (8.7 to 18.1)         | 20.6 (11.6 to 33.9)        | 3.2 (1.3 to 5.1)                               | 63.4 (21.2 to 114.4)                |
| Georgia                                                                                       | 7.9 (5.4 to 11.1)          | 12.3 (9.0 to 16.3)         | 12.9 (9.4 to 17.2)         | 18.9 (10.7 to 29.7)        | 2.7 (0.5 to 4.8)                               | 52.7 (8.3 to 106.6)                 |
| Kazakhstan                                                                                    | 7.9 (5.5 to 11.2)          | 13.2 (8.8 to 18.5)         | 13.8 (9.1 to 19.3)         | 20.7 (10.9 to 34.7)        | 2.8 (0.6 to 4.8)                               | 54.8 (9.7 to 106.9)                 |
| Kyrgyzstan                                                                                    | 4.2 (2.9 to 5.8)           | 5.9 (4.1 to 8.3)           | 6.1 (4.2 to 8.5)           | 8.0 (4.4 to 12.9)          | 1.8 (-0.3 to 3.8)                              | 33.1 (-5.0 to 77.8)                 |
| Mongolia                                                                                      | 6.0 (4.7 to 7.5)           | 12.1 (8.7 to 16.6)         | 12.6 (8.8 to 17.6)         | 22.6 (12.4 to 36.3)        | 4.0 (2.1 to 5.8)                               | 84.6 (36.6 to 139.8)                |
| Tajikistan                                                                                    | 3.5 (2.6 to 4.7)           | 7.2 (5.2 to 9.4)           | 7.6 (5.5 to 10.2)          | 13.4 (7.7 to 21.6)         | 4.0 (2.0 to 5.8)                               | 83.1 (34.7 to 139.9)                |
| Turkmenistan                                                                                  | 5.6 (3.7 to 7.7)           | 9.6 (6.4 to 13.5)          | 10.0 (6.9 to 13.9)         | 15.7 (8.7 to 25.6)         | 3.2 (1.1 to 5.2)                               | 63.2 (18.4 to 117.7)                |
| Uzbekistan                                                                                    | 3.8 (2.6 to 5.3)           | 7.2 (4.9 to 9.9)           | 7.7 (5.2 to 10.5)          | 13.3 (7.1 to 21.6)         | 4.0 (1.8 to 6.0)                               | 83.5 (31.6 to 145.0)                |
| Central Europe                                                                                |                            |                            |                            |                            |                                                |                                     |
| Albania                                                                                       | 4.7 (3.8 to 5.7)           | 7.0 (5.8 to 8.3)           | 7.3 (5.9 to 8.9)           | 10.5 (6.8 to 15.1)         | 2.6 (0.8 to 4.2)                               | 48.2 (13.4 to 88.8)                 |
| Bosnia and Herzegovina                                                                        | 2.8 (1.9 to 4.0)           | 4.1 (2.8 to 5.7)           | 4.3 (2.9 to 6.1)           | 6.5 (3.5 to 10.9)          | 2.9 (0.8 to 5.1)                               | 57.2 (13.1 to 113.9)                |
| Bulgaria                                                                                      | 6.8 (5.2 to 8.4)           | 10.2 (7.3 to 13.7)         | 10.4 (7.4 to 14.2)         | 14.5 (7.7 to 23.8)         | 2.2 (0.1 to 4.2)                               | 40.1 (11.6 to 88.2)                 |
| Croatia                                                                                       | 8.7 (7.4 to 10.1)          | 12.0 (10.9 to 13.3)        | 12.3 (10.8 to 13.9)        | 16.3 (12.4 to 20.6)        | 2.0 (0.7 to 3.1)                               | 34.9 (11.7 to 66.3)                 |
| Czech Republic                                                                                | 13.2 (12.0 to 14.4)        | 16.7 (14.9 to 18.4)        | 17.1 (14.8 to 19.6)        | 20.9 (16.2 to 26.7)        | 1.5 (0.3 to 2.6)                               | 25.1 (4.8 to 47.2)                  |
| Hungary                                                                                       | 7.8 (7.3 to 8.4)           | 7.1 (6.2 to 8.0)           | 7.0 (6.0 to 8.2)           | 6.7 (5.1 to 8.8)           | -0.4 (-1.6 to 0.7)                             | -6.0 (-21.2 to 11.8)                |
| Macedonia                                                                                     | 3.3 (2.3 to 4.7)           | 5.8 (4.0 to 8.3)           | 6.1 (4.1 to 8.6)           | 9.4 (5.2 to 15.5)          | 3.0 (1.0 to 5.2)                               | 58.5 (16.8 to 116.8)                |
| Montenegro                                                                                    | 4.7 (3.2 to 6.6)           | 6.3 (4.4 to 8.7)           | 6.5 (4.6 to 9.2)           | 8.6 (5.0 to 14.2)          | 2.0 (-0.2 to 4.0)                              | 36.2 (-2.4 to 83.5)                 |
| Poland                                                                                        | 6.9 (5.5 to 8.5)           | 9.1 (6.7 to 11.9)          | 9.2 (6.7 to 12.2)          | 11.9 (6.9 to 19.1)         | 1.7 (-0.2 to 3.5)                              | 29.8 (-2.5 to 69.2)                 |
| Romania                                                                                       | 4.5 (3.8 to 5.4)           | 6.3 (5.7 to 7.0)           | 6.5 (5.6 to 7.4)           | 8.4 (6.2 to 11.1)          | 1.9 (0.5 to 3.4)                               | 33.2 (7.5 to 65.7)                  |
| Serbia                                                                                        | 3.1 (2.2 to 4.2)           | 4.5 (3.1 to 6.3)           | 4.7 (3.2 to 6.7)           | 6.5 (3.5 to 11.2)          | 2.3 (0.2 to 4.4)                               | 42.7 (3.8 to 92.1)                  |
| Slovakia                                                                                      | 11.0 (10.0 to 12.1)        | 14.4 (12.9 to 16.1)        | 14.7 (12.7 to 16.9)        | 19.1 (14.7 to 24.4)        | 1.8 (0.7 to 3.0)                               | 32.3 (11.8 to 56.9)                 |
| Slovenia                                                                                      | 8.4 (6.9 to 10.2)          | 12.1 (9.9 to 14.7)         | 12.3 (9.8 to 15.1)         | 16.6 (11.1 to 23.9)        | 2.0 (0.5 to 3.6)                               | 36.6 (7.1 to 70.4)                  |
| Eastern Europe                                                                                |                            |                            |                            |                            |                                                |                                     |
| Belarus                                                                                       | 7.6 (5.6 to 10.3)          | 14.3 (10.6 to 18.3)        | 14.5 (10.4 to 18.8)        | 23.1 (13.1 to 37.7)        | 3.0 (0.8 to 5.3)                               | 59.5 (13.0 to 121.2)                |
| Estonia                                                                                       | 9.4 (8.3 to 10.6)          | 9.8 (8.4 to 11.4)          | 9.8 (8.0 to 11.7)          | 10.3 (7.2 to 14.4)         | 0.2 (-1.3 to 1.8)                              | 4.2 (-17.8 to 31.1)                 |
| Latvia                                                                                        | 10.3 (9.3 to 11.3)         | 10.2 (9.1 to 11.4)         | 10.2 (8.8 to 11.7)         | 10.3 (7.8 to 13.3)         | 0.1 (-1.1 to 1.2)                              | 1.2 (-15.6 to 19.6)                 |
| Lithuania                                                                                     | 8.6 (7.7 to 9.7)           | 10.7 (9.5 to 12.0)         | 10.9 (9.4 to 12.6)         | 13.6 (10.3 to 17.5)        | 1.5 (0.3 to 2.7)                               | 26.6 (4.7 to 50.5)                  |
| Moldova                                                                                       | 2.5 (1.7 to 3.5)           | 4.5 (3.2 to 6.1)           | 4.7 (3.2 to 6.4)           | 6.9 (3.9 to 11.0)          | 2.8 (0.8 to 4.9)                               | 53.5 (13.1 to 107.6)                |
| Russia                                                                                        | 10.3 (8.6 to 12.1)         | 14.5 (11.5 to 17.8)        | 14.6 (11.2 to 18.4)        | 18.5 (11.6 to 28.2)        | 1.5 (-0.3 to 3.2)                              | 25.6 (-4.1 to 61.0)                 |
| Ukraine                                                                                       | 8.4 (6.0 to 11.3)          | 12.7 (9.2 to 17.5)         | 12.9 (9.2 to 17.5)         | 17.4 (9.7 to 28.2)         | 1.9 (-0.3 to 4.0)                              | 35.3 (-3.7 to 83.1)                 |
| High-income                                                                                   |                            |                            |                            |                            |                                                |                                     |
| Australia                                                                                     |                            |                            |                            |                            |                                                |                                     |
| Australia                                                                                     | 18.6 (15.6 to 21.8)        | 16.4 (12.9 to 20.8)        | 16.8 (12.9 to 21.8)        | 16.9 (11.0 to 26.0)        | 0.1 (-1.5 to 1.8)                              | 1.9 (-19.9 to 30.3)                 |
| New Zealand                                                                                   |                            |                            |                            |                            |                                                |                                     |
| New Zealand                                                                                   | 16.4 (13.5 to 19.5)        | 24.3 (18.8 to 30.6)        | 25.1 (19.0 to 32.2)        | 34.1 (21.2 to 51.0)        | 2.1 (0.4 to 3.8)                               | 38.6 (6.1 to 75.9)                  |
| High-income Asia Pacific                                                                      |                            |                            |                            |                            |                                                |                                     |
| Brunei                                                                                        | 6.9 (4.6 to 9.6)           | 10.0 (6.7 to 13.9)         | 10.4 (7.0 to 14.6)         | 14.9 (8.0 to 25.3)         | 2.5 (0.4 to 4.6)                               | 47.3 (6.8 to 98.0)                  |
| Japan                                                                                         | 11.6 (8.8 to 15.1)         | 13.6 (10.8 to 16.8)        | 13.6 (10.6 to 17.2)        | 16.1 (10.2 to 24.3)        | 1.0 (-0.8 to 2.9)                              | 17.4 (-11.8 to 55.1)                |
| South Korea                                                                                   | 4.3 (3.3 to 5.5)           | 8.3 (6.7 to 10.2)          | 8.8 (6.9 to 11.1)          | 15.2 (9.3 to 23.3)         | 3.9 (1.9 to 5.7)                               | 80.5 (32.5 to 135.8)                |
| Singapore                                                                                     | 7.2 (4.9 to 10.3)          | 12.9 (9.0 to 18.4)         | 13.3 (9.1 to 18.8)         | 21.1 (11.6 to 34.4)        | 3.1 (1.1 to 5.0)                               | 61.2 (17.7 to 112.0)                |
| High-income North America                                                                     |                            |                            |                            |                            |                                                |                                     |
| Canada                                                                                        | 15.9 (13.0 to 19.2)        | 19.0 (14.0 to 24.9)        | 19.6 (14.2 to 26.2)        | 24.0 (13.9 to 38.4)        | 1.4 (-0.4 to 3.3)                              | 24.7 (-5.9 to 64.8)                 |
| Greenland                                                                                     | 6.7 (4.4 to 9.8)           | 8.7 (5.8 to 12.9)          | 8.9 (5.9 to 13.1)          | 11.4 (5.9 to 19.9)         | 1.6 (-0.5 to 3.8)                              | 29.2 (-7.7 to 77.0)                 |
| United States                                                                                 | 12.5 (10.3 to 15.1)        | 13.2 (10.8 to 16.1)        | 13.0 (10.4 to 16.2)        | 13.8 (9.2 to 20.1)         | 0.2 (-1.4 to 1.9)                              | 3.8 (-19.2 to 32.2)                 |
| Southern Latin America                                                                        |                            |                            |                            |                            |                                                |                                     |
| Argentina                                                                                     | 4.1 (2.8 to 5.5)           | 5.4 (3.7 to 7.4)           | 5.5 (3.7 to 7.5)           | 7.4 (3.8 to 12.3)          | 1.8 (-0.7 to 4.1)                              | 33.7 (-9.6 to 85.3)                 |
| Chile                                                                                         | 3.3 (2.9 to 3.8)           | 6.3 (5.4 to 7.3)           | 6.6 (5.5 to 8.0)           | 11.8 (8.4 to 16.6)         | 4.1 (2.7 to 5.6)                               | 86.8 (49.7 to 132.4)                |
| Uruguay                                                                                       | 5.5 (4.6 to 6.4)           | 9.6 (7.7 to 11.7)          | 10.2 (7.9 to 12.8)         | 16.6 (10.6 to 24.4)        | 3.5 (1.8 to 5.1)                               | 71.0 (31.2 to 116.4)                |
| Western Europe                                                                                |                            |                            |                            |                            |                                                |                                     |
| Andorra                                                                                       | 16.3 (10.5 to 23.7)        | 18.4 (11.5 to 26.3)        | 18.7 (11.8 to 27.1)        | 21.8 (10.6 to 38.8)        | 0.9 (-1.4 to 3.2)                              | 16.7 (-19.1 to 61.0)                |
| Austria                                                                                       | 13.0 (11.5 to 14.4)        | 15.2 (12.9 to 17.6)        | 15.6 (12.6 to 18.5)        | 18.8 (12.7 to 26.1)        | 1.3 (-0.3 to 2.8)                              | 22.4 (-4.3 to 51.5)                 |
| Belgium                                                                                       | 17.1 (16.0 to 18.1)        | 17.5 (16.0 to 19.2)        | 17.3 (15.4 to 19.4)        | 17.8 (14.3 to 22.0)        | 0.1 (-0.8 to 1.0)                              | 1.2 (-11.9 to 16.6)                 |
| Cyprus                                                                                        | 8.0 (7.1 to 9.0)           | 10.5 (9.4 to 11.8)         | 11.1 (9.6 to 12.8)         | 14.7 (11.1 to 19.3)        | 2.2 (0.9 to 3.4)                               | 39.0 (15.0 to 65.5)                 |
| Denmark                                                                                       | 14.6 (12.5 to 16.6)        | 15.3 (12.5 to 18.4)        | 15.0 (11.7 to 18.8)        | 15.5 (9.9 to 23.0)         | -0.0 (-1.7 to 1.6)                             | 0.5 (-22.7 to 27.3)                 |
| Finland                                                                                       | 21.1 (19.2 to 22.9)        | 17.5 (15.4 to 19.8)        | 17.6 (14.9 to 20.5)        | 15.9 (11.7 to 21.2)        | -0.7 (-2.0 to 0.7)                             | -9.2 (-26.4 to 10.4)                |
| France                                                                                        | 13.1 (12.1 to 14.1)        | 12.4 (11.0 to 14.0)        | 11.9 (9.9 to 13.9)         | 10.9 (8.2 to 14.3)         | -0.9 (-2.1 to 0.3)                             | -12.8 (-26.8 to 4.6)                |
| Germany                                                                                       | 14.5 (13.6 to 15.5)        | 23.5 (21.6 to 25.5)        | 24.6 (22.0 to 27.5)        | 36.0 (29.1 to 44.3)        | 2.8 (1.8 to 3.8)                               | 52.9 (30.3 to 76.8)                 |
| Greece                                                                                        | 8.0 (7.3 to 8.7)           | 9.4 (8.6 to 10.3)          | 9.4 (8.2 to 10.5)          | 10.8 (8.3 to 13.5)         | 0.9 (-0.3 to 2.0)                              | 14.2 (-4.2 to 34.0)                 |
| Iceland                                                                                       | 19.9 (17.7 to 22.2)        | 20.2 (17.7 to 23.0)        | 20.4 (17.2 to 23.9)        | 21.2 (15.5 to 28.7)        | 0.2 (-1.1 to 1.6)                              | 4.3 (-1.7 to 27.8)                  |
| Ireland                                                                                       | 12.8 (11.5 to 14.2)        | 16.8 (14.6 to 19.2)        | 16.8 (14.1 to 19.8)        | 21.3 (15.0 to 28.3)        | 1.5 (0.2 to 2.8)                               | 26.1 (2.4 to 52.0)                  |
| Israel                                                                                        | 7.5 (6.0 to 9.2)           | 9.7 (7.7 to 12.8)          | 10.0 (7.7 to 12.8)         | 12.8 (7.8 to 19.1)         | 1.7 (-0.1 to 3.4)                              | 30.9 (-0.8 to 67.7)                 |
| Italy                                                                                         | 9.2 (8.2 to 10.2)          | 12.0 (10.6 to 13.7)        | 12.3 (10.5 to 14.4)        | 15.8 (11.5 to 21.0)        | 1.8 (0.4 to 3.1)                               | 30.7 (6.6 to 58.2)                  |
| Luxembourg                                                                                    | 9.9 (8.8 to 11.1)          | 13.6 (11.7 to 15.6)        | 13.6 (11.4 to 16.3)        | 17.8 (12.9 to 24.7)        | 1.7 (0.3 to 3.2)                               | 30.6 (5.2 to 61.4)                  |
| Malta                                                                                         | 7.3 (5.0 to 10.4)          | 10.8 (7.0 to 16.1)         | 11.2 (7.2 to 16.8)         | 15.8 (8.1 to 27.5)         | 2.3 (0.1 to 4.4)                               | 44.1 (13.2 to 94.8)                 |
| Netherlands                                                                                   | 23.1 (21.0 to 25.6)        | 26.0 (22.6 to 30.0)        | 26.1 (22.0 to 30.9)        | 29.8 (23.1 to 40.4)        | 0.8 (-0.4 to 2.0)                              | 13.8 (-5.5 to 36.0)                 |
| Norway                                                                                        | 18.9 (17.0 to 21.2)        | 27.1 (23.2 to 31.3)        | 27.4 (22.7 to 32.8)        | 35.9 (25.2 to 49.4)        | 1.8 (0.3 to 3.3)                               | 31.7 (4.9 to 63.2)                  |
| Portugal                                                                                      | 6.6 (5.8 to 7.6)           | 11.1 (9.5 to 12.8)         | 11.8 (9.8 to 14.2)         | 18.6 (13.2 to 25.6)        | 3.4 (2.0 to 4.8)                               | 67.1 (34.5 to 104.4)                |
| Spain                                                                                         | 9.4 (8.6 to 10.3)          | 13.6 (12.2 to 15.2)        | 13.6 (11.8 to 15.8)        | 18.1 (14.0 to 23.8)        | 1.8 (0.6 to 3.0)                               | 32.0 (10.2 to 57.6)                 |
| Sweden                                                                                        | 12.3 (11.1 to 13.7)        | 19.5 (17.1 to 22.2)        | 20.2 (17.0 to 23.8)        | 27.4 (19.6 to 37.1)        | 2.2 (0.9 to 3.6)                               | 40.0 (14.0 to 71.0)                 |
| Switzerland                                                                                   | 20.5 (19.1 to 22.0)        | 22.6 (20.5 to 24.8)        | 22.5 (19.8 to 25.6)        | 25.8 (20.1 to 32.4)        | 0.9 (-0.3 to 1.9)                              | 14.1 (-3.7 to 32.5)                 |
| United Kingdom                                                                                | 16.2 (15.2 to 17.3)        | 18.7 (16.7 to 20.7)        | 18.7 (16.0 to 21.4)        | 21.0 (15.7 to 26.6)        | 0.7 (-0.5 to 1.8)                              | 11.8 (-7.0 to 31.5)                 |
| Latin America and Caribbean                                                                   |                            |                            |                            |                            |                                                |                                     |

|                                               | Estimate in 2000 (95% UIs) | Estimate in 2015 (95% UIs) | Estimate in 2017 (95% UIs) | Estimate in 2020 (95% UIs) | Annualised rate of change, 2015-2020 (95% UIs) | Percent change, 2015-2020 (95% UIs) |
|-----------------------------------------------|----------------------------|----------------------------|----------------------------|----------------------------|------------------------------------------------|-------------------------------------|
| <b>Andean Latin America</b>                   |                            |                            |                            |                            |                                                |                                     |
| Bolivia                                       | 3.9 (3.2 to 4.6)           | 6.8 (4.8 to 9.3)           | 7.2 (5.1 to 9.9)           | 12.3 (6.8 to 20.0)         | 3.7 (1.7 to 5.6)                               | 76.7 (29.8 to 131.3)                |
| Ecuador                                       | 3.1 (2.6 to 3.6)           | 5.2 (3.9 to 6.8)           | 5.4 (4.0 to 7.2)           | 8.1 (4.6 to 13.3)          | 2.8 (0.9 to 4.8)                               | 53.6 (14.0 to 105.9)                |
| Peru                                          | 4.2 (2.8 to 6.2)           | 5.7 (3.7 to 8.0)           | 5.8 (3.8 to 8.2)           | 7.8 (4.1 to 13.7)          | 2.0 (-0.2 to 4.1)                              | 36.0 (-2.9 to 86.0)                 |
| <b>Caribbean</b>                              |                            |                            |                            |                            |                                                |                                     |
| Antigua and Barbuda                           | 6.9 (4.5 to 9.9)           | 9.4 (6.0 to 13.6)          | 9.8 (6.4 to 14.1)          | 13.4 (6.6 to 22.4)         | 2.2 (-0.0 to 4.3)                              | 41.1 (-0.4 to 90.5)                 |
| The Bahamas                                   | 13.4 (9.1 to 19.3)         | 18.9 (12.7 to 26.9)        | 19.3 (12.9 to 27.0)        | 27.4 (14.5 to 47.6)        | 2.3 (0.2 to 4.3)                               | 43.0 (2.7 to 91.9)                  |
| Barbados                                      | 9.3 (6.1 to 13.3)          | 11.8 (7.7 to 16.7)         | 12.1 (7.8 to 17.0)         | 15.5 (8.0 to 26.3)         | 1.6 (-0.4 to 3.8)                              | 29.7 (-6.3 to 75.7)                 |
| Belize                                        | 2.6 (1.8 to 3.8)           | 4.8 (3.1 to 6.9)           | 5.0 (3.2 to 7.2)           | 8.3 (4.2 to 14.2)          | 3.5 (1.3 to 5.7)                               | 72.3 (21.6 to 133.6)                |
| Bermuda                                       | 18.1 (11.8 to 25.8)        | 27.9 (17.7 to 40.3)        | 27.6 (17.3 to 40.2)        | 37.3 (18.0 to 65.1)        | 1.8 (-0.4 to 3.9)                              | 32.0 (-5.9 to 79.8)                 |
| Cuba                                          | 12.7 (11.1 to 14.4)        | 23.5 (17.8 to 30.6)        | 24.5 (18.2 to 32.7)        | 39.0 (23.5 to 61.9)        | 3.2 (1.5 to 5.0)                               | 63.3 (24.4 to 111.2)                |
| Dominica                                      | 4.0 (2.7 to 5.8)           | 6.0 (4.0 to 8.5)           | 6.3 (4.2 to 8.9)           | 9.2 (4.8 to 16.0)          | 2.7 (0.6 to 4.9)                               | 51.1 (9.0 to 109.1)                 |
| Dominican Republic                            | 4.7 (3.6 to 6.1)           | 5.8 (3.9 to 8.3)           | 6.0 (3.9 to 8.8)           | 7.7 (3.5 to 14.9)          | 1.6 (-1.0 to 4.1)                              | 28.6 (-13.9 to 86.2)                |
| Grenada                                       | 4.1 (2.7 to 5.9)           | 5.7 (3.6 to 8.2)           | 5.9 (3.7 to 8.4)           | 8.2 (4.2 to 13.8)          | 2.2 (0.1 to 4.3)                               | 41.6 (1.1 to 89.2)                  |
| Guyana                                        | 2.6 (1.8 to 3.7)           | 4.3 (2.8 to 6.1)           | 4.5 (3.0 to 6.4)           | 6.7 (3.5 to 11.6)          | 2.8 (0.8 to 5.0)                               | 54.5 (12.1 to 112.1)                |
| Haiti                                         | 1.2 (0.8 to 1.7)           | 1.9 (1.3 to 2.8)           | 2.0 (1.4 to 2.9)           | 3.0 (1.6 to 5.1)           | 2.8 (0.7 to 4.7)                               | 53.2 (11.1 to 103.3)                |
| Jamaica                                       | 5.1 (3.4 to 7.5)           | 6.9 (4.5 to 10.1)          | 7.2 (4.8 to 10.6)          | 9.9 (5.2 to 17.3)          | 2.2 (-0.1 to 4.2)                              | 41.0 (-1.5 to 86.5)                 |
| Puerto Rico                                   | 9.3 (5.9 to 13.6)          | 12.7 (8.5 to 18.6)         | 12.9 (8.6 to 18.7)         | 17.2 (9.0 to 30.2)         | 1.9 (-0.4 to 4.2)                              | 34.7 (-6.5 to 87.0)                 |
| Saint Lucia                                   | 4.7 (3.1 to 6.8)           | 7.3 (4.8 to 10.3)          | 7.7 (5.0 to 10.9)          | 11.7 (5.8 to 19.9)         | 2.9 (1.0 to 5.0)                               | 56.9 (15.7 to 110.7)                |
| Saint Vincent and the Grenadines              | 3.5 (2.4 to 5.1)           | 5.6 (3.5 to 8.4)           | 5.8 (3.7 to 8.4)           | 8.6 (4.2 to 15.5)          | 2.7 (0.6 to 5.0)                               | 52.3 (10.1 to 110.4)                |
| Suriname                                      | 5.2 (3.4 to 7.4)           | 6.8 (4.6 to 9.2)           | 6.8 (4.6 to 9.1)           | 8.7 (4.7 to 13.4)          | 1.1 (-1.0 to 3.2)                              | 19.0 (-13.4 to 62.7)                |
| Trinidad and Tobago                           | 4.0 (3.1 to 5.1)           | 6.0 (3.8 to 8.9)           | 6.0 (3.8 to 8.9)           | 8.2 (4.0 to 15.4)          | 1.9 (-0.4 to 4.0)                              | 35.1 (-5.6 to 82.4)                 |
| Virgin Islands, U.S.                          | 11.8 (7.5 to 16.8)         | 15.5 (9.9 to 22.8)         | 15.6 (9.9 to 23.0)         | 19.7 (10.3 to 35.1)        | 1.4 (-0.7 to 3.6)                              | 25.3 (-9.7 to 72.1)                 |
| <b>Central Latin America</b>                  |                            |                            |                            |                            |                                                |                                     |
| Colombia                                      | 3.1 (2.1 to 4.4)           | 4.9 (3.3 to 7.1)           | 5.2 (3.5 to 7.4)           | 7.7 (4.1 to 12.8)          | 2.8 (0.7 to 4.8)                               | 54.8 (10.8 to 106.5)                |
| Costa Rica                                    | 3.4 (2.7 to 4.2)           | 3.8 (2.8 to 5.1)           | 3.9 (2.8 to 5.4)           | 4.8 (2.7 to 8.3)           | 1.4 (-0.8 to 3.4)                              | 24.2 (-10.9 to 66.5)                |
| El Salvador                                   | 2.4 (1.8 to 3.1)           | 4.0 (3.2 to 5.0)           | 4.3 (3.3 to 5.4)           | 6.9 (4.4 to 10.3)          | 3.5 (1.7 to 5.3)                               | 69.9 (28.1 to 122.3)                |
| Guatemala                                     | 1.8 (1.3 to 2.5)           | 3.1 (2.1 to 4.4)           | 3.2 (2.2 to 4.6)           | 5.3 (2.9 to 8.8)           | 3.3 (1.2 to 5.5)                               | 65.4 (19.7 to 127.5)                |
| Honduras                                      | 1.7 (1.1 to 2.4)           | 2.9 (2.0 to 3.9)           | 3.0 (2.1 to 4.2)           | 4.9 (2.7 to 8.7)           | 3.4 (1.4 to 5.2)                               | 67.5 (23.1 to 119.1)                |
| Mexico                                        | 5.1 (3.9 to 6.4)           | 7.7 (6.0 to 9.8)           | 7.8 (6.0 to 10.2)          | 11.2 (6.6 to 17.8)         | 2.4 (0.4 to 4.3)                               | 44.0 (6.2 to 89.4)                  |
| Nicaragua                                     | 1.1 (0.8 to 1.6)           | 2.1 (1.4 to 3.0)           | 2.2 (1.5 to 3.3)           | 3.8 (1.9 to 6.6)           | 3.7 (1.5 to 5.9)                               | 77.3 (25.4 to 141.2)                |
| Panama                                        | 4.5 (3.5 to 5.6)           | 6.6 (4.5 to 9.0)           | 7.0 (4.8 to 9.6)           | 10.2 (5.4 to 16.7)         | 2.8 (0.8 to 4.6)                               | 53.5 (13.3 to 100.2)                |
| Venezuela                                     | 4.2 (3.3 to 5.1)           | 5.1 (3.8 to 6.8)           | 5.0 (3.5 to 6.7)           | 5.8 (3.3 to 9.1)           | 0.6 (-1.1 to 2.4)                              | 11.0 (-14.8 to 43.5)                |
| <b>Tropical Latin America</b>                 |                            |                            |                            |                            |                                                |                                     |
| Brazil                                        | 4.4 (3.4 to 5.7)           | 7.8 (6.5 to 9.2)           | 8.1 (6.4 to 9.9)           | 12.9 (8.1 to 19.7)         | 3.2 (1.3 to 5.3)                               | 64.4 (20.7 to 121.0)                |
| Paraguay                                      | 2.6 (2.1 to 3.1)           | 3.5 (2.7 to 4.6)           | 3.8 (2.8 to 5.0)           | 5.3 (3.1 to 8.4)           | 2.6 (0.7 to 4.4)                               | 48.5 (10.7 to 94.1)                 |
| <b>North Africa and Middle East</b>           |                            |                            |                            |                            |                                                |                                     |
| <b>North Africa and Middle East</b>           |                            |                            |                            |                            |                                                |                                     |
| Afghanistan                                   | 0.4 (0.3 to 0.6)           | 0.7 (0.5 to 1.0)           | 0.7 (0.5 to 1.0)           | 1.1 (0.6 to 1.8)           | 2.9 (0.9 to 4.9)                               | 55.5 (15.2 to 109.6)                |
| Algeria                                       | 2.0 (1.4 to 2.9)           | 4.6 (3.2 to 6.3)           | 4.8 (3.4 to 6.7)           | 9.3 (5.2 to 15.0)          | 4.6 (2.5 to 6.5)                               | 102.0 (45.6 to 165.6)               |
| Bahrain                                       | 7.5 (5.3 to 10.7)          | 12.6 (8.8 to 17.3)         | 12.9 (9.0 to 17.7)         | 19.7 (11.5 to 32.7)        | 2.8 (0.9 to 4.7)                               | 54.9 (14.2 to 103.7)                |
| Egypt                                         | 3.4 (2.6 to 4.3)           | 4.0 (3.6 to 4.2)           | 4.1 (3.7 to 4.5)           | 5.0 (3.8 to 6.3)           | 1.5 (0.1 to 2.9)                               | 26.1 (1.6 to 53.9)                  |
| Iran                                          | 1.8 (1.5 to 2.1)           | 3.4 (2.6 to 4.3)           | 3.7 (2.8 to 4.8)           | 6.3 (3.7 to 10.0)          | 4.0 (2.1 to 5.9)                               | 85.4 (36.5 to 142.9)                |
| Iraq                                          | 1.3 (0.9 to 1.8)           | 1.8 (1.4 to 2.2)           | 1.9 (1.5 to 2.4)           | 2.7 (1.6 to 4.1)           | 2.7 (1.5 to 4.9)                               | 52.1 (7.3 to 108.7)                 |
| Jordan                                        | 5.6 (4.9 to 6.3)           | 7.7 (5.9 to 9.9)           | 8.0 (6.0 to 10.4)          | 11.3 (6.5 to 17.7)         | 2.4 (0.6 to 4.1)                               | 44.4 (9.3 to 84.5)                  |
| Kuwait                                        | 9.2 (6.3 to 13.2)          | 14.7 (10.2 to 20.4)        | 15.3 (10.7 to 21.3)        | 23.2 (13.0 to 37.0)        | 2.9 (0.9 to 4.9)                               | 56.6 (14.6 to 108.5)                |
| Lebanon                                       | 3.8 (2.6 to 5.4)           | 6.5 (4.6 to 8.8)           | 6.8 (4.8 to 9.2)           | 11.1 (6.5 to 17.9)         | 3.5 (1.4 to 5.4)                               | 70.9 (24.3 to 125.7)                |
| Libya                                         | 5.8 (4.1 to 8.2)           | 6.7 (4.8 to 9.2)           | 7.0 (4.8 to 9.6)           | 8.6 (5.1 to 14.2)          | 1.6 (0.0 to 3.4)                               | 27.6 (0.1 to 65.8)                  |
| Morocco                                       | 1.3 (0.9 to 1.8)           | 2.5 (1.7 to 3.5)           | 2.7 (1.9 to 3.7)           | 4.8 (2.7 to 7.8)           | 4.1 (2.1 to 6.2)                               | 88.3 (37.9 to 155.0)                |
| Palestine                                     | 1.3 (0.9 to 1.9)           | 2.3 (1.6 to 3.2)           | 2.5 (1.7 to 3.4)           | 4.1 (2.4 to 6.4)           | 3.8 (1.9 to 5.7)                               | 79.4 (32.0 to 135.9)                |
| Oman                                          | 3.8 (2.6 to 5.4)           | 9.6 (6.5 to 13.7)          | 10.1 (6.9 to 14.5)         | 20.8 (12.1 to 33.5)        | 5.1 (3.4 to 6.7)                               | 115.5 (66.0 to 173.7)               |
| Qatar                                         | 11.9 (8.0 to 16.9)         | 18.2 (12.6 to 25.2)        | 18.7 (12.9 to 26.3)        | 26.8 (15.6 to 44.3)        | 2.4 (0.5 to 4.6)                               | 45.4 (7.2 to 98.0)                  |
| Saudi Arabia                                  | 4.6 (3.1 to 6.3)           | 10.4 (7.0 to 14.5)         | 11.4 (7.7 to 16.0)         | 25.1 (13.8 to 40.7)        | 5.7 (3.7 to 7.4)                               | 138.4 (74.8 to 205.0)               |
| Sudan                                         | 0.7 (0.5 to 1.0)           | 1.4 (1.0 to 2.0)           | 1.6 (1.1 to 2.2)           | 2.9 (1.6 to 4.7)           | 4.5 (2.6 to 6.4)                               | 98.5 (47.1 to 159.6)                |
| Syria                                         | 1.6 (1.1 to 2.2)           | 2.4 (1.6 to 3.3)           | 2.5 (1.8 to 3.6)           | 3.8 (2.2 to 6.1)           | 2.9 (1.1 to 4.8)                               | 56.6 (17.4 to 105.8)                |
| Tunisia                                       | 2.2 (1.6 to 3.1)           | 3.9 (2.7 to 5.5)           | 4.1 (2.8 to 5.8)           | 6.7 (3.7 to 11.3)          | 3.5 (1.6 to 5.5)                               | 70.1 (26.8 to 126.5)                |
| Turkey                                        | 2.2 (1.6 to 3.0)           | 3.1 (2.4 to 3.9)           | 3.3 (2.5 to 4.3)           | 4.9 (3.0 to 7.6)           | 3.0 (0.8 to 5.1)                               | 59.7 (12.4 to 114.5)                |
| United Arab Emirates                          | 11.4 (8.0 to 16.0)         | 18.4 (12.7 to 26.1)        | 18.5 (12.8 to 26.1)        | 27.8 (15.5 to 46.4)        | 2.6 (0.8 to 4.5)                               | 49.7 (13.2 to 95.9)                 |
| Yemen                                         | 0.9 (0.6 to 1.3)           | 1.3 (0.9 to 1.8)           | 1.3 (0.9 to 1.8)           | 1.8 (1.1 to 3.0)           | 1.9 (0.1 to 3.8)                               | 35.0 (1.8 to 76.9)                  |
| <b>South Asia</b>                             |                            |                            |                            |                            |                                                |                                     |
| <b>South Asia</b>                             |                            |                            |                            |                            |                                                |                                     |
| Bangladesh                                    | 0.7 (0.5 to 1.0)           | 1.2 (0.9 to 1.8)           | 1.4 (0.9 to 2.0)           | 2.3 (1.2 to 4.0)           | 3.8 (1.6 to 5.9)                               | 79.8 (26.8 to 143.2)                |
| Bhutan                                        | 1.4 (1.0 to 2.1)           | 2.9 (2.0 to 4.3)           | 3.2 (2.1 to 4.6)           | 6.0 (3.1 to 10.1)          | 4.6 (2.3 to 6.5)                               | 100.9 (41.6 to 165.4)               |
| India                                         | 0.7 (0.6 to 1.0)           | 1.4 (1.0 to 1.8)           | 1.5 (1.1 to 2.0)           | 2.8 (1.5 to 4.7)           | 4.4 (2.1 to 6.5)                               | 95.0 (36.3 to 163.2)                |
| Nepal                                         | 0.7 (0.5 to 1.1)           | 1.4 (1.0 to 2.0)           | 1.5 (1.0 to 2.2)           | 2.8 (1.5 to 4.8)           | 4.2 (1.9 to 6.3)                               | 91.7 (33.5 to 156.7)                |
| Pakistan                                      | 1.0 (0.7 to 1.4)           | 1.6 (1.2 to 2.1)           | 1.7 (1.3 to 2.2)           | 2.8 (1.7 to 4.2)           | 3.4 (1.5 to 5.6)                               | 68.2 (24.6 to 132.4)                |
| <b>Southeast Asia, East Asia, and Oceania</b> |                            |                            |                            |                            |                                                |                                     |
| <b>East Asia</b>                              |                            |                            |                            |                            |                                                |                                     |
| China                                         | 3.4 (2.5 to 4.5)           | 7.8 (6.0 to 10.1)          | 8.3 (6.2 to 10.8)          | 17.5 (10.6 to 25.8)        | 5.2 (3.5 to 7.1)                               | 121.7 (67.9 to 189.1)               |
| North Korea                                   | 1.2 (0.8 to 1.8)           | 1.4 (0.9 to 2.1)           | 1.4 (1.0 to 2.1)           | 1.7 (0.9 to 2.9)           | 1.1 (-1.1 to 3.2)                              | 18.8 (-15.7 to 61.2)                |
| Taiwan (Province of China)                    | 3.5 (2.7 to 4.5)           | 5.3 (4.3 to 6.7)           | 5.5 (4.3 to 7.1)           | 8.1 (5.1 to 12.7)          | 2.7 (0.7 to 4.7)                               | 50.8 (11.7 to 102.0)                |
| <b>Oceania</b>                                |                            |                            |                            |                            |                                                |                                     |
| American Samoa                                | 4.3 (2.9 to 6.1)           | 5.0 (3.3 to 7.0)           | 6.1 (3.3 to 9.8)           | 6.1 (3.3 to 9.8)           | 1.2 (-0.9 to 3.3)                              | 21.1 (-12.0 to 63.1)                |
| Federated States of Micronesia                | 1.2 (0.8 to 1.8)           | 2.1 (1.4 to 3.1)           | 1.9 (1.3 to 2.7)           | 2.6 (1.6 to 4.2)           | 1.3 (0.1 to 2.4)                               | 21.8 (1.5 to 43.6)                  |
| Fiji                                          | 2.8 (2.0 to 4.1)           | 3.5 (2.4 to 5.1)           | 3.6 (2.4 to 5.3)           | 4.6 (2.4 to 7.9)           | 1.6 (-0.5 to 3.6)                              | 29.0 (-7.6 to 71.4)                 |
| Guam                                          | 9.4 (6.4 to 13.6)          | 10.0 (6.7 to 14.2)         | 10.1 (6.6 to 14.4)         | 11.0 (6.0 to 18.5)         | 0.5 (-1.5 to 2.5)                              | 8.7 (-19.9 to 46.5)                 |
| Kiribati                                      | 1.4 (0.9 to 2.0)           | 2.0 (1.3 to 2.9)           | 2.1 (1.4 to 3.1)           | 2.9 (1.7 to 4.7)           | 2.4 (0.7 to 4.2)                               | 44.3 (11.0 to 87.9)                 |
| Marshall Islands                              | 2.3 (1.6 to 3.3)           | 3.6 (2.4 to 5.3)           | 3.6 (2.4 to 5.4)           | 5.3 (3.0 to 8.5)           | 2.4 (1.0 to 3.8)                               | 43.4 (15.5 to 75.9)                 |
| Northern Mariana Islands                      | 7.1 (4.8 to 10.2)          | 7.0 (4.7 to 10.1)          | 7.3 (4.8 to 10.4)          | 8.1 (4.5 to 13.9)          | 0.8 (-1.2 to 3.0)                              | 14.6 (-16.2 to 56.2)                |
| Papua New Guinea                              | 0.8 (0.5 to 1.2)           | 0.9 (0.6 to 1.4)           | 0.9 (0.6 to 1.4)           | 1.2 (0.6 to 2.0)           | 1.3 (-0.7 to 3.5)                              | 23.3 (-9.7 to 68.7)                 |

|                                                                   | Estimate in 2000 (95% UIs) | Estimate in 2015 (95% UIs) | Estimate in 2017 (95% UIs) | Estimate in 2020 (95% UIs) | Annualised rate of change, 2015-2020 (95% UIs) | Percent change, 2015-2020 (95% UIs) |
|-------------------------------------------------------------------|----------------------------|----------------------------|----------------------------|----------------------------|------------------------------------------------|-------------------------------------|
| Samoa                                                             | 1.4 (0.9 to 2.0)           | 1.4 (0.9 to 2.0)           | 1.4 (0.9 to 2.0)           | 1.6 (0.9 to 2.7)           | 1.0 (-0.7 to 2.8)                              | 17.5 (-9.8 to 52.2)                 |
| Solomon Islands                                                   | 0.6 (0.4 to 0.8)           | 0.8 (0.5 to 1.1)           | 0.8 (0.5 to 1.1)           | 1.1 (0.6 to 1.7)           | 2.2 (0.3 to 4.0)                               | 39.9 (4.5 to 83.5)                  |
| Tonga                                                             | 1.6 (1.1 to 2.3)           | 2.0 (1.4 to 3.0)           | 2.2 (1.5 to 3.2)           | 3.0 (1.7 to 4.9)           | 2.4 (0.8 to 4.0)                               | 44.8 (12.0 to 81.1)                 |
| Vanuatu                                                           | 1.0 (0.7 to 1.3)           | 1.5 (1.0 to 2.2)           | 1.6 (1.1 to 2.3)           | 2.1 (1.2 to 3.4)           | 2.1 (0.6 to 3.6)                               | 37.8 (10.2 to 70.5)                 |
| <b>Southeast Asia</b>                                             |                            |                            |                            |                            |                                                |                                     |
| Cambodia                                                          | 1.1 (0.8 to 1.4)           | 2.9 (2.4 to 3.6)           | 3.0 (2.4 to 3.8)           | 6.0 (3.7 to 8.8)           | 4.6 (2.7 to 6.3)                               | 102.6 (50.8 to 158.9)               |
| Indonesia                                                         | 1.6 (1.1 to 2.2)           | 3.1 (2.1 to 4.4)           | 3.3 (2.3 to 4.7)           | 5.8 (3.2 to 9.6)           | 4.0 (2.0 to 6.0)                               | 84.3 (34.7 to 144.3)                |
| Laos                                                              | 0.9 (0.6 to 1.3)           | 1.4 (1.0 to 2.1)           | 1.5 (1.0 to 2.2)           | 2.6 (1.4 to 4.4)           | 3.7 (1.7 to 5.7)                               | 75.8 (29.5 to 135.9)                |
| Malaysia                                                          | 3.4 (2.6 to 4.3)           | 5.9 (3.9 to 8.4)           | 6.3 (4.2 to 9.1)           | 10.6 (5.2 to 18.4)         | 3.6 (1.3 to 5.9)                               | 74.1 (22.1 to 142.8)                |
| Maldives                                                          | 2.2 (1.4 to 3.3)           | 5.0 (3.1 to 7.5)           | 5.5 (3.4 to 8.1)           | 11.2 (5.7 to 19.2)         | 5.2 (3.1 to 7.2)                               | 122.5 (58.5 to 194.5)               |
| Mauritius                                                         | 2.2 (1.4 to 3.1)           | 3.9 (2.6 to 5.5)           | 4.0 (2.7 to 5.9)           | 6.8 (3.6 to 11.6)          | 3.6 (1.4 to 5.8)                               | 73.7 (23.0 to 138.6)                |
| Myanmar                                                           | 0.6 (0.4 to 0.8)           | 2.0 (1.3 to 2.9)           | 2.2 (1.4 to 3.1)           | 5.0 (2.7 to 8.0)           | 6.0 (4.2 to 7.5)                               | 146.7 (87.3 to 207.8)               |
| Philippines                                                       | 2.5 (2.2 to 2.8)           | 1.9 (1.6 to 2.4)           | 2.0 (1.6 to 2.5)           | 2.0 (1.3 to 3.0)           | 0.2 (-1.4 to 1.9)                              | 4.1 (-19.5 to 32.6)                 |
| Sri Lanka                                                         | 1.6 (1.0 to 2.3)           | 2.6 (1.7 to 3.8)           | 2.7 (1.8 to 4.0)           | 4.3 (2.7 to 7.7)           | 3.3 (1.3 to 5.5)                               | 66.3 (20.9 to 129.3)                |
| Seychelles                                                        | 3.3 (2.2 to 4.8)           | 4.5 (2.9 to 6.7)           | 4.8 (3.1 to 7.0)           | 6.8 (3.5 to 12.1)          | 2.5 (0.4 to 4.7)                               | 48.2 (5.6 to 103.6)                 |
| Thailand                                                          | 4.4 (3.1 to 6.0)           | 7.0 (4.8 to 9.8)           | 7.4 (5.0 to 10.3)          | 11.0 (6.0 to 18.5)         | 2.9 (0.9 to 4.8)                               | 55.6 (15.3 to 106.8)                |
| Timor-Leste                                                       | 0.5 (0.3 to 0.7)           | 1.1 (0.7 to 1.5)           | 1.2 (0.8 to 1.6)           | 1.9 (1.1 to 3.0)           | 3.7 (2.1 to 5.3)                               | 76.6 (37.2 to 121.6)                |
| Vietnam                                                           | 0.9 (0.6 to 1.4)           | 2.0 (1.3 to 3.0)           | 2.2 (1.4 to 3.3)           | 4.2 (2.1 to 7.5)           | 4.7 (2.2 to 6.9)                               | 104.4 (39.7 to 181.2)               |
| <b>Sub-Saharan Africa</b>                                         |                            |                            |                            |                            |                                                |                                     |
| <b>Central Sub-Saharan Africa</b>                                 |                            |                            |                            |                            |                                                |                                     |
| Angola                                                            | 0.5 (0.3 to 0.7)           | 0.8 (0.5 to 1.2)           | 0.9 (0.6 to 1.3)           | 1.5 (0.8 to 2.4)           | 3.7 (1.3 to 6.0)                               | 76.6 (22.4 to 144.9)                |
| Central African Republic                                          | 0.4 (0.2 to 0.5)           | 0.4 (0.3 to 0.6)           | 0.4 (0.3 to 0.7)           | 0.6 (0.3 to 1.0)           | 2.1 (0.5 to 3.9)                               | 38.5 (7.6 to 79.2)                  |
| Congo                                                             | 0.8 (0.5 to 1.1)           | 1.4 (1.0 to 2.0)           | 1.5 (1.0 to 2.1)           | 2.6 (1.4 to 4.3)           | 3.8 (1.6 to 5.8)                               | 79.1 (27.4 to 137.1)                |
| Democratic Republic of the Congo                                  | 0.3 (0.2 to 0.4)           | 0.5 (0.3 to 0.7)           | 0.5 (0.3 to 0.8)           | 0.8 (0.4 to 1.3)           | 2.8 (1.0 to 4.8)                               | 53.5 (15.9 to 105.2)                |
| Equatorial Guinea                                                 | 0.7 (0.4 to 1.0)           | 1.8 (1.1 to 2.6)           | 1.9 (1.2 to 2.9)           | 4.5 (2.2 to 7.7)           | 6.0 (3.8 to 8.1)                               | 150.0 (77.6 to 239.5)               |
| Gabon                                                             | 1.2 (0.8 to 1.8)           | 1.8 (1.2 to 2.6)           | 1.9 (1.3 to 2.8)           | 3.0 (1.6 to 5.2)           | 3.3 (1.1 to 5.5)                               | 66.3 (17.5 to 126.6)                |
| <b>Eastern Sub-Saharan Africa</b>                                 |                            |                            |                            |                            |                                                |                                     |
| Burundi                                                           | 0.9 (0.6 to 1.3)           | 1.4 (0.9 to 1.9)           | 1.4 (0.9 to 2.0)           | 2.0 (1.1 to 3.3)           | 2.3 (0.2 to 4.2)                               | 42.1 (3.7 to 88.7)                  |
| Comoros                                                           | 1.5 (0.9 to 2.1)           | 2.4 (1.7 to 3.4)           | 2.6 (1.8 to 3.6)           | 4.1 (2.3 to 6.6)           | 3.3 (1.1 to 5.4)                               | 65.6 (18.8 to 124.2)                |
| Djibouti                                                          | 0.9 (0.6 to 1.3)           | 2.1 (1.5 to 3.0)           | 2.3 (1.6 to 3.2)           | 4.3 (2.4 to 7.0)           | 4.5 (2.4 to 6.5)                               | 100.0 (44.1 to 165.4)               |
| Eritrea                                                           | 1.2 (0.8 to 1.8)           | 1.6 (1.1 to 2.2)           | 1.7 (1.2 to 2.4)           | 2.5 (1.3 to 4.0)           | 3.0 (1.4 to 4.7)                               | 58.2 (23.5 to 102.3)                |
| Ethiopia                                                          | 0.2 (0.1 to 0.3)           | 0.5 (0.3 to 0.7)           | 0.5 (0.3 to 0.8)           | 1.0 (0.5 to 1.7)           | 4.5 (2.5 to 6.3)                               | 98.6 (45.9 to 158.0)                |
| Kenya                                                             | 1.9 (1.2 to 2.6)           | 3.0 (2.0 to 4.3)           | 3.2 (2.2 to 4.6)           | 5.0 (2.7 to 8.4)           | 3.3 (1.2 to 5.5)                               | 66.4 (19.3 to 127.2)                |
| Madagascar                                                        | 1.4 (0.9 to 1.9)           | 1.7 (1.1 to 2.3)           | 1.8 (1.2 to 2.5)           | 2.2 (1.2 to 3.7)           | 1.8 (-0.2 to 3.8)                              | 32.3 (-3.2 to 76.1)                 |
| Malawi                                                            | 0.9 (0.6 to 1.3)           | 1.7 (1.1 to 2.4)           | 1.8 (1.2 to 2.5)           | 3.0 (1.6 to 5.0)           | 3.7 (1.7 to 5.4)                               | 75.7 (28.7 to 125.9)                |
| Mozambique                                                        | 0.4 (0.3 to 0.5)           | 0.8 (0.6 to 1.0)           | 0.8 (0.6 to 1.1)           | 1.6 (0.8 to 2.6)           | 4.7 (2.5 to 6.8)                               | 103.7 (46.4 to 176.8)               |
| Rwanda                                                            | 0.8 (0.6 to 1.0)           | 1.7 (1.4 to 2.2)           | 1.8 (1.5 to 2.2)           | 3.1 (2.1 to 4.4)           | 3.9 (2.2 to 5.7)                               | 82.1 (40.0 to 134.1)                |
| Somalia                                                           | 0.6 (0.4 to 0.8)           | 1.0 (0.6 to 1.4)           | 1.1 (0.7 to 1.5)           | 1.6 (0.8 to 2.8)           | 3.4 (1.5 to 5.3)                               | 69.1 (24.9 to 119.9)                |
| South Sudan                                                       | 0.8 (0.5 to 1.1)           | 1.1 (0.7 to 1.6)           | 1.2 (0.8 to 1.7)           | 1.7 (0.9 to 2.8)           | 2.6 (0.5 to 4.8)                               | 50.5 (8.1 to 105.8)                 |
| Tanzania                                                          | 1.3 (1.0 to 1.5)           | 3.2 (2.6 to 4.0)           | 3.6 (2.8 to 4.6)           | 7.6 (4.8 to 11.3)          | 5.6 (3.9 to 7.3)                               | 133.0 (78.5 to 199.1)               |
| Uganda                                                            | 1.1 (0.9 to 1.2)           | 1.8 (1.4 to 2.2)           | 1.9 (1.4 to 2.4)           | 2.9 (1.4 to 4.7)           | 3.1 (1.4 to 4.7)                               | 60.6 (24.1 to 103.7)                |
| Zambia                                                            | 1.6 (1.3 to 1.8)           | 2.4 (2.0 to 2.9)           | 2.6 (2.0 to 3.2)           | 4.3 (2.6 to 6.3)           | 3.7 (1.9 to 5.3)                               | 75.6 (32.8 to 123.0)                |
| <b>Southern Sub-Saharan Africa</b>                                |                            |                            |                            |                            |                                                |                                     |
| Botswana                                                          | 1.5 (1.0 to 2.1)           | 3.0 (2.0 to 4.3)           | 3.2 (2.1 to 4.5)           | 6.0 (3.0 to 10.1)          | 4.3 (2.0 to 6.4)                               | 93.1 (34.1 to 162.6)                |
| Lesotho                                                           | 0.4 (0.3 to 0.7)           | 0.7 (0.4 to 1.0)           | 0.7 (0.4 to 1.1)           | 1.1 (0.5 to 2.0)           | 3.2 (0.9 to 5.5)                               | 64.9 (13.8 to 128.1)                |
| Namibia                                                           | 1.1 (0.7 to 1.9)           | 1.6 (1.0 to 2.4)           | 1.7 (1.0 to 2.5)           | 2.6 (1.2 to 4.9)           | 3.1 (0.1 to 5.9)                               | 63.1 (2.0 to 143.8)                 |
| South Africa                                                      | 2.6 (2.0 to 3.3)           | 3.0 (2.3 to 3.8)           | 2.9 (2.2 to 3.8)           | 3.5 (2.1 to 5.6)           | 0.9 (-0.9 to 2.9)                              | 15.7 (-13.2 to 54.7)                |
| Swaziland                                                         | 0.7 (0.4 to 1.2)           | 1.0 (0.6 to 1.6)           | 1.1 (0.6 to 1.6)           | 1.6 (0.7 to 2.9)           | 2.6 (0.1 to 5.1)                               | 51.3 (1.3 to 116.0)                 |
| Zimbabwe                                                          | 1.1 (0.6 to 1.7)           | 1.0 (0.6 to 1.5)           | 1.0 (0.6 to 1.6)           | 1.1 (0.6 to 2.0)           | 0.9 (-1.2 to 3.1)                              | 15.9 (-16.5 to 59.7)                |
| <b>Western Sub-Saharan Africa</b>                                 |                            |                            |                            |                            |                                                |                                     |
| Benin                                                             | 0.7 (0.4 to 1.0)           | 0.9 (0.6 to 1.3)           | 0.9 (0.6 to 1.4)           | 1.3 (0.7 to 2.2)           | 2.4 (0.1 to 4.7)                               | 45.3 (0.8 to 103.2)                 |
| Burkina Faso                                                      | 0.7 (0.4 to 1.0)           | 1.1 (0.7 to 1.6)           | 1.1 (0.7 to 1.7)           | 1.7 (0.9 to 2.9)           | 2.8 (0.5 to 5.0)                               | 53.6 (7.5 to 113.1)                 |
| Cameroon                                                          | 1.6 (1.1 to 2.3)           | 2.5 (1.7 to 3.6)           | 2.7 (1.9 to 3.9)           | 4.4 (2.5 to 7.8)           | 3.6 (1.5 to 5.9)                               | 74.8 (24.5 to 141.7)                |
| Cape Verde                                                        | 1.3 (0.8 to 1.9)           | 2.6 (1.7 to 3.9)           | 2.8 (1.8 to 4.0)           | 4.9 (2.5 to 8.1)           | 4.0 (1.8 to 6.0)                               | 85.8 (31.4 to 147.8)                |
| Chad                                                              | 0.6 (0.3 to 0.8)           | 0.7 (0.5 to 1.1)           | 0.8 (0.5 to 1.2)           | 1.1 (0.5 to 1.9)           | 2.4 (0.1 to 4.7)                               | 44.7 (2.0 to 102.1)                 |
| Cote d'Ivoire                                                     | 1.2 (0.8 to 1.7)           | 1.5 (1.0 to 2.1)           | 1.6 (1.1 to 2.4)           | 2.3 (1.2 to 3.9)           | 2.5 (0.3 to 4.6)                               | 46.9 (5.2 to 100.0)                 |
| The Gambia                                                        | 1.0 (0.7 to 1.4)           | 1.3 (0.8 to 1.9)           | 1.4 (0.9 to 1.9)           | 1.7 (0.9 to 2.9)           | 1.8 (-0.3 to 4.0)                              | 33.2 (-4.1 to 81.0)                 |
| Ghana                                                             | 1.7 (1.2 to 2.3)           | 3.0 (2.3 to 3.9)           | 3.0 (2.2 to 4.0)           | 4.5 (2.6 to 7.1)           | 2.5 (0.5 to 4.4)                               | 47.3 (8.0 to 92.8)                  |
| Guinea                                                            | 0.5 (0.4 to 0.7)           | 0.8 (0.6 to 1.1)           | 0.8 (0.6 to 1.1)           | 1.3 (0.7 to 2.1)           | 2.7 (0.8 to 4.5)                               | 50.9 (13.0 to 95.7)                 |
| Guinea-Bissau                                                     | 0.8 (0.5 to 1.2)           | 1.2 (0.8 to 1.8)           | 1.2 (0.8 to 1.8)           | 1.9 (1.0 to 3.0)           | 3.0 (1.2 to 4.6)                               | 57.2 (18.9 to 100.5)                |
| Liberia                                                           | 0.7 (0.5 to 1.0)           | 1.7 (1.0 to 2.7)           | 1.5 (1.0 to 2.3)           | 2.7 (1.4 to 4.5)           | 3.0 (1.3 to 4.6)                               | 58.5 (22.0 to 98.3)                 |
| Mali                                                              | 0.6 (0.4 to 0.9)           | 0.8 (0.5 to 1.2)           | 0.9 (0.5 to 1.3)           | 1.2 (0.6 to 2.1)           | 2.3 (0.1 to 4.7)                               | 44.4 (0.8 to 103.6)                 |
| Mauritania                                                        | 1.1 (0.7 to 1.6)           | 1.3 (0.9 to 1.9)           | 1.4 (0.9 to 2.0)           | 1.9 (1.0 to 3.3)           | 2.3 (0.3 to 4.3)                               | 42.5 (4.1 to 90.8)                  |
| Niger                                                             | 0.5 (0.3 to 0.8)           | 0.6 (0.4 to 0.9)           | 0.6 (0.4 to 1.0)           | 0.8 (0.4 to 1.4)           | 1.5 (-0.8 to 3.9)                              | 27.0 (-11.1 to 80.6)                |
| Nigeria                                                           | 1.2 (0.9 to 1.6)           | 2.0 (1.6 to 2.4)           | 2.1 (1.6 to 2.6)           | 3.0 (1.8 to 4.6)           | 2.4 (0.5 to 4.5)                               | 45.4 (7.7 to 95.6)                  |
| Sao Tome and Principe                                             | 1.1 (0.7 to 1.7)           | 1.9 (1.2 to 2.6)           | 2.0 (1.3 to 2.9)           | 3.3 (1.9 to 5.4)           | 3.7 (1.8 to 5.4)                               | 74.8 (31.6 to 123.6)                |
| Senegal                                                           | 1.1 (0.9 to 1.3)           | 1.2 (0.8 to 1.7)           | 1.2 (0.8 to 1.8)           | 1.5 (0.8 to 2.6)           | 1.3 (-0.9 to 3.3)                              | 22.5 (-12.3 to 63.4)                |
| Sierra Leone                                                      | 1.5 (1.0 to 2.1)           | 2.8 (2.1 to 3.6)           | 2.8 (2.1 to 3.6)           | 4.5 (2.9 to 6.7)           | 3.1 (1.2 to 4.9)                               | 60.2 (20.4 to 107.8)                |
| Togo                                                              | 0.9 (0.6 to 1.4)           | 1.4 (0.9 to 2.1)           | 1.5 (1.0 to 2.3)           | 2.4 (1.3 to 4.1)           | 3.3 (1.2 to 5.4)                               | 65.8 (19.0 to 124.5)                |
| <b>Indicator 3.c.1b: Nurses and midwives per 1,000 population</b> |                            |                            |                            |                            |                                                |                                     |
| <b>Central Europe, Eastern Europe, and Central Asia</b>           |                            |                            |                            |                            |                                                |                                     |
| <b>Central Asia</b>                                               |                            |                            |                            |                            |                                                |                                     |
| Armenia                                                           | 3.3 (2.3 to 4.6)           | 7.0 (5.3 to 9.2)           | 7.3 (5.3 to 9.9)           | 12.9 (7.1 to 21.5)         | 3.8 (1.6 to 6.1)                               | 80.8 (28.0 to 150.7)                |
| Azerbaijan                                                        | 3.2 (1.9 to 4.7)           | 6.7 (3.9 to 10.1)          | 6.9 (4.1 to 10.6)          | 10.9 (5.2 to 20.0)         | 3.1 (0.9 to 5.1)                               | 61.1 (14.0 to 115.9)                |
| Georgia                                                           | 2.2 (1.4 to 3.4)           | 3.5 (2.3 to 5.1)           | 3.7 (2.4 to 5.4)           | 5.3 (2.7 to 9.1)           | 2.5 (0.1 to 4.9)                               | 49.2 (0.8 to 109.4)                 |
| Kazakhstan                                                        | 4.3 (2.6 to 6.4)           | 7.0 (4.2 to 10.9)          | 7.3 (4.3 to 11.5)          | 10.7 (4.7 to 20.6)         | 2.6 (0.1 to 5.0)                               | 49.6 (1.0 to 112.3)                 |
| Kyrgyzstan                                                        | 2.3 (1.4 to 3.5)           | 3.2 (2.0 to 4.8)           | 3.2 (2.1 to 4.9)           | 4.1 (2.1 to 7.3)           | 1.6 (-0.7 to 3.8)                              | 28.6 (-10.4 to 76.1)                |
| Mongolia                                                          | 3.6 (2.7 to 4.5)           | 7.0 (4.7 to 10.3)          | 7.3 (4.9 to 10.8)          | 12.7 (6.3 to 23.7)         | 3.8 (1.6 to 6.0)                               | 78.1 (26.2 to 145.1)                |
| Tajikistan                                                        | 2.2 (1.5 to 3.0)           | 4.5 (3.1 to 6.2)           | 4.8 (3.2 to 6.7)           | 8.8 (4.2 to 14.4)          | 3.8 (1.4 to 6.3)                               | 80.6 (22.9 to 156.1)                |
| Turkmenistan                                                      | 3.1 (1.9 to 4.7)           | 5.1 (3.0 to 8.0)           | 5.4 (3.2 to 8.4)           | 8.2 (3.7 to 16.0)          | 2.9 (0.4 to 5.3)                               | 57.6 (7.0 to 120.5)                 |

|                                    | Estimate in 2000 (95% UIs) | Estimate in 2015 (95% UIs) | Estimate in 2017 (95% UIs) | Estimate in 2030 (95% UIs) | Annualised rate of change, 2015-2030 (95% UIs) | Percent change, 2015-2030 (95% UIs) |
|------------------------------------|----------------------------|----------------------------|----------------------------|----------------------------|------------------------------------------------|-------------------------------------|
| Uzbekistan                         | 2.0 (1.2 to 3.1)           | 3.8 (2.5 to 5.8)           | 4.0 (2.5 to 6.1)           | 6.8 (3.3 to 12.6)          | 3.7 (1.3 to 6.2)                               | 77.8 (20.7 to 154.7)                |
| <b>Central Europe</b>              |                            |                            |                            |                            |                                                |                                     |
| Albania                            | 3.7 (3.0 to 4.6)           | 5.6 (4.6 to 6.7)           | 5.8 (4.5 to 7.1)           | 8.2 (5.1 to 12.2)          | 2.5 (0.6 to 4.2)                               | 46.1 (9.5 to 87.9)                  |
| Bosnia and Herzegovina             | 2.0 (1.2 to 3.1)           | 2.9 (1.8 to 4.1)           | 3.1 (1.9 to 4.7)           | 4.6 (2.2 to 8.5)           | 2.8 (0.4 to 5.2)                               | 55.5 (6.4 to 119.4)                 |
| Bulgaria                           | 5.2 (3.9 to 6.6)           | 7.7 (5.2 to 10.4)          | 7.9 (5.3 to 11.1)          | 10.8 (5.5 to 18.8)         | 2.1 (-0.2 to 4.4)                              | 38.2 (-3.1 to 93.8)                 |
| Croatia                            | 6.3 (5.2 to 7.5)           | 8.6 (7.7 to 9.7)           | 8.8 (7.6 to 10.1)          | 11.2 (8.2 to 14.9)         | 1.7 (0.3 to 3.0)                               | 29.9 (4.3 to 57.4)                  |
| Czech Republic                     | 10.7 (9.5 to 11.9)         | 12.9 (11.4 to 14.6)        | 13.2 (11.2 to 15.4)        | 15.6 (11.5 to 20.9)        | 1.2 (-0.2 to 2.5)                              | 19.9 (-2.3 to 45.4)                 |
| Hungary                            | 5.9 (5.4 to 6.4)           | 5.0 (4.3 to 5.7)           | 5.0 (4.1 to 5.9)           | 4.5 (3.3 to 5.9)           | -0.7 (-2.0 to 0.6)                             | -9.7 (-25.9 to 9.3)                 |
| Macedonia                          | 2.4 (1.5 to 3.6)           | 4.2 (2.6 to 6.3)           | 4.4 (2.7 to 6.6)           | 6.7 (3.4 to 11.8)          | 2.9 (0.7 to 5.3)                               | 56.9 (11.2 to 120.6)                |
| Montenegro                         | 3.4 (2.1 to 5.0)           | 4.5 (2.9 to 6.6)           | 4.7 (3.1 to 6.9)           | 6.7 (3.1 to 10.6)          | 1.9 (-0.5 to 4.1)                              | 34.0 (-7.4 to 85.8)                 |
| Poland                             | 5.1 (4.0 to 6.4)           | 6.5 (4.7 to 8.6)           | 6.6 (4.7 to 8.9)           | 8.2 (4.5 to 13.6)          | 1.4 (-0.8 to 3.4)                              | 24.7 (-10.7 to 66.7)                |
| Romania                            | 2.6 (2.0 to 3.4)           | 4.2 (3.7 to 4.7)           | 4.3 (3.6 to 5.0)           | 6.0 (4.1 to 8.5)           | 2.4 (0.5 to 4.2)                               | 44.2 (7.1 to 88.0)                  |
| Serbia                             | 2.5 (1.8 to 3.5)           | 3.8 (2.5 to 5.4)           | 3.9 (2.6 to 5.7)           | 5.4 (2.7 to 9.5)           | 2.2 (0.0 to 4.4)                               | 41.4 (0.1 to 93.6)                  |
| Slovakia                           | 8.8 (7.9 to 9.8)           | 10.6 (9.3 to 12.0)         | 10.9 (9.3 to 12.8)         | 13.4 (9.7 to 18.0)         | 1.5 (0.1 to 2.9)                               | 25.4 (2.1 to 53.4)                  |
| Slovenia                           | 6.7 (5.2 to 8.3)           | 9.2 (7.2 to 11.5)          | 9.3 (7.2 to 11.9)          | 12.2 (7.7 to 18.6)         | 1.8 (0.0 to 3.6)                               | 32.0 (0.5 to 72.0)                  |
| <b>Eastern Europe</b>              |                            |                            |                            |                            |                                                |                                     |
| Belarus                            | 5.5 (3.8 to 7.5)           | 10.4 (7.6 to 13.8)         | 10.5 (7.4 to 14.4)         | 16.7 (9.0 to 29.2)         | 2.9 (0.6 to 5.4)                               | 57.4 (9.8 to 124.0)                 |
| Estonia                            | 6.3 (5.5 to 7.2)           | 6.2 (5.2 to 7.4)           | 6.2 (4.9 to 7.6)           | 6.1 (4.0 to 9.2)           | -0.2 (-1.9 to 1.6)                             | -2.2 (-24.4 to 26.4)                |
| Latvia                             | 7.2 (6.3 to 8.0)           | 6.5 (5.5 to 7.6)           | 6.5 (5.3 to 7.7)           | 6.0 (4.2 to 8.3)           | -0.7 (-2.0 to 0.8)                             | -8.9 (-26.3 to 12.2)                |
| Lithuania                          | 5.8 (5.0 to 6.7)           | 7.0 (5.9 to 8.1)           | 7.1 (5.9 to 8.6)           | 8.7 (6.1 to 12.1)          | 1.4 (-0.1 to 2.9)                              | 24.4 (-0.9 to 55.4)                 |
| Moldova                            | 1.3 (0.8 to 1.9)           | 2.4 (1.5 to 3.6)           | 2.5 (1.6 to 3.7)           | 3.5 (1.8 to 6.5)           | 2.7 (0.4 to 5.0)                               | 52.0 (6.4 to 111.7)                 |
| Russia                             | 6.3 (5.0 to 7.6)           | 8.7 (6.6 to 11.2)          | 8.6 (6.3 to 11.2)          | 10.6 (6.1 to 16.8)         | 1.2 (-0.8 to 3.1)                              | 20.5 (-10.8 to 59.7)                |
| Ukraine                            | 6.6 (4.6 to 9.1)           | 9.8 (7.0 to 13.4)          | 10.0 (7.0 to 14.0)         | 13.2 (6.8 to 22.3)         | 1.7 (-0.9 to 4.0)                              | 31.8 (-13.0 to 83.1)                |
| <b>High-income</b>                 |                            |                            |                            |                            |                                                |                                     |
| <b>Australasia</b>                 |                            |                            |                            |                            |                                                |                                     |
| Australia                          | 15.5 (12.7 to 18.4)        | 12.6 (9.4 to 16.4)         | 12.8 (9.3 to 17.0)         | 12.0 (7.1 to 19.4)         | -0.5 (-2.1 to 1.4)                             | -6.1 (-27.4 to 23.6)                |
| New Zealand                        | 12.8 (10.3 to 15.5)        | 19.0 (14.3 to 25.0)        | 19.6 (14.5 to 26.0)        | 26.2 (15.5 to 41.8)        | 2.0 (0.2 to 3.8)                               | 36.2 (3.4 to 78.1)                  |
| <b>High-income Asia Pacific</b>    |                            |                            |                            |                            |                                                |                                     |
| Brunei                             | 5.3 (3.4 to 7.8)           | 7.4 (4.7 to 11.1)          | 7.8 (4.9 to 11.5)          | 10.7 (5.3 to 19.2)         | 2.2 (-0.0 to 4.5)                              | 41.9 (-0.7 to 97.8)                 |
| Japan                              | 9.5 (7.1 to 12.5)          | 11.2 (8.6 to 14.2)         | 11.3 (8.4 to 14.6)         | 13.4 (8.1 to 20.6)         | 1.0 (-1.0 to 3.1)                              | 17.5 (-13.8 to 59.2)                |
| South Korea                        | 3.3 (2.5 to 4.3)           | 6.5 (5.1 to 8.2)           | 6.8 (5.2 to 8.9)           | 11.9 (7.0 to 18.8)         | 3.9 (1.6 to 6.0)                               | 81.0 (27.4 to 144.1)                |
| Singapore                          | 5.4 (3.5 to 8.0)           | 9.8 (6.4 to 14.0)          | 10.0 (6.5 to 14.7)         | 15.9 (8.1 to 27.9)         | 3.1 (0.8 to 5.2)                               | 60.9 (12.4 to 119.1)                |
| <b>High-income North America</b>   |                            |                            |                            |                            |                                                |                                     |
| Canada                             | 12.7 (10.1 to 15.8)        | 15.8 (11.2 to 21.0)        | 16.4 (11.6 to 22.4)        | 20.5 (11.2 to 34.7)        | 1.5 (-0.4 to 3.7)                              | 27.7 (-5.9 to 73.1)                 |
| Greenland                          | 5.0 (3.1 to 7.6)           | 6.5 (4.0 to 10.1)          | 6.7 (4.0 to 10.1)          | 8.5 (4.1 to 15.8)          | 1.5 (-0.9 to 4.0)                              | 28.2 (-12.7 to 82.7)                |
| United States                      | 9.9 (8.1 to 12.1)          | 10.2 (8.2 to 12.5)         | 10.0 (7.9 to 12.6)         | 10.3 (6.5 to 15.8)         | -0.1 (-1.8 to 1.7)                             | 0.1 (-24.0 to 29.8)                 |
| <b>Southern Latin America</b>      |                            |                            |                            |                            |                                                |                                     |
| Argentina                          | 1.9 (1.1 to 2.8)           | 2.5 (1.6 to 3.6)           | 2.5 (1.5 to 3.8)           | 3.2 (1.4 to 5.9)           | 1.5 (-1.5 to 4.1)                              | 28.1 (-20.3 to 84.4)                |
| Chile                              | 2.2 (1.8 to 2.7)           | 4.9 (4.1 to 5.9)           | 5.2 (4.2 to 6.4)           | 9.9 (6.7 to 14.3)          | 4.6 (3.0 to 6.2)                               | 100.8 (57.7 to 153.4)               |
| Uruguay                            | 3.1 (2.4 to 3.9)           | 5.3 (3.9 to 6.9)           | 5.6 (4.0 to 7.5)           | 8.9 (5.1 to 14.4)          | 3.3 (1.3 to 5.3)                               | 66.1 (22.3 to 121.5)                |
| <b>Western Europe</b>              |                            |                            |                            |                            |                                                |                                     |
| Andorra                            | 11.1 (6.5 to 17.0)         | 12.6 (7.3 to 19.4)         | 12.8 (7.5 to 20.0)         | 14.8 (6.7 to 28.3)         | 0.8 (-1.9 to 3.2)                              | 15.4 (-24.6 to 62.4)                |
| Austria                            | 9.5 (8.4 to 10.7)          | 10.2 (8.4 to 12.1)         | 10.4 (8.3 to 12.8)         | 11.8 (7.6 to 16.9)         | 0.8 (-0.9 to 2.4)                              | 14.0 (-12.1 to 43.1)                |
| Belgium                            | 13.0 (11.9 to 14.1)        | 13.5 (11.9 to 15.2)        | 13.3 (11.4 to 15.4)        | 13.7 (10.3 to 17.7)        | 0.0 (-1.1 to 1.1)                              | 0.6 (-15.2 to 18.7)                 |
| Cyprus                             | 4.2 (3.5 to 4.9)           | 5.5 (4.7 to 6.6)           | 5.8 (4.8 to 7.2)           | 7.6 (5.2 to 11.3)          | 2.0 (0.4 to 3.7)                               | 36.4 (6.4 to 74.7)                  |
| Denmark                            | 10.6 (9.2 to 12.2)         | 10.2 (8.0 to 12.6)         | 10.0 (7.5 to 12.9)         | 9.8 (5.8 to 15.5)          | -0.4 (-2.3 to 1.4)                             | -5.4 (-29.1 to 22.6)                |
| Finland                            | 16.8 (15.2 to 18.5)        | 13.7 (11.9 to 15.6)        | 13.7 (11.4 to 16.1)        | 12.2 (8.7 to 16.7)         | -0.9 (-2.3 to 0.5)                             | -11.6 (-29.5 to 8.5)                |
| France                             | 9.2 (8.3 to 10.1)          | 8.9 (7.7 to 10.2)          | 8.5 (7.0 to 10.2)          | 7.9 (5.8 to 10.2)          | -0.9 (-2.1 to 0.6)                             | -11.6 (-27.1 to 9.2)                |
| Germany                            | 10.2 (9.4 to 11.0)         | 17.6 (16.0 to 19.2)        | 18.4 (16.3 to 20.9)        | 28.0 (22.0 to 35.1)        | 3.1 (1.9 to 4.1)                               | 58.8 (33.7 to 85.8)                 |
| Greece                             | 3.4 (3.1 to 3.8)           | 4.8 (4.3 to 5.4)           | 4.8 (4.1 to 5.5)           | 6.1 (4.5 to 8.0)           | 1.5 (0.2 to 2.8)                               | 26.5 (3.8 to 51.8)                  |
| Iceland                            | 15.2 (13.3 to 17.2)        | 14.8 (12.8 to 17.0)        | 15.0 (12.4 to 17.7)        | 15.1 (10.6 to 20.5)        | 0.1 (-1.5 to 1.4)                              | 1.4 (-19.7 to 24.2)                 |
| Ireland                            | 10.7 (9.5 to 11.9)         | 13.6 (11.8 to 15.6)        | 13.6 (11.9 to 16.3)        | 16.7 (11.9 to 22.8)        | 1.3 (-0.1 to 2.7)                              | 22.1 (-2.1 to 48.9)                 |
| Israel                             | 5.3 (4.2 to 7.0)           | 6.4 (4.8 to 8.3)           | 6.5 (4.8 to 8.6)           | 7.6 (4.3 to 12.2)          | 1.0 (-1.2 to 3.0)                              | 17.4 (-18.0 to 56.4)                |
| Italy                              | 5.7 (4.9 to 6.4)           | 7.2 (6.1 to 8.3)           | 7.3 (6.1 to 8.8)           | 9.2 (6.4 to 13.1)          | 1.6 (0.0 to 3.1)                               | 27.6 (0.5 to 59.5)                  |
| Luxembourg                         | 6.8 (5.9 to 7.7)           | 8.9 (7.5 to 10.5)          | 8.8 (7.0 to 10.8)          | 10.7 (7.2 to 15.2)         | 1.1 (-0.5 to 2.7)                              | 19.5 (-7.6 to 49.7)                 |
| Malta                              | 4.9 (3.0 to 7.5)           | 7.2 (4.3 to 11.1)          | 7.5 (4.4 to 11.6)          | 10.6 (5.0 to 19.6)         | 2.3 (-0.2 to 4.6)                              | 43.3 (-2.9 to 100.7)                |
| Netherlands                        | 20.4 (18.3 to 22.9)        | 21.9 (18.7 to 25.7)        | 21.8 (17.9 to 26.2)        | 23.4 (16.9 to 32.5)        | 0.4 (-1.0 to 1.7)                              | 6.2 (-13.6 to 30.0)                 |
| Norway                             | 15.9 (14.2 to 17.8)        | 22.2 (18.7 to 26.1)        | 22.6 (18.3 to 27.4)        | 29.2 (19.4 to 41.6)        | 1.7 (0.1 to 3.3)                               | 30.5 (1.9 to 63.4)                  |
| Portugal                           | 4.6 (4.0 to 5.3)           | 7.1 (6.0 to 8.4)           | 7.5 (6.1 to 9.2)           | 11.0 (7.5 to 15.6)         | 2.8 (1.2 to 4.4)                               | 53.5 (19.6 to 92.6)                 |
| Spain                              | 6.4 (5.7 to 7.2)           | 9.3 (8.1 to 10.7)          | 9.2 (7.7 to 11.1)          | 12.2 (8.6 to 16.9)         | 1.7 (0.3 to 3.2)                               | 30.8 (4.9 to 62.2)                  |
| Sweden                             | 9.7 (8.6 to 10.9)          | 14.2 (12.1 to 16.7)        | 14.7 (11.9 to 18.0)        | 18.7 (12.6 to 27.2)        | 1.7 (0.1 to 3.4)                               | 30.3 (1.7 to 65.8)                  |
| Switzerland                        | 15.9 (14.7 to 17.3)        | 15.2 (13.5 to 17.1)        | 14.9 (12.8 to 17.3)        | 14.7 (10.9 to 19.0)        | -0.3 (-1.5 to 1.0)                             | -3.8 (-20.4 to 16.4)                |
| United Kingdom                     | 13.8 (12.8 to 14.8)        | 15.3 (13.5 to 17.2)        | 15.3 (12.9 to 17.8)        | 16.8 (12.2 to 22.0)        | 0.5 (-0.7 to 1.8)                              | 8.9 (-10.3 to 30.1)                 |
| <b>Latin America and Caribbean</b> |                            |                            |                            |                            |                                                |                                     |
| <b>Andean Latin America</b>        |                            |                            |                            |                            |                                                |                                     |
| Bolivia                            | 2.1 (1.7 to 2.6)           | 3.8 (2.6 to 5.4)           | 4.0 (2.7 to 5.7)           | 6.8 (3.3 to 11.8)          | 3.6 (1.2 to 5.7)                               | 74.0 (20.5 to 136.7)                |
| Ecuador                            | 1.2 (0.9 to 1.5)           | 2.5 (1.7 to 3.3)           | 2.5 (1.7 to 3.5)           | 4.1 (2.1 to 7.1)           | 3.2 (0.9 to 5.6)                               | 64.7 (13.6 to 130.7)                |
| Peru                               | 2.0 (1.2 to 3.3)           | 2.8 (1.7 to 4.4)           | 2.9 (1.7 to 4.5)           | 3.9 (1.8 to 7.7)           | 1.9 (-0.7 to 4.6)                              | 36.0 (-10.4 to 98.6)                |
| <b>Caribbean</b>                   |                            |                            |                            |                            |                                                |                                     |
| Antigua and Barbuda                | 4.9 (2.9 to 7.4)           | 6.6 (4.0 to 10.2)          | 6.9 (4.2 to 10.6)          | 9.4 (4.5 to 17.0)          | 2.1 (-0.3 to 4.5)                              | 40.0 (-4.5 to 95.6)                 |
| The Bahamas                        | 9.8 (6.0 to 14.6)          | 13.8 (8.5 to 20.8)         | 14.1 (8.8 to 21.0)         | 20.0 (9.7 to 34.9)         | 2.3 (-0.1 to 4.7)                              | 43.1 (-1.0 to 102.4)                |
| Barbados                           | 6.6 (4.1 to 9.7)           | 8.3 (5.0 to 12.5)          | 8.5 (5.1 to 12.7)          | 10.7 (5.0 to 19.6)         | 1.5 (-0.9 to 4.0)                              | 27.1 (-2.3 to 81.7)                 |
| Belize                             | 1.9 (1.2 to 2.8)           | 3.3 (2.1 to 5.0)           | 3.5 (2.1 to 5.2)           | 5.7 (2.7 to 10.1)          | 3.4 (1.0 to 5.7)                               | 68.4 (15.8 to 135.7)                |
| Bermuda                            | 13.4 (8.1 to 19.9)         | 21.1 (12.6 to 32.2)        | 20.9 (12.5 to 32.2)        | 28.5 (13.3 to 50.9)        | 1.8 (-0.5 to 4.0)                              | 33.2 (-7.1 to 82.3)                 |
| Cuba                               | 7.2 (5.9 to 8.7)           | 14.0 (9.5 to 19.2)         | 14.6 (9.7 to 20.1)         | 23.4 (11.8 to 39.8)        | 3.2 (1.1 to 5.2)                               | 63.7 (17.3 to 117.5)                |
| Dominica                           | 2.8 (1.7 to 4.1)           | 4.1 (2.5 to 6.3)           | 4.3 (2.6 to 6.5)           | 6.1 (3.0 to 11.1)          | 2.5 (0.2 to 4.7)                               | 47.5 (3.4 to 103.0)                 |
| Dominican Republic                 | 3.5 (2.5 to 4.6)           | 4.2 (2.7 to 6.4)           | 4.3 (2.7 to 6.6)           | 5.5 (2.3 to 11.4)          | 1.4 (-1.4 to 4.2)                              | 26.6 (-18.5 to 88.0)                |
| Grenada                            | 3.0 (1.8 to 4.5)           | 4.0 (2.4 to 6.2)           | 4.1 (2.4 to 6.3)           | 5.5 (2.5 to 9.8)           | 1.9 (-0.6 to 4.2)                              | 35.4 (-8.8 to 86.7)                 |
| Guyana                             | 1.8 (1.2 to 2.7)           | 2.9 (1.8 to 4.5)           | 3.1 (1.9 to 4.7)           | 4.5 (2.1 to 8.4)           | 2.6 (0.3 to 5.2)                               | 50.9 (4.7 to 116.9)                 |
| Haiti                              | 0.8 (0.5 to 1.3)           | 1.4 (0.8 to 2.1)           | 1.4 (0.9 to 2.2)           | 2.0 (1.0 to 3.8)           | 2.5 (0.1 to 4.9)                               | 48.3 (2.2 to 107.9)                 |

|                                               | Estimate in 2000 (95% UIs) | Estimate in 2015 (95% UIs) | Estimate in 2017 (95% UIs) | Estimate in 2030 (95% UIs) | Annualised rate of change, 2015-2030 (95% UIs) | Percent change, 2015-2030 (95% UIs) |
|-----------------------------------------------|----------------------------|----------------------------|----------------------------|----------------------------|------------------------------------------------|-------------------------------------|
| Jamaica                                       | 3.5 (2.1 to 5.5)           | 4.7 (2.9 to 7.4)           | 4.9 (2.9 to 7.7)           | 6.6 (3.2 to 12.3)          | 2.0 (-0.4 to 4.3)                              | 37.2 (-6.1 to 90.2)                 |
| Puerto Rico                                   | 6.7 (4.0 to 10.6)          | 9.2 (5.6 to 13.8)          | 9.2 (5.6 to 14.1)          | 12.2 (5.8 to 23.0)         | 1.7 (-0.6 to 4.2)                              | 32.1 (-9.0 to 89.1)                 |
| Saint Lucia                                   | 3.3 (2.0 to 5.1)           | 5.2 (3.1 to 7.8)           | 5.4 (3.3 to 8.1)           | 8.0 (3.7 to 14.2)          | 2.7 (0.5 to 5.0)                               | 52.3 (7.2 to 112.5)                 |
| Saint Vincent and the Grenadines              | 2.5 (1.6 to 3.8)           | 3.9 (2.4 to 6.3)           | 4.0 (2.4 to 6.3)           | 5.9 (2.7 to 11.1)          | 2.5 (0.0 to 4.9)                               | 47.6 (0.7 to 109.9)                 |
| Suriname                                      | 4.5 (2.8 to 6.5)           | 5.7 (3.7 to 7.9)           | 5.5 (3.7 to 7.8)           | 6.5 (3.5 to 10.7)          | 0.7 (-1.5 to 3.0)                              | 12.2 (-19.6 to 56.3)                |
| Trinidad and Tobago                           | 3.4 (2.5 to 4.5)           | 5.1 (3.2 to 7.9)           | 5.2 (3.2 to 7.9)           | 7.1 (3.3 to 13.6)          | 1.9 (-0.5 to 4.2)                              | 35.5 (-7.1 to 86.4)                 |
| Virgin Islands, U.S.                          | 8.6 (5.0 to 12.6)          | 11.3 (6.5 to 17.6)         | 11.4 (6.5 to 17.9)         | 14.2 (6.2 to 27.6)         | 1.3 (-1.1 to 3.8)                              | 23.2 (-15.5 to 76.3)                |
| <b>Central Latin America</b>                  |                            |                            |                            |                            |                                                |                                     |
| Colombia                                      | 1.8 (1.1 to 2.7)           | 2.8 (1.7 to 4.2)           | 2.9 (1.8 to 4.4)           | 4.3 (1.9 to 7.8)           | 2.7 (0.2 to 5.1)                               | 52.2 (2.5 to 114.6)                 |
| Costa Rica                                    | 0.8 (0.5 to 1.3)           | 1.1 (0.6 to 1.8)           | 1.1 (0.6 to 1.9)           | 1.6 (0.6 to 3.2)           | 1.9 (-0.9 to 4.7)                              | 37.1 (-13.2 to 102.3)               |
| El Salvador                                   | 1.3 (0.9 to 1.7)           | 2.2 (1.6 to 3.0)           | 2.4 (1.7 to 3.2)           | 4.0 (2.3 to 6.6)           | 3.7 (1.6 to 5.9)                               | 76.2 (27.0 to 143.4)                |
| Guatemala                                     | 10.0 (6 to 16)             | 18 (11 to 26)              | 18 (11 to 27)              | 29 (14 to 54)              | 3.1 (0.6 to 5.7)                               | 61.4 (9.3 to 124.6)                 |
| Honduras                                      | 1.1 (0.7 to 1.7)           | 2.0 (1.3 to 3.2)           | 2.1 (1.3 to 3.2)           | 3.5 (1.7 to 6.2)           | 3.4 (1.1 to 5.6)                               | 70.3 (17.3 to 131.9)                |
| Mexico                                        | 3.3 (2.5 to 4.2)           | 5.2 (3.9 to 6.6)           | 5.3 (3.8 to 6.9)           | 7.7 (4.3 to 12.7)          | 2.5 (0.3 to 4.6)                               | 47.7 (4.7 to 100.4)                 |
| Nicaragua                                     | 0.3 (0.2 to 0.5)           | 0.6 (0.3 to 1.0)           | 0.6 (0.4 to 1.1)           | 1.1 (0.4 to 2.1)           | 3.4 (0.6 to 6.1)                               | 70.6 (9.4 to 149.1)                 |
| Panama                                        | 2.9 (2.2 to 3.7)           | 4.3 (2.8 to 6.1)           | 4.5 (2.9 to 6.6)           | 6.6 (3.2 to 11.8)          | 2.7 (0.5 to 4.8)                               | 51.7 (7.1 to 106.9)                 |
| Venezuela                                     | 3.0 (2.3 to 3.8)           | 3.8 (2.6 to 5.3)           | 3.6 (2.4 to 5.2)           | 4.3 (2.1 to 8.7)           | 0.6 (-1.5 to 2.7)                              | 11.1 (-19.9 to 50.9)                |
| <b>Tropical Latin America</b>                 |                            |                            |                            |                            |                                                |                                     |
| Brazil                                        | 3.3 (2.4 to 4.4)           | 5.6 (4.5 to 6.8)           | 5.8 (4.4 to 7.3)           | 9.2 (5.3 to 14.4)          | 3.1 (0.8 to 5.2)                               | 60.9 (13.0 to 117.2)                |
| Paraguay                                      | 1.7 (1.3 to 2.1)           | 2.3 (1.6 to 3.1)           | 2.4 (1.7 to 3.4)           | 3.5 (1.8 to 5.8)           | 2.5 (0.2 to 4.5)                               | 47.4 (3.7 to 97.0)                  |
| <b>North Africa and Middle East</b>           |                            |                            |                            |                            |                                                |                                     |
| <b>North Africa and Middle East</b>           |                            |                            |                            |                            |                                                |                                     |
| Alghanistan                                   | 0.3 (0.2 to 0.4)           | 0.4 (0.2 to 0.6)           | 0.4 (0.3 to 0.7)           | 0.6 (0.3 to 1.1)           | 2.4 (0.1 to 4.9)                               | 45.7 (1.5 to 108.3)                 |
| Algeria                                       | 1.3 (0.8 to 2.0)           | 2.9 (1.8 to 4.4)           | 3.1 (1.9 to 4.7)           | 5.9 (2.7 to 10.4)          | 4.6 (1.9 to 7.0)                               | 102.1 (33.8 to 184.0)               |
| Bahrain                                       | 4.8 (2.9 to 7.3)           | 8.1 (5.0 to 12.1)          | 8.3 (5.2 to 12.4)          | 12.6 (6.3 to 22.6)         | 2.8 (0.4 to 5.0)                               | 54.3 (6.2 to 112.9)                 |
| Egypt                                         | 2.0 (1.5 to 2.7)           | 2.4 (2.2 to 2.6)           | 2.5 (2.2 to 2.8)           | 3.1 (2.3 to 4.1)           | 1.6 (-0.1 to 3.3)                              | 27.5 (-2.2 to 63.4)                 |
| Iran                                          | 1.3 (1.0 to 1.6)           | 2.4 (1.8 to 3.1)           | 2.6 (1.9 to 3.5)           | 4.4 (2.3 to 7.4)           | 3.9 (1.7 to 6.0)                               | 82.1 (28.1 to 145.6)                |
| Iraq                                          | 0.9 (0.6 to 1.3)           | 1.2 (0.9 to 1.5)           | 1.3 (0.9 to 1.7)           | 1.8 (1.0 to 2.8)           | 2.4 (-0.0 to 4.8)                              | 46.4 (-0.1 to 106.2)                |
| Jordan                                        | 2.9 (2.4 to 3.4)           | 4.0 (2.8 to 5.4)           | 4.2 (2.8 to 5.8)           | 6.0 (2.9 to 10.6)          | 2.4 (-0.1 to 4.6)                              | 45.4 (-1.3 to 99.8)                 |
| Kuwait                                        | 5.9 (3.5 to 8.9)           | 9.4 (5.9 to 14.2)          | 9.8 (6.1 to 14.6)          | 14.6 (7.1 to 26.1)         | 2.7 (0.2 to 5.1)                               | 53.5 (3.7 to 113.5)                 |
| Lebanon                                       | 2.4 (1.5 to 3.7)           | 4.0 (2.5 to 6.0)           | 4.3 (2.7 to 6.2)           | 6.8 (3.4 to 12.2)          | 3.3 (0.9 to 5.7)                               | 66.8 (14.4 to 134.6)                |
| Libya                                         | 3.6 (2.2 to 5.5)           | 4.3 (2.5 to 6.2)           | 4.3 (2.6 to 6.6)           | 5.3 (2.7 to 9.7)           | 1.4 (-0.5 to 3.5)                              | 24.5 (-7.3 to 69.4)                 |
| Morocco                                       | 0.8 (0.5 to 1.2)           | 1.6 (0.9 to 2.4)           | 1.7 (1.0 to 2.6)           | 3.1 (1.4 to 5.6)           | 4.2 (1.8 to 6.7)                               | 91.4 (30.4 to 171.7)                |
| Palestine                                     | 0.8 (0.5 to 1.2)           | 1.4 (0.8 to 2.0)           | 1.5 (0.9 to 2.2)           | 2.4 (1.1 to 4.2)           | 3.5 (1.2 to 5.9)                               | 73.1 (20.2 to 141.1)                |
| Oman                                          | 2.4 (1.4 to 3.7)           | 6.2 (3.8 to 9.7)           | 6.6 (4.0 to 10.4)          | 13.6 (6.5 to 24.4)         | 5.0 (2.8 to 7.1)                               | 114.8 (52.5 to 188.0)               |
| Qatar                                         | 7.6 (4.5 to 11.6)          | 12.0 (7.3 to 18.1)         | 12.3 (7.5 to 19.0)         | 17.7 (8.4 to 32.6)         | 2.4 (-0.0 to 4.8)                              | 45.6 (-0.6 to 104.6)                |
| Saudi Arabia                                  | 2.9 (1.9 to 4.3)           | 6.8 (4.0 to 11.0)          | 7.5 (4.3 to 11.0)          | 16.5 (7.6 to 29.3)         | 5.7 (3.5 to 7.8)                               | 139.0 (67.9 to 222.6)               |
| Sudan                                         | 0.4 (0.2 to 0.6)           | 0.9 (0.5 to 1.3)           | 0.9 (0.6 to 1.4)           | 1.7 (0.8 to 3.0)           | 4.4 (2.3 to 6.7)                               | 96.2 (40.5 to 173.2)                |
| Syria                                         | 0.9 (0.6 to 1.4)           | 1.4 (0.9 to 2.2)           | 1.6 (1.0 to 2.4)           | 2.3 (1.1 to 4.2)           | 2.9 (0.6 to 5.2)                               | 56.9 (9.8 to 117.6)                 |
| Tunisia                                       | 1.4 (0.9 to 2.1)           | 2.5 (1.5 to 3.8)           | 2.6 (1.6 to 4.1)           | 4.3 (1.9 to 8.1)           | 3.4 (0.9 to 5.7)                               | 70.3 (15.2 to 133.5)                |
| Turkey                                        | 1.7 (1.1 to 2.4)           | 2.2 (1.6 to 2.9)           | 2.4 (1.7 to 3.2)           | 3.5 (1.8 to 5.5)           | 2.5 (0.1 to 4.9)                               | 49.0 (0.6 to 109.8)                 |
| United Arab Emirates                          | 7.4 (4.7 to 11.3)          | 11.8 (7.1 to 17.9)         | 11.8 (7.2 to 18.0)         | 17.6 (8.4 to 32.8)         | 2.5 (0.1 to 4.9)                               | 47.2 (1.8 to 109.6)                 |
| Yemen                                         | 0.6 (0.4 to 0.9)           | 0.8 (0.5 to 1.2)           | 0.8 (0.5 to 1.1)           | 1.0 (0.5 to 1.8)           | 1.5 (-0.7 to 3.8)                              | 26.6 (-10.6 to 76.6)                |
| <b>South Asia</b>                             |                            |                            |                            |                            |                                                |                                     |
| <b>South Asia</b>                             |                            |                            |                            |                            |                                                |                                     |
| Bangladesh                                    | 0.4 (0.2 to 0.6)           | 0.7 (0.4 to 1.1)           | 0.7 (0.4 to 1.1)           | 1.2 (0.6 to 2.3)           | 3.6 (0.9 to 6.0)                               | 75.1 (15.3 to 146.3)                |
| Bhutan                                        | 0.8 (0.5 to 1.3)           | 1.6 (1.0 to 2.5)           | 1.7 (1.0 to 2.7)           | 3.0 (1.4 to 5.5)           | 4.1 (1.6 to 6.6)                               | 88.9 (27.1 to 169.1)                |
| India                                         | 0.4 (0.3 to 0.5)           | 0.7 (0.5 to 1.0)           | 0.8 (0.6 to 1.1)           | 1.5 (0.8 to 2.7)           | 4.5 (2.0 to 7.0)                               | 100.7 (35.3 to 186.0)               |
| Nepal                                         | 0.4 (0.2 to 0.6)           | 0.8 (0.5 to 1.3)           | 0.8 (0.5 to 1.3)           | 1.4 (0.6 to 2.7)           | 3.8 (1.1 to 6.2)                               | 80.3 (18.0 to 153.1)                |
| Pakistan                                      | 0.6 (0.4 to 0.9)           | 0.9 (0.6 to 1.2)           | 0.9 (0.7 to 1.2)           | 1.3 (0.8 to 2.1)           | 2.6 (0.3 to 5.2)                               | 50.2 (4.0 to 117.4)                 |
| <b>Southeast Asia, East Asia, and Oceania</b> |                            |                            |                            |                            |                                                |                                     |
| <b>East Asia</b>                              |                            |                            |                            |                            |                                                |                                     |
| China                                         | 1.4 (1.0 to 1.9)           | 4.0 (2.9 to 5.5)           | 4.4 (3.1 to 6.1)           | 10.3 (5.6 to 17.0)         | 6.0 (3.9 to 8.1)                               | 149.5 (79.4 to 238.0)               |
| North Korea                                   | 0.9 (0.6 to 1.4)           | 1.1 (0.6 to 1.6)           | 1.1 (0.7 to 1.6)           | 1.2 (0.6 to 2.3)           | 0.8 (-1.6 to 3.3)                              | 14.0 (-21.7 to 64.6)                |
| Taiwan (Province of China)                    | 2.7 (1.9 to 3.6)           | 4.0 (3.1 to 5.6)           | 4.2 (3.1 to 5.6)           | 6.1 (3.6 to 10.2)          | 2.6 (0.3 to 4.9)                               | 50.2 (5.2 to 108.2)                 |
| <b>Oceania</b>                                |                            |                            |                            |                            |                                                |                                     |
| American Samoa                                | 3.4 (2.2 to 5.0)           | 3.8 (2.4 to 5.5)           | 3.9 (2.4 to 5.7)           | 4.5 (2.2 to 7.7)           | 0.9 (-1.3 to 3.2)                              | 16.3 (-17.9 to 60.6)                |
| Federated States of Micronesia                | 0.9 (0.6 to 1.4)           | 1.6 (1.0 to 2.4)           | 1.4 (0.9 to 2.0)           | 1.9 (1.0 to 3.0)           | 1.0 (-0.3 to 2.2)                              | 16.9 (-4.2 to 38.4)                 |
| Fiji                                          | 2.1 (1.4 to 3.3)           | 2.6 (1.6 to 4.0)           | 2.7 (1.6 to 4.2)           | 3.7 (1.7 to 6.2)           | 1.4 (-0.9 to 3.6)                              | 25.2 (-12.1 to 71.6)                |
| Guam                                          | 7.5 (4.7 to 11.3)          | 7.9 (4.9 to 11.7)          | 8.0 (5.0 to 12.0)          | 8.5 (4.2 to 15.0)          | 0.3 (-1.9 to 2.6)                              | 5.6 (-24.9 to 48.4)                 |
| Kiribati                                      | 1.2 (0.8 to 1.8)           | 1.7 (1.1 to 2.6)           | 1.9 (1.2 to 2.9)           | 2.4 (1.3 to 4.2)           | 2.2 (0.4 to 4.0)                               | 39.8 (6.4 to 83.1)                  |
| Marshall Islands                              | 2.0 (1.3 to 3.0)           | 3.1 (1.9 to 4.7)           | 3.1 (1.9 to 4.6)           | 4.3 (2.4 to 7.0)           | 2.0 (0.5 to 3.5)                               | 36.7 (8.6 to 69.9)                  |
| Northern Mariana Islands                      | 5.3 (3.3 to 8.0)           | 5.3 (3.2 to 8.1)           | 5.5 (3.3 to 8.5)           | 6.0 (3.0 to 11.3)          | 0.7 (-1.5 to 3.0)                              | 13.1 (-19.8 to 57.4)                |
| Papua New Guinea                              | 0.6 (0.4 to 1.0)           | 0.7 (0.5 to 1.1)           | 0.7 (0.4 to 1.1)           | 0.9 (0.4 to 1.6)           | 1.0 (-1.4 to 3.4)                              | 18.1 (-18.9 to 67.3)                |
| Samoa                                         | 1.0 (0.7 to 1.5)           | 1.0 (0.6 to 1.6)           | 1.1 (0.6 to 1.6)           | 1.2 (0.6 to 2.2)           | 1.1 (-0.8 to 3.0)                              | 19.6 (-11.4 to 56.5)                |
| Solomon Islands                               | 0.5 (0.3 to 0.7)           | 0.6 (0.4 to 0.9)           | 0.6 (0.4 to 0.9)           | 0.8 (0.4 to 1.4)           | 1.9 (-0.2 to 3.8)                              | 33.9 (-2.9 to 77.2)                 |
| Tonga                                         | 1.2 (0.7 to 1.7)           | 1.5 (0.9 to 2.2)           | 1.6 (1.0 to 2.5)           | 2.1 (1.1 to 3.6)           | 2.4 (0.7 to 4.0)                               | 44.1 (11.3 to 83.3)                 |
| Vanuatu                                       | 0.7 (0.5 to 1.0)           | 1.1 (0.7 to 1.7)           | 1.2 (0.7 to 1.8)           | 1.6 (0.8 to 2.7)           | 1.9 (0.4 to 3.3)                               | 33.8 (6.3 to 65.2)                  |
| <b>Southeast Asia</b>                         |                            |                            |                            |                            |                                                |                                     |
| Cambodia                                      | 0.8 (0.6 to 1.1)           | 2.3 (1.8 to 2.9)           | 2.4 (1.8 to 3.1)           | 4.7 (2.9 to 7.2)           | 4.5 (2.5 to 6.4)                               | 99.2 (46.3 to 161.2)                |
| Indonesia                                     | 1.3 (0.9 to 1.8)           | 2.6 (1.7 to 3.6)           | 2.7 (1.8 to 3.8)           | 4.2 (2.5 to 6.8)           | 3.9 (1.8 to 6.0)                               | 83.3 (30.4 to 147.6)                |
| Laos                                          | 0.7 (0.4 to 1.1)           | 1.1 (0.7 to 1.6)           | 1.2 (0.7 to 1.8)           | 1.8 (0.9 to 3.3)           | 3.2 (1.9 to 5.6)                               | 64.1 (15.8 to 132.6)                |
| Malaysia                                      | 3.0 (2.3 to 3.9)           | 5.2 (3.4 to 7.5)           | 5.2 (3.6 to 8.2)           | 9.2 (4.4 to 16.2)          | 3.5 (1.2 to 5.9)                               | 72.1 (19.3 to 141.2)                |
| Maldives                                      | 1.9 (1.1 to 2.8)           | 4.1 (2.5 to 6.4)           | 4.5 (2.7 to 6.9)           | 8.9 (4.1 to 15.9)          | 5.0 (2.6 to 7.1)                               | 113.9 (48.4 to 188.7)               |
| Mauritius                                     | 1.6 (1.1 to 2.4)           | 2.9 (1.8 to 4.4)           | 3.1 (1.9 to 4.7)           | 5.1 (2.4 to 9.3)           | 3.5 (1.0 to 5.9)                               | 72.7 (15.9 to 140.7)                |
| Myanmar                                       | 0.4 (0.3 to 0.7)           | 1.5 (0.9 to 2.3)           | 1.7 (1.0 to 2.5)           | 3.8 (1.9 to 6.4)           | 5.8 (3.9 to 7.5)                               | 142.5 (80.4 to 208.5)               |
| Philippines                                   | 1.9 (1.6 to 2.2)           | 1.5 (1.2 to 1.8)           | 1.6 (1.2 to 2.0)           | 1.5 (0.9 to 2.3)           | -0.1 (-1.8 to 1.7)                             | 0.2 (-24.1 to 29.5)                 |
| Sri Lanka                                     | 1.2 (0.8 to 1.8)           | 1.9 (1.2 to 2.9)           | 2.0 (1.2 to 3.1)           | 3.1 (1.5 to 5.9)           | 3.0 (0.7 to 5.5)                               | 60.5 (11.6 to 128.0)                |
| Seychelles                                    | 2.6 (1.6 to 4.0)           | 3.5 (2.1 to 5.6)           | 3.7 (2.2 to 5.6)           | 5.1 (2.4 to 9.6)           | 2.3 (0.0 to 4.7)                               | 42.8 (0.0 to 101.5)                 |
| Thailand                                      | 4.0 (2.8 to 5.5)           | 6.3 (4.2 to 9.0)           | 6.7 (4.5 to 9.4)           | 9.9 (5.3 to 16.8)          | 2.8 (0.8 to 4.8)                               | 54.4 (12.4 to 105.6)                |



|                                                         | Estimate in 2000 (95% UIs) | Estimate in 2015 (95% UIs) | Estimate in 2017 (95% UIs) | Estimate in 2020 (95% UIs) | Annualised rate of change, 2015-2020 (95% UIs) | Percent change, 2015-2020 (95% UIs) |
|---------------------------------------------------------|----------------------------|----------------------------|----------------------------|----------------------------|------------------------------------------------|-------------------------------------|
| Timor-Leste                                             | 0.4 (0.2 to 0.6)           | 0.8 (0.5 to 1.2)           | 0.9 (0.5 to 1.3)           | 1.4 (0.8 to 2.3)           | 3.5 (1.7 to 5.2)                               | 70.3 (29.6 to 118.2)                |
| Vietnam                                                 | 0.7 (0.4 to 1.0)           | 1.4 (0.8 to 2.3)           | 1.6 (0.9 to 2.5)           | 3.0 (1.4 to 5.9)           | 4.6 (1.9 to 7.2)                               | 104.7 (32.5 to 196.6)               |
| <b>Sub-Saharan Africa</b>                               |                            |                            |                            |                            |                                                |                                     |
| <b>Central Sub-Saharan Africa</b>                       |                            |                            |                            |                            |                                                |                                     |
| Angola                                                  | 0.4 (0.2 to 0.6)           | 0.6 (0.4 to 0.9)           | 0.7 (0.4 to 1.0)           | 1.0 (0.5 to 1.8)           | 2.9 (0.2 to 5.5)                               | 57.5 (2.5 to 129.7)                 |
| Central African Republic                                | 0.3 (0.2 to 0.4)           | 0.3 (0.2 to 0.5)           | 0.3 (0.2 to 0.5)           | 0.4 (0.2 to 0.7)           | 1.8 (0.1 to 3.7)                               | 33.0 (2.1 to 74.4)                  |
| Congo                                                   | 0.6 (0.3 to 0.8)           | 1.0 (0.6 to 1.5)           | 1.1 (0.7 to 1.6)           | 1.8 (0.9 to 3.1)           | 3.5 (1.2 to 5.7)                               | 73.0 (19.8 to 135.0)                |
| Democratic Republic of the Congo                        | 0.2 (0.1 to 0.3)           | 0.4 (0.2 to 0.6)           | 0.4 (0.2 to 0.6)           | 0.6 (0.3 to 1.0)           | 2.5 (0.5 to 4.7)                               | 47.8 (8.0 to 103.3)                 |
| Equatorial Guinea                                       | 0.6 (0.3 to 0.8)           | 1.4 (0.8 to 2.1)           | 1.5 (0.9 to 2.4)           | 3.3 (1.6 to 6.0)           | 5.6 (3.1 to 8.0)                               | 136.5 (58.2 to 230.0)               |
| Gabon                                                   | 0.9 (0.6 to 1.4)           | 1.3 (0.8 to 2.0)           | 1.4 (0.9 to 2.1)           | 2.0 (1.0 to 3.6)           | 2.7 (0.2 to 5.1)                               | 52.7 (2.9 to 115.5)                 |
| <b>Eastern Sub-Saharan Africa</b>                       |                            |                            |                            |                            |                                                |                                     |
| Burundi                                                 | 0.8 (0.5 to 1.1)           | 1.1 (0.7 to 1.7)           | 1.2 (0.8 to 1.7)           | 1.6 (0.8 to 2.8)           | 2.2 (0.1 to 4.3)                               | 41.3 (1.5 to 90.8)                  |
| Comoros                                                 | 1.2 (0.8 to 1.8)           | 2.0 (1.4 to 3.0)           | 2.2 (1.4 to 3.1)           | 3.3 (1.7 to 5.8)           | 3.1 (0.8 to 5.4)                               | 62.0 (12.4 to 123.6)                |
| Djibouti                                                | 0.7 (0.5 to 1.1)           | 1.8 (1.2 to 2.6)           | 1.9 (1.3 to 2.8)           | 3.6 (2.0 to 6.2)           | 4.5 (2.3 to 6.5)                               | 99.2 (41.7 to 165.9)                |
| Eritrea                                                 | 1.0 (0.7 to 1.5)           | 1.3 (0.9 to 1.9)           | 1.4 (0.9 to 2.0)           | 2.0 (1.1 to 3.5)           | 2.9 (1.2 to 4.7)                               | 56.6 (19.8 to 102.6)                |
| Ethiopia                                                | 0.2 (0.1 to 0.3)           | 0.4 (0.2 to 0.6)           | 0.4 (0.2 to 0.7)           | 0.8 (0.3 to 1.4)           | 4.1 (1.9 to 6.1)                               | 86.2 (32.6 to 150.8)                |
| Kenya                                                   | 1.6 (1.0 to 2.3)           | 2.5 (1.6 to 3.8)           | 2.7 (1.7 to 4.0)           | 4.2 (2.2 to 7.4)           | 3.3 (1.1 to 5.5)                               | 65.6 (17.4 to 126.7)                |
| Madagascar                                              | 1.1 (0.7 to 1.6)           | 1.4 (0.9 to 2.1)           | 1.5 (1.0 to 2.1)           | 1.9 (1.0 to 3.2)           | 1.7 (-0.5 to 3.8)                              | 30.9 (-6.8 to 77.7)                 |
| Malawi                                                  | 0.8 (0.5 to 1.1)           | 1.4 (0.9 to 2.1)           | 1.5 (1.0 to 2.2)           | 2.5 (1.3 to 4.2)           | 3.6 (1.5 to 5.6)                               | 75.1 (25.7 to 131.4)                |
| Mozambique                                              | 0.3 (0.2 to 0.4)           | 0.6 (0.5 to 0.8)           | 0.7 (0.5 to 1.0)           | 1.3 (0.7 to 2.2)           | 4.7 (2.4 to 6.9)                               | 104.6 (43.5 to 180.1)               |
| Rwanda                                                  | 0.6 (0.4 to 0.7)           | 1.1 (0.9 to 1.3)           | 1.1 (0.9 to 1.4)           | 1.8 (1.1 to 2.7)           | 3.2 (1.3 to 5.2)                               | 62.7 (20.9 to 118.4)                |
| Somalia                                                 | 0.5 (0.3 to 0.7)           | 0.8 (0.5 to 1.2)           | 0.9 (0.6 to 1.3)           | 1.4 (0.7 to 2.4)           | 3.5 (1.4 to 5.4)                               | 70.3 (22.6 to 124.9)                |
| South Sudan                                             | 0.7 (0.4 to 1.0)           | 0.9 (0.6 to 1.4)           | 1.0 (0.6 to 1.4)           | 1.4 (0.7 to 2.4)           | 2.5 (0.3 to 4.9)                               | 48.7 (4.7 to 109.2)                 |
| Tanzania                                                | 1.0 (0.8 to 1.2)           | 2.7 (2.1 to 3.4)           | 3.0 (2.4 to 3.9)           | 6.5 (4.0 to 9.8)           | 5.7 (3.9 to 7.5)                               | 138.2 (79.0 to 208.5)               |
| Uganda                                                  | 1.0 (0.9 to 1.1)           | 1.6 (1.3 to 2.1)           | 1.7 (1.3 to 2.3)           | 2.7 (1.6 to 4.2)           | 3.1 (1.4 to 4.8)                               | 61.4 (23.2 to 104.4)                |
| Zambia                                                  | 1.3 (1.1 to 1.6)           | 1.8 (1.4 to 2.1)           | 1.9 (1.5 to 2.4)           | 2.7 (1.6 to 4.0)           | 2.7 (0.7 to 4.4)                               | 50.7 (11.9 to 93.0)                 |
| <b>Southern Sub-Saharan Africa</b>                      |                            |                            |                            |                            |                                                |                                     |
| Botswana                                                | 1.2 (0.8 to 1.7)           | 2.5 (1.6 to 3.5)           | 2.6 (1.6 to 3.8)           | 4.8 (2.3 to 8.4)           | 4.2 (1.6 to 6.5)                               | 91.4 (27.1 to 164.2)                |
| Lesotho                                                 | 0.3 (0.2 to 0.6)           | 0.5 (0.3 to 0.8)           | 0.5 (0.3 to 0.9)           | 0.8 (0.3 to 1.6)           | 3.1 (0.2 to 5.8)                               | 62.6 (2.8 to 137.2)                 |
| Namibia                                                 | 0.8 (0.4 to 1.5)           | 1.0 (0.6 to 1.7)           | 1.1 (0.6 to 1.8)           | 1.5 (0.6 to 3.0)           | 2.0 (-1.3 to 5.4)                              | 39.2 (-18.1 to 125.9)               |
| South Africa                                            | 2.1 (1.6 to 2.7)           | 2.4 (1.8 to 3.1)           | 2.3 (1.7 to 3.1)           | 2.8 (1.6 to 4.5)           | 0.8 (-1.3 to 2.9)                              | 13.4 (-17.1 to 54.4)                |
| Swaziland                                               | 0.6 (0.3 to 0.9)           | 0.8 (0.4 to 1.3)           | 0.8 (0.4 to 1.3)           | 1.1 (0.5 to 2.3)           | 2.5 (-0.3 to 5.4)                              | 49.1 (-4.6 to 123.2)                |
| Zimbabwe                                                | 0.8 (0.4 to 1.4)           | 0.7 (0.4 to 1.3)           | 0.8 (0.4 to 1.3)           | 0.8 (0.3 to 1.6)           | 0.3 (-2.0 to 3.0)                              | 6.7 (-26.3 to 57.1)                 |
| <b>Western Sub-Saharan Africa</b>                       |                            |                            |                            |                            |                                                |                                     |
| Benin                                                   | 0.6 (0.3 to 1.0)           | 0.8 (0.4 to 1.2)           | 0.8 (0.5 to 1.2)           | 1.0 (0.5 to 1.9)           | 1.8 (-0.8 to 4.4)                              | 34.3 (-11.0 to 94.8)                |
| Burkina Faso                                            | 0.6 (0.3 to 0.9)           | 0.9 (0.6 to 1.4)           | 0.9 (0.6 to 1.4)           | 1.4 (0.6 to 2.5)           | 2.5 (0.0 to 5.1)                               | 48.1 (0.7 to 114.3)                 |
| Cameroon                                                | 1.1 (0.7 to 1.6)           | 1.6 (1.1 to 2.6)           | 1.8 (1.2 to 2.6)           | 2.6 (1.3 to 4.9)           | 2.8 (0.5 to 5.2)                               | 54.8 (7.0 to 119.3)                 |
| Cape Verde                                              | 1.0 (0.6 to 1.6)           | 1.9 (1.2 to 3.0)           | 2.0 (1.2 to 3.1)           | 3.3 (1.5 to 5.8)           | 3.3 (0.9 to 5.7)                               | 68.2 (14.0 to 135.8)                |
| Chad                                                    | 0.5 (0.3 to 0.8)           | 0.6 (0.4 to 1.0)           | 0.7 (0.4 to 1.0)           | 0.9 (0.4 to 1.6)           | 1.9 (-0.8 to 4.6)                              | 35.7 (-10.9 to 98.6)                |
| Cote d'Ivoire                                           | 0.9 (0.6 to 1.4)           | 1.2 (0.7 to 1.9)           | 1.3 (0.8 to 2.0)           | 1.7 (0.8 to 3.0)           | 2.1 (-0.4 to 4.5)                              | 38.9 (-6.0 to 96.0)                 |
| The Gambia                                              | 0.8 (0.5 to 1.2)           | 1.0 (0.6 to 1.5)           | 1.0 (0.7 to 1.6)           | 1.3 (0.6 to 2.3)           | 1.4 (-0.9 to 3.7)                              | 25.2 (-12.9 to 74.9)                |
| Ghana                                                   | 1.1 (0.7 to 1.5)           | 1.9 (1.4 to 2.6)           | 1.9 (1.3 to 2.6)           | 2.7 (1.5 to 4.4)           | 2.1 (-0.1 to 4.2)                              | 39.2 (-0.8 to 88.9)                 |
| Guinea                                                  | 0.3 (0.2 to 0.4)           | 0.5 (0.3 to 0.7)           | 0.5 (0.3 to 0.7)           | 0.7 (0.3 to 1.2)           | 2.1 (-0.0 to 4.3)                              | 33.9 (-0.0 to 90.3)                 |
| Guinea-Bissau                                           | 0.7 (0.4 to 1.1)           | 1.0 (0.6 to 1.5)           | 1.0 (0.6 to 1.5)           | 1.4 (0.7 to 2.5)           | 2.5 (0.6 to 4.2)                               | 46.5 (9.2 to 87.0)                  |
| Liberia                                                 | 0.6 (0.3 to 0.9)           | 1.5 (0.8 to 2.5)           | 1.3 (0.8 to 2.1)           | 2.4 (1.2 to 4.0)           | 2.8 (0.9 to 4.5)                               | 53.4 (15.3 to 95.0)                 |
| Mali                                                    | 0.5 (0.3 to 0.8)           | 0.7 (0.4 to 1.1)           | 0.7 (0.4 to 1.1)           | 1.0 (0.4 to 1.8)           | 2.0 (-0.5 to 4.6)                              | 38.2 (-6.8 to 99.8)                 |
| Mauritania                                              | 0.8 (0.5 to 1.3)           | 1.0 (0.6 to 1.6)           | 1.1 (0.6 to 1.6)           | 1.4 (0.6 to 2.5)           | 1.8 (-0.5 to 4.0)                              | 32.5 (-7.1 to 82.9)                 |
| Niger                                                   | 0.5 (0.2 to 0.7)           | 0.5 (0.3 to 0.8)           | 0.6 (0.3 to 0.9)           | 0.7 (0.3 to 1.3)           | 1.3 (-1.2 to 4.0)                              | 23.5 (-17.1 to 81.9)                |
| Nigeria                                                 | 1.0 (0.7 to 1.3)           | 1.6 (1.2 to 1.9)           | 1.6 (1.2 to 2.1)           | 2.3 (1.3 to 3.8)           | 2.4 (0.3 to 4.7)                               | 45.0 (4.1 to 102.6)                 |
| Sao Tome and Principe                                   | 0.9 (0.6 to 1.3)           | 1.4 (0.9 to 2.1)           | 1.5 (0.9 to 2.3)           | 2.2 (1.1 to 3.8)           | 2.7 (0.6 to 4.6)                               | 51.7 (8.6 to 99.6)                  |
| Senegal                                                 | 0.8 (0.7 to 1.0)           | 0.8 (0.6 to 1.2)           | 0.9 (0.6 to 1.3)           | 1.0 (0.5 to 1.8)           | 0.8 (-1.4 to 3.0)                              | 13.6 (-18.9 to 57.3)                |
| Sierra Leone                                            | 1.3 (0.8 to 1.8)           | 2.3 (1.7 to 3.0)           | 2.3 (1.6 to 3.0)           | 3.4 (1.9 to 5.3)           | 2.4 (0.3 to 4.6)                               | 45.9 (4.8 to 98.6)                  |
| Togo                                                    | 0.7 (0.4 to 1.1)           | 1.1 (0.7 to 1.7)           | 1.1 (0.7 to 1.8)           | 1.7 (0.9 to 3.2)           | 3.0 (0.5 to 5.3)                               | 59.1 (7.3 to 121.4)                 |
| <b>Indicator 3.1c: Pharmacists per 1,000 population</b> |                            |                            |                            |                            |                                                |                                     |
| <b>Central Europe, Eastern Europe, and Central Asia</b> |                            |                            |                            |                            |                                                |                                     |
| <b>Central Asia</b>                                     |                            |                            |                            |                            |                                                |                                     |
| Armenia                                                 | 0.2 (0.1 to 0.4)           | 0.6 (0.4 to 0.8)           | 0.6 (0.4 to 0.8)           | 1.1 (0.5 to 2.2)           | 4.2 (0.8 to 7.5)                               | 94.4 (12.7 to 209.9)                |
| Azerbaijan                                              | 0.3 (0.2 to 0.6)           | 0.8 (0.5 to 1.5)           | 0.9 (0.5 to 1.5)           | 1.6 (0.6 to 3.4)           | 4.0 (0.4 to 7.0)                               | 87.4 (6.9 to 186.8)                 |
| Georgia                                                 | 0.6 (0.3 to 0.9)           | 0.9 (0.5 to 1.4)           | 0.9 (0.5 to 1.5)           | 1.5 (0.5 to 3.1)           | 2.8 (-0.9 to 6.2)                              | 58.8 (-12.9 to 153.8)               |
| Kazakhstan                                              | 0.5 (0.3 to 0.9)           | 0.9 (0.5 to 1.6)           | 1.0 (0.5 to 1.7)           | 1.5 (0.5 to 3.4)           | 3.0 (-0.4 to 6.5)                              | 62.2 (-6.0 to 166.3)                |
| Kyrgyzstan                                              | 0.3 (0.1 to 0.5)           | 0.4 (0.2 to 0.7)           | 0.4 (0.2 to 0.8)           | 0.6 (0.2 to 1.5)           | 2.2 (-1.4 to 6.0)                              | 44.7 (-18.4 to 144.4)               |
| Mongolia                                                | 0.3 (0.2 to 0.4)           | 0.6 (0.3 to 1.0)           | 0.6 (0.3 to 1.1)           | 1.2 (0.4 to 2.5)           | 3.9 (0.7 to 7.0)                               | 84.7 (11.3 to 185.0)                |
| Tajikistan                                              | 0.1 (0.0 to 0.1)           | 0.1 (0.1 to 0.2)           | 0.1 (0.1 to 0.2)           | 0.2 (0.1 to 0.6)           | 4.0 (0.3 to 7.4)                               | 88.8 (5.0 to 202.9)                 |
| Turkmenistan                                            | 0.4 (0.2 to 0.6)           | 0.7 (0.4 to 1.1)           | 0.7 (0.4 to 1.2)           | 1.2 (0.5 to 2.7)           | 3.4 (0.1 to 6.8)                               | 71.6 (1.9 to 175.6)                 |
| Uzbekistan                                              | 0.2 (0.1 to 0.4)           | 0.5 (0.3 to 0.8)           | 0.5 (0.3 to 0.9)           | 0.9 (0.3 to 2.0)           | 4.1 (0.8 to 7.6)                               | 92.8 (11.9 to 212.8)                |
| <b>Central Europe</b>                                   |                            |                            |                            |                            |                                                |                                     |
| Albania                                                 | 0.2 (0.1 to 0.3)           | 0.3 (0.2 to 0.4)           | 0.3 (0.2 to 0.5)           | 0.5 (0.2 to 0.9)           | 2.6 (-0.5 to 5.6)                              | 51.3 (-7.7 to 132.9)                |
| Bosnia and Herzegovina                                  | 0.2 (0.1 to 0.3)           | 0.3 (0.2 to 0.6)           | 0.3 (0.2 to 0.6)           | 0.5 (0.2 to 1.1)           | 2.9 (-0.4 to 6.4)                              | 60.4 (-6.1 to 161.3)                |
| Bulgaria                                                | 0.4 (0.3 to 0.7)           | 0.7 (0.4 to 1.1)           | 0.7 (0.4 to 1.1)           | 1.0 (0.4 to 2.3)           | 2.2 (-1.0 to 5.3)                              | 44.2 (-14.2 to 122.5)               |
| Croatia                                                 | 0.6 (0.4 to 0.8)           | 0.8 (0.6 to 1.0)           | 0.8 (0.6 to 1.1)           | 1.1 (0.6 to 2.1)           | 2.1 (-0.6 to 4.8)                              | 39.9 (-9.1 to 105.8)                |
| Czech Republic                                          | 0.5 (0.4 to 0.6)           | 0.7 (0.5 to 0.9)           | 0.7 (0.5 to 1.0)           | 1.6 (-0.9 to 4.2)          | 1.6 (-0.9 to 4.2)                              | 30.6 (-13.0 to 86.7)                |
| Hungary                                                 | 0.6 (0.5 to 0.6)           | 0.6 (0.4 to 0.8)           | 0.6 (0.4 to 0.8)           | 0.6 (0.3 to 1.1)           | 0.3 (-1.9 to 2.8)                              | 6.9 (-25.2 to 51.4)                 |
| Macedonia                                               | 0.2 (0.1 to 0.4)           | 0.4 (0.2 to 0.7)           | 0.5 (0.2 to 0.8)           | 0.7 (0.3 to 1.6)           | 3.1 (-0.2 to 6.3)                              | 65.6 (-2.5 to 157.9)                |
| Montenegro                                              | 0.3 (0.2 to 0.6)           | 0.5 (0.3 to 0.8)           | 0.5 (0.3 to 0.8)           | 0.7 (0.3 to 1.5)           | 2.1 (-1.3 to 5.5)                              | 41.2 (-17.5 to 126.7)               |
| Poland                                                  | 0.5 (0.3 to 0.8)           | 0.9 (0.6 to 1.4)           | 0.9 (0.6 to 1.4)           | 1.5 (0.6 to 3.0)           | 2.9 (-0.2 to 6.1)                              | 59.0 (-3.2 to 149.3)                |
| Romania                                                 | 0.4 (0.4 to 0.5)           | 0.6 (0.5 to 0.7)           | 0.6 (0.5 to 0.8)           | 0.8 (0.5 to 1.4)           | 1.8 (-0.6 to 4.2)                              | 33.6 (-8.6 to 89.2)                 |
| Serbia                                                  | 0.2 (0.1 to 0.4)           | 0.3 (0.2 to 0.6)           | 0.4 (0.2 to 0.6)           | 0.5 (0.2 to 1.2)           | 2.5 (-0.9 to 6.0)                              | 50.3 (-12.9 to 144.8)               |
| Slovakia                                                | 0.5 (0.4 to 0.6)           | 0.8 (0.6 to 0.9)           | 0.8 (0.6 to 1.0)           | 1.2 (0.6 to 2.0)           | 2.7 (0.3 to 5.0)                               | 51.7 (4.7 to 112.8)                 |
| Slovenia                                                | 0.6 (0.4 to 0.9)           | 1.0 (0.7 to 1.5)           | 1.0 (0.6 to 1.5)           | 1.5 (0.7 to 2.8)           | 2.2 (-0.7 to 5.3)                              | 43.5 (-10.4 to 120.4)               |
| <b>Eastern Europe</b>                                   |                            |                            |                            |                            |                                                |                                     |

|                                  | Estimate in 2000 (95% UIs) | Estimate in 2015 (95% UIs) | Estimate in 2017 (95% UIs) | Estimate in 2020 (95% UIs) | Annualised rate of change, 2015-2020 (95% UIs) | Percent change, 2015-2020 (95% UIs) |
|----------------------------------|----------------------------|----------------------------|----------------------------|----------------------------|------------------------------------------------|-------------------------------------|
| Belarus                          | 0.5 (0.3 to 0.7)           | 0.8 (0.5 to 1.2)           | 0.8 (0.5 to 1.3)           | 1.4 (0.5 to 2.8)           | 2.9 (-0.5 to 6.4)                              | 59.6 (-7.6 to 160.2)                |
| Estonia                          | 0.5 (0.4 to 0.7)           | 0.7 (0.5 to 0.9)           | 0.7 (0.5 to 1.0)           | 0.9 (0.4 to 1.7)           | 1.3 (-1.4 to 4.0)                              | 23.6 (-19.2 to 81.9)                |
| Latvia                           | 0.6 (0.5 to 0.8)           | 0.8 (0.6 to 1.1)           | 0.8 (0.6 to 1.2)           | 1.1 (0.5 to 1.9)           | 1.6 (-1.0 to 4.3)                              | 29.7 (-13.9 to 89.6)                |
| Lithuania                        | 0.6 (0.5 to 0.7)           | 0.8 (0.6 to 1.1)           | 0.8 (0.6 to 1.1)           | 1.2 (0.6 to 2.0)           | 2.1 (-0.4 to 4.5)                              | 39.5 (-5.7 to 96.8)                 |
| Moldova                          | 0.2 (0.1 to 0.4)           | 0.4 (0.2 to 0.7)           | 0.4 (0.2 to 0.7)           | 0.7 (0.2 to 1.4)           | 2.9 (-0.5 to 6.2)                              | 60.1 (-6.7 to 154.3)                |
| Russia                           | 0.7 (0.5 to 1.0)           | 1.1 (0.7 to 1.7)           | 1.1 (0.7 to 1.8)           | 1.7 (0.7 to 3.8)           | 2.3 (-0.8 to 5.5)                              | 45.7 (-10.8 to 129.8)               |
| Ukraine                          | 0.4 (0.2 to 0.7)           | 0.6 (0.3 to 0.9)           | 0.6 (0.3 to 1.0)           | 0.8 (0.3 to 1.7)           | 1.7 (-1.6 to 5.1)                              | 33.9 (-21.4 to 114.8)               |
| High-income                      |                            |                            |                            |                            |                                                |                                     |
| Australasia                      |                            |                            |                            |                            |                                                |                                     |
| Australia                        | 0.7 (0.4 to 1.0)           | 0.9 (0.5 to 1.3)           | 0.9 (0.5 to 1.4)           | 1.1 (0.5 to 2.3)           | 1.4 (-1.6 to 4.5)                              | 26.5 (-21.1 to 95.0)                |
| New Zealand                      | 0.7 (0.4 to 1.1)           | 0.9 (0.5 to 1.4)           | 0.9 (0.5 to 1.5)           | 1.2 (0.5 to 2.5)           | 1.2 (-1.7 to 4.5)                              | 24.0 (-22.7 to 96.0)                |
| High-income Asia Pacific         |                            |                            |                            |                            |                                                |                                     |
| Bhunei                           | 0.6 (0.3 to 1.0)           | 0.9 (0.5 to 1.6)           | 1.0 (0.6 to 1.7)           | 1.5 (0.6 to 3.3)           | 2.8 (-0.9 to 6.2)                              | 57.0 (-12.6 to 153.1)               |
| Japan                            | 1.0 (0.6 to 1.5)           | 1.2 (0.8 to 1.7)           | 1.2 (0.7 to 1.8)           | 1.4 (0.6 to 2.8)           | 1.0 (-1.9 to 4.3)                              | 18.8 (-25.2 to 91.6)                |
| South Korea                      | 0.4 (0.3 to 0.7)           | 0.8 (0.5 to 1.2)           | 0.8 (0.5 to 1.2)           | 1.3 (0.5 to 2.5)           | 3.1 (-0.1 to 6.5)                              | 64.8 (-1.3 to 163.7)                |
| Singapore                        | 0.7 (0.4 to 1.2)           | 1.2 (0.7 to 2.1)           | 1.3 (0.7 to 2.2)           | 2.0 (0.7 to 4.4)           | 2.7 (-0.6 to 6.1)                              | 56.1 (-8.0 to 151.0)                |
| High-income North America        |                            |                            |                            |                            |                                                |                                     |
| Canada                           | 0.7 (0.5 to 1.1)           | 0.8 (0.5 to 1.4)           | 0.8 (0.4 to 1.4)           | 0.9 (0.4 to 2.0)           | 0.4 (-2.4 to 3.7)                              | 9.3 (-30.2 to 74.2)                 |
| Greenland                        | 0.4 (0.2 to 0.7)           | 0.5 (0.3 to 0.9)           | 0.5 (0.3 to 0.9)           | 0.7 (0.3 to 1.6)           | 1.6 (-1.7 to 5.3)                              | 31.9 (-23.1 to 122.1)               |
| United States                    | 0.6 (0.4 to 0.8)           | 0.7 (0.5 to 1.0)           | 0.7 (0.5 to 1.1)           | 0.9 (0.4 to 1.8)           | 0.9 (-1.7 to 4.1)                              | 17.9 (-22.8 to 85.9)                |
| Southern Latin America           |                            |                            |                            |                            |                                                |                                     |
| Argentina                        | 0.4 (0.2 to 0.6)           | 0.5 (0.3 to 0.9)           | 0.6 (0.3 to 0.9)           | 0.8 (0.3 to 1.6)           | 2.0 (-1.2 to 5.3)                              | 39.8 (-17.0 to 122.7)               |
| Chile                            | 0.1 (0.1 to 0.1)           | 0.1 (0.1 to 0.2)           | 0.1 (0.1 to 0.2)           | 0.2 (0.1 to 0.5)           | 3.4 (0.7 to 6.3)                               | 70.4 (10.3 to 156.3)                |
| Uruguay                          | 0.0 (0.0 to 0.0)           | 0.0 (0.0 to 0.0)           | 0.0 (0.0 to 0.0)           | 0.1 (0.0 to 0.1)           | 3.9 (0.8 to 7.3)                               | 83.8 (12.7 to 199.0)                |
| Western Europe                   |                            |                            |                            |                            |                                                |                                     |
| Andorra                          | 1.1 (0.6 to 1.9)           | 1.2 (0.6 to 2.1)           | 1.2 (0.6 to 2.2)           | 1.4 (0.5 to 3.5)           | 0.7 (-2.6 to 4.4)                              | 15.2 (-32.0 to 92.8)                |
| Austria                          | 0.6 (0.5 to 0.7)           | 0.7 (0.5 to 1.0)           | 0.8 (0.5 to 1.0)           | 1.0 (0.5 to 1.7)           | 1.5 (-1.1 to 4.0)                              | 26.7 (-14.9 to 81.0)                |
| Belgium                          | 0.9 (0.8 to 1.0)           | 0.9 (0.7 to 1.1)           | 0.9 (0.6 to 1.2)           | 0.9 (0.5 to 1.6)           | -0.0 (-2.4 to 2.3)                             | 1.6 (-30.3 to 41.7)                 |
| Cyprus                           | 1.3 (1.0 to 1.6)           | 1.7 (1.3 to 2.2)           | 1.8 (1.3 to 2.4)           | 2.3 (1.2 to 4.1)           | 1.8 (-0.8 to 4.3)                              | 32.6 (-10.7 to 90.6)                |
| Denmark                          | 0.7 (0.6 to 0.8)           | 0.9 (0.7 to 1.2)           | 0.9 (0.6 to 1.3)           | 1.1 (0.5 to 2.0)           | 0.8 (-1.7 to 3.5)                              | 15.7 (-22.1 to 68.2)                |
| Finland                          | 0.6 (0.5 to 0.7)           | 0.6 (0.4 to 0.8)           | 0.6 (0.4 to 0.8)           | 0.6 (0.3 to 1.1)           | -0.0 (-2.5 to 2.7)                             | 1.6 (-31.4 to 50.6)                 |
| France                           | 0.7 (0.7 to 0.8)           | 0.7 (0.5 to 0.9)           | 0.7 (0.5 to 0.9)           | 0.7 (0.4 to 1.1)           | -0.6 (-2.6 to 1.8)                             | -6.7 (-32.3 to 31.4)                |
| Germany                          | 0.8 (0.8 to 0.9)           | 1.2 (0.9 to 1.5)           | 1.3 (0.9 to 1.7)           | 1.8 (0.9 to 2.9)           | 2.1 (-0.3 to 4.3)                              | 39.0 (-4.8 to 90.6)                 |
| Greece                           | 0.6 (0.6 to 0.7)           | 0.6 (0.4 to 0.7)           | 0.6 (0.4 to 0.8)           | 0.6 (0.3 to 1.0)           | -0.2 (-2.3 to 2.1)                             | -2.1 (-29.5 to 36.5)                |
| Iceland                          | 1.1 (0.9 to 1.4)           | 1.5 (1.1 to 2.0)           | 1.5 (1.1 to 2.1)           | 1.9 (1.0 to 3.5)           | 1.4 (-1.3 to 4.0)                              | 25.0 (-17.5 to 81.3)                |
| Ireland                          | 0.6 (0.5 to 0.7)           | 0.7 (0.6 to 1.0)           | 0.8 (0.5 to 1.0)           | 1.0 (0.5 to 1.8)           | 1.8 (-0.8 to 4.3)                              | 33.2 (-10.7 to 89.3)                |
| Israel                           | 0.4 (0.3 to 0.6)           | 0.7 (0.4 to 0.9)           | 0.7 (0.4 to 1.0)           | 1.1 (0.5 to 2.0)           | 3.0 (-0.3 to 6.0)                              | 60.8 (-3.7 to 145.9)                |
| Italy                            | 0.6 (0.5 to 0.6)           | 0.8 (0.6 to 1.0)           | 0.8 (0.6 to 1.1)           | 1.2 (0.6 to 1.9)           | 2.3 (-0.2 to 4.7)                              | 43.5 (-2.9 to 102.3)                |
| Luxembourg                       | 1.0 (0.8 to 1.2)           | 0.9 (0.7 to 1.3)           | 0.9 (0.7 to 1.4)           | 1.0 (0.5 to 2.0)           | 0.3 (-1.9 to 3.0)                              | 7.4 (-25.4 to 56.1)                 |
| Malta                            | 0.6 (0.3 to 0.9)           | 0.8 (0.4 to 1.4)           | 0.8 (0.4 to 1.4)           | 1.1 (0.4 to 2.5)           | 2.1 (-1.5 to 5.5)                              | 41.2 (-20.0 to 129.8)               |
| Netherlands                      | 0.4 (0.4 to 0.5)           | 0.4 (0.3 to 0.5)           | 0.4 (0.3 to 0.5)           | 0.4 (0.2 to 0.7)           | -0.0 (-2.4 to 2.5)                             | 1.5 (-30.0 to 45.3)                 |
| Norway                           | 0.5 (0.4 to 0.5)           | 0.7 (0.5 to 0.9)           | 0.7 (0.5 to 0.9)           | 0.9 (0.4 to 1.6)           | 1.7 (0.9 to 4.4)                               | 31.7 (-12.9 to 95.9)                |
| Portugal                         | 0.6 (0.5 to 0.7)           | 0.7 (0.5 to 0.9)           | 0.7 (0.5 to 1.0)           | 0.9 (0.4 to 1.6)           | 1.3 (-1.3 to 4.0)                              | 25.1 (-18.2 to 83.5)                |
| Spain                            | 0.6 (0.5 to 0.7)           | 0.7 (0.5 to 0.9)           | 0.7 (0.5 to 0.9)           | 0.8 (0.4 to 1.3)           | 0.5 (-1.6 to 3.0)                              | 10.2 (-20.9 to 56.2)                |
| Sweden                           | 0.4 (0.3 to 0.5)           | 0.6 (0.5 to 0.8)           | 0.7 (0.5 to 0.9)           | 0.9 (0.5 to 1.6)           | 2.3 (-0.2 to 4.9)                              | 43.2 (-2.8 to 108.1)                |
| Switzerland                      | 0.7 (0.7 to 0.8)           | 1.1 (0.8 to 1.5)           | 1.1 (0.8 to 1.5)           | 1.5 (0.9 to 2.6)           | 2.1 (-0.1 to 4.5)                              | 39.9 (-1.3 to 95.3)                 |
| United Kingdom                   | 0.5 (0.4 to 0.5)           | 0.6 (0.5 to 0.8)           | 0.6 (0.5 to 0.8)           | 0.8 (0.4 to 1.2)           | 1.0 (-1.2 to 3.2)                              | 18.4 (-16.4 to 62.1)                |
| Latin America and Caribbean      |                            |                            |                            |                            |                                                |                                     |
| Andean Latin America             |                            |                            |                            |                            |                                                |                                     |
| Bolivia                          | 0.6 (0.5 to 0.8)           | 1.1 (0.7 to 1.8)           | 1.2 (0.7 to 2.0)           | 2.1 (0.8 to 4.5)           | 3.7 (0.8 to 6.7)                               | 77.6 (12.6 to 173.3)                |
| Ecuador                          | 0.1 (0.0 to 0.1)           | 0.1 (0.1 to 0.1)           | 0.1 (0.1 to 0.1)           | 0.1 (0.1 to 0.3)           | 3.2 (0.1 to 6.4)                               | 66.8 (1.2 to 159.7)                 |
| Peru                             | 0.2 (0.1 to 0.4)           | 0.3 (0.2 to 0.6)           | 0.4 (0.2 to 0.6)           | 0.5 (0.2 to 1.1)           | 2.5 (-1.1 to 5.8)                              | 51.4 (-15.3 to 137.1)               |
| Caribbean                        |                            |                            |                            |                            |                                                |                                     |
| Antigua and Barbuda              | 0.3 (0.2 to 0.6)           | 0.4 (0.2 to 0.8)           | 0.5 (0.2 to 0.8)           | 0.6 (0.2 to 1.4)           | 2.1 (-1.3 to 5.6)                              | 42.1 (-17.8 to 131.7)               |
| The Bahamas                      | 0.4 (0.2 to 0.7)           | 0.6 (0.3 to 1.0)           | 0.6 (0.3 to 1.0)           | 0.8 (0.3 to 1.6)           | 1.8 (-1.3 to 5.1)                              | 35.3 (-18.3 to 113.9)               |
| Barbados                         | 0.4 (0.2 to 0.7)           | 0.5 (0.3 to 0.9)           | 0.5 (0.3 to 1.0)           | 0.7 (0.2 to 1.7)           | 1.7 (-1.8 to 5.4)                              | 33.1 (-23.7 to 124.5)               |
| Belize                           | 0.1 (0.1 to 0.2)           | 0.2 (0.1 to 0.4)           | 0.2 (0.1 to 0.4)           | 0.5 (0.1 to 1.0)           | 4.0 (0.5 to 7.8)                               | 88.4 (7.2 to 223.5)                 |
| Bermuda                          | 0.6 (0.3 to 1.1)           | 0.8 (0.4 to 1.4)           | 0.8 (0.4 to 1.4)           | 1.0 (0.3 to 2.2)           | 1.0 (-2.3 to 4.9)                              | 21.4 (-29.5 to 107.3)               |
| Cuba                             | 0.5 (0.4 to 0.7)           | 0.9 (0.5 to 1.5)           | 0.9 (0.5 to 1.6)           | 1.5 (0.5 to 3.7)           | 2.7 (-0.5 to 5.7)                              | 53.3 (-7.6 to 136.1)                |
| Dominica                         | 0.2 (0.1 to 0.3)           | 0.3 (0.2 to 0.6)           | 0.3 (0.2 to 0.6)           | 0.6 (0.2 to 1.2)           | 3.0 (-0.3 to 6.5)                              | 63.8 (-4.8 to 165.9)                |
| Dominican Republic               | 0.1 (0.1 to 0.2)           | 0.2 (0.1 to 0.3)           | 0.2 (0.1 to 0.4)           | 0.2 (0.1 to 0.7)           | 2.0 (-1.3 to 5.5)                              | 39.9 (-18.0 to 129.9)               |
| Grenada                          | 0.2 (0.1 to 0.3)           | 0.3 (0.1 to 0.5)           | 0.3 (0.1 to 0.5)           | 0.4 (0.1 to 1.0)           | 2.8 (0.7 to 6.3)                               | 57.8 (-0.1 to 158.3)                |
| Guyana                           | 0.1 (0.1 to 0.2)           | 0.2 (0.1 to 0.3)           | 0.2 (0.1 to 0.4)           | 0.3 (0.1 to 0.8)           | 3.1 (-0.3 to 6.7)                              | 66.2 (-5.1 to 172.8)                |
| Haiti                            | 0.1 (0.0 to 0.1)           | 0.1 (0.0 to 0.1)           | 0.1 (0.0 to 0.1)           | 0.2 (0.1 to 0.3)           | 3.6 (0.3 to 6.9)                               | 76.8 (3.9 to 183.0)                 |
| Jamaica                          | 0.2 (0.1 to 0.4)           | 0.3 (0.2 to 0.6)           | 0.3 (0.2 to 0.6)           | 0.5 (0.2 to 1.1)           | 2.4 (-1.0 to 5.9)                              | 49.1 (-13.5 to 141.3)               |
| Puerto Rico                      | 0.3 (0.2 to 0.6)           | 0.5 (0.2 to 0.8)           | 0.5 (0.2 to 0.8)           | 0.7 (0.2 to 1.5)           | 1.9 (-1.8 to 5.5)                              | 37.1 (-23.3 to 129.4)               |
| Saint Lucia                      | 0.2 (0.1 to 0.3)           | 0.3 (0.2 to 0.6)           | 0.3 (0.2 to 0.6)           | 0.6 (0.2 to 1.2)           | 3.1 (-0.5 to 6.7)                              | 66.2 (-6.7 to 173.5)                |
| Saint Vincent and the Grenadines | 0.1 (0.1 to 0.2)           | 0.2 (0.1 to 0.4)           | 0.3 (0.1 to 0.5)           | 0.4 (0.1 to 0.9)           | 3.1 (-0.2 to 7.0)                              | 66.3 (-3.4 to 184.0)                |
| Suriname                         | 0.2 (0.1 to 0.3)           | 0.3 (0.1 to 0.5)           | 0.3 (0.2 to 0.5)           | 0.5 (0.2 to 1.0)           | 3.1 (-0.5 to 6.4)                              | 64.0 (-7.2 to 162.9)                |
| Trinidad and Tobago              | 0.1 (0.1 to 0.1)           | 0.1 (0.1 to 0.3)           | 0.1 (0.1 to 0.3)           | 0.2 (0.1 to 0.5)           | 1.5 (-1.4 to 4.8)                              | 28.3 (-19.4 to 105.2)               |
| Virgin Islands, U.S.             | 0.5 (0.2 to 0.8)           | 0.6 (0.3 to 1.0)           | 0.6 (0.3 to 1.0)           | 0.8 (0.3 to 1.8)           | 1.5 (-1.7 to 5.0)                              | 29.2 (-22.6 to 111.5)               |
| Central Latin America            |                            |                            |                            |                            |                                                |                                     |
| Colombia                         | 0.1 (0.0 to 0.1)           | 0.1 (0.1 to 0.3)           | 0.2 (0.1 to 0.3)           | 0.3 (0.1 to 0.6)           | 3.6 (0.2 to 7.0)                               | 78.5 (2.5 to 187.3)                 |
| Costa Rica                       | 0.5 (0.4 to 0.6)           | 0.6 (0.4 to 0.8)           | 0.6 (0.4 to 0.9)           | 0.7 (0.3 to 1.5)           | 1.4 (-1.4 to 4.1)                              | 25.7 (-19.1 to 85.1)                |
| El Salvador                      | 0.0 (0.0 to 0.1)           | 0.1 (0.0 to 0.1)           | 0.1 (0.0 to 0.1)           | 0.1 (0.0 to 0.1)           | 4.0 (0.7 to 7.2)                               | 88.6 (11.3 to 194.3)                |
| Guatemala                        | 0.0 (0.0 to 0.1)           | 0.1 (0.1 to 0.1)           | 0.1 (0.1 to 0.1)           | 0.2 (0.1 to 0.4)           | 4.0 (0.3 to 7.5)                               | 89.1 (5.3 to 208.6)                 |
| Honduras                         | 0.0 (0.0 to 0.0)           | 0.0 (0.0 to 0.0)           | 0.0 (0.0 to 0.0)           | 0.0 (0.0 to 0.0)           | 3.4 (-0.2 to 7.2)                              | 74.3 (-3.0 to 196.7)                |
| Mexico                           | 0.1 (0.0 to 0.1)           | 0.1 (0.1 to 0.2)           | 0.1 (0.1 to 0.2)           | 0.2 (0.1 to 0.5)           | 3.9 (0.7 to 6.8)                               | 85.3 (11.6 to 178.4)                |
| Nicaragua                        | 0.1 (0.0 to 0.1)           | 0.1 (0.1 to 0.2)           | 0.1 (0.1 to 0.2)           | 0.2 (0.1 to 0.4)           | 4.2 (1.1 to 7.3)                               | 92.9 (17.2 to 198.1)                |
| Panama                           | 0.1 (0.1 to 0.1)           | 0.1 (0.1 to 0.2)           | 0.1 (0.1 to 0.2)           | 0.2 (0.1 to 0.5)           | 3.1 (-0.2 to 6.3)                              | 64.1 (-3.1 to 159.0)                |

|                                               | Estimate in 2000 (95% UIs) | Estimate in 2015 (95% UIs) | Estimate in 2017 (95% UIs) | Estimate in 2020 (95% UIs) | Annualised rate of change, 2015-2020 (95% UIs) | Percent change, 2015-2020 (95% UIs) |
|-----------------------------------------------|----------------------------|----------------------------|----------------------------|----------------------------|------------------------------------------------|-------------------------------------|
| Venezuela                                     | 0.1 (0.0 to 0.1)           | 0.1 (0.0 to 0.1)           | 0.1 (0.0 to 0.1)           | 0.1 (0.0 to 0.2)           | 0.5 (-2.5 to 3.9)                              | 10.3 (-31.0 to 80.1)                |
| <b>Tropical Latin America</b>                 |                            |                            |                            |                            |                                                |                                     |
| Brazil                                        | 0.2 (0.1 to 0.3)           | 0.5 (0.4 to 0.6)           | 0.5 (0.3 to 0.7)           | 0.8 (0.4 to 1.6)           | 3.6 (0.5 to 6.8)                               | 75.6 (7.0 to 178.6)                 |
| Paraguay                                      | 0.1 (0.1 to 0.1)           | 0.1 (0.1 to 0.2)           | 0.1 (0.1 to 0.2)           | 0.2 (0.1 to 0.3)           | 2.4 (-0.8 to 5.7)                              | 48.4 (-10.7 to 134.1)               |
| <b>North Africa and Middle East</b>           |                            |                            |                            |                            |                                                |                                     |
| <b>North Africa and Middle East</b>           |                            |                            |                            |                            |                                                |                                     |
| Afghanistan                                   | 0.1 (0.0 to 0.1)           | 0.1 (0.1 to 0.1)           | 0.1 (0.1 to 0.2)           | 0.2 (0.1 to 0.4)           | 4.0 (0.4 to 7.3)                               | 87.4 (6.8 to 198.1)                 |
| Algeria                                       | 0.3 (0.2 to 0.6)           | 0.7 (0.4 to 1.1)           | 1.7 (0.9 to 2.9)           | 1.7 (0.5 to 4.2)           | 4.2 (0.6 to 7.4)                               | 94.4 (9.9 to 201.3)                 |
| Bahrain                                       | 1.1 (0.6 to 1.8)           | 1.8 (0.9 to 3.0)           | 1.8 (1.0 to 3.1)           | 2.8 (1.0 to 6.2)           | 2.6 (-0.7 to 6.1)                              | 52.6 (-9.4 to 149.5)                |
| Egypt                                         | 0.4 (0.2 to 0.6)           | 0.5 (0.3 to 0.6)           | 0.6 (0.5 to 0.7)           | 0.8 (0.5 to 1.3)           | 2.7 (0.1 to 5.5)                               | 53.3 (0.9 to 128.7)                 |
| Iran                                          | 0.2 (0.1 to 0.3)           | 0.4 (0.3 to 0.6)           | 0.5 (0.3 to 0.7)           | 0.8 (0.3 to 1.7)           | 4.1 (0.9 to 6.9)                               | 90.4 (14.9 to 183.2)                |
| Iraq                                          | 0.1 (0.1 to 0.2)           | 0.2 (0.1 to 0.3)           | 0.2 (0.2 to 0.4)           | 0.4 (0.2 to 0.9)           | 3.5 (0.1 to 7.2)                               | 75.7 (1.7 to 192.9)                 |
| Jordan                                        | 0.8 (0.6 to 0.9)           | 1.1 (0.7 to 1.7)           | 1.1 (0.7 to 1.8)           | 1.7 (0.7 to 5.4)           | 2.3 (-0.7 to 5.4)                              | 45.3 (-9.9 to 123.7)                |
| Kuwait                                        | 1.4 (0.7 to 2.3)           | 2.2 (1.1 to 3.7)           | 2.3 (1.2 to 3.9)           | 3.5 (1.3 to 7.2)           | 2.8 (-0.5 to 6.1)                              | 58.0 (-7.8 to 150.1)                |
| Lebanon                                       | 0.5 (0.3 to 0.9)           | 0.9 (0.5 to 1.6)           | 1.0 (0.5 to 1.7)           | 1.6 (0.6 to 3.4)           | 3.4 (0.1 to 6.7)                               | 72.4 (1.6 to 174.0)                 |
| Libya                                         | 0.8 (0.5 to 1.4)           | 0.9 (0.5 to 1.6)           | 1.0 (0.5 to 1.6)           | 1.2 (0.5 to 2.5)           | 1.3 (-1.3 to 4.4)                              | 24.4 (-17.8 to 92.3)                |
| Morocco                                       | 0.2 (0.1 to 0.4)           | 0.4 (0.2 to 0.7)           | 0.4 (0.2 to 0.7)           | 0.8 (0.3 to 1.7)           | 4.1 (0.5 to 7.3)                               | 89.9 (8.5 to 199.6)                 |
| Palestine                                     | 0.2 (0.1 to 0.3)           | 0.3 (0.1 to 0.5)           | 0.3 (0.2 to 0.6)           | 0.6 (0.2 to 1.2)           | 4.2 (0.4 to 7.6)                               | 94.1 (6.9 to 211.3)                 |
| Oman                                          | 0.6 (0.3 to 0.9)           | 1.4 (0.8 to 2.4)           | 1.5 (0.8 to 2.6)           | 3.2 (1.3 to 7.9)           | 5.1 (2.0 to 7.9)                               | 121.9 (34.0 to 227.2)               |
| Qatar                                         | 1.7 (0.9 to 2.9)           | 2.7 (1.4 to 4.6)           | 2.8 (1.4 to 4.7)           | 4.2 (1.4 to 8.7)           | 2.4 (-1.0 to 5.8)                              | 49.3 (-14.0 to 139.6)               |
| Saudi Arabia                                  | 0.6 (0.3 to 1.0)           | 1.5 (0.8 to 2.6)           | 1.7 (0.9 to 2.9)           | 3.9 (1.5 to 8.0)           | 6.0 (2.5 to 8.9)                               | 131.5 (45.7 to 277.9)               |
| Sudan                                         | 0.1 (0.1 to 0.1)           | 0.2 (0.1 to 0.4)           | 0.2 (0.1 to 0.4)           | 0.5 (0.2 to 1.0)           | 5.0 (1.7 to 8.2)                               | 117.6 (29.3 to 242.5)               |
| Syria                                         | 0.2 (0.1 to 0.4)           | 0.3 (0.2 to 0.6)           | 0.4 (0.2 to 0.6)           | 0.6 (0.2 to 1.2)           | 2.9 (-0.4 to 6.2)                              | 60.5 (-5.4 to 153.9)                |
| Tunisia                                       | 0.3 (0.2 to 0.5)           | 0.6 (0.3 to 1.0)           | 0.6 (0.3 to 1.1)           | 1.1 (0.4 to 2.5)           | 3.4 (0.1 to 6.9)                               | 72.6 (1.2 to 180.3)                 |
| Turkey                                        | 0.1 (0.1 to 0.2)           | 0.2 (0.1 to 0.3)           | 0.2 (0.1 to 0.4)           | 0.4 (0.2 to 0.9)           | 4.3 (1.0 to 7.5)                               | 96.1 (16.3 to 210.1)                |
| United Arab Emirates                          | 1.7 (0.9 to 3.0)           | 2.7 (1.5 to 4.6)           | 2.7 (1.5 to 4.6)           | 4.0 (1.6 to 8.3)           | 2.3 (-0.8 to 5.6)                              | 45.7 (-11.4 to 130.2)               |
| Yemen                                         | 0.1 (0.1 to 0.1)           | 0.2 (0.1 to 0.3)           | 0.2 (0.1 to 0.3)           | 0.3 (0.1 to 0.6)           | 3.0 (-0.3 to 6.2)                              | 61.9 (-4.0 to 154.0)                |
| <b>South Asia</b>                             |                            |                            |                            |                            |                                                |                                     |
| <b>South Asia</b>                             |                            |                            |                            |                            |                                                |                                     |
| Bangladesh                                    | 0.1 (0.1 to 0.1)           | 0.2 (0.1 to 0.3)           | 0.2 (0.1 to 0.3)           | 0.3 (0.1 to 0.8)           | 4.5 (1.0 to 7.7)                               | 102.0 (15.3 to 219.7)               |
| Bhutan                                        | 0.2 (0.1 to 0.3)           | 0.4 (0.2 to 0.6)           | 0.4 (0.2 to 0.7)           | 0.8 (0.3 to 1.7)           | 5.0 (1.8 to 8.3)                               | 119.6 (30.1 to 244.9)               |
| India                                         | 0.1 (0.1 to 0.1)           | 0.2 (0.1 to 0.3)           | 0.2 (0.1 to 0.3)           | 0.4 (0.1 to 0.8)           | 4.9 (1.6 to 7.9)                               | 115.5 (27.7 to 227.3)               |
| Nepal                                         | 0.1 (0.1 to 0.1)           | 0.2 (0.1 to 0.3)           | 0.2 (0.1 to 0.3)           | 0.4 (0.1 to 0.9)           | 5.0 (1.7 to 8.2)                               | 120.3 (28.2 to 243.5)               |
| Pakistan                                      | 0.1 (0.0 to 0.1)           | 0.2 (0.1 to 0.3)           | 0.2 (0.1 to 0.3)           | 0.3 (0.1 to 0.7)           | 4.5 (1.1 to 7.8)                               | 103.9 (17.9 to 220.1)               |
| <b>Southeast Asia, East Asia, and Oceania</b> |                            |                            |                            |                            |                                                |                                     |
| <b>East Asia</b>                              |                            |                            |                            |                            |                                                |                                     |
| China                                         | 0.3 (0.2 to 0.4)           | 0.6 (0.3 to 0.9)           | 0.6 (0.3 to 0.9)           | 1.1 (0.4 to 2.3)           | 4.2 (1.2 to 7.4)                               | 93.3 (18.9 to 204.6)                |
| North Korea                                   | 0.1 (0.1 to 0.2)           | 0.1 (0.1 to 0.2)           | 0.1 (0.1 to 0.2)           | 0.2 (0.1 to 0.4)           | 1.7 (-1.6 to 5.4)                              | 34.0 (-21.9 to 125.0)               |
| Taiwan (Province of China)                    | 0.4 (0.2 to 0.7)           | 0.7 (0.4 to 1.0)           | 0.7 (0.4 to 1.0)           | 1.0 (0.4 to 2.0)           | 2.3 (-0.8 to 5.6)                              | 45.7 (-11.9 to 133.1)               |
| <b>Oceania</b>                                |                            |                            |                            |                            |                                                |                                     |
| American Samoa                                | 0.3 (0.2 to 0.6)           | 0.4 (0.2 to 0.7)           | 0.4 (0.2 to 0.7)           | 0.5 (0.2 to 1.1)           | 1.7 (-1.6 to 5.0)                              | 33.3 (-21.6 to 111.6)               |
| Federated States of Micronesia                | 0.1 (0.1 to 0.2)           | 0.2 (0.1 to 0.3)           | 0.2 (0.1 to 0.3)           | 0.2 (0.1 to 0.5)           | 2.0 (0.3 to 4.2)                               | 37.1 (-4.6 to 88.9)                 |
| Fiji                                          | 0.2 (0.1 to 0.4)           | 0.3 (0.1 to 0.5)           | 0.3 (0.2 to 0.5)           | 0.4 (0.1 to 0.9)           | 1.8 (-1.5 to 5.3)                              | 36.1 (-19.7 to 120.3)               |
| Guam                                          | 0.6 (0.3 to 1.1)           | 0.7 (0.4 to 1.3)           | 0.7 (0.4 to 1.3)           | 0.9 (0.3 to 2.0)           | 0.9 (-2.3 to 4.2)                              | 18.5 (-29.2 to 87.2)                |
| Kiribati                                      | 0.0 (0.0 to 0.1)           | 0.1 (0.0 to 0.1)           | 0.1 (0.0 to 0.1)           | 0.1 (0.0 to 0.2)           | 3.3 (-0.3 to 7.0)                              | 70.3 (-4.3 to 184.2)                |
| Marshall Islands                              | 0.1 (0.1 to 0.2)           | 0.1 (0.1 to 0.3)           | 0.2 (0.1 to 0.3)           | 0.3 (0.1 to 0.6)           | 3.4 (0.1 to 6.9)                               | 73.9 (0.9 to 182.9)                 |
| Northern Mariana Islands                      | 0.7 (0.4 to 1.2)           | 0.6 (0.3 to 1.1)           | 0.7 (0.3 to 1.1)           | 0.7 (0.3 to 1.5)           | 0.5 (-2.6 to 3.9)                              | 10.6 (-32.4 to 79.2)                |
| Papua New Guinea                              | 0.1 (0.0 to 0.1)           | 0.1 (0.0 to 0.1)           | 0.1 (0.0 to 0.1)           | 0.1 (0.0 to 0.2)           | 2.2 (-1.1 to 5.8)                              | 44.8 (-14.9 to 137.1)               |
| Samoa                                         | 0.1 (0.1 to 0.2)           | 0.1 (0.1 to 0.2)           | 0.1 (0.1 to 0.2)           | 0.1 (0.1 to 0.3)           | 0.2 (-2.5 to 3.3)                              | 5.6 (-31.5 to 64.6)                 |
| Solomon Islands                               | 0.0 (0.0 to 0.1)           | 0.1 (0.0 to 0.1)           | 0.1 (0.0 to 0.1)           | 0.1 (0.0 to 0.2)           | 3.1 (-0.4 to 6.5)                              | 63.9 (-6.4 to 163.7)                |
| Tonga                                         | 0.2 (0.1 to 0.3)           | 0.2 (0.1 to 0.4)           | 0.2 (0.1 to 0.4)           | 0.2 (0.1 to 0.7)           | 2.3 (-1.0 to 5.6)                              | 46.1 (-13.3 to 130.6)               |
| Vanuatu                                       | 0.1 (0.1 to 0.1)           | 0.1 (0.1 to 0.2)           | 0.1 (0.1 to 0.2)           | 0.2 (0.1 to 0.5)           | 2.5 (-0.8 to 5.8)                              | 51.2 (-10.7 to 137.5)               |
| <b>Southeast Asia</b>                         |                            |                            |                            |                            |                                                |                                     |
| Cambodia                                      | 0.1 (0.0 to 0.1)           | 0.1 (0.1 to 0.2)           | 0.2 (0.1 to 0.3)           | 0.3 (0.1 to 0.7)           | 5.0 (1.7 to 8.2)                               | 117.4 (28.8 to 242.3)               |
| Indonesia                                     | 0.1 (0.0 to 0.1)           | 0.1 (0.1 to 0.2)           | 0.2 (0.1 to 0.3)           | 0.3 (0.1 to 0.7)           | 4.1 (0.8 to 7.6)                               | 90.4 (13.0 to 212.1)                |
| Laos                                          | 0.1 (0.0 to 0.1)           | 0.2 (0.1 to 0.3)           | 0.2 (0.1 to 0.3)           | 0.4 (0.1 to 0.8)           | 5.2 (1.8 to 8.3)                               | 124.1 (31.3 to 247.5)               |
| Malaysia                                      | 0.2 (0.1 to 0.2)           | 0.3 (0.2 to 0.6)           | 0.4 (0.2 to 0.6)           | 0.7 (0.2 to 1.6)           | 4.1 (0.6 to 7.3)                               | 89.7 (9.6 to 199.5)                 |
| Maldives                                      | 0.1 (0.1 to 0.3)           | 0.4 (0.2 to 0.7)           | 0.5 (0.2 to 0.8)           | 1.2 (0.4 to 2.5)           | 6.6 (2.9 to 9.5)                               | 176.3 (55.1 to 312.7)               |
| Mauritius                                     | 0.3 (0.1 to 0.5)           | 0.5 (0.3 to 0.8)           | 0.5 (0.3 to 0.9)           | 0.9 (0.3 to 1.9)           | 3.5 (0.1 to 6.9)                               | 75.4 (1.5 to 181.5)                 |
| Myanmar                                       | 0.1 (0.0 to 0.1)           | 0.2 (0.1 to 0.4)           | 0.2 (0.1 to 0.4)           | 0.6 (0.2 to 1.2)           | 6.6 (3.6 to 9.1)                               | 173.4 (70.6 to 289.6)               |
| Philippines                                   | 0.4 (0.3 to 0.5)           | 0.4 (0.2 to 0.5)           | 0.4 (0.2 to 0.6)           | 0.4 (0.2 to 0.9)           | 1.0 (-1.7 to 3.9)                              | 19.6 (-22.1 to 78.8)                |
| Sri Lanka                                     | 0.2 (0.1 to 0.3)           | 0.3 (0.2 to 0.6)           | 0.3 (0.2 to 0.6)           | 0.5 (0.2 to 1.3)           | 3.9 (0.3 to 7.2)                               | 86.0 (5.4 to 196.6)                 |
| Seychelles                                    | 0.3 (0.2 to 0.6)           | 0.5 (0.3 to 0.9)           | 0.5 (0.3 to 0.9)           | 0.8 (0.3 to 1.9)           | 3.0 (-0.5 to 6.5)                              | 61.4 (-7.0 to 165.2)                |
| Thailand                                      | 0.1 (0.1 to 0.2)           | 0.2 (0.1 to 0.3)           | 0.2 (0.1 to 0.3)           | 0.3 (0.1 to 0.7)           | 3.3 (-0.2 to 6.8)                              | 71.1 (-2.4 to 177.0)                |
| Timor-Leste                                   | 0.1 (0.0 to 0.1)           | 0.1 (0.1 to 0.2)           | 0.1 (0.1 to 0.2)           | 0.3 (0.1 to 0.6)           | 4.5 (1.4 to 7.5)                               | 102.8 (23.6 to 210.0)               |
| Vietnam                                       | 0.1 (0.1 to 0.2)           | 0.2 (0.1 to 0.4)           | 0.3 (0.1 to 0.5)           | 0.5 (0.2 to 1.2)           | 4.6 (1.3 to 8.0)                               | 107.4 (21.2 to 234.4)               |
| <b>Sub-Saharan Africa</b>                     |                            |                            |                            |                            |                                                |                                     |
| <b>Central Sub-Saharan Africa</b>             |                            |                            |                            |                            |                                                |                                     |
| Angola                                        | 0.0 (0.0 to 0.0)           | 0.1 (0.0 to 0.1)           | 0.1 (0.0 to 0.1)           | 0.2 (0.1 to 0.4)           | 6.4 (3.2 to 9.2)                               | 167.2 (62.6 to 298.4)               |
| Central African Republic                      | 0.0 (0.0 to 0.0)           | 0.0 (0.0 to 0.1)           | 0.0 (0.0 to 0.1)           | 0.1 (0.0 to 0.1)           | 29.9 (-0.5 to 6.3)                             | 60.2 (-7.0 to 155.7)                |
| Congo                                         | 0.1 (0.0 to 0.1)           | 0.1 (0.1 to 0.2)           | 0.1 (0.1 to 0.3)           | 0.3 (0.1 to 0.7)           | 4.7 (1.3 to 7.9)                               | 109.3 (21.2 to 226.3)               |
| Democratic Republic of the Congo              | 0.0 (0.0 to 0.0)           | 0.0 (0.0 to 0.1)           | 0.0 (0.0 to 0.1)           | 0.1 (0.0 to 0.1)           | 4.1 (0.9 to 6.8)                               | 90.2 (13.7 to 179.2)                |
| Equatorial Guinea                             | 0.0 (0.0 to 0.1)           | 0.1 (0.1 to 0.2)           | 0.1 (0.1 to 0.3)           | 0.5 (0.2 to 0.9)           | 7.7 (4.5 to 10.2)                              | 224.1 (95.9 to 360.5)               |
| Gabon                                         | 0.1 (0.0 to 0.2)           | 0.2 (0.1 to 0.3)           | 0.2 (0.1 to 0.3)           | 0.4 (0.1 to 0.8)           | 4.8 (1.3 to 8.2)                               | 114.5 (21.3 to 242.9)               |
| <b>Eastern Sub-Saharan Africa</b>             |                            |                            |                            |                            |                                                |                                     |
| Burundi                                       | 0.0 (0.0 to 0.1)           | 0.0 (0.0 to 0.1)           | 0.0 (0.0 to 0.1)           | 0.1 (0.0 to 0.1)           | 2.3 (-1.2 to 6.0)                              | 45.4 (-16.4 to 144.6)               |
| Comoros                                       | 0.0 (0.0 to 0.1)           | 0.1 (0.0 to 0.1)           | 0.1 (0.0 to 0.1)           | 0.2 (0.1 to 0.3)           | 4.0 (0.4 to 7.5)                               | 88.5 (6.8 to 207.6)                 |
| Djibouti                                      | 0.0 (0.0 to 0.1)           | 0.1 (0.0 to 0.1)           | 0.1 (0.0 to 0.1)           | 0.2 (0.1 to 0.4)           | 5.0 (1.4 to 8.2)                               | 118.7 (23.0 to 243.8)               |
| Eritrea                                       | 0.0 (0.0 to 0.1)           | 0.1 (0.0 to 0.1)           | 0.1 (0.0 to 0.1)           | 0.1 (0.0 to 0.2)           | 3.4 (0.2 to 6.6)                               | 71.9 (3.8 to 167.8)                 |
| Ethiopia                                      | 0.0 (0.0 to 0.0)           | 0.0 (0.0 to 0.0)           | 0.0 (0.0 to 0.1)           | 0.1 (0.0 to 0.1)           | 6.4 (3.3 to 8.9)                               | 166.2 (63.8 to 277.9)               |

|                                                          | Estimate in 2000 (95% UIs) | Estimate in 2015 (95% UIs) | Estimate in 2017 (95% UIs) | Estimate in 2020 (95% UIs) | Annualised rate of change, 2015-2020 (95% UIs) | Percent change, 2015-2020 (95% UIs) |
|----------------------------------------------------------|----------------------------|----------------------------|----------------------------|----------------------------|------------------------------------------------|-------------------------------------|
| Kenya                                                    | 0.1 (0.0 to 0.1)           | 0.1 (0.1 to 0.2)           | 0.1 (0.1 to 0.2)           | 0.2 (0.1 to 0.5)           | 3.5 (-0.0 to 7.0)                              | 76.0 (-0.4 to 185.4)                |
| Madagascar                                               | 0.0 (0.0 to 0.1)           | 0.1 (0.0 to 0.1)           | 0.1 (0.0 to 0.1)           | 0.1 (0.0 to 0.2)           | 2.2 (-1.1 to 5.5)                              | 44.1 (-15.3 to 129.0)               |
| Malawi                                                   | 0.0 (0.0 to 0.0)           | 0.1 (0.0 to 0.1)           | 0.1 (0.0 to 0.1)           | 0.1 (0.0 to 0.2)           | 4.0 (0.6 to 7.2)                               | 88.6 (10.0 to 195.0)                |
| Mozambique                                               | 0.0 (0.0 to 0.0)           | 0.0 (0.0 to 0.0)           | 0.0 (0.0 to 0.0)           | 0.0 (0.0 to 0.0)           | 5.0 (1.7 to 8.2)                               | 118.3 (29.5 to 240.9)               |
| Rwanda                                                   | 0.0 (0.0 to 0.0)           | 0.1 (0.1 to 0.1)           | 0.1 (0.1 to 0.1)           | 0.2 (0.1 to 0.4)           | 5.1 (2.2 to 8.0)                               | 119.7 (38.2 to 233.4)               |
| Somalia                                                  | 0.0 (0.0 to 0.0)           | 0.0 (0.0 to 0.1)           | 0.0 (0.0 to 0.1)           | 0.1 (0.0 to 0.1)           | 3.2 (-0.5 to 6.7)                              | 67.0 (-6.9 to 172.2)                |
| South Sudan                                              | 0.0 (0.0 to 0.0)           | 0.0 (0.0 to 0.1)           | 0.0 (0.0 to 0.1)           | 0.1 (0.0 to 0.1)           | 3.0 (-0.6 to 6.3)                              | 63.9 (-9.0 to 158.8)                |
| Tanzania                                                 | 0.1 (0.0 to 0.1)           | 0.1 (0.1 to 0.1)           | 0.1 (0.1 to 0.2)           | 0.2 (0.1 to 0.2)           | 4.4 (1.0 to 7.6)                               | 101.0 (16.5 to 211.0)               |
| Uganda                                                   | 0.0 (0.0 to 0.0)           | 0.0 (0.0 to 0.0)           | 0.0 (0.0 to 0.0)           | 0.0 (0.0 to 0.1)           | 3.8 (0.6 to 7.1)                               | 82.7 (9.5 to 189.7)                 |
| Zambia                                                   | 0.1 (0.1 to 0.1)           | 0.3 (0.2 to 0.4)           | 0.3 (0.2 to 0.4)           | 0.8 (0.4 to 1.4)           | 5.9 (2.9 to 8.8)                               | 149.0 (55.1 to 274.7)               |
| <b>Southern Sub-Saharan Africa</b>                       |                            |                            |                            |                            |                                                |                                     |
| Botswana                                                 | 0.1 (0.1 to 0.2)           | 0.2 (0.1 to 0.3)           | 0.2 (0.1 to 0.4)           | 0.5 (0.2 to 1.1)           | 4.5 (0.8 to 8.1)                               | 103.6 (12.7 to 238.2)               |
| Lesotho                                                  | 0.1 (0.0 to 0.1)           | 0.1 (0.0 to 0.1)           | 0.1 (0.0 to 0.1)           | 0.1 (0.1 to 0.3)           | 3.6 (0.7 to 6.9)                               | 77.9 (11.3 to 181.7)                |
| Namibia                                                  | 0.2 (0.1 to 0.3)           | 0.3 (0.2 to 0.5)           | 0.3 (0.2 to 0.6)           | 0.7 (0.3 to 1.5)           | 4.7 (1.0 to 8.3)                               | 110.6 (15.4 to 247.7)               |
| South Africa                                             | 0.1 (0.1 to 0.2)           | 0.2 (0.1 to 0.2)           | 0.2 (0.1 to 0.3)           | 1.5 (-1.5 to 4.7)          | 1.5 (-1.5 to 4.7)                              | 28.2 (-19.7 to 102.5)               |
| Swaziland                                                | 0.1 (0.0 to 0.1)           | 0.1 (0.1 to 0.2)           | 0.1 (0.1 to 0.2)           | 0.2 (0.1 to 0.4)           | 3.0 (-0.4 to 6.2)                              | 62.7 (-6.2 to 154.3)                |
| Zimbabwe                                                 | 0.1 (0.1 to 0.2)           | 0.1 (0.1 to 0.2)           | 0.1 (0.1 to 0.2)           | 0.2 (0.1 to 0.3)           | 2.5 (-0.4 to 5.4)                              | 49.5 (-5.5 to 125.4)                |
| <b>Western Sub-Saharan Africa</b>                        |                            |                            |                            |                            |                                                |                                     |
| Benin                                                    | 0.1 (0.0 to 0.1)           | 0.1 (0.1 to 0.2)           | 0.1 (0.1 to 0.2)           | 0.2 (0.1 to 0.5)           | 4.6 (0.9 to 7.9)                               | 108.2 (13.6 to 228.9)               |
| Burkina Faso                                             | 0.0 (0.0 to 0.1)           | 0.1 (0.0 to 0.1)           | 0.1 (0.0 to 0.1)           | 0.1 (0.1 to 0.3)           | 4.0 (0.3 to 7.6)                               | 88.2 (3.9 to 214.5)                 |
| Cameroun                                                 | 0.2 (0.1 to 0.3)           | 0.4 (0.2 to 0.6)           | 0.4 (0.2 to 0.6)           | 0.8 (0.3 to 1.8)           | 5.0 (1.7 to 8.2)                               | 120.0 (29.2 to 242.0)               |
| Cape Verde                                               | 0.1 (0.1 to 0.2)           | 0.3 (0.1 to 0.5)           | 0.3 (0.2 to 0.6)           | 0.7 (0.3 to 1.5)           | 5.7 (2.3 to 9.0)                               | 143.5 (60.9 to 284.3)               |
| Chad                                                     | 0.0 (0.0 to 0.0)           | 0.0 (0.0 to 0.1)           | 0.0 (0.0 to 0.1)           | 0.1 (0.0 to 0.2)           | 4.5 (0.9 to 7.9)                               | 103.9 (14.5 to 228.8)               |
| Cote d'Ivoire                                            | 0.1 (0.0 to 0.2)           | 0.1 (0.1 to 0.3)           | 0.1 (0.1 to 0.3)           | 0.2 (0.1 to 0.6)           | 3.6 (-0.1 to 7.3)                              | 77.5 (-0.8 to 198.6)                |
| The Gambia                                               | 0.1 (0.0 to 0.1)           | 0.1 (0.1 to 0.2)           | 0.1 (0.1 to 0.2)           | 0.2 (0.1 to 0.5)           | 3.3 (-0.2 to 6.8)                              | 70.2 (-3.2 to 178.5)                |
| Ghana                                                    | 0.2 (0.1 to 0.3)           | 0.4 (0.2 to 0.6)           | 0.4 (0.3 to 0.7)           | 0.7 (0.3 to 1.5)           | 3.7 (0.1 to 7.1)                               | 79.1 (2.0 to 188.4)                 |
| Guinea                                                   | 0.1 (0.1 to 0.1)           | 0.1 (0.1 to 0.2)           | 0.1 (0.1 to 0.2)           | 0.2 (0.1 to 0.5)           | 3.6 (0.5 to 7.7)                               | 76.5 (7.3 to 174.1)                 |
| Guinea-Bissau                                            | 0.0 (0.0 to 0.1)           | 0.1 (0.0 to 0.1)           | 0.1 (0.0 to 0.1)           | 0.2 (0.1 to 0.2)           | 4.6 (1.1 to 7.9)                               | 106.3 (18.0 to 226.9)               |
| Liberia                                                  | 0.0 (0.0 to 0.1)           | 0.1 (0.0 to 0.1)           | 0.1 (0.0 to 0.1)           | 0.1 (0.1 to 0.3)           | 5.0 (2.4 to 7.7)                               | 114.8 (42.9 to 215.8)               |
| Mali                                                     | 0.0 (0.0 to 0.0)           | 0.0 (0.0 to 0.1)           | 0.1 (0.0 to 0.1)           | 0.1 (0.0 to 0.2)           | 4.0 (0.2 to 7.6)                               | 87.9 (2.8 to 212.7)                 |
| Mauritania                                               | 0.1 (0.0 to 0.1)           | 0.1 (0.1 to 0.2)           | 0.1 (0.1 to 0.2)           | 0.2 (0.1 to 0.5)           | 3.6 (0.3 to 6.8)                               | 78.1 (4.2 to 178.7)                 |
| Niger                                                    | 0.0 (0.0 to 0.0)           | 0.0 (0.0 to 0.1)           | 0.0 (0.0 to 0.1)           | 0.0 (0.0 to 0.1)           | 2.7 (-0.9 to 6.2)                              | 85.0 (-12.2 to 154.1)               |
| Nigeria                                                  | 0.1 (0.0 to 0.1)           | 0.1 (0.1 to 0.1)           | 0.1 (0.1 to 0.1)           | 0.2 (-1.0 to 0.7)          | 2.3 (-1.0 to 5.7)                              | 46.3 (-13.7 to 135.3)               |
| Sao Tome and Principe                                    | 0.1 (0.0 to 0.1)           | 0.2 (0.1 to 0.3)           | 0.2 (0.1 to 0.3)           | 0.4 (0.2 to 0.9)           | 6.4 (3.2 to 9.2)                               | 170.1 (60.7 to 296.2)               |
| Senegal                                                  | 0.1 (0.1 to 0.1)           | 0.1 (0.1 to 0.2)           | 0.1 (0.1 to 0.2)           | 0.2 (-0.8 to 0.7)          | 2.5 (-0.8 to 5.7)                              | 49.6 (-10.9 to 135.3)               |
| Sierra Leone                                             | 0.1 (0.0 to 0.1)           | 0.1 (0.1 to 0.2)           | 0.1 (0.1 to 0.2)           | 0.3 (0.1 to 0.6)           | 5.6 (1.9 to 8.6)                               | 138.8 (34.0 to 260.6)               |
| Togo                                                     | 0.1 (0.0 to 0.1)           | 0.1 (0.1 to 0.2)           | 0.1 (0.1 to 0.2)           | 0.3 (0.1 to 0.6)           | 4.1 (0.8 to 7.7)                               | 90.4 (12.7 to 215.3)                |
| <b>Indicator 3.c.1a: Physicians per 1,000 population</b> |                            |                            |                            |                            |                                                |                                     |
| <b>Central Europe, Eastern Europe, and Central Asia</b>  |                            |                            |                            |                            |                                                |                                     |
| <b>Central Asia</b>                                      |                            |                            |                            |                            |                                                |                                     |
| Armenia                                                  | 1.9 (1.2 to 2.9)           | 4.0 (2.9 to 5.5)           | 4.2 (2.9 to 6.0)           | 7.6 (3.5 to 13.7)          | 3.9 (0.8 to 6.8)                               | 85.4 (13.4 to 176.4)                |
| Azerbaijan                                               | 2.5 (1.4 to 4.0)           | 4.1 (2.8 to 8.1)           | 5.1 (2.8 to 8.3)           | 8.1 (3.1 to 17.0)          | 2.9 (0.0 to 5.9)                               | 59.2 (-0.4 to 140.9)                |
| Georgia                                                  | 5.1 (3.1 to 8.0)           | 7.8 (4.7 to 11.4)          | 8.2 (4.9 to 12.2)          | 12.1 (5.3 to 22.6)         | 2.6 (-0.4 to 5.4)                              | 51.7 (-5.6 to 124.3)                |
| Kazakhstan                                               | 3.0 (1.7 to 5.0)           | 5.3 (2.8 to 8.3)           | 5.5 (2.9 to 8.7)           | 8.4 (3.1 to 17.3)          | 2.8 (-0.4 to 5.8)                              | 56.5 (-6.2 to 137.4)                |
| Kyrgyzstan                                               | 1.6 (0.9 to 2.6)           | 2.4 (1.3 to 3.8)           | 2.4 (1.3 to 3.9)           | 3.2 (1.2 to 6.7)           | 1.7 (-1.5 to 5.0)                              | 34.0 (-19.6 to 110.2)               |
| Mongolia                                                 | 2.2 (1.6 to 2.9)           | 4.5 (2.6 to 7.9)           | 4.7 (2.7 to 7.6)           | 8.8 (3.2 to 17.8)          | 4.0 (1.2 to 6.7)                               | 87.3 (19.0 to 173.1)                |
| Tajikistan                                               | 1.3 (0.8 to 2.0)           | 2.6 (1.6 to 4.0)           | 2.8 (1.7 to 4.3)           | 4.9 (2.0 to 9.7)           | 3.8 (0.7 to 6.7)                               | 82.0 (11.0 to 174.0)                |
| Turkmenistan                                             | 2.1 (1.2 to 3.5)           | 3.7 (2.0 to 6.1)           | 3.9 (2.1 to 6.2)           | 6.3 (2.4 to 12.4)          | 3.2 (-0.0 to 6.1)                              | 65.5 (-0.1 to 150.2)                |
| Uzbekistan                                               | 1.5 (0.8 to 2.5)           | 2.9 (1.6 to 4.7)           | 3.1 (1.7 to 5.0)           | 5.5 (2.0 to 10.8)          | 3.9 (0.8 to 6.9)                               | 85.2 (12.3 to 183.0)                |
| <b>Central Europe</b>                                    |                            |                            |                            |                            |                                                |                                     |
| Albania                                                  | 0.7 (0.5 to 1.1)           | 1.1 (0.8 to 1.6)           | 1.2 (0.8 to 1.8)           | 1.8 (0.8 to 3.5)           | 2.6 (-0.6 to 5.7)                              | 52.2 (-8.2 to 134.2)                |
| Bosnia and Herzegovina                                   | 0.6 (0.3 to 1.1)           | 0.8 (0.4 to 1.4)           | 0.9 (0.5 to 1.6)           | 1.4 (0.5 to 3.0)           | 2.8 (-0.5 to 6.5)                              | 57.1 (-7.2 to 163.9)                |
| Bulgaria                                                 | 1.2 (0.7 to 1.9)           | 1.8 (1.0 to 3.0)           | 1.9 (1.1 to 3.0)           | 2.6 (1.0 to 5.3)           | 2.1 (-1.0 to 5.3)                              | 40.3 (-14.3 to 121.0)               |
| Croatia                                                  | 1.8 (1.3 to 2.2)           | 2.6 (2.2 to 3.1)           | 2.7 (2.2 to 3.4)           | 3.9 (2.5 to 5.9)           | 2.5 (0.5 to 4.6)                               | 47.7 (8.2 to 100.3)                 |
| Czech Republic                                           | 2.0 (1.7 to 2.4)           | 3.1 (2.5 to 3.7)           | 3.2 (2.5 to 4.0)           | 4.5 (2.8 to 6.7)           | 2.3 (0.4 to 4.2)                               | 43.8 (6.4 to 88.8)                  |
| Hungary                                                  | 1.4 (1.2 to 1.6)           | 1.5 (1.2 to 1.8)           | 1.4 (1.1 to 1.8)           | 1.5 (1.0 to 2.2)           | -0.1 (-1.7 to 1.8)                             | 0.1 (-22.1 to 31.4)                 |
| Macedonia                                                | 0.7 (0.4 to 1.2)           | 1.2 (0.6 to 2.1)           | 1.3 (0.7 to 2.2)           | 2.0 (0.7 to 4.2)           | 2.8 (-0.5 to 6.3)                              | 57.2 (-7.6 to 158.5)                |
| Montenegro                                               | 1.0 (0.5 to 1.7)           | 1.3 (0.7 to 2.3)           | 1.4 (0.7 to 2.4)           | 1.9 (0.7 to 4.2)           | 1.9 (-1.6 to 5.4)                              | 36.6 (-21.3 to 125.5)               |
| Poland                                                   | 1.3 (0.8 to 1.9)           | 1.6 (1.1 to 2.5)           | 1.7 (1.0 to 2.6)           | 2.2 (0.9 to 4.3)           | 1.4 (-1.4 to 4.3)                              | 27.5 (-19.4 to 90.0)                |
| Romania                                                  | 1.4 (1.2 to 1.8)           | 1.5 (1.3 to 1.8)           | 1.5 (1.2 to 1.9)           | 1.6 (1.1 to 2.3)           | 0.1 (-1.8 to 2.0)                              | 1.8 (-23.3 to 34.0)                 |
| Serbia                                                   | 0.3 (0.1 to 0.5)           | 0.4 (0.2 to 0.7)           | 0.4 (0.2 to 0.8)           | 0.6 (0.2 to 1.4)           | 2.0 (-1.5 to 5.6)                              | 40.9 (-19.8 to 130.6)               |
| Slovakia                                                 | 1.7 (1.4 to 2.1)           | 3.0 (2.5 to 3.5)           | 3.0 (2.4 to 3.8)           | 4.5 (2.9 to 7.6)           | 2.6 (0.5 to 4.6)                               | 50.1 (8.2 to 98.9)                  |
| Slovenia                                                 | 1.1 (0.8 to 1.7)           | 1.9 (1.3 to 2.7)           | 1.9 (1.2 to 2.8)           | 3.0 (1.4 to 5.6)           | 2.5 (-0.2 to 5.5)                              | 50.1 (-3.5 to 128.2)                |
| <b>Eastern Europe</b>                                    |                            |                            |                            |                            |                                                |                                     |
| Belarus                                                  | 1.7 (1.0 to 2.6)           | 3.0 (1.8 to 4.6)           | 3.1 (1.8 to 4.8)           | 5.0 (1.8 to 10.7)          | 2.9 (-0.8 to 6.4)                              | 60.1 (-10.9 to 160.6)               |
| Estonia                                                  | 2.5 (2.0 to 3.0)           | 2.9 (2.4 to 3.6)           | 2.9 (2.2 to 3.8)           | 3.3 (2.0 to 5.0)           | 0.7 (-1.4 to 2.9)                              | 11.8 (-19.5 to 54.1)                |
| Latvia                                                   | 2.5 (2.1 to 3.0)           | 2.9 (2.3 to 3.4)           | 3.0 (2.3 to 3.7)           | 3.3 (2.0 to 5.0)           | 0.8 (-1.3 to 2.7)                              | 14.0 (-17.3 to 49.7)                |
| Lithuania                                                | 2.3 (1.9 to 2.7)           | 2.9 (2.5 to 3.4)           | 2.9 (2.3 to 3.6)           | 3.7 (2.4 to 5.4)           | 1.5 (-0.5 to 3.5)                              | 26.1 (-6.7 to 67.9)                 |
| Moldova                                                  | 1.0 (0.5 to 1.6)           | 1.7 (0.9 to 2.7)           | 1.8 (0.9 to 2.8)           | 2.6 (1.0 to 5.4)           | 2.5 (-0.5 to 5.6)                              | 50.7 (-6.8 to 131.3)                |
| Russia                                                   | 3.4 (2.5 to 4.5)           | 4.8 (3.3 to 6.5)           | 4.8 (3.2 to 6.8)           | 6.2 (3.0 to 11.1)          | 1.4 (-1.3 to 4.0)                              | 26.7 (-17.1 to 83.3)                |
| Ukraine                                                  | 1.4 (0.8 to 2.4)           | 2.2 (1.3 to 3.7)           | 2.3 (1.3 to 3.9)           | 3.3 (1.3 to 7.2)           | 2.3 (-1.1 to 5.7)                              | 45.4 (-15.8 to 136.3)               |
| <b>High-income</b>                                       |                            |                            |                            |                            |                                                |                                     |
| <b>Australasia</b>                                       |                            |                            |                            |                            |                                                |                                     |
| Australia                                                | 2.5 (1.7 to 3.5)           | 3.0 (2.0 to 4.5)           | 3.0 (1.9 to 4.7)           | 3.8 (1.6 to 7.8)           | 1.2 (-1.6 to 4.0)                              | 23.4 (-21.8 to 83.5)                |
| New Zealand                                              | 2.8 (1.9 to 4.1)           | 4.5 (2.8 to 6.9)           | 4.6 (2.8 to 7.2)           | 6.8 (2.6 to 14.0)          | 2.3 (-0.8 to 5.4)                              | 45.7 (-10.8 to 123.8)               |
| <b>High-income Asia Pacific</b>                          |                            |                            |                            |                            |                                                |                                     |
| Brunei                                                   | 1.0 (0.5 to 1.7)           | 1.6 (0.8 to 2.9)           | 1.7 (0.9 to 3.0)           | 2.6 (0.9 to 6.2)           | 2.9 (-0.5 to 6.2)                              | 59.4 (-7.3 to 155.1)                |
| Japan                                                    | 1.1 (0.6 to 1.8)           | 1.1 (0.7 to 1.8)           | 1.1 (0.7 to 1.9)           | 1.3 (0.5 to 2.8)           | 0.3 (-2.8 to 3.6)                              | 8.3 (-34.6 to 72.5)                 |
| South Korea                                              | 0.6 (0.3 to 1.0)           | 1.1 (0.7 to 1.8)           | 1.1 (0.7 to 1.8)           | 2.0 (0.8 to 4.4)           | 3.7 (0.1 to 7.1)                               | 79.8 (1.4 to 188.9)                 |
| Singapore                                                | 1.1 (0.6 to 2.0)           | 2.0 (1.0 to 3.4)           | 2.0 (1.0 to 3.5)           | 3.2 (1.1 to 7.1)           | 2.9 (-0.3 to 6.3)                              | 58.6 (-4.8 to 158.6)                |

|                                     | Estimate in 2000 (95% UIs) | Estimate in 2015 (95% UIs) | Estimate in 2017 (95% UIs) | Estimate in 2020 (95% UIs) | Annualised rate of change, 2015-2020 (95% UIs) | Percent change, 2015-2020 (95% UIs) |
|-------------------------------------|----------------------------|----------------------------|----------------------------|----------------------------|------------------------------------------------|-------------------------------------|
| <b>High-income North America</b>    |                            |                            |                            |                            |                                                |                                     |
| Canada                              | 2.5 (1.6 to 3.7)           | 2.4 (1.3 to 4.0)           | 2.4 (1.3 to 4.1)           | 2.6 (1.0 to 5.7)           | 0.2 (-2.7 to 3.2)                              | 5.2 (-33.3 to 60.7)                 |
| Greenland                           | 1.3 (0.7 to 2.3)           | 1.7 (0.9 to 3.0)           | 1.7 (0.9 to 3.1)           | 2.2 (0.8 to 5.2)           | 1.4 (-1.9 to 4.7)                              | 27.4 (-24.9 to 103.4)               |
| United States                       | 2.0 (1.5 to 2.7)           | 2.3 (1.7 to 3.1)           | 2.3 (1.6 to 3.3)           | 2.6 (1.3 to 5.0)           | 0.6 (-2.0 to 3.3)                              | 12.4 (-26.3 to 63.8)                |
| <b>Southern Latin America</b>       |                            |                            |                            |                            |                                                |                                     |
| Argentina                           | 1.8 (1.0 to 2.9)           | 2.5 (1.4 to 3.8)           | 2.5 (1.4 to 4.0)           | 3.4 (1.3 to 7.3)           | 1.8 (-1.6 to 5.1)                              | 34.8 (-20.9 to 115.3)               |
| Chile                               | 1.0 (0.8 to 1.3)           | 1.2 (0.9 to 1.7)           | 1.3 (0.9 to 1.9)           | 1.7 (0.8 to 3.0)           | 1.7 (-0.8 to 4.0)                              | 30.4 (-11.0 to 83.5)                |
| Uruguay                             | 2.4 (1.8 to 3.0)           | 4.3 (3.0 to 5.9)           | 4.5 (3.2 to 6.4)           | 7.6 (3.9 to 13.4)          | 3.6 (1.1 to 6.0)                               | 73.8 (17.3 to 146.2)                |
| <b>Western Europe</b>               |                            |                            |                            |                            |                                                |                                     |
| Andorra                             | 4.1 (2.1 to 7.2)           | 4.6 (2.3 to 7.9)           | 4.7 (2.4 to 8.0)           | 5.5 (1.9 to 12.7)          | 0.8 (-2.4 to 4.4)                              | 17.3 (-30.3 to 93.0)                |
| Austria                             | 2.9 (2.3 to 3.6)           | 4.3 (3.2 to 5.4)           | 4.4 (3.2 to 5.9)           | 6.0 (3.3 to 10.4)          | 2.1 (-0.2 to 4.5)                              | 39.4 (-3.4 to 96.2)                 |
| Belgium                             | 3.1 (2.8 to 3.5)           | 3.1 (2.6 to 3.6)           | 3.1 (2.5 to 3.8)           | 3.2 (2.2 to 4.6)           | 0.1 (-1.5 to 1.8)                              | 1.8 (-20.4 to 31.7)                 |
| Cyprus                              | 2.4 (2.0 to 2.9)           | 3.3 (2.7 to 3.9)           | 3.5 (2.8 to 4.3)           | 4.8 (3.0 to 7.2)           | 2.3 (0.3 to 4.3)                               | 43.6 (5.2 to 90.6)                  |
| Denmark                             | 3.3 (2.8 to 3.8)           | 4.2 (3.4 to 5.2)           | 4.1 (3.1 to 5.2)           | 4.7 (2.9 to 7.2)           | 0.6 (-1.2 to 2.5)                              | 10.1 (-17.0 to 46.5)                |
| Finland                             | 3.7 (3.2 to 4.2)           | 3.2 (2.6 to 4.0)           | 3.3 (2.5 to 4.2)           | 3.2 (1.9 to 5.2)           | -0.2 (-2.2 to 1.9)                             | -2.4 (-27.8 to 33.1)                |
| France                              | 3.1 (2.8 to 3.5)           | 2.9 (2.4 to 3.4)           | 2.7 (2.1 to 3.3)           | 2.3 (1.7 to 3.4)           | -1.4 (-2.7 to 0.1)                             | -18.8 (-33.4 to 2.1)                |
| Germany                             | 3.5 (3.2 to 3.8)           | 4.7 (4.3 to 5.2)           | 4.9 (4.3 to 5.6)           | 6.3 (4.8 to 8.2)           | 1.9 (0.6 to 3.3)                               | 33.8 (9.6 to 64.7)                  |
| Greece                              | 3.9 (3.6 to 4.3)           | 4.0 (3.6 to 4.5)           | 4.0 (3.4 to 4.6)           | 4.1 (3.0 to 5.4)           | 0.1 (-1.3 to 1.4)                              | 1.3 (-17.8 to 24.2)                 |
| Iceland                             | 3.5 (2.8 to 4.4)           | 4.0 (3.1 to 5.0)           | 3.9 (2.9 to 5.2)           | 4.2 (2.5 to 7.1)           | 0.2 (-1.7 to 2.5)                              | 5.2 (-22.8 to 45.7)                 |
| Ireland                             | 1.5 (1.3 to 1.8)           | 2.4 (2.0 to 2.9)           | 2.4 (1.9 to 3.0)           | 3.5 (2.2 to 5.3)           | 2.4 (0.4 to 4.2)                               | 44.4 (5.5 to 88.7)                  |
| Israel                              | 1.6 (1.1 to 2.2)           | 2.6 (1.9 to 3.7)           | 2.6 (1.9 to 4.0)           | 4.1 (2.0 to 7.7)           | 2.7 (0.1 to 5.5)                               | 52.7 (1.3 to 129.7)                 |
| Italy                               | 2.9 (2.6 to 3.3)           | 4.0 (3.5 to 4.6)           | 4.2 (3.5 to 5.0)           | 5.8 (3.8 to 7.4)           | 1.8 (0.3 to 3.3)                               | 32.6 (5.3 to 65.1)                  |
| Luxembourg                          | 2.2 (1.9 to 2.6)           | 3.7 (3.0 to 4.6)           | 3.9 (3.0 to 5.0)           | 6.1 (3.7 to 9.6)           | 3.1 (1.1 to 5.1)                               | 61.2 (17.6 to 115.5)                |
| Malta                               | 1.9 (1.0 to 3.3)           | 2.8 (1.4 to 4.9)           | 2.9 (1.5 to 5.0)           | 4.1 (1.4 to 9.2)           | 2.1 (-1.2 to 5.4)                              | 42.5 (-15.9 to 125.3)               |
| Netherlands                         | 2.3 (1.9 to 2.6)           | 3.8 (3.2 to 4.4)           | 4.0 (3.2 to 4.9)           | 6.0 (3.9 to 8.9)           | 3.0 (1.1 to 4.9)                               | 58.0 (17.7 to 107.5)                |
| Norway                              | 2.6 (2.2 to 3.0)           | 4.2 (3.5 to 5.0)           | 4.2 (3.3 to 5.3)           | 5.8 (3.6 to 8.7)           | 2.0 (0.1 to 3.9)                               | 36.1 (1.6 to 79.8)                  |
| Portugal                            | 1.5 (1.2 to 1.7)           | 3.2 (2.7 to 3.9)           | 3.5 (2.8 to 4.4)           | 6.7 (4.3 to 9.8)           | 4.7 (2.9 to 6.5)                               | 104.7 (55.2 to 165.9)               |
| Spain                               | 2.4 (2.1 to 2.7)           | 3.7 (3.3 to 4.2)           | 3.7 (3.1 to 4.4)           | 5.1 (3.7 to 7.1)           | 2.1 (0.6 to 3.7)                               | 37.9 (9.0 to 73.3)                  |
| Sweden                              | 2.2 (1.8 to 2.7)           | 4.6 (4.0 to 5.3)           | 4.9 (4.0 to 5.9)           | 7.8 (5.3 to 11.1)          | 3.4 (1.5 to 5.1)                               | 67.3 (25.1 to 116.0)                |
| Switzerland                         | 3.9 (3.4 to 4.4)           | 6.5 (5.5 to 7.8)           | 6.5 (5.4 to 7.8)           | 9.6 (6.8 to 13.4)          | 2.7 (1.1 to 4.3)                               | 51.4 (18.4 to 90.4)                 |
| United Kingdom                      | 2.0 (1.8 to 2.2)           | 2.7 (2.4 to 3.1)           | 2.7 (2.2 to 3.3)           | 3.4 (2.4 to 4.9)           | 1.5 (-0.2 to 3.1)                              | 25.8 (-2.6 to 59.3)                 |
| <b>Latin America and Caribbean</b>  |                            |                            |                            |                            |                                                |                                     |
| <b>Andean Latin America</b>         |                            |                            |                            |                            |                                                |                                     |
| Bolivia                             | 1.1 (0.8 to 1.3)           | 1.9 (1.2 to 2.8)           | 2.0 (1.2 to 3.1)           | 3.4 (1.4 to 7.7)           | 3.5 (0.6 to 6.3)                               | 73.8 (9.5 to 158.1)                 |
| Ecuador                             | 1.9 (1.6 to 2.2)           | 2.6 (1.8 to 3.8)           | 2.8 (1.8 to 4.1)           | 3.8 (1.7 to 6.0)           | 2.1 (-0.6 to 4.8)                              | 39.7 (-8.3 to 105.3)                |
| Peru                                | 2.0 (1.0 to 3.2)           | 2.5 (1.3 to 4.3)           | 2.6 (1.3 to 4.4)           | 3.4 (1.3 to 7.2)           | 1.6 (-1.2 to 4.6)                              | 31.2 (-17.0 to 99.2)                |
| <b>Caribbean</b>                    |                            |                            |                            |                            |                                                |                                     |
| Antigua and Barbuda                 | 1.7 (0.9 to 3.0)           | 2.3 (1.2 to 3.9)           | 2.4 (1.2 to 4.1)           | 3.4 (1.2 to 7.3)           | 2.0 (-1.5 to 5.3)                              | 39.9 (-20.6 to 120.9)               |
| The Bahamas                         | 3.2 (1.6 to 5.6)           | 4.5 (2.3 to 8.2)           | 4.5 (2.3 to 8.1)           | 6.5 (2.3 to 15.5)          | 2.0 (-1.3 to 5.5)                              | 39.7 (-17.8 to 128.8)               |
| Barbados                            | 2.3 (1.2 to 4.1)           | 3.0 (1.6 to 5.0)           | 3.1 (1.6 to 5.2)           | 4.1 (1.5 to 8.8)           | 1.6 (-1.6 to 5.1)                              | 32.4 (-21.9 to 115.7)               |
| Belize                              | 0.7 (0.3 to 1.2)           | 1.2 (0.6 to 2.1)           | 1.2 (0.6 to 2.1)           | 2.1 (0.8 to 5.2)           | 3.5 (-0.0 to 6.9)                              | 74.9 (-0.3 to 182.1)                |
| Bermuda                             | 4.1 (2.1 to 7.2)           | 5.9 (3.0 to 10.3)          | 5.8 (3.0 to 10.2)          | 7.7 (2.7 to 17.6)          | 1.3 (-1.8 to 4.9)                              | 25.7 (-2.5 to 108.4)                |
| Cuba                                | 4.9 (4.1 to 5.9)           | 8.6 (5.3 to 13.2)          | 9.0 (5.4 to 14.2)          | 14.1 (5.8 to 29.4)         | 2.9 (0.0 to 5.6)                               | 57.5 (0.2 to 130.3)                 |
| Dominica                            | 1.0 (0.5 to 1.8)           | 1.6 (0.8 to 2.7)           | 1.6 (0.9 to 2.9)           | 2.5 (0.9 to 5.5)           | 2.6 (-0.7 to 6.0)                              | 53.3 (-9.6 to 146.7)                |
| Dominican Republic                  | 1.1 (0.7 to 1.6)           | 1.4 (0.8 to 2.2)           | 1.4 (0.8 to 2.4)           | 1.9 (0.6 to 4.2)           | 1.4 (-1.9 to 4.9)                              | 28.0 (-24.5 to 107.6)               |
| Grenada                             | 1.0 (0.5 to 1.7)           | 1.4 (0.7 to 2.4)           | 1.5 (0.7 to 2.5)           | 2.2 (0.8 to 5.0)           | 2.5 (-0.8 to 6.0)                              | 51.5 (-10.7 to 145.1)               |
| Guyana                              | 0.7 (0.4 to 1.2)           | 1.2 (0.6 to 2.0)           | 1.2 (0.6 to 2.1)           | 1.9 (0.6 to 4.0)           | 2.8 (-0.6 to 6.1)                              | 56.5 (-8.0 to 151.0)                |
| Haiti                               | 0.3 (0.2 to 0.5)           | 0.5 (0.3 to 0.9)           | 0.5 (0.3 to 0.9)           | 0.8 (0.3 to 1.8)           | 2.8 (-0.5 to 6.0)                              | 57.9 (-6.7 to 144.1)                |
| Jamaica                             | 1.4 (0.7 to 2.4)           | 1.9 (1.0 to 3.2)           | 2.0 (1.0 to 3.4)           | 2.9 (1.0 to 6.3)           | 2.2 (-1.0 to 5.6)                              | 44.7 (-14.0 to 132.7)               |
| Puerto Rico                         | 2.2 (1.1 to 3.9)           | 3.1 (1.5 to 5.5)           | 3.2 (1.6 to 5.6)           | 4.4 (1.5 to 10.0)          | 1.9 (-1.5 to 5.2)                              | 37.6 (-19.6 to 117.8)               |
| Saint Lucia                         | 1.2 (0.6 to 2.0)           | 1.9 (0.9 to 3.2)           | 1.9 (1.0 to 3.3)           | 3.1 (1.1 to 6.7)           | 3.0 (-0.5 to 6.4)                              | 63.3 (-7.4 to 160.8)                |
| Saint Vincent and the Grenadines    | 0.9 (0.5 to 1.5)           | 1.4 (0.7 to 2.5)           | 1.5 (0.7 to 2.6)           | 2.3 (0.8 to 5.3)           | 2.9 (0.4 to 6.2)                               | 58.4 (-5.3 to 153.7)                |
| Suriname                            | 0.6 (0.3 to 1.0)           | 0.8 (0.4 to 1.4)           | 0.8 (0.4 to 1.4)           | 1.2 (0.4 to 2.6)           | 2.2 (-1.4 to 5.8)                              | 45.3 (-18.5 to 138.5)               |
| Trinidad and Tobago                 | 0.5 (0.3 to 0.8)           | 0.7 (0.3 to 1.2)           | 0.7 (0.3 to 1.2)           | 0.9 (0.3 to 2.1)           | 1.4 (-1.7 to 4.7)                              | 28.0 (-23.1 to 101.2)               |
| Virgin Islands, U.S.                | 2.8 (1.4 to 4.7)           | 3.6 (1.8 to 6.4)           | 3.6 (1.8 to 6.4)           | 4.7 (1.6 to 10.5)          | 1.4 (-1.8 to 4.7)                              | 27.5 (-24.1 to 102.7)               |
| <b>Central Latin America</b>        |                            |                            |                            |                            |                                                |                                     |
| Colombia                            | 1.3 (0.7 to 2.2)           | 2.0 (1.0 to 3.3)           | 2.1 (1.1 to 3.5)           | 3.2 (1.1 to 6.6)           | 2.6 (-0.6 to 5.7)                              | 52.9 (-9.0 to 134.7)                |
| Costa Rica                          | 2.1 (1.6 to 2.7)           | 2.1 (1.4 to 3.1)           | 2.2 (1.4 to 3.3)           | 2.5 (1.1 to 5.0)           | 0.7 (-1.9 to 3.5)                              | 14.1 (-25.2 to 70.1)                |
| El Salvador                         | 1.1 (0.7 to 1.5)           | 1.7 (1.2 to 2.4)           | 1.8 (1.2 to 2.6)           | 2.8 (1.4 to 5.1)           | 2.9 (0.3 to 5.6)                               | 57.9 (4.7 to 130.4)                 |
| Guatemala                           | 0.7 (0.4 to 1.2)           | 1.3 (0.7 to 2.2)           | 1.3 (0.7 to 2.3)           | 2.2 (0.8 to 4.7)           | 3.2 (-0.0 to 6.2)                              | 66.3 (-0.4 to 152.9)                |
| Honduras                            | 0.5 (0.3 to 0.9)           | 0.8 (0.4 to 1.4)           | 0.9 (0.4 to 1.5)           | 1.4 (0.5 to 3.0)           | 2.7 (-0.4 to 6.1)                              | 55.2 (-6.5 to 148.3)                |
| Mexico                              | 1.8 (1.3 to 2.4)           | 2.4 (1.6 to 3.5)           | 2.4 (1.6 to 3.6)           | 3.3 (1.4 to 6.7)           | 1.6 (-1.2 to 4.6)                              | 30.6 (-6.3 to 98.3)                 |
| Nicaragua                           | 0.8 (0.5 to 1.1)           | 1.4 (0.9 to 2.2)           | 1.5 (0.9 to 2.4)           | 2.6 (1.1 to 5.0)           | 3.6 (0.7 to 6.3)                               | 76.2 (11.2 to 156.4)                |
| Panama                              | 1.5 (1.0 to 2.1)           | 2.2 (1.2 to 3.5)           | 2.3 (1.3 to 3.7)           | 3.4 (1.3 to 6.8)           | 2.6 (-0.3 to 5.3)                              | 51.5 (-4.1 to 123.0)                |
| Venezuela                           | 1.1 (0.7 to 1.6)           | 1.3 (0.7 to 2.0)           | 1.2 (0.7 to 1.9)           | 1.4 (0.5 to 2.9)           | 0.2 (-2.6 to 3.1)                              | 6.2 (-32.4 to 60.3)                 |
| <b>Tropical Latin America</b>       |                            |                            |                            |                            |                                                |                                     |
| Brazil                              | 0.9 (0.6 to 1.3)           | 1.7 (1.3 to 2.1)           | 1.7 (1.3 to 2.3)           | 2.9 (1.5 to 5.0)           | 3.4 (0.7 to 6.2)                               | 70.5 (10.3 to 152.9)                |
| Paraguay                            | 0.8 (0.6 to 1.1)           | 1.1 (0.8 to 1.7)           | 1.2 (0.8 to 1.9)           | 1.7 (0.7 to 3.5)           | 2.4 (-0.5 to 5.2)                              | 46.6 (-7.5 to 119.6)                |
| <b>North Africa and Middle East</b> |                            |                            |                            |                            |                                                |                                     |
| <b>North Africa and Middle East</b> |                            |                            |                            |                            |                                                |                                     |
| Afghanistan                         | 0.1 (0.1 to 0.2)           | 0.2 (0.1 to 0.3)           | 0.2 (0.1 to 0.3)           | 0.3 (0.1 to 0.6)           | 2.8 (-0.4 to 6.1)                              | 56.1 (-6.1 to 149.8)                |
| Algeria                             | 0.6 (0.2 to 0.8)           | 1.0 (0.5 to 1.8)           | 1.1 (0.5 to 1.9)           | 2.1 (0.7 to 4.5)           | 4.3 (1.1 to 7.4)                               | 97.6 (17.4 to 204.1)                |
| Bahrain                             | 1.7 (0.9 to 2.9)           | 2.7 (1.4 to 4.6)           | 2.8 (1.5 to 4.8)           | 4.3 (1.5 to 9.7)           | 2.5 (-0.8 to 5.9)                              | 51.6 (-11.0 to 140.5)               |
| Egypt                               | 1.0 (0.6 to 1.4)           | 1.0 (0.9 to 1.1)           | 1.0 (0.8 to 1.1)           | 1.1 (0.7 to 1.6)           | 0.4 (-1.6 to 2.5)                              | 7.2 (-21.5 to 46.0)                 |
| Iran                                | 0.3 (0.2 to 0.4)           | 0.6 (0.3 to 0.8)           | 0.6 (0.4 to 0.9)           | 1.1 (0.4 to 2.3)           | 3.9 (0.6 to 6.9)                               | 83.5 (9.4 to 181.7)                 |
| Iraq                                | 0.3 (0.2 to 0.5)           | 0.3 (0.2 to 0.5)           | 0.4 (0.2 to 0.6)           | 0.5 (0.2 to 1.1)           | 2.5 (-1.1 to 6.0)                              | 50.3 (-14.7 to 145.2)               |
| Jordan                              | 2.0 (1.6 to 2.4)           | 2.6 (1.6 to 3.8)           | 2.6 (1.6 to 4.0)           | 3.6 (1.4 to 7.2)           | 1.8 (-1.0 to 4.6)                              | 34.7 (-14.1 to 98.0)                |
| Kuwait                              | 2.0 (1.0 to 3.4)           | 3.1 (1.6 to 5.3)           | 3.3 (1.6 to 5.6)           | 5.0 (1.8 to 11.1)          | 2.8 (-0.5 to 6.3)                              | 57.5 (-7.2 to 155.5)                |
| Lebanon                             | 0.9 (0.5 to 1.5)           | 1.5 (0.8 to 2.5)           | 1.6 (0.8 to 2.7)           | 2.6 (0.9 to 5.5)           | 3.4 (-0.0 to 6.7)                              | 73.1 (-0.7 to 174.7)                |
| Libya                               | 1.3 (0.7 to 2.3)           | 1.6 (0.8 to 2.8)           | 1.7 (0.9 to 2.9)           | 2.1 (0.8 to 4.7)           | 1.7 (-0.9 to 4.8)                              | 33.0 (-12.9 to 106.2)               |

|                                               | Estimate in 2000 (95% UIs) | Estimate in 2015 (95% UIs) | Estimate in 2017 (95% UIs) | Estimate in 2020 (95% UIs) | Annualised rate of change, 2015-2020 (95% UIs) | Percent change, 2015-2020 (95% UIs) |
|-----------------------------------------------|----------------------------|----------------------------|----------------------------|----------------------------|------------------------------------------------|-------------------------------------|
| Morocco                                       | 0.3 (0.1 to 0.5)           | 0.5 (0.2 to 0.9)           | 0.5 (0.2 to 0.9)           | 0.9 (0.3 to 1.9)           | 3.2 (-0.1 to 6.4)                              | 68.2 (-2.1 to 162.7)                |
| Palestine                                     | 0.4 (0.2 to 0.6)           | 0.6 (0.3 to 1.0)           | 0.7 (0.3 to 1.1)           | 1.1 (0.4 to 2.5)           | 3.7 (0.3 to 6.7)                               | 78.7 (4.9 to 175.2)                 |
| Oman                                          | 0.8 (0.4 to 1.4)           | 1.9 (0.9 to 3.3)           | 2.0 (1.0 to 3.5)           | 3.9 (1.4 to 8.4)           | 4.5 (1.2 to 7.3)                               | 103.0 (19.8 to 196.8)               |
| Qatar                                         | 2.6 (1.3 to 4.4)           | 3.6 (1.8 to 6.2)           | 3.6 (1.9 to 6.2)           | 5.0 (1.7 to 11.2)          | 1.7 (-1.5 to 5.2)                              | 34.3 (-20.7 to 117.6)               |
| Saudi Arabia                                  | 1.1 (0.6 to 1.9)           | 2.1 (1.1 to 3.4)           | 2.3 (1.2 to 3.8)           | 4.6 (1.7 to 9.5)           | 5.0 (1.8 to 8.0)                               | 116.5 (31.9 to 229.5)               |
| Sudan                                         | 0.2 (0.1 to 0.3)           | 0.4 (0.2 to 0.6)           | 0.4 (0.2 to 0.7)           | 0.7 (0.2 to 1.5)           | 3.9 (0.5 to 7.0)                               | 84.1 (8.1 to 187.7)                 |
| Syria                                         | 0.4 (0.2 to 0.7)           | 0.6 (0.3 to 1.0)           | 0.6 (0.3 to 1.1)           | 0.9 (0.3 to 2.0)           | 2.4 (-0.9 to 5.6)                              | 47.2 (-12.5 to 130.2)               |
| Tunisia                                       | 0.5 (0.3 to 0.8)           | 0.8 (0.4 to 1.4)           | 0.8 (0.4 to 1.4)           | 1.3 (0.4 to 3.0)           | 2.8 (-0.7 to 6.3)                              | 58.1 (-9.5 to 156.8)                |
| Turkey                                        | 0.4 (0.2 to 0.7)           | 0.7 (0.4 to 1.0)           | 0.7 (0.5 to 1.1)           | 1.2 (0.5 to 2.4)           | 3.6 (0.0 to 6.7)                               | 77.2 (0.7 to 175.1)                 |
| United Arab Emirates                          | 2.2 (1.2 to 4.0)           | 3.9 (2.0 to 6.9)           | 3.9 (2.0 to 6.9)           | 6.2 (2.2 to 13.4)          | 2.7 (-0.8 to 5.7)                              | 53.6 (-10.9 to 134.7)               |
| Yemen                                         | 0.3 (0.1 to 0.4)           | 0.4 (0.2 to 0.6)           | 0.4 (0.2 to 0.6)           | 0.5 (0.2 to 1.1)           | 1.8 (-1.1 to 5.0)                              | 34.4 (-15.2 to 111.9)               |
| <b>South Asia</b>                             |                            |                            |                            |                            |                                                |                                     |
| Bangladesh                                    | 0.3 (0.1 to 0.4)           | 0.4 (0.2 to 0.7)           | 0.5 (0.2 to 0.7)           | 0.8 (0.3 to 1.6)           | 3.5 (0.2 to 6.8)                               | 74.2 (3.0 to 175.6)                 |
| Bhutan                                        | 0.5 (0.2 to 0.8)           | 1.0 (0.5 to 1.7)           | 1.1 (0.6 to 1.9)           | 2.1 (0.8 to 4.8)           | 4.7 (1.4 to 7.8)                               | 107.9 (23.9 to 220.5)               |
| India                                         | 0.3 (0.2 to 0.4)           | 0.5 (0.3 to 0.7)           | 0.5 (0.3 to 0.8)           | 0.9 (0.4 to 1.8)           | 3.5 (0.5 to 6.4)                               | 72.9 (8.5 to 161.5)                 |
| Nepal                                         | 0.2 (0.1 to 0.4)           | 0.5 (0.3 to 0.8)           | 0.5 (0.3 to 0.8)           | 0.9 (0.3 to 2.0)           | 4.2 (0.8 to 7.5)                               | 93.7 (13.4 to 209.1)                |
| Pakistan                                      | 0.3 (0.2 to 0.6)           | 0.6 (0.4 to 0.9)           | 0.7 (0.4 to 0.9)           | 1.1 (0.5 to 2.1)           | 3.8 (0.8 to 6.8)                               | 81.5 (12.1 to 178.1)                |
| <b>Southeast Asia, East Asia, and Oceania</b> |                            |                            |                            |                            |                                                |                                     |
| <b>East Asia</b>                              |                            |                            |                            |                            |                                                |                                     |
| China                                         | 1.7 (1.2 to 2.3)           | 3.2 (2.0 to 4.8)           | 3.4 (2.0 to 5.0)           | 6.1 (2.6 to 11.9)          | 4.0 (1.1 to 6.6)                               | 85.0 (18.8 to 168.4)                |
| North Korea                                   | 0.2 (0.1 to 0.3)           | 0.2 (0.1 to 0.4)           | 0.2 (0.1 to 0.4)           | 0.3 (0.1 to 0.6)           | 1.4 (-2.1 to 5.0)                              | 28.7 (-26.9 to 110.4)               |
| Taiwan (Province of China)                    | 0.4 (0.2 to 0.7)           | 0.7 (0.4 to 1.0)           | 0.7 (0.4 to 1.1)           | 1.1 (0.4 to 2.1)           | 2.5 (-0.7 to 5.9)                              | 51.4 (-9.6 to 141.4)                |
| <b>Oceania</b>                                |                            |                            |                            |                            |                                                |                                     |
| American Samoa                                | 0.6 (0.3 to 1.1)           | 0.8 (0.4 to 1.4)           | 0.8 (0.4 to 1.4)           | 1.1 (0.3 to 2.4)           | 1.6 (-1.8 to 5.2)                              | 32.8 (-23.3 to 118.4)               |
| Federated States of Micronesia                | 0.2 (0.1 to 0.4)           | 0.4 (0.2 to 0.6)           | 0.3 (0.2 to 0.6)           | 0.3 (0.2 to 1.0)           | 1.8 (-0.5 to 4.1)                              | 32.5 (-6.8 to 85.9)                 |
| Fiji                                          | 0.5 (0.2 to 0.8)           | 0.6 (0.3 to 1.1)           | 0.6 (0.3 to 1.1)           | 0.8 (0.3 to 2.0)           | 1.8 (-1.6 to 5.2)                              | 35.7 (-21.2 to 117.3)               |
| Guam                                          | 1.2 (0.6 to 2.2)           | 1.4 (0.7 to 2.5)           | 1.4 (0.7 to 2.5)           | 1.6 (0.5 to 3.8)           | 0.7 (-2.9 to 4.1)                              | 15.5 (-35.2 to 86.1)                |
| Kiribati                                      | 0.1 (0.1 to 0.2)           | 0.2 (0.1 to 0.4)           | 0.2 (0.1 to 0.4)           | 0.3 (0.1 to 0.8)           | 3.2 (-0.4 to 6.7)                              | 68.4 (-5.9 to 173.3)                |
| Marshall Islands                              | 0.2 (0.1 to 0.4)           | 0.4 (0.2 to 0.7)           | 0.4 (0.2 to 0.8)           | 0.7 (0.2 to 1.6)           | 3.6 (0.1 to 7.0)                               | 77.3 (1.9 to 184.8)                 |
| Northern Mariana Islands                      | 1.1 (0.6 to 1.9)           | 1.1 (0.6 to 2.0)           | 1.2 (0.6 to 2.1)           | 1.4 (0.5 to 3.0)           | 0.9 (-2.3 to 4.3)                              | 18.7 (-29.4 to 89.8)                |
| Papua New Guinea                              | 0.1 (0.1 to 0.2)           | 0.1 (0.1 to 0.2)           | 0.1 (0.1 to 0.2)           | 0.2 (0.1 to 0.4)           | 1.7 (-1.6 to 5.2)                              | 34.5 (-21.7 to 117.9)               |
| Samoa                                         | 0.2 (0.1 to 0.4)           | 0.2 (0.1 to 0.4)           | 0.2 (0.1 to 0.4)           | 0.2 (0.1 to 0.5)           | 0.5 (-2.4 to 3.8)                              | 10.7 (-29.9 to 76.2)                |
| Solomon Islands                               | 0.1 (0.0 to 0.1)           | 0.1 (0.1 to 0.2)           | 0.1 (0.1 to 0.2)           | 0.2 (0.1 to 0.4)           | 2.7 (-1.0 to 6.2)                              | 54.6 (-13.9 to 154.2)               |
| Tonga                                         | 0.3 (0.1 to 0.5)           | 0.4 (0.2 to 0.7)           | 0.4 (0.2 to 0.7)           | 0.5 (0.2 to 1.2)           | 2.1 (-1.0 to 5.4)                              | 42.1 (-14.4 to 125.6)               |
| Vanuatu                                       | 0.2 (0.1 to 0.3)           | 0.2 (0.1 to 0.4)           | 0.2 (0.1 to 0.4)           | 0.4 (0.1 to 0.8)           | 2.2 (-1.1 to 5.7)                              | 43.8 (-15.8 to 133.6)               |
| <b>Southeast Asia</b>                         |                            |                            |                            |                            |                                                |                                     |
| Cambodia                                      | 0.2 (0.1 to 0.3)           | 0.4 (0.3 to 0.6)           | 0.5 (0.3 to 0.7)           | 0.9 (0.4 to 1.7)           | 4.8 (2.0 to 7.5)                               | 109.7 (34.2 to 209.5)               |
| Indonesia                                     | 0.2 (0.1 to 0.4)           | 0.4 (0.2 to 0.8)           | 0.4 (0.2 to 0.8)           | 0.8 (0.3 to 1.8)           | 3.7 (0.2 to 6.7)                               | 78.6 (3.1 to 172.5)                 |
| Laos                                          | 0.1 (0.1 to 0.2)           | 0.2 (0.1 to 0.3)           | 0.2 (0.1 to 0.3)           | 0.4 (0.1 to 0.8)           | 4.1 (0.7 to 7.6)                               | 92.9 (11.6 to 213.6)                |
| Malaysia                                      | 0.2 (0.1 to 0.3)           | 0.4 (0.2 to 0.7)           | 0.4 (0.2 to 0.7)           | 0.7 (0.2 to 1.6)           | 3.4 (-0.1 to 6.8)                              | 73.3 (-1.3 to 175.5)                |
| Maldives                                      | 0.2 (0.1 to 0.4)           | 0.5 (0.2 to 0.8)           | 0.5 (0.2 to 0.9)           | 1.1 (0.3 to 2.6)           | 5.6 (1.9 to 8.8)                               | 138.2 (23.9 to 271.5)               |
| Mauritius                                     | 0.2 (0.1 to 0.5)           | 0.4 (0.2 to 0.8)           | 0.5 (0.2 to 0.8)           | 0.8 (0.3 to 1.8)           | 3.2 (-0.4 to 6.9)                              | 68.3 (-6.0 to 179.7)                |
| Myanmar                                       | 0.1 (0.0 to 0.1)           | 0.2 (0.1 to 0.5)           | 0.2 (0.1 to 0.5)           | 0.6 (0.2 to 1.2)           | 5.6 (2.2 to 8.4)                               | 138.4 (39.4 to 254.5)               |
| Philippines                                   | 0.2 (0.1 to 0.2)           | 0.1 (0.1 to 0.1)           | 0.1 (0.1 to 0.1)           | 0.1 (0.0 to 0.2)           | -0.6 (-3.2 to 2.2)                             | -6.7 (-37.9 to 40.0)                |
| Sri Lanka                                     | 0.2 (0.1 to 0.3)           | 0.3 (0.2 to 0.6)           | 0.3 (0.2 to 0.7)           | 0.6 (0.2 to 1.4)           | 3.3 (-0.1 to 6.7)                              | 71.3 (-2.1 to 174.8)                |
| Seychelles                                    | 0.3 (0.2 to 0.6)           | 0.5 (0.3 to 1.0)           | 0.6 (0.3 to 1.0)           | 0.9 (0.3 to 2.1)           | 3.0 (-0.8 to 6.5)                              | 63.0 (-11.7 to 166.9)               |
| Thailand                                      | 0.3 (0.2 to 0.6)           | 0.5 (0.2 to 0.9)           | 0.5 (0.3 to 0.9)           | 0.8 (0.3 to 2.0)           | 2.8 (-0.7 to 6.2)                              | 57.5 (-10.6 to 153.7)               |
| Timor-Leste                                   | 0.1 (0.0 to 0.1)           | 0.1 (0.1 to 0.2)           | 0.2 (0.1 to 0.3)           | 0.3 (0.1 to 0.6)           | 3.9 (0.9 to 6.8)                               | 83.2 (14.1 to 179.2)                |
| Vietnam                                       | 0.2 (0.1 to 0.3)           | 0.3 (0.2 to 0.6)           | 0.3 (0.2 to 0.6)           | 0.6 (0.2 to 1.4)           | 4.0 (0.5 to 7.3)                               | 88.6 (7.3 to 199.1)                 |
| <b>Sub-Saharan Africa</b>                     |                            |                            |                            |                            |                                                |                                     |
| <b>Central Sub-Saharan Africa</b>             |                            |                            |                            |                            |                                                |                                     |
| Angola                                        | 0.1 (0.0 to 0.1)           | 0.1 (0.1 to 0.2)           | 0.1 (0.1 to 0.3)           | 0.3 (0.1 to 0.7)           | 5.0 (1.7 to 7.9)                               | 116.7 (28.9 to 227.8)               |
| Central African Republic                      | 0.1 (0.0 to 0.1)           | 0.1 (0.1 to 0.1)           | 0.1 (0.1 to 0.2)           | 0.1 (0.1 to 0.3)           | 2.3 (-1.0 to 5.5)                              | 44.8 (-14.3 to 128.4)               |
| Congo                                         | 0.2 (0.1 to 0.3)           | 0.3 (0.1 to 0.5)           | 0.3 (0.1 to 0.5)           | 0.5 (0.2 to 1.1)           | 3.7 (0.4 to 7.0)                               | 79.5 (6.2 to 186.5)                 |
| Democratic Republic of the Congo              | 0.1 (0.0 to 0.1)           | 0.1 (0.1 to 0.2)           | 0.1 (0.1 to 0.2)           | 0.1 (0.1 to 0.3)           | 2.8 (-0.3 to 5.7)                              | 56.6 (-4.8 to 136.5)                |
| Equatorial Guinea                             | 0.1 (0.0 to 0.1)           | 0.3 (0.1 to 0.5)           | 0.3 (0.1 to 0.5)           | 0.7 (0.2 to 1.6)           | 6.5 (3.0 to 9.5)                               | 173.4 (57.5 to 315.5)               |
| Gabon                                         | 0.2 (0.1 to 0.3)           | 0.3 (0.2 to 0.6)           | 0.4 (0.2 to 0.7)           | 0.6 (0.2 to 1.5)           | 4.0 (0.4 to 7.3)                               | 88.0 (5.5 to 197.2)                 |
| <b>Eastern Sub-Saharan Africa</b>             |                            |                            |                            |                            |                                                |                                     |
| Burundi                                       | 0.1 (0.1 to 0.2)           | 0.2 (0.1 to 0.3)           | 0.2 (0.1 to 0.3)           | 0.3 (0.1 to 0.6)           | 2.1 (-1.4 to 5.3)                              | 41.9 (-19.0 to 122.0)               |
| Comoros                                       | 0.2 (0.1 to 0.3)           | 0.3 (0.1 to 0.6)           | 0.3 (0.2 to 0.6)           | 0.6 (0.2 to 1.3)           | 3.5 (-0.3 to 7.1)                              | 75.9 (-4.1 to 188.2)                |
| Dibouti                                       | 0.1 (0.1 to 0.2)           | 0.3 (0.1 to 0.5)           | 0.3 (0.1 to 0.5)           | 0.5 (0.2 to 1.2)           | 4.1 (0.4 to 7.4)                               | 92.1 (6.1 to 205.2)                 |
| Eritrea                                       | 0.1 (0.1 to 0.3)           | 0.2 (0.1 to 0.4)           | 0.2 (0.1 to 0.4)           | 0.3 (0.1 to 0.7)           | 2.9 (-0.1 to 6.1)                              | 59.4 (-1.0 to 149.2)                |
| Ethiopia                                      | 0.0 (0.0 to 0.1)           | 0.1 (0.0 to 0.1)           | 0.1 (0.1 to 0.1)           | 0.2 (0.1 to 0.4)           | 5.3 (2.2 to 8.0)                               | 128.5 (38.5 to 231.2)               |
| Kenya                                         | 0.2 (0.1 to 0.4)           | 0.4 (0.2 to 0.6)           | 0.4 (0.2 to 0.7)           | 0.6 (0.2 to 1.4)           | 3.0 (-0.8 to 6.7)                              | 62.6 (-10.6 to 173.6)               |
| Madagascar                                    | 0.2 (0.1 to 0.3)           | 0.2 (0.1 to 0.4)           | 0.2 (0.1 to 0.4)           | 0.2 (0.1 to 0.4)           | 1.7 (-2.0 to 5.1)                              | 33.6 (-25.6 to 116.1)               |
| Malawi                                        | 0.1 (0.1 to 0.2)           | 0.2 (0.1 to 0.4)           | 0.2 (0.1 to 0.4)           | 0.4 (0.1 to 0.9)           | 3.3 (-0.2 to 6.6)                              | 70.3 (-3.6 to 171.0)                |
| Mozambique                                    | 0.1 (0.0 to 0.1)           | 0.1 (0.1 to 0.2)           | 0.1 (0.1 to 0.2)           | 0.2 (0.1 to 0.4)           | 3.9 (0.5 to 7.2)                               | 84.9 (8.0 to 193.3)                 |
| Rwanda                                        | 0.2 (0.1 to 0.3)           | 0.6 (0.4 to 0.8)           | 0.6 (0.4 to 0.8)           | 1.2 (0.6 to 2.0)           | 4.9 (2.3 to 7.3)                               | 111.4 (41.8 to 198.2)               |
| Somalia                                       | 0.1 (0.0 to 0.1)           | 0.1 (0.1 to 0.2)           | 0.1 (0.1 to 0.2)           | 0.2 (0.1 to 0.5)           | 2.7 (-1.0 to 6.3)                              | 56.8 (-13.6 to 156.0)               |
| South Sudan                                   | 0.1 (0.0 to 0.2)           | 0.1 (0.1 to 0.3)           | 0.1 (0.1 to 0.3)           | 0.2 (0.1 to 0.5)           | 2.6 (-1.0 to 6.2)                              | 54.1 (-14.3 to 152.7)               |
| Tanzania                                      | 0.2 (0.1 to 0.3)           | 0.4 (0.3 to 0.6)           | 0.5 (0.3 to 0.7)           | 0.9 (0.4 to 1.8)           | 4.5 (1.4 to 7.5)                               | 101.4 (23.6 to 209.8)               |
| Uganda                                        | 0.1 (0.1 to 0.1)           | 0.1 (0.1 to 0.2)           | 0.1 (0.1 to 0.2)           | 0.2 (0.1 to 0.4)           | 2.2 (-0.9 to 5.2)                              | 42.5 (-12.1 to 119.1)               |
| Zambia                                        | 0.1 (0.1 to 0.2)           | 0.4 (0.3 to 0.5)           | 0.4 (0.3 to 0.6)           | 0.9 (0.4 to 1.7)           | 5.2 (2.1 to 9.9)                               | 124.2 (37.9 to 229.0)               |
| <b>Southern Sub-Saharan Africa</b>            |                            |                            |                            |                            |                                                |                                     |
| Botswana                                      | 0.2 (0.1 to 0.3)           | 0.3 (0.2 to 0.6)           | 0.4 (0.2 to 0.7)           | 0.7 (0.2 to 1.5)           | 3.9 (0.4 to 7.4)                               | 87.0 (5.9 to 204.9)                 |
| Lesotho                                       | 0.1 (0.0 to 0.1)           | 0.1 (0.1 to 0.2)           | 0.1 (0.1 to 0.2)           | 0.1 (0.1 to 0.2)           | 2.8 (-0.6 to 6.0)                              | 56.2 (-9.3 to 145.8)                |
| Namibia                                       | 0.1 (0.1 to 0.3)           | 0.3 (0.1 to 0.4)           | 0.3 (0.1 to 0.5)           | 0.5 (0.2 to 1.1)           | 4.0 (0.1 to 7.6)                               | 90.5 (0.9 to 211.5)                 |
| South Africa                                  | 0.3 (0.2 to 0.5)           | 0.4 (0.3 to 0.7)           | 0.4 (0.2 to 0.6)           | 0.5 (0.2 to 1.1)           | 1.0 (-1.5 to 4.1)                              | 19.2 (-19.9 to 85.6)                |
| Swaziland                                     | 0.1 (0.1 to 0.2)           | 0.1 (0.1 to 0.2)           | 0.1 (0.1 to 0.2)           | 0.2 (0.1 to 0.5)           | 2.3 (-1.0 to 5.6)                              | 45.8 (-13.6 to 131.9)               |

|                                                                                                                                                                                                                   | Estimate in 2000 (95% UIs) | Estimate in 2015 (95% UIs) | Estimate in 2017 (95% UIs) | Estimate in 2020 (95% UIs) | Annualised rate of change, 2015-2020 (95% UIs) | Percent change, 2015-2020 (95% UIs) |
|-------------------------------------------------------------------------------------------------------------------------------------------------------------------------------------------------------------------|----------------------------|----------------------------|----------------------------|----------------------------|------------------------------------------------|-------------------------------------|
| Zimbabwe                                                                                                                                                                                                          | 0.1 (0.1 to 0.3)           | 0.1 (0.1 to 0.2)           | 0.1 (0.1 to 0.3)           | 0.2 (0.1 to 0.4)           | 1.7 (-1.5 to 5.1)                              | 33.5 (-20.1 to 114.6)               |
| <b>Western Sub-Saharan Africa</b>                                                                                                                                                                                 |                            |                            |                            |                            |                                                |                                     |
| Benin                                                                                                                                                                                                             | 0.0 (0.0 to 0.0)           | 0.0 (0.0 to 0.0)           | 0.0 (0.0 to 0.0)           | 0.0 (0.0 to 0.1)           | 3.9 (0.3 to 7.6)                               | 87.8 (4.2 to 214.2)                 |
| Burkina Faso                                                                                                                                                                                                      | 0.1 (0.0 to 0.1)           | 0.1 (0.1 to 0.2)           | 0.1 (0.1 to 0.2)           | 0.2 (0.1 to 0.2)           | 3.2 (-0.6 to 6.9)                              | 67.9 (-8.4 to 180.4)                |
| Cameroon                                                                                                                                                                                                          | 0.3 (0.2 to 0.4)           | 0.5 (0.3 to 0.8)           | 0.6 (0.3 to 0.9)           | 1.0 (0.4 to 2.2)           | 4.2 (0.9 to 7.4)                               | 94.6 (15.3 to 203.3)                |
| Cape Verde                                                                                                                                                                                                        | 0.2 (0.1 to 0.3)           | 0.4 (0.2 to 0.7)           | 0.4 (0.2 to 0.8)           | 0.9 (0.3 to 2.0)           | 5.0 (1.2 to 8.3)                               | 119.4 (18.9 to 249.8)               |
| Chad                                                                                                                                                                                                              | 0.0 (0.0 to 0.1)           | 0.1 (0.0 to 0.1)           | 0.1 (0.0 to 0.1)           | 0.1 (0.0 to 0.3)           | 3.8 (0.1 to 7.1)                               | 83.4 (1.5 to 191.2)                 |
| Cote d'Ivoire                                                                                                                                                                                                     | 0.1 (0.1 to 0.3)           | 0.2 (0.1 to 0.4)           | 0.2 (0.1 to 0.4)           | 0.4 (0.1 to 0.9)           | 3.0 (-0.5 to 6.5)                              | 61.7 (-6.6 to 164.1)                |
| The Gambia                                                                                                                                                                                                        | 0.1 (0.1 to 0.2)           | 0.2 (0.1 to 0.3)           | 0.2 (0.1 to 0.3)           | 0.3 (0.1 to 0.6)           | 2.3 (-1.1 to 5.8)                              | 46.9 (-15.3 to 139.8)               |
| Ghana                                                                                                                                                                                                             | 0.4 (0.2 to 0.7)           | 0.7 (0.4 to 1.1)           | 0.7 (0.4 to 1.1)           | 1.1 (0.4 to 2.1)           | 2.4 (-0.6 to 5.4)                              | 46.4 (-9.2 to 124.2)                |
| Guinea                                                                                                                                                                                                            | 0.1 (0.1 to 0.2)           | 0.2 (0.1 to 0.4)           | 0.2 (0.1 to 0.4)           | 0.3 (0.1 to 0.7)           | 2.7 (-0.2 to 5.5)                              | 54.4 (-3.4 to 127.7)                |
| Guinea-Bissau                                                                                                                                                                                                     | 0.1 (0.0 to 0.1)           | 0.1 (0.1 to 0.2)           | 0.2 (0.1 to 0.3)           | 0.3 (0.1 to 0.6)           | 4.0 (0.8 to 7.6)                               | 89.5 (12.1 to 211.4)                |
| Liberia                                                                                                                                                                                                           | 0.1 (0.0 to 0.1)           | 0.1 (0.0 to 0.2)           | 0.1 (0.1 to 0.3)           | 0.2 (0.1 to 0.5)           | 4.1 (1.4 to 7.0)                               | 89.9 (24.2 to 185.7)                |
| Mali                                                                                                                                                                                                              | 0.1 (0.0 to 0.1)           | 0.1 (0.0 to 0.1)           | 0.1 (0.0 to 0.1)           | 0.1 (0.0 to 0.3)           | 3.1 (-0.8 to 6.7)                              | 65.4 (-11.0 to 173.1)               |
| Mauritania                                                                                                                                                                                                        | 0.1 (0.1 to 0.2)           | 0.2 (0.1 to 0.3)           | 0.2 (0.1 to 0.4)           | 0.3 (0.1 to 0.8)           | 3.0 (-0.3 to 6.4)                              | 63.6 (-4.2 to 162.5)                |
| Niger                                                                                                                                                                                                             | 0.0 (0.0 to 0.1)           | 0.1 (0.0 to 0.1)           | 0.1 (0.0 to 0.1)           | 0.1 (0.0 to 0.2)           | 2.1 (-1.5 to 5.5)                              | 41.2 (-19.6 to 126.8)               |
| Nigeria                                                                                                                                                                                                           | 0.2 (0.1 to 0.3)           | 0.4 (0.3 to 0.5)           | 0.4 (0.2 to 0.5)           | 0.6 (0.2 to 1.1)           | 2.1 (-1.0 to 5.5)                              | 41.9 (-14.3 to 129.9)               |
| Sao Tome and Principe                                                                                                                                                                                             | 0.1 (0.1 to 0.2)           | 0.3 (0.1 to 0.5)           | 0.3 (0.1 to 0.5)           | 0.6 (0.2 to 1.4)           | 5.4 (1.9 to 8.1)                               | 132.0 (32.3 to 239.4)               |
| Senegal                                                                                                                                                                                                           | 0.2 (0.1 to 0.2)           | 0.2 (0.1 to 0.3)           | 0.2 (0.1 to 0.4)           | 0.3 (0.1 to 0.7)           | 1.6 (-1.7 to 4.8)                              | 31.9 (-22.1 to 106.5)               |
| Sierra Leone                                                                                                                                                                                                      | 0.2 (0.1 to 0.4)           | 0.4 (0.2 to 0.6)           | 0.4 (0.3 to 0.7)           | 0.8 (0.3 to 1.8)           | 4.9 (1.2 to 8.0)                               | 114.4 (19.6 to 231.1)               |
| Togo                                                                                                                                                                                                              | 0.1 (0.1 to 0.2)           | 0.2 (0.1 to 0.2)           | 0.2 (0.1 to 0.4)           | 0.4 (0.1 to 0.9)           | 3.5 (0.1 to 7.0)                               | 76.0 (1.9 to 186.8)                 |
| <b>Indicator 5.2.1: Age-standardised prevalence of ever-partnered women aged 15 years and older who experienced physical or sexual violence by a current or former intimate partner in the last 12 months (%)</b> |                            |                            |                            |                            |                                                |                                     |
| <b>Central Europe, Eastern Europe, and Central Asia</b>                                                                                                                                                           |                            |                            |                            |                            |                                                |                                     |
| <b>Central Asia</b>                                                                                                                                                                                               |                            |                            |                            |                            |                                                |                                     |
| Armenia                                                                                                                                                                                                           | 9.2 (7.8 to 10.7)          | 7.6 (6.5 to 8.9)           | 7.5 (6.3 to 8.8)           | 6.6 (5.5 to 7.8)           | -1.0 (-1.3 to -0.7)                            | -13.8 (-18.2 to -9.5)               |
| Azerbaijan                                                                                                                                                                                                        | 9.2 (8.2 to 10.2)          | 7.6 (6.8 to 8.3)           | 7.5 (6.7 to 8.3)           | 6.5 (5.7 to 7.3)           | -1.0 (-1.4 to -0.7)                            | -14.4 (-19.2 to -9.6)               |
| Georgia                                                                                                                                                                                                           | 4.7 (4.2 to 5.3)           | 4.4 (3.9 to 4.8)           | 4.4 (3.9 to 4.9)           | 4.2 (3.7 to 4.8)           | -0.2 (-0.6 to 0.2)                             | -3.0 (-8.1 to 2.8)                  |
| Kazakhstan                                                                                                                                                                                                        | 6.7 (6.0 to 7.5)           | 5.7 (5.2 to 6.3)           | 5.6 (5.0 to 6.2)           | 4.9 (4.2 to 5.5)           | -1.1 (-1.5 to -0.7)                            | -15.0 (-19.8 to -9.7)               |
| Kyrgyzstan                                                                                                                                                                                                        | 14.6 (13.0 to 16.3)        | 13.6 (12.5 to 14.8)        | 13.4 (12.1 to 14.6)        | 12.4 (11.1 to 13.8)        | -0.6 (-1.0 to -0.3)                            | -9.2 (-13.7 to -4.3)                |
| Mongolia                                                                                                                                                                                                          | 10.5 (8.9 to 12.4)         | 9.1 (7.7 to 10.6)          | 8.9 (7.6 to 10.4)          | 8.0 (6.7 to 9.4)           | -0.8 (-1.2 to -0.5)                            | -11.8 (-15.9 to -7.6)               |
| Tajikistan                                                                                                                                                                                                        | 14.5 (13.0 to 16.2)        | 12.3 (11.3 to 13.4)        | 12.2 (11.1 to 13.4)        | 11.1 (9.9 to 12.3)         | -0.7 (-1.0 to -0.4)                            | -10.2 (-14.4 to -5.2)               |
| Turkmenistan                                                                                                                                                                                                      | 9.2 (7.8 to 10.8)          | 8.0 (6.8 to 9.3)           | 7.7 (6.6 to 9.1)           | 6.8 (5.6 to 8.1)           | -1.0 (-1.4 to -0.7)                            | -14.5 (-18.8 to -10.2)              |
| Uzbekistan                                                                                                                                                                                                        | 9.8 (8.3 to 11.6)          | 8.2 (7.0 to 9.7)           | 8.1 (6.9 to 9.6)           | 7.1 (5.9 to 8.4)           | -1.0 (-1.3 to -0.7)                            | -14.1 (-17.8 to -9.8)               |
| <b>Central Europe</b>                                                                                                                                                                                             |                            |                            |                            |                            |                                                |                                     |
| Albania                                                                                                                                                                                                           | 5.6 (5.1 to 6.2)           | 4.5 (4.0 to 5.0)           | 4.4 (4.0 to 5.0)           | 3.9 (3.4 to 4.5)           | -1.0 (-1.4 to -0.7)                            | -13.9 (-18.4 to -9.9)               |
| Bosnia and Herzegovina                                                                                                                                                                                            | 8.1 (6.9 to 9.4)           | 6.8 (5.8 to 7.9)           | 6.7 (5.7 to 7.8)           | 5.8 (4.9 to 6.8)           | -1.1 (-1.5 to -0.7)                            | -15.0 (-19.6 to -10.2)              |
| Bulgaria                                                                                                                                                                                                          | 9.6 (8.6 to 10.7)          | 8.2 (7.4 to 9.1)           | 8.1 (7.3 to 9.0)           | 7.2 (6.4 to 8.2)           | -0.8 (-1.2 to -0.5)                            | -11.9 (-16.1 to -7.6)               |
| Croatia                                                                                                                                                                                                           | 4.3 (3.8 to 4.8)           | 3.6 (3.3 to 4.1)           | 3.6 (3.2 to 4.0)           | 3.2 (2.8 to 3.7)           | -0.8 (-1.1 to -0.5)                            | -11.5 (-15.7 to -7.2)               |
| Czech Republic                                                                                                                                                                                                    | 6.2 (5.5 to 6.9)           | 5.5 (5.0 to 6.1)           | 5.5 (4.9 to 6.1)           | 5.0 (4.4 to 5.6)           | -0.7 (-1.0 to -0.3)                            | -9.5 (-13.8 to -4.9)                |
| Hungary                                                                                                                                                                                                           | 8.9 (8.0 to 10.0)          | 7.7 (7.0 to 8.5)           | 7.7 (7.0 to 8.5)           | 6.9 (6.2 to 7.8)           | -0.7 (-1.1 to -0.4)                            | -10.5 (-14.6 to -6.2)               |
| Macedonia                                                                                                                                                                                                         | 7.4 (6.3 to 8.7)           | 6.3 (5.4 to 7.3)           | 6.2 (5.3 to 7.2)           | 5.5 (4.7 to 6.5)           | -0.9 (-1.2 to -0.6)                            | -12.0 (-16.3 to -7.6)               |
| Montenegro                                                                                                                                                                                                        | 7.3 (6.3 to 8.6)           | 6.3 (5.4 to 7.4)           | 6.3 (5.3 to 7.3)           | 5.7 (4.8 to 6.7)           | -0.7 (-1.1 to -0.4)                            | -10.6 (-14.6 to -6.1)               |
| Poland                                                                                                                                                                                                            | 4.1 (3.7 to 4.6)           | 3.4 (3.0 to 3.8)           | 3.4 (3.0 to 3.7)           | 2.9 (2.6 to 3.2)           | -1.1 (-1.4 to -0.7)                            | -14.8 (-18.4 to -10.6)              |
| Romania                                                                                                                                                                                                           | 9.0 (8.1 to 10.0)          | 7.5 (6.8 to 8.3)           | 7.4 (6.7 to 8.2)           | 6.5 (5.8 to 7.3)           | -1.0 (-1.3 to -0.6)                            | -13.5 (-17.9 to -9.2)               |
| Serbia                                                                                                                                                                                                            | 7.8 (6.7 to 9.1)           | 6.5 (5.6 to 7.6)           | 6.5 (5.5 to 7.6)           | 5.8 (4.9 to 6.9)           | -0.8 (-1.2 to -0.5)                            | -11.1 (-16.2 to -7.2)               |
| Slovakia                                                                                                                                                                                                          | 8.8 (7.9 to 9.8)           | 7.7 (6.9 to 8.6)           | 7.6 (6.9 to 8.5)           | 6.8 (6.1 to 7.8)           | -0.8 (-1.1 to -0.5)                            | -11.1 (-15.3 to -6.7)               |
| Slovenia                                                                                                                                                                                                          | 3.6 (3.3 to 4.0)           | 3.1 (2.8 to 3.5)           | 3.1 (2.8 to 3.5)           | 2.8 (2.5 to 3.2)           | -0.8 (-1.1 to -0.4)                            | -10.7 (-14.7 to -6.1)               |
| <b>Eastern Europe</b>                                                                                                                                                                                             |                            |                            |                            |                            |                                                |                                     |
| Belarus                                                                                                                                                                                                           | 8.9 (7.9 to 9.9)           | 7.8 (6.8 to 8.8)           | 7.6 (6.6 to 8.7)           | 6.8 (5.7 to 8.0)           | -0.9 (-1.3 to -0.5)                            | -12.4 (-18.0 to -6.7)               |
| Estonia                                                                                                                                                                                                           | 5.2 (4.6 to 5.7)           | 4.2 (3.8 to 4.7)           | 4.2 (3.8 to 4.7)           | 3.7 (3.3 to 4.2)           | -1.0 (-1.3 to -0.7)                            | -13.6 (-17.7 to -9.4)               |
| Latvia                                                                                                                                                                                                            | 8.5 (7.5 to 9.4)           | 7.1 (6.4 to 7.8)           | 7.0 (6.3 to 7.8)           | 6.2 (5.5 to 7.0)           | -0.9 (-1.2 to -0.6)                            | -12.4 (-16.8 to -8.1)               |
| Lithuania                                                                                                                                                                                                         | 6.5 (5.9 to 7.3)           | 5.5 (5.0 to 6.1)           | 5.5 (4.9 to 6.1)           | 4.8 (4.3 to 5.4)           | -1.0 (-1.3 to -0.7)                            | -13.3 (-17.3 to -9.3)               |
| Moldova                                                                                                                                                                                                           | 11.8 (10.9 to 12.9)        | 10.2 (9.2 to 11.2)         | 9.9 (8.9 to 10.9)          | 8.5 (7.4 to 9.7)           | -1.2 (-1.7 to -0.8)                            | -16.7 (-22.1 to -10.9)              |
| Russia                                                                                                                                                                                                            | 9.7 (8.7 to 10.8)          | 8.7 (7.8 to 9.7)           | 8.7 (7.8 to 9.7)           | 8.0 (7.1 to 8.9)           | -0.6 (-0.7 to -0.5)                            | -8.3 (-9.7 to -6.6)                 |
| Ukraine                                                                                                                                                                                                           | 12.6 (11.3 to 14.0)        | 12.2 (10.9 to 13.6)        | 12.4 (11.1 to 13.9)        | 12.6 (11.1 to 14.3)        | 0.2 (0.1 to 0.5)                               | 3.5 (-1.1 to 7.7)                   |
| <b>High-income</b>                                                                                                                                                                                                |                            |                            |                            |                            |                                                |                                     |
| <b>Australasia</b>                                                                                                                                                                                                |                            |                            |                            |                            |                                                |                                     |
| Australia                                                                                                                                                                                                         | 3.5 (3.1 to 3.9)           | 3.3 (2.9 to 3.7)           | 3.2 (2.9 to 3.7)           | 3.1 (2.7 to 3.6)           | -0.4 (-0.7 to -0.0)                            | -5.5 (-10.6 to -0.6)                |
| New Zealand                                                                                                                                                                                                       | 10.0 (8.9 to 11.4)         | 9.4 (8.4 to 10.6)          | 9.2 (8.2 to 10.4)          | 8.4 (7.4 to 9.6)           | -0.8 (-1.0 to -0.5)                            | -10.7 (-14.4 to -6.9)               |
| <b>High-income Asia Pacific</b>                                                                                                                                                                                   |                            |                            |                            |                            |                                                |                                     |
| Brunei                                                                                                                                                                                                            | 5.9 (5.2 to 6.7)           | 5.3 (4.7 to 6.1)           | 5.3 (4.7 to 6.0)           | 4.9 (4.2 to 5.7)           | -0.6 (-1.0 to -0.2)                            | -8.4 (-13.4 to -3.3)                |
| Japan                                                                                                                                                                                                             | 5.8 (5.2 to 6.6)           | 5.3 (4.8 to 6.0)           | 5.3 (4.7 to 6.0)           | 4.9 (4.4 to 5.6)           | -0.5 (-0.6 to -0.4)                            | -7.7 (-8.9 to -6.5)                 |
| South Korea                                                                                                                                                                                                       | 6.3 (5.6 to 7.3)           | 5.5 (4.8 to 6.3)           | 5.5 (4.8 to 6.2)           | 4.9 (4.2 to 5.6)           | -0.8 (-1.2 to -0.5)                            | -11.5 (-15.9 to -6.6)               |
| Singapore                                                                                                                                                                                                         | 5.9 (5.2 to 6.8)           | 5.0 (4.4 to 5.7)           | 4.9 (4.3 to 5.7)           | 4.3 (3.7 to 5.0)           | -0.9 (-1.3 to -0.5)                            | -12.8 (-17.7 to -7.2)               |
| <b>High-income North America</b>                                                                                                                                                                                  |                            |                            |                            |                            |                                                |                                     |
| Canada                                                                                                                                                                                                            | 6.1 (5.4 to 7.0)           | 5.9 (5.2 to 6.8)           | 5.9 (5.1 to 6.7)           | 5.6 (4.8 to 6.6)           | -0.3 (-0.7 to 0.1)                             | -4.4 (-10.3 to 1.4)                 |
| Greenland                                                                                                                                                                                                         | 6.7 (5.4 to 8.4)           | 6.0 (4.8 to 7.6)           | 6.0 (4.8 to 7.4)           | 5.5 (4.6 to 6.8)           | -0.6 (-1.0 to -0.2)                            | -8.6 (-14.1 to -2.2)                |
| United States                                                                                                                                                                                                     | 2.8 (2.4 to 3.3)           | 2.5 (2.2 to 3.0)           | 2.6 (2.3 to 3.1)           | 2.6 (2.3 to 3.1)           | 0.3 (0.1 to 0.4)                               | 3.9 (1.7 to 6.4)                    |
| <b>Southern Latin America</b>                                                                                                                                                                                     |                            |                            |                            |                            |                                                |                                     |
| Argentina                                                                                                                                                                                                         | 14.1 (12.0 to 16.5)        | 12.7 (10.7 to 14.8)        | 12.6 (10.6 to 14.7)        | 11.5 (9.5 to 13.6)         | -0.7 (-1.0 to -0.2)                            | -9.4 (-14.1 to -3.5)                |
| Chile                                                                                                                                                                                                             | 11.7 (9.7 to 14.0)         | 10.1 (8.4 to 12.1)         | 9.9 (8.2 to 11.9)          | 8.7 (7.1 to 10.6)          | -1.0 (-1.4 to -0.6)                            | -13.7 (-18.6 to -8.7)               |
| Uruguay                                                                                                                                                                                                           | 10.4 (8.7 to 12.6)         | 9.3 (7.7 to 11.3)          | 9.3 (7.7 to 11.3)          | 8.5 (6.9 to 10.6)          | -0.6 (-1.1 to -0.2)                            | -8.8 (-14.7 to -3.2)                |
| <b>Western Europe</b>                                                                                                                                                                                             |                            |                            |                            |                            |                                                |                                     |
| Andorra                                                                                                                                                                                                           | 5.3 (4.6 to 6.2)           | 5.1 (4.3 to 6.0)           | 5.1 (4.3 to 5.9)           | 4.9 (4.1 to 5.8)           | -0.3 (-0.6 to 0.1)                             | -3.9 (-8.6 to 1.5)                  |
| Austria                                                                                                                                                                                                           | 4.6 (4.0 to 5.3)           | 4.1 (3.6 to 4.7)           | 4.0 (3.5 to 4.6)           | 3.7 (3.2 to 4.2)           | -0.7 (-1.1 to -0.3)                            | -9.7 (-14.8 to -4.0)                |
| Belgium                                                                                                                                                                                                           | 7.4 (6.6 to 8.4)           | 6.9 (6.1 to 7.7)           | 6.8 (6.0 to 7.6)           | 6.4 (5.5 to 7.3)           | -0.5 (-0.9 to -0.1)                            | -7.3 (-12.3 to -2.1)                |
| Cyprus                                                                                                                                                                                                            | 5.7 (5.1 to 6.5)           | 3.9 (3.4 to 4.4)           | 3.9 (3.4 to 4.4)           | 3.2 (2.8 to 3.7)           | -1.3 (-1.7 to -0.9)                            | -17.4 (-22.4 to -12.9)              |
| Denmark                                                                                                                                                                                                           | 6.2 (5.5 to 6.9)           | 5.6 (5.0 to 6.3)           | 5.6 (4.9 to 6.3)           | 5.2 (4.5 to 6.0)           | -0.6 (-0.9 to -0.2)                            | -8.1 (-12.8 to -3.2)                |
| Finland                                                                                                                                                                                                           | 7.0 (6.2 to 7.9)           | 6.5 (5.8 to 7.3)           | 6.3 (5.6 to 7.1)           | 5.8 (5.1 to 6.7)           | -0.7 (-1.0 to -0.3)                            | -10.0 (-14.5 to -5.1)               |
| France                                                                                                                                                                                                            | 7.2 (6.4 to 8.2)           | 6.7 (6.0 to 7.5)           | 6.5 (5.9 to 7.4)           | 6.1 (5.3 to 6.9)           | -0.6 (-0.9 to -0.2)                            | -8.6 (-13.2 to -2.8)                |

|                                     | Estimate in 2000 (95% UIs) | Estimate in 2015 (95% UIs) | Estimate in 2017 (95% UIs) | Estimate in 2020 (95% UIs) | Annualised rate of change, 2015-2020 (95% UIs) | Percent change, 2015-2020 (95% UIs) |
|-------------------------------------|----------------------------|----------------------------|----------------------------|----------------------------|------------------------------------------------|-------------------------------------|
| Germany                             | 5.3 (4.7 to 6.1)           | 4.8 (4.2 to 5.4)           | 4.7 (4.1 to 5.3)           | 4.3 (3.7 to 5.0)           | -0.7 (-1.1 to -0.3)                            | -9.7 (-14.6 to -4.9)                |
| Greece                              | 7.5 (7.0 to 8.8)           | 7.2 (6.5 to 8.1)           | 7.2 (6.4 to 8.1)           | 6.8 (6.0 to 7.7)           | -0.7 (-0.7 to -0.1)                            | -5.6 (-10.0 to -1.0)                |
| Iceland                             | 5.6 (4.8 to 6.5)           | 5.0 (4.3 to 5.8)           | 5.0 (4.3 to 5.8)           | 4.6 (3.9 to 5.5)           | -0.6 (-0.9 to -0.3)                            | -8.1 (-13.1 to -3.7)                |
| Ireland                             | 5.4 (4.7 to 6.1)           | 4.8 (4.2 to 5.4)           | 4.7 (4.2 to 5.3)           | 4.3 (3.7 to 4.9)           | -0.8 (-1.1 to -0.4)                            | -10.9 (-15.6 to -6.2)               |
| Israel                              | 6.8 (5.9 to 8.0)           | 6.3 (5.4 to 7.3)           | 6.3 (5.4 to 7.3)           | 5.9 (5.0 to 6.9)           | -0.5 (-0.8 to -0.2)                            | -6.9 (-11.2 to -2.3)                |
| Italy                               | 8.0 (7.2 to 9.1)           | 7.4 (6.6 to 8.2)           | 7.3 (6.6 to 8.2)           | 6.9 (6.1 to 7.8)           | -0.5 (-0.8 to -0.1)                            | -6.6 (-11.3 to -2.0)                |
| Luxembourg                          | 3.9 (3.5 to 4.4)           | 3.6 (3.2 to 4.0)           | 3.6 (3.2 to 4.0)           | 3.4 (3.0 to 3.8)           | -0.5 (-0.8 to -0.2)                            | -6.8 (-11.5 to -2.4)                |
| Malta                               | 5.8 (5.1 to 6.6)           | 5.2 (4.6 to 5.9)           | 5.1 (4.5 to 5.8)           | 4.6 (4.1 to 5.3)           | -0.8 (-1.1 to -0.4)                            | -10.7 (-15.7 to -5.7)               |
| Netherlands                         | 7.2 (6.4 to 8.1)           | 6.6 (5.9 to 7.4)           | 6.5 (5.8 to 7.3)           | 6.0 (5.3 to 6.9)           | -0.6 (-0.9 to -0.3)                            | -8.5 (-12.8 to -3.8)                |
| Norway                              | 5.8 (5.2 to 6.5)           | 5.3 (4.7 to 5.9)           | 5.2 (4.6 to 5.8)           | 4.8 (4.3 to 5.4)           | -0.7 (-0.8 to -0.5)                            | -9.4 (-10.9 to -7.8)                |
| Portugal                            | 7.7 (6.8 to 8.7)           | 6.6 (5.9 to 7.5)           | 6.5 (5.8 to 7.4)           | 5.8 (5.1 to 6.6)           | -0.9 (-1.2 to -0.5)                            | -12.1 (-16.5 to -7.7)               |
| Spain                               | 4.0 (3.5 to 4.5)           | 3.6 (3.2 to 4.0)           | 3.5 (3.1 to 4.0)           | 3.3 (2.9 to 3.7)           | -0.5 (-0.9 to -0.2)                            | -7.8 (-12.3 to -3.1)                |
| Sweden                              | 7.0 (6.2 to 7.8)           | 7.1 (6.4 to 8.0)           | 7.1 (6.4 to 8.0)           | 7.3 (6.4 to 8.3)           | 0.1 (-0.1 to 0.4)                              | 2.0 (-1.8 to 6.5)                   |
| Switzerland                         | 5.6 (4.8 to 6.6)           | 5.2 (4.5 to 6.0)           | 5.2 (4.5 to 6.0)           | 4.9 (4.2 to 5.7)           | -0.4 (-0.8 to -0.1)                            | -6.3 (-11.3 to -1.3)                |
| United Kingdom                      | 6.4 (5.7 to 7.2)           | 6.2 (5.5 to 7.0)           | 6.2 (5.5 to 6.9)           | 6.0 (5.4 to 6.8)           | -0.1 (-0.2 to -0.1)                            | -2.2 (-3.0 to -1.4)                 |
| <b>Latin America and Caribbean</b>  |                            |                            |                            |                            |                                                |                                     |
| <b>Andean Latin America</b>         |                            |                            |                            |                            |                                                |                                     |
| Bolivia                             | 21.5 (19.2 to 24.1)        | 18.1 (16.3 to 20.2)        | 17.9 (16.0 to 20.2)        | 15.8 (13.8 to 18.2)        | -0.9 (-1.3 to -0.5)                            | -12.9 (-17.7 to -7.1)               |
| Ecuador                             | 11.1 (10.3 to 12.2)        | 10.8 (9.6 to 12.2)         | 10.4 (9.3 to 11.8)         | 9.5 (8.2 to 11.0)          | -0.8 (-1.2 to -0.4)                            | -11.6 (-16.9 to -6.2)               |
| Peru                                | 13.6 (12.5 to 14.7)        | 11.4 (10.9 to 11.8)        | 11.0 (10.5 to 11.6)        | 9.3 (8.6 to 10.0)          | -1.4 (-1.7 to -1.0)                            | -18.5 (-22.3 to -14.3)              |
| <b>Caribbean</b>                    |                            |                            |                            |                            |                                                |                                     |
| Antigua and Barbuda                 | 7.5 (6.4 to 8.9)           | 7.1 (6.1 to 8.3)           | 7.0 (6.0 to 8.3)           | 6.6 (5.6 to 7.9)           | -0.4 (-0.8 to -0.0)                            | -4.4 (-11.5 to -0.3)                |
| The Bahamas                         | 7.7 (6.5 to 9.0)           | 7.3 (6.2 to 8.5)           | 7.3 (6.2 to 8.6)           | 7.0 (5.8 to 8.4)           | -0.3 (-0.7 to 0.1)                             | -4.3 (-10.2 to 0.9)                 |
| Barbados                            | 7.4 (6.3 to 8.8)           | 7.1 (6.1 to 8.3)           | 7.1 (6.0 to 8.3)           | 6.8 (5.7 to 8.2)           | -0.3 (-0.6 to 0.1)                             | -4.2 (-9.0 to 1.7)                  |
| Belize                              | 10.4 (8.8 to 12.3)         | 9.3 (8.0 to 11.0)          | 9.2 (7.9 to 10.9)          | 8.5 (7.1 to 10.1)          | -0.7 (-1.0 to -0.3)                            | -9.5 (-14.2 to -4.7)                |
| Bermuda                             | 6.2 (5.2 to 7.3)           | 5.8 (4.9 to 6.8)           | 5.7 (4.8 to 6.7)           | 5.3 (4.4 to 6.3)           | -0.5 (-0.9 to -0.2)                            | -7.6 (-12.8 to -2.5)                |
| Cuba                                | 8.2 (7.0 to 9.7)           | 7.4 (6.3 to 8.6)           | 7.2 (6.2 to 8.5)           | 6.6 (5.6 to 7.8)           | -0.8 (-1.1 to -0.4)                            | -10.6 (-15.1 to -6.3)               |
| Dominica                            | 8.2 (6.9 to 9.5)           | 7.7 (6.6 to 9.1)           | 7.6 (6.5 to 9.0)           | 7.2 (6.0 to 8.6)           | -0.5 (-0.9 to -0.2)                            | -7.5 (-13.2 to -2.6)                |
| Dominican Republic                  | 12.5 (11.2 to 14.2)        | 11.8 (10.7 to 12.8)        | 11.7 (10.6 to 12.9)        | 11.2 (9.8 to 12.7)         | -0.3 (-0.8 to 0.2)                             | -4.4 (-10.9 to 3.1)                 |
| Grenada                             | 8.8 (7.5 to 10.3)          | 8.0 (6.8 to 9.4)           | 7.9 (6.8 to 9.4)           | 7.3 (6.2 to 8.8)           | -0.6 (-1.0 to -0.2)                            | -8.6 (-14.4 to -3.1)                |
| Guyana                              | 10.3 (8.8 to 12.1)         | 9.4 (8.1 to 11.1)          | 9.3 (7.9 to 11.0)          | 8.4 (7.0 to 10.1)          | -0.8 (-1.2 to -0.4)                            | -10.7 (-15.9 to -6.2)               |
| Haiti                               | 17.6 (16.2 to 19.2)        | 15.5 (14.3 to 17.0)        | 15.5 (14.2 to 17.2)        | 14.4 (12.8 to 16.4)        | -0.5 (-0.9 to -0.1)                            | -7.3 (-13.1 to -1.9)                |
| Jamaica                             | 7.4 (6.5 to 8.3)           | 7.0 (6.2 to 7.8)           | 7.0 (6.2 to 7.9)           | 6.8 (5.8 to 7.8)           | -0.2 (-0.6 to 0.2)                             | -3.2 (-9.0 to 3.8)                  |
| Puerto Rico                         | 5.2 (4.6 to 5.8)           | 4.7 (4.1 to 5.3)           | 4.6 (4.0 to 5.2)           | 4.2 (3.6 to 4.9)           | -0.7 (-1.1 to -0.3)                            | -9.7 (-15.0 to -4.1)                |
| Saint Lucia                         | 9.1 (7.8 to 10.7)          | 8.4 (7.2 to 9.8)           | 8.3 (7.1 to 9.8)           | 7.7 (6.5 to 9.2)           | -0.6 (-1.0 to -0.2)                            | -8.4 (-14.3 to -3.0)                |
| Saint Vincent and the Grenadines    | 9.9 (8.5 to 11.7)          | 9.2 (7.8 to 10.8)          | 9.1 (7.7 to 10.7)          | 8.5 (7.1 to 10.2)          | -0.5 (-0.9 to -0.1)                            | -7.2 (-12.5 to -1.7)                |
| Suriname                            | 9.0 (7.6 to 10.5)          | 8.2 (7.0 to 9.7)           | 8.2 (6.9 to 9.6)           | 7.6 (6.4 to 9.1)           | -0.5 (-0.9 to -0.2)                            | -7.6 (-12.1 to -3.0)                |
| Trinidad and Tobago                 | 8.4 (7.1 to 9.9)           | 8.1 (6.9 to 9.5)           | 8.0 (6.8 to 9.4)           | 7.7 (6.4 to 9.1)           | -0.3 (-0.7 to 0.0)                             | -4.7 (-9.7 to 0.2)                  |
| Virgin Islands, U.S.                | 5.3 (4.7 to 6.0)           | 4.8 (4.3 to 5.4)           | 4.9 (4.3 to 5.5)           | 4.6 (4.1 to 5.3)           | -0.3 (-0.7 to 0.1)                             | -4.3 (-9.3 to 1.1)                  |
| <b>Central Latin America</b>        |                            |                            |                            |                            |                                                |                                     |
| Colombia                            | 17.0 (15.2 to 19.1)        | 15.1 (14.0 to 16.0)        | 14.7 (13.3 to 15.8)        | 13.1 (11.3 to 14.5)        | -1.0 (-1.5 to -0.5)                            | -13.3 (-19.7 to -7.4)               |
| Costa Rica                          | 12.8 (11.5 to 14.5)        | 11.6 (10.4 to 12.9)        | 11.4 (10.2 to 12.7)        | 10.4 (9.2 to 11.7)         | -0.8 (-1.2 to -0.4)                            | -10.7 (-14.8 to -6.3)               |
| El Salvador                         | 9.7 (8.7 to 10.8)          | 8.3 (7.5 to 9.2)           | 8.3 (7.5 to 9.2)           | 7.6 (6.7 to 8.5)           | -0.6 (-1.0 to -0.1)                            | -8.7 (-14.2 to -1.7)                |
| Guatemala                           | 9.4 (8.4 to 10.4)          | 8.3 (7.7 to 9.0)           | 8.3 (7.5 to 9.2)           | 7.6 (6.6 to 8.6)           | -0.6 (-1.1 to -0.2)                            | -8.9 (-14.9 to -2.5)                |
| Honduras                            | 9.4 (8.7 to 10.3)          | 9.0 (8.3 to 9.8)           | 8.9 (8.2 to 9.8)           | 8.4 (7.5 to 9.5)           | -0.4 (-0.9 to -0.0)                            | -6.0 (-12.2 to -0.4)                |
| Mexico                              | 4.5 (3.8 to 5.2)           | 4.5 (3.9 to 5.2)           | 4.5 (3.9 to 5.2)           | 4.5 (3.8 to 5.2)           | 0.0 (-0.1 to 0.2)                              | 0.2 (-1.9 to 2.4)                   |
| Nicaragua                           | 10.0 (9.2 to 10.8)         | 7.8 (7.1 to 8.6)           | 7.9 (7.1 to 8.9)           | 7.0 (6.0 to 8.2)           | -0.7 (-1.3 to -0.2)                            | -10.0 (-17.5 to -3.0)               |
| Panama                              | 8.8 (7.5 to 10.3)          | 8.3 (7.1 to 9.7)           | 8.0 (6.8 to 9.3)           | 7.2 (6.1 to 8.5)           | -0.9 (-1.2 to -0.6)                            | -12.8 (-17.1 to -7.9)               |
| Venezuela                           | 9.4 (8.0 to 11.1)          | 8.8 (7.5 to 10.4)          | 8.7 (7.4 to 10.2)          | 8.1 (6.8 to 9.7)           | -0.6 (-1.0 to -0.2)                            | -8.2 (-13.3 to -2.7)                |
| <b>Tropical Latin America</b>       |                            |                            |                            |                            |                                                |                                     |
| Brazil                              | 8.6 (7.7 to 9.7)           | 7.3 (6.5 to 8.2)           | 7.2 (6.4 to 8.0)           | 6.2 (5.6 to 7.0)           | -1.1 (-1.2 to -1.0)                            | -14.9 (-16.0 to -13.6)              |
| Paraguay                            | 7.9 (7.1 to 8.9)           | 7.1 (6.4 to 8.0)           | 7.0 (6.2 to 7.9)           | 6.4 (5.5 to 7.5)           | -0.7 (-1.2 to -0.2)                            | -10.3 (-16.5 to -3.3)               |
| <b>North Africa and Middle East</b> |                            |                            |                            |                            |                                                |                                     |
| <b>North Africa and Middle East</b> |                            |                            |                            |                            |                                                |                                     |
| Afghanistan                         | 53.7 (48.3 to 59.6)        | 39.8 (36.9 to 44.0)        | 39.1 (36.0 to 43.6)        | 31.9 (28.4 to 37.0)        | -1.5 (-2.0 to -1.0)                            | -19.8 (-25.6 to -13.3)              |
| Algeria                             | 18.2 (15.7 to 21.1)        | 14.8 (12.7 to 17.0)        | 14.5 (12.5 to 16.7)        | 12.3 (10.5 to 14.3)        | -1.2 (-1.6 to -0.8)                            | -16.5 (-21.0 to -11.9)              |
| Bahrain                             | 16.6 (14.4 to 19.3)        | 14.9 (12.8 to 17.2)        | 14.8 (12.7 to 17.1)        | 13.7 (11.6 to 16.0)        | -0.6 (-0.9 to -0.2)                            | -8.4 (-13.1 to -3.5)                |
| Egypt                               | 15.7 (14.4 to 17.0)        | 13.4 (12.3 to 14.8)        | 13.0 (11.8 to 14.6)        | 11.2 (9.7 to 13.2)         | -1.2 (-1.8 to -0.7)                            | -16.6 (-23.3 to -9.4)               |
| Iran                                | 20.7 (18.5 to 23.1)        | 17.2 (15.3 to 19.2)        | 17.1 (15.2 to 19.0)        | 14.8 (13.2 to 16.5)        | -1.0 (-1.1 to -0.9)                            | -14.0 (-15.2 to -12.8)              |
| Iraq                                | 32.7 (29.4 to 36.6)        | 28.2 (25.7 to 30.9)        | 28.1 (25.1 to 31.3)        | 25.5 (22.0 to 29.4)        | -0.7 (-1.2 to -0.2)                            | -9.5 (-16.7 to -2.6)                |
| Jordan                              | 13.8 (12.3 to 15.4)        | 11.6 (10.8 to 12.6)        | 11.5 (10.5 to 12.7)        | 10.1 (9.1 to 11.4)         | -0.9 (-1.3 to -0.6)                            | -13.0 (-17.9 to -8.2)               |
| Kuwait                              | 15.4 (13.3 to 17.9)        | 12.7 (11.0 to 14.6)        | 12.5 (10.8 to 14.4)        | 10.6 (9.1 to 12.3)         | -1.2 (-1.5 to -0.8)                            | -16.4 (-20.6 to -11.8)              |
| Lebanon                             | 20.1 (17.2 to 23.3)        | 16.1 (13.9 to 18.5)        | 15.8 (13.7 to 18.2)        | 13.2 (11.3 to 15.4)        | -1.3 (-1.7 to -1.0)                            | -18.1 (-22.0 to -14.1)              |
| Libya                               | 16.9 (14.5 to 19.7)        | 15.4 (13.2 to 17.7)        | 15.5 (13.3 to 18.0)        | 14.8 (12.6 to 17.5)        | -0.3 (-0.6 to 0.1)                             | -3.7 (-8.5 to 1.1)                  |
| Morocco                             | 21.1 (18.2 to 24.1)        | 18.1 (15.5 to 20.8)        | 17.7 (15.1 to 20.5)        | 15.5 (13.1 to 18.2)        | -1.0 (-1.4 to -0.7)                            | -14.3 (-19.1 to -9.3)               |
| Palestine                           | 22.9 (19.8 to 26.5)        | 20.0 (17.1 to 23.1)        | 19.5 (16.6 to 22.5)        | 16.8 (14.0 to 19.6)        | -1.2 (-1.7 to -0.8)                            | -16.2 (-21.9 to -11.5)              |
| Oman                                | 16.0 (13.7 to 18.4)        | 13.1 (11.3 to 15.2)        | 12.9 (11.1 to 14.9)        | 10.9 (9.3 to 12.8)         | -1.2 (-1.6 to -0.9)                            | -16.5 (-21.1 to -12.5)              |
| Qatar                               | 14.5 (12.5 to 16.8)        | 13.4 (11.5 to 15.4)        | 13.2 (11.4 to 15.2)        | 12.1 (10.3 to 14.1)        | -0.7 (-1.0 to -0.3)                            | -9.4 (-14.0 to -4.3)                |
| Saudi Arabia                        | 14.8 (12.6 to 17.1)        | 11.7 (10.1 to 13.4)        | 11.3 (9.8 to 13.1)         | 9.3 (7.9 to 10.8)          | -1.6 (-1.9 to -1.2)                            | -20.7 (-24.4 to -16.7)              |
| Sudan                               | 25.0 (21.5 to 29.1)        | 21.8 (18.8 to 25.2)        | 20.9 (18.0 to 24.2)        | 17.6 (14.9 to 20.4)        | -1.4 (-1.9 to -1.0)                            | -19.5 (-24.4 to -14.5)              |
| Syria                               | 22.8 (19.6 to 26.4)        | 18.1 (15.6 to 20.9)        | 17.9 (15.3 to 20.6)        | 15.1 (12.8 to 17.7)        | -1.2 (-1.6 to -0.9)                            | -17.1 (-21.1 to -13.0)              |
| Tunisia                             | 17.7 (15.3 to 20.4)        | 14.8 (12.8 to 17.2)        | 14.6 (12.6 to 16.9)        | 12.7 (10.8 to 14.9)        | -1.1 (-1.4 to -0.7)                            | -14.7 (-19.1 to -10.0)              |
| Turkey                              | 15.9 (14.2 to 17.9)        | 12.3 (11.2 to 13.6)        | 12.2 (10.9 to 13.6)        | 10.4 (8.9 to 12.0)         | -1.2 (-1.7 to -0.6)                            | -15.9 (-22.0 to -8.8)               |
| United Arab Emirates                | 14.6 (12.6 to 16.8)        | 13.2 (11.3 to 15.3)        | 13.1 (11.1 to 15.3)        | 12.0 (10.0 to 14.1)        | -0.6 (-1.0 to -0.3)                            | -9.1 (-13.9 to -4.7)                |
| Yemen                               | 30.4 (26.2 to 35.0)        | 24.4 (20.9 to 28.2)        | 24.1 (20.6 to 27.8)        | 20.3 (17.3 to 23.8)        | -1.2 (-1.6 to -0.8)                            | -16.6 (-21.4 to -11.7)              |
| <b>South Asia</b>                   |                            |                            |                            |                            |                                                |                                     |
| <b>South Asia</b>                   |                            |                            |                            |                            |                                                |                                     |
| Bangladesh                          | 27.1 (24.2 to 30.4)        | 21.8 (19.7 to 24.1)        | 21.5 (19.3 to 24.1)        | 18.5 (16.1 to 21.1)        | -1.1 (-1.6 to -0.7)                            | -15.2 (-21.0 to -9.3)               |
| Bhutan                              | 16.0 (14.4 to 17.9)        | 12.4 (11.2 to 13.8)        | 12.3 (11.0 to 13.7)        | 10.5 (9.1 to 12.2)         | -1.1 (-1.6 to -0.6)                            | -15.1 (-21.2 to -8.3)               |
| India                               | 18.8 (17.0 to 20.9)        | 18.0 (16.1 to 20.1)        | 18.1 (16.2 to 20.4)        | 17.8 (15.7 to 20.2)        | -0.1 (-0.3 to 0.2)                             | -1.0 (-4.1 to 2.5)                  |



|                                               | Estimate in 2000 (95% UIs) | Estimate in 2015 (95% UIs) | Estimate in 2017 (95% UIs) | Estimate in 2020 (95% UIs) | Annualised rate of change, 2015-2020 (95% UIs) | Percent change, 2015-2020 (95% UIs) |
|-----------------------------------------------|----------------------------|----------------------------|----------------------------|----------------------------|------------------------------------------------|-------------------------------------|
| Nepal                                         | 15.7 (13.9 to 17.6)        | 12.7 (11.5 to 14.2)        | 12.6 (11.4 to 14.2)        | 11.0 (9.6 to 12.5)         | -1.0 (-1.4 to -0.6)                            | -13.7 (-18.4 to -8.4)               |
| Pakistan                                      | 28.9 (25.8 to 32.6)        | 22.7 (20.8 to 25.1)        | 22.3 (20.4 to 24.7)        | 18.5 (16.6 to 20.8)        | -1.4 (-1.8 to -1.0)                            | -18.6 (-23.5 to -13.5)              |
| <b>Southeast Asia, East Asia, and Oceania</b> |                            |                            |                            |                            |                                                |                                     |
| <b>East Asia</b>                              |                            |                            |                            |                            |                                                |                                     |
| China                                         | 14.5 (13.0 to 16.2)        | 12.3 (11.0 to 13.7)        | 12.0 (10.7 to 13.4)        | 10.5 (9.4 to 11.7)         | -1.1 (-1.1 to -1.0)                            | -14.9 (-15.8 to -14.0)              |
| North Korea                                   | 14.8 (13.1 to 16.8)        | 15.9 (14.0 to 17.8)        | 15.8 (13.9 to 17.8)        | 0.3 (0.1 to 0.6)           | 0.3 (-0.1 to 0.6)                              | 3.9 (-1.7 to 9.8)                   |
| Taiwan (Province of China)                    | 10.2 (9.0 to 11.6)         | 9.1 (8.1 to 10.3)          | 9.1 (8.0 to 10.3)          | 8.6 (7.4 to 9.8)           | -0.4 (-0.8 to -0.1)                            | -6.1 (-10.9 to -1.3)                |
| <b>Oceania</b>                                |                            |                            |                            |                            |                                                |                                     |
| American Samoa                                | 13.0 (11.5 to 14.8)        | 12.1 (10.7 to 13.8)        | 12.1 (10.6 to 13.7)        | 11.6 (10.1 to 13.4)        | -0.3 (-0.7 to 0.0)                             | -4.6 (-9.5 to 0.7)                  |
| Federated States of Micronesia                | 15.7 (13.9 to 17.8)        | 13.5 (13.5 to 17.3)        | 15.2 (13.4 to 17.2)        | 14.8 (12.9 to 17.0)        | -0.2 (-0.6 to 0.1)                             | -3.2 (-8.4 to 1.9)                  |
| Fiji                                          | 14.9 (13.1 to 16.8)        | 13.9 (12.3 to 15.6)        | 13.8 (12.2 to 15.6)        | 13.1 (11.5 to 15.0)        | -0.4 (-0.8 to -0.0)                            | -5.7 (-10.7 to -0.5)                |
| Guam                                          | 10.6 (9.3 to 12.0)         | 10.5 (9.3 to 12.0)         | 10.4 (9.2 to 11.8)         | 10.3 (8.9 to 11.8)         | -0.2 (-0.5 to 0.2)                             | -2.3 (-7.1 to 2.5)                  |
| Kiribati                                      | 17.2 (15.2 to 19.4)        | 16.8 (14.8 to 18.7)        | 16.5 (14.5 to 18.8)        | 15.9 (13.8 to 18.3)        | -0.4 (-0.7 to -0.1)                            | -5.6 (-10.6 to -0.8)                |
| Marshall Islands                              | 16.7 (14.8 to 18.9)        | 15.6 (13.8 to 17.6)        | 15.4 (13.5 to 17.5)        | 14.4 (12.5 to 16.6)        | -0.6 (-0.9 to -0.2)                            | -7.9 (-12.3 to -2.7)                |
| Northern Mariana Islands                      | 10.8 (9.6 to 12.3)         | 11.1 (9.8 to 12.7)         | 11.2 (9.8 to 12.8)         | 11.5 (9.9 to 13.2)         | 0.2 (0.1 to 0.6)                               | 3.4 (-2.0 to 8.9)                   |
| Papua New Guinea                              | 19.2 (16.9 to 22.0)        | 18.8 (16.6 to 21.3)        | 18.6 (16.4 to 20.9)        | 17.8 (15.6 to 20.4)        | -0.4 (-0.7 to -0.1)                            | -5.4 (-10.3 to -0.8)                |
| Samoa                                         | 14.8 (13.0 to 16.8)        | 14.4 (12.7 to 16.2)        | 14.3 (12.6 to 16.2)        | 13.9 (12.6 to 16.1)        | -0.2 (-0.6 to 0.1)                             | -3.0 (-8.6 to 1.9)                  |
| Solomon Islands                               | 19.0 (16.8 to 21.5)        | 18.7 (16.6 to 21.1)        | 18.4 (16.2 to 20.7)        | 17.5 (15.3 to 20.0)        | -0.4 (-0.8 to -0.1)                            | -6.4 (-11.1 to -2.1)                |
| Tonga                                         | 14.1 (12.5 to 16.1)        | 13.3 (11.8 to 15.1)        | 13.2 (11.6 to 15.0)        | 12.5 (10.9 to 14.4)        | -0.4 (-0.8 to -0.1)                            | -6.4 (-11.2 to -1.3)                |
| Vanuatu                                       | 16.1 (14.2 to 18.2)        | 15.5 (13.7 to 17.6)        | 15.4 (13.5 to 17.4)        | 14.7 (12.8 to 17.0)        | -0.3 (-0.7 to 0.0)                             | -5.0 (-10.0 to 0.2)                 |
| <b>Southeast Asia</b>                         |                            |                            |                            |                            |                                                |                                     |
| Cambodia                                      | 11.8 (10.8 to 13.1)        | 9.4 (8.6 to 10.5)          | 9.4 (8.6 to 10.5)          | 8.1 (7.2 to 9.2)           | -1.0 (-1.4 to -0.7)                            | -14.5 (-18.6 to -10.1)              |
| Indonesia                                     | 13.1 (11.5 to 14.8)        | 11.2 (9.9 to 12.8)         | 11.0 (9.7 to 12.4)         | 9.5 (8.4 to 10.8)          | -1.1 (-1.2 to -1.0)                            | -15.2 (-16.8 to -13.3)              |
| Laos                                          | 14.5 (12.3 to 17.1)        | 11.8 (9.9 to 13.9)         | 11.4 (9.6 to 13.6)         | 9.5 (7.8 to 11.4)          | -1.5 (-1.8 to -1.1)                            | -19.6 (-23.8 to -14.9)              |
| Malaysia                                      | 10.5 (8.8 to 12.3)         | 8.9 (7.5 to 10.5)          | 8.7 (7.4 to 10.3)          | 7.5 (6.3 to 8.9)           | -1.1 (-1.5 to -0.8)                            | -15.4 (-20.1 to -10.9)              |
| Maldives                                      | 15.0 (12.6 to 17.7)        | 10.2 (8.6 to 12.0)         | 9.9 (8.4 to 11.7)          | 7.6 (6.3 to 9.0)           | -2.0 (-2.3 to -1.6)                            | -25.9 (-29.5 to -21.6)              |
| Mauritius                                     | 11.1 (9.3 to 13.1)         | 9.9 (8.3 to 11.6)          | 9.7 (8.1 to 11.4)          | 8.6 (7.2 to 10.2)          | -0.9 (-1.2 to -0.5)                            | -12.8 (-17.1 to -7.7)               |
| Myanmar                                       | 14.5 (12.9 to 16.3)        | 10.8 (9.6 to 12.1)         | 10.6 (9.6 to 11.9)         | 8.5 (7.5 to 9.7)           | -1.6 (-2.0 to -1.2)                            | -21.3 (-25.7 to -16.6)              |
| Philippines                                   | 8.9 (7.9 to 10.0)          | 7.5 (6.8 to 8.3)           | 7.4 (6.7 to 8.3)           | 6.5 (6.7 to 7.5)           | -0.9 (-1.4 to -0.5)                            | -12.8 (-18.4 to -7.3)               |
| Sri Lanka                                     | 18.8 (16.7 to 21.2)        | 15.1 (13.5 to 17.0)        | 14.7 (13.1 to 16.6)        | 12.2 (10.7 to 13.9)        | -1.5 (-1.9 to -1.1)                            | -19.7 (-24.3 to -15.5)              |
| Seychelles                                    | 12.6 (10.6 to 14.8)        | 10.8 (9.1 to 12.8)         | 10.7 (8.9 to 12.6)         | 9.4 (7.8 to 11.3)          | -0.9 (-1.3 to -0.6)                            | -13.2 (-18.3 to -8.4)               |
| Thailand                                      | 13.8 (11.6 to 16.3)        | 11.1 (9.3 to 12.9)         | 10.9 (9.2 to 12.8)         | 9.2 (7.7 to 10.9)          | -1.2 (-1.6 to -0.8)                            | -16.6 (-21.1 to -11.6)              |
| Timor-Leste                                   | 26.9 (24.0 to 30.2)        | 20.6 (18.6 to 22.8)        | 20.1 (17.9 to 22.6)        | 16.1 (13.9 to 18.6)        | -1.6 (-2.2 to -1.2)                            | -21.8 (-27.6 to -16.0)              |
| Vietnam                                       | 11.6 (10.4 to 13.0)        | 9.6 (8.6 to 10.7)          | 9.5 (8.5 to 10.7)          | 8.3 (7.2 to 9.6)           | -0.9 (-1.4 to -0.4)                            | -13.0 (-19.2 to -6.1)               |
| <b>Sub-Saharan Africa</b>                     |                            |                            |                            |                            |                                                |                                     |
| <b>Central Sub-Saharan Africa</b>             |                            |                            |                            |                            |                                                |                                     |
| Angola                                        | 36.0 (31.7 to 40.7)        | 29.6 (26.2 to 33.4)        | 28.3 (25.1 to 32.2)        | 22.7 (19.8 to 26.1)        | -1.8 (-2.1 to -1.4)                            | -23.4 (-27.2 to -19.0)              |
| Central African Republic                      | 24.0 (21.6 to 27.0)        | 21.6 (19.5 to 24.1)        | 21.9 (19.5 to 24.7)        | 20.9 (18.5 to 24.3)        | -0.2 (-0.6 to 0.3)                             | -3.1 (-8.9 to 4.0)                  |
| Congo                                         | 29.9 (26.5 to 33.9)        | 24.5 (21.6 to 27.0)        | 23.8 (21.0 to 27.0)        | 19.7 (17.2 to 22.0)        | -1.4 (-1.8 to -1.1)                            | -19.5 (-23.8 to -14.9)              |
| Democratic Republic of the Congo              | 42.8 (38.5 to 47.8)        | 36.9 (33.2 to 41.2)        | 35.1 (31.2 to 39.6)        | 28.7 (25.9 to 34.0)        | -1.7 (-2.4 to -1.1)                            | -22.4 (-29.9 to -14.7)              |
| Equatorial Guinea                             | 31.1 (27.2 to 35.5)        | 20.8 (18.3 to 23.5)        | 20.2 (17.8 to 23.0)        | 14.9 (13.0 to 17.4)        | -2.2 (-2.6 to -1.8)                            | -28.1 (-32.6 to -23.6)              |
| Gabon                                         | 33.0 (29.6 to 37.0)        | 27.9 (25.8 to 30.5)        | 27.4 (25.2 to 30.0)        | 23.6 (21.4 to 26.4)        | -1.1 (-1.5 to -0.7)                            | -15.4 (-20.4 to -10.0)              |
| <b>Eastern Sub-Saharan Africa</b>             |                            |                            |                            |                            |                                                |                                     |
| Burundi                                       | 24.2 (21.7 to 27.0)        | 23.0 (20.7 to 25.8)        | 22.8 (20.5 to 25.5)        | 21.7 (19.2 to 24.8)        | -0.4 (-0.7 to -0.0)                            | -5.9 (-10.6 to -0.7)                |
| Comoros                                       | 16.3 (14.7 to 18.2)        | 13.5 (12.2 to 15.0)        | 13.3 (11.9 to 14.8)        | 11.6 (10.3 to 13.1)        | -1.0 (-1.3 to -0.7)                            | -14.1 (-18.1 to -9.4)               |
| Djibouti                                      | 23.8 (21.2 to 26.6)        | 20.7 (18.5 to 23.0)        | 20.2 (18.1 to 22.5)        | 17.8 (15.7 to 20.3)        | -1.0 (-1.3 to -0.6)                            | -13.9 (-18.1 to -9.3)               |
| Eritrea                                       | 26.7 (23.9 to 29.8)        | 24.3 (21.8 to 27.1)        | 23.9 (21.3 to 26.7)        | 21.7 (19.1 to 24.7)        | -0.8 (-1.2 to -0.4)                            | -10.8 (-16.0 to -6.0)               |
| Ethiopia                                      | 38.5 (34.6 to 42.6)        | 30.4 (27.4 to 33.8)        | 29.3 (26.4 to 32.6)        | 23.2 (20.8 to 25.9)        | -1.8 (-2.0 to -1.6)                            | -23.7 (-26.1 to -21.2)              |
| Kenya                                         | 23.1 (20.1 to 26.6)        | 22.7 (20.1 to 25.8)        | 22.7 (20.1 to 25.7)        | 22.4 (19.9 to 25.2)        | -0.1 (-0.2 to 0.1)                             | -1.3 (-3.3 to 1.1)                  |
| Madagascar                                    | 25.9 (23.2 to 29.0)        | 24.0 (21.6 to 26.7)        | 23.5 (21.1 to 26.2)        | 22.0 (19.5 to 24.9)        | -0.6 (-0.9 to -0.2)                            | -8.1 (-12.6 to -3.2)                |
| Malawi                                        | 19.8 (17.9 to 22.2)        | 18.1 (16.7 to 19.5)        | 18.2 (16.5 to 19.8)        | 17.3 (14.9 to 19.4)        | -0.3 (-0.9 to 0.2)                             | -4.9 (-12.7 to 2.7)                 |
| Mozambique                                    | 24.8 (22.3 to 27.5)        | 21.1 (19.3 to 23.0)        | 20.2 (18.1 to 22.5)        | 17.1 (14.9 to 19.6)        | -1.4 (-1.9 to -0.9)                            | -19.0 (-24.5 to -12.6)              |
| Rwanda                                        | 30.1 (27.0 to 33.8)        | 25.3 (22.9 to 28.1)        | 24.8 (22.2 to 27.8)        | 20.9 (18.1 to 24.2)        | -1.3 (-1.8 to -0.8)                            | -17.3 (-23.6 to -11.4)              |
| Somalia                                       | 30.8 (27.4 to 34.4)        | 27.4 (24.6 to 30.7)        | 27.2 (24.3 to 30.5)        | 24.9 (22.0 to 28.6)        | -0.7 (-1.0 to -0.3)                            | -9.4 (-13.9 to -4.1)                |
| South Sudan                                   | 30.7 (27.6 to 34.5)        | 28.4 (25.6 to 31.7)        | 28.1 (25.2 to 31.4)        | 26.2 (23.2 to 29.7)        | -0.6 (-0.9 to -0.2)                            | -7.9 (-12.1 to -3.1)                |
| Tanzania                                      | 30.2 (27.1 to 33.7)        | 25.7 (23.9 to 27.8)        | 25.1 (23.3 to 27.7)        | 21.9 (19.7 to 25.1)        | -1.1 (-1.6 to -0.6)                            | -14.9 (-20.9 to -8.7)               |
| Uganda                                        | 39.1 (35.2 to 43.6)        | 30.4 (27.8 to 33.1)        | 30.2 (27.0 to 33.7)        | 25.6 (23.8 to 29.1)        | -1.1 (-1.7 to -0.6)                            | -15.6 (-22.8 to -8.3)               |
| Zambia                                        | 31.1 (28.2 to 34.5)        | 25.4 (23.3 to 28.1)        | 24.4 (22.1 to 27.3)        | 19.7 (17.0 to 23.0)        | -1.7 (-2.3 to -1.2)                            | -22.7 (-29.0 to -16.2)              |
| <b>Southern Sub-Saharan Africa</b>            |                            |                            |                            |                            |                                                |                                     |
| Botswana                                      | 17.2 (15.1 to 19.7)        | 14.8 (12.9 to 16.8)        | 14.5 (12.7 to 16.4)        | 12.9 (11.1 to 14.8)        | -0.9 (-1.3 to -0.5)                            | -12.8 (-17.3 to -7.4)               |
| Lesotho                                       | 23.6 (20.7 to 27.0)        | 20.5 (18.0 to 23.6)        | 20.2 (17.7 to 23.1)        | 17.9 (15.5 to 20.7)        | -0.9 (-1.3 to -0.6)                            | -13.0 (-17.6 to -8.1)               |
| Namibia                                       | 25.3 (22.5 to 28.4)        | 21.1 (19.0 to 23.4)        | 20.7 (18.5 to 23.1)        | 17.7 (15.6 to 20.1)        | -1.2 (-1.6 to -0.8)                            | -16.3 (-21.4 to -11.0)              |
| South Africa                                  | 10.0 (8.8 to 11.6)         | 9.9 (8.7 to 11.4)          | 9.9 (8.7 to 11.4)          | 10.0 (8.8 to 11.4)         | 0.1 (0.1 to 0.2)                               | 1.2 (-1.4 to 3.8)                   |
| Swaziland                                     | 19.7 (17.3 to 22.3)        | 17.2 (15.2 to 19.6)        | 16.9 (14.8 to 19.3)        | 15.0 (12.9 to 17.3)        | -0.9 (-1.3 to -0.6)                            | -12.9 (-17.5 to -8.5)               |
| Zimbabwe                                      | 22.1 (20.4 to 24.1)        | 21.2 (19.4 to 23.1)        | 20.7 (18.5 to 23.4)        | 19.4 (16.1 to 23.2)        | -0.6 (-1.4 to 0.1)                             | -8.5 (-18.8 to 1.5)                 |
| <b>Western Sub-Saharan Africa</b>             |                            |                            |                            |                            |                                                |                                     |
| Benin                                         | 20.8 (18.0 to 23.8)        | 18.2 (15.8 to 20.8)        | 17.8 (15.4 to 20.5)        | 15.7 (13.5 to 18.1)        | -1.0 (-1.3 to -0.7)                            | -13.8 (-17.9 to -9.4)               |
| Burkina Faso                                  | 13.0 (11.7 to 14.6)        | 11.2 (10.1 to 12.4)        | 11.2 (10.1 to 12.6)        | 10.5 (9.2 to 12.0)         | -0.4 (-0.8 to 0.0)                             | -6.2 (-11.7 to 0.7)                 |
| Cameroon                                      | 26.6 (24.5 to 29.4)        | 24.4 (22.3 to 26.9)        | 23.2 (20.9 to 26.1)        | 20.5 (17.9 to 23.3)        | -1.2 (-1.6 to -0.6)                            | -16.1 (-21.5 to -9.1)               |
| Cape Verde                                    | 19.5 (16.9 to 22.5)        | 15.9 (13.8 to 18.2)        | 15.6 (13.5 to 17.8)        | 13.2 (11.3 to 15.3)        | -1.2 (-1.6 to -0.9)                            | -17.0 (-21.5 to -12.2)              |
| Chad                                          | 19.8 (17.7 to 22.1)        | 16.2 (15.1 to 17.8)        | 15.9 (14.5 to 17.8)        | 13.6 (11.8 to 15.8)        | -1.2 (-1.7 to -0.7)                            | -16.6 (-23.0 to -9.5)               |
| Cote d'Ivoire                                 | 20.2 (18.1 to 22.7)        | 17.8 (16.5 to 19.4)        | 17.4 (16.0 to 19.0)        | 15.5 (14.0 to 17.0)        | -0.9 (-1.3 to -0.5)                            | -13.0 (-17.9 to -7.9)               |
| The Gambia                                    | 10.9 (9.8 to 12.2)         | 9.0 (8.1 to 10.1)          | 8.9 (8.0 to 10.1)          | 7.8 (6.8 to 8.9)           | -1.0 (-1.4 to -0.7)                            | -14.2 (-18.8 to -9.6)               |
| Ghana                                         | 17.8 (16.0 to 19.9)        | 14.9 (13.5 to 16.6)        | 14.6 (13.0 to 16.3)        | 12.6 (10.9 to 14.3)        | -1.2 (-1.5 to -0.8)                            | -15.9 (-20.6 to -11.0)              |
| Guinea                                        | 22.6 (19.7 to 26.0)        | 19.9 (17.2 to 22.8)        | 19.4 (16.8 to 22.2)        | 17.0 (14.6 to 19.9)        | -1.0 (-1.4 to -0.7)                            | -14.5 (-19.4 to -9.9)               |
| Guinea-Bissau                                 | 23.6 (20.5 to 27.1)        | 20.6 (18.1 to 23.6)        | 20.1 (17.5 to 23.1)        | 17.7 (15.3 to 20.4)        | -1.0 (-1.3 to -0.7)                            | -14.0 (-18.3 to -9.5)               |
| Liberia                                       | 34.0 (30.6 to 38.0)        | 28.2 (25.7 to 30.9)        | 27.7 (24.9 to 30.9)        | 24.5 (21.1 to 28.2)        | -0.9 (-1.5 to -0.4)                            | -13.0 (-19.6 to -6.1)               |
| Mali                                          | 25.3 (22.7 to 28.3)        | 21.9 (20.4 to 23.8)        | 21.5 (19.9 to 23.5)        | 19.0 (17.1 to 21.0)        | -0.9 (-1.3 to -0.6)                            | -13.2 (-17.8 to -8.2)               |
| Mauritania                                    | 17.8 (15.5 to 20.4)        | 15.4 (13.4 to 17.7)        | 15.1 (13.1 to 17.4)        | 13.2 (11.2 to 15.4)        | -1.0 (-1.4 to -0.6)                            | -14.4 (-18.9 to -9.2)               |
| Niger                                         | 25.3 (21.9 to 28.9)        | 23.3 (20.2 to 26.7)        | 22.9 (19.9 to 26.3)        | 21.0 (17.9 to 24.6)        | -0.7 (-1.1 to -0.3)                            | -9.6 (-14.9 to -4.5)                |

|                                                                                                                                                                                    | Estimate in 2000 (95% UIs) | Estimate in 2015 (95% UIs) | Estimate in 2017 (95% UIs) | Estimate in 2020 (95% UIs) | Annualised rate of change, 2015-2020 (95% UIs) | Percent change, 2015-2020 (95% UIs) |
|------------------------------------------------------------------------------------------------------------------------------------------------------------------------------------|----------------------------|----------------------------|----------------------------|----------------------------|------------------------------------------------|-------------------------------------|
| Nigeria                                                                                                                                                                            | 12.7 (11.4 to 14.2)        | 10.9 (9.2 to 11.9)         | 9.3 (9.9 to 11.1)          | 8.2 (7.1 to 9.8)           | -1.3 (-1.9 to -0.8)                            | -18.0 (-25.1 to -10.7)              |
| San Tome and Principe                                                                                                                                                              | 25.0 (23.4 to 28.1)        | 20.6 (18.6 to 22.7)        | 20.1 (18.0 to 22.4)        | 17.0 (14.8 to 19.6)        | -1.3 (-1.7 to -0.8)                            | -17.2 (-22.9 to -11.4)              |
| Senegal                                                                                                                                                                            | 18.2 (15.8 to 20.8)        | 16.6 (14.4 to 18.9)        | 16.3 (14.1 to 18.6)        | 14.9 (12.6 to 17.2)        | -0.7 (-1.1 to -0.4)                            | -10.2 (-14.9 to -5.9)               |
| Sierra Leone                                                                                                                                                                       | 29.8 (26.6 to 33.3)        | 24.4 (22.7 to 26.5)        | 23.8 (21.9 to 26.0)        | 20.0 (18.1 to 22.3)        | -1.3 (-1.7 to -0.9)                            | -17.9 (-22.9 to -12.7)              |
| Togo                                                                                                                                                                               | 12.5 (11.1 to 13.9)        | 10.9 (10.0 to 11.9)        | 10.6 (9.7 to 11.8)         | 9.4 (8.4 to 10.4)          | -1.0 (-1.4 to -0.7)                            | -14.2 (-18.8 to -9.6)               |
| <b>Indicator 5.2.2: Age-standardised prevalence of women aged 15 years and older who experienced physical or sexual violence by non-intimate partner in the last 12 months (%)</b> |                            |                            |                            |                            |                                                |                                     |
| <b>Central Europe, Eastern Europe, and Central Asia</b>                                                                                                                            |                            |                            |                            |                            |                                                |                                     |
| <b>Central Asia</b>                                                                                                                                                                |                            |                            |                            |                            |                                                |                                     |
| Armenia                                                                                                                                                                            | 0.1 (0.1 to 0.1)           | 0.1 (0.1 to 0.1)           | 0.1 (0.1 to 0.1)           | 0.1 (0.1 to 0.1)           | 0.6 (0.2 to 1.0)                               | 9.2 (2.8 to 16.1)                   |
| Azerbaijan                                                                                                                                                                         | 0.1 (0.1 to 0.1)           | 0.1 (0.1 to 0.1)           | 0.1 (0.1 to 0.1)           | 0.1 (0.1 to 0.1)           | 0.5 (0.1 to 1.0)                               | 8.1 (1.3 to 16.0)                   |
| Georgia                                                                                                                                                                            | 0.1 (0.1 to 0.1)           | 0.1 (0.1 to 0.1)           | 0.1 (0.1 to 0.1)           | 0.1 (0.1 to 0.1)           | 0.6 (0.0 to 1.2)                               | 9.5 (0.1 to 18.9)                   |
| Kazakhstan                                                                                                                                                                         | 0.2 (0.2 to 0.2)           | 0.2 (0.2 to 0.2)           | 0.2 (0.2 to 0.2)           | 0.2 (0.2 to 0.2)           | 0.5 (0.1 to 0.9)                               | 7.7 (0.8 to 14.9)                   |
| Kyrgyzstan                                                                                                                                                                         | 0.0 (0.0 to 0.0)           | 0.0 (0.0 to 0.0)           | 0.0 (0.0 to 0.0)           | 0.0 (0.0 to 0.1)           | 0.3 (-0.4 to 0.8)                              | 4.8 (-5.3 to 13.0)                  |
| Mongolia                                                                                                                                                                           | 0.1 (0.1 to 0.1)           | 0.1 (0.1 to 0.1)           | 0.1 (0.1 to 0.1)           | 0.1 (0.1 to 0.1)           | 0.5 (0.1 to 1.0)                               | 7.9 (1.6 to 16.3)                   |
| Tajikistan                                                                                                                                                                         | 0.0 (0.0 to 0.1)           | 0.0 (0.0 to 0.1)           | 0.0 (0.0 to 0.1)           | 0.0 (0.0 to 0.1)           | 0.4 (-0.1 to 0.9)                              | 6.9 (-1.1 to 14.8)                  |
| Turkmenistan                                                                                                                                                                       | 0.1 (0.1 to 0.1)           | 0.1 (0.1 to 0.1)           | 0.1 (0.1 to 0.1)           | 0.1 (0.1 to 0.1)           | 0.6 (0.2 to 1.1)                               | 9.5 (2.4 to 17.3)                   |
| Uzbekistan                                                                                                                                                                         | 0.1 (0.1 to 0.1)           | 0.1 (0.1 to 0.1)           | 0.1 (0.1 to 0.1)           | 0.1 (0.1 to 0.1)           | 0.7 (0.2 to 1.1)                               | 10.4 (2.8 to 17.4)                  |
| <b>Central Europe</b>                                                                                                                                                              |                            |                            |                            |                            |                                                |                                     |
| Albania                                                                                                                                                                            | 0.4 (0.3 to 0.5)           | 0.4 (0.3 to 0.6)           | 0.4 (0.3 to 0.6)           | 0.4 (0.3 to 0.6)           | 0.4 (-0.2 to 0.8)                              | 5.5 (-2.5 to 13.3)                  |
| Bosnia and Herzegovina                                                                                                                                                             | 0.6 (0.5 to 0.7)           | 0.7 (0.5 to 0.8)           | 0.7 (0.5 to 0.8)           | 0.7 (0.6 to 0.9)           | 0.7 (0.2 to 1.2)                               | 11.4 (3.8 to 19.1)                  |
| Bulgaria                                                                                                                                                                           | 1.1 (0.7 to 1.6)           | 1.3 (0.9 to 1.9)           | 1.3 (0.9 to 1.9)           | 1.4 (1.0 to 2.1)           | 0.7 (0.2 to 1.2)                               | 10.8 (2.8 to 20.3)                  |
| Croatia                                                                                                                                                                            | 0.5 (0.3 to 0.7)           | 0.5 (0.4 to 0.7)           | 0.5 (0.4 to 0.7)           | 0.6 (0.4 to 0.8)           | 0.7 (0.3 to 1.2)                               | 11.1 (3.9 to 19.8)                  |
| Czech Republic                                                                                                                                                                     | 1.9 (1.5 to 2.3)           | 1.8 (1.5 to 2.3)           | 1.9 (1.5 to 2.3)           | 1.9 (1.5 to 2.4)           | 0.3 (-0.2 to 0.7)                              | 4.0 (-2.4 to 11.4)                  |
| Hungary                                                                                                                                                                            | 0.9 (0.7 to 1.1)           | 0.9 (0.8 to 1.2)           | 0.9 (0.8 to 1.2)           | 1.0 (0.8 to 1.3)           | 0.5 (0.0 to 1.0)                               | 7.3 (0.1 to 15.9)                   |
| Macedonia                                                                                                                                                                          | 0.6 (0.5 to 0.8)           | 0.7 (0.6 to 0.9)           | 0.7 (0.6 to 0.9)           | 0.8 (0.6 to 0.9)           | 0.5 (0.2 to 0.9)                               | 8.5 (2.4 to 14.6)                   |
| Montenegro                                                                                                                                                                         | 0.7 (0.5 to 0.8)           | 0.7 (0.6 to 0.9)           | 0.7 (0.6 to 0.9)           | 0.8 (0.6 to 1.0)           | 0.5 (0.0 to 0.9)                               | 7.5 (0.4 to 14.7)                   |
| Poland                                                                                                                                                                             | 0.8 (0.7 to 1.1)           | 0.9 (0.7 to 1.1)           | 0.9 (0.7 to 1.1)           | 1.0 (0.8 to 1.2)           | 0.6 (0.1 to 1.1)                               | 9.4 (1.1 to 18.3)                   |
| Romania                                                                                                                                                                            | 0.3 (0.2 to 0.5)           | 0.4 (0.2 to 0.5)           | 0.4 (0.2 to 0.5)           | 0.4 (-0.2 to 0.8)          | 0.4 (-0.2 to 0.8)                              | 5.8 (-2.3 to 13.1)                  |
| Serbia                                                                                                                                                                             | 0.6 (0.5 to 0.8)           | 0.7 (0.6 to 0.8)           | 0.7 (0.6 to 0.9)           | 0.7 (0.6 to 0.9)           | 0.5 (0.1 to 1.0)                               | 8.2 (1.2 to 15.5)                   |
| Slovakia                                                                                                                                                                           | 1.1 (0.8 to 1.3)           | 1.1 (0.9 to 1.4)           | 1.1 (0.9 to 1.4)           | 1.2 (1.0 to 1.5)           | 0.5 (0.1 to 0.9)                               | 7.6 (0.8 to 14.5)                   |
| Slovenia                                                                                                                                                                           | 0.5 (0.4 to 0.7)           | 0.5 (0.4 to 0.7)           | 0.6 (0.4 to 0.7)           | 0.6 (0.5 to 0.8)           | 0.4 (-0.0 to 0.9)                              | 6.0 (-0.3 to 14.4)                  |
| <b>Eastern Europe</b>                                                                                                                                                              |                            |                            |                            |                            |                                                |                                     |
| Belarus                                                                                                                                                                            | 0.7 (0.6 to 0.9)           | 0.8 (0.7 to 1.0)           | 0.8 (0.7 to 1.0)           | 0.9 (0.7 to 1.1)           | 0.7 (0.3 to 1.1)                               | 10.8 (5.1 to 17.8)                  |
| Estonia                                                                                                                                                                            | 1.3 (1.0 to 1.6)           | 1.4 (1.1 to 1.7)           | 1.4 (1.1 to 1.8)           | 1.5 (1.2 to 1.9)           | 0.6 (0.2 to 1.1)                               | 9.7 (3.4 to 17.1)                   |
| Latvia                                                                                                                                                                             | 1.3 (1.0 to 1.6)           | 1.4 (1.1 to 1.7)           | 1.4 (1.1 to 1.7)           | 1.4 (1.1 to 1.7)           | 0.4 (0.0 to 0.7)                               | 5.8 (0.6 to 11.3)                   |
| Lithuania                                                                                                                                                                          | 0.4 (0.3 to 0.6)           | 0.5 (0.4 to 0.6)           | 0.5 (0.4 to 0.6)           | 0.5 (0.4 to 0.7)           | 0.5 (0.1 to 0.9)                               | 8.1 (1.5 to 14.9)                   |
| Moldova                                                                                                                                                                            | 0.6 (0.5 to 0.8)           | 0.6 (0.5 to 0.9)           | 0.7 (0.5 to 0.9)           | 0.7 (0.5 to 0.9)           | 0.6 (0.1 to 1.0)                               | 9.2 (1.8 to 16.4)                   |
| Russia                                                                                                                                                                             | 0.8 (0.7 to 1.0)           | 0.9 (0.7 to 1.1)           | 0.9 (0.7 to 1.1)           | 0.9 (0.8 to 1.2)           | 0.4 (0.4 to 0.5)                               | 6.5 (5.4 to 7.8)                    |
| Ukraine                                                                                                                                                                            | 0.8 (0.6 to 1.0)           | 0.8 (0.7 to 1.0)           | 0.8 (0.7 to 1.0)           | 0.9 (0.7 to 1.1)           | 0.4 (-0.0 to 0.7)                              | 5.8 (-0.2 to 11.8)                  |
| <b>High-income</b>                                                                                                                                                                 |                            |                            |                            |                            |                                                |                                     |
| Australia                                                                                                                                                                          | 3.1 (2.4 to 3.9)           | 3.2 (2.5 to 4.0)           | 3.2 (2.5 to 4.1)           | 3.3 (2.5 to 4.3)           | 0.3 (-0.2 to 0.7)                              | 4.4 (-2.2 to 11.7)                  |
| New Zealand                                                                                                                                                                        | 1.9 (1.4 to 2.4)           | 1.8 (1.4 to 2.3)           | 1.8 (1.4 to 2.3)           | 1.8 (1.4 to 2.3)           | -0.1 (-0.4 to 0.3)                             | -1.1 (-6.4 to 5.4)                  |
| <b>High-income Asia Pacific</b>                                                                                                                                                    |                            |                            |                            |                            |                                                |                                     |
| Brunei                                                                                                                                                                             | 1.2 (1.0 to 1.6)           | 1.3 (1.0 to 1.7)           | 1.3 (1.0 to 1.7)           | 1.4 (1.1 to 1.8)           | 0.4 (0.0 to 1.0)                               | 7.0 (0.3 to 16.7)                   |
| Japan                                                                                                                                                                              | 1.3 (1.1 to 1.7)           | 1.4 (1.1 to 1.7)           | 1.4 (1.1 to 1.7)           | 1.4 (1.1 to 1.8)           | 0.2 (0.1 to 0.3)                               | 3.6 (1.8 to 5.3)                    |
| South Korea                                                                                                                                                                        | 1.3 (1.0 to 1.6)           | 1.3 (1.1 to 1.7)           | 1.4 (1.1 to 1.7)           | 1.4 (1.1 to 1.9)           | 0.5 (0.1 to 0.8)                               | 7.5 (1.3 to 13.4)                   |
| Singapore                                                                                                                                                                          | 1.3 (1.0 to 1.6)           | 1.4 (1.1 to 1.7)           | 1.4 (1.1 to 1.7)           | 1.4 (1.1 to 1.9)           | 0.4 (0.0 to 0.9)                               | 6.6 (0.7 to 13.7)                   |
| <b>High-income North America</b>                                                                                                                                                   |                            |                            |                            |                            |                                                |                                     |
| Canada                                                                                                                                                                             | 1.1 (0.9 to 1.4)           | 1.2 (0.9 to 1.6)           | 1.2 (0.9 to 1.6)           | 1.3 (1.0 to 1.7)           | 0.5 (-0.1 to 1.0)                              | 7.4 (-0.8 to 15.9)                  |
| Greenland                                                                                                                                                                          | 1.4 (1.1 to 1.8)           | 1.5 (1.1 to 1.9)           | 1.5 (1.1 to 1.9)           | 1.6 (1.2 to 2.0)           | 0.4 (-0.0 to 0.7)                              | 5.6 (-0.3 to 11.0)                  |
| United States                                                                                                                                                                      | 2.2 (1.7 to 2.9)           | 2.3 (1.8 to 3.0)           | 2.3 (1.8 to 3.0)           | 2.4 (1.8 to 3.1)           | 0.2 (-0.1 to 0.4)                              | 2.6 (-1.4 to 6.7)                   |
| <b>Southern Latin America</b>                                                                                                                                                      |                            |                            |                            |                            |                                                |                                     |
| Argentina                                                                                                                                                                          | 0.4 (0.3 to 0.6)           | 0.4 (0.3 to 0.7)           | 0.4 (0.3 to 0.7)           | 0.5 (0.3 to 0.8)           | 0.6 (0.0 to 1.2)                               | 9.4 (0.5 to 19.8)                   |
| Chile                                                                                                                                                                              | 0.5 (0.4 to 0.6)           | 0.5 (0.4 to 0.7)           | 0.6 (0.4 to 0.7)           | 0.7 (0.5 to 0.8)           | 0.7 (0.3 to 1.1)                               | 11.3 (4.0 to 18.3)                  |
| Uruguay                                                                                                                                                                            | 0.7 (0.5 to 0.9)           | 0.7 (0.5 to 1.0)           | 0.7 (0.5 to 1.0)           | 0.8 (0.6 to 1.1)           | 0.8 (0.3 to 1.3)                               | 13.1 (4.4 to 21.8)                  |
| <b>Western Europe</b>                                                                                                                                                              |                            |                            |                            |                            |                                                |                                     |
| Andorra                                                                                                                                                                            | 1.4 (1.1 to 1.7)           | 1.4 (1.1 to 1.7)           | 1.4 (1.1 to 1.8)           | 1.4 (1.1 to 1.9)           | 0.2 (-0.3 to 0.6)                              | 2.4 (-4.2 to 8.9)                   |
| Austria                                                                                                                                                                            | 2.0 (1.6 to 2.4)           | 2.1 (1.6 to 2.6)           | 2.1 (1.6 to 2.6)           | 2.2 (1.7 to 2.8)           | 0.3 (-0.1 to 0.7)                              | 5.1 (-0.8 to 11.4)                  |
| Belgium                                                                                                                                                                            | 1.2 (0.9 to 1.5)           | 1.2 (1.0 to 1.5)           | 1.2 (1.0 to 1.5)           | 1.3 (1.0 to 1.6)           | 0.4 (-0.0 to 0.8)                              | 5.9 (-0.5 to 12.9)                  |
| Cyprus                                                                                                                                                                             | 0.7 (0.5 to 0.8)           | 0.7 (0.6 to 0.9)           | 0.7 (0.6 to 0.9)           | 0.8 (0.6 to 0.9)           | 0.3 (-0.1 to 0.8)                              | 5.4 (-1.1 to 12.8)                  |
| Denmark                                                                                                                                                                            | 1.1 (0.9 to 1.4)           | 1.1 (0.9 to 1.4)           | 1.1 (0.9 to 1.4)           | 1.2 (0.9 to 1.5)           | 0.2 (-0.2 to 0.6)                              | 3.1 (-2.4 to 9.1)                   |
| Finland                                                                                                                                                                            | 2.0 (1.6 to 2.5)           | 2.1 (1.7 to 2.5)           | 2.1 (1.7 to 2.6)           | 2.2 (1.8 to 2.7)           | 0.4 (-0.1 to 0.9)                              | 5.7 (-1.2 to 13.7)                  |
| France                                                                                                                                                                             | 1.5 (1.2 to 1.9)           | 1.6 (1.2 to 1.9)           | 1.6 (1.3 to 1.9)           | 1.6 (1.3 to 2.1)           | 0.4 (-0.1 to 0.8)                              | 5.5 (-0.8 to 12.8)                  |
| Germany                                                                                                                                                                            | 1.1 (0.8 to 1.6)           | 1.0 (0.7 to 1.5)           | 1.0 (0.7 to 1.5)           | 1.1 (0.7 to 1.5)           | 0.1 (-0.6 to 0.7)                              | 1.5 (-7.9 to 10.8)                  |
| Greece                                                                                                                                                                             | 1.1 (0.9 to 1.4)           | 1.1 (0.9 to 1.4)           | 1.1 (0.9 to 1.4)           | 1.1 (0.9 to 1.4)           | 0.2 (-0.1 to 0.6)                              | 3.0 (-2.0 to 8.9)                   |
| Iceland                                                                                                                                                                            | 1.3 (1.1 to 1.7)           | 1.4 (1.1 to 1.8)           | 1.4 (1.1 to 1.8)           | 1.5 (1.2 to 1.9)           | 0.3 (-0.0 to 0.8)                              | 5.3 (-0.7 to 13.1)                  |
| Ireland                                                                                                                                                                            | 0.8 (0.7 to 1.1)           | 0.9 (0.7 to 1.1)           | 0.9 (0.7 to 1.1)           | 0.9 (0.8 to 1.2)           | 0.6 (0.1 to 1.0)                               | 8.9 (1.8 to 16.9)                   |
| Israel                                                                                                                                                                             | 1.2 (1.0 to 1.6)           | 1.3 (1.0 to 1.6)           | 1.3 (1.0 to 1.6)           | 1.3 (1.0 to 1.6)           | 0.2 (-0.2 to 0.6)                              | 3.8 (-2.5 to 10.0)                  |
| Italy                                                                                                                                                                              | 3.5 (2.8 to 4.4)           | 3.5 (2.8 to 4.3)           | 3.5 (2.8 to 4.4)           | 3.5 (2.8 to 4.5)           | 0.1 (-0.3 to 0.6)                              | 1.7 (-4.6 to 8.9)                   |
| Luxembourg                                                                                                                                                                         | 1.7 (1.3 to 2.1)           | 1.7 (1.4 to 2.1)           | 1.7 (1.4 to 2.1)           | 1.8 (1.4 to 2.2)           | 0.2 (-0.2 to 0.6)                              | 3.5 (-2.6 to 9.7)                   |
| Malta                                                                                                                                                                              | 1.2 (0.9 to 1.6)           | 1.3 (1.0 to 1.6)           | 1.3 (1.0 to 1.6)           | 1.4 (1.0 to 1.8)           | 0.5 (-0.0 to 1.0)                              | 7.9 (0.4 to 15.0)                   |
| Netherlands                                                                                                                                                                        | 2.1 (1.7 to 2.6)           | 2.2 (1.8 to 2.7)           | 2.2 (1.8 to 2.8)           | 2.4 (1.9 to 3.0)           | 0.4 (-0.1 to 0.9)                              | 6.1 (-1.4 to 14.1)                  |
| Norway                                                                                                                                                                             | 1.4 (1.1 to 1.7)           | 1.4 (1.2 to 1.8)           | 1.4 (1.2 to 1.8)           | 1.5 (1.2 to 1.9)           | 0.3 (0.2 to 0.5)                               | 5.2 (3.4 to 7.2)                    |
| Portugal                                                                                                                                                                           | 0.7 (0.5 to 0.9)           | 0.7 (0.6 to 1.0)           | 0.8 (0.6 to 1.0)           | 0.9 (0.7 to 1.1)           | 1.1 (0.5 to 1.5)                               | 17.4 (7.4 to 25.8)                  |
| Spain                                                                                                                                                                              | 1.0 (0.8 to 1.3)           | 1.1 (0.9 to 1.4)           | 1.1 (0.8 to 1.4)           | 1.1 (0.9 to 1.5)           | 0.4 (-0.1 to 0.8)                              | 5.6 (-0.9 to 12.8)                  |
| Sweden                                                                                                                                                                             | 1.9 (1.5 to 2.3)           | 1.8 (1.5 to 2.2)           | 1.8 (1.4 to 2.2)           | 1.8 (1.4 to 2.2)           | -0.1 (-0.4 to 0.2)                             | -1.3 (-6.0 to 3.7)                  |
| Switzerland                                                                                                                                                                        | 1.1 (0.9 to 1.3)           | 1.1 (0.9 to 1.4)           | 1.1 (0.9 to 1.4)           | 1.2 (0.9 to 1.5)           | 0.2 (-0.2 to 0.7)                              | 3.7 (-2.6 to 10.7)                  |
| United Kingdom                                                                                                                                                                     | 1.1 (0.8 to 1.3)           | 1.1 (0.8 to 1.3)           | 1.1 (0.8 to 1.3)           | 1.1 (0.8 to 1.3)           | 0.0 (-0.1 to 0.1)                              | 0.1 (-1.3 to 1.5)                   |
| <b>Latin America and Caribbean</b>                                                                                                                                                 |                            |                            |                            |                            |                                                |                                     |

|                                               | Estimate in 2000 (95% UIs) | Estimate in 2015 (95% UIs) | Estimate in 2017 (95% UIs) | Estimate in 2020 (95% UIs) | Annualised rate of change, 2015-2020 (95% UIs) | Percent change, 2015-2020 (95% UIs) |
|-----------------------------------------------|----------------------------|----------------------------|----------------------------|----------------------------|------------------------------------------------|-------------------------------------|
| <b>Andean Latin America</b>                   |                            |                            |                            |                            |                                                |                                     |
| Bolivia                                       | 0.9 (0.7 to 1.1)           | 0.9 (0.7 to 1.2)           | 1.0 (0.7 to 1.2)           | 1.1 (0.8 to 1.4)           | 0.9 (0.3 to 1.4)                               | 14.2 (4.4 to 24.2)                  |
| Ecuador                                       | 0.6 (0.5 to 0.8)           | 0.7 (0.5 to 0.9)           | 0.7 (0.6 to 0.9)           | 0.8 (0.6 to 1.0)           | 0.7 (0.2 to 1.1)                               | 10.6 (2.8 to 18.2)                  |
| Peru                                          | 0.5 (0.4 to 0.7)           | 0.6 (0.4 to 0.8)           | 0.6 (0.4 to 0.8)           | 0.6 (-0.0 to 1.2)          | 0.6 (-0.0 to 1.2)                              | 9.4 (-0.5 to 20.4)                  |
| <b>Caribbean</b>                              |                            |                            |                            |                            |                                                |                                     |
| Antigua and Barbuda                           | 1.8 (1.4 to 2.4)           | 2.0 (1.5 to 2.5)           | 2.0 (1.5 to 2.5)           | 2.1 (1.6 to 2.7)           | 0.4 (-0.0 to 0.9)                              | 5.8 (-0.5 to 14.4)                  |
| The Bahamas                                   | 1.9 (1.5 to 2.5)           | 2.1 (1.6 to 2.7)           | 2.1 (1.6 to 2.7)           | 2.2 (1.7 to 2.8)           | 0.3 (-0.2 to 0.7)                              | 4.1 (-2.7 to 10.3)                  |
| Barbados                                      | 1.9 (1.5 to 2.4)           | 2.0 (1.6 to 2.6)           | 2.0 (1.6 to 2.6)           | 2.1 (1.6 to 2.7)           | 0.3 (-0.1 to 0.7)                              | 5.4 (-1.9 to 11.1)                  |
| Belize                                        | 0.5 (0.4 to 0.7)           | 0.6 (0.4 to 0.8)           | 0.6 (0.4 to 0.8)           | 0.6 (0.5 to 0.9)           | 0.7 (0.1 to 1.2)                               | 10.7 (1.5 to 19.8)                  |
| Bermuda                                       | 2.0 (1.6 to 2.6)           | 2.2 (1.7 to 2.8)           | 2.2 (1.7 to 2.9)           | 2.3 (1.8 to 3.0)           | 0.3 (-0.2 to 0.8)                              | 4.9 (-2.3 to 13.3)                  |
| Cuba                                          | 1.7 (1.3 to 2.2)           | 1.9 (1.5 to 2.4)           | 1.9 (1.5 to 2.5)           | 2.0 (1.5 to 2.6)           | 0.5 (0.1 to 0.9)                               | 7.8 (2.0 to 13.8)                   |
| Dominica                                      | 1.7 (1.3 to 2.2)           | 1.9 (1.5 to 2.4)           | 1.9 (1.5 to 2.4)           | 2.0 (1.6 to 2.6)           | 0.5 (0.1 to 0.9)                               | 8.0 (2.2 to 14.4)                   |
| Dominican Republic                            | 0.5 (0.4 to 0.7)           | 0.6 (0.5 to 0.7)           | 0.6 (0.5 to 0.7)           | 0.6 (0.5 to 0.8)           | 0.5 (0.0 to 1.0)                               | 8.2 (0.2 to 15.9)                   |
| Grenada                                       | 1.7 (1.3 to 2.1)           | 1.8 (1.4 to 2.3)           | 1.8 (1.4 to 2.3)           | 1.9 (1.5 to 2.5)           | 0.5 (0.1 to 1.1)                               | 8.3 (1.0 to 17.1)                   |
| Guyana                                        | 1.5 (1.2 to 2.0)           | 1.7 (1.3 to 2.1)           | 1.7 (1.3 to 2.2)           | 1.8 (1.4 to 2.4)           | 0.6 (0.2 to 1.0)                               | 9.0 (2.3 to 16.0)                   |
| Haiti                                         | 6.3 (4.9 to 8.2)           | 7.0 (5.7 to 8.4)           | 7.0 (5.8 to 8.5)           | 7.6 (6.2 to 9.3)           | 0.6 (-0.0 to 1.2)                              | 9.5 (-0.1 to 19.2)                  |
| Jamaica                                       | 2.1 (1.6 to 2.7)           | 2.3 (1.8 to 2.9)           | 2.3 (1.8 to 3.0)           | 2.3 (1.9 to 3.2)           | 0.6 (0.1 to 0.9)                               | 9.0 (1.9 to 15.1)                   |
| Puerto Rico                                   | 2.9 (2.3 to 3.8)           | 3.1 (2.4 to 3.9)           | 3.1 (2.4 to 4.0)           | 3.3 (2.5 to 4.3)           | 0.5 (0.0 to 1.1)                               | 7.7 (0.1 to 17.5)                   |
| Saint Lucia                                   | 1.7 (1.3 to 2.2)           | 1.8 (1.4 to 2.4)           | 1.8 (1.4 to 2.4)           | 1.8 (1.5 to 2.5)           | 0.5 (0.0 to 1.0)                               | 7.7 (0.7 to 15.7)                   |
| Saint Vincent and the Grenadines              | 1.6 (1.2 to 2.0)           | 1.7 (1.3 to 2.2)           | 1.7 (1.3 to 2.2)           | 1.9 (1.4 to 2.5)           | 0.5 (0.1 to 0.9)                               | 8.3 (1.2 to 15.2)                   |
| Suriname                                      | 1.6 (1.3 to 2.1)           | 1.8 (1.4 to 2.3)           | 1.8 (1.4 to 2.3)           | 1.9 (1.5 to 2.5)           | 0.4 (-0.0 to 0.9)                              | 6.8 (-0.2 to 13.9)                  |
| Trinidad and Tobago                           | 1.8 (1.4 to 2.3)           | 1.9 (1.5 to 2.5)           | 1.9 (1.5 to 2.5)           | 2.0 (1.6 to 2.6)           | 0.3 (-0.1 to 0.7)                              | 4.4 (-1.8 to 11.7)                  |
| Virgin Islands, U.S.                          | 2.2 (1.7 to 2.9)           | 2.5 (1.9 to 3.1)           | 2.5 (1.9 to 3.1)           | 2.5 (2.0 to 3.3)           | 0.3 (-0.2 to 0.8)                              | 3.9 (-3.5 to 12.9)                  |
| <b>Central Latin America</b>                  |                            |                            |                            |                            |                                                |                                     |
| Colombia                                      | 0.6 (0.5 to 0.8)           | 0.6 (0.5 to 0.8)           | 0.7 (0.5 to 0.8)           | 0.7 (0.5 to 0.9)           | 0.8 (-0.1 to 1.4)                              | 12.2 (-1.2 to 23.5)                 |
| Costa Rica                                    | 4.8 (3.8 to 6.0)           | 5.2 (4.1 to 6.7)           | 5.3 (4.1 to 6.8)           | 5.7 (4.4 to 7.4)           | 0.6 (0.1 to 0.9)                               | 9.2 (2.2 to 15.2)                   |
| El Salvador                                   | 1.2 (0.9 to 1.5)           | 1.3 (1.0 to 1.7)           | 1.3 (1.1 to 1.7)           | 1.3 (1.1 to 1.9)           | 0.8 (0.2 to 1.4)                               | 12.1 (2.9 to 22.6)                  |
| Guatemala                                     | 0.5 (0.4 to 0.7)           | 0.6 (0.5 to 0.8)           | 0.6 (0.5 to 0.8)           | 0.6 (0.5 to 0.8)           | 0.5 (0.0 to 1.1)                               | 8.5 (0.7 to 18.0)                   |
| Honduras                                      | 0.9 (0.7 to 1.1)           | 0.9 (0.7 to 1.2)           | 0.9 (0.8 to 1.2)           | 1.0 (0.8 to 1.3)           | 0.7 (-0.0 to 1.3)                              | 10.6 (-0.4 to 21.8)                 |
| Mexico                                        | 0.8 (0.7 to 1.1)           | 0.8 (0.7 to 1.1)           | 0.8 (0.7 to 1.1)           | 0.8 (0.7 to 1.1)           | 0.1 (-0.0 to 0.3)                              | 1.5 (-0.4 to 4.0)                   |
| Nicaragua                                     | 0.9 (0.7 to 1.2)           | 1.0 (0.8 to 1.3)           | 1.0 (0.8 to 1.3)           | 1.1 (0.9 to 1.5)           | 0.7 (0.3 to 1.2)                               | 10.8 (4.8 to 19.0)                  |
| Panama                                        | 1.1 (0.9 to 1.4)           | 1.2 (0.9 to 1.5)           | 1.2 (1.0 to 1.6)           | 1.3 (1.0 to 1.8)           | 0.7 (0.2 to 1.1)                               | 10.8 (3.1 to 18.2)                  |
| Venezuela                                     | 1.1 (0.9 to 1.4)           | 1.2 (0.9 to 1.5)           | 1.2 (0.9 to 1.5)           | 1.3 (1.0 to 1.6)           | 0.4 (-0.1 to 1.0)                              | 6.8 (-1.1 to 15.7)                  |
| <b>Tropical Latin America</b>                 |                            |                            |                            |                            |                                                |                                     |
| Brazil                                        | 0.4 (0.3 to 0.5)           | 0.4 (0.3 to 0.5)           | 0.4 (0.3 to 0.6)           | 0.5 (0.4 to 0.6)           | 1.0 (0.8 to 1.1)                               | 15.6 (12.9 to 18.2)                 |
| Paraguay                                      | 0.7 (0.5 to 0.8)           | 0.7 (0.6 to 0.9)           | 0.7 (0.6 to 0.9)           | 0.8 (0.6 to 1.1)           | 0.6 (0.1 to 1.1)                               | 9.4 (1.0 to 17.1)                   |
| <b>North Africa and Middle East</b>           |                            |                            |                            |                            |                                                |                                     |
| <b>North Africa and Middle East</b>           |                            |                            |                            |                            |                                                |                                     |
| Afghanistan                                   | 0.2 (0.2 to 0.3)           | 0.3 (0.2 to 0.4)           | 0.3 (0.2 to 0.4)           | 0.3 (0.2 to 0.4)           | 0.9 (0.5 to 1.3)                               | 13.9 (7.1 to 21.4)                  |
| Algeria                                       | 0.4 (0.3 to 0.5)           | 0.5 (0.3 to 0.6)           | 0.5 (0.3 to 0.6)           | 0.5 (0.4 to 0.7)           | 0.8 (0.3 to 1.2)                               | 12.3 (4.4 to 20.0)                  |
| Bahrain                                       | 0.4 (0.3 to 0.6)           | 0.5 (0.4 to 0.6)           | 0.5 (0.4 to 0.6)           | 0.5 (0.4 to 0.6)           | 0.4 (-0.1 to 0.8)                              | 5.7 (-1.6 to 13.4)                  |
| Egypt                                         | 0.4 (0.3 to 0.5)           | 0.4 (0.3 to 0.5)           | 0.4 (0.3 to 0.5)           | 0.4 (0.3 to 0.6)           | 0.7 (0.3 to 1.2)                               | 10.9 (4.1 to 19.8)                  |
| Iran                                          | 0.4 (0.3 to 0.5)           | 0.5 (0.4 to 0.6)           | 0.5 (0.4 to 0.6)           | 0.5 (0.4 to 0.7)           | 0.7 (0.5 to 0.8)                               | 10.3 (8.3 to 12.4)                  |
| Iraq                                          | 0.3 (0.3 to 0.5)           | 0.4 (0.3 to 0.5)           | 0.4 (0.3 to 0.5)           | 0.4 (0.3 to 0.6)           | 0.8 (0.3 to 1.3)                               | 12.2 (4.7 to 21.8)                  |
| Jordan                                        | 0.4 (0.3 to 0.5)           | 0.5 (0.3 to 0.6)           | 0.5 (0.3 to 0.6)           | 0.5 (0.4 to 0.7)           | 0.7 (0.2 to 1.1)                               | 11.6 (3.2 to 18.6)                  |
| Kuwait                                        | 0.4 (0.3 to 0.6)           | 0.5 (0.4 to 0.6)           | 0.5 (0.4 to 0.7)           | 0.6 (0.4 to 0.7)           | 0.8 (0.3 to 1.2)                               | 12.0 (4.5 to 19.8)                  |
| Lebanon                                       | 0.4 (0.3 to 0.5)           | 0.5 (0.4 to 0.6)           | 0.5 (0.4 to 0.6)           | 0.5 (0.4 to 0.7)           | 0.8 (0.3 to 1.3)                               | 13.2 (5.2 to 22.1)                  |
| Libya                                         | 0.5 (0.4 to 0.6)           | 0.5 (0.4 to 0.6)           | 0.5 (0.4 to 0.6)           | 0.5 (0.4 to 0.7)           | 0.1 (-0.4 to 0.5)                              | 1.2 (-5.6 to 8.4)                   |
| Morocco                                       | 0.3 (0.3 to 0.5)           | 0.4 (0.3 to 0.5)           | 0.4 (0.3 to 0.5)           | 0.4 (0.3 to 0.6)           | 0.8 (0.4 to 1.3)                               | 13.0 (5.7 to 21.3)                  |
| Palestine                                     | 0.3 (0.2 to 0.4)           | 0.4 (0.3 to 0.5)           | 0.4 (0.3 to 0.5)           | 0.4 (0.3 to 0.5)           | 0.9 (0.5 to 1.3)                               | 14.0 (7.5 to 21.6)                  |
| Oman                                          | 0.4 (0.3 to 0.5)           | 0.5 (0.4 to 0.6)           | 0.5 (0.4 to 0.6)           | 0.6 (0.4 to 0.7)           | 1.0 (0.5 to 1.5)                               | 16.6 (8.1 to 25.3)                  |
| Qatar                                         | 0.5 (0.3 to 0.6)           | 0.5 (0.4 to 0.6)           | 0.5 (0.4 to 0.6)           | 0.5 (0.4 to 0.7)           | 0.6 (0.1 to 1.0)                               | 8.8 (2.2 to 16.5)                   |
| Saudi Arabia                                  | 0.4 (0.3 to 0.5)           | 0.5 (0.4 to 0.6)           | 0.5 (0.4 to 0.7)           | 0.6 (0.5 to 0.8)           | 1.3 (0.8 to 1.7)                               | 21.0 (12.5 to 29.6)                 |
| Sudan                                         | 0.3 (0.2 to 0.4)           | 0.3 (0.3 to 0.5)           | 0.3 (0.3 to 0.5)           | 0.4 (0.3 to 0.5)           | 1.2 (0.8 to 1.6)                               | 19.6 (12.0 to 27.6)                 |
| Syria                                         | 0.3 (0.3 to 0.5)           | 0.4 (0.3 to 0.5)           | 0.4 (0.3 to 0.5)           | 0.5 (0.3 to 0.6)           | 0.9 (0.3 to 1.3)                               | 14.5 (5.2 to 21.8)                  |
| Tunisia                                       | 0.4 (0.3 to 0.5)           | 0.4 (0.3 to 0.6)           | 0.4 (0.3 to 0.6)           | 0.5 (0.4 to 0.6)           | 0.8 (0.4 to 1.3)                               | 12.8 (6.2 to 21.7)                  |
| Turkey                                        | 0.4 (0.3 to 0.5)           | 0.5 (0.4 to 0.6)           | 0.5 (0.4 to 0.6)           | 0.5 (0.4 to 0.7)           | 0.8 (0.3 to 1.3)                               | 12.6 (4.8 to 20.8)                  |
| United Arab Emirates                          | 0.5 (0.4 to 0.6)           | 0.5 (0.4 to 0.7)           | 0.5 (0.4 to 0.7)           | 0.5 (0.4 to 0.7)           | 0.4 (-0.0 to 0.9)                              | 6.6 (-0.7 to 14.8)                  |
| Yemen                                         | 0.3 (0.2 to 0.4)           | 0.3 (0.3 to 0.4)           | 0.3 (0.3 to 0.4)           | 0.4 (0.3 to 0.5)           | 0.9 (0.4 to 1.4)                               | 14.4 (6.8 to 23.5)                  |
| <b>South Asia</b>                             |                            |                            |                            |                            |                                                |                                     |
| <b>South Asia</b>                             |                            |                            |                            |                            |                                                |                                     |
| Bangladesh                                    | 0.1 (0.1 to 0.2)           | 0.1 (0.1 to 0.2)           | 0.1 (0.1 to 0.2)           | 0.2 (0.1 to 0.2)           | 0.9 (0.2 to 1.4)                               | 14.2 (2.5 to 24.3)                  |
| Bhutan                                        | 0.1 (0.1 to 0.2)           | 0.2 (0.1 to 0.2)           | 0.2 (0.1 to 0.2)           | 0.2 (0.1 to 0.2)           | 1.0 (0.3 to 1.6)                               | 15.5 (5.3 to 27.1)                  |
| India                                         | 0.1 (0.1 to 0.2)           | 0.1 (0.1 to 0.2)           | 0.1 (0.1 to 0.2)           | 0.1 (0.1 to 0.2)           | 0.1 (-0.3 to 0.4)                              | 1.0 (-3.8 to 6.1)                   |
| Nepal                                         | 0.1 (0.1 to 0.1)           | 0.1 (0.1 to 0.2)           | 0.1 (0.1 to 0.2)           | 0.1 (0.1 to 0.2)           | 0.9 (0.4 to 1.5)                               | 15.3 (6.0 to 24.8)                  |
| Pakistan                                      | 0.1 (0.1 to 0.2)           | 0.1 (0.1 to 0.2)           | 0.1 (0.1 to 0.2)           | 0.2 (0.1 to 0.2)           | 0.8 (0.3 to 1.4)                               | 13.4 (3.9 to 23.8)                  |
| <b>Southeast Asia, East Asia, and Oceania</b> |                            |                            |                            |                            |                                                |                                     |
| <b>East Asia</b>                              |                            |                            |                            |                            |                                                |                                     |
| China                                         | 1.3 (1.0 to 1.7)           | 1.5 (1.2 to 1.9)           | 1.5 (1.2 to 1.9)           | 1.7 (1.3 to 2.1)           | 0.7 (0.6 to 0.8)                               | 11.3 (9.6 to 13.1)                  |
| North Korea                                   | 1.2 (0.9 to 1.5)           | 1.2 (0.9 to 1.6)           | 1.2 (0.9 to 1.6)           | 1.2 (0.9 to 1.6)           | 0.2 (-0.2 to 0.6)                              | 2.8 (-3.1 to 10.1)                  |
| Taiwan (Province of China)                    | 1.6 (1.2 to 2.1)           | 1.8 (1.4 to 2.3)           | 1.8 (1.4 to 2.3)           | 1.9 (1.5 to 2.5)           | 0.5 (0.1 to 1.0)                               | 8.6 (1.6 to 16.9)                   |
| <b>Oceania</b>                                |                            |                            |                            |                            |                                                |                                     |
| American Samoa                                | 0.9 (0.7 to 1.2)           | 1.0 (0.8 to 1.3)           | 1.0 (0.8 to 1.3)           | 1.1 (0.8 to 1.4)           | 0.5 (0.0 to 0.9)                               | 7.5 (0.4 to 14.6)                   |
| Federated States of Micronesia                | 0.8 (0.6 to 1.0)           | 0.9 (0.7 to 1.1)           | 0.9 (0.7 to 1.1)           | 0.9 (0.7 to 1.1)           | 0.5 (-0.0 to 1.0)                              | 7.8 (-0.1 to 15.7)                  |
| Fiji                                          | 0.9 (0.7 to 1.1)           | 0.9 (0.7 to 1.2)           | 0.9 (0.7 to 1.2)           | 1.0 (0.8 to 1.3)           | 0.5 (0.0 to 0.9)                               | 8.0 (0.1 to 14.9)                   |
| Guam                                          | 1.1 (0.8 to 1.4)           | 1.1 (0.9 to 1.4)           | 1.1 (0.9 to 1.5)           | 1.2 (0.9 to 1.6)           | 0.5 (-0.0 to 0.9)                              | 7.4 (-0.7 to 14.6)                  |
| Kiribati                                      | 0.7 (0.5 to 0.9)           | 0.7 (0.6 to 0.9)           | 0.7 (0.6 to 0.9)           | 0.8 (0.6 to 1.0)           | 0.5 (-0.0 to 0.9)                              | 7.5 (-0.2 to 14.5)                  |
| Marshall Islands                              | 0.8 (0.6 to 1.0)           | 0.8 (0.7 to 1.1)           | 0.8 (0.7 to 1.1)           | 0.9 (0.7 to 1.2)           | 0.7 (0.1 to 1.1)                               | 11.1 (2.1 to 18.1)                  |
| Northern Mariana Islands                      | 1.1 (0.8 to 1.4)           | 1.1 (0.8 to 1.4)           | 1.1 (0.8 to 1.4)           | 1.1 (0.8 to 1.4)           | 0.1 (-0.3 to 0.6)                              | 1.6 (-4.7 to 8.7)                   |
| Papua New Guinea                              | 0.7 (0.5 to 0.9)           | 0.7 (0.6 to 0.9)           | 0.7 (0.6 to 0.9)           | 0.8 (0.6 to 1.0)           | 0.6 (0.1 to 1.1)                               | 9.0 (1.9 to 18.4)                   |

|                                                                                                                                                                                | Estimate in 2000 (95% UIs) | Estimate in 2015 (95% UIs) | Estimate in 2017 (95% UIs) | Estimate in 2020 (95% UIs) | Annualised rate of change, 2015-2020 (95% UIs) | Percent change, 2015-2020 (95% UIs) |
|--------------------------------------------------------------------------------------------------------------------------------------------------------------------------------|----------------------------|----------------------------|----------------------------|----------------------------|------------------------------------------------|-------------------------------------|
| Samoa                                                                                                                                                                          | 0.8 (0.6 to 1.1)           | 0.9 (0.7 to 1.1)           | 0.9 (0.7 to 1.1)           | 0.9 (0.7 to 1.2)           | 0.3 (-0.2 to 0.8)                              | 4.8 (-4.1 to 13.0)                  |
| Solomon Islands                                                                                                                                                                | 0.7 (0.5 to 0.9)           | 0.7 (0.6 to 0.9)           | 0.7 (0.6 to 0.9)           | 0.8 (0.6 to 1.0)           | 0.6 (0.2 to 1.1)                               | 9.1 (2.4 to 17.4)                   |
| Tonga                                                                                                                                                                          | 0.9 (0.7 to 1.1)           | 0.9 (0.7 to 1.2)           | 0.9 (0.7 to 1.2)           | 1.0 (0.8 to 1.3)           | 0.5 (0.1 to 0.9)                               | 8.4 (1.2 to 15.0)                   |
| Vanuatu                                                                                                                                                                        | 0.7 (0.6 to 0.9)           | 0.8 (0.6 to 1.0)           | 0.8 (0.6 to 1.0)           | 0.8 (0.6 to 1.0)           | 0.5 (0.0 to 1.0)                               | 7.5 (0.3 to 15.5)                   |
| <b>Southeast Asia</b>                                                                                                                                                          |                            |                            |                            |                            |                                                |                                     |
| Cambodia                                                                                                                                                                       | 0.7 (0.5 to 0.9)           | 0.8 (0.7 to 1.1)           | 0.8 (0.7 to 1.1)           | 1.0 (0.8 to 1.3)           | 1.0 (0.4 to 1.6)                               | 16.8 (6.5 to 26.9)                  |
| Indonesia                                                                                                                                                                      | 2.0 (1.6 to 2.6)           | 2.2 (1.7 to 2.8)           | 2.3 (1.8 to 2.9)           | 2.5 (1.9 to 3.1)           | 0.7 (0.5 to 0.8)                               | 10.3 (8.4 to 12.5)                  |
| Laos                                                                                                                                                                           | 0.5 (0.4 to 0.6)           | 0.6 (0.4 to 0.7)           | 0.6 (0.4 to 0.7)           | 0.7 (0.5 to 0.8)           | 1.1 (0.7 to 1.6)                               | 17.9 (11.0 to 26.4)                 |
| Malaysia                                                                                                                                                                       | 0.7 (0.5 to 0.9)           | 0.7 (0.6 to 0.9)           | 0.8 (0.6 to 1.0)           | 0.8 (0.6 to 1.1)           | 0.8 (0.3 to 1.3)                               | 13.2 (5.1 to 21.9)                  |
| Maldives                                                                                                                                                                       | 0.6 (0.4 to 0.7)           | 0.7 (0.5 to 0.8)           | 0.7 (0.5 to 0.8)           | 0.8 (0.6 to 1.0)           | 1.1 (0.7 to 1.5)                               | 17.6 (10.3 to 25.0)                 |
| Mauritius                                                                                                                                                                      | 0.6 (0.5 to 0.8)           | 0.7 (0.6 to 0.9)           | 0.7 (0.6 to 0.9)           | 0.8 (0.6 to 1.0)           | 0.8 (0.3 to 1.2)                               | 12.5 (4.8 to 20.5)                  |
| Myanmar                                                                                                                                                                        | 0.1 (0.1 to 0.2)           | 0.1 (0.1 to 0.2)           | 0.2 (0.1 to 0.2)           | 0.2 (0.1 to 0.2)           | 1.1 (0.5 to 1.7)                               | 17.5 (8.6 to 28.3)                  |
| Philippines                                                                                                                                                                    | 0.8 (0.6 to 1.0)           | 0.8 (0.6 to 1.0)           | 0.8 (0.6 to 1.1)           | 0.8 (0.6 to 1.1)           | 0.3 (-0.5 to 0.8)                              | 4.1 (-6.8 to 13.0)                  |
| Sri Lanka                                                                                                                                                                      | 0.3 (0.2 to 0.5)           | 0.4 (0.3 to 0.6)           | 0.4 (0.3 to 0.6)           | 0.5 (0.3 to 0.7)           | 1.1 (0.5 to 1.7)                               | 18.8 (7.3 to 29.1)                  |
| Seychelles                                                                                                                                                                     | 0.6 (0.5 to 0.8)           | 0.7 (0.5 to 0.9)           | 0.7 (0.5 to 0.9)           | 0.8 (0.6 to 1.0)           | 0.6 (0.2 to 1.1)                               | 10.0 (2.4 to 18.1)                  |
| Thailand                                                                                                                                                                       | 0.6 (0.5 to 0.8)           | 0.7 (0.5 to 0.9)           | 0.7 (0.5 to 0.9)           | 0.8 (0.6 to 1.0)           | 0.8 (0.4 to 1.2)                               | 13.2 (6.1 to 19.1)                  |
| Timor-Leste                                                                                                                                                                    | 0.5 (0.3 to 0.6)           | 0.6 (0.4 to 0.7)           | 0.6 (0.4 to 0.7)           | 0.7 (0.5 to 0.8)           | 1.1 (0.6 to 1.5)                               | 18.1 (9.3 to 25.0)                  |
| Vietnam                                                                                                                                                                        | 0.5 (0.4 to 0.7)           | 0.6 (0.5 to 0.8)           | 0.6 (0.5 to 0.8)           | 0.7 (0.5 to 0.9)           | 1.0 (0.5 to 1.5)                               | 15.9 (7.8 to 24.8)                  |
| <b>Sub-Saharan Africa</b>                                                                                                                                                      |                            |                            |                            |                            |                                                |                                     |
| <b>Central Sub-Saharan Africa</b>                                                                                                                                              |                            |                            |                            |                            |                                                |                                     |
| Angola                                                                                                                                                                         | 1.0 (0.8 to 1.2)           | 1.2 (0.9 to 1.5)           | 1.2 (0.9 to 1.5)           | 1.4 (1.1 to 1.8)           | 1.2 (0.8 to 1.7)                               | 20.0 (12.4 to 29.9)                 |
| Central African Republic                                                                                                                                                       | 0.9 (0.7 to 1.2)           | 1.0 (0.8 to 1.3)           | 1.0 (0.8 to 1.3)           | 1.1 (0.8 to 1.5)           | 0.5 (0.1 to 1.0)                               | 8.3 (1.6 to 15.6)                   |
| Congo                                                                                                                                                                          | 1.2 (0.9 to 1.5)           | 1.4 (1.0 to 1.7)           | 1.4 (1.1 to 1.8)           | 1.6 (1.2 to 2.0)           | 0.9 (0.4 to 1.3)                               | 14.9 (7.0 to 22.4)                  |
| Democratic Republic of the Congo                                                                                                                                               | 0.8 (0.6 to 1.1)           | 0.9 (0.7 to 1.2)           | 0.9 (0.7 to 1.2)           | 1.0 (0.7 to 1.3)           | 0.8 (0.3 to 1.2)                               | 13.0 (3.8 to 20.1)                  |
| Equatorial Guinea                                                                                                                                                              | 1.1 (0.8 to 1.4)           | 1.4 (1.1 to 1.8)           | 1.5 (1.1 to 1.9)           | 1.8 (1.4 to 2.4)           | 1.6 (1.1 to 2.1)                               | 27.5 (18.2 to 36.8)                 |
| Gabon                                                                                                                                                                          | 1.5 (1.2 to 1.9)           | 1.7 (1.4 to 2.2)           | 1.8 (1.4 to 2.3)           | 2.0 (1.6 to 2.6)           | 1.0 (0.5 to 1.5)                               | 15.9 (7.7 to 25.6)                  |
| <b>Eastern Sub-Saharan Africa</b>                                                                                                                                              |                            |                            |                            |                            |                                                |                                     |
| Burundi                                                                                                                                                                        | 1.5 (1.2 to 2.0)           | 1.6 (1.2 to 2.0)           | 1.6 (1.2 to 2.1)           | 1.7 (1.2 to 2.1)           | 0.3 (-0.2 to 0.7)                              | 4.3 (-2.7 to 11.8)                  |
| Comoros                                                                                                                                                                        | 0.7 (0.5 to 1.0)           | 0.8 (0.6 to 1.0)           | 0.8 (0.6 to 1.0)           | 0.9 (0.7 to 1.1)           | 0.6 (-0.1 to 1.3)                              | 10.2 (-1.5 to 21.9)                 |
| Djibouti                                                                                                                                                                       | 1.7 (1.3 to 2.2)           | 1.9 (1.5 to 2.5)           | 2.0 (1.5 to 2.5)           | 2.2 (1.7 to 2.8)           | 0.8 (0.3 to 1.3)                               | 13.0 (4.0 to 22.0)                  |
| Eritrea                                                                                                                                                                        | 1.6 (1.2 to 2.1)           | 1.8 (1.4 to 2.3)           | 1.8 (1.4 to 2.3)           | 2.0 (1.5 to 2.6)           | 0.7 (0.2 to 1.2)                               | 10.6 (2.3 to 19.7)                  |
| Ethiopia                                                                                                                                                                       | 1.3 (1.1 to 1.7)           | 1.6 (1.2 to 2.0)           | 1.6 (1.3 to 2.1)           | 1.9 (1.5 to 2.4)           | 1.1 (0.9 to 1.4)                               | 18.5 (14.8 to 22.5)                 |
| Kenya                                                                                                                                                                          | 1.4 (1.0 to 1.8)           | 1.4 (1.1 to 1.7)           | 1.4 (1.1 to 1.7)           | 1.4 (1.1 to 1.8)           | -0.1 (-0.3 to 0.1)                             | -1.6 (-4.7 to 0.9)                  |
| Madagascar                                                                                                                                                                     | 1.6 (1.2 to 2.0)           | 1.6 (1.3 to 2.1)           | 1.6 (1.3 to 2.1)           | 1.7 (1.3 to 2.2)           | 0.4 (-0.1 to 1.0)                              | 5.7 (-1.4 to 15.6)                  |
| Malawi                                                                                                                                                                         | 1.7 (1.3 to 2.1)           | 2.0 (1.5 to 2.6)           | 2.0 (1.5 to 2.6)           | 2.2 (1.7 to 2.8)           | 0.8 (0.1 to 1.4)                               | 13.3 (1.0 to 23.9)                  |
| Mozambique                                                                                                                                                                     | 2.3 (1.8 to 3.0)           | 2.6 (2.0 to 3.3)           | 2.6 (2.0 to 3.4)           | 3.0 (2.2 to 3.9)           | 1.1 (0.5 to 1.6)                               | 17.9 (8.6 to 27.8)                  |
| Rwanda                                                                                                                                                                         | 2.0 (1.5 to 2.5)           | 2.1 (1.7 to 2.8)           | 2.2 (1.7 to 2.8)           | 2.4 (1.9 to 3.1)           | 0.8 (0.3 to 1.4)                               | 13.0 (4.1 to 22.8)                  |
| Somalia                                                                                                                                                                        | 1.4 (1.1 to 1.7)           | 1.4 (1.1 to 1.8)           | 1.5 (1.1 to 1.9)           | 1.6 (1.2 to 2.0)           | 0.4 (-0.0 to 1.0)                              | 6.9 (-0.5 to 15.6)                  |
| South Sudan                                                                                                                                                                    | 1.4 (1.1 to 1.8)           | 1.5 (1.2 to 1.9)           | 1.5 (1.2 to 1.9)           | 1.6 (1.2 to 2.1)           | 0.5 (0.1 to 0.9)                               | 8.0 (1.9 to 14.5)                   |
| Tanzania                                                                                                                                                                       | 2.5 (2.0 to 3.3)           | 2.9 (2.3 to 3.6)           | 2.8 (2.1 to 3.5)           | 2.8 (2.1 to 3.7)           | -0.1 (-0.9 to 0.5)                             | -1.8 (-12.0 to 8.1)                 |
| Uganda                                                                                                                                                                         | 1.9 (1.4 to 2.4)           | 2.2 (1.8 to 2.9)           | 2.3 (1.8 to 2.9)           | 2.5 (1.9 to 3.4)           | 1.0 (0.4 to 1.6)                               | 17.0 (5.7 to 27.3)                  |
| Zambia                                                                                                                                                                         | 1.2 (0.9 to 1.5)           | 1.2 (0.9 to 1.5)           | 1.3 (1.0 to 1.6)           | 1.4 (1.0 to 1.8)           | 0.9 (0.2 to 1.5)                               | 14.4 (3.0 to 25.5)                  |
| <b>Southern Sub-Saharan Africa</b>                                                                                                                                             |                            |                            |                            |                            |                                                |                                     |
| Botswana                                                                                                                                                                       | 0.6 (0.5 to 0.8)           | 0.7 (0.5 to 0.9)           | 0.7 (0.5 to 0.9)           | 0.8 (0.6 to 1.0)           | 0.8 (0.1 to 1.4)                               | 12.9 (1.1 to 23.5)                  |
| Lesotho                                                                                                                                                                        | 0.9 (0.7 to 1.1)           | 1.0 (0.8 to 1.2)           | 1.0 (0.8 to 1.3)           | 1.1 (0.8 to 1.4)           | 0.7 (0.2 to 1.2)                               | 11.4 (3.6 to 19.8)                  |
| Namibia                                                                                                                                                                        | 0.5 (0.3 to 0.7)           | 0.6 (0.4 to 0.8)           | 0.6 (0.4 to 0.8)           | 0.7 (0.5 to 0.9)           | 0.8 (0.2 to 1.4)                               | 13.5 (3.0 to 23.7)                  |
| South Africa                                                                                                                                                                   | 1.1 (0.9 to 1.4)           | 1.2 (0.9 to 1.6)           | 1.2 (0.9 to 1.6)           | 1.3 (1.0 to 1.7)           | 0.5 (0.3 to 0.7)                               | 7.6 (5.0 to 10.3)                   |
| Swaziland                                                                                                                                                                      | 4.7 (3.6 to 6.1)           | 5.2 (4.0 to 6.7)           | 5.2 (4.1 to 6.7)           | 5.6 (4.3 to 7.2)           | 0.5 (0.0 to 1.0)                               | 8.2 (0.6 to 16.6)                   |
| Zimbabwe                                                                                                                                                                       | 0.7 (0.6 to 0.9)           | 0.7 (0.5 to 0.9)           | 0.7 (0.5 to 0.9)           | 0.7 (0.6 to 1.0)           | 0.5 (0.0 to 1.1)                               | 8.3 (0.3 to 18.3)                   |
| <b>Western Sub-Saharan Africa</b>                                                                                                                                              |                            |                            |                            |                            |                                                |                                     |
| Benin                                                                                                                                                                          | 0.4 (0.3 to 0.5)           | 0.4 (0.3 to 0.6)           | 0.4 (0.3 to 0.6)           | 0.5 (0.4 to 0.6)           | 0.7 (0.2 to 1.1)                               | 11.0 (2.4 to 18.7)                  |
| Burkina Faso                                                                                                                                                                   | 0.3 (0.3 to 0.5)           | 0.4 (0.3 to 0.5)           | 0.4 (0.3 to 0.5)           | 0.4 (0.3 to 0.6)           | 0.6 (0.3 to 1.0)                               | 9.8 (4.5 to 15.6)                   |
| Cameroon                                                                                                                                                                       | 0.4 (0.3 to 0.6)           | 0.5 (0.4 to 0.6)           | 0.5 (0.4 to 0.6)           | 0.6 (0.4 to 0.7)           | 0.8 (0.4 to 1.4)                               | 13.6 (5.6 to 22.5)                  |
| Cape Verde                                                                                                                                                                     | 0.5 (0.3 to 0.6)           | 0.5 (0.4 to 0.7)           | 0.5 (0.4 to 0.7)           | 0.6 (0.5 to 0.8)           | 0.9 (0.4 to 1.4)                               | 15.3 (6.9 to 23.9)                  |
| Chad                                                                                                                                                                           | 0.3 (0.2 to 0.3)           | 0.3 (0.2 to 0.4)           | 0.3 (0.2 to 0.4)           | 0.3 (0.2 to 0.4)           | 0.6 (0.0 to 1.2)                               | 9.8 (0.4 to 19.5)                   |
| Cote d'Ivoire                                                                                                                                                                  | 0.4 (0.3 to 0.5)           | 0.5 (0.3 to 0.6)           | 0.5 (0.3 to 0.6)           | 0.5 (0.4 to 0.7)           | 0.7 (0.2 to 1.2)                               | 10.3 (2.3 to 20.5)                  |
| The Gambia                                                                                                                                                                     | 0.2 (0.1 to 0.3)           | 0.2 (0.2 to 0.3)           | 0.2 (0.2 to 0.3)           | 0.3 (0.2 to 0.4)           | 0.7 (0.1 to 1.2)                               | 11.6 (1.8 to 20.0)                  |
| Ghana                                                                                                                                                                          | 1.0 (0.7 to 1.2)           | 1.1 (0.8 to 1.4)           | 1.1 (0.8 to 1.4)           | 1.2 (0.9 to 1.6)           | 0.7 (0.2 to 1.3)                               | 10.9 (2.6 to 21.5)                  |
| Guinea                                                                                                                                                                         | 0.4 (0.3 to 0.5)           | 0.4 (0.3 to 0.5)           | 0.4 (0.3 to 0.5)           | 0.4 (0.3 to 0.5)           | 0.8 (0.3 to 1.2)                               | 12.1 (4.4 to 19.1)                  |
| Guinea-Bissau                                                                                                                                                                  | 0.4 (0.3 to 0.5)           | 0.4 (0.3 to 0.5)           | 0.4 (0.3 to 0.6)           | 0.5 (0.3 to 0.6)           | 0.7 (0.2 to 1.3)                               | 12.0 (2.9 to 20.7)                  |
| Liberia                                                                                                                                                                        | 0.3 (0.3 to 0.5)           | 0.4 (0.3 to 0.5)           | 0.4 (0.3 to 0.5)           | 0.5 (0.3 to 0.6)           | 0.8 (0.4 to 1.3)                               | 12.7 (5.5 to 21.1)                  |
| Mali                                                                                                                                                                           | 0.2 (0.2 to 0.3)           | 0.2 (0.2 to 0.3)           | 0.2 (0.2 to 0.3)           | 0.2 (0.2 to 0.3)           | 0.6 (0.0 to 1.2)                               | 8.9 (-0.1 to 19.5)                  |
| Mauritania                                                                                                                                                                     | 0.4 (0.3 to 0.6)           | 0.5 (0.4 to 0.6)           | 0.5 (0.4 to 0.6)           | 0.5 (0.4 to 0.7)           | 0.7 (0.2 to 1.2)                               | 11.5 (3.8 to 20.6)                  |
| Niger                                                                                                                                                                          | 0.3 (0.2 to 0.4)           | 0.3 (0.3 to 0.5)           | 0.3 (0.3 to 0.5)           | 0.4 (0.3 to 0.5)           | 0.4 (0.0 to 0.8)                               | 6.9 (0.0 to 12.9)                   |
| Nigeria                                                                                                                                                                        | 0.5 (0.4 to 0.7)           | 0.6 (0.5 to 0.7)           | 0.6 (0.5 to 0.8)           | 0.7 (0.5 to 0.8)           | 0.7 (0.1 to 1.4)                               | 11.3 (1.2 to 22.8)                  |
| Sao Tome and Principe                                                                                                                                                          | 0.4 (0.3 to 0.6)           | 0.5 (0.4 to 0.6)           | 0.5 (0.4 to 0.7)           | 0.6 (0.4 to 0.8)           | 1.0 (0.4 to 1.5)                               | 15.9 (6.1 to 25.7)                  |
| Senegal                                                                                                                                                                        | 0.4 (0.3 to 0.5)           | 0.4 (0.3 to 0.6)           | 0.4 (0.3 to 0.6)           | 0.5 (0.3 to 0.6)           | 0.5 (0.1 to 1.1)                               | 8.4 (1.1 to 18.2)                   |
| Sierra Leone                                                                                                                                                                   | 0.4 (0.3 to 0.6)           | 0.5 (0.4 to 0.7)           | 0.5 (0.4 to 0.7)           | 0.6 (0.4 to 0.7)           | 0.8 (0.1 to 1.4)                               | 13.3 (2.2 to 22.4)                  |
| Togo                                                                                                                                                                           | 0.6 (0.4 to 0.7)           | 0.6 (0.5 to 0.8)           | 0.6 (0.5 to 0.8)           | 0.7 (0.5 to 0.9)           | 0.7 (0.1 to 1.2)                               | 10.8 (2.2 to 20.1)                  |
| <b>Indicator 6.1.1: Risk-weighted prevalence of populations using unsafe or unimproved water sources, as measured by the summary exposure value (SEV) for unsafe water (%)</b> |                            |                            |                            |                            |                                                |                                     |
| <b>Central Europe, Eastern Europe, and Central Asia</b>                                                                                                                        |                            |                            |                            |                            |                                                |                                     |
| <b>Central Asia</b>                                                                                                                                                            |                            |                            |                            |                            |                                                |                                     |
| Armenia                                                                                                                                                                        | 8.0 (4.5 to 10.3)          | 3.4 (1.9 to 4.8)           | 3.1 (1.7 to 4.5)           | 2.2 (1.2 to 3.1)           | -3.1 (-3.7 to -2.4)                            | -36.7 (-42.3 to -30.4)              |
| Azerbaijan                                                                                                                                                                     | 25.0 (18.9 to 29.0)        | 10.8 (7.2 to 14.2)         | 10.3 (6.6 to 13.8)         | 7.6 (5.0 to 10.3)          | -2.3 (-2.9 to -1.7)                            | -29.2 (-35.1 to -22.7)              |
| Georgia                                                                                                                                                                        | 12.7 (7.6 to 16.6)         | 10.6 (6.0 to 13.9)         | 9.8 (5.4 to 13.2)          | 7.2 (3.9 to 9.8)           | -2.6 (-3.1 to -2.0)                            | -31.9 (-37.3 to -26.3)              |
| Kazakhstan                                                                                                                                                                     | 16.4 (9.0 to 20.5)         | 11.0 (6.3 to 14.1)         | 10.0 (5.4 to 13.1)         | 7.7 (4.2 to 10.2)          | -2.4 (-3.0 to -1.7)                            | -30.2 (-36.1 to -22.1)              |
| Kyrgyzstan                                                                                                                                                                     | 21.7 (13.9 to 26.2)        | 16.3 (10.7 to 20.0)        | 15.7 (10.1 to 19.6)        | 11.6 (7.3 to 14.6)         | -2.2 (-2.7 to -1.8)                            | -28.6 (-33.7 to -23.7)              |
| Mongolia                                                                                                                                                                       | 31.6 (18.7 to 38.7)        | 31.0 (19.3 to 37.4)        | 30.1 (18.6 to 36.3)        | 29.0 (17.6 to 35.0)        | -0.4 (-0.7 to -0.2)                            | -6.4 (-9.3 to -3.5)                 |
| Tajikistan                                                                                                                                                                     | 27.7 (17.6 to 33.3)        | 24.2 (15.3 to 29.6)        | 23.6 (14.7 to 29.2)        | 20.9 (13.2 to 29.2)        | -1.0 (-1.4 to -0.5)                            | -13.3 (-18.7 to -6.7)               |
| Turkmenistan                                                                                                                                                                   | 25.4 (19.0 to 31.0)        | 20.5 (15.2 to 24.2)        | 19.2 (13.8 to 23.1)        | 14.0 (9.8 to 16.9)         | -2.6 (-3.0 to -2.2)                            | -31.8 (-36.5 to -27.6)              |

|                                    | Estimate in 2000 (95% UIs) | Estimate in 2015 (95% UIs) | Estimate in 2017 (95% UIs) | Estimate in 2020 (95% UIs) | Annualised rate of change, 2015-2020 (95% UIs) | Percent change, 2015-2020 (95% UIs) |
|------------------------------------|----------------------------|----------------------------|----------------------------|----------------------------|------------------------------------------------|-------------------------------------|
| Uzbekistan                         | 15.2 (6.3 to 19.8)         | 12.4 (4.9 to 17.4)         | 11.6 (4.7 to 16.6)         | 9.1 (4.6 to 13.1)          | -2.0 (-2.6 to -0.3)                            | -25.4 (-32.1 to -4.6)               |
| <b>Central Europe</b>              |                            |                            |                            |                            |                                                |                                     |
| Albania                            | 27.7 (23.8 to 31.9)        | 19.3 (14.4 to 24.4)        | 18.3 (13.2 to 23.8)        | 14.0 (10.0 to 18.5)        | -2.2 (-2.8 to -1.6)                            | -27.6 (-34.0 to -21.9)              |
| Bosnia and Herzegovina             | 13.0 (10.3 to 15.8)        | 7.7 (5.6 to 10.4)          | 7.2 (5.1 to 9.9)           | 6.4 (4.4 to 8.8)           | -1.3 (-2.0 to -0.6)                            | -17.7 (-25.8 to -9.1)               |
| Bulgaria                           | 9.5 (6.5 to 13.6)          | 6.3 (4.3 to 9.1)           | 6.0 (4.1 to 8.7)           | 5.4 (3.6 to 7.9)           | -1.1 (-1.7 to -0.4)                            | -14.6 (-22.9 to -5.9)               |
| Croatia                            | 7.2 (5.0 to 10.2)          | 4.7 (3.0 to 6.8)           | 4.6 (2.9 to 6.8)           | 4.3 (2.8 to 6.4)           | -0.6 (-1.3 to 0.1)                             | -8.2 (-17.1 to 1.1)                 |
| Czech Republic                     | 3.5 (2.3 to 5.0)           | 2.8 (1.8 to 4.1)           | 2.7 (1.8 to 4.0)           | 2.6 (1.7 to 3.8)           | -0.5 (-1.2 to 0.2)                             | -7.2 (-16.8 to 2.7)                 |
| Hungary                            | 4.9 (3.4 to 6.7)           | 3.5 (2.3 to 5.0)           | 3.3 (2.2 to 4.9)           | 3.1 (2.1 to 4.6)           | -0.7 (-1.4 to -0.0)                            | -10.3 (-19.0 to -0.1)               |
| Macedonia                          | 9.5 (6.6 to 12.9)          | 6.2 (4.4 to 8.3)           | 5.9 (4.2 to 8.2)           | 5.4 (3.8 to 7.5)           | -0.9 (-1.5 to -0.3)                            | -12.7 (-20.6 to -4.5)               |
| Montenegro                         | 18.7 (13.5 to 25.5)        | 13.6 (9.9 to 18.6)         | 13.0 (9.2 to 18.2)         | 10.5 (7.3 to 14.8)         | -1.7 (-2.4 to -1.1)                            | -22.8 (-30.2 to -15.0)              |
| Poland                             | 7.0 (4.8 to 10.1)          | 4.2 (2.8 to 6.0)           | 4.0 (2.6 to 5.7)           | 3.6 (2.4 to 5.1)           | -1.0 (-1.7 to -0.4)                            | -14.3 (-22.2 to -5.5)               |
| Romania                            | 18.3 (13.8 to 23.5)        | 8.9 (6.0 to 12.6)          | 8.4 (5.7 to 12.1)          | 6.5 (4.4 to 9.4)           | -2.1 (-2.8 to -1.5)                            | -27.0 (-34.7 to -19.6)              |
| Serbia                             | 10.7 (6.0 to 14.4)         | 5.5 (2.9 to 7.5)           | 5.3 (2.7 to 7.3)           | 4.0 (2.0 to 5.6)           | -2.2 (-2.8 to -1.5)                            | -27.7 (-34.4 to -20.5)              |
| Slovakia                           | 4.6 (3.1 to 6.5)           | 3.1 (2.1 to 4.6)           | 3.1 (2.0 to 4.5)           | 2.9 (1.9 to 4.2)           | -0.7 (-1.3 to -0.0)                            | -9.3 (-18.0 to -0.0)                |
| Slovenia                           | 3.4 (2.3 to 4.7)           | 2.5 (1.8 to 3.6)           | 2.4 (1.7 to 3.4)           | 2.3 (1.6 to 3.2)           | -0.6 (-1.3 to 0.1)                             | -8.5 (-17.3 to 1.4)                 |
| <b>Eastern Europe</b>              |                            |                            |                            |                            |                                                |                                     |
| Belarus                            | 16.7 (13.7 to 19.6)        | 6.0 (4.4 to 8.1)           | 5.7 (4.0 to 7.8)           | 4.9 (3.5 to 6.7)           | -1.4 (-2.2 to -0.7)                            | -19.2 (-28.6 to -9.6)               |
| Estonia                            | 7.8 (5.5 to 10.7)          | 4.7 (3.0 to 6.6)           | 4.6 (2.9 to 6.6)           | 4.1 (2.6 to 6.0)           | -0.9 (-1.6 to -0.2)                            | -11.9 (-20.8 to -2.3)               |
| Latvia                             | 9.7 (6.8 to 13.1)          | 6.0 (4.0 to 8.5)           | 5.8 (3.8 to 8.2)           | 5.3 (3.4 to 7.4)           | -0.9 (-1.5 to -0.2)                            | -12.2 (-20.6 to -3.0)               |
| Lithuania                          | 10.2 (6.7 to 14.2)         | 5.8 (3.8 to 8.5)           | 5.7 (3.7 to 8.2)           | 5.0 (3.2 to 7.3)           | -0.9 (-1.6 to -0.3)                            | -12.9 (-21.1 to -3.9)               |
| Moldova                            | 36.0 (31.4 to 40.3)        | 23.2 (19.4 to 27.2)        | 22.3 (17.9 to 26.6)        | 16.6 (13.2 to 20.1)        | -2.2 (-2.8 to -1.7)                            | -28.6 (-35.8 to -22.9)              |
| Russia                             | 12.2 (9.1 to 15.6)         | 8.3 (5.8 to 11.9)          | 8.0 (5.5 to 11.2)          | 7.2 (4.9 to 10.2)          | -1.0 (-1.6 to -0.4)                            | -13.3 (-20.9 to -5.6)               |
| Ukraine                            | 15.5 (12.4 to 19.1)        | 14.1 (10.8 to 17.4)        | 13.7 (10.2 to 17.2)        | 12.1 (8.9 to 15.3)         | -1.0 (-1.6 to -0.5)                            | -14.2 (-21.1 to -7.1)               |
| <b>High-income</b>                 |                            |                            |                            |                            |                                                |                                     |
| <b>Australasia</b>                 |                            |                            |                            |                            |                                                |                                     |
| Australia                          | 1.7 (1.1 to 2.5)           | 1.8 (1.2 to 2.7)           | 1.7 (1.2 to 2.6)           | 1.7 (1.1 to 2.5)           | -0.4 (-1.1 to 0.3)                             | -5.4 (-15.3 to 4.4)                 |
| New Zealand                        | 2.2 (1.4 to 3.1)           | 2.3 (1.5 to 3.4)           | 2.3 (1.5 to 3.3)           | 2.2 (1.4 to 3.1)           | -0.4 (-1.1 to 0.3)                             | -5.7 (-14.9 to 4.8)                 |
| <b>High-income Asia Pacific</b>    |                            |                            |                            |                            |                                                |                                     |
| Brunei                             | 2.3 (1.5 to 3.4)           | 2.0 (1.4 to 2.9)           | 2.0 (1.3 to 2.8)           | 1.9 (1.2 to 2.7)           | -0.5 (-1.2 to 0.2)                             | -7.2 (-16.7 to 2.7)                 |
| Japan                              | 1.6 (1.0 to 2.4)           | 1.9 (1.2 to 2.7)           | 1.9 (1.2 to 2.7)           | 1.8 (1.2 to 2.6)           | -0.3 (-1.0 to 0.4)                             | -4.6 (-13.7 to 5.5)                 |
| South Korea                        | 2.1 (1.3 to 3.0)           | 1.8 (1.2 to 2.8)           | 1.8 (1.2 to 2.6)           | 1.7 (1.1 to 2.5)           | -0.5 (-1.2 to 0.2)                             | -7.2 (-16.8 to 2.9)                 |
| Singapore                          | 2.1 (1.4 to 3.0)           | 1.8 (1.2 to 2.6)           | 1.7 (1.1 to 2.5)           | 1.7 (1.1 to 2.5)           | -0.5 (-1.2 to 0.2)                             | -6.7 (-15.9 to 3.2)                 |
| <b>High-income North America</b>   |                            |                            |                            |                            |                                                |                                     |
| Canada                             | 0.9 (0.6 to 1.4)           | 0.3 (0.2 to 0.5)           | 0.3 (0.2 to 0.5)           | 0.3 (0.2 to 0.4)           | -0.3 (-1.0 to 0.2)                             | -5.0 (-13.8 to 3.7)                 |
| Greenland                          | 2.5 (1.7 to 3.7)           | 0.7 (0.4 to 1.0)           | 0.7 (0.4 to 1.0)           | 0.5 (0.3 to 0.8)           | -1.4 (-2.3 to -0.6)                            | -18.5 (-29.7 to -8.0)               |
| United States                      | 1.3 (0.9 to 1.9)           | 0.3 (0.2 to 0.5)           | 0.3 (0.2 to 0.5)           | 0.3 (0.2 to 0.4)           | -0.9 (-1.8 to -0.1)                            | -12.0 (-23.5 to -1.2)               |
| <b>Southern Latin America</b>      |                            |                            |                            |                            |                                                |                                     |
| Argentina                          | 18.8 (14.1 to 23.7)        | 8.7 (6.2 to 11.9)          | 8.2 (5.8 to 11.3)          | 5.8 (4.1 to 8.1)           | -2.7 (-3.4 to -2.0)                            | -32.8 (-39.6 to -26.2)              |
| Chile                              | 6.5 (4.7 to 8.7)           | 3.8 (2.6 to 5.4)           | 3.7 (2.5 to 5.1)           | 2.5 (1.7 to 3.5)           | -2.7 (-3.3 to -2.2)                            | -33.5 (-39.1 to -27.8)              |
| Uruguay                            | 8.9 (6.9 to 11.4)          | 6.1 (4.5 to 8.2)           | 5.7 (4.2 to 7.9)           | 4.0 (2.9 to 5.5)           | -2.8 (-3.4 to -2.3)                            | -34.7 (-40.2 to -28.9)              |
| <b>Western Europe</b>              |                            |                            |                            |                            |                                                |                                     |
| Andorra                            | 0.3 (0.2 to 0.4)           | 0.2 (0.2 to 0.3)           | 0.2 (0.2 to 0.3)           | 0.2 (0.2 to 0.3)           | -0.3 (-0.8 to 0.3)                             | -4.1 (-11.4 to 4.2)                 |
| Austria                            | 0.3 (0.2 to 0.5)           | 0.2 (0.2 to 0.3)           | 0.2 (0.2 to 0.3)           | 0.2 (0.1 to 0.3)           | -1.7 (-2.3 to -1.2)                            | -22.4 (-28.8 to -16.1)              |
| Belgium                            | 0.4 (0.3 to 0.5)           | 0.3 (0.2 to 0.4)           | 0.3 (0.2 to 0.4)           | 0.3 (0.2 to 0.4)           | -0.4 (-0.9 to 0.1)                             | -5.1 (-12.4 to 2.3)                 |
| Cyprus                             | 0.6 (0.5 to 0.8)           | 0.5 (0.4 to 0.7)           | 0.5 (0.4 to 0.6)           | 0.5 (0.3 to 0.6)           | -0.8 (-1.8 to -0.2)                            | -11.8 (-23.4 to -3.3)               |
| Denmark                            | 0.3 (0.2 to 0.4)           | 0.3 (0.2 to 0.3)           | 0.3 (0.2 to 0.3)           | 0.2 (0.2 to 0.3)           | -0.3 (-0.7 to 0.2)                             | -4.1 (-10.6 to 2.9)                 |
| Finland                            | 0.3 (0.2 to 0.4)           | 0.2 (0.2 to 0.3)           | 0.2 (0.2 to 0.3)           | 0.2 (0.2 to 0.3)           | -0.4 (-1.0 to 0.1)                             | -5.9 (-14.3 to 2.2)                 |
| France                             | 0.7 (0.5 to 1.0)           | 0.5 (0.4 to 0.7)           | 0.5 (0.4 to 0.7)           | 0.5 (0.3 to 0.7)           | -0.4 (-1.1 to 0.2)                             | -6.1 (-14.7 to 3.1)                 |
| Germany                            | 0.4 (0.3 to 0.6)           | 0.3 (0.2 to 0.4)           | 0.3 (0.2 to 0.4)           | 0.2 (0.2 to 0.3)           | -1.8 (-2.4 to -1.3)                            | -24.1 (-30.3 to -18.1)              |
| Greece                             | 0.3 (0.2 to 0.4)           | 0.2 (0.2 to 0.3)           | 0.2 (0.2 to 0.3)           | 0.2 (0.2 to 0.3)           | -0.2 (-0.7 to 0.2)                             | -2.7 (-9.4 to 3.8)                  |
| Iceland                            | 0.3 (0.2 to 0.4)           | 0.2 (0.2 to 0.3)           | 0.2 (0.2 to 0.3)           | 0.2 (0.2 to 0.3)           | -0.6 (-1.2 to -0.0)                            | -8.3 (-15.9 to -0.2)                |
| Ireland                            | 0.4 (0.3 to 0.5)           | 0.3 (0.2 to 0.4)           | 0.3 (0.2 to 0.4)           | 0.2 (0.2 to 0.3)           | -0.8 (-1.5 to -0.2)                            | -11.0 (-20.4 to -2.8)               |
| Israel                             | 0.5 (0.3 to 0.7)           | 0.4 (0.3 to 0.6)           | 0.4 (0.3 to 0.6)           | 0.3 (0.2 to 0.5)           | -1.4 (-2.1 to -0.7)                            | -19.2 (-27.3 to -10.3)              |
| Italy                              | 0.6 (0.4 to 0.7)           | 0.5 (0.4 to 0.7)           | 0.5 (0.4 to 0.7)           | 0.4 (0.3 to 0.6)           | -1.3 (-1.9 to -0.8)                            | -17.7 (-24.9 to -11.3)              |
| Luxembourg                         | 0.3 (0.2 to 0.4)           | 0.3 (0.2 to 0.3)           | 0.3 (0.2 to 0.3)           | 0.3 (0.2 to 0.3)           | -0.3 (-0.7 to 0.2)                             | -4.2 (-10.5 to 2.6)                 |
| Malta                              | 0.5 (0.3 to 0.7)           | 0.3 (0.2 to 0.5)           | 0.3 (0.2 to 0.5)           | 0.3 (0.2 to 0.4)           | -1.5 (-2.2 to -0.8)                            | -19.7 (-28.4 to -11.0)              |
| Netherlands                        | 0.3 (0.2 to 0.4)           | 0.2 (0.2 to 0.3)           | 0.2 (0.2 to 0.3)           | 0.2 (0.2 to 0.3)           | -0.3 (-0.9 to 0.2)                             | -5.0 (-12.6 to 2.7)                 |
| Norway                             | 0.3 (0.2 to 0.4)           | 0.2 (0.2 to 0.3)           | 0.2 (0.2 to 0.3)           | 0.2 (0.2 to 0.3)           | -0.4 (-0.9 to 0.2)                             | -5.3 (-13.1 to 2.7)                 |
| Portugal                           | 2.0 (1.3 to 2.8)           | 1.1 (0.8 to 1.6)           | 1.1 (0.8 to 1.6)           | 0.8 (0.5 to 1.1)           | -2.3 (-3.0 to -1.6)                            | -28.7 (-35.9 to -21.3)              |
| Spain                              | 0.6 (0.4 to 0.8)           | 0.5 (0.3 to 0.6)           | 0.4 (0.3 to 0.6)           | 0.4 (0.3 to 0.6)           | -0.3 (-0.8 to 0.2)                             | -4.3 (-11.5 to 3.5)                 |
| Sweden                             | 0.3 (0.2 to 0.5)           | 0.3 (0.2 to 0.4)           | 0.3 (0.2 to 0.4)           | 0.3 (0.2 to 0.4)           | -0.5 (-1.1 to 0.0)                             | -7.8 (-15.7 to 0.2)                 |
| Switzerland                        | 0.3 (0.2 to 0.4)           | 0.3 (0.2 to 0.4)           | 0.3 (0.2 to 0.4)           | 0.2 (0.2 to 0.3)           | -0.4 (-0.9 to 0.2)                             | -5.4 (-12.3 to 3.3)                 |
| United Kingdom                     | 0.5 (0.3 to 0.7)           | 0.3 (0.2 to 0.5)           | 0.3 (0.2 to 0.5)           | 0.3 (0.2 to 0.4)           | -1.8 (-2.5 to -1.2)                            | -24.1 (-31.4 to -16.5)              |
| <b>Latin America and Caribbean</b> |                            |                            |                            |                            |                                                |                                     |
| <b>Andean Latin America</b>        |                            |                            |                            |                            |                                                |                                     |
| Bolivia                            | 33.7 (29.3 to 37.8)        | 19.3 (14.9 to 23.1)        | 18.1 (13.9 to 22.1)        | 13.1 (10.2 to 16.1)        | -2.6 (-3.0 to -2.2)                            | -32.0 (-36.1 to -28.1)              |
| Ecuador                            | 21.7 (17.7 to 25.6)        | 16.7 (12.5 to 20.6)        | 16.4 (12.1 to 20.2)        | 12.0 (8.9 to 15.0)         | -2.2 (-2.6 to -1.9)                            | -28.4 (-32.4 to -24.9)              |
| Peru                               | 30.0 (22.0 to 34.3)        | 19.0 (13.3 to 22.2)        | 18.6 (12.9 to 21.9)        | 13.6 (9.9 to 16.1)         | -2.2 (-2.5 to -1.9)                            | -28.4 (-31.7 to -25.1)              |
| <b>Caribbean</b>                   |                            |                            |                            |                            |                                                |                                     |
| Antigua and Barbuda                | 42.3 (37.0 to 47.5)        | 40.0 (34.3 to 45.5)        | 39.4 (33.8 to 44.6)        | 36.1 (30.8 to 41.2)        | -0.7 (-0.9 to -0.5)                            | -9.8 (-12.2 to -7.5)                |
| The Bahamas                        | 31.9 (26.5 to 37.4)        | 33.4 (28.0 to 38.5)        | 33.3 (28.0 to 38.4)        | 31.8 (26.5 to 36.8)        | -0.3 (-0.5 to -0.1)                            | -4.9 (-7.8 to -2.2)                 |
| Barbados                           | 22.9 (18.0 to 28.2)        | 21.7 (16.6 to 27.0)        | 21.7 (16.7 to 26.8)        | 19.6 (15.0 to 24.4)        | -0.7 (-1.0 to -0.4)                            | -9.7 (-14.2 to -5.4)                |
| Belize                             | 69.4 (61.3 to 78.5)        | 70.9 (62.6 to 80.2)        | 70.3 (62.2 to 79.7)        | 68.4 (59.9 to 78.0)        | -0.2 (-0.3 to -0.1)                            | -3.5 (-4.8 to -2.2)                 |
| Bermuda                            | 31.4 (26.0 to 36.9)        | 31.9 (27.1 to 37.1)        | 31.8 (27.1 to 36.9)        | 29.9 (25.5 to 34.8)        | -0.5 (-0.6 to -0.3)                            | -6.5 (-9.1 to -3.7)                 |
| Cuba                               | 51.9 (46.3 to 57.1)        | 41.5 (35.8 to 46.8)        | 40.2 (34.6 to 45.1)        | 31.8 (26.8 to 36.5)        | -1.8 (-2.1 to -1.6)                            | -23.5 (-26.5 to -20.9)              |
| Dominica                           | 50.0 (44.1 to 55.4)        | 44.2 (38.6 to 49.3)        | 43.5 (38.0 to 48.7)        | 39.4 (34.1 to 44.5)        | -0.8 (-0.9 to -0.6)                            | -10.7 (-13.1 to -8.5)               |
| Dominican Republic                 | 65.2 (58.9 to 70.3)        | 63.3 (57.1 to 68.3)        | 62.4 (56.3 to 67.4)        | 59.9 (53.7 to 65.0)        | -0.4 (-0.5 to -0.3)                            | -5.4 (-6.8 to -3.9)                 |
| Grenada                            | 43.4 (37.3 to 49.5)        | 40.4 (34.3 to 45.9)        | 39.7 (33.7 to 45.1)        | 33.4 (27.8 to 38.6)        | -1.3 (-1.6 to -1.0)                            | -17.2 (-21.2 to -13.9)              |
| Guyana                             | 57.7 (51.1 to 63.3)        | 62.6 (56.0 to 67.9)        | 61.9 (55.4 to 67.0)        | 58.1 (51.6 to 64.0)        | -0.5 (-0.6 to -0.3)                            | -7.2 (-9.2 to -4.9)                 |
| Haiti                              | 77.5 (72.2 to 82.6)        | 74.8 (69.7 to 79.4)        | 74.4 (68.9 to 79.0)        | 73.4 (67.8 to 78.2)        | -0.1 (-0.2 to -0.1)                            | -1.9 (-2.7 to -1.3)                 |

|                                               | Estimate in 2000 (95% UIs) | Estimate in 2015 (95% UIs) | Estimate in 2017 (95% UIs) | Estimate in 2030 (95% UIs) | Annualised rate of change, 2015-2030 (95% UIs) | Percent change, 2015-2030 (95% UIs) |
|-----------------------------------------------|----------------------------|----------------------------|----------------------------|----------------------------|------------------------------------------------|-------------------------------------|
| <b>Jamaica</b>                                | 43.9 (38.4 to 48.6)        | 41.2 (36.3 to 46.1)        | 40.8 (35.9 to 45.5)        | 37.6 (32.7 to 42.3)        | -0.6 (-0.5 to -0.9)                            | -8.7 (-11.3 to -6.4)                |
| <b>Puerto Rico</b>                            | 32.9 (28.0 to 38.0)        | 31.4 (26.3 to 36.8)        | 31.2 (26.2 to 36.6)        | 30.0 (25.1 to 35.3)        | -0.3 (-0.5 to -0.1)                            | -4.2 (-7.6 to -1.2)                 |
| <b>Saint Lucia</b>                            | 42.2 (35.9 to 48.5)        | 40.8 (34.8 to 46.1)        | 40.1 (34.1 to 45.7)        | 35.7 (30.2 to 41.1)        | -0.9 (-1.1 to -0.7)                            | -12.4 (-15.5 to -9.8)               |
| <b>Saint Vincent and the Grenadines</b>       | 50.6 (44.5 to 57.0)        | 48.5 (42.4 to 54.6)        | 47.7 (41.5 to 53.9)        | 44.0 (38.0 to 50.1)        | -0.6 (-0.8 to -0.5)                            | -9.2 (-11.7 to -7.0)                |
| <b>Suriname</b>                               | 48.4 (42.6 to 54.1)        | 44.7 (38.8 to 50.0)        | 44.4 (38.5 to 49.8)        | 37.4 (31.7 to 42.6)        | -1.2 (-1.4 to -1.0)                            | -16.4 (-19.0 to -13.8)              |
| <b>Trinidad and Tobago</b>                    | 42.2 (37.8 to 46.1)        | 35.1 (29.3 to 40.0)        | 34.5 (29.3 to 39.6)        | 31.3 (25.8 to 36.6)        | -0.8 (-1.2 to -0.5)                            | -11.0 (-16.4 to -6.7)               |
| <b>Virgin Islands, U.S.</b>                   | 33.9 (28.5 to 39.3)        | 33.4 (28.2 to 38.5)        | 33.3 (28.1 to 38.5)        | 32.1 (27.0 to 37.3)        | -0.3 (-0.5 to -0.1)                            | -3.9 (-7.1 to -0.9)                 |
| <b>Central Latin America</b>                  |                            |                            |                            |                            |                                                |                                     |
| <b>Colombia</b>                               | 24.8 (20.3 to 29.8)        | 20.5 (17.0 to 24.3)        | 19.5 (16.1 to 23.0)        | 14.3 (11.7 to 17.1)        | -2.4 (-2.7 to -2.1)                            | -30.2 (-33.5 to -26.6)              |
| <b>Costa Rica</b>                             | 10.1 (7.7 to 12.8)         | 7.2 (5.4 to 9.3)           | 6.5 (4.9 to 8.5)           | 4.5 (3.1 to 5.9)           | -3.1 (-3.5 to -2.7)                            | -37.1 (-41.1 to -33.2)              |
| <b>El Salvador</b>                            | 32.4 (27.3 to 37.9)        | 24.8 (19.9 to 30.1)        | 23.6 (18.6 to 28.7)        | 19.0 (14.8 to 23.4)        | -1.8 (-2.2 to -1.4)                            | -23.4 (-27.8 to -18.9)              |
| <b>Guatemala</b>                              | 53.2 (47.0 to 59.1)        | 45.5 (40.7 to 50.2)        | 43.0 (38.2 to 47.9)        | 35.9 (31.3 to 40.9)        | -1.6 (-1.8 to -1.3)                            | -21.2 (-24.2 to -18.3)              |
| <b>Honduras</b>                               | 30.6 (25.8 to 35.8)        | 25.1 (20.0 to 30.7)        | 23.6 (18.4 to 29.0)        | 19.4 (15.1 to 24.3)        | -1.8 (-2.1 to -1.4)                            | -23.1 (-27.5 to -18.7)              |
| <b>Mexico</b>                                 | 10.4 (8.6 to 12.4)         | 7.0 (5.4 to 9.1)           | 6.8 (5.1 to 8.9)           | 4.8 (3.6 to 6.4)           | -2.5 (-3.0 to -2.0)                            | -31.2 (-36.4 to -25.6)              |
| <b>Nicaragua</b>                              | 51.4 (46.8 to 56.0)        | 31.9 (26.4 to 37.6)        | 30.1 (24.6 to 35.8)        | 25.6 (20.8 to 31.0)        | -1.5 (-1.8 to -1.1)                            | -19.9 (-24.2 to -15.3)              |
| <b>Panama</b>                                 | 28.7 (24.1 to 33.6)        | 18.9 (15.0 to 23.2)        | 17.2 (13.5 to 21.2)        | 13.5 (10.5 to 17.0)        | -2.2 (-2.7 to -1.8)                            | -28.5 (-33.0 to -23.8)              |
| <b>Venezuela</b>                              | 20.5 (17.0 to 24.4)        | 15.5 (12.6 to 18.8)        | 14.7 (11.9 to 18.1)        | 10.7 (8.8 to 13.3)         | -2.5 (-2.8 to -2.1)                            | -30.8 (-34.7 to -27.1)              |
| <b>Tropical Latin America</b>                 |                            |                            |                            |                            |                                                |                                     |
| <b>Brazil</b>                                 | 18.0 (14.3 to 22.4)        | 10.3 (7.7 to 13.1)         | 9.8 (7.4 to 12.8)          | 7.5 (5.7 to 10.0)          | -2.1 (-2.6 to -1.5)                            | -26.5 (-32.0 to -20.5)              |
| <b>Paraguay</b>                               | 38.5 (34.0 to 43.2)        | 19.9 (15.6 to 25.0)        | 18.7 (14.4 to 23.7)        | 13.7 (10.4 to 17.6)        | -2.5 (-3.0 to -2.0)                            | -31.1 (-36.6 to -25.9)              |
| <b>North Africa and Middle East</b>           |                            |                            |                            |                            |                                                |                                     |
| <b>Alghanistan</b>                            | 89.3 (84.8 to 94.7)        | 83.4 (76.6 to 91.8)        | 82.6 (75.7 to 91.5)        | 81.9 (74.7 to 91.0)        | -0.1 (-0.2 to -0.1)                            | -1.8 (-2.9 to -0.9)                 |
| <b>Algeria</b>                                | 20.6 (16.9 to 24.6)        | 13.1 (10.4 to 16.2)        | 12.3 (9.5 to 15.7)         | 8.7 (6.9 to 11.2)          | -2.7 (-3.2 to -2.2)                            | -33.5 (-38.3 to -28.1)              |
| <b>Bahrain</b>                                | 14.6 (10.3 to 19.9)        | 14.0 (10.1 to 19.1)        | 13.5 (9.8 to 18.2)         | 10.9 (7.9 to 15.0)         | -1.7 (-2.2 to -1.1)                            | -21.9 (-28.5 to -14.8)              |
| <b>Egypt</b>                                  | 17.5 (13.1 to 22.3)        | 9.9 (6.9 to 13.4)          | 8.9 (6.2 to 12.2)          | 6.2 (4.3 to 7.8)           | -3.1 (-3.7 to -2.5)                            | -37.3 (-42.8 to -31.2)              |
| <b>Iran</b>                                   | 19.0 (14.0 to 25.0)        | 15.0 (11.4 to 19.2)        | 14.4 (11.0 to 18.3)        | 12.0 (9.1 to 15.4)         | -1.5 (-2.0 to -1.0)                            | -19.7 (-26.3 to -13.5)              |
| <b>Iraq</b>                                   | 22.5 (19.0 to 26.4)        | 21.7 (16.9 to 27.2)        | 21.4 (16.3 to 27.4)        | 17.5 (13.2 to 22.4)        | -1.4 (-2.0 to -0.8)                            | -19.2 (-26.3 to -11.8)              |
| <b>Jordan</b>                                 | 14.2 (10.2 to 18.9)        | 9.8 (6.8 to 13.7)          | 9.4 (6.5 to 13.2)          | 6.7 (4.5 to 9.4)           | -2.6 (-3.2 to -1.9)                            | -31.8 (-38.3 to -25.0)              |
| <b>Kuwait</b>                                 | 12.9 (9.1 to 17.9)         | 9.7 (7.0 to 13.3)          | 9.3 (6.8 to 12.6)          | 7.1 (5.1 to 9.8)           | -2.1 (-2.8 to -1.6)                            | -27.5 (-34.4 to -20.8)              |
| <b>Lebanon</b>                                | 36.5 (31.0 to 42.3)        | 29.6 (24.5 to 35.1)        | 27.3 (22.3 to 33.0)        | 20.8 (16.5 to 25.4)        | -2.4 (-2.8 to -1.9)                            | -29.7 (-34.0 to -24.6)              |
| <b>Libya</b>                                  | 15.5 (11.7 to 19.8)        | 15.6 (11.7 to 20.1)        | 15.8 (12.0 to 20.5)        | 13.4 (10.0 to 17.9)        | -1.0 (-1.5 to -0.4)                            | -13.9 (-23.6 to -5.5)               |
| <b>Morocco</b>                                | 44.8 (39.6 to 49.4)        | 29.9 (23.2 to 36.7)        | 28.2 (21.7 to 35.3)        | 21.0 (15.8 to 26.9)        | -2.4 (-2.9 to -1.9)                            | -29.8 (-35.1 to -24.3)              |
| <b>Palestine</b>                              | 38.1 (32.0 to 44.8)        | 38.9 (35.0 to 42.8)        | 37.3 (32.3 to 42.3)        | 32.4 (27.8 to 37.2)        | -1.2 (-1.7 to -0.8)                            | -16.8 (-23.1 to -10.8)              |
| <b>Oman</b>                                   | 44.5 (36.6 to 53.7)        | 18.6 (13.4 to 24.4)        | 17.6 (12.8 to 23.1)        | 12.7 (9.0 to 17.0)         | -2.6 (-3.1 to -2.1)                            | -32.0 (-37.6 to -26.5)              |
| <b>Qatar</b>                                  | 12.0 (8.5 to 16.6)         | 10.8 (7.9 to 14.2)         | 10.4 (7.6 to 13.9)         | 8.3 (6.1 to 11.3)          | -1.7 (-2.3 to -1.2)                            | -22.5 (-29.3 to -16.1)              |
| <b>Saudi Arabia</b>                           | 23.4 (17.5 to 30.6)        | 10.4 (7.2 to 14.6)         | 9.5 (6.6 to 13.5)          | 6.7 (4.6 to 9.6)           | -2.9 (-3.6 to -2.3)                            | -35.6 (-41.7 to -29.7)              |
| <b>Sudan</b>                                  | 65.2 (58.8 to 71.5)        | 63.1 (56.6 to 70.4)        | 59.8 (52.6 to 67.5)        | 52.2 (44.7 to 60.7)        | -1.3 (-1.7 to -0.8)                            | -17.3 (-22.0 to -12.0)              |
| <b>Syria</b>                                  | 21.3 (15.3 to 28.9)        | 14.9 (10.6 to 20.3)        | 14.1 (10.0 to 19.4)        | 10.0 (7.0 to 14.0)         | -2.6 (-3.2 to -2.1)                            | -32.6 (-38.5 to -26.7)              |
| <b>Tunisia</b>                                | 25.9 (20.4 to 32.2)        | 21.4 (16.3 to 27.2)        | 20.2 (15.3 to 26.0)        | 15.9 (12.0 to 20.9)        | -2.0 (-2.6 to -1.4)                            | -25.7 (-32.0 to -18.6)              |
| <b>Turkey</b>                                 | 36.0 (31.9 to 40.6)        | 25.2 (19.5 to 31.6)        | 22.7 (17.4 to 28.9)        | 16.8 (12.4 to 21.8)        | -2.7 (-3.2 to -2.2)                            | -33.4 (-38.0 to -28.4)              |
| <b>United Arab Emirates</b>                   | 15.7 (11.9 to 20.4)        | 11.9 (8.8 to 15.8)         | 11.7 (8.6 to 15.6)         | 9.1 (6.6 to 12.3)          | -1.8 (-2.2 to -1.3)                            | -23.2 (-28.6 to -17.1)              |
| <b>Yemen</b>                                  | 70.3 (63.4 to 77.5)        | 55.1 (47.4 to 64.1)        | 54.0 (46.2 to 63.1)        | 48.4 (40.9 to 58.1)        | -0.9 (-1.2 to -0.5)                            | -12.2 (-16.6 to -7.5)               |
| <b>South Asia</b>                             |                            |                            |                            |                            |                                                |                                     |
| <b>Bangladesh</b>                             | 80.9 (71.0 to 94.2)        | 77.8 (67.9 to 90.9)        | 77.3 (67.5 to 90.4)        | 76.2 (66.1 to 89.8)        | -0.1 (-0.2 to -0.1)                            | -2.1 (-2.8 to -1.2)                 |
| <b>Bhutan</b>                                 | 46.0 (38.2 to 53.9)        | 23.6 (18.4 to 29.7)        | 22.2 (17.2 to 28.4)        | 17.9 (13.4 to 23.6)        | -1.9 (-2.6 to -1.2)                            | -24.4 (-32.0 to -16.5)              |
| <b>India</b>                                  | 57.2 (53.5 to 59.7)        | 52.3 (47.6 to 54.6)        | 51.0 (46.3 to 54.6)        | 45.2 (40.9 to 49.1)        | -1.0 (-1.2 to -0.7)                            | -13.7 (-15.9 to -10.5)              |
| <b>Nepal</b>                                  | 78.7 (71.0 to 87.7)        | 68.3 (60.1 to 77.8)        | 67.0 (59.0 to 76.5)        | 60.1 (51.5 to 70.3)        | -0.9 (-1.1 to -0.6)                            | -12.1 (-15.4 to -8.6)               |
| <b>Pakistan</b>                               | 69.8 (62.3 to 78.7)        | 71.9 (63.1 to 83.2)        | 71.7 (62.7 to 83.0)        | 68.8 (59.4 to 80.7)        | -0.3 (-0.4 to -0.2)                            | -4.4 (-6.3 to -2.5)                 |
| <b>Southeast Asia, East Asia, and Oceania</b> |                            |                            |                            |                            |                                                |                                     |
| <b>East Asia</b>                              |                            |                            |                            |                            |                                                |                                     |
| <b>China</b>                                  | 37.2 (33.8 to 40.4)        | 19.8 (15.4 to 24.6)        | 18.1 (13.5 to 23.0)        | 13.8 (10.1 to 17.6)        | -2.4 (-3.0 to -1.9)                            | -30.5 (-35.8 to -24.9)              |
| <b>North Korea</b>                            | 13.4 (9.9 to 17.1)         | 9.7 (6.7 to 13.3)          | 9.3 (6.3 to 12.8)          | 8.5 (5.7 to 11.6)          | -0.9 (-1.5 to -0.2)                            | -12.4 (-20.7 to -3.6)               |
| <b>Taiwan (Province of China)</b>             | 8.5 (5.7 to 12.0)          | 4.3 (2.7 to 6.4)           | 4.1 (2.6 to 6.1)           | 3.7 (2.4 to 5.5)           | -1.0 (-1.6 to -0.3)                            | -13.5 (-21.7 to -4.6)               |
| <b>Oceania</b>                                |                            |                            |                            |                            |                                                |                                     |
| <b>American Samoa</b>                         | 30.0 (24.7 to 35.0)        | 20.4 (16.1 to 24.7)        | 20.0 (15.8 to 24.3)        | 17.2 (13.4 to 21.0)        | -1.1 (-1.5 to -0.8)                            | -15.7 (-20.6 to -10.9)              |
| <b>Federated States of Micronesia</b>         | 47.0 (41.4 to 52.0)        | 34.5 (29.0 to 40.1)        | 33.8 (28.2 to 39.2)        | 29.4 (24.1 to 34.6)        | -1.1 (-1.5 to -0.7)                            | -14.8 (-19.7 to -10.5)              |
| <b>Fiji</b>                                   | 40.0 (35.0 to 44.5)        | 24.3 (20.0 to 29.0)        | 22.9 (18.6 to 27.7)        | 19.2 (15.5 to 22.7)        | -1.5 (-1.9 to -1.2)                            | -20.7 (-24.7 to -16.7)              |
| <b>Guam</b>                                   | 19.6 (15.1 to 24.0)        | 14.9 (10.9 to 18.7)        | 14.8 (11.1 to 18.9)        | 14.0 (10.4 to 17.8)        | -0.4 (-0.7 to -0.1)                            | -6.1 (-10.4 to -1.4)                |
| <b>Kiribati</b>                               | 64.0 (59.0 to 68.4)        | 53.5 (47.2 to 59.0)        | 52.1 (46.1 to 57.8)        | 47.8 (41.9 to 53.4)        | -0.7 (-0.9 to -0.6)                            | -10.6 (-13.2 to -8.2)               |
| <b>Marshall Islands</b>                       | 54.0 (48.7 to 58.9)        | 38.1 (32.4 to 43.3)        | 37.0 (31.3 to 42.1)        | 30.3 (25.3 to 35.1)        | -1.5 (-1.8 to -1.2)                            | -20.5 (-24.0 to -17.0)              |
| <b>Northern Mariana Islands</b>               | 19.1 (14.9 to 23.6)        | 16.4 (12.6 to 20.7)        | 16.4 (12.5 to 20.7)        | 15.6 (11.8 to 19.7)        | -0.3 (-0.7 to -0.0)                            | -5.1 (-9.5 to -0.5)                 |
| <b>Papua New Guinea</b>                       | 72.9 (69.1 to 76.1)        | 65.5 (60.7 to 69.8)        | 64.8 (59.9 to 69.8)        | 61.7 (56.8 to 66.0)        | -0.4 (-0.5 to -0.3)                            | -5.8 (-7.3 to -4.4)                 |
| <b>Samoa</b>                                  | 24.7 (19.9 to 29.4)        | 15.6 (12.0 to 19.3)        | 15.2 (11.6 to 18.7)        | 12.3 (9.5 to 15.4)         | -1.6 (-2.0 to -1.2)                            | -20.9 (-25.7 to -16.5)              |
| <b>Solomon Islands</b>                        | 53.5 (47.3 to 59.3)        | 43.2 (37.2 to 49.3)        | 41.9 (35.6 to 48.0)        | 36.6 (30.6 to 42.3)        | -1.1 (-1.4 to -0.8)                            | -15.2 (-18.6 to -11.5)              |
| <b>Tonga</b>                                  | 40.4 (35.1 to 46.1)        | 28.6 (23.5 to 33.9)        | 27.7 (22.7 to 33.2)        | 22.9 (18.5 to 27.8)        | -1.5 (-1.8 to -1.2)                            | -19.9 (-23.6 to -16.5)              |
| <b>Vanuatu</b>                                | 67.3 (62.7 to 70.9)        | 60.3 (55.6 to 64.4)        | 59.7 (54.9 to 63.7)        | 55.6 (50.8 to 59.9)        | -0.5 (-0.6 to -0.4)                            | -7.8 (-9.2 to -6.5)                 |
| <b>Southeast Asia</b>                         |                            |                            |                            |                            |                                                |                                     |
| <b>Cambodia</b>                               | 54.9 (47.5 to 59.9)        | 41.0 (33.5 to 45.9)        | 40.5 (32.6 to 45.5)        | 35.4 (28.5 to 40.1)        | -1.0 (-1.2 to -0.8)                            | -13.7 (-16.1 to -11.6)              |
| <b>Indonesia</b>                              | 36.2 (26.2 to 41.7)        | 36.4 (26.1 to 42.4)        | 35.8 (25.4 to 41.9)        | 33.9 (23.6 to 39.8)        | -0.5 (-0.7 to -0.3)                            | -6.9 (-9.5 to -4.3)                 |
| <b>Laos</b>                                   | 66.4 (62.7 to 70.0)        | 55.1 (50.5 to 59.3)        | 53.7 (49.1 to 58.0)        | 49.5 (45.2 to 53.8)        | -0.7 (-0.9 to -0.5)                            | -10.2 (-12.4 to -7.8)               |
| <b>Malaysia</b>                               | 13.6 (10.2 to 17.6)        | 12.5 (8.8 to 16.2)         | 12.0 (8.3 to 16.2)         | 10.7 (7.4 to 13.9)         | -1.0 (-1.5 to -0.6)                            | -14.5 (-19.9 to -7.9)               |
| <b>Maldives</b>                               | 69.0 (61.9 to 76.3)        | 57.9 (50.8 to 64.1)        | 56.1 (49.3 to 62.5)        | 49.9 (43.1 to 56.4)        | -1.0 (-1.2 to -0.7)                            | -13.9 (-16.9 to -10.5)              |
| <b>Mauritius</b>                              | 3.1 (2.2 to 4.3)           | 2.3 (1.6 to 3.2)           | 2.3 (1.6 to 3.1)           | 2.1 (1.5 to 2.8)           | -0.7 (-1.2 to -0.3)                            | -10.3 (-16.3 to -3.9)               |
| <b>Myanmar</b>                                | 70.3 (66.1 to 73.6)        | 59.9 (54.5 to 64.0)        | 58.8 (53.4 to 63.0)        | 53.6 (48.7 to 58.0)        | -0.7 (-0.9 to -0.6)                            | -10.4 (-12.3 to -8.3)               |
| <b>Philippines</b>                            | 53.5 (48.6 to 57.5)        | 50.5 (44.9 to 55.5)        | 49.0 (43.4 to 54.1)        | 43.1 (37.5 to 48.5)        | -1.1 (-1.4 to -0.7)                            | -14.8 (-18.7 to -10.1)              |
| <b>Sri Lanka</b>                              | 49.8 (45.0 to 54.1)        | 34.9 (28.9 to 39.9)        | 33.3 (27.1 to 38.5)        | 26.0 (21.4 to 30.5)        | -1.9 (-2.3 to -1.6)                            | -25.2 (-29.0 to -21.5)              |
| <b>Seychelles</b>                             | 33.2 (27.7 to 38.9)        | 31.4 (25.4 to 37.0)        | 29.9 (24.3 to 35.3)        | 27.1 (21.9 to 32.1)        | -1.0 (-1.3 to -0.6)                            | -13.7 (-18.1 to -8.0)               |
| <b>Thailand</b>                               | 64.6 (60.4 to 68.3)        | 54.1 (49.2 to 58.2)        | 52.7 (47.8 to 56.9)        | 49.5 (44.8 to 53.8)        | -0.6 (-0.8 to -0.4)                            | -8.6 (-11.0 to -6.4)                |

|                                                                                                                                                                                   | Estimate in 2000 (95% UIs) | Estimate in 2015 (95% UIs) | Estimate in 2017 (95% UIs) | Estimate in 2020 (95% UIs) | Annualised rate of change, 2015-2020 (95% UIs) | Percent change, 2015-2020 (95% UIs) |
|-----------------------------------------------------------------------------------------------------------------------------------------------------------------------------------|----------------------------|----------------------------|----------------------------|----------------------------|------------------------------------------------|-------------------------------------|
| Timor-Leste                                                                                                                                                                       | 54.4 (49.6 to 58.9)        | 46.4 (40.7 to 51.2)        | 46.3 (40.4 to 51.3)        | 39.8 (34.4 to 44.9)        | -1.0 (-1.4 to -0.0)                            | -14.2 (-18.4 to -0.6)               |
| Vietnam                                                                                                                                                                           | 44.8 (37.8 to 49.9)        | 35.4 (26.7 to 40.0)        | 34.3 (25.7 to 39.4)        | 32.0 (24.9 to 36.9)        | -0.7 (-0.8 to -0.3)                            | -9.6 (-11.8 to -4.3)                |
| <b>Sub-Saharan Africa</b>                                                                                                                                                         |                            |                            |                            |                            |                                                |                                     |
| <b>Central Sub-Saharan Africa</b>                                                                                                                                                 |                            |                            |                            |                            |                                                |                                     |
| Angola                                                                                                                                                                            | 86.1 (81.4 to 91.4)        | 78.9 (72.6 to 86.4)        | 77.2 (70.0 to 84.8)        | 73.6 (65.7 to 82.0)        | -0.5 (-0.7 to -0.3)                            | -6.8 (-9.4 to -4.3)                 |
| Central African Republic                                                                                                                                                          | 88.6 (82.1 to 97.1)        | 86.2 (78.5 to 96.1)        | 86.2 (78.0 to 96.1)        | 85.8 (78.0 to 96.0)        | -0.0 (-0.1 to -0.0)                            | -0.6 (-1.2 to -0.1)                 |
| Congo                                                                                                                                                                             | 73.3 (65.5 to 81.9)        | 61.6 (52.9 to 71.4)        | 59.6 (50.6 to 69.2)        | 54.9 (45.9 to 64.8)        | -0.8 (-1.1 to -0.5)                            | -11.0 (-15.2 to -7.2)               |
| Democratic Republic of the Congo                                                                                                                                                  | 80.5 (72.2 to 91.2)        | 78.4 (69.6 to 90.8)        | 77.1 (68.0 to 89.4)        | 75.9 (66.5 to 88.7)        | -0.2 (-0.3 to -0.1)                            | -3.2 (-4.9 to -1.8)                 |
| Equatorial Guinea                                                                                                                                                                 | 82.2 (74.8 to 90.8)        | 55.4 (46.0 to 65.2)        | 53.1 (43.9 to 63.0)        | 45.3 (36.4 to 55.5)        | -1.4 (-1.7 to -1.0)                            | -18.3 (-23.0 to -14.0)              |
| Gabon                                                                                                                                                                             | 56.6 (48.1 to 66.3)        | 36.6 (29.2 to 45.4)        | 34.5 (27.1 to 43.3)        | 28.1 (21.7 to 36.2)        | -1.8 (-2.3 to -1.3)                            | -23.3 (-29.1 to -18.0)              |
| <b>Eastern Sub-Saharan Africa</b>                                                                                                                                                 |                            |                            |                            |                            |                                                |                                     |
| Burundi                                                                                                                                                                           | 84.7 (78.5 to 91.3)        | 81.6 (74.4 to 89.7)        | 81.5 (74.4 to 89.7)        | 80.9 (73.7 to 89.3)        | -0.1 (-0.1 to -0.0)                            | -0.8 (-1.6 to -0.1)                 |
| Comoros                                                                                                                                                                           | 71.1 (64.9 to 76.7)        | 59.4 (53.0 to 65.2)        | 58.6 (52.2 to 64.3)        | 52.6 (45.9 to 58.8)        | -0.8 (-1.1 to -0.6)                            | -11.5 (-14.7 to -8.7)               |
| Djibouti                                                                                                                                                                          | 73.5 (66.3 to 81.7)        | 63.8 (56.0 to 73.7)        | 62.4 (54.5 to 72.3)        | 59.4 (51.0 to 69.8)        | -0.5 (-0.7 to -0.3)                            | -6.9 (-10.6 to -4.1)                |
| Eritrea                                                                                                                                                                           | 74.9 (70.1 to 79.5)        | 70.1 (64.5 to 75.2)        | 69.1 (63.3 to 74.1)        | 65.9 (59.9 to 71.3)        | -0.4 (-0.5 to -0.3)                            | -6.1 (-7.9 to -4.6)                 |
| Ethiopia                                                                                                                                                                          | 83.1 (78.6 to 87.8)        | 71.4 (65.0 to 78.4)        | 69.5 (63.1 to 76.9)        | 67.7 (60.9 to 75.5)        | -0.3 (-0.5 to -0.2)                            | -5.1 (-7.4 to -2.9)                 |
| Kenya                                                                                                                                                                             | 69.0 (64.9 to 73.0)        | 62.7 (58.2 to 66.8)        | 61.6 (56.8 to 65.8)        | 58.5 (53.6 to 62.9)        | -0.5 (-0.6 to -0.4)                            | -6.7 (-8.1 to -5.5)                 |
| Madagascar                                                                                                                                                                        | 76.4 (73.1 to 79.2)        | 75.4 (71.7 to 78.4)        | 74.8 (71.0 to 78.0)        | 74.3 (70.5 to 77.5)        | -0.1 (-0.2 to -0.0)                            | -1.4 (-2.3 to -0.6)                 |
| Malawi                                                                                                                                                                            | 80.0 (75.0 to 85.0)        | 73.0 (66.1 to 79.0)        | 72.3 (65.4 to 79.0)        | 69.5 (62.4 to 76.7)        | -0.3 (-0.4 to -0.2)                            | -4.7 (-6.2 to -3.4)                 |
| Mozambique                                                                                                                                                                        | 85.6 (81.4 to 90.0)        | 76.1 (70.7 to 81.5)        | 74.8 (68.7 to 80.4)        | 72.7 (66.6 to 78.6)        | -0.3 (-0.4 to -0.2)                            | -4.5 (-6.3 to -3.0)                 |
| Rwanda                                                                                                                                                                            | 71.9 (67.5 to 75.2)        | 62.5 (56.9 to 66.4)        | 61.6 (56.8 to 65.5)        | 55.4 (50.5 to 59.4)        | -0.8 (-0.9 to -0.7)                            | -11.3 (-13.1 to -9.8)               |
| Somalia                                                                                                                                                                           | 83.5 (78.9 to 87.8)        | 75.3 (69.7 to 81.3)        | 75.2 (69.3 to 81.4)        | 72.3 (65.8 to 79.1)        | -0.3 (-0.4 to -0.1)                            | -4.0 (-6.1 to -2.0)                 |
| South Sudan                                                                                                                                                                       | 88.5 (84.8 to 92.2)        | 86.2 (81.4 to 91.0)        | 85.7 (81.0 to 90.6)        | 85.3 (80.5 to 90.3)        | -0.1 (-0.1 to -0.0)                            | -1.0 (-1.7 to -0.4)                 |
| Tanzania                                                                                                                                                                          | 72.1 (68.3 to 75.7)        | 64.4 (59.8 to 68.6)        | 63.2 (58.4 to 67.5)        | 61.5 (56.6 to 66.0)        | -0.3 (-0.5 to -0.2)                            | -4.5 (-7.0 to -2.4)                 |
| Uganda                                                                                                                                                                            | 74.5 (70.9 to 77.7)        | 63.9 (59.3 to 67.0)        | 63.1 (58.5 to 66.8)        | 60.4 (55.9 to 64.3)        | -0.4 (-0.5 to -0.3)                            | -5.4 (-6.7 to -4.2)                 |
| Zambia                                                                                                                                                                            | 66.8 (62.6 to 70.2)        | 63.2 (58.4 to 67.6)        | 61.4 (56.6 to 65.5)        | 58.6 (53.7 to 62.8)        | -0.5 (-0.7 to -0.3)                            | -7.3 (-9.5 to -5.0)                 |
| <b>Southern Sub-Saharan Africa</b>                                                                                                                                                |                            |                            |                            |                            |                                                |                                     |
| Botswana                                                                                                                                                                          | 63.7 (56.0 to 71.8)        | 35.5 (29.2 to 42.1)        | 34.1 (27.6 to 41.1)        | 28.6 (22.7 to 35.1)        | -1.5 (-1.8 to -1.1)                            | -19.5 (-23.6 to -15.4)              |
| Lesotho                                                                                                                                                                           | 79.7 (72.2 to 88.9)        | 73.5 (65.4 to 82.9)        | 72.5 (64.2 to 81.8)        | 68.2 (59.3 to 78.4)        | -0.5 (-0.7 to -0.3)                            | -7.3 (-9.7 to -5.0)                 |
| Namibia                                                                                                                                                                           | 62.8 (54.5 to 71.2)        | 48.2 (40.5 to 54.5)        | 46.1 (38.4 to 54.5)        | 38.8 (31.3 to 46.9)        | -1.5 (-1.9 to -1.1)                            | -19.9 (-24.2 to -15.4)              |
| South Africa                                                                                                                                                                      | 32.0 (27.6 to 37.0)        | 28.8 (24.5 to 33.2)        | 28.0 (23.5 to 32.8)        | 24.0 (20.0 to 28.5)        | -1.2 (-1.6 to -0.8)                            | -16.6 (-21.3 to -11.7)              |
| Swaziland                                                                                                                                                                         | 72.7 (65.4 to 81.0)        | 60.5 (52.4 to 69.1)        | 58.9 (51.1 to 67.8)        | 51.9 (43.8 to 61.3)        | -1.0 (-1.3 to -0.7)                            | -14.3 (-17.7 to -10.3)              |
| Zimbabwe                                                                                                                                                                          | 62.4 (55.2 to 69.9)        | 68.1 (60.3 to 75.9)        | 66.6 (58.5 to 74.5)        | 65.0 (56.9 to 73.0)        | -0.3 (-0.5 to -0.2)                            | -4.6 (-7.0 to -2.6)                 |
| <b>Western Sub-Saharan Africa</b>                                                                                                                                                 |                            |                            |                            |                            |                                                |                                     |
| Benin                                                                                                                                                                             | 77.5 (70.7 to 85.7)        | 68.3 (60.0 to 77.7)        | 67.0 (58.8 to 76.7)        | 65.0 (57.3 to 75.7)        | -0.2 (-0.4 to -0.1)                            | -3.6 (-6.4 to -1.2)                 |
| Burkina Faso                                                                                                                                                                      | 87.4 (80.9 to 95.9)        | 82.3 (74.6 to 92.6)        | 81.8 (74.0 to 92.1)        | 80.1 (71.8 to 91.2)        | -0.2 (-0.3 to -0.1)                            | -2.8 (-4.3 to -1.3)                 |
| Cameroon                                                                                                                                                                          | 79.5 (73.6 to 86.5)        | 70.5 (62.5 to 79.9)        | 68.5 (60.4 to 77.7)        | 65.8 (57.4 to 75.5)        | -0.5 (-0.6 to -0.3)                            | -6.7 (-9.3 to -4.4)                 |
| Cape Verde                                                                                                                                                                        | 66.3 (58.1 to 74.6)        | 45.0 (36.4 to 53.8)        | 43.8 (35.1 to 52.3)        | 35.9 (27.8 to 44.3)        | -1.5 (-2.0 to -1.1)                            | -20.4 (-25.9 to -15.3)              |
| Chad                                                                                                                                                                              | 88.6 (83.5 to 94.6)        | 84.0 (78.0 to 91.2)        | 83.4 (77.2 to 91.2)        | 82.6 (77.2 to 90.7)        | -0.1 (-0.2 to -0.1)                            | -1.7 (-2.8 to -0.8)                 |
| Cote d'Ivoire                                                                                                                                                                     | 69.4 (62.3 to 77.6)        | 67.1 (58.5 to 76.8)        | 65.6 (57.0 to 75.5)        | 61.2 (52.4 to 71.7)        | -0.6 (-0.9 to -0.4)                            | -8.9 (-12.5 to -5.9)                |
| The Gambia                                                                                                                                                                        | 75.6 (67.5 to 85.6)        | 65.4 (57.0 to 74.8)        | 64.6 (56.1 to 69.8)        | 59.6 (50.7 to 69.8)        | -0.6 (-0.9 to -0.7)                            | -8.8 (-12.2 to -5.5)                |
| Ghana                                                                                                                                                                             | 78.8 (72.5 to 87.4)        | 76.3 (68.0 to 86.8)        | 75.0 (67.4 to 85.7)        | 72.0 (66.8 to 85.3)        | -0.1 (-0.2 to -0.0)                            | -1.8 (-3.1 to -0.7)                 |
| Guinea                                                                                                                                                                            | 87.1 (82.9 to 91.7)        | 79.8 (73.3 to 87.4)        | 78.7 (72.1 to 86.5)        | 76.2 (68.9 to 84.8)        | -0.3 (-0.5 to -0.2)                            | -4.5 (-6.6 to -2.6)                 |
| Guinea-Bissau                                                                                                                                                                     | 83.8 (78.3 to 90.1)        | 80.3 (73.3 to 88.5)        | 79.5 (72.5 to 87.7)        | 78.2 (71.0 to 86.8)        | -0.2 (-0.3 to -0.1)                            | -2.7 (-4.3 to -1.5)                 |
| Liberia                                                                                                                                                                           | 87.3 (82.0 to 94.0)        | 83.8 (77.1 to 92.7)        | 83.3 (76.3 to 92.2)        | 82.9 (75.8 to 91.9)        | -0.1 (-0.1 to -0.0)                            | -1.0 (-1.9 to -0.3)                 |
| Mali                                                                                                                                                                              | 84.6 (79.5 to 90.6)        | 76.6 (70.1 to 83.7)        | 75.7 (69.2 to 82.8)        | 74.6 (67.2 to 82.2)        | -0.2 (-0.3 to -0.1)                            | -2.6 (-4.4 to -1.2)                 |
| Mauritania                                                                                                                                                                        | 73.7 (67.4 to 80.3)        | 65.6 (57.4 to 73.2)        | 64.0 (56.0 to 72.1)        | 57.6 (49.4 to 66.2)        | -0.9 (-1.2 to -0.6)                            | -12.3 (-16.0 to -8.6)               |
| Niger                                                                                                                                                                             | 86.9 (81.6 to 93.1)        | 80.7 (73.7 to 88.5)        | 80.0 (72.9 to 88.0)        | 74.9 (67.2 to 84.3)        | -0.5 (-0.7 to -0.3)                            | -7.2 (-10.5 to -3.9)                |
| Nigeria                                                                                                                                                                           | 81.5 (77.0 to 85.8)        | 76.0 (69.3 to 83.1)        | 75.6 (68.8 to 82.6)        | 74.2 (67.3 to 81.5)        | -0.2 (-0.2 to -0.1)                            | -2.3 (-3.5 to -1.2)                 |
| Sao Tome and Principe                                                                                                                                                             | 73.4 (65.7 to 82.8)        | 47.3 (39.5 to 56.1)        | 45.4 (37.1 to 54.0)        | 42.5 (34.1 to 51.2)        | -0.7 (-1.1 to -0.4)                            | -10.3 (-15.0 to -5.9)               |
| Senegal                                                                                                                                                                           | 60.0 (54.7 to 65.5)        | 49.3 (42.9 to 55.9)        | 48.9 (41.7 to 56.5)        | 43.4 (36.5 to 51.2)        | -0.9 (-1.3 to -0.5)                            | -12.1 (-17.2 to -7.1)               |
| Sierra Leone                                                                                                                                                                      | 87.0 (82.4 to 92.9)        | 81.6 (75.1 to 89.3)        | 80.8 (74.2 to 88.6)        | 79.8 (73.1 to 87.9)        | -0.1 (-0.2 to -0.1)                            | -2.2 (-3.5 to -1.2)                 |
| Togo                                                                                                                                                                              | 82.9 (76.4 to 90.0)        | 78.9 (71.4 to 87.8)        | 77.8 (70.2 to 87.1)        | 76.9 (69.2 to 86.4)        | -0.2 (-0.3 to -0.1)                            | -2.5 (-4.0 to -1.3)                 |
| <b>Indicator 6.2.1a: Risk-weighted prevalence of populations using unsafe or unimproved sanitation, as measured by the summary exposure value (SEV) for unsafe sanitation (%)</b> |                            |                            |                            |                            |                                                |                                     |
| <b>Central Europe, Eastern Europe, and Central Asia</b>                                                                                                                           |                            |                            |                            |                            |                                                |                                     |
| <b>Central Asia</b>                                                                                                                                                               |                            |                            |                            |                            |                                                |                                     |
| Armenia                                                                                                                                                                           | 33.3 (26.6 to 42.5)        | 22.6 (17.1 to 30.2)        | 22.6 (16.7 to 30.9)        | 17.1 (12.4 to 23.8)        | -1.9 (-2.5 to -1.3)                            | -24.7 (-31.7 to -17.2)              |
| Azerbaijan                                                                                                                                                                        | 59.9 (46.1 to 79.3)        | 39.2 (28.0 to 53.0)        | 37.6 (26.4 to 51.1)        | 26.9 (17.3 to 38.9)        | -2.6 (-3.6 to -1.7)                            | -31.6 (-42.1 to -22.3)              |
| Georgia                                                                                                                                                                           | 50.3 (38.2 to 64.0)        | 37.0 (25.9 to 50.0)        | 34.5 (23.5 to 48.0)        | 30.5 (20.2 to 43.3)        | -1.3 (-2.0 to -0.7)                            | -17.8 (-25.4 to -10.4)              |
| Kazakhstan                                                                                                                                                                        | 44.0 (37.3 to 53.2)        | 42.5 (37.6 to 48.3)        | 37.6 (32.3 to 43.9)        | 29.3 (24.6 to 35.2)        | -2.5 (-3.1 to -2.0)                            | -31.1 (-37.2 to -25.5)              |
| Kyrgyzstan                                                                                                                                                                        | 64.1 (49.2 to 86.0)        | 75.6 (66.4 to 86.9)        | 74.2 (64.9 to 85.7)        | 70.1 (59.9 to 83.1)        | -0.5 (-0.8 to -0.2)                            | -7.3 (-11.6 to -3.4)                |
| Mongolia                                                                                                                                                                          | 76.1 (66.7 to 88.5)        | 69.4 (60.4 to 80.3)        | 68.0 (58.5 to 78.8)        | 59.1 (48.9 to 71.7)        | -1.1 (-1.5 to -0.7)                            | -15.0 (-20.7 to -9.3)               |
| Tajikistan                                                                                                                                                                        | 63.2 (43.9 to 91.6)        | 63.4 (41.9 to 96.7)        | 63.0 (42.1 to 96.7)        | 60.7 (39.1 to 96.2)        | -0.3 (-0.6 to -0.0)                            | -4.6 (-8.4 to -0.2)                 |
| Turkmenistan                                                                                                                                                                      | 58.8 (40.6 to 84.7)        | 46.0 (28.4 to 71.0)        | 44.0 (26.4 to 71.0)        | 29.0 (15.2 to 55.8)        | -3.2 (-4.2 to -1.9)                            | -38.3 (-46.7 to -25.2)              |
| Uzbekistan                                                                                                                                                                        | 69.5 (55.4 to 91.3)        | 60.9 (45.4 to 81.8)        | 58.3 (43.0 to 79.3)        | 46.0 (30.7 to 69.6)        | -1.9 (-2.7 to -1.1)                            | -25.1 (-33.0 to -15.0)              |
| <b>Central Europe</b>                                                                                                                                                             |                            |                            |                            |                            |                                                |                                     |
| Albania                                                                                                                                                                           | 28.2 (21.6 to 36.9)        | 15.3 (10.3 to 22.1)        | 13.7 (9.0 to 20.4)         | 7.4 (4.7 to 11.4)          | -4.9 (-5.7 to -4.0)                            | -51.7 (-57.4 to -45.3)              |
| Bosnia and Herzegovina                                                                                                                                                            | 17.1 (13.1 to 23.0)        | 6.6 (4.2 to 10.3)          | 6.2 (3.8 to 9.7)           | 3.4 (2.1 to 5.5)           | -4.5 (-5.6 to -3.4)                            | -48.6 (-56.8 to -40.3)              |
| Bulgaria                                                                                                                                                                          | 2.1 (1.1 to 3.5)           | 1.4 (0.8 to 2.4)           | 1.4 (0.7 to 2.3)           | 1.3 (0.7 to 2.1)           | -1.0 (-1.8 to -0.2)                            | -13.4 (-23.5 to -2.2)               |
| Croatia                                                                                                                                                                           | 4.7 (2.7 to 7.7)           | 2.5 (1.4 to 4.5)           | 2.4 (1.4 to 4.2)           | 2.2 (1.3 to 3.9)           | -0.8 (-1.7 to 0.0)                             | -4.8 (-11.4 to 0.4)                 |
| Czech Republic                                                                                                                                                                    | 1.0 (0.5 to 1.6)           | 0.7 (0.4 to 1.2)           | 0.7 (0.4 to 1.2)           | 0.6 (0.3 to 1.1)           | -0.7 (-1.5 to 0.1)                             | -9.5 (-20.1 to 2.2)                 |
| Hungary                                                                                                                                                                           | 11.5 (6.6 to 18.2)         | 6.0 (3.1 to 10.2)          | 5.7 (3.1 to 9.6)           | 4.5 (2.4 to 7.7)           | -2.0 (-3.1 to -1.0)                            | -26.1 (-37.5 to -14.4)              |
| Macedonia                                                                                                                                                                         | 13.3 (7.8 to 20.2)         | 7.4 (4.4 to 11.8)          | 6.9 (4.0 to 11.8)          | 5.8 (3.3 to 9.5)           | -1.6 (-2.6 to -0.8)                            | -21.7 (-32.4 to -11.0)              |
| Montenegro                                                                                                                                                                        | 8.1 (4.5 to 13.7)          | 3.7 (2.1 to 6.5)           | 3.5 (1.9 to 6.1)           | 2.2 (1.2 to 4.0)           | -3.5 (-4.7 to -2.4)                            | -40.8 (-50.9 to -29.9)              |
| Poland                                                                                                                                                                            | 5.5 (3.1 to 8.6)           | 2.4 (1.3 to 4.0)           | 2.2 (1.2 to 3.7)           | 1.7 (1.0 to 3.0)           | -2.0 (-2.9 to -1.2)                            | -26.0 (-34.9 to -15.9)              |
| Romania                                                                                                                                                                           | 36.4 (24.9 to 50.8)        | 17.9 (10.6 to 28.8)        | 16.8 (9.7 to 27.2)         | 8.1 (4.5 to 14.0)          | -5.3 (-6.2 to -4.4)                            | -55.0 (-60.4 to -48.4)              |
| Serbia                                                                                                                                                                            | 12.4 (8.0 to 19.0)         | 5.4 (3.2 to 8.4)           | 5.2 (3.0 to 8.3)           | 3.7 (2.1 to 6.0)           | -2.6 (-4.0 to -1.4)                            | -31.9 (-45.5 to -18.7)              |
| Slovakia                                                                                                                                                                          | 3.3 (1.9 to 5.5)           | 1.8 (1.0 to 3.0)           | 1.7 (0.9 to 2.8)           | 1.6 (0.8 to 2.6)           | -0.8 (-1.6 to 0.0)                             | -10.9 (-21.5 to 0.6)                |
| Slovenia                                                                                                                                                                          | 4.4 (2.5 to 7.0)           | 2.5 (1.4 to 4.1)           | 2.4 (1.3 to 3.9)           | 2.2 (1.2 to 3.6)           | -0.8 (-1.6 to 0.1)                             | -11.2 (-21.8 to 1.6)                |
| <b>Eastern Europe</b>                                                                                                                                                             |                            |                            |                            |                            |                                                |                                     |

|                                    | Estimate in 2000 (95% UIs) | Estimate in 2015 (95% UIs) | Estimate in 2017 (95% UIs) | Estimate in 2020 (95% UIs) | Annualised rate of change, 2015-2020 (95% UIs) | Percent change, 2015-2020 (95% UIs) |
|------------------------------------|----------------------------|----------------------------|----------------------------|----------------------------|------------------------------------------------|-------------------------------------|
| Belarus                            | 30.4 (24.3 to 38.7)        | 17.4 (13.2 to 23.0)        | 16.4 (11.8 to 22.7)        | 13.8 (9.7 to 19.6)         | -1.6 (-2.6 to -0.7)                            | -20.6 (-32.0 to -9.8)               |
| Estonia                            | 13.6 (8.1 to 20.9)         | 7.1 (4.1 to 11.2)          | 6.9 (4.0 to 10.7)          | 6.4 (3.7 to 10.0)          | -0.7 (-1.5 to 0.1)                             | -9.8 (-19.6 to 1.0)                 |
| Latvia                             | 21.3 (13.8 to 30.7)        | 12.0 (7.5 to 18.1)         | 11.4 (6.8 to 17.2)         | 10.6 (6.3 to 16.1)         | -0.9 (-1.6 to -0.1)                            | -12.5 (-21.4 to -1.4)               |
| Lithuania                          | 21.6 (13.7 to 31.9)        | 12.3 (7.3 to 18.7)         | 12.0 (7.3 to 18.9)         | 10.7 (6.5 to 17.0)         | -1.0 (-1.7 to -0.2)                            | -13.1 (-23.0 to -3.1)               |
| Moldova                            | 66.6 (58.2 to 76.5)        | 58.3 (52.2 to 65.6)        | 55.9 (48.1 to 64.0)        | 45.0 (37.6 to 53.3)        | -1.8 (-2.3 to -1.3)                            | -23.1 (-29.5 to -17.3)              |
| Russia                             | 35.9 (27.7 to 46.6)        | 21.8 (15.1 to 30.4)        | 20.8 (14.2 to 29.8)        | 16.6 (11.2 to 24.4)        | -1.8 (-2.6 to -1.2)                            | -23.9 (-31.8 to -16.1)              |
| Ukraine                            | 31.0 (22.4 to 42.8)        | 31.6 (23.0 to 43.0)        | 30.7 (21.7 to 43.2)        | 25.5 (17.6 to 36.7)        | -1.5 (-2.1 to -0.8)                            | -19.7 (-27.5 to -11.8)              |
| <b>High-income</b>                 |                            |                            |                            |                            |                                                |                                     |
| <b>Australasia</b>                 |                            |                            |                            |                            |                                                |                                     |
| Australia                          | 2.4 (1.4 to 3.9)           | 1.5 (0.8 to 2.4)           | 1.4 (0.8 to 2.3)           | 0.9 (0.5 to 1.4)           | -3.5 (-4.3 to -2.7)                            | -41.0 (-47.8 to -32.9)              |
| New Zealand                        | 3.2 (1.9 to 4.9)           | 2.1 (1.2 to 3.3)           | 2.0 (1.1 to 3.2)           | 1.3 (0.7 to 2.0)           | -3.2 (-4.1 to -2.3)                            | -38.3 (-45.8 to -29.5)              |
| <b>High-income Asia Pacific</b>    |                            |                            |                            |                            |                                                |                                     |
| Bhunei                             | 3.5 (2.1 to 5.6)           | 1.8 (1.0 to 2.9)           | 1.7 (0.9 to 2.7)           | 1.1 (0.6 to 1.8)           | -3.3 (-4.5 to -2.2)                            | -39.0 (-49.4 to -28.3)              |
| Japan                              | 2.1 (1.3 to 3.4)           | 1.6 (0.9 to 2.5)           | 1.5 (0.9 to 2.5)           | 1.1 (0.7 to 1.9)           | -2.2 (-3.1 to -1.3)                            | -27.8 (-37.5 to -17.4)              |
| South Korea                        | 3.1 (1.8 to 4.9)           | 1.5 (0.9 to 2.3)           | 1.4 (0.8 to 2.3)           | 0.8 (0.5 to 1.4)           | -3.9 (-4.9 to -3.0)                            | -44.3 (-52.1 to -36.3)              |
| Singapore                          | 3.2 (1.8 to 4.9)           | 1.5 (0.9 to 2.4)           | 1.4 (0.8 to 2.3)           | 0.8 (0.5 to 1.4)           | -4.0 (-5.2 to -2.9)                            | -44.8 (-53.9 to -35.5)              |
| <b>High-income North America</b>   |                            |                            |                            |                            |                                                |                                     |
| Canada                             | 3.3 (1.9 to 5.2)           | 1.9 (1.1 to 3.2)           | 1.9 (1.1 to 3.2)           | 1.6 (0.9 to 2.6)           | -1.6 (-2.4 to -0.7)                            | -20.7 (-30.3 to -9.4)               |
| Greenland                          | 12.7 (7.6 to 18.5)         | 6.3 (3.8 to 10.2)          | 6.3 (3.6 to 10.1)          | 4.3 (2.5 to 7.2)           | -2.7 (-3.6 to -1.8)                            | -32.8 (-42.0 to -23.1)              |
| United States                      | 5.2 (3.2 to 8.2)           | 3.1 (1.7 to 5.0)           | 3.0 (1.6 to 5.0)           | 2.5 (1.4 to 4.2)           | -1.5 (-2.4 to -0.7)                            | -20.4 (-29.9 to -9.5)               |
| <b>Southern Latin America</b>      |                            |                            |                            |                            |                                                |                                     |
| Argentina                          | 19.2 (15.5 to 23.3)        | 5.8 (3.6 to 8.7)           | 5.3 (3.3 to 8.1)           | 2.5 (1.5 to 3.9)           | -5.7 (-6.8 to -4.7)                            | -57.1 (-64.0 to -50.4)              |
| Chile                              | 17.2 (13.4 to 21.4)        | 8.0 (4.9 to 11.8)          | 7.6 (4.7 to 11.7)          | 3.9 (2.3 to 6.0)           | -4.8 (-5.7 to -3.9)                            | -51.1 (-57.3 to -44.1)              |
| Uruguay                            | 10.2 (7.9 to 12.9)         | 2.5 (1.5 to 3.7)           | 2.1 (1.3 to 3.2)           | 0.9 (0.5 to 1.4)           | -6.9 (-8.0 to -6.0)                            | -64.5 (-69.7 to -59.0)              |
| <b>Western Europe</b>              |                            |                            |                            |                            |                                                |                                     |
| Andorra                            | 1.1 (0.7 to 1.9)           | 0.8 (0.5 to 1.2)           | 0.8 (0.5 to 1.2)           | 0.6 (0.3 to 0.9)           | -1.9 (-2.8 to -1.0)                            | -24.6 (-34.1 to -14.3)              |
| Austria                            | 4.9 (3.0 to 7.6)           | 3.2 (1.9 to 5.2)           | 3.1 (1.8 to 5.0)           | 2.3 (1.3 to 3.7)           | -2.3 (-3.1 to -1.4)                            | -28.8 (-37.4 to -19.5)              |
| Belgium                            | 1.6 (1.0 to 2.4)           | 0.9 (0.6 to 1.5)           | 0.9 (0.5 to 1.4)           | 0.7 (0.4 to 1.1)           | -2.0 (-2.9 to -1.0)                            | -25.3 (-35.6 to -14.3)              |
| Cyprus                             | 2.5 (1.4 to 3.8)           | 1.1 (0.7 to 1.8)           | 1.1 (0.7 to 1.8)           | 0.8 (0.5 to 1.3)           | -2.1 (-3.4 to -1.0)                            | -26.5 (-39.7 to -13.4)              |
| Denmark                            | 1.0 (0.6 to 1.6)           | 0.7 (0.4 to 1.1)           | 0.7 (0.4 to 1.0)           | 0.5 (0.3 to 0.8)           | -1.8 (-2.8 to -0.8)                            | -23.8 (-34.5 to -11.3)              |
| Finland                            | 1.5 (0.9 to 2.4)           | 0.9 (0.5 to 1.4)           | 0.8 (0.5 to 1.4)           | 0.6 (0.4 to 1.0)           | -2.2 (-3.5 to -1.2)                            | -28.4 (-39.2 to -17.1)              |
| France                             | 2.0 (1.2 to 3.2)           | 1.2 (0.7 to 1.9)           | 1.1 (0.7 to 1.8)           | 0.9 (0.5 to 1.4)           | -1.9 (-3.0 to -0.9)                            | -24.9 (-35.8 to -13.2)              |
| Germany                            | 1.9 (1.2 to 3.1)           | 1.1 (0.7 to 1.7)           | 1.1 (0.6 to 1.7)           | 0.8 (0.5 to 1.2)           | -2.5 (-3.4 to -1.6)                            | -31.0 (-40.1 to -21.9)              |
| Greece                             | 2.8 (1.7 to 4.4)           | 1.8 (1.1 to 2.8)           | 1.8 (1.1 to 2.9)           | 1.5 (0.9 to 2.4)           | -1.2 (-2.7 to -0.1)                            | -16.3 (-33.6 to -1.2)               |
| Iceland                            | 1.4 (0.8 to 2.2)           | 0.8 (0.4 to 1.2)           | 0.7 (0.4 to 1.1)           | 0.5 (0.3 to 0.7)           | -3.2 (-4.1 to -2.2)                            | -37.9 (-46.2 to -28.4)              |
| Ireland                            | 4.1 (2.4 to 6.6)           | 2.1 (1.2 to 3.4)           | 2.0 (1.2 to 3.1)           | 1.3 (0.8 to 2.1)           | -3.2 (-4.1 to -2.3)                            | -37.7 (-46.3 to -28.9)              |
| Israel                             | 2.8 (1.6 to 4.5)           | 1.9 (1.1 to 3.0)           | 1.8 (1.0 to 2.9)           | 1.3 (0.8 to 2.1)           | -2.2 (-3.0 to -1.3)                            | -27.5 (-36.5 to -18.0)              |
| Italy                              | 2.2 (1.4 to 3.5)           | 1.6 (1.0 to 2.5)           | 1.6 (1.0 to 2.5)           | 1.3 (0.8 to 2.0)           | -1.6 (-2.5 to -0.7)                            | -21.2 (-31.2 to -9.6)               |
| Luxembourg                         | 1.1 (0.6 to 1.7)           | 0.7 (0.4 to 1.1)           | 0.7 (0.4 to 1.1)           | 0.5 (0.3 to 0.9)           | -1.9 (-2.9 to -0.9)                            | -24.5 (-35.4 to -13.3)              |
| Malta                              | 2.9 (1.8 to 4.6)           | 1.6 (0.9 to 2.5)           | 1.5 (0.9 to 2.4)           | 1.0 (0.6 to 1.6)           | -3.1 (-4.0 to -2.2)                            | -36.6 (-44.8 to -27.9)              |
| Netherlands                        | 1.2 (0.7 to 1.9)           | 0.7 (0.4 to 1.2)           | 0.7 (0.4 to 1.1)           | 0.5 (0.3 to 0.8)           | -2.1 (-3.2 to -1.1)                            | -26.4 (-37.8 to -14.6)              |
| Norway                             | 1.3 (0.8 to 2.0)           | 0.7 (0.4 to 1.1)           | 0.7 (0.4 to 1.1)           | 0.5 (0.3 to 0.8)           | -2.2 (-3.3 to -1.3)                            | -28.4 (-39.5 to -17.3)              |
| Portugal                           | 10.6 (7.4 to 14.4)         | 5.8 (3.5 to 8.8)           | 5.6 (3.4 to 8.6)           | 3.8 (2.2 to 5.9)           | -2.9 (-3.8 to -2.0)                            | -35.3 (-43.5 to -26.5)              |
| Spain                              | 1.5 (0.9 to 2.4)           | 0.6 (0.3 to 0.9)           | 0.5 (0.3 to 0.9)           | 0.3 (0.2 to 0.5)           | -4.1 (-5.2 to -3.0)                            | -45.4 (-54.0 to -36.2)              |
| Sweden                             | 1.6 (0.9 to 2.4)           | 1.0 (0.6 to 1.6)           | 0.9 (0.6 to 1.5)           | 0.7 (0.5 to 1.2)           | -1.9 (-2.7 to -1.0)                            | -24.3 (-33.6 to -13.4)              |
| Switzerland                        | 1.3 (0.8 to 2.1)           | 0.9 (0.5 to 1.4)           | 0.9 (0.5 to 1.4)           | 0.6 (0.4 to 1.0)           | -2.5 (-3.4 to -1.6)                            | -30.7 (-39.9 to -21.2)              |
| United Kingdom                     | 0.4 (0.2 to 0.6)           | 0.2 (0.1 to 0.4)           | 0.2 (0.1 to 0.3)           | 0.2 (0.1 to 0.2)           | -2.6 (-3.5 to -1.7)                            | -31.7 (-40.5 to -22.3)              |
| <b>Latin America and Caribbean</b> |                            |                            |                            |                            |                                                |                                     |
| <b>Andean Latin America</b>        |                            |                            |                            |                            |                                                |                                     |
| Bolivia                            | 38.3 (31.1 to 47.9)        | 19.2 (12.8 to 27.6)        | 16.6 (10.8 to 24.5)        | 8.2 (5.1 to 12.6)          | -5.8 (-6.6 to -4.9)                            | -57.8 (-63.0 to -52.1)              |
| Ecuador                            | 27.1 (22.4 to 33.2)        | 12.9 (9.2 to 18.1)         | 12.0 (8.1 to 17.2)         | 11.1 (7.5 to 16.0)         | -1.0 (-1.8 to -0.3)                            | -14.3 (-23.8 to -4.6)               |
| Peru                               | 42.0 (35.7 to 51.0)        | 35.0 (26.9 to 46.3)        | 32.7 (24.1 to 44.4)        | 30.4 (22.0 to 42.0)        | -1.0 (-1.6 to -0.4)                            | -13.2 (-21.0 to -5.8)               |
| <b>Caribbean</b>                   |                            |                            |                            |                            |                                                |                                     |
| Antigua and Barbuda                | 25.4 (19.3 to 34.0)        | 14.8 (8.7 to 23.5)         | 14.1 (8.3 to 22.4)         | 12.2 (7.2 to 19.6)         | -1.3 (-2.2 to -0.6)                            | -17.8 (-28.3 to -8.0)               |
| The Bahamas                        | 12.1 (8.5 to 16.6)         | 8.1 (4.6 to 13.7)          | 8.1 (4.6 to 13.7)          | 7.5 (4.2 to 13.7)          | -0.5 (-1.2 to 0.3)                             | -6.9 (-17.0 to 3.9)                 |
| Barbados                           | 20.7 (13.0 to 31.3)        | 11.8 (6.9 to 19.2)         | 11.5 (6.8 to 18.9)         | 9.6 (5.6 to 16.1)          | -1.4 (-2.1 to -0.6)                            | -18.7 (-27.2 to -8.7)               |
| Belize                             | 42.3 (32.0 to 56.5)        | 25.8 (16.3 to 39.5)        | 25.0 (15.2 to 38.5)        | 18.3 (10.7 to 29.4)        | -2.4 (-3.3 to -1.4)                            | -29.6 (-39.0 to -19.2)              |
| Bermuda                            | 10.5 (6.1 to 16.6)         | 5.6 (3.0 to 9.2)           | 5.5 (3.0 to 9.2)           | 4.9 (2.6 to 8.1)           | -0.9 (-1.8 to -0.2)                            | -13.0 (-23.3 to -2.4)               |
| Cuba                               | 31.9 (22.1 to 45.5)        | 20.3 (13.8 to 29.4)        | 18.5 (11.9 to 27.4)        | 11.3 (7.0 to 17.7)         | -4.0 (-5.0 to -2.9)                            | -44.7 (-52.4 to -35.7)              |
| Dominica                           | 38.6 (26.9 to 52.2)        | 19.2 (11.4 to 30.0)        | 18.6 (10.8 to 29.0)        | 12.9 (7.2 to 20.9)         | -2.7 (-3.6 to -1.9)                            | -33.3 (-42.1 to -24.8)              |
| Dominican Republic                 | 45.7 (39.7 to 53.4)        | 22.1 (17.4 to 27.7)        | 21.1 (17.4 to 25.7)        | 11.1 (8.0 to 14.9)         | -4.6 (-5.6 to -3.6)                            | -49.7 (-57.0 to -42.2)              |
| Grenada                            | 41.4 (33.1 to 52.3)        | 25.0 (16.6 to 37.3)        | 23.4 (14.9 to 34.7)        | 15.6 (9.6 to 24.3)         | -3.2 (-4.2 to -2.3)                            | -38.1 (-47.1 to -29.5)              |
| Guyana                             | 50.9 (38.5 to 68.9)        | 26.6 (18.3 to 38.8)        | 25.1 (16.9 to 37.0)        | 13.2 (8.5 to 21.2)         | -4.7 (-5.6 to -3.8)                            | -50.6 (-56.9 to -43.8)              |
| Haiti                              | 83.6 (71.6 to 100.0)       | 76.3 (62.8 to 94.8)        | 75.3 (61.6 to 93.6)        | 65.1 (49.0 to 89.9)        | -1.1 (-1.7 to -0.3)                            | -15.2 (-22.3 to -4.8)               |
| Jamaica                            | 43.5 (34.7 to 55.9)        | 35.2 (24.3 to 51.0)        | 33.9 (22.4 to 49.6)        | 30.4 (19.8 to 45.4)        | -1.0 (-1.6 to -0.5)                            | -13.9 (-21.5 to -7.4)               |
| Puerto Rico                        | 3.0 (1.7 to 4.8)           | 2.2 (1.2 to 3.5)           | 2.1 (1.2 to 3.5)           | 2.0 (1.1 to 3.5)           | -0.6 (-1.4 to 0.2)                             | -9.0 (-19.3 to 3.1)                 |
| Saint Lucia                        | 41.0 (32.6 to 51.4)        | 20.3 (14.5 to 29.2)        | 19.3 (13.5 to 29.1)        | 12.4 (8.0 to 19.7)         | -3.4 (-4.9 to -2.2)                            | -39.5 (-51.9 to -28.2)              |
| Saint Vincent and the Grenadines   | 44.1 (35.2 to 55.1)        | 27.7 (17.5 to 40.1)        | 26.4 (16.5 to 38.5)        | 20.0 (12.2 to 30.2)        | -2.2 (-3.1 to -1.4)                            | -28.1 (-37.3 to -19.3)              |
| Suriname                           | 28.3 (22.1 to 36.5)        | 17.0 (11.4 to 24.8)        | 16.6 (10.7 to 24.4)        | 10.6 (6.6 to 15.8)         | -3.2 (-4.1 to -2.3)                            | -38.1 (-46.2 to -28.8)              |
| Trinidad and Tobago                | 27.2 (21.1 to 35.4)        | 13.5 (8.3 to 21.4)         | 13.7 (8.0 to 22.4)         | 10.6 (6.7 to 18.8)         | -1.0 (-2.4 to 0.0)                             | -13.7 (-30.5 to 0.0)                |
| Virgin Islands, U.S.               | 11.9 (6.7 to 19.3)         | 5.5 (3.0 to 9.1)           | 5.5 (3.0 to 9.1)           | 5.1 (2.8 to 8.5)           | -0.5 (-1.4 to 0.3)                             | -7.5 (-18.4 to 4.3)                 |
| <b>Central Latin America</b>       |                            |                            |                            |                            |                                                |                                     |
| Colombia                           | 22.9 (19.7 to 26.7)        | 7.6 (5.4 to 10.7)          | 7.0 (4.8 to 10.3)          | 3.4 (2.3 to 5.1)           | -5.4 (-6.2 to -4.6)                            | -55.4 (-60.7 to -49.8)              |
| Costa Rica                         | 7.9 (5.3 to 11.1)          | 2.1 (1.2 to 3.5)           | 1.9 (1.1 to 3.2)           | 1.1 (0.6 to 1.9)           | -4.3 (-5.5 to -3.2)                            | -47.2 (-56.4 to -38.2)              |
| El Salvador                        | 50.9 (42.4 to 61.3)        | 39.5 (29.5 to 53.9)        | 36.8 (27.2 to 50.4)        | 31.6 (22.7 to 44.3)        | -1.5 (-2.1 to -1.0)                            | -20.1 (-26.7 to -13.9)              |
| Guatemala                          | 48.8 (40.6 to 59.1)        | 38.9 (31.5 to 48.3)        | 36.8 (29.0 to 47.0)        | 26.5 (20.1 to 35.3)        | -2.6 (-3.3 to -1.9)                            | -31.9 (-38.9 to -25.2)              |
| Honduras                           | 54.2 (44.4 to 67.0)        | 35.2 (26.5 to 45.7)        | 33.0 (24.2 to 44.6)        | 21.0 (14.6 to 30.2)        | -3.5 (-4.2 to -2.7)                            | -40.6 (-47.0 to -33.5)              |
| Mexico                             | 22.4 (18.8 to 27.0)        | 11.8 (8.6 to 16.2)         | 11.5 (8.1 to 16.3)         | 8.8 (6.1 to 12.6)          | -2.0 (-3.2 to -1.2)                            | -26.1 (-37.7 to -15.9)              |
| Nicaragua                          | 65.7 (53.8 to 82.0)        | 44.9 (33.8 to 59.8)        | 41.8 (30.5 to 55.4)        | 24.5 (16.1 to 35.6)        | -4.1 (-5.0 to -3.2)                            | -45.8 (-52.9 to -38.2)              |
| Panama                             | 41.7 (34.9 to 51.4)        | 25.7 (19.9 to 33.0)        | 22.3 (16.4 to 29.8)        | 11.3 (8.0 to 15.7)         | -5.5 (-6.3 to -4.7)                            | -56.3 (-61.4 to -50.4)              |



|                                               | Estimate in 2000 (95% UIs) | Estimate in 2015 (95% UIs) | Estimate in 2017 (95% UIs) | Estimate in 2030 (95% UIs) | Annualised rate of change, 2015-2030 (95% UIs) | Percent change, 2015-2030 (95% UIs) |
|-----------------------------------------------|----------------------------|----------------------------|----------------------------|----------------------------|------------------------------------------------|-------------------------------------|
| Venezuela                                     | 13.7 (10.8 to 16.9)        | 9.6 (5.9 to 14.6)          | 9.2 (5.7 to 14.3)          | 7.1 (4.3 to 11.0)          | -2.1 (-2.9 to -1.3)                            | -26.4 (-35.2 to -17.4)              |
| <b>Tropical Latin America</b>                 |                            |                            |                            |                            |                                                |                                     |
| Brazil                                        | 36.4 (30.2 to 44.4)        | 24.8 (18.3 to 33.9)        | 23.3 (16.3 to 32.8)        | 18.1 (12.4 to 25.9)        | -2.1 (-2.8 to -1.4)                            | -27.3 (-34.7 to -19.3)              |
| Paraguay                                      | 41.5 (35.0 to 49.3)        | 18.4 (12.4 to 26.6)        | 17.0 (10.7 to 24.9)        | 11.4 (6.9 to 17.9)         | -3.3 (-4.6 to -2.1)                            | -38.3 (-50.1 to -27.4)              |
| <b>North Africa and Middle East</b>           |                            |                            |                            |                            |                                                |                                     |
| <b>North Africa and Middle East</b>           |                            |                            |                            |                            |                                                |                                     |
| Afghanistan                                   | 89.7 (80.6 to 100.0)       | 73.9 (60.3 to 92.7)        | 72.3 (58.2 to 91.7)        | 54.6 (38.2 to 83.2)        | -2.1 (-3.0 to -0.8)                            | -26.9 (-36.7 to -10.7)              |
| Algeria                                       | 21.8 (17.7 to 26.7)        | 9.3 (5.8 to 13.9)          | 8.4 (5.1 to 12.9)          | 4.2 (5.1 to 6.6)           | -5.3 (-6.4 to -4.3)                            | -54.8 (-61.6 to -47.2)              |
| Bahrain                                       | 12.0 (7.4 to 18.0)         | 7.3 (4.5 to 11.3)          | 6.9 (4.3 to 10.7)          | 4.9 (3.0 to 7.7)           | -2.7 (-3.5 to -1.9)                            | -33.0 (-40.7 to -25.0)              |
| Egypt                                         | 65.9 (61.4 to 71.0)        | 27.7 (21.5 to 35.1)        | 25.9 (17.6 to 31.9)        | 16.8 (12.1 to 23.1)        | -3.4 (-4.2 to -2.7)                            | -39.7 (-46.5 to -32.9)              |
| Iran                                          | 21.9 (14.3 to 31.9)        | 8.5 (5.2 to 13.1)          | 7.8 (4.7 to 12.2)          | 5.8 (3.6 to 9.4)           | -2.5 (-3.5 to -1.6)                            | -31.1 (-40.9 to -21.4)              |
| Iraq                                          | 26.0 (20.6 to 33.1)        | 22.5 (16.6 to 30.5)        | 20.3 (14.4 to 28.8)        | 11.7 (7.8 to 17.3)         | -4.4 (-5.4 to -3.5)                            | -48.4 (-55.7 to -40.7)              |
| Jordan                                        | 15.9 (11.8 to 20.7)        | 7.6 (4.6 to 11.4)          | 5.8 (3.4 to 9.1)           | 2.5 (1.5 to 4.1)           | -7.3 (-8.1 to -6.5)                            | -66.5 (-70.4 to -62.4)              |
| Kuwait                                        | 10.2 (6.2 to 15.1)         | 3.8 (2.2 to 5.9)           | 3.4 (2.0 to 5.5)           | 2.8 (1.6 to 4.5)           | -2.0 (-3.1 to -0.9)                            | -25.3 (-37.6 to -12.9)              |
| Lebanon                                       | 16.7 (12.6 to 21.4)        | 2.6 (1.5 to 4.2)           | 2.4 (1.3 to 3.8)           | 1.9 (1.1 to 3.1)           | -1.9 (-3.1 to -1.0)                            | -25.0 (-37.6 to -14.1)              |
| Libya                                         | 39.6 (31.5 to 48.1)        | 12.1 (7.4 to 18.1)         | 13.2 (8.1 to 19.7)         | 8.0 (4.7 to 12.7)          | -2.8 (-4.3 to -1.5)                            | -33.7 (-47.3 to -20.4)              |
| Morocco                                       | 34.9 (30.8 to 39.5)        | 14.2 (9.8 to 19.6)         | 12.8 (8.5 to 18.2)         | 5.9 (3.8 to 8.8)           | -5.9 (-6.7 to -5.0)                            | -58.6 (-63.5 to -52.9)              |
| Palestine                                     | 25.9 (19.1 to 34.2)        | 9.5 (7.2 to 12.2)          | 8.5 (6.1 to 11.4)          | 5.0 (3.4 to 7.0)           | -4.3 (-5.4 to -3.3)                            | -47.6 (-55.2 to -39.2)              |
| Oman                                          | 7.2 (4.5 to 10.6)          | 2.7 (1.6 to 4.3)           | 2.5 (1.4 to 3.9)           | 2.1 (1.2 to 3.9)           | -1.6 (-2.9 to -0.6)                            | -21.1 (-35.6 to -8.3)               |
| Qatar                                         | 9.0 (5.4 to 13.6)          | 4.5 (2.6 to 6.9)           | 4.1 (2.4 to 6.5)           | 3.3 (1.9 to 5.3)           | -1.9 (-3.0 to -0.9)                            | -24.6 (-35.9 to -12.7)              |
| Saudi Arabia                                  | 20.3 (13.4 to 29.7)        | 4.1 (2.5 to 6.4)           | 3.6 (2.1 to 5.6)           | 2.0 (1.1 to 3.2)           | -4.9 (-6.5 to -3.6)                            | -51.5 (-62.6 to -41.4)              |
| Sudan                                         | 88.1 (81.2 to 97.3)        | 82.5 (73.0 to 95.5)        | 80.6 (70.6 to 94.0)        | 80.2 (55.1 to 88.8)        | -1.3 (-1.9 to -0.5)                            | -17.6 (-25.1 to -7.2)               |
| Syria                                         | 24.1 (19.3 to 30.5)        | 10.7 (6.7 to 16.3)         | 9.7 (5.9 to 15.1)          | 6.3 (3.7 to 10.7)          | -3.3 (-4.8 to -2.2)                            | -38.8 (-51.1 to -28.1)              |
| Tunisia                                       | 18.8 (13.5 to 25.6)        | 15.8 (11.0 to 21.7)        | 14.2 (9.5 to 19.8)         | 11.9 (8.0 to 16.8)         | -1.9 (-2.7 to -1.2)                            | -25.0 (-32.8 to -16.1)              |
| Turkey                                        | 30.4 (26.6 to 34.6)        | 10.4 (7.1 to 14.9)         | 8.9 (5.8 to 13.1)          | 4.8 (3.0 to 7.1)           | -5.2 (-6.2 to -4.3)                            | -54.3 (-60.4 to -47.3)              |
| United Arab Emirates                          | 2.2 (1.3 to 3.5)           | 1.4 (0.8 to 2.2)           | 1.4 (0.8 to 2.2)           | 1.2 (0.7 to 1.9)           | -1.2 (-2.0 to -0.1)                            | -14.4 (-25.5 to -1.3)               |
| Yemen                                         | 86.0 (79.4 to 94.5)        | 44.9 (38.4 to 52.8)        | 44.2 (36.3 to 53.1)        | 25.3 (19.3 to 33.0)        | -3.9 (-4.7 to -3.0)                            | -43.9 (-50.9 to -36.0)              |
| <b>South Asia</b>                             |                            |                            |                            |                            |                                                |                                     |
| <b>South Asia</b>                             |                            |                            |                            |                            |                                                |                                     |
| Bangladesh                                    | 78.5 (67.7 to 94.2)        | 66.8 (54.1 to 84.2)        | 65.4 (52.4 to 83.5)        | 46.4 (32.9 to 69.4)        | -2.5 (-3.4 to -1.4)                            | -31.0 (-39.8 to -18.7)              |
| Bhutan                                        | 69.1 (59.6 to 81.1)        | 45.3 (33.0 to 54.5)        | 40.1 (29.6 to 52.2)        | 21.5 (14.3 to 30.9)        | -4.7 (-5.9 to -3.7)                            | -50.8 (-58.7 to -42.9)              |
| India                                         | 73.1 (68.2 to 79.2)        | 39.5 (33.2 to 46.5)        | 34.9 (27.9 to 43.3)        | 18.0 (13.4 to 23.5)        | -5.3 (-6.2 to -4.3)                            | -54.6 (-60.5 to -47.9)              |
| Nepal                                         | 78.3 (74.4 to 83.0)        | 48.0 (41.8 to 54.0)        | 45.0 (38.0 to 52.3)        | 25.1 (19.8 to 31.0)        | -4.3 (-5.2 to -3.6)                            | -47.8 (-54.1 to -41.3)              |
| Pakistan                                      | 54.8 (50.3 to 59.9)        | 36.1 (31.8 to 41.9)        | 34.9 (29.3 to 41.4)        | 19.5 (15.7 to 24.2)        | -4.1 (-4.8 to -3.4)                            | -46.1 (-51.2 to -40.3)              |
| <b>Southeast Asia, East Asia, and Oceania</b> |                            |                            |                            |                            |                                                |                                     |
| <b>East Asia</b>                              |                            |                            |                            |                            |                                                |                                     |
| China                                         | 54.8 (48.4 to 63.5)        | 26.7 (18.2 to 36.9)        | 24.7 (16.4 to 34.2)        | 12.6 (7.9 to 18.6)         | -5.1 (-6.0 to -4.1)                            | -53.2 (-59.2 to -46.2)              |
| North Korea                                   | 43.8 (33.2 to 54.3)        | 35.0 (24.2 to 46.8)        | 33.6 (23.1 to 45.2)        | 30.1 (20.3 to 41.4)        | -1.0 (-1.6 to -0.5)                            | -14.2 (-21.5 to -7.2)               |
| Taiwan (Province of China)                    | 12.4 (7.2 to 18.6)         | 4.7 (2.6 to 6.9)           | 4.4 (2.6 to 6.9)           | 2.8 (1.6 to 4.8)           | -3.4 (-4.4 to -2.5)                            | -39.8 (-48.5 to -31.3)              |
| <b>Oceania</b>                                |                            |                            |                            |                            |                                                |                                     |
| American Samoa                                | 16.6 (10.7 to 24.8)        | 8.5 (5.0 to 12.3)          | 8.2 (4.9 to 12.3)          | 7.3 (3.4 to 11.2)          | -1.0 (-1.9 to -0.2)                            | -13.7 (-24.5 to -2.5)               |
| Federated States of Micronesia                | 41.5 (29.2 to 54.3)        | 24.6 (16.2 to 34.3)        | 23.5 (15.6 to 33.0)        | 17.3 (11.1 to 25.5)        | -2.4 (-3.5 to -1.4)                            | -29.7 (-41.1 to -19.4)              |
| Fiji                                          | 30.3 (21.6 to 40.0)        | 19.8 (13.1 to 28.5)        | 18.4 (11.8 to 26.4)        | 16.8 (10.8 to 24.4)        | -1.1 (-2.0 to -0.4)                            | -15.3 (-25.5 to -5.5)               |
| Guam                                          | 6.6 (4.0 to 9.9)           | 3.4 (2.0 to 5.3)           | 3.1 (1.9 to 5.0)           | 3.1 (1.9 to 5.0)           | -0.5 (-1.3 to 0.3)                             | -7.0 (-17.2 to 4.4)                 |
| Kiribati                                      | 71.8 (61.3 to 81.9)        | 58.7 (46.7 to 70.0)        | 56.8 (44.7 to 68.0)        | 40.3 (29.0 to 52.5)        | -2.6 (-3.4 to -1.8)                            | -31.7 (-40.0 to -24.0)              |
| Marshall Islands                              | 52.4 (40.1 to 64.5)        | 30.3 (21.1 to 41.2)        | 28.7 (19.5 to 39.6)        | 17.9 (11.6 to 25.9)        | -3.5 (-4.5 to -2.8)                            | -41.2 (-49.0 to -33.8)              |
| Northern Mariana Islands                      | 5.9 (3.5 to 9.2)           | 4.8 (2.8 to 7.5)           | 4.7 (2.8 to 7.4)           | 4.4 (2.6 to 6.9)           | -0.6 (-1.4 to 0.2)                             | -8.4 (-18.6 to 3.6)                 |
| Papua New Guinea                              | 87.4 (80.6 to 95.5)        | 81.1 (72.2 to 89.9)        | 79.8 (71.0 to 89.1)        | 68.4 (57.0 to 81.7)        | -1.1 (-1.7 to -0.6)                            | -15.8 (-22.2 to -8.7)               |
| Samoa                                         | 10.8 (6.7 to 16.1)         | 4.4 (2.7 to 6.7)           | 4.0 (2.4 to 6.1)           | 3.5 (2.1 to 5.5)           | -1.4 (-2.3 to -0.6)                            | -18.6 (-28.8 to -8.0)               |
| Solomon Islands                               | 81.0 (73.3 to 88.6)        | 75.0 (63.3 to 82.2)        | 71.3 (61.0 to 81.5)        | 55.7 (44.1 to 68.7)        | -1.8 (-2.5 to -1.2)                            | -23.9 (-31.6 to -15.9)              |
| Tonga                                         | 30.6 (21.5 to 41.2)        | 17.0 (11.0 to 24.9)        | 16.0 (10.3 to 23.6)        | 9.7 (6.0 to 15.1)          | -3.7 (-4.6 to -2.9)                            | -42.9 (-50.1 to -35.0)              |
| Vanuatu                                       | 78.6 (70.4 to 87.4)        | 70.2 (60.0 to 80.3)        | 69.0 (58.3 to 78.9)        | 54.8 (42.8 to 67.0)        | -1.7 (-2.3 to -1.1)                            | -22.1 (-29.6 to -15.5)              |
| <b>Southeast Asia</b>                         |                            |                            |                            |                            |                                                |                                     |
| Cambodia                                      | 83.0 (77.4 to 87.8)        | 46.5 (38.4 to 54.7)        | 43.1 (34.3 to 52.0)        | 23.6 (17.4 to 30.7)        | -4.6 (-5.6 to -3.6)                            | -49.4 (-56.6 to -42.0)              |
| Indonesia                                     | 48.1 (41.6 to 56.4)        | 22.7 (16.4 to 30.4)        | 20.7 (14.4 to 28.0)        | 9.9 (6.6 to 14.0)          | -5.6 (-6.5 to -4.8)                            | -56.7 (-62.3 to -51.1)              |
| Laos                                          | 74.2 (68.6 to 80.6)        | 66.5 (59.1 to 74.5)        | 62.9 (54.0 to 71.9)        | 48.6 (39.3 to 59.0)        | -2.1 (-2.7 to -1.5)                            | -27.0 (-33.4 to -20.6)              |
| Malaysia                                      | 7.1 (4.5 to 10.7)          | 3.2 (1.9 to 5.1)           | 2.9 (1.7 to 4.6)           | 1.9 (1.1 to 3.2)           | -3.4 (-4.5 to -2.4)                            | -39.7 (-49.3 to -30.4)              |
| Maldives                                      | 45.7 (35.1 to 58.3)        | 17.7 (11.7 to 25.8)        | 16.1 (10.2 to 23.7)        | 7.2 (4.4 to 11.2)          | -6.0 (-7.1 to -5.0)                            | -59.4 (-65.7 to -52.9)              |
| Mauritius                                     | 12.5 (9.3 to 16.5)         | 4.8 (3.0 to 7.4)           | 4.6 (2.9 to 7.1)           | 3.4 (2.0 to 5.3)           | -2.4 (-3.6 to -1.4)                            | -30.4 (-42.1 to -19.3)              |
| Myanmar                                       | 86.3 (77.7 to 97.5)        | 52.4 (43.2 to 64.6)        | 47.8 (38.7 to 60.0)        | 27.1 (20.2 to 37.9)        | -4.4 (-5.3 to -3.5)                            | -48.5 (-55.0 to -40.8)              |
| Philippines                                   | 31.3 (28.4 to 34.6)        | 12.6 (9.8 to 15.9)         | 11.8 (8.7 to 15.6)         | 5.9 (4.2 to 8.1)           | -5.1 (-6.1 to -4.2)                            | -53.5 (-59.7 to -46.4)              |
| Sri Lanka                                     | 66.1 (55.4 to 76.4)        | 31.6 (21.8 to 43.2)        | 28.8 (19.6 to 39.8)        | 14.2 (8.6 to 21.4)         | -5.4 (-6.4 to -4.4)                            | -55.4 (-61.6 to -48.3)              |
| Seychelles                                    | 23.6 (15.6 to 32.0)        | 13.3 (8.6 to 19.7)         | 11.9 (7.5 to 17.7)         | 6.7 (4.2 to 10.5)          | -4.6 (-5.6 to -3.5)                            | -49.4 (-57.1 to -40.9)              |
| Thailand                                      | 9.2 (5.5 to 14.2)          | 2.4 (1.4 to 3.8)           | 2.1 (1.2 to 3.5)           | 1.1 (0.6 to 1.8)           | -5.0 (-6.1 to -4.1)                            | -52.9 (-59.8 to -46.0)              |
| Timor-Leste                                   | 91.5 (84.0 to 100.0)       | 72.5 (61.3 to 83.7)        | 72.1 (61.0 to 83.1)        | 52.5 (39.6 to 67.5)        | -2.2 (-3.1 to -1.4)                            | -27.9 (-37.1 to -18.4)              |
| Vietnam                                       | 70.3 (60.6 to 83.9)        | 29.3 (23.6 to 36.6)        | 26.7 (20.4 to 34.4)        | 13.6 (9.8 to 18.4)         | -5.2 (-6.2 to -4.2)                            | -53.9 (-60.8 to -46.9)              |
| <b>Sub-Saharan Africa</b>                     |                            |                            |                            |                            |                                                |                                     |
| <b>Central Sub-Saharan Africa</b>             |                            |                            |                            |                            |                                                |                                     |
| Angola                                        | 71.4 (60.4 to 85.0)        | 60.1 (49.2 to 72.8)        | 56.4 (44.9 to 70.1)        | 44.1 (32.4 to 58.2)        | -2.1 (-3.0 to -1.3)                            | -27.0 (-35.9 to -18.3)              |
| Central African Republic                      | 88.5 (76.9 to 100.0)       | 88.0 (76.0 to 100.0)       | 87.9 (75.8 to 100.0)       | 86.3 (73.0 to 100.0)       | -0.1 (-0.3 to 0.0)                             | -2.0 (-4.7 to 0.0)                  |
| Congo                                         | 80.4 (67.8 to 98.2)        | 71.5 (57.6 to 89.0)        | 69.6 (55.6 to 87.0)        | 54.7 (38.9 to 78.1)        | -1.8 (-2.8 to -0.8)                            | -34.0 (-43.3 to -11.5)              |
| Democratic Republic of the Congo              | 85.2 (73.3 to 100.0)       | 76.7 (65.2 to 92.3)        | 74.9 (63.0 to 90.9)        | 58.6 (44.3 to 82.4)        | -1.9 (-2.7 to -0.8)                            | -24.1 (-33.1 to -11.1)              |
| Equatorial Guinea                             | 75.1 (63.5 to 90.9)        | 30.9 (20.3 to 44.6)        | 28.2 (17.8 to 42.1)        | 16.3 (9.7 to 26.5)         | -4.3 (-5.6 to -3.2)                            | -47.7 (-56.6 to -38.6)              |
| Gabon                                         | 65.7 (51.3 to 86.5)        | 49.8 (37.1 to 66.9)        | 46.1 (33.9 to 62.3)        | 29.7 (19.8 to 45.0)        | -3.5 (-4.4 to -2.5)                            | -40.8 (-48.3 to -31.6)              |
| <b>Eastern Sub-Saharan Africa</b>             |                            |                            |                            |                            |                                                |                                     |
| Burundi                                       | 87.8 (76.0 to 100.0)       | 85.1 (71.2 to 100.0)       | 85.1 (71.2 to 100.0)       | 81.0 (64.5 to 100.0)       | -0.4 (-0.8 to 0.0)                             | -5.1 (-11.8 to 0.0)                 |
| Comoros                                       | 84.8 (72.0 to 100.0)       | 79.1 (66.8 to 96.6)        | 78.2 (65.8 to 95.5)        | 64.5 (47.7 to 91.7)        | -1.4 (-2.3 to -0.3)                            | -19.0 (-28.8 to -5.1)               |
| Djibouti                                      | 81.4 (67.5 to 98.8)        | 70.6 (55.6 to 89.7)        | 68.5 (53.7 to 87.5)        | 56.2 (40.1 to 80.6)        | -1.6 (-2.5 to -0.7)                            | -20.8 (-30.9 to -10.2)              |
| Eritrea                                       | 86.6 (78.3 to 96.7)        | 82.1 (72.0 to 96.2)        | 80.9 (71.0 to 95.2)        | 68.8 (55.3 to 86.6)        | -1.2 (-1.9 to -0.4)                            | -16.4 (-24.4 to -5.4)               |
| Ethiopia                                      | 95.6 (91.8 to 99.8)        | 91.7 (86.3 to 98.4)        | 90.9 (85.3 to 97.9)        | 89.8 (83.5 to 97.6)        | -0.1 (-0.3 to 0.0)                             | -2.1 (-4.1 to 0.6)                  |

|                                                                                                                                                                                   | Estimate in 2000 (95% UIs) | Estimate in 2015 (95% UIs) | Estimate in 2017 (95% UIs) | Estimate in 2020 (95% UIs) | Annualised rate of change, 2015-2020 (95% UIs) | Percent change, 2015-2020 (95% UIs) |
|-----------------------------------------------------------------------------------------------------------------------------------------------------------------------------------|----------------------------|----------------------------|----------------------------|----------------------------|------------------------------------------------|-------------------------------------|
| Kenya                                                                                                                                                                             | 78.8 (66.8 to 94.5)        | 71.5 (60.0 to 86.3)        | 70.3 (58.5 to 85.4)        | 58.5 (45.1 to 77.7)        | -1.4 (-1.9 to -0.7)                            | -18.6 (-24.8 to -10.0)              |
| Madagascar                                                                                                                                                                        | 90.5 (83.5 to 99.5)        | 92.9 (87.5 to 99.3)        | 92.5 (86.8 to 98.5)        | 90.0 (82.4 to 98.5)        | -0.2 (-0.4 to 0.1)                             | -3.2 (-5.7 to -0.7)                 |
| Malawi                                                                                                                                                                            | 87.1 (76.1 to 100.0)       | 82.2 (68.0 to 100.0)       | 81.9 (67.0 to 100.0)       | 76.3 (58.8 to 100.0)       | -0.5 (-1.2 to 0.0)                             | -7.6 (-16.7 to -0.0)                |
| Mozambique                                                                                                                                                                        | 90.8 (82.8 to 100.0)       | 83.0 (73.0 to 96.0)        | 82.0 (71.8 to 95.3)        | 68.6 (54.7 to 90.5)        | -1.3 (-2.0 to -0.4)                            | -17.7 (-26.5 to -5.4)               |
| Rwanda                                                                                                                                                                            | 78.7 (57.3 to 100.0)       | 77.6 (56.1 to 100.0)       | 77.5 (56.1 to 100.0)       | 69.7 (44.9 to 100.0)       | -0.8 (-1.7 to 0.0)                             | -11.0 (-22.3 to -0.0)               |
| Somalia                                                                                                                                                                           | 87.9 (77.0 to 100.0)       | 82.7 (70.3 to 100.0)       | 82.3 (69.4 to 99.3)        | 73.2 (56.7 to 98.3)        | -0.8 (-1.6 to 0.1)                             | -11.8 (-21.1 to -0.9)               |
| South Sudan                                                                                                                                                                       | 91.5 (82.6 to 100.0)       | 92.0 (83.7 to 100.0)       | 91.8 (83.6 to 100.0)       | 91.2 (82.5 to 100.0)       | -0.1 (-0.1 to 0.0)                             | -0.9 (-2.1 to 0.0)                  |
| Tanzania                                                                                                                                                                          | 81.7 (66.3 to 100.0)       | 72.9 (60.8 to 91.7)        | 71.9 (59.3 to 91.3)        | 53.9 (38.6 to 82.6)        | -2.1 (-3.1 to -0.8)                            | -26.7 (-37.5 to -10.9)              |
| Uganda                                                                                                                                                                            | 83.8 (68.1 to 100.0)       | 81.2 (63.6 to 100.0)       | 80.9 (63.4 to 100.0)       | 76.5 (56.0 to 100.0)       | -0.4 (-1.1 to 0.0)                             | -6.1 (-14.8 to 0.0)                 |
| Zambia                                                                                                                                                                            | 78.9 (72.8 to 88.3)        | 73.1 (63.8 to 85.9)        | 71.0 (61.1 to 84.1)        | 60.5 (49.5 to 76.7)        | -1.3 (-1.8 to -0.7)                            | -17.5 (-23.6 to -9.9)               |
| <b>Southern Sub-Saharan Africa</b>                                                                                                                                                |                            |                            |                            |                            |                                                |                                     |
| Botswana                                                                                                                                                                          | 69.1 (55.2 to 88.5)        | 47.0 (34.5 to 65.1)        | 44.2 (31.6 to 61.8)        | 25.9 (16.7 to 41.6)        | -4.1 (-5.2 to -2.9)                            | -45.6 (-53.8 to -35.0)              |
| Lesotho                                                                                                                                                                           | 86.7 (74.4 to 100.0)       | 80.9 (64.6 to 100.0)       | 80.1 (64.0 to 100.0)       | 72.9 (53.4 to 100.0)       | -0.7 (-1.4 to 0.0)                             | -10.3 (-18.8 to -0.0)               |
| Namibia                                                                                                                                                                           | 65.1 (38.9 to 72.5)        | 54.5 (46.9 to 64.0)        | 51.4 (42.7 to 61.8)        | 37.7 (29.0 to 48.5)        | -2.5 (-3.4 to -1.5)                            | -31.0 (-39.9 to -20.7)              |
| South Africa                                                                                                                                                                      | 39.0 (31.9 to 48.9)        | 32.6 (23.9 to 46.7)        | 31.2 (22.4 to 44.7)        | 23.6 (16.2 to 36.0)        | -2.2 (-2.8 to -1.6)                            | -27.8 (-34.3 to -20.8)              |
| Swaziland                                                                                                                                                                         | 76.0 (63.9 to 93.0)        | 67.3 (52.9 to 86.5)        | 65.2 (51.0 to 84.1)        | 48.8 (33.8 to 71.9)        | -2.2 (-3.1 to -1.1)                            | -28.1 (-37.4 to -15.8)              |
| Zimbabwe                                                                                                                                                                          | 60.7 (51.4 to 72.6)        | 61.4 (50.3 to 76.7)        | 60.0 (48.2 to 75.9)        | 52.0 (39.9 to 69.4)        | -1.1 (-1.7 to -0.6)                            | -15.7 (-22.2 to -9.2)               |
| <b>Western Sub-Saharan Africa</b>                                                                                                                                                 |                            |                            |                            |                            |                                                |                                     |
| Benin                                                                                                                                                                             | 89.7 (79.7 to 100.0)       | 83.6 (72.6 to 99.4)        | 82.5 (71.1 to 98.4)        | 74.4 (59.5 to 97.2)        | -0.8 (-1.4 to 0.1)                             | -11.3 (-19.1 to -1.6)               |
| Burkina Faso                                                                                                                                                                      | 91.7 (83.5 to 100.0)       | 89.1 (80.5 to 100.0)       | 88.7 (79.9 to 100.0)       | 83.8 (72.0 to 100.0)       | -0.4 (-0.8 to 0.0)                             | -6.1 (-10.7 to -0.0)                |
| Cameroun                                                                                                                                                                          | 80.2 (64.2 to 100.0)       | 72.3 (56.8 to 94.0)        | 70.0 (54.4 to 91.3)        | 57.2 (39.9 to 85.7)        | -1.6 (-2.4 to -0.6)                            | -21.5 (-30.1 to -8.9)               |
| Cote d'Ivoire                                                                                                                                                                     | 75.9 (62.6 to 93.1)        | 46.2 (33.8 to 62.0)        | 44.0 (32.0 to 59.5)        | 25.9 (17.1 to 39.2)        | -3.9 (-5.0 to -2.9)                            | -44.5 (-52.9 to -35.3)              |
| Chad                                                                                                                                                                              | 92.5 (84.4 to 100.0)       | 89.9 (80.5 to 100.0)       | 89.5 (80.5 to 100.0)       | 88.0 (77.8 to 100.0)       | -0.1 (-0.3 to 0.0)                             | -2.2 (-4.4 to 0.0)                  |
| Cote d'Ivoire                                                                                                                                                                     | 75.3 (65.2 to 89.2)        | 67.7 (55.8 to 81.7)        | 66.2 (53.5 to 81.7)        | 53.0 (39.6 to 71.8)        | -1.7 (-2.3 to -0.9)                            | -22.1 (-29.4 to -12.7)              |
| The Gambia                                                                                                                                                                        | 79.3 (64.7 to 100.0)       | 68.6 (54.3 to 88.4)        | 68.0 (53.3 to 88.0)        | 59.3 (43.3 to 83.0)        | -1.0 (-2.0 to -0.3)                            | -13.9 (-25.5 to -4.9)               |
| Ghana                                                                                                                                                                             | 81.6 (69.3 to 100.0)       | 68.9 (55.8 to 88.8)        | 67.1 (54.2 to 87.4)        | 48.9 (34.9 to 76.1)        | -2.4 (-3.2 to -1.1)                            | -29.7 (-38.2 to -15.0)              |
| Guinea                                                                                                                                                                            | 88.1 (77.5 to 100.0)       | 78.5 (65.9 to 93.8)        | 76.9 (64.0 to 92.5)        | 62.8 (46.7 to 86.1)        | -1.5 (-2.4 to -0.6)                            | -20.5 (-30.6 to -8.1)               |
| Guinea-Bissau                                                                                                                                                                     | 85.3 (74.2 to 100.0)       | 79.4 (66.4 to 96.6)        | 78.1 (65.2 to 95.6)        | 69.6 (53.2 to 92.6)        | -0.9 (-1.6 to -0.2)                            | -12.7 (-20.8 to -3.6)               |
| Liberia                                                                                                                                                                           | 87.2 (77.3 to 99.3)        | 72.7 (62.6 to 87.0)        | 72.1 (61.2 to 86.4)        | 59.5 (46.3 to 78.1)        | -1.4 (-2.1 to -0.6)                            | -18.5 (-27.3 to -9.2)               |
| Mali                                                                                                                                                                              | 85.1 (70.7 to 100.0)       | 83.0 (69.7 to 100.0)       | 82.6 (69.1 to 100.0)       | 77.2 (60.1 to 100.0)       | -0.5 (-1.1 to 0.0)                             | -7.4 (-15.8 to 0.0)                 |
| Mauritania                                                                                                                                                                        | 87.4 (74.3 to 100.0)       | 77.9 (63.9 to 97.7)        | 76.6 (62.5 to 96.3)        | 61.3 (43.7 to 92.5)        | -1.7 (-2.7 to -0.7)                            | -22.0 (-32.8 to -5.5)               |
| Niger                                                                                                                                                                             | 93.3 (86.1 to 100.0)       | 90.9 (82.3 to 100.0)       | 90.6 (81.7 to 100.0)       | 84.8 (71.7 to 100.0)       | -0.5 (-0.9 to 0.0)                             | -6.9 (-12.9 to -0.0)                |
| Nigeria                                                                                                                                                                           | 77.7 (64.7 to 97.6)        | 55.0 (46.1 to 67.8)        | 50.4 (41.6 to 62.5)        | 31.5 (23.9 to 42.8)        | -3.8 (-4.5 to -2.9)                            | -43.0 (-49.1 to -35.1)              |
| Sao Tome and Principe                                                                                                                                                             | 78.2 (66.0 to 93.3)        | 50.5 (37.4 to 67.4)        | 47.3 (34.3 to 63.9)        | 28.0 (18.1 to 42.8)        | -4.0 (-5.0 to -2.9)                            | -45.2 (-52.9 to -35.3)              |
| Senegal                                                                                                                                                                           | 72.2 (61.5 to 88.4)        | 63.7 (48.9 to 86.2)        | 64.1 (49.1 to 86.7)        | 61.1 (45.8 to 85.1)        | -0.3 (-0.8 to 0.0)                             | -4.4 (-11.4 to 0.7)                 |
| Sierra Leone                                                                                                                                                                      | 88.1 (76.6 to 100.0)       | 82.2 (69.4 to 100.0)       | 81.2 (68.4 to 100.0)       | 71.1 (54.3 to 100.0)       | -1.0 (-1.7 to 0.0)                             | -14.1 (-22.1 to -0.0)               |
| Togo                                                                                                                                                                              | 84.2 (73.4 to 99.5)        | 75.4 (62.5 to 93.0)        | 73.8 (60.6 to 91.7)        | 60.2 (44.2 to 85.6)        | -1.6 (-2.3 to -0.6)                            | -20.6 (-29.7 to -8.2)               |
| <b>Indicator 6.2.1b: Risk-weighted prevalence of populations without access to a handwashing facility, as measured by the summary exposure value (SEV) for unsafe hygiene (%)</b> |                            |                            |                            |                            |                                                |                                     |
| <b>Central Europe, Eastern Europe, and Central Asia</b>                                                                                                                           |                            |                            |                            |                            |                                                |                                     |
| <b>Central Asia</b>                                                                                                                                                               |                            |                            |                            |                            |                                                |                                     |
| Armenia                                                                                                                                                                           | 18.1 (15.3 to 21.4)        | 12.5 (10.3 to 14.9)        | 12.2 (9.8 to 14.5)         | 10.1 (8.1 to 12.1)         | -1.5 (-1.7 to -1.2)                            | -19.6 (-22.9 to -16.4)              |
| Azerbaijan                                                                                                                                                                        | 24.3 (20.2 to 28.9)        | 9.4 (7.6 to 11.6)          | 9.2 (7.4 to 11.3)          | 6.5 (5.2 to 8.0)           | -2.5 (-2.8 to -2.2)                            | -31.7 (-34.6 to -28.6)              |
| Georgia                                                                                                                                                                           | 15.1 (12.5 to 18.4)        | 10.8 (8.7 to 13.2)         | 10.2 (8.3 to 12.6)         | 7.7 (6.2 to 9.6)           | -2.2 (-2.5 to -2.0)                            | -28.5 (-31.5 to -25.5)              |
| Kazakhstan                                                                                                                                                                        | 19.2 (15.9 to 23.2)        | 11.1 (9.0 to 13.5)         | 10.4 (8.4 to 12.7)         | 7.7 (6.2 to 9.4)           | -2.5 (-2.8 to -2.2)                            | -30.8 (-33.8 to -27.7)              |
| Kyrgyzstan                                                                                                                                                                        | 22.9 (19.2 to 27.2)        | 13.7 (11.4 to 16.1)        | 13.3 (11.0 to 15.8)        | 9.7 (7.9 to 11.6)          | -2.3 (-2.6 to -2.0)                            | -29.3 (-32.2 to -26.3)              |
| Mongolia                                                                                                                                                                          | 34.5 (29.8 to 39.4)        | 31.0 (27.4 to 34.8)        | 29.4 (25.6 to 33.1)        | 22.8 (19.6 to 26.1)        | -2.1 (-2.4 to -1.8)                            | -26.7 (-29.9 to -23.5)              |
| Tajikistan                                                                                                                                                                        | 30.4 (25.9 to 35.2)        | 26.1 (22.8 to 30.0)        | 25.0 (21.7 to 28.9)        | 21.4 (18.4 to 24.8)        | -1.4 (-1.6 to -1.1)                            | -18.4 (-21.3 to -15.4)              |
| Turkmenistan                                                                                                                                                                      | 23.0 (19.1 to 27.2)        | 16.6 (13.5 to 20.2)        | 15.4 (12.5 to 18.8)        | 10.6 (8.4 to 13.0)         | -3.0 (-3.3 to -2.7)                            | -36.4 (-39.1 to -33.7)              |
| Uzbekistan                                                                                                                                                                        | 23.8 (19.9 to 28.2)        | 16.1 (13.2 to 19.3)        | 15.0 (12.2 to 18.1)        | 10.2 (8.3 to 12.5)         | -3.0 (-3.3 to -2.7)                            | -36.2 (-39.0 to -33.5)              |
| <b>Central Europe</b>                                                                                                                                                             |                            |                            |                            |                            |                                                |                                     |
| Albania                                                                                                                                                                           | 8.3 (6.6 to 10.5)          | 6.0 (4.8 to 7.5)           | 5.8 (4.5 to 7.1)           | 4.5 (3.6 to 5.6)           | -1.9 (-2.2 to -1.6)                            | -25.2 (-28.6 to -21.7)              |
| Bosnia and Herzegovina                                                                                                                                                            | 5.3 (4.2 to 6.5)           | 4.2 (3.3 to 5.2)           | 4.0 (3.2 to 5.2)           | 3.0 (2.9 to 4.5)           | -1.0 (-1.3 to -0.7)                            | -14.2 (-17.9 to -10.2)              |
| Bulgaria                                                                                                                                                                          | 3.9 (3.1 to 4.8)           | 3.3 (2.6 to 4.1)           | 3.2 (2.5 to 4.1)           | 2.8 (2.2 to 3.5)           | -1.1 (-1.4 to -0.8)                            | -15.3 (-18.8 to -11.6)              |
| Croatia                                                                                                                                                                           | 3.4 (2.7 to 4.2)           | 3.0 (2.4 to 3.7)           | 3.0 (2.4 to 3.7)           | 2.8 (2.2 to 3.4)           | -0.6 (-0.9 to -0.3)                            | -8.2 (-12.3 to -3.9)                |
| Czech Republic                                                                                                                                                                    | 2.8 (2.2 to 3.5)           | 2.7 (2.1 to 3.4)           | 2.7 (2.1 to 3.4)           | 2.5 (2.0 to 3.2)           | -0.5 (-0.8 to -0.2)                            | -6.6 (-10.9 to -2.4)                |
| Hungary                                                                                                                                                                           | 3.0 (2.3 to 3.6)           | 2.8 (2.2 to 3.5)           | 2.8 (2.2 to 3.5)           | 2.6 (2.0 to 3.3)           | -0.4 (-0.7 to 0.1)                             | -6.2 (-10.4 to -1.7)                |
| Macedonia                                                                                                                                                                         | 4.0 (3.1 to 5.0)           | 3.3 (2.6 to 4.1)           | 3.3 (2.6 to 4.1)           | 3.0 (2.4 to 3.7)           | -0.7 (-1.0 to -0.4)                            | -10.1 (-14.1 to -6.3)               |
| Montenegro                                                                                                                                                                        | 4.7 (3.8 to 5.8)           | 3.9 (3.0 to 4.8)           | 3.8 (3.0 to 4.7)           | 3.1 (2.4 to 3.9)           | -1.4 (-1.7 to -1.1)                            | -19.2 (-22.8 to -15.5)              |
| Poland                                                                                                                                                                            | 3.4 (2.7 to 4.3)           | 2.9 (2.3 to 3.7)           | 2.9 (2.3 to 3.6)           | 2.5 (2.0 to 3.1)           | -1.0 (-1.3 to -0.7)                            | -13.7 (-17.3 to -9.7)               |
| Romania                                                                                                                                                                           | 8.8 (7.0 to 10.6)          | 5.5 (4.3 to 6.8)           | 5.2 (4.1 to 6.3)           | 4.0 (3.2 to 5.0)           | -2.1 (-2.4 to -1.8)                            | -26.8 (-30.2 to -23.2)              |
| Serbia                                                                                                                                                                            | 6.3 (4.9 to 7.8)           | 3.4 (2.7 to 4.2)           | 3.3 (2.6 to 4.1)           | 2.8 (2.2 to 3.5)           | -1.3 (-1.7 to -0.9)                            | -17.2 (-22.3 to -12.2)              |
| Slovakia                                                                                                                                                                          | 3.0 (2.3 to 3.7)           | 2.7 (2.2 to 3.4)           | 2.7 (2.1 to 3.4)           | 2.5 (2.0 to 3.1)           | -0.6 (-0.9 to -0.3)                            | -9.0 (-12.9 to -4.9)                |
| Slovenia                                                                                                                                                                          | 3.4 (2.7 to 4.2)           | 2.8 (2.3 to 3.5)           | 2.8 (2.2 to 3.5)           | 2.7 (2.1 to 3.3)           | -0.4 (-0.7 to -0.2)                            | -6.5 (-10.6 to -2.4)                |
| <b>Eastern Europe</b>                                                                                                                                                             |                            |                            |                            |                            |                                                |                                     |
| Belarus                                                                                                                                                                           | 11.8 (9.3 to 14.4)         | 6.1 (4.8 to 7.5)           | 6.0 (4.7 to 7.5)           | 5.0 (4.0 to 6.3)           | -1.3 (-1.7 to -0.9)                            | -17.4 (-22.0 to -12.9)              |
| Estonia                                                                                                                                                                           | 7.0 (5.6 to 8.7)           | 5.5 (4.3 to 6.8)           | 5.4 (4.3 to 6.8)           | 4.8 (3.7 to 6.0)           | -0.9 (-1.2 to -0.6)                            | -13.2 (-17.1 to -9.2)               |
| Latvia                                                                                                                                                                            | 7.8 (6.2 to 9.7)           | 6.0 (4.8 to 7.5)           | 5.9 (4.7 to 7.4)           | 5.5 (4.4 to 6.8)           | -0.6 (-0.9 to -0.3)                            | -8.5 (-12.9 to -4.1)                |
| Lithuania                                                                                                                                                                         | 8.0 (6.5 to 9.8)           | 5.8 (4.7 to 7.2)           | 5.8 (4.6 to 7.2)           | 5.0 (3.9 to 6.2)           | -1.1 (-1.4 to -0.8)                            | -15.5 (-19.2 to -11.8)              |
| Moldova                                                                                                                                                                           | 28.6 (24.1 to 33.1)        | 16.3 (13.6 to 19.5)        | 15.6 (12.8 to 18.7)        | 10.8 (8.8 to 13.0)         | -2.8 (-3.1 to -2.5)                            | -34.2 (-36.9 to -31.3)              |
| Russia                                                                                                                                                                            | 8.7 (7.1 to 10.7)          | 6.8 (5.4 to 8.5)           | 6.7 (5.3 to 8.3)           | 5.9 (4.6 to 7.3)           | -1.0 (-1.3 to -0.7)                            | -14.3 (-18.0 to -10.3)              |
| Ukraine                                                                                                                                                                           | 10.9 (8.7 to 13.4)         | 10.2 (8.2 to 12.6)         | 10.0 (8.1 to 12.2)         | 8.7 (7.0 to 10.7)          | -1.1 (-1.4 to -0.8)                            | -15.0 (-18.7 to -11.5)              |
| <b>High-income</b>                                                                                                                                                                |                            |                            |                            |                            |                                                |                                     |
| <b>Australasia</b>                                                                                                                                                                |                            |                            |                            |                            |                                                |                                     |
| Australia                                                                                                                                                                         | 6.6 (5.2 to 8.2)           | 5.8 (4.5 to 7.1)           | 5.8 (4.6 to 7.2)           | 5.5 (4.3 to 6.8)           | -0.3 (-0.6 to 0.1)                             | -5.1 (-9.2 to -0.8)                 |
| New Zealand                                                                                                                                                                       | 6.6 (5.3 to 8.1)           | 6.0 (4.7 to 7.4)           | 5.9 (4.7 to 7.4)           | 5.7 (4.5 to 7.0)           | -0.4 (-0.6 to 0.1)                             | -5.1 (-9.0 to -1.1)                 |
| <b>High-income Asia Pacific</b>                                                                                                                                                   |                            |                            |                            |                            |                                                |                                     |
| Bruni                                                                                                                                                                             | 6.7 (5.3 to 8.4)           | 5.8 (4.6 to 7.2)           | 5.8 (4.6 to 7.2)           | 5.5 (4.4 to 6.8)           | -0.4 (-0.7 to 0.1)                             | -5.2 (-9.4 to -0.9)                 |
| Japan                                                                                                                                                                             | 6.5 (5.2 to 8.1)           | 5.9 (4.7 to 7.3)           | 5.8 (4.7 to 7.2)           | 5.7 (4.6 to 7.0)           | -0.2 (-0.5 to 0.1)                             | -3.1 (-7.2 to 1.2)                  |
| South Korea                                                                                                                                                                       | 6.8 (5.4 to 8.4)           | 5.9 (4.6 to 7.2)           | 5.8 (4.6 to 7.2)           | 5.5 (4.3 to 6.8)           | -0.4 (-0.7 to 0.1)                             | -6.3 (-10.6 to -2.1)                |
| Singapore                                                                                                                                                                         | 6.8 (5.5 to 8.5)           | 5.8 (4.6 to 7.2)           | 5.8 (4.6 to 7.2)           | 5.5 (4.3 to 6.7)           | -0.4 (-0.7 to 0.1)                             | -6.1 (-10.2 to -1.9)                |

|                                     | Estimate in 2000 (95% UIs) | Estimate in 2015 (95% UIs) | Estimate in 2017 (95% UIs) | Estimate in 2020 (95% UIs) | Annualised rate of change, 2015-2020 (95% UIs) | Percent change, 2015-2020 (95% UIs) |
|-------------------------------------|----------------------------|----------------------------|----------------------------|----------------------------|------------------------------------------------|-------------------------------------|
| <b>High-income North America</b>    |                            |                            |                            |                            |                                                |                                     |
| Canada                              | 3.2 (2.5 to 4.0)           | 3.0 (2.4 to 3.7)           | 3.0 (2.4 to 3.7)           | 2.9 (2.3 to 3.6)           | -0.2 (-0.5 to 0.1)                             | -2.7 (-7.3 to 1.7)                  |
| Greenland                           | 3.7 (2.9 to 4.6)           | 3.2 (2.5 to 4.1)           | 3.2 (2.5 to 4.0)           | 3.1 (2.4 to 3.9)           | -0.3 (-0.7 to 0.0)                             | -4.6 (-9.4 to 0.2)                  |
| United States                       | 3.5 (2.8 to 4.4)           | 3.0 (2.4 to 3.8)           | 3.0 (2.4 to 3.8)           | 2.9 (2.3 to 3.7)           | -0.2 (-0.5 to 0.0)                             | -3.5 (-7.6 to 0.5)                  |
| <b>Southern Latin America</b>       |                            |                            |                            |                            |                                                |                                     |
| Argentina                           | 13.5 (11.0 to 16.4)        | 8.7 (6.8 to 10.6)          | 8.5 (6.8 to 10.3)          | 7.0 (5.5 to 8.5)           | -1.5 (-1.8 to -1.1)                            | -19.6 (-23.8 to -15.6)              |
| Chile                               | 9.7 (7.8 to 11.9)          | 7.3 (5.9 to 9.0)           | 7.2 (5.8 to 8.9)           | 6.3 (5.0 to 7.7)           | -1.0 (-1.3 to -0.7)                            | -13.8 (-17.7 to -10.0)              |
| Uruguay                             | 9.1 (7.3 to 11.2)          | 7.3 (5.9 to 9.1)           | 7.1 (5.6 to 8.9)           | 6.0 (4.7 to 7.5)           | -1.2 (-1.5 to -0.9)                            | -17.0 (-20.4 to -13.3)              |
| <b>Western Europe</b>               |                            |                            |                            |                            |                                                |                                     |
| Andorra                             | 3.1 (2.5 to 3.9)           | 3.0 (2.4 to 3.8)           | 3.0 (2.4 to 3.7)           | 2.9 (2.3 to 3.6)           | -0.2 (-0.5 to 0.1)                             | -2.6 (-6.8 to 1.7)                  |
| Austria                             | 3.4 (2.7 to 4.2)           | 3.2 (2.6 to 4.0)           | 3.2 (2.5 to 4.0)           | 3.1 (2.5 to 3.9)           | -0.2 (-0.6 to 0.1)                             | -3.5 (-8.0 to 1.3)                  |
| Belgium                             | 3.1 (2.5 to 3.9)           | 3.0 (2.4 to 3.8)           | 3.0 (2.4 to 3.7)           | 2.9 (2.4 to 3.6)           | -0.2 (-0.5 to 0.1)                             | -3.2 (-7.5 to 1.6)                  |
| Cyprus                              | 3.5 (2.8 to 4.4)           | 3.1 (2.4 to 3.8)           | 3.1 (2.4 to 3.8)           | 3.0 (2.4 to 3.7)           | -0.2 (-0.5 to 0.1)                             | -3.1 (-7.1 to 1.2)                  |
| Denmark                             | 3.1 (2.4 to 3.9)           | 3.0 (2.4 to 3.7)           | 3.0 (2.3 to 3.7)           | 2.9 (2.3 to 3.6)           | -0.2 (-0.5 to 0.1)                             | -3.2 (-7.5 to 1.4)                  |
| Finland                             | 3.1 (2.5 to 3.9)           | 3.0 (2.4 to 3.8)           | 3.0 (2.4 to 3.8)           | 2.9 (2.3 to 3.7)           | -0.2 (-0.6 to 0.1)                             | -3.6 (-8.2 to 0.8)                  |
| France                              | 3.2 (2.5 to 4.1)           | 3.1 (2.5 to 3.9)           | 3.1 (2.5 to 4.0)           | 3.1 (2.4 to 3.9)           | -0.2 (-0.5 to 0.1)                             | -3.0 (-7.1 to 1.3)                  |
| Germany                             | 3.1 (2.5 to 4.0)           | 3.1 (2.5 to 3.8)           | 3.0 (2.4 to 3.8)           | 3.0 (2.4 to 3.7)           | -0.2 (-0.5 to 0.1)                             | -3.2 (-7.6 to 0.9)                  |
| Greece                              | 3.1 (2.5 to 3.9)           | 3.0 (2.4 to 3.8)           | 3.0 (2.4 to 3.8)           | 3.0 (2.4 to 3.7)           | -0.2 (-0.5 to 0.1)                             | -2.5 (-6.9 to 2.1)                  |
| Iceland                             | 3.1 (2.5 to 3.9)           | 3.0 (2.4 to 3.8)           | 3.0 (2.4 to 3.8)           | 2.9 (2.3 to 3.6)           | -0.3 (-0.6 to 0.0)                             | -4.2 (-8.4 to 0.4)                  |
| Ireland                             | 3.2 (2.5 to 4.0)           | 3.0 (2.4 to 3.8)           | 3.0 (2.4 to 3.8)           | 2.9 (2.3 to 3.6)           | -0.3 (-0.6 to 0.0)                             | -4.4 (-9.0 to -0.1)                 |
| Israel                              | 3.2 (2.6 to 4.0)           | 3.2 (2.5 to 3.9)           | 3.1 (2.5 to 3.9)           | 3.1 (2.4 to 3.8)           | -0.2 (-0.5 to 0.1)                             | -3.1 (-7.5 to 1.2)                  |
| Italy                               | 3.6 (2.9 to 4.4)           | 3.4 (2.7 to 4.3)           | 3.4 (2.7 to 4.3)           | 3.3 (2.6 to 4.2)           | -0.2 (-0.5 to 0.1)                             | -3.2 (-7.6 to 1.0)                  |
| Luxembourg                          | 3.1 (2.4 to 3.8)           | 3.0 (2.4 to 3.8)           | 3.0 (2.4 to 3.7)           | 2.9 (2.3 to 3.6)           | -0.2 (-0.5 to 0.1)                             | -2.9 (-7.0 to 1.6)                  |
| Malta                               | 3.2 (2.6 to 4.0)           | 3.1 (2.5 to 3.9)           | 3.1 (2.5 to 3.9)           | 3.0 (2.4 to 3.8)           | -0.3 (-0.6 to 0.0)                             | -4.3 (-8.7 to 0.1)                  |
| Netherlands                         | 3.1 (2.4 to 3.8)           | 3.0 (2.3 to 3.7)           | 3.0 (2.3 to 3.7)           | 2.9 (2.2 to 3.6)           | -0.2 (-0.5 to 0.1)                             | -3.3 (-7.3 to 1.3)                  |
| Norway                              | 3.1 (2.5 to 3.9)           | 3.0 (2.4 to 3.8)           | 3.0 (2.3 to 3.8)           | 2.9 (2.3 to 3.6)           | -0.2 (-0.5 to 0.1)                             | -3.5 (-7.6 to 0.8)                  |
| Portugal                            | 3.7 (2.9 to 4.5)           | 3.4 (2.7 to 4.2)           | 3.4 (2.7 to 4.2)           | 3.2 (2.6 to 4.0)           | -0.4 (-0.7 to -0.1)                            | -5.3 (-9.3 to -1.0)                 |
| Spain                               | 3.2 (2.5 to 4.0)           | 3.1 (2.5 to 3.9)           | 3.1 (2.5 to 3.9)           | 3.0 (2.4 to 3.8)           | -0.2 (-0.5 to 0.1)                             | -2.8 (-7.1 to 2.0)                  |
| Sweden                              | 3.1 (2.5 to 3.9)           | 3.1 (2.4 to 3.8)           | 3.1 (2.4 to 3.8)           | 3.0 (2.3 to 3.7)           | -0.2 (-0.5 to 0.1)                             | -2.9 (-7.1 to 1.6)                  |
| Switzerland                         | 3.1 (2.5 to 3.8)           | 3.0 (2.4 to 3.8)           | 3.0 (2.4 to 3.8)           | 2.9 (2.3 to 3.6)           | -0.2 (-0.5 to 0.1)                             | -3.1 (-7.2 to 1.2)                  |
| United Kingdom                      | 3.3 (2.6 to 4.1)           | 3.1 (2.4 to 3.9)           | 3.1 (2.4 to 3.9)           | 3.0 (2.3 to 3.8)           | -0.3 (-0.6 to 0.0)                             | -3.9 (-8.2 to 0.3)                  |
| <b>Latin America and Caribbean</b>  |                            |                            |                            |                            |                                                |                                     |
| <b>Andean Latin America</b>         |                            |                            |                            |                            |                                                |                                     |
| Bolivia                             | 38.1 (33.0 to 44.1)        | 24.9 (20.8 to 29.4)        | 23.9 (19.8 to 28.3)        | 18.6 (15.2 to 22.3)        | -2.0 (-2.2 to -1.7)                            | -25.5 (-28.4 to -22.4)              |
| Ecuador                             | 27.4 (22.9 to 32.3)        | 23.7 (20.0 to 28.1)        | 23.3 (19.5 to 27.9)        | 20.1 (16.6 to 24.2)        | -1.1 (-1.4 to -0.8)                            | -15.5 (-18.9 to -11.8)              |
| Peru                                | 33.0 (27.7 to 38.5)        | 25.2 (20.9 to 29.9)        | 24.6 (20.3 to 29.4)        | 18.8 (15.3 to 22.6)        | -2.0 (-2.2 to -1.7)                            | -25.6 (-28.5 to -22.6)              |
| <b>Caribbean</b>                    |                            |                            |                            |                            |                                                |                                     |
| Antigua and Barbuda                 | 28.0 (23.4 to 32.9)        | 26.1 (21.9 to 30.7)        | 25.6 (21.6 to 30.1)        | 22.5 (18.8 to 26.7)        | -1.0 (-1.2 to -0.8)                            | -13.8 (-16.9 to -10.6)              |
| The Bahamas                         | 21.3 (17.4 to 25.4)        | 21.3 (17.6 to 25.2)        | 21.3 (17.6 to 25.2)        | 20.7 (17.6 to 24.6)        | -0.2 (-0.4 to 0.1)                             | -2.9 (-6.2 to 0.7)                  |
| Barbados                            | 26.7 (22.6 to 31.2)        | 25.1 (21.6 to 28.9)        | 24.9 (21.4 to 28.9)        | 24.4 (20.9 to 28.4)        | -0.2 (-0.4 to 0.0)                             | -2.8 (-6.4 to 0.7)                  |
| Belize                              | 26.3 (22.3 to 30.6)        | 33.0 (28.5 to 37.6)        | 31.8 (27.4 to 36.3)        | 27.5 (23.4 to 31.9)        | -1.2 (-1.5 to -0.9)                            | -16.7 (-19.9 to -13.3)              |
| Bermuda                             | 20.0 (16.3 to 23.7)        | 19.4 (16.0 to 22.3)        | 19.3 (16.1 to 22.3)        | 18.4 (15.2 to 22.3)        | -0.4 (-0.6 to -0.1)                            | -5.2 (-8.6 to -1.8)                 |
| Cuba                                | 28.3 (23.7 to 33.1)        | 20.7 (17.4 to 24.3)        | 19.9 (16.7 to 23.4)        | 15.7 (13.1 to 18.6)        | -1.9 (-2.1 to -1.6)                            | -24.2 (-27.6 to -21.2)              |
| Dominica                            | 34.8 (29.1 to 40.1)        | 29.3 (24.4 to 34.3)        | 28.8 (23.9 to 33.5)        | 24.3 (19.9 to 28.5)        | -1.3 (-1.5 to -1.0)                            | -17.3 (-20.3 to -14.4)              |
| Dominican Republic                  | 67.1 (61.8 to 72.0)        | 64.2 (59.7 to 68.5)        | 63.2 (58.6 to 67.6)        | 58.5 (53.6 to 63.1)        | -0.6 (-0.8 to -0.4)                            | -8.9 (-11.6 to -6.3)                |
| Grenada                             | 31.1 (26.3 to 36.1)        | 27.8 (23.4 to 32.6)        | 27.1 (22.8 to 31.9)        | 23.1 (19.2 to 27.5)        | -1.2 (-1.5 to -1.0)                            | -16.9 (-20.1 to -13.5)              |
| Guyana                              | 43.1 (37.8 to 48.1)        | 57.3 (53.8 to 60.8)        | 55.3 (51.6 to 59.1)        | 47.8 (43.8 to 52.1)        | -1.2 (-1.5 to -1.0)                            | -16.6 (-19.6 to -13.4)              |
| Haiti                               | 78.4 (74.9 to 81.9)        | 77.3 (74.1 to 80.6)        | 76.7 (73.1 to 80.4)        | 75.0 (71.3 to 78.9)        | -0.2 (-0.3 to -0.1)                            | -3.0 (-4.3 to -1.7)                 |
| Jamaica                             | 46.8 (41.2 to 52.0)        | 44.3 (40.1 to 48.4)        | 43.5 (39.1 to 48.0)        | 39.5 (35.2 to 44.0)        | -0.8 (-1.0 to -0.6)                            | -11.0 (-13.6 to -8.4)               |
| Puerto Rico                         | 20.6 (16.9 to 24.5)        | 18.9 (15.5 to 22.5)        | 18.8 (15.3 to 22.4)        | 18.4 (15.0 to 21.9)        | -0.2 (-0.4 to 0.1)                             | -2.7 (-6.3 to 1.0)                  |
| Saint Lucia                         | 20.8 (17.2 to 24.4)        | 18.9 (16.1 to 22.1)        | 18.6 (15.8 to 21.9)        | 17.1 (14.8 to 20.1)        | -0.7 (-0.9 to -0.4)                            | -9.6 (-13.2 to -6.2)                |
| Saint Vincent and the Grenadines    | 36.9 (31.8 to 42.9)        | 34.3 (29.2 to 39.9)        | 33.6 (28.5 to 38.9)        | 29.5 (24.8 to 34.5)        | -1.0 (-1.2 to -0.8)                            | -14.1 (-17.1 to -11.3)              |
| Suriname                            | 39.3 (34.1 to 44.1)        | 34.6 (30.9 to 38.5)        | 34.3 (30.4 to 38.4)        | 28.6 (25.1 to 32.4)        | -1.3 (-1.5 to -1.1)                            | -17.5 (-20.4 to -14.7)              |
| Trinidad and Tobago                 | 26.7 (22.2 to 31.7)        | 24.5 (20.5 to 28.7)        | 24.5 (20.5 to 28.9)        | 23.3 (19.4 to 27.6)        | -0.3 (-0.6 to -0.1)                            | -4.9 (-8.8 to -1.1)                 |
| Virgin Islands, U.S.                | 21.9 (18.3 to 25.8)        | 20.8 (17.0 to 24.8)        | 20.8 (17.1 to 24.7)        | 20.3 (16.7 to 24.1)        | -0.2 (-0.4 to 0.1)                             | -2.6 (-6.1 to 1.0)                  |
| <b>Central Latin America</b>        |                            |                            |                            |                            |                                                |                                     |
| Colombia                            | 24.3 (20.3 to 29.0)        | 18.7 (15.3 to 22.5)        | 18.1 (14.9 to 21.7)        | 13.9 (11.2 to 16.8)        | -2.0 (-2.3 to -1.7)                            | -26.0 (-28.9 to -23.0)              |
| Costa Rica                          | 28.1 (24.3 to 32.1)        | 24.2 (21.1 to 27.6)        | 23.3 (20.2 to 26.6)        | 20.6 (17.8 to 23.7)        | -1.1 (-1.3 to -0.8)                            | -14.7 (-18.0 to -11.6)              |
| El Salvador                         | 30.2 (25.8 to 35.4)        | 24.6 (20.3 to 29.1)        | 23.8 (19.6 to 28.4)        | 18.8 (15.3 to 22.6)        | -1.8 (-2.1 to -1.5)                            | -23.8 (-26.7 to -20.6)              |
| Guatemala                           | 37.9 (32.4 to 43.0)        | 33.0 (28.1 to 38.3)        | 31.8 (27.2 to 36.8)        | 25.2 (21.3 to 29.7)        | -1.8 (-2.1 to -1.6)                            | -23.6 (-26.7 to -20.8)              |
| Honduras                            | 21.7 (18.2 to 25.4)        | 19.3 (16.5 to 22.4)        | 18.4 (15.4 to 21.6)        | 14.8 (12.3 to 17.5)        | -1.8 (-2.0 to -1.5)                            | -23.2 (-26.5 to -19.9)              |
| Mexico                              | 17.7 (14.6 to 21.5)        | 15.8 (12.8 to 18.9)        | 15.7 (12.8 to 18.8)        | 14.0 (11.3 to 16.9)        | -0.8 (-1.1 to -0.5)                            | -11.4 (-14.9 to -7.8)               |
| Nicaragua                           | 36.9 (31.5 to 42.6)        | 27.4 (22.8 to 32.2)        | 26.1 (21.6 to 30.8)        | 18.9 (15.5 to 22.8)        | -2.5 (-2.7 to -2.2)                            | -30.8 (-33.6 to -27.8)              |
| Panama                              | 30.4 (25.8 to 35.5)        | 21.9 (18.1 to 26.3)        | 20.5 (16.8 to 24.6)        | 17.1 (13.9 to 20.6)        | -1.6 (-1.9 to -1.4)                            | -21.8 (-24.9 to -18.9)              |
| Venezuela                           | 19.5 (15.9 to 23.6)        | 16.8 (13.8 to 20.2)        | 16.6 (13.5 to 19.9)        | 14.3 (11.6 to 17.3)        | -1.1 (-1.3 to -0.8)                            | -14.8 (-18.3 to -11.0)              |
| <b>Tropical Latin America</b>       |                            |                            |                            |                            |                                                |                                     |
| Brazil                              | 25.4 (21.4 to 30.3)        | 19.0 (15.6 to 22.6)        | 18.6 (15.3 to 22.2)        | 15.1 (12.2 to 18.1)        | -1.5 (-1.8 to -1.2)                            | -20.3 (-23.7 to -17.1)              |
| Paraguay                            | 42.4 (36.7 to 47.7)        | 28.2 (23.6 to 33.0)        | 27.4 (22.8 to 32.0)        | 22.3 (18.3 to 26.6)        | -1.6 (-1.9 to -1.3)                            | -21.0 (-24.7 to -17.2)              |
| <b>North Africa and Middle East</b> |                            |                            |                            |                            |                                                |                                     |
| <b>North Africa and Middle East</b> |                            |                            |                            |                            |                                                |                                     |
| Afghanistan                         | 62.7 (58.0 to 67.5)        | 58.1 (53.9 to 62.1)        | 57.4 (52.9 to 61.7)        | 55.0 (50.6 to 59.5)        | -0.4 (-0.5 to -0.2)                            | -5.2 (-7.2 to -3.3)                 |
| Algeria                             | 22.1 (18.6 to 25.9)        | 16.9 (14.4 to 19.7)        | 16.4 (13.9 to 19.2)        | 12.1 (10.2 to 14.3)        | -2.2 (-2.5 to -1.9)                            | -28.1 (-31.2 to -24.9)              |
| Bahrain                             | 14.9 (12.1 to 17.8)        | 14.9 (12.0 to 17.9)        | 14.7 (11.8 to 17.7)        | 13.1 (10.3 to 15.8)        | -0.9 (-1.2 to -0.6)                            | -12.4 (-16.2 to -8.2)               |
| Egypt                               | 18.7 (15.4 to 22.5)        | 13.7 (11.3 to 16.2)        | 13.3 (11.0 to 15.8)        | 12.0 (9.9 to 14.3)         | -0.9 (-1.2 to -0.6)                            | -12.3 (-16.0 to -8.5)               |
| Iran                                | 16.2 (13.4 to 19.5)        | 14.3 (11.8 to 17.7)        | 14.1 (11.6 to 17.5)        | 13.3 (10.9 to 16.6)        | -0.5 (-0.7 to -0.2)                            | -6.9 (-10.5 to -3.3)                |
| Iraq                                | 11.0 (9.0 to 13.5)         | 9.9 (7.9 to 12.0)          | 9.5 (7.6 to 11.6)          | 7.2 (5.7 to 8.9)           | -2.1 (-2.5 to -1.6)                            | -26.8 (-31.5 to -21.5)              |
| Jordan                              | 20.6 (16.6 to 24.6)        | 18.0 (14.8 to 21.5)        | 17.3 (14.2 to 20.6)        | 15.2 (12.5 to 18.2)        | -1.1 (-1.4 to -0.9)                            | -15.4 (-18.7 to -12.0)              |
| Kuwait                              | 14.1 (11.5 to 17.1)        | 12.7 (10.2 to 15.4)        | 12.4 (10.1 to 15.3)        | 10.9 (8.8 to 13.4)         | -1.0 (-1.3 to -0.7)                            | -14.0 (-17.7 to -10.1)              |
| Lebanon                             | 22.3 (18.4 to 26.5)        | 17.6 (14.4 to 21.3)        | 16.8 (13.8 to 20.4)        | 11.8 (9.6 to 14.5)         | -2.6 (-2.9 to -2.3)                            | -32.7 (-35.5 to -29.7)              |
| Libya                               | 24.3 (20.3 to 28.8)        | 23.1 (19.2 to 27.5)        | 23.1 (19.2 to 27.5)        | 21.5 (17.2 to 25.7)        | -0.5 (-0.8 to -0.2)                            | -6.8 (-10.7 to -2.7)                |

|                                               | Estimate in 2000 (95% UIs) | Estimate in 2015 (95% UIs) | Estimate in 2017 (95% UIs) | Estimate in 2020 (95% UIs) | Annualised rate of change, 2015-2020 (95% UIs) | Percent change, 2015-2020 (95% UIs) |
|-----------------------------------------------|----------------------------|----------------------------|----------------------------|----------------------------|------------------------------------------------|-------------------------------------|
| Morocco                                       | 38.2 (32.8 to 44.1)        | 37.0 (22.7 to 32.0)        | 26.7 (21.6 to 30.5)        | 18.7 (15.4 to 22.5)        | -2.5 (-2.7 to -2.2)                            | -30.9 (-33.5 to -27.9)              |
| Palestine                                     | 33.2 (28.1 to 38.7)        | 28.1 (23.3 to 32.9)        | 26.6 (22.1 to 31.5)        | 21.7 (17.9 to 26.0)        | -1.7 (-2.1 to -1.3)                            | -22.6 (-26.7 to -17.7)              |
| Oman                                          | 29.6 (24.8 to 34.6)        | 16.2 (13.2 to 19.5)        | 15.8 (12.8 to 19.1)        | 11.2 (9.0 to 13.7)         | -2.5 (-2.8 to -2.2)                            | -30.9 (-34.0 to -27.8)              |
| Qatar                                         | 13.5 (10.9 to 16.4)        | 13.5 (10.9 to 16.4)        | 13.3 (10.7 to 16.0)        | 12.2 (9.8 to 14.8)         | -0.7 (-0.9 to -0.4)                            | -9.7 (-13.1 to -6.1)                |
| Saudi Arabia                                  | 25.1 (21.0 to 29.8)        | 16.7 (13.7 to 20.1)        | 15.8 (12.9 to 19.0)        | 10.9 (8.8 to 13.2)         | -2.9 (-3.1 to -2.6)                            | -34.9 (-37.6 to -32.3)              |
| Sudan                                         | 77.9 (73.9 to 81.4)        | 75.0 (71.6 to 78.3)        | 72.6 (69.0 to 76.3)        | 64.1 (60.0 to 68.5)        | -1.1 (-1.2 to -0.9)                            | -14.7 (-16.9 to -12.3)              |
| Syria                                         | 19.7 (16.2 to 23.4)        | 16.8 (13.8 to 20.1)        | 16.4 (13.4 to 19.6)        | 13.6 (11.1 to 16.4)        | -1.4 (-1.7 to -1.1)                            | -18.9 (-22.0 to -15.7)              |
| Tunisia                                       | 24.2 (20.5 to 28.1)        | 20.2 (17.4 to 23.3)        | 19.6 (16.8 to 22.6)        | 14.9 (12.5 to 17.6)        | -2.1 (-2.5 to -1.6)                            | -26.6 (-30.9 to -21.8)              |
| Turkey                                        | 26.9 (22.5 to 32.2)        | 18.2 (15.0 to 22.1)        | 17.2 (14.0 to 20.9)        | 12.0 (9.7 to 14.8)         | -2.8 (-3.1 to -2.5)                            | -34.2 (-37.2 to -31.4)              |
| United Arab Emirates                          | 14.9 (12.2 to 18.3)        | 13.8 (11.3 to 16.8)        | 13.8 (11.2 to 16.6)        | 11.8 (9.6 to 14.3)         | -1.1 (-1.4 to -0.8)                            | -15.1 (-18.4 to -11.5)              |
| Yemen                                         | 63.1 (58.2 to 68.1)        | 51.5 (47.9 to 55.3)        | 50.4 (46.6 to 54.3)        | 43.0 (39.0 to 46.9)        | -1.2 (-1.5 to -1.0)                            | -16.6 (-19.7 to -13.7)              |
| <b>South Asia</b>                             |                            |                            |                            |                            |                                                |                                     |
| <b>South Asia</b>                             |                            |                            |                            |                            |                                                |                                     |
| Bangladesh                                    | 76.0 (71.8 to 79.7)        | 72.7 (69.2 to 75.9)        | 72.0 (68.3 to 75.6)        | 68.2 (64.3 to 72.2)        | -0.4 (-0.5 to -0.3)                            | -6.1 (-7.8 to -4.4)                 |
| Bhutan                                        | 35.6 (30.9 to 40.5)        | 19.6 (16.7 to 22.8)        | 18.6 (15.7 to 21.9)        | 17.6 (14.8 to 20.6)        | -0.7 (-1.0 to -0.5)                            | -10.3 (-13.6 to -6.9)               |
| India                                         | 55.7 (49.8 to 61.6)        | 45.6 (39.6 to 51.2)        | 44.1 (38.3 to 49.8)        | 34.3 (29.0 to 39.5)        | -1.9 (-2.2 to -1.6)                            | -24.9 (-27.9 to -21.9)              |
| Nepal                                         | 57.9 (52.8 to 62.8)        | 43.2 (40.0 to 46.3)        | 41.5 (38.1 to 45.0)        | 32.1 (29.0 to 35.3)        | -2.0 (-2.3 to -1.7)                            | -25.8 (-28.8 to -22.8)              |
| Pakistan                                      | 51.4 (46.2 to 56.4)        | 44.7 (40.7 to 48.9)        | 43.1 (38.9 to 47.4)        | 37.1 (33.2 to 41.3)        | -1.2 (-1.5 to -1.0)                            | -16.9 (-20.3 to -13.5)              |
| <b>Southeast Asia, East Asia, and Oceania</b> |                            |                            |                            |                            |                                                |                                     |
| <b>East Asia</b>                              |                            |                            |                            |                            |                                                |                                     |
| China                                         | 27.1 (26.1 to 28.1)        | 15.1 (14.4 to 15.8)        | 13.8 (13.2 to 14.4)        | 9.4 (9.0 to 9.9)           | -3.1 (-3.2 to -3.1)                            | -37.5 (-38.1 to -36.9)              |
| North Korea                                   | 10.2 (8.2 to 12.5)         | 9.3 (7.5 to 11.3)          | 9.2 (7.3 to 11.1)          | 8.3 (6.7 to 10.1)          | -0.8 (-1.0 to -0.5)                            | -10.7 (-14.4 to -6.6)               |
| Taiwan (Province of China)                    | 7.5 (6.0 to 9.4)           | 5.9 (4.7 to 7.3)           | 5.8 (4.6 to 7.2)           | 5.3 (4.2 to 6.7)           | -0.6 (-0.9 to -0.4)                            | -9.2 (-12.9 to -5.2)                |
| <b>Oceania</b>                                |                            |                            |                            |                            |                                                |                                     |
| American Samoa                                | 11.6 (9.3 to 14.3)         | 8.3 (6.6 to 10.3)          | 8.2 (6.5 to 10.1)          | 7.1 (5.6 to 8.8)           | -1.1 (-1.4 to -0.8)                            | -15.0 (-18.8 to -11.2)              |
| Federated States of Micronesia                | 20.2 (16.7 to 24.0)        | 14.3 (11.5 to 17.5)        | 13.9 (11.2 to 16.9)        | 11.7 (9.4 to 14.4)         | -1.3 (-1.6 to -1.0)                            | -17.9 (-21.6 to -14.0)              |
| Fiji                                          | 17.6 (14.3 to 21.2)        | 11.6 (9.1 to 14.1)         | 11.2 (8.8 to 13.5)         | 9.6 (7.6 to 11.7)          | -1.2 (-1.5 to -1.0)                            | -17.0 (-20.5 to -13.4)              |
| Guam                                          | 7.3 (5.9 to 9.1)           | 6.2 (5.0 to 7.7)           | 6.0 (4.8 to 7.7)           | 6.0 (4.8 to 7.7)           | -0.2 (-0.5 to 0.0)                             | -3.7 (-7.9 to 0.6)                  |
| Kiribati                                      | 32.2 (27.2 to 37.2)        | 24.2 (20.2 to 28.8)        | 23.2 (19.2 to 27.5)        | 17.6 (14.4 to 21.2)        | -2.1 (-2.4 to -1.9)                            | -27.3 (-30.2 to -24.7)              |
| Marshall Islands                              | 25.8 (21.8 to 30.7)        | 16.2 (13.2 to 19.7)        | 15.6 (12.7 to 19.1)        | 11.8 (9.4 to 14.5)         | -2.1 (-2.4 to -1.8)                            | -27.3 (-30.4 to -24.2)              |
| Northern Mariana Islands                      | 7.3 (5.7 to 9.1)           | 6.9 (5.3 to 8.6)           | 6.9 (5.3 to 8.6)           | 6.6 (5.3 to 8.3)           | -0.3 (-0.5 to 0.0)                             | -3.8 (-7.9 to 0.4)                  |
| Papua New Guinea                              | 50.3 (44.9 to 56.3)        | 43.4 (37.6 to 49.2)        | 42.5 (36.7 to 48.3)        | 35.8 (30.4 to 41.4)        | -1.3 (-1.5 to -1.0)                            | -17.5 (-20.4 to -14.5)              |
| Samoa                                         | 10.5 (8.4 to 12.9)         | 7.9 (6.2 to 9.8)           | 7.8 (6.1 to 9.6)           | 6.5 (5.1 to 8.1)           | -1.3 (-1.6 to -1.0)                            | -17.5 (-21.0 to -14.0)              |
| Solomon Islands                               | 25.4 (21.2 to 29.8)        | 20.4 (16.6 to 24.5)        | 19.7 (16.0 to 23.7)        | 14.3 (11.4 to 17.4)        | -2.4 (-2.7 to -2.1)                            | -30.1 (-32.9 to -27.2)              |
| Tonga                                         | 16.6 (13.4 to 20.1)        | 11.7 (9.4 to 14.2)         | 11.3 (9.1 to 13.7)         | 8.3 (6.7 to 10.1)          | -2.3 (-2.5 to -2.0)                            | -28.7 (-31.7 to -25.6)              |
| Vanuatu                                       | 42.9 (37.1 to 48.9)        | 37.8 (32.8 to 43.8)        | 37.0 (31.8 to 42.7)        | 29.8 (25.2 to 34.9)        | -1.6 (-1.9 to -1.4)                            | -21.4 (-24.4 to -18.6)              |
| <b>Southeast Asia</b>                         |                            |                            |                            |                            |                                                |                                     |
| Cambodia                                      | 50.7 (45.0 to 56.3)        | 32.3 (28.4 to 36.5)        | 32.5 (28.3 to 36.8)        | 25.4 (21.8 to 29.1)        | -1.6 (-1.9 to -1.4)                            | -21.5 (-24.5 to -18.6)              |
| Indonesia                                     | 25.4 (21.4 to 29.6)        | 26.9 (23.2 to 30.9)        | 25.9 (22.2 to 30.0)        | 22.8 (19.5 to 26.6)        | -1.1 (-1.4 to -0.8)                            | -15.4 (-18.9 to -11.6)              |
| Laos                                          | 41.8 (36.0 to 47.7)        | 39.1 (33.5 to 45.0)        | 37.5 (32.1 to 43.0)        | 31.5 (26.5 to 36.8)        | -1.4 (-1.7 to -1.1)                            | -19.5 (-23.1 to -15.8)              |
| Malaysia                                      | 6.6 (5.3 to 8.2)           | 7.0 (5.7 to 8.7)           | 6.8 (5.4 to 8.4)           | 6.2 (5.0 to 7.8)           | -0.7 (-1.0 to -0.4)                            | -10.3 (-13.9 to -6.3)               |
| Maldives                                      | 41.6 (35.8 to 47.4)        | 25.9 (21.6 to 30.2)        | 24.0 (20.0 to 27.9)        | 17.2 (14.1 to 20.3)        | -2.8 (-3.0 to -2.5)                            | -33.8 (-36.6 to -31.1)              |
| Mauritius                                     | 4.2 (3.3 to 5.3)           | 3.9 (3.1 to 4.9)           | 3.8 (3.0 to 4.8)           | 3.7 (2.9 to 4.7)           | -0.3 (-0.6 to 0.0)                             | -4.1 (-8.4 to 0.0)                  |
| Myanmar                                       | 46.1 (40.5 to 52.2)        | 42.0 (36.1 to 48.2)        | 40.9 (34.9 to 46.8)        | 34.5 (28.9 to 40.1)        | -1.3 (-1.6 to -1.1)                            | -18.0 (-21.2 to -14.9)              |
| Philippines                                   | 25.5 (21.0 to 30.3)        | 25.2 (21.0 to 29.9)        | 23.9 (19.9 to 28.7)        | 18.0 (14.8 to 21.9)        | -2.2 (-2.6 to -1.9)                            | -28.5 (-32.3 to -24.6)              |
| Sri Lanka                                     | 27.5 (22.8 to 32.6)        | 18.0 (14.5 to 21.9)        | 16.9 (13.7 to 20.6)        | 11.7 (9.4 to 14.5)         | -2.9 (-3.2 to -2.6)                            | -34.9 (-37.7 to -31.9)              |
| Seychelles                                    | 16.8 (13.5 to 20.2)        | 15.2 (12.3 to 18.3)        | 14.4 (11.6 to 17.4)        | 12.4 (10.0 to 15.1)        | -1.3 (-1.6 to -1.0)                            | -18.2 (-21.8 to -14.2)              |
| Thailand                                      | 31.8 (26.9 to 37.3)        | 28.2 (23.6 to 33.3)        | 26.6 (22.1 to 31.5)        | 22.3 (18.3 to 26.6)        | -1.6 (-1.9 to -1.3)                            | -21.1 (-24.7 to -17.6)              |
| Timor-Leste                                   | 25.7 (21.3 to 30.4)        | 26.6 (22.2 to 31.2)        | 26.6 (22.1 to 31.2)        | 19.8 (16.2 to 23.8)        | -2.0 (-2.3 to -1.6)                            | -25.6 (-29.3 to -21.5)              |
| Vietnam                                       | 42.6 (37.6 to 47.6)        | 38.9 (35.0 to 43.3)        | 36.9 (32.9 to 41.4)        | 31.5 (27.7 to 35.8)        | -1.4 (-1.7 to -1.1)                            | -19.0 (-22.1 to -15.6)              |
| <b>Sub-Saharan Africa</b>                     |                            |                            |                            |                            |                                                |                                     |
| <b>Central Sub-Saharan Africa</b>             |                            |                            |                            |                            |                                                |                                     |
| Angola                                        | 93.3 (91.7 to 94.7)        | 91.7 (89.9 to 93.3)        | 91.1 (89.2 to 92.9)        | 87.5 (84.9 to 89.9)        | -0.3 (-0.4 to -0.2)                            | -4.6 (-5.7 to -3.6)                 |
| Central African Republic                      | 87.5 (84.9 to 89.8)        | 87.1 (84.7 to 89.3)        | 87.1 (84.6 to 89.3)        | 86.7 (84.2 to 89.1)        | -0.0 (-0.1 to 0.0)                             | -0.4 (-1.0 to 0.2)                  |
| Congo                                         | 89.2 (86.8 to 91.2)        | 84.8 (81.7 to 87.8)        | 83.8 (80.4 to 87.0)        | 78.9 (74.6 to 82.9)        | -0.5 (-0.6 to -0.4)                            | -7.0 (-8.9 to -5.4)                 |
| Democratic Republic of the Congo              | 96.0 (95.0 to 96.8)        | 95.8 (94.9 to 96.7)        | 95.6 (94.6 to 96.5)        | 94.2 (92.9 to 95.5)        | -0.1 (-0.1 to -0.1)                            | -1.7 (-2.2 to -1.2)                 |
| Equatorial Guinea                             | 92.7 (90.9 to 94.1)        | 80.1 (76.4 to 82.4)        | 78.7 (74.7 to 82.4)        | 70.6 (65.7 to 75.2)        | -0.8 (-1.0 to -0.7)                            | -11.9 (-14.1 to -9.9)               |
| Gabon                                         | 82.0 (78.0 to 85.3)        | 73.2 (68.8 to 77.6)        | 71.7 (67.2 to 75.9)        | 64.6 (59.4 to 69.5)        | -0.8 (-1.0 to -0.7)                            | -11.9 (-14.2 to -9.8)               |
| <b>Eastern Sub-Saharan Africa</b>             |                            |                            |                            |                            |                                                |                                     |
| Burundi                                       | 95.2 (94.0 to 96.2)        | 94.8 (93.5 to 95.9)        | 94.7 (93.5 to 95.9)        | 93.1 (91.5 to 94.6)        | -0.1 (-0.2 to -0.1)                            | -1.8 (-2.3 to -1.3)                 |
| Comoros                                       | 90.5 (88.5 to 92.3)        | 85.6 (82.9 to 88.1)        | 85.2 (82.4 to 87.8)        | 79.0 (75.4 to 82.4)        | -0.5 (-0.7 to -0.4)                            | -7.7 (-9.3 to -6.2)                 |
| Dibouti                                       | 91.5 (89.6 to 93.2)        | 88.6 (86.0 to 90.8)        | 88.0 (85.2 to 90.2)        | 83.8 (80.4 to 86.8)        | -0.4 (-0.5 to -0.3)                            | -5.4 (-6.8 to -4.2)                 |
| Eritrea                                       | 94.0 (92.7 to 95.2)        | 93.0 (91.4 to 94.3)        | 92.7 (91.1 to 94.1)        | 90.2 (88.1 to 92.0)        | -0.2 (-0.3 to -0.2)                            | -3.0 (-3.8 to -2.3)                 |
| Ethiopia                                      | 97.2 (96.5 to 97.8)        | 95.6 (94.7 to 96.5)        | 95.3 (94.3 to 96.2)        | 93.0 (91.6 to 94.7)        | -0.2 (-0.2 to -0.1)                            | -2.7 (-3.3 to -2.1)                 |
| Kenya                                         | 94.0 (92.7 to 95.1)        | 91.3 (89.8 to 92.5)        | 90.9 (89.2 to 92.3)        | 87.0 (84.6 to 88.9)        | -0.3 (-0.4 to -0.3)                            | -4.7 (-5.9 to -3.8)                 |
| Madagascar                                    | 90.5 (88.5 to 92.2)        | 91.8 (90.1 to 93.3)        | 91.8 (90.0 to 93.3)        | 91.4 (89.5 to 93.0)        | -0.0 (-0.1 to 0.0)                             | -0.5 (-0.9 to -0.1)                 |
| Malawi                                        | 90.8 (89.1 to 92.3)        | 92.8 (91.3 to 94.2)        | 92.7 (91.2 to 94.2)        | 91.9 (90.2 to 93.5)        | -0.1 (-0.1 to -0.0)                            | -1.0 (-1.5 to -0.5)                 |
| Mozambique                                    | 92.9 (91.3 to 94.3)        | 91.1 (89.3 to 92.7)        | 90.8 (88.9 to 92.5)        | 86.8 (84.1 to 89.1)        | -0.3 (-0.4 to -0.3)                            | -4.8 (-6.1 to -3.8)                 |
| Rwanda                                        | 97.8 (97.3 to 98.3)        | 96.7 (96.0 to 97.4)        | 96.6 (95.9 to 97.3)        | 94.9 (93.8 to 95.9)        | -0.1 (-0.2 to -0.1)                            | -1.9 (-2.4 to -1.5)                 |
| Somalia                                       | 95.0 (93.9 to 96.0)        | 93.6 (92.1 to 94.9)        | 93.5 (91.9 to 94.9)        | 91.5 (89.4 to 93.2)        | -0.2 (-0.2 to -0.1)                            | -2.3 (-3.1 to -1.7)                 |
| South Sudan                                   | 95.5 (94.4 to 96.4)        | 95.2 (94.0 to 96.2)        | 95.1 (93.9 to 96.1)        | 94.6 (93.3 to 95.7)        | -0.0 (-0.1 to 0.0)                             | -0.6 (-0.9 to -0.4)                 |
| Tanzania                                      | 94.1 (92.7 to 95.3)        | 93.0 (91.5 to 94.5)        | 92.8 (91.1 to 94.2)        | 92.0 (90.1 to 93.6)        | -0.1 (-0.1 to -0.0)                            | -1.1 (-1.5 to -0.7)                 |
| Uganda                                        | 92.7 (91.0 to 94.0)        | 89.5 (87.3 to 91.1)        | 89.2 (87.3 to 90.9)        | 85.2 (82.7 to 87.5)        | -0.3 (-0.4 to -0.3)                            | -4.8 (-5.9 to -3.8)                 |
| Zambia                                        | 90.2 (88.1 to 92.1)        | 87.4 (84.9 to 89.5)        | 86.6 (84.1 to 89.0)        | 83.7 (80.9 to 86.5)        | -0.3 (-0.4 to -0.2)                            | -4.2 (-5.4 to -3.1)                 |
| <b>Southern Sub-Saharan Africa</b>            |                            |                            |                            |                            |                                                |                                     |
| Botswana                                      | 77.3 (73.0 to 81.2)        | 66.8 (61.4 to 71.8)        | 65.0 (59.5 to 70.1)        | 56.4 (50.4 to 62.0)        | -1.1 (-1.3 to -0.9)                            | -15.7 (-18.3 to -13.2)              |
| Lesotho                                       | 97.4 (96.7 to 97.9)        | 96.3 (95.4 to 97.1)        | 96.1 (95.1 to 96.9)        | 94.5 (93.1 to 95.9)        | -0.1 (-0.2 to -0.1)                            | -2.0 (-2.5 to -1.5)                 |
| Namibia                                       | 67.1 (61.9 to 71.7)        | 53.1 (49.3 to 57.0)        | 51.4 (47.3 to 55.5)        | 41.8 (37.9 to 45.9)        | -1.6 (-1.8 to -1.4)                            | -21.2 (-23.8 to -18.6)              |
| South Africa                                  | 60.6 (55.1 to 66.2)        | 55.0 (49.7 to 60.2)        | 54.2 (48.9 to 60.2)        | 53.5 (48.9 to 59.4)        | -0.2 (-0.3 to -0.1)                            | -2.8 (-4.8 to -0.8)                 |
| Swaziland                                     | 74.3 (70.3 to 78.0)        | 63.5 (59.4 to 67.3)        | 62.4 (58.0 to 66.4)        | 53.9 (49.2 to 58.1)        | -1.1 (-1.3 to -0.9)                            | -15.2 (-17.6 to -12.8)              |

|                                                                                                                                                              | Estimate in 2000 (95% UIs) | Estimate in 2015 (95% UIs) | Estimate in 2017 (95% UIs) | Estimate in 2030 (95% UIs) | Annualised rate of change, 2015-2030 (95% UIs) | Percent change, 2015-2030 (95% UIs) |
|--------------------------------------------------------------------------------------------------------------------------------------------------------------|----------------------------|----------------------------|----------------------------|----------------------------|------------------------------------------------|-------------------------------------|
| Zimbabwe                                                                                                                                                     | 78.0 (74.2 to 81.4)        | 83.1 (80.2 to 85.4)        | 82.6 (79.5 to 85.0)        | 82.2 (79.5 to 84.7)        | -0.1 (-0.1 to -0.0)                            | -1.1 (-2.0 to -0.2)                 |
| <b>Western Sub-Saharan Africa</b>                                                                                                                            |                            |                            |                            |                            |                                                |                                     |
| Benin                                                                                                                                                        | 94.7 (93.5 to 95.8)        | 91.4 (89.6 to 93.0)        | 91.0 (89.2 to 92.8)        | 88.3 (85.9 to 90.6)        | -0.2 (-0.3 to -0.2)                            | -3.3 (-4.3 to -2.4)                 |
| Burkina Faso                                                                                                                                                 | 92.3 (90.7 to 93.7)        | 91.0 (89.1 to 92.6)        | 90.8 (89.0 to 92.5)        | 87.5 (89.0 to 89.8)        | -0.3 (-0.3 to -0.2)                            | -3.8 (-4.8 to -3.0)                 |
| Cameroun                                                                                                                                                     | 90.5 (88.3 to 92.4)        | 88.3 (85.6 to 90.7)        | 87.6 (84.8 to 90.1)        | 85.4 (82.2 to 88.2)        | -0.2 (-0.3 to -0.2)                            | -3.3 (-4.3 to -2.5)                 |
| Cape Verde                                                                                                                                                   | 86.3 (83.2 to 89.0)        | 77.0 (72.5 to 81.2)        | 76.1 (71.2 to 80.3)        | 69.7 (64.3 to 74.5)        | -0.7 (-0.8 to -0.5)                            | -9.5 (-11.8 to -7.5)                |
| Chad                                                                                                                                                         | 89.4 (87.2 to 91.1)        | 88.3 (86.3 to 90.1)        | 88.5 (86.4 to 90.3)        | 88.2 (86.4 to 90.1)        | -0.0 (-0.0 to 0.0)                             | -0.1 (-0.6 to 0.4)                  |
| Cote d'Ivoire                                                                                                                                                | 85.6 (82.6 to 88.3)        | 86.0 (82.6 to 88.3)        | 85.5 (82.7 to 88.0)        | 80.2 (76.9 to 83.6)        | -0.5 (-0.6 to -0.3)                            | -6.7 (-8.4 to -5.1)                 |
| The Gambia                                                                                                                                                   | 92.6 (90.9 to 94.1)        | 91.1 (89.3 to 92.7)        | 90.8 (88.9 to 92.5)        | 87.2 (84.5 to 89.4)        | -0.3 (-0.4 to -0.2)                            | -4.4 (-5.4 to -3.5)                 |
| Ghana                                                                                                                                                        | 90.0 (88.1 to 91.7)        | 88.4 (86.7 to 90.1)        | 88.2 (86.4 to 89.9)        | 88.0 (86.1 to 89.9)        | -0.0 (-0.1 to 0.0)                             | -0.5 (-1.1 to 0.0)                  |
| Guinea                                                                                                                                                       | 93.0 (91.4 to 94.4)        | 92.1 (90.2 to 93.6)        | 91.8 (89.2 to 93.3)        | 88.8 (86.2 to 90.9)        | -0.2 (-0.3 to -0.2)                            | -3.5 (-4.5 to -2.7)                 |
| Guinea-Bissau                                                                                                                                                | 91.9 (89.8 to 93.5)        | 91.3 (89.4 to 93.0)        | 91.0 (89.2 to 92.8)        | 89.2 (87.1 to 91.4)        | -0.2 (-0.2 to -0.1)                            | -2.2 (-3.0 to -1.6)                 |
| Liberia                                                                                                                                                      | 97.0 (96.3 to 97.6)        | 97.0 (96.3 to 97.6)        | 97.0 (96.3 to 97.6)        | 96.6 (95.8 to 97.3)        | -0.0 (-0.0 to 0.0)                             | -0.5 (-0.7 to -0.3)                 |
| Mali                                                                                                                                                         | 91.2 (89.4 to 92.8)        | 90.1 (88.1 to 91.8)        | 89.9 (87.9 to 91.6)        | 89.4 (87.4 to 91.3)        | -0.1 (-0.1 to -0.0)                            | -0.8 (-1.3 to -0.3)                 |
| Mauritania                                                                                                                                                   | 80.9 (77.5 to 84.0)        | 74.5 (71.3 to 77.6)        | 74.0 (70.5 to 77.2)        | 65.1 (60.9 to 68.8)        | -0.9 (-1.1 to -0.8)                            | -12.7 (-14.9 to -10.8)              |
| Niger                                                                                                                                                        | 89.7 (87.5 to 91.6)        | 87.3 (84.9 to 89.5)        | 87.1 (84.6 to 89.3)        | 81.8 (78.5 to 84.8)        | -0.4 (-0.5 to -0.3)                            | -6.3 (-7.7 to -5.1)                 |
| Nigeria                                                                                                                                                      | 90.2 (88.2 to 92.0)        | 88.8 (86.8 to 90.4)        | 88.6 (86.6 to 90.4)        | 87.6 (85.4 to 89.5)        | -0.1 (-0.1 to -0.1)                            | -1.4 (-2.1 to -0.8)                 |
| Sao Tome and Principe                                                                                                                                        | 83.3 (80.0 to 86.1)        | 67.3 (63.5 to 70.6)        | 65.8 (61.9 to 69.1)        | 58.9 (54.8 to 62.5)        | -0.9 (-1.1 to -0.7)                            | -12.5 (-14.6 to -10.6)              |
| Senegal                                                                                                                                                      | 69.8 (66.4 to 73.4)        | 74.8 (71.7 to 77.6)        | 75.2 (71.8 to 78.1)        | 73.7 (70.4 to 76.8)        | -0.1 (-0.2 to -0.0)                            | -1.4 (-2.8 to -0.1)                 |
| Sierra Leone                                                                                                                                                 | 91.2 (89.3 to 92.8)        | 90.2 (88.4 to 91.8)        | 90.0 (88.0 to 91.7)        | 89.7 (87.7 to 91.5)        | -0.0 (-0.1 to -0.0)                            | -0.5 (-1.0 to -0.1)                 |
| Togo                                                                                                                                                         | 90.6 (88.6 to 92.5)        | 89.9 (87.9 to 91.8)        | 89.5 (87.3 to 91.5)        | 88.2 (85.8 to 90.4)        | -0.1 (-0.2 to -0.1)                            | -1.9 (-2.6 to -1.3)                 |
| <b>Indicator 7.1.2: Risk-weighted prevalence of household air pollution, as measured by the summary exposure value (SEV) for household air pollution (%)</b> |                            |                            |                            |                            |                                                |                                     |
| <b>Central Europe, Eastern Europe, and Central Asia</b>                                                                                                      |                            |                            |                            |                            |                                                |                                     |
| <b>Central Asia</b>                                                                                                                                          |                            |                            |                            |                            |                                                |                                     |
| Armenia                                                                                                                                                      | 20.9 (14.2 to 29.1)        | 9.0 (4.5 to 14.9)          | 8.5 (4.3 to 14.1)          | 3.9 (1.9 to 6.7)           | -5.6 (-9.0 to -2.1)                            | -55.5 (-74.2 to -27.4)              |
| Azerbaijan                                                                                                                                                   | 18.6 (12.8 to 25.2)        | 10.5 (5.2 to 16.0)         | 10.1 (4.9 to 15.9)         | 6.7 (3.0 to 10.9)          | -3.0 (-6.7 to 0.3)                             | -34.1 (-63.4 to 5.0)                |
| Georgia                                                                                                                                                      | 25.9 (18.5 to 35.9)        | 20.1 (13.7 to 28.3)        | 19.3 (13.1 to 27.1)        | 11.9 (7.7 to 17.5)         | -3.5 (-5.4 to -1.5)                            | -40.0 (-55.7 to -20.7)              |
| Kazakhstan                                                                                                                                                   | 15.5 (8.9 to 21.4)         | 8.9 (4.0 to 14.5)          | 8.0 (3.5 to 13.7)          | 3.8 (1.0 to 6.8)           | -5.7 (-10.6 to -1.5)                           | -55.3 (-79.5 to -20.4)              |
| Kyrgyzstan                                                                                                                                                   | 25.2 (16.3 to 35.5)        | 18.6 (11.5 to 26.1)        | 18.1 (11.2 to 24.6)        | 10.0 (5.9 to 14.1)         | -4.2 (-6.9 to -1.6)                            | -45.9 (-64.4 to -21.1)              |
| Mongolia                                                                                                                                                     | 31.9 (21.6 to 47.0)        | 21.7 (13.7 to 32.2)        | 21.2 (13.1 to 30.9)        | 13.8 (8.2 to 20.8)         | -3.1 (-5.7 to -0.5)                            | -35.5 (-57.3 to -6.7)               |
| Tajikistan                                                                                                                                                   | 35.2 (22.6 to 52.5)        | 22.2 (13.2 to 32.2)        | 22.1 (13.2 to 31.3)        | 16.4 (9.3 to 24.2)         | -2.1 (-5.2 to 1.1)                             | -24.7 (-45.3 to -17.3)              |
| Turkmenistan                                                                                                                                                 | 0.8 (0.3 to 1.6)           | 0.2 (0.1 to 0.5)           | 0.2 (0.1 to 0.4)           | 0.2 (0.1 to 0.4)           | -2.1 (-8.7 to 4.4)                             | -15.8 (-73.0 to 92.4)               |
| Uzbekistan                                                                                                                                                   | 18.2 (10.3 to 26.0)        | 10.1 (4.3 to 16.8)         | 9.4 (4.3 to 15.9)          | 4.6 (2.0 to 8.0)           | -5.3 (-9.8 to -0.8)                            | -52.0 (-76.9 to -11.2)              |
| <b>Central Europe</b>                                                                                                                                        |                            |                            |                            |                            |                                                |                                     |
| Albania                                                                                                                                                      | 29.6 (21.5 to 41.2)        | 19.1 (13.6 to 26.8)        | 18.5 (12.6 to 25.9)        | 10.4 (6.7 to 15.0)         | -4.1 (-5.9 to -2.4)                            | -45.4 (-58.5 to -30.1)              |
| Bosnia and Herzegovina                                                                                                                                       | 27.1 (19.1 to 37.5)        | 17.7 (11.4 to 25.3)        | 17.3 (10.7 to 25.0)        | 11.2 (6.7 to 16.6)         | -3.0 (-5.4 to -0.8)                            | -35.7 (-55.8 to -11.2)              |
| Bulgaria                                                                                                                                                     | 11.8 (6.2 to 18.1)         | 8.2 (4.0 to 13.7)          | 7.8 (3.6 to 13.4)          | 5.1 (2.3 to 9.0)           | -3.2 (-6.8 to 0.8)                             | -35.2 (-64.0 to 13.2)               |
| Croatia                                                                                                                                                      | 8.9 (4.5 to 14.3)          | 5.5 (2.5 to 10.4)          | 5.2 (2.5 to 9.9)           | 3.1 (1.5 to 6.1)           | -3.7 (-8.0 to 0.6)                             | -39.5 (-69.9 to 9.2)                |
| Czech Republic                                                                                                                                               | 1.5 (0.7 to 3.1)           | 1.1 (0.5 to 2.3)           | 1.1 (0.4 to 2.3)           | 0.7 (0.3 to 1.4)           | -3.4 (-7.8 to 1.4)                             | -36.4 (-69.0 to 22.6)               |
| Hungary                                                                                                                                                      | 11.7 (6.2 to 17.6)         | 8.1 (4.0 to 13.3)          | 7.8 (3.9 to 13.1)          | 5.3 (2.6 to 9.1)           | -2.9 (-6.4 to 0.6)                             | -32.7 (-61.5 to 8.8)                |
| Macedonia                                                                                                                                                    | 19.8 (13.3 to 27.9)        | 12.2 (6.7 to 18.3)         | 11.7 (6.1 to 18.2)         | 6.5 (3.2 to 10.3)          | -4.3 (-7.5 to -1.2)                            | -46.4 (-67.6 to -16.8)              |
| Montenegro                                                                                                                                                   | 18.1 (12.1 to 24.7)        | 15.2 (9.5 to 21.7)         | 15.0 (9.5 to 21.3)         | 11.8 (7.2 to 16.9)         | -1.7 (-4.3 to 0.9)                             | -21.3 (-47.6 to 14.4)               |
| Poland                                                                                                                                                       | 7.4 (3.6 to 13.5)          | 3.9 (1.7 to 7.9)           | 3.8 (1.6 to 7.4)           | 2.1 (0.9 to 4.3)           | -4.0 (-8.3 to 0.8)                             | -41.4 (-71.4 to 13.1)               |
| Romania                                                                                                                                                      | 15.7 (10.6 to 21.2)        | 8.8 (4.7 to 13.6)          | 8.3 (4.5 to 13.2)          | 4.2 (2.2 to 6.8)           | -5.0 (-8.2 to -1.8)                            | -51.3 (-70.8 to -24.0)              |
| Serbia                                                                                                                                                       | 22.3 (15.8 to 31.4)        | 16.3 (10.1 to 23.1)        | 15.9 (9.9 to 22.9)         | 11.3 (6.8 to 16.6)         | -2.4 (-5.1 to -0.0)                            | -29.4 (-53.6 to -0.2)               |
| Slovakia                                                                                                                                                     | 2.4 (1.1 to 4.5)           | 1.6 (0.7 to 3.2)           | 1.6 (0.7 to 3.1)           | 1.1 (0.5 to 2.1)           | -2.9 (-7.0 to 1.3)                             | -31.4 (-65.2 to 22.2)               |
| Slovenia                                                                                                                                                     | 6.1 (3.0 to 11.0)          | 3.0 (1.3 to 6.0)           | 2.8 (1.2 to 5.8)           | 1.5 (0.6 to 3.1)           | -4.7 (-8.9 to -0.4)                            | -47.7 (-73.5 to -5.7)               |
| <b>Eastern Europe</b>                                                                                                                                        |                            |                            |                            |                            |                                                |                                     |
| Belarus                                                                                                                                                      | 2.1 (1.0 to 4.0)           | 0.5 (0.2 to 1.0)           | 0.5 (0.2 to 0.9)           | 0.2 (0.1 to 0.7)           | -5.7 (-10.9 to 1.0)                            | -52.1 (-80.5 to 16.1)               |
| Estonia                                                                                                                                                      | 10.4 (5.6 to 15.2)         | 5.7 (2.3 to 10.7)          | 5.1 (1.9 to 9.9)           | 2.4 (0.9 to 5.0)           | -5.7 (-10.5 to -1.4)                           | -55.1 (-79.3 to -18.6)              |
| Latvia                                                                                                                                                       | 7.1 (3.5 to 12.2)          | 4.0 (1.6 to 7.6)           | 3.8 (1.6 to 7.0)           | 1.8 (0.8 to 3.6)           | -5.2 (-8.6 to -1.5)                            | -52.4 (-72.5 to -20.6)              |
| Lithuania                                                                                                                                                    | 0.9 (0.4 to 1.9)           | 0.8 (0.3 to 1.7)           | 0.8 (0.3 to 1.7)           | 0.6 (0.2 to 1.3)           | -2.1 (-6.7 to 2.4)                             | -23.0 (-43.5 to -43.8)              |
| Moldova                                                                                                                                                      | 22.0 (16.6 to 29.6)        | 7.5 (4.0 to 12.6)          | 6.7 (3.4 to 11.5)          | 3.0 (1.9 to 3.4)           | -6.2 (-9.1 to -3.4)                            | -59.4 (-74.5 to -40.2)              |
| Russia                                                                                                                                                       | 0.1 (0.1 to 0.2)           | 0.1 (0.1 to 0.2)           | 0.1 (0.1 to 0.2)           | 0.1 (0.0 to 0.2)           | -3.6 (-8.7 to 0.6)                             | -36.1 (-72.7 to 9.1)                |
| Ukraine                                                                                                                                                      | 5.2 (2.3 to 9.5)           | 2.8 (1.2 to 5.6)           | 2.7 (1.1 to 5.4)           | 1.3 (0.5 to 2.6)           | -5.3 (-10.2 to -0.6)                           | -52.1 (-78.5 to -8.8)               |
| <b>High-income</b>                                                                                                                                           |                            |                            |                            |                            |                                                |                                     |
| <b>Australasia</b>                                                                                                                                           |                            |                            |                            |                            |                                                |                                     |
| Australia                                                                                                                                                    | 0.3 (0.1 to 0.7)           | 0.2 (0.0 to 0.4)           | 0.2 (0.0 to 0.4)           | 0.1 (0.0 to 0.4)           | -1.4 (-8.2 to 4.8)                             | -6.8 (-71.0 to 105.2)               |
| New Zealand                                                                                                                                                  | 0.3 (0.1 to 0.7)           | 0.2 (0.0 to 0.5)           | 0.2 (0.0 to 0.5)           | 0.1 (0.0 to 0.5)           | -3.2 (-12.2 to 3.3)                            | -27.6 (-84.0 to 64.5)               |
| <b>High-income Asia Pacific</b>                                                                                                                              |                            |                            |                            |                            |                                                |                                     |
| Brunei                                                                                                                                                       | 0.7 (0.2 to 1.5)           | 0.1 (0.0 to 0.3)           | 0.1 (0.0 to 0.3)           | 0.1 (0.0 to 0.3)           | -2.0 (-10.6 to 3.9)                            | -16.3 (-79.6 to 78.8)               |
| Japan                                                                                                                                                        | 0.1 (0.1 to 0.2)           | 0.1 (0.0 to 0.1)           | 0.1 (0.0 to 0.1)           | 0.1 (0.0 to 0.1)           | -0.3 (-1.4 to 0.7)                             | -4.8 (-18.8 to 11.1)                |
| South Korea                                                                                                                                                  | 0.1 (0.1 to 0.2)           | 0.0 (0.0 to 0.1)           | 0.0 (0.0 to 0.1)           | 0.0 (0.0 to 0.1)           | -0.3 (-5.0 to 4.8)                             | 3.2 (-53.0 to 107.0)                |
| Singapore                                                                                                                                                    | 0.3 (0.1 to 0.6)           | 0.1 (0.0 to 0.1)           | 0.1 (0.0 to 0.1)           | 0.1 (0.0 to 0.1)           | -0.6 (-5.2 to 4.2)                             | -3.1 (-54.3 to 88.4)                |
| <b>High-income North America</b>                                                                                                                             |                            |                            |                            |                            |                                                |                                     |
| Canada                                                                                                                                                       | 0.1 (0.0 to 0.2)           | 0.0 (0.0 to 0.1)           | 0.0 (0.0 to 0.1)           | 0.0 (0.0 to 0.1)           | -0.7 (-10.6 to 6.5)                            | 19.2 (-79.6 to 164.0)               |
| Greenland                                                                                                                                                    | 1.0 (0.4 to 2.0)           | 0.6 (0.2 to 1.2)           | 0.5 (0.2 to 1.1)           | 0.3 (0.1 to 0.6)           | -4.2 (-9.3 to 1.2)                             | -39.9 (-75.3 to 19.8)               |
| United States                                                                                                                                                | 0.2 (0.1 to 0.3)           | 0.1 (0.0 to 0.2)           | 0.1 (0.0 to 0.2)           | 0.1 (0.0 to 0.2)           | -0.5 (-2.0 to 1.3)                             | -6.3 (-25.4 to 13.5)                |
| <b>Southern Latin America</b>                                                                                                                                |                            |                            |                            |                            |                                                |                                     |
| Argentina                                                                                                                                                    | 7.9 (4.0 to 12.3)          | 2.4 (1.0 to 4.5)           | 2.2 (0.8 to 4.2)           | 0.9 (0.4 to 1.9)           | -6.5 (-11.5 to -1.6)                           | -59.4 (-82.2 to -21.8)              |
| Chile                                                                                                                                                        | 10.2 (5.9 to 15.2)         | 4.8 (2.3 to 9.0)           | 4.6 (2.0 to 8.5)           | 1.8 (0.8 to 3.4)           | -6.7 (-10.6 to -2.9)                           | -61.7 (-79.5 to -35.1)              |
| Uruguay                                                                                                                                                      | 3.5 (1.6 to 6.8)           | 1.7 (0.7 to 3.3)           | 1.5 (0.6 to 3.2)           | 0.7 (0.3 to 1.5)           | -5.9 (-9.8 to -1.9)                            | -56.7 (-77.0 to -25.3)              |
| <b>Western Europe</b>                                                                                                                                        |                            |                            |                            |                            |                                                |                                     |
| Andorra                                                                                                                                                      | 0.6 (0.2 to 1.3)           | 0.3 (0.1 to 0.7)           | 0.3 (0.1 to 0.7)           | 0.2 (0.1 to 0.4)           | -4.0 (-8.6 to 0.7)                             | -41.1 (-72.4 to 11.5)               |
| Austria                                                                                                                                                      | 1.1 (0.5 to 2.2)           | 0.5 (0.2 to 1.0)           | 0.5 (0.2 to 1.0)           | 0.2 (0.1 to 0.6)           | -4.5 (-9.0 to 0.1)                             | -46.0 (-74.0 to 1.0)                |
| Belgium                                                                                                                                                      | 0.4 (0.1 to 0.8)           | 0.2 (0.1 to 0.4)           | 0.2 (0.1 to 0.4)           | 0.1 (0.1 to 0.3)           | -2.0 (-6.5 to 3.1)                             | -20.4 (-62.4 to 59.3)               |
| Cyprus                                                                                                                                                       | 0.8 (0.3 to 1.6)           | 0.3 (0.1 to 0.6)           | 0.3 (0.1 to 0.6)           | 0.1 (0.1 to 0.2)           | -4.3 (-9.1 to 0.2)                             | -44.4 (-74.3 to 3.8)                |
| Denmark                                                                                                                                                      | 0.3 (0.1 to 0.6)           | 0.2 (0.1 to 0.3)           | 0.1 (0.1 to 0.3)           | 0.1 (0.1 to 0.3)           | -1.1 (-6.2 to 3.8)                             | -9.2 (-60.3 to 75.5)                |
| Finland                                                                                                                                                      | 0.6 (0.1 to 1.4)           | 0.2 (0.0 to 0.6)           | 0.2 (0.0 to 0.6)           | 0.1 (0.0 to 0.6)           | -3.6 (-14.2 to 5.4)                            | -26.3 (-88.1 to 125.6)              |
| France                                                                                                                                                       | 0.6 (0.2 to 1.2)           | 0.2 (0.1 to 0.5)           | 0.2 (0.1 to 0.5)           | 0.1 (0.1 to 0.3)           | -3.2 (-7.9 to 1.5)                             | -34.3 (-69.4 to 25.3)               |

|                                     | Estimate in 2000 (95% UIs) | Estimate in 2015 (95% UIs) | Estimate in 2017 (95% UIs) | Estimate in 2030 (95% UIs) | Annualised rate of change, 2015-2030 (95% UIs) | Percent change, 2015-2030 (95% UIs) |
|-------------------------------------|----------------------------|----------------------------|----------------------------|----------------------------|------------------------------------------------|-------------------------------------|
| Germany                             | 0.9 (0.4 to 1.7)           | 0.5 (0.2 to 0.9)           | 0.4 (0.2 to 0.9)           | 0.2 (0.1 to 0.5)           | -3.9 (-8.4 to 0.4)                             | -41.3 (-71.5 to 6.9)                |
| Greece                              | 0.8 (0.3 to 1.6)           | 0.4 (0.1 to 0.8)           | 0.4 (0.2 to 0.8)           | 0.2 (0.1 to 0.5)           | -3.9 (-8.6 to 1.0)                             | -40.6 (-72.4 to 16.0)               |
| Iceland                             | 0.6 (0.2 to 1.4)           | 0.3 (0.1 to 0.7)           | 0.2 (0.0 to 0.6)           | 0.2 (0.0 to 0.5)           | -3.4 (-11.4 to 3.2)                            | -30.2 (-81.9 to 61.8)               |
| Ireland                             | 0.9 (0.4 to 1.9)           | 0.4 (0.1 to 0.8)           | 0.4 (0.1 to 0.8)           | 0.2 (0.1 to 0.5)           | -4.4 (-9.2 to 0.4)                             | -45.0 (-74.9 to 5.7)                |
| Israel                              | 0.5 (0.2 to 1.1)           | 0.3 (0.1 to 0.7)           | 0.3 (0.1 to 0.6)           | 0.2 (0.1 to 0.4)           | -3.6 (-8.3 to 0.9)                             | -38.3 (-71.3 to 14.4)               |
| Italy                               | 0.8 (0.3 to 1.7)           | 0.4 (0.2 to 0.9)           | 0.4 (0.2 to 0.8)           | 0.2 (0.1 to 0.5)           | -4.1 (-8.9 to 0.9)                             | -41.8 (-73.9 to 13.8)               |
| Luxembourg                          | 0.5 (0.2 to 1.1)           | 0.2 (0.1 to 0.5)           | 0.2 (0.1 to 0.5)           | 0.1 (0.1 to 0.3)           | -3.3 (-8.3 to 1.7)                             | -34.3 (-71.2 to 30.0)               |
| Malta                               | 0.9 (0.4 to 1.9)           | 0.4 (0.2 to 0.9)           | 0.4 (0.2 to 0.8)           | 0.2 (0.1 to 0.4)           | -5.3 (-9.5 to -1.4)                            | -52.7 (-75.9 to -18.8)              |
| Netherlands                         | 0.3 (0.1 to 0.7)           | 0.1 (0.1 to 0.3)           | 0.1 (0.1 to 0.3)           | 0.1 (0.0 to 0.3)           | -1.3 (-6.4 to 3.8)                             | -10.2 (-61.8 to 76.6)               |
| Norway                              | 0.8 (0.4 to 1.6)           | 0.3 (0.1 to 0.7)           | 0.3 (0.1 to 0.6)           | 0.2 (0.1 to 0.3)           | -4.4 (-6.1 to -2.5)                            | -47.5 (-60.0 to -30.9)              |
| Portugal                            | 3.9 (1.7 to 7.7)           | 1.1 (0.4 to 2.4)           | 0.9 (0.3 to 2.1)           | 0.3 (0.1 to 0.8)           | -7.7 (-12.4 to -3.4)                           | -66.4 (-84.5 to -40.2)              |
| Spain                               | 2.1 (1.0 to 4.0)           | 0.9 (0.4 to 1.9)           | 0.9 (0.4 to 1.9)           | 0.5 (0.2 to 1.0)           | -4.4 (-8.6 to -0.3)                            | -45.8 (-72.4 to -5.0)               |
| Sweden                              | 0.8 (0.3 to 1.7)           | 0.3 (0.1 to 0.8)           | 0.3 (0.1 to 0.7)           | 0.2 (0.0 to 0.5)           | -2.7 (-8.9 to 3.7)                             | -25.6 (-73.7 to 74.6)               |
| Switzerland                         | 0.9 (0.4 to 2.0)           | 0.5 (0.2 to 1.1)           | 0.5 (0.2 to 1.0)           | 0.2 (0.1 to 0.6)           | -4.7 (-9.5 to -0.1)                            | -47.2 (-76.1 to -0.8)               |
| United Kingdom                      | 1.0 (0.5 to 1.9)           | 0.4 (0.2 to 0.7)           | 0.3 (0.2 to 0.7)           | 0.2 (0.1 to 0.4)           | -4.6 (-5.8 to -3.2)                            | -49.9 (-58.3 to -38.2)              |
| <b>Latin America and Caribbean</b>  |                            |                            |                            |                            |                                                |                                     |
| <b>Andean Latin America</b>         |                            |                            |                            |                            |                                                |                                     |
| Bolivia                             | 28.6 (20.8 to 39.3)        | 16.0 (9.8 to 22.0)         | 14.4 (8.6 to 20.1)         | 5.8 (3.4 to 8.3)           | -6.8 (-9.7 to -4.5)                            | -63.1 (-76.7 to -49.4)              |
| Ecuador                             | 10.1 (5.5 to 15.1)         | 4.1 (1.9 to 7.5)           | 3.6 (1.6 to 6.5)           | 1.3 (0.6 to 2.4)           | -7.9 (-10.8 to -4.9)                           | -68.5 (-80.2 to -52.3)              |
| Peru                                | 27.5 (19.6 to 39.1)        | 17.4 (11.2 to 24.1)        | 16.4 (10.3 to 22.7)        | 8.4 (5.0 to 12.0)          | -4.9 (-7.3 to -2.8)                            | -51.2 (-66.7 to -34.0)              |
| <b>Caribbean</b>                    |                            |                            |                            |                            |                                                |                                     |
| Antigua and Barbuda                 | 3.1 (1.4 to 5.9)           | 1.5 (0.7 to 2.8)           | 1.4 (0.6 to 2.8)           | 0.6 (0.3 to 1.3)           | -5.9 (-9.9 to -1.9)                            | -56.7 (-77.3 to -24.4)              |
| The Bahamas                         | 3.9 (1.6 to 7.5)           | 2.1 (0.8 to 4.2)           | 2.0 (0.8 to 4.1)           | 1.3 (0.5 to 2.5)           | -3.4 (-8.3 to 1.4)                             | -36.2 (-71.2 to 23.1)               |
| Barbados                            | 0.1 (0.1 to 0.2)           | 0.0 (0.0 to 0.1)           | 0.0 (0.0 to 0.1)           | 0.0 (0.0 to 0.1)           | -0.3 (-4.8 to 3.9)                             | 0.6 (-51.1 to 78.3)                 |
| Belize                              | 18.6 (11.5 to 25.8)        | 11.7 (6.0 to 17.2)         | 11.2 (5.6 to 16.6)         | 7.2 (3.5 to 10.9)          | -3.3 (-7.4 to 0.6)                             | -36.6 (-67.0 to 8.8)                |
| Bermuda                             | 3.3 (1.5 to 6.4)           | 2.6 (1.1 to 5.0)           | 2.5 (1.1 to 5.0)           | 1.7 (0.7 to 3.4)           | -3.0 (-6.6 to 0.7)                             | -33.4 (-62.7 to 10.6)               |
| Cuba                                | 4.6 (2.0 to 9.3)           | 2.1 (0.9 to 4.5)           | 1.9 (0.8 to 3.8)           | 0.8 (0.3 to 1.7)           | -6.1 (-10.8 to -1.6)                           | -57.3 (-80.1 to -20.9)              |
| Dominica                            | 15.6 (10.1 to 21.8)        | 7.0 (3.4 to 11.8)          | 6.4 (3.2 to 11.2)          | 2.6 (1.2 to 4.1)           | -6.7 (-10.1 to -3.1)                           | -62.0 (-78.0 to -36.9)              |
| Dominican Republic                  | 19.1 (13.6 to 25.5)        | 10.9 (5.8 to 15.7)         | 9.8 (5.2 to 14.5)          | 5.3 (2.7 to 8.1)           | -4.9 (-8.3 to -2.1)                            | -50.7 (-71.0 to -26.6)              |
| Grenada                             | 10.2 (5.5 to 15.7)         | 3.6 (1.7 to 6.7)           | 3.2 (1.4 to 6.2)           | 1.2 (0.6 to 2.4)           | -7.1 (-10.8 to -3.5)                           | -63.9 (-80.2 to -40.8)              |
| Guyana                              | 15.2 (8.4 to 21.5)         | 9.8 (4.5 to 15.3)          | 9.1 (4.2 to 14.7)          | 4.3 (1.9 to 7.2)           | -5.6 (-9.6 to -1.3)                            | -54.4 (-76.3 to -17.3)              |
| Haiti                               | 63.6 (45.0 to 80.9)        | 33.8 (19.1 to 74.7)        | 32.4 (17.8 to 73.1)        | 45.7 (29.3 to 67.7)        | -1.5 (-3.0 to 0.0)                             | -19.0 (-36.6 to 4.5)                |
| Jamaica                             | 14.3 (8.9 to 19.8)         | 7.3 (3.8 to 12.5)          | 7.1 (3.7 to 11.9)          | 3.6 (1.8 to 6.3)           | -5.0 (-7.4 to -2.4)                            | -51.6 (-67.0 to -30.6)              |
| Puerto Rico                         | 0.2 (0.1 to 0.4)           | 0.2 (0.1 to 0.4)           | 0.2 (0.0 to 0.4)           | 0.2 (0.0 to 0.4)           | -0.5 (-4.8 to 3.4)                             | -2.5 (-51.3 to 67.5)                |
| Saint Lucia                         | 15.2 (9.1 to 21.6)         | 5.6 (2.6 to 10.1)          | 4.9 (2.3 to 9.5)           | 1.7 (0.8 to 3.5)           | -7.8 (-11.5 to -4.2)                           | -67.7 (-82.1 to -46.5)              |
| Saint Vincent and the Grenadines    | 23.8 (16.9 to 32.8)        | 9.1 (4.4 to 14.8)          | 8.2 (4.2 to 13.1)          | 3.3 (1.6 to 5.4)           | -6.8 (-10.2 to -3.6)                           | -63.1 (-78.3 to -42.1)              |
| Suriname                            | 16.1 (9.9 to 22.9)         | 10.2 (5.2 to 15.3)         | 9.5 (4.9 to 14.9)          | 5.0 (2.5 to 8.1)           | -4.8 (-8.6 to -1.1)                            | -49.3 (-72.5 to -15.1)              |
| Trinidad and Tobago                 | 1.3 (0.5 to 2.8)           | 0.6 (0.3 to 1.3)           | 0.6 (0.2 to 1.3)           | 0.4 (0.2 to 0.9)           | -2.8 (-8.4 to 2.8)                             | -27.9 (-71.8 to 82.2)               |
| Virgin Islands, U.S.                | 1.9 (0.8 to 3.9)           | 1.1 (0.4 to 2.2)           | 1.0 (0.4 to 2.1)           | 0.6 (0.2 to 1.3)           | -3.7 (-7.4 to 0.0)                             | -40.3 (-67.1 to 0.6)                |
| <b>Central Latin America</b>        |                            |                            |                            |                            |                                                |                                     |
| Colombia                            | 17.8 (12.6 to 23.8)        | 7.9 (4.1 to 12.8)          | 6.9 (3.2 to 11.6)          | 2.9 (1.3 to 5.1)           | -6.9 (-11.1 to -3.6)                           | -63.3 (-81.0 to -41.3)              |
| Costa Rica                          | 13.4 (8.2 to 18.4)         | 6.8 (3.4 to 11.6)          | 6.2 (3.0 to 11.1)          | 2.7 (1.4 to 5.4)           | -5.7 (-8.2 to -3.0)                            | -56.4 (-70.6 to -36.6)              |
| El Salvador                         | 28.4 (20.4 to 39.3)        | 15.7 (10.3 to 20.9)        | 14.7 (9.6 to 19.7)         | 5.8 (3.6 to 8.0)           | -6.7 (-8.9 to -4.7)                            | -62.7 (-73.6 to -50.5)              |
| Guatemala                           | 43.5 (31.9 to 59.9)        | 30.8 (22.5 to 42.3)        | 29.2 (21.3 to 41.0)        | 15.6 (10.6 to 23.8)        | -4.6 (-6.1 to -3.1)                            | -49.6 (-59.9 to -37.4)              |
| Honduras                            | 44.2 (32.1 to 61.7)        | 32.5 (23.9 to 44.4)        | 31.0 (22.8 to 42.5)        | 20.0 (14.0 to 29.0)        | -3.3 (-4.6 to -1.9)                            | -38.6 (-49.9 to -24.3)              |
| Mexico                              | 14.3 (9.7 to 20.1)         | 10.6 (7.2 to 14.9)         | 10.2 (6.7 to 14.4)         | 4.4 (2.6 to 6.5)           | -5.9 (-6.8 to -4.7)                            | -58.4 (-64.2 to -50.7)              |
| Nicaragua                           | 43.4 (32.0 to 61.5)        | 28.8 (20.8 to 40.0)        | 26.8 (19.6 to 36.8)        | 13.8 (9.5 to 20.2)         | -4.9 (-6.3 to -3.6)                            | -52.1 (-61.2 to -41.3)              |
| Panama                              | 17.4 (12.1 to 23.5)        | 9.6 (5.4 to 14.4)          | 8.6 (4.6 to 13.1)          | 3.6 (1.8 to 5.7)           | -6.7 (-9.6 to -4.3)                            | -62.8 (-76.1 to -47.3)              |
| Venezuela                           | 1.4 (0.6 to 2.8)           | 0.5 (0.2 to 1.0)           | 0.4 (0.2 to 0.9)           | 0.2 (0.1 to 0.4)           | -6.8 (-12.0 to -0.9)                           | -60.2 (-83.5 to -12.9)              |
| <b>Tropical Latin America</b>       |                            |                            |                            |                            |                                                |                                     |
| Brazil                              | 15.1 (10.9 to 20.8)        | 6.4 (3.8 to 9.8)           | 5.6 (3.2 to 8.8)           | 2.0 (1.1 to 3.2)           | -7.8 (-8.8 to -6.8)                            | -68.8 (-73.4 to -64.0)              |
| Paraguay                            | 34.0 (25.3 to 45.6)        | 23.8 (17.4 to 32.9)        | 22.1 (15.8 to 30.1)        | 9.5 (6.5 to 13.7)          | -6.2 (-7.6 to -4.8)                            | -60.2 (-67.8 to -51.3)              |
| <b>North Africa and Middle East</b> |                            |                            |                            |                            |                                                |                                     |
| <b>North Africa and Middle East</b> |                            |                            |                            |                            |                                                |                                     |
| Afghanistan                         | 70.6 (50.4 to 86.9)        | 53.9 (37.3 to 75.8)        | 52.3 (35.6 to 76.3)        | 38.6 (23.2 to 67.8)        | -2.4 (-5.1 to 0.4)                             | -28.2 (-53.6 to 5.8)                |
| Algeria                             | 1.5 (0.6 to 3.2)           | 0.2 (0.1 to 0.5)           | 0.2 (0.1 to 0.4)           | 0.1 (0.0 to 0.3)           | -5.0 (-12.5 to 2.6)                            | -44.4 (-84.7 to 47.6)               |
| Bahrain                             | 0.6 (0.3 to 1.2)           | 0.3 (0.1 to 0.4)           | 0.2 (0.1 to 0.4)           | 0.1 (0.0 to 0.2)           | -7.2 (-10.9 to -3.4)                           | -64.7 (-80.4 to -40.3)              |
| Egypt                               | 4.7 (2.3 to 8.5)           | 0.5 (0.2 to 1.1)           | 0.4 (0.1 to 0.8)           | 0.3 (0.1 to 0.7)           | -3.8 (-10.5 to 2.4)                            | -36.8 (-79.3 to 43.4)               |
| Iran                                | 2.2 (1.2 to 3.8)           | 0.4 (0.2 to 0.6)           | 0.3 (0.1 to 0.5)           | 0.2 (0.1 to 0.5)           | -5.6 (-8.9 to -1.9)                            | -55.1 (-73.8 to -24.7)              |
| Iraq                                | 1.3 (0.5 to 2.5)           | 0.3 (0.1 to 0.6)           | 0.2 (0.1 to 0.5)           | 0.1 (0.0 to 0.2)           | -8.0 (-13.1 to -3.2)                           | -67.8 (-85.9 to -37.7)              |
| Jordan                              | 0.1 (0.1 to 0.3)           | 0.0 (0.0 to 0.1)           | 0.0 (0.0 to 0.0)           | 0.0 (0.0 to 0.0)           | 0.9 (-4.4 to 2.9)                              | -8.7 (-48.6 to 55.0)                |
| Kuwait                              | 0.6 (0.3 to 1.2)           | 0.1 (0.0 to 0.2)           | 0.1 (0.0 to 0.2)           | 0.1 (0.0 to 0.1)           | -2.3 (-7.1 to 2.7)                             | -24.3 (-65.7 to 49.0)               |
| Lebanon                             | 0.0 (0.0 to 0.1)           | 0.0 (0.0 to 0.0)           | 0.0 (0.0 to 0.0)           | 0.0 (0.0 to 0.0)           | -1.1 (-4.9 to 2.5)                             | -12.0 (-51.7 to 45.9)               |
| Libya                               | 0.3 (0.1 to 0.7)           | 0.0 (0.0 to 0.1)           | 0.0 (0.0 to 0.1)           | 0.0 (0.0 to 0.1)           | -2.3 (-10.2 to 6.0)                            | -14.5 (-78.3 to 146.7)              |
| Morocco                             | 5.1 (2.4 to 9.6)           | 1.9 (0.9 to 3.6)           | 1.4 (0.6 to 2.7)           | 0.5 (0.2 to 0.9)           | -9.1 (-13.3 to -4.8)                           | -72.9 (-86.5 to -51.7)              |
| Palestine                           | 1.8 (0.8 to 3.3)           | 0.6 (0.2 to 1.1)           | 0.4 (0.2 to 0.9)           | 0.2 (0.1 to 0.3)           | -8.2 (-12.1 to -4.2)                           | -69.7 (-83.7 to -46.9)              |
| Oman                                | 7.4 (3.4 to 13.7)          | 0.6 (0.2 to 1.2)           | 0.4 (0.2 to 0.9)           | 0.1 (0.1 to 0.3)           | -9.1 (-14.4 to -3.3)                           | -72.2 (-88.4 to -39.0)              |
| Qatar                               | 0.0 (0.0 to 0.0)           | 0.0 (0.0 to 0.0)           | 0.0 (0.0 to 0.0)           | 0.0 (0.0 to 0.0)           | -1.1 (-5.3 to 3.4)                             | -10.2 (-54.9 to 66.7)               |
| Saudi Arabia                        | 3.3 (1.2 to 6.7)           | 0.2 (0.1 to 0.4)           | 0.1 (0.0 to 0.4)           | 0.1 (0.0 to 0.2)           | -7.1 (-14.8 to 0.4)                            | -59.1 (-89.1 to 6.8)                |
| Sudan                               | 60.6 (39.0 to 81.0)        | 34.6 (20.5 to 53.0)        | 32.5 (20.4 to 47.8)        | 20.7 (11.8 to 33.4)        | -3.5 (-7.2 to 0.5)                             | -38.3 (-65.9 to 7.6)                |
| Syria                               | 0.4 (0.2 to 0.8)           | 0.1 (0.0 to 0.2)           | 0.1 (0.0 to 0.1)           | 0.1 (0.0 to 0.1)           | -2.0 (-6.3 to 2.5)                             | -21.7 (-60.8 to 46.6)               |
| Tunisia                             | 3.2 (1.4 to 5.9)           | 0.2 (0.1 to 0.5)           | 0.2 (0.1 to 0.3)           | 0.1 (0.0 to 0.3)           | -4.5 (-9.9 to 1.0)                             | -43.9 (-77.4 to 15.9)               |
| Turkey                              | 6.0 (2.9 to 10.5)          | 0.6 (0.2 to 1.1)           | 0.4 (0.2 to 0.9)           | 0.1 (0.1 to 0.3)           | -8.9 (-13.4 to -4.5)                           | -72.3 (-86.5 to -48.7)              |
| United Arab Emirates                | 0.9 (0.4 to 1.7)           | 0.2 (0.1 to 0.4)           | 0.2 (0.1 to 0.4)           | 0.1 (0.0 to 0.2)           | -4.7 (-10.8 to 1.8)                            | -44.6 (-80.2 to 31.6)               |
| Yemen                               | 43.7 (28.4 to 62.7)        | 21.3 (11.8 to 31.1)        | 19.4 (10.2 to 29.2)        | 10.2 (5.0 to 16.2)         | -5.0 (-9.3 to -1.3)                            | -50.4 (-75.3 to -17.6)              |
| <b>South Asia</b>                   |                            |                            |                            |                            |                                                |                                     |
| <b>South Asia</b>                   |                            |                            |                            |                            |                                                |                                     |
| Bangladesh                          | 55.4 (39.4 to 77.4)        | 40.1 (28.1 to 56.2)        | 38.9 (27.6 to 55.9)        | 26.8 (17.8 to 43.0)        | -2.8 (-4.6 to -0.9)                            | -33.1 (-49.5 to -12.1)              |
| Bhutan                              | 42.0 (29.8 to 61.5)        | 20.4 (12.8 to 27.9)        | 18.5 (11.1 to 25.9)        | 7.3 (4.1 to 10.7)          | -6.9 (-9.1 to -5.4)                            | -64.4 (-74.5 to -55.2)              |
| India                               | 43.3 (32.5 to 57.3)        | 26.1 (19.6 to 35.1)        | 23.7 (18.1 to 32.6)        | 10.8 (7.6 to 15.6)         | -5.9 (-6.8 to -4.8)                            | -58.9 (-64.2 to -51.4)              |

|                                               | Estimate in 2000 (95% UIs) | Estimate in 2015 (95% UIs) | Estimate in 2017 (95% UIs) | Estimate in 2030 (95% UIs) | Annualised rate of change, 2015-2030 (95% UIs) | Percent change, 2015-2030 (95% UIs) |
|-----------------------------------------------|----------------------------|----------------------------|----------------------------|----------------------------|------------------------------------------------|-------------------------------------|
| Nepal                                         | 51.2 (33.5 to 74.4)        | 34.1 (22.4 to 50.3)        | 31.2 (20.4 to 45.5)        | 17.0 (10.0 to 27.0)        | -4.7 (-8.0 to -1.7)                            | -49.6 (-69.8 to -22.3)              |
| Pakistan                                      | 46.8 (32.5 to 69.5)        | 30.1 (20.9 to 43.3)        | 27.9 (18.5 to 39.2)        | 15.9 (10.5 to 24.1)        | -4.3 (-6.9 to -1.9)                            | -46.6 (-64.4 to -24.3)              |
| <b>Southeast Asia, East Asia, and Oceania</b> |                            |                            |                            |                            |                                                |                                     |
| <b>East Asia</b>                              |                            |                            |                            |                            |                                                |                                     |
| China                                         | 29.6 (22.5 to 39.5)        | 13.4 (9.6 to 18.1)         | 12.2 (8.7 to 16.7)         | 4.8 (3.3 to 6.7)           | -6.9 (-7.6 to -6.2)                            | -64.4 (-68.0 to -60.3)              |
| North Korea                                   | 45.1 (32.2 to 64.6)        | 40.1 (28.9 to 56.7)        | 40.3 (28.9 to 56.7)        | 32.7 (22.4 to 49.2)        | -1.4 (-3.1 to 0.3)                             | -18.3 (-36.8 to 4.3)                |
| Taiwan (Province of China)                    | 7.2 (3.5 to 12.5)          | 2.3 (0.9 to 4.7)           | 2.1 (0.9 to 4.2)           | 0.7 (0.3 to 1.5)           | -7.6 (-12.1 to -3.0)                           | -66.1 (-83.7 to -36.2)              |
| <b>Oceania</b>                                |                            |                            |                            |                            |                                                |                                     |
| American Samoa                                | 16.8 (11.0 to 23.6)        | 11.4 (6.2 to 17.1)         | 10.8 (5.5 to 16.4)         | 5.8 (2.9 to 9.0)           | -4.6 (-6.8 to -2.3)                            | -49.2 (-63.7 to -29.4)              |
| Federated States of Micronesia                | 31.8 (23.5 to 44.8)        | 21.5 (15.0 to 30.5)        | 20.6 (13.9 to 29.5)        | 10.6 (7.0 to 16.0)         | -4.6 (-6.2 to -3.2)                            | -49.8 (-60.3 to -38.1)              |
| Fiji                                          | 27.1 (19.8 to 37.7)        | 18.9 (13.1 to 26.3)        | 17.6 (11.4 to 24.5)        | 8.9 (5.5 to 12.7)          | -5.0 (-7.0 to -3.6)                            | -52.6 (-65.2 to -41.4)              |
| Guam                                          | 5.4 (2.5 to 9.7)           | 5.1 (2.3 to 9.6)           | 5.0 (2.3 to 9.7)           | 3.0 (1.7 to 5.4)           | -1.9 (-5.2 to 1.3)                             | -22.6 (-54.1 to 22.1)               |
| Kiribati                                      | 62.9 (45.4 to 79.8)        | 54.5 (38.7 to 75.0)        | 52.6 (37.5 to 73.3)        | 42.5 (27.6 to 66.3)        | -1.7 (-3.0 to -0.3)                            | -22.3 (-36.2 to -4.4)               |
| Marshall Islands                              | 26.4 (19.5 to 36.0)        | 18.6 (12.7 to 25.3)        | 17.3 (11.3 to 23.9)        | 8.6 (5.4 to 12.6)          | -5.2 (-7.3 to -3.4)                            | -53.4 (-66.6 to -40.2)              |
| Northern Mariana Islands                      | 11.9 (6.7 to 17.1)         | 9.8 (4.9 to 15.4)          | 9.3 (4.8 to 14.6)          | 5.8 (2.9 to 9.4)           | -3.5 (-6.0 to -1.0)                            | -39.6 (-59.5 to -13.9)              |
| Papua New Guinea                              | 63.9 (45.4 to 80.9)        | 56.2 (40.2 to 76.1)        | 54.6 (38.9 to 75.2)        | 44.4 (28.8 to 69.0)        | -1.6 (-3.3 to 0.0)                             | -21.2 (-39.4 to 0.5)                |
| Samoa                                         | 38.4 (27.8 to 53.7)        | 34.5 (25.2 to 47.5)        | 32.9 (24.1 to 45.5)        | 20.6 (14.2 to 30.7)        | -3.5 (-5.0 to -2.0)                            | -40.4 (-53.1 to -25.8)              |
| Solomon Islands                               | 64.8 (46.0 to 81.5)        | 57.5 (39.8 to 77.2)        | 56.2 (40.3 to 76.1)        | 46.3 (30.2 to 70.0)        | -1.5 (-3.0 to 0.1)                             | -19.7 (-36.6 to 0.9)                |
| Tonga                                         | 34.4 (25.0 to 48.2)        | 22.6 (16.0 to 31.0)        | 21.4 (15.6 to 29.4)        | 11.9 (8.4 to 17.1)         | -4.3 (-5.6 to -3.0)                            | -47.3 (-56.7 to -36.7)              |
| Vanuatu                                       | 56.9 (40.6 to 76.0)        | 47.3 (34.4 to 67.1)        | 46.0 (32.7 to 65.9)        | 35.6 (23.7 to 56.8)        | -2.0 (-3.4 to -0.5)                            | -25.0 (-40.0 to -7.8)               |
| <b>Southeast Asia</b>                         |                            |                            |                            |                            |                                                |                                     |
| Cambodia                                      | 65.3 (46.9 to 82.1)        | 51.1 (36.4 to 72.6)        | 49.5 (35.2 to 69.8)        | 35.1 (22.4 to 59.1)        | -2.6 (-4.6 to -0.7)                            | -31.7 (-49.7 to -10.0)              |
| Indonesia                                     | 33.4 (25.5 to 45.1)        | 23.0 (17.6 to 30.6)        | 21.3 (16.1 to 28.5)        | 9.4 (6.6 to 13.2)          | -6.0 (-6.9 to -5.0)                            | -59.2 (-64.4 to -52.6)              |
| Laos                                          | 62.5 (44.3 to 80.5)        | 48.1 (34.0 to 68.7)        | 46.5 (32.8 to 67.0)        | 38.1 (25.2 to 60.3)        | -1.6 (-3.5 to 0.3)                             | -20.7 (-40.7 to 5.0)                |
| Malaysia                                      | 4.9 (2.3 to 9.1)           | 1.7 (0.7 to 3.6)           | 1.4 (0.6 to 3.0)           | 0.8 (0.2 to 2.1)           | -5.0 (-11.0 to 1.5)                            | -46.7 (-80.8 to 25.9)               |
| Maldives                                      | 29.9 (22.4 to 41.4)        | 9.2 (5.0 to 13.8)          | 7.4 (3.5 to 11.8)          | 2.7 (1.2 to 4.5)           | -8.4 (-10.7 to -6.2)                           | -71.0 (-80.0 to -60.4)              |
| Mauritius                                     | 6.6 (3.1 to 11.2)          | 2.4 (1.1 to 4.6)           | 2.1 (0.9 to 4.1)           | 0.8 (0.3 to 1.5)           | -7.6 (-11.5 to -3.5)                           | -66.4 (-82.3 to -40.6)              |
| Myanmar                                       | 55.8 (39.8 to 76.1)        | 38.3 (26.9 to 54.6)        | 37.5 (26.9 to 53.1)        | 22.4 (14.7 to 35.7)        | -3.6 (-5.6 to -1.6)                            | -41.4 (-56.8 to -20.9)              |
| Philippines                                   | 29.6 (21.9 to 40.8)        | 29.9 (22.1 to 41.8)        | 28.5 (20.9 to 40.1)        | 20.1 (14.1 to 29.4)        | -2.7 (-4.1 to -1.2)                            | -32.5 (-45.9 to -16.2)              |
| Sri Lanka                                     | 36.9 (27.1 to 51.2)        | 22.8 (15.7 to 32.6)        | 22.3 (15.3 to 32.1)        | 10.2 (6.5 to 15.6)         | -5.4 (-7.4 to -3.4)                            | -55.3 (-66.9 to -39.7)              |
| Seychelles                                    | 6.1 (2.9 to 10.8)          | 3.7 (1.6 to 7.2)           | 3.1 (1.4 to 6.4)           | 1.3 (0.5 to 3.2)           | -7.2 (-10.7 to -2.0)                           | -63.9 (-80.0 to -25.4)              |
| Thailand                                      | 24.8 (18.0 to 34.0)        | 10.5 (5.7 to 16.4)         | 9.3 (4.6 to 15.3)          | 3.3 (1.6 to 5.5)           | -7.8 (-11.2 to -4.7)                           | -68.1 (-81.5 to -50.5)              |
| Timor-Leste                                   | 68.4 (49.3 to 83.8)        | 48.6 (34.4 to 69.4)        | 48.0 (34.6 to 67.5)        | 34.7 (22.6 to 56.8)        | -2.3 (-4.1 to -0.4)                            | -28.3 (-45.9 to -5.8)               |
| Vietnam                                       | 41.2 (28.7 to 60.0)        | 21.6 (15.1 to 29.6)        | 19.9 (13.7 to 27.8)        | 8.0 (5.2 to 11.7)          | -6.7 (-9.0 to -4.8)                            | -62.8 (-74.2 to -51.3)              |
| <b>Sub-Saharan Africa</b>                     |                            |                            |                            |                            |                                                |                                     |
| <b>Central Sub-Saharan Africa</b>             |                            |                            |                            |                            |                                                |                                     |
| Angola                                        | 62.6 (42.0 to 81.0)        | 37.6 (25.2 to 52.8)        | 35.9 (25.2 to 50.1)        | 16.9 (10.6 to 26.8)        | -5.4 (-7.8 to -2.8)                            | -55.0 (-68.9 to -34.2)              |
| Central African Republic                      | 69.0 (46.6 to 86.0)        | 60.1 (36.5 to 82.2)        | 60.0 (37.7 to 81.9)        | 54.0 (31.5 to 78.3)        | -0.8 (-4.2 to 2.6)                             | -8.1 (-47.0 to 48.3)                |
| Congo                                         | 48.7 (32.1 to 73.1)        | 30.6 (19.8 to 44.8)        | 28.2 (16.9 to 41.8)        | 14.4 (7.8 to 23.4)         | -5.1 (-8.7 to -1.7)                            | -52.1 (-72.9 to -22.9)              |
| Democratic Republic of the Congo              | 68.7 (46.5 to 85.5)        | 60.7 (39.1 to 80.5)        | 58.6 (38.2 to 80.1)        | 51.0 (30.7 to 75.6)        | -1.2 (-4.1 to 1.3)                             | -15.0 (-46.3 to 22.0)               |
| Equatorial Guinea                             | 57.1 (38.0 to 78.3)        | 29.9 (18.5 to 41.4)        | 27.9 (17.0 to 41.4)        | 15.6 (8.9 to 25.2)         | 4.4 (-7.9 to -1.1)                             | -46.6 (-69.3 to -14.9)              |
| Gabon                                         | 22.9 (13.5 to 32.5)        | 8.7 (3.6 to 15.2)          | 7.3 (3.1 to 13.8)          | 2.8 (1.1 to 5.5)           | -7.8 (-13.6 to -2.0)                           | -65.4 (-86.9 to -25.8)              |
| <b>Eastern Sub-Saharan Africa</b>             |                            |                            |                            |                            |                                                |                                     |
| Burundi                                       | 69.8 (48.7 to 85.6)        | 67.0 (45.8 to 84.3)        | 66.1 (46.6 to 83.4)        | 59.0 (38.2 to 79.2)        | -0.9 (-3.2 to 1.5)                             | -11.2 (-38.0 to 24.7)               |
| Comoros                                       | 66.4 (47.5 to 82.6)        | 51.1 (36.6 to 73.1)        | 49.2 (35.1 to 69.9)        | 40.0 (26.6 to 63.0)        | -1.7 (-3.2 to 0.0)                             | -21.7 (-38.3 to 0.3)                |
| Djibouti                                      | 42.3 (28.4 to 62.0)        | 21.8 (12.5 to 32.4)        | 20.4 (10.6 to 31.2)        | 10.0 (4.8 to 15.9)         | -5.3 (-9.6 to -1.9)                            | -53.2 (-76.3 to -25.0)              |
| Eritrea                                       | 57.4 (38.6 to 78.9)        | 48.5 (31.4 to 70.5)        | 47.0 (30.7 to 69.4)        | 29.5 (16.6 to 55.5)        | -3.5 (-6.6 to -0.3)                            | -38.7 (-63.1 to -3.8)               |
| Ethiopia                                      | 69.2 (53.6 to 82.7)        | 62.9 (46.4 to 78.4)        | 60.4 (44.2 to 77.0)        | 49.7 (32.8 to 69.6)        | -1.6 (-3.0 to -0.5)                            | -21.5 (-36.3 to -7.1)               |
| Kenya                                         | 54.3 (41.6 to 69.3)        | 46.4 (35.2 to 60.9)        | 44.9 (34.1 to 59.2)        | 35.9 (25.8 to 50.8)        | -1.7 (-2.2 to -1.2)                            | -22.9 (-28.6 to -16.0)              |
| Madagascar                                    | 73.6 (55.4 to 86.3)        | 69.5 (49.2 to 84.1)        | 68.5 (49.2 to 83.0)        | 63.0 (42.5 to 79.8)        | -0.7 (-2.4 to 0.8)                             | -9.1 (-30.0 to 13.1)                |
| Malawi                                        | 75.2 (54.9 to 88.2)        | 66.1 (47.4 to 82.5)        | 65.2 (45.7 to 81.5)        | 59.4 (38.6 to 78.1)        | -0.8 (-2.6 to 0.9)                             | -10.1 (-32.0 to 14.4)               |
| Mozambique                                    | 79.8 (60.1 to 90.4)        | 68.4 (49.4 to 83.5)        | 66.7 (47.4 to 82.4)        | 55.8 (34.6 to 75.8)        | -1.5 (-3.6 to 0.3)                             | -18.7 (-41.6 to 3.8)                |
| Rwanda                                        | 67.9 (47.4 to 84.2)        | 57.0 (38.3 to 77.7)        | 55.2 (35.6 to 77.5)        | 46.0 (26.8 to 71.5)        | -1.5 (-4.3 to 0.9)                             | -18.8 (-47.2 to 14.2)               |
| Somalia                                       | 79.5 (59.9 to 90.2)        | 74.9 (54.2 to 87.9)        | 74.2 (54.5 to 87.6)        | 67.6 (45.4 to 83.9)        | -0.7 (-2.8 to 1.0)                             | -9.4 (-34.3 to 17.0)                |
| South Sudan                                   | 75.4 (53.3 to 88.9)        | 69.0 (47.2 to 85.2)        | 68.3 (45.9 to 84.9)        | 59.7 (35.9 to 79.8)        | -1.0 (-3.7 to 1.6)                             | -12.7 (-42.3 to 26.3)               |
| Tanzania                                      | 68.0 (48.3 to 83.8)        | 59.4 (41.0 to 78.4)        | 57.5 (39.1 to 77.7)        | 48.3 (29.9 to 72.0)        | -1.5 (-3.7 to 0.5)                             | -18.6 (-42.8 to 7.5)                |
| Uganda                                        | 72.7 (51.7 to 87.6)        | 56.7 (38.2 to 77.8)        | 54.5 (36.7 to 76.4)        | 46.6 (29.1 to 71.3)        | -1.4 (-3.8 to 0.9)                             | -17.2 (-43.4 to 15.3)               |
| Zambia                                        | 58.4 (40.9 to 78.5)        | 48.9 (33.4 to 70.9)        | 47.5 (33.1 to 67.0)        | 40.0 (26.5 to 60.4)        | -1.4 (-3.2 to 0.6)                             | -17.7 (-38.5 to 9.8)                |
| <b>Southern Sub-Saharan Africa</b>            |                            |                            |                            |                            |                                                |                                     |
| Botswana                                      | 31.9 (23.5 to 43.6)        | 23.0 (16.4 to 31.9)        | 21.9 (15.6 to 29.9)        | 9.2 (6.2 to 13.1)          | -6.2 (-8.3 to -4.1)                            | -59.8 (-71.2 to -46.2)              |
| Lesotho                                       | 44.2 (32.4 to 62.8)        | 36.8 (27.0 to 51.4)        | 35.5 (25.8 to 49.6)        | 25.3 (17.4 to 38.4)        | -2.6 (-4.2 to -1.0)                            | -31.4 (-47.0 to -14.5)              |
| Namibia                                       | 38.3 (27.2 to 54.8)        | 28.0 (20.2 to 38.8)        | 26.4 (18.2 to 37.5)        | 16.6 (11.0 to 25.2)        | -3.5 (-5.9 to -1.5)                            | -40.2 (-58.9 to -20.6)              |
| South Africa                                  | 20.1 (15.2 to 27.2)        | 8.5 (6.0 to 11.5)          | 7.3 (5.1 to 10.1)          | 2.9 (1.9 to 4.0)           | -7.3 (-8.4 to -6.2)                            | -66.2 (-71.7 to -60.5)              |
| Swaziland                                     | 44.9 (32.8 to 62.2)        | 25.4 (18.9 to 34.9)        | 24.0 (18.1 to 33.2)        | 10.7 (7.7 to 15.6)         | -5.8 (-7.1 to -4.4)                            | -57.7 (-65.3 to -48.3)              |
| Zimbabwe                                      | 43.4 (31.4 to 60.8)        | 44.6 (32.7 to 63.3)        | 42.6 (31.1 to 59.8)        | 31.9 (21.8 to 48.3)        | -2.3 (-4.0 to -0.6)                            | -28.3 (-45.5 to -8.2)               |
| <b>Western Sub-Saharan Africa</b>             |                            |                            |                            |                            |                                                |                                     |
| Benin                                         | 69.0 (46.4 to 84.9)        | 58.0 (37.4 to 78.7)        | 56.5 (35.5 to 78.0)        | 48.2 (27.7 to 72.9)        | -1.3 (-4.2 to 1.2)                             | -16.1 (-46.9 to 19.3)               |
| Burkina Faso                                  | 75.5 (53.2 to 88.9)        | 66.6 (44.5 to 84.0)        | 65.0 (44.6 to 84.0)        | 55.4 (32.7 to 77.8)        | -1.3 (-4.3 to 1.5)                             | -15.9 (-47.7 to 25.0)               |
| Cameroon                                      | 48.6 (29.3 to 73.3)        | 33.8 (21.0 to 51.0)        | 31.1 (18.8 to 46.2)        | 23.1 (13.8 to 36.5)        | -2.6 (-6.3 to 1.0)                             | -29.7 (-61.1 to 15.6)               |
| Cape Verde                                    | 41.4 (28.5 to 58.9)        | 24.6 (16.5 to 35.9)        | 23.4 (15.6 to 33.2)        | 10.1 (6.3 to 15.3)         | -6.0 (-8.5 to -4.0)                            | -58.8 (-72.0 to -44.7)              |
| Chad                                          | 74.8 (50.7 to 89.9)        | 66.1 (40.6 to 85.2)        | 65.6 (39.4 to 85.5)        | 59.9 (33.2 to 82.5)        | -0.7 (-4.2 to 2.6)                             | -7.4 (-49.2 to 46.8)                |
| Cote d'Ivoire                                 | 62.0 (43.6 to 80.5)        | 55.7 (35.7 to 75.7)        | 52.3 (36.2 to 74.0)        | 40.9 (25.5 to 67.3)        | -1.9 (-4.1 to 0.3)                             | -23.6 (-45.9 to -5.0)               |
| The Gambia                                    | 67.0 (45.5 to 83.3)        | 56.9 (38.4 to 77.4)        | 56.1 (38.7 to 76.8)        | 49.8 (32.1 to 72.9)        | -0.9 (-3.0 to 1.2)                             | -11.9 (-36.1 to 19.0)               |
| Ghana                                         | 53.3 (36.5 to 74.8)        | 38.5 (26.4 to 55.3)        | 36.1 (24.2 to 52.2)        | 24.4 (15.2 to 38.6)        | -3.1 (-5.7 to -0.5)                            | -36.1 (-57.5 to -7.5)               |
| Guinea                                        | 77.4 (58.9 to 88.8)        | 69.0 (47.8 to 83.3)        | 67.6 (47.3 to 83.3)        | 62.0 (40.4 to 79.9)        | -0.7 (-2.8 to 1.1)                             | -9.6 (-34.2 to 17.8)                |
| Guinea-Bissau                                 | 74.1 (54.6 to 87.4)        | 65.0 (44.9 to 81.9)        | 64.1 (45.0 to 81.7)        | 58.0 (37.7 to 78.0)        | -0.8 (-2.7 to 1.1)                             | -10.5 (-33.5 to 18.7)               |
| Liberia                                       | 79.5 (60.9 to 90.0)        | 70.3 (51.9 to 83.4)        | 69.3 (51.1 to 83.4)        | 63.2 (43.2 to 79.5)        | -0.7 (-2.4 to 0.7)                             | -10.0 (-30.0 to 10.9)               |
| Mali                                          | 76.9 (54.7 to 90.3)        | 70.1 (45.9 to 86.3)        | 69.8 (46.9 to 85.8)        | 63.9 (39.2 to 82.3)        | -0.7 (-3.6 to 1.8)                             | -7.9 (-41.4 to 31.1)                |
| Mauritania                                    | 43.0 (27.2 to 64.0)        | 33.4 (20.3 to 47.4)        | 31.6 (19.8 to 46.4)        | 21.4 (12.6 to 34.1)        | -3.0 (-6.5 to 0.3)                             | -34.2 (-62.0 to 5.3)                |
| Niger                                         | 74.9 (47.2 to 90.8)        | 70.1 (39.4 to 88.7)        | 68.1 (39.7 to 88.0)        | 61.4 (31.7 to 84.6)        | -1.0 (-5.1 to 2.8)                             | -9.5 (-53.4 to 52.2)                |

|                                                                                                                                                           | Estimate in 2000 (95% UIs) | Estimate in 2015 (95% UIs) | Estimate in 2017 (95% UIs) | Estimate in 2030 (95% UIs) | Annualised rate of change, 2015-2030 (95% UIs) | Percent change, 2015-2030 (95% UIs) |
|-----------------------------------------------------------------------------------------------------------------------------------------------------------|----------------------------|----------------------------|----------------------------|----------------------------|------------------------------------------------|-------------------------------------|
| Nigeria                                                                                                                                                   | 48.3 (26.3 to 73.4)        | 34.5 (16.4 to 52.4)        | 37.7 (15.7 to 52.3)        | 23.6 (10.2 to 39.9)        | -2.6 (-7.7 to 2.4)                             | -28.3 (-68.5 to -42.3)              |
| San Tome and Principe                                                                                                                                     | 60.2 (42.4 to 79.2)        | 38.6 (27.4 to 54.3)        | 36.1 (25.4 to 51.7)        | 18.7 (12.0 to 30.7)        | -4.9 (-6.5 to -2.8)                            | -51.4 (-64.0 to -34.2)              |
| Senegal                                                                                                                                                   | 54.0 (37.8 to 74.7)        | 53.2 (36.6 to 75.5)        | 53.4 (37.1 to 75.2)        | 45.9 (29.8 to 70.6)        | -1.0 (-3.2 to 1.3)                             | -13.0 (-38.4 to 21.4)               |
| Sierra Leone                                                                                                                                              | 76.1 (56.1 to 88.4)        | 66.6 (47.6 to 82.5)        | 65.5 (47.7 to 81.9)        | 59.0 (39.9 to 77.9)        | -0.8 (-2.6 to 0.7)                             | -11.2 (-32.2 to 11.1)               |
| Togo                                                                                                                                                      | 65.9 (45.8 to 83.0)        | 55.7 (38.0 to 76.8)        | 54.1 (36.2 to 75.7)        | 43.8 (26.3 to 69.2)        | -1.7 (-4.3 to 0.7)                             | -21.1 (-47.9 to 10.6)               |
| <b>Indicator 8.8.1: Age-standardised all-cause disability-adjusted life year (DALY) rates attributable to occupational risks (per 100,000 population)</b> |                            |                            |                            |                            |                                                |                                     |
| <b>Central Europe, Eastern Europe, and Central Asia</b>                                                                                                   |                            |                            |                            |                            |                                                |                                     |
| <b>Central Asia</b>                                                                                                                                       |                            |                            |                            |                            |                                                |                                     |
| Armenia                                                                                                                                                   | 1003.6 (821.2 to 1192.2)   | 850.2 (686.4 to 1025.5)    | 840.8 (678.0 to 1018.1)    | 745.5 (584.4 to 920.7)     | -0.9 (-1.2 to -0.6)                            | -12.4 (-16.6 to -8.3)               |
| Azerbaijan                                                                                                                                                | 910.1 (741.4 to 1090.1)    | 752.9 (599.7 to 928.0)     | 743.9 (588.4 to 920.7)     | 696.8 (533.4 to 886.1)     | -0.5 (-0.9 to -0.1)                            | -7.6 (-13.2 to -1.7)                |
| Georgia                                                                                                                                                   | 807.2 (642.8 to 978.4)     | 752.3 (610.7 to 905.5)     | 743.9 (603.3 to 893.4)     | 679.1 (552.2 to 827.0)     | -0.7 (-1.0 to -0.4)                            | -9.7 (-13.8 to -5.6)                |
| Kazakhstan                                                                                                                                                | 1149.9 (980.4 to 1344.5)   | 842.1 (707.6 to 989.0)     | 806.1 (672.6 to 950.5)     | 635.1 (518.2 to 772.5)     | -1.9 (-2.2 to -1.6)                            | -24.7 (-28.5 to -21.0)              |
| Kyrgyzstan                                                                                                                                                | 1024.1 (847.1 to 1209.6)   | 747.5 (601.3 to 893.6)     | 716.7 (574.6 to 860.2)     | 589.6 (462.7 to 722.6)     | -1.6 (-2.0 to -1.2)                            | -21.2 (-25.5 to -16.8)              |
| Mongolia                                                                                                                                                  | 975.9 (802.6 to 1158.7)    | 707.4 (572.2 to 858.1)     | 681.5 (550.8 to 829.0)     | 554.2 (432.7 to 687.8)     | -1.6 (-2.0 to -1.2)                            | -21.7 (-26.4 to -17.0)              |
| Tajikistan                                                                                                                                                | 1080.5 (869.1 to 1319.4)   | 808.2 (640.8 to 1001.4)    | 773.9 (612.2 to 961.5)     | 634.7 (484.4 to 801.0)     | -1.6 (-2.1 to -1.1)                            | -21.6 (-27.5 to -15.7)              |
| Turkmenistan                                                                                                                                              | 865.8 (692.0 to 1061.3)    | 703.7 (557.3 to 879.1)     | 691.5 (546.3 to 870.1)     | 619.0 (467.3 to 801.7)     | -0.9 (-1.4 to -0.4)                            | -12.2 (-18.5 to -5.9)               |
| Uzbekistan                                                                                                                                                | 1003.1 (814.3 to 1210.5)   | 759.7 (607.5 to 921.6)     | 735.9 (587.0 to 900.1)     | 639.9 (494.3 to 806.4)     | -1.2 (-1.6 to -0.7)                            | -15.9 (-21.6 to -10.3)              |
| <b>Central Europe</b>                                                                                                                                     |                            |                            |                            |                            |                                                |                                     |
| Albania                                                                                                                                                   | 997.5 (784.0 to 1246.4)    | 904.4 (702.0 to 1154.0)    | 889.0 (686.1 to 1133.3)    | 847.0 (635.4 to 1116.4)    | -0.5 (-0.9 to 0.0)                             | -6.5 (-12.3 to 0.1)                 |
| Bosnia and Herzegovina                                                                                                                                    | 851.8 (682.5 to 1039.9)    | 647.1 (500.5 to 801.9)     | 625.1 (481.8 to 776.4)     | 525.1 (396.7 to 670.5)     | -1.4 (-1.9 to -1.0)                            | -19.0 (-24.4 to -13.7)              |
| Bulgaria                                                                                                                                                  | 521.4 (416.8 to 631.1)     | 574.6 (460.9 to 700.8)     | 587.8 (460.4 to 716.9)     | 641.1 (525.6 to 820.2)     | 1.0 (0.6 to 1.3)                               | 15.5 (10.0 to 20.9)                 |
| Croatia                                                                                                                                                   | 661.8 (533.0 to 798.3)     | 663.3 (538.0 to 801.5)     | 663.8 (541.4 to 802.9)     | 679.4 (548.7 to 824.2)     | 0.2 (0.2 to 0.5)                               | 2.4 (-2.3 to 7.1)                   |
| Czech Republic                                                                                                                                            | 946.4 (775.4 to 1128.5)    | 774.0 (618.2 to 957.3)     | 761.5 (602.8 to 949.6)     | 688.0 (519.9 to 885.6)     | -0.9 (-1.3 to -0.4)                            | -12.2 (-17.9 to -6.3)               |
| Hungary                                                                                                                                                   | 722.9 (593.7 to 861.5)     | 647.6 (516.0 to 782.7)     | 642.0 (508.9 to 776.2)     | 600.4 (465.3 to 745.3)     | -0.5 (-0.8 to -0.2)                            | -7.4 (-11.7 to -3.6)                |
| Macedonia                                                                                                                                                 | 579.4 (461.7 to 715.4)     | 555.5 (427.5 to 693.9)     | 555.7 (426.4 to 698.7)     | 550.9 (407.7 to 706.7)     | -0.1 (-0.5 to 0.4)                             | -0.7 (-7.5 to 6.7)                  |
| Montenegro                                                                                                                                                | 551.9 (439.8 to 674.4)     | 513.3 (401.0 to 632.4)     | 511.8 (398.3 to 633.4)     | 493.7 (374.4 to 623.5)     | -0.3 (-0.7 to 0.1)                             | -3.9 (-9.8 to 1.7)                  |
| Poland                                                                                                                                                    | 894.0 (731.2 to 1061.1)    | 732.7 (598.4 to 884.3)     | 721.0 (587.1 to 873.7)     | 646.9 (514.9 to 794.2)     | -0.8 (-1.2 to -0.5)                            | -11.8 (-16.1 to -7.7)               |
| Romania                                                                                                                                                   | 1018.9 (826.8 to 1229.2)   | 837.3 (666.4 to 1026.2)    | 824.5 (653.3 to 1014.0)    | 752.5 (582.5 to 940.1)     | -0.7 (-1.0 to -0.4)                            | -10.2 (-14.1 to -6.4)               |
| Serbia                                                                                                                                                    | 770.1 (613.1 to 942.3)     | 735.4 (579.0 to 907.1)     | 730.4 (574.1 to 902.6)     | 709.9 (543.4 to 893.8)     | -0.2 (-0.6 to 0.1)                             | -3.5 (-8.0 to 1.4)                  |
| Slovakia                                                                                                                                                  | 636.3 (519.1 to 764.4)     | 545.5 (433.3 to 665.6)     | 541.5 (428.0 to 664.8)     | 496.9 (381.0 to 623.9)     | -0.6 (-1.0 to -0.3)                            | -9.1 (-13.6 to -4.4)                |
| Slovenia                                                                                                                                                  | 778.1 (631.3 to 932.1)     | 742.1 (588.3 to 904.0)     | 746.4 (588.3 to 916.8)     | 732.0 (564.3 to 924.0)     | -0.1 (-0.5 to 0.3)                             | -1.5 (-7.1 to 3.9)                  |
| <b>Eastern Europe</b>                                                                                                                                     |                            |                            |                            |                            |                                                |                                     |
| Belarus                                                                                                                                                   | 708.5 (588.6 to 839.8)     | 554.5 (449.0 to 675.7)     | 543.9 (436.7 to 665.6)     | 470.4 (363.2 to 591.5)     | -1.1 (-1.5 to -0.8)                            | -15.3 (-20.0 to -10.7)              |
| Estonia                                                                                                                                                   | 698.9 (574.4 to 836.1)     | 531.8 (420.4 to 655.2)     | 509.1 (401.1 to 634.0)     | 411.2 (311.3 to 523.8)     | -1.7 (-2.1 to -1.4)                            | -22.8 (-27.0 to -18.8)              |
| Latvia                                                                                                                                                    | 693.7 (569.1 to 827.7)     | 600.0 (482.0 to 725.7)     | 587.4 (470.8 to 712.6)     | 526.3 (406.3 to 659.6)     | -0.9 (-1.3 to -0.5)                            | -12.4 (-17.2 to -7.1)               |
| Lithuania                                                                                                                                                 | 706.6 (580.5 to 839.0)     | 601.5 (485.6 to 729.5)     | 586.2 (468.6 to 712.4)     | 518.6 (404.0 to 648.3)     | -1.0 (-1.4 to -0.6)                            | -13.9 (-19.2 to -8.8)               |
| Moldova                                                                                                                                                   | 691.6 (553.5 to 842.8)     | 521.8 (416.8 to 641.7)     | 505.2 (402.7 to 623.7)     | 426.2 (329.8 to 542.0)     | -1.4 (-1.8 to -1.0)                            | -18.4 (-23.1 to -13.4)              |
| Russia                                                                                                                                                    | 902.4 (769.0 to 1054.0)    | 738.7 (615.1 to 878.6)     | 732.2 (604.6 to 876.9)     | 653.0 (522.1 to 805.1)     | -0.8 (-1.1 to -0.5)                            | -11.7 (-15.8 to -7.2)               |
| Ukraine                                                                                                                                                   | 806.6 (681.4 to 942.8)     | 616.2 (506.9 to 737.8)     | 599.6 (491.6 to 717.6)     | 497.2 (396.9 to 615.0)     | -1.4 (-1.8 to -1.1)                            | -19.4 (-23.2 to -15.1)              |
| <b>High-income</b>                                                                                                                                        |                            |                            |                            |                            |                                                |                                     |
| <b>Australasia</b>                                                                                                                                        |                            |                            |                            |                            |                                                |                                     |
| Australia                                                                                                                                                 | 795.8 (666.1 to 928.7)     | 698.4 (572.0 to 833.9)     | 686.2 (559.5 to 822.4)     | 629.0 (498.5 to 771.7)     | -0.7 (-1.1 to -0.4)                            | -10.1 (-14.6 to -5.5)               |
| New Zealand                                                                                                                                               | 903.4 (737.4 to 1067.9)    | 809.3 (652.7 to 988.7)     | 805.3 (645.7 to 987.7)     | 768.9 (603.6 to 974.1)     | -0.4 (-0.7 to 0.0)                             | -5.1 (-10.3 to 0.4)                 |
| <b>High-income Asia Pacific</b>                                                                                                                           |                            |                            |                            |                            |                                                |                                     |
| Brunei                                                                                                                                                    | 1125.0 (957.9 to 1313.1)   | 820.2 (675.8 to 979.8)     | 790.2 (647.6 to 949.5)     | 620.4 (477.7 to 782.7)     | -1.9 (-2.5 to -1.3)                            | -24.5 (-30.8 to -18.1)              |
| Japan                                                                                                                                                     | 809.4 (651.2 to 979.2)     | 707.3 (555.7 to 879.2)     | 697.5 (544.4 to 874.9)     | 637.3 (480.8 to 826.9)     | -0.7 (-1.1 to -0.3)                            | -10.1 (-15.2 to -4.2)               |
| South Korea                                                                                                                                               | 1159.7 (974.1 to 1365.6)   | 966.1 (768.7 to 1188.6)    | 940.6 (738.2 to 1164.2)    | 820.0 (601.1 to 1072.4)    | -1.1 (-1.7 to -0.6)                            | -15.4 (-23.0 to -8.0)               |
| Singapore                                                                                                                                                 | 778.5 (637.4 to 930.1)     | 578.8 (452.6 to 724.0)     | 563.2 (438.3 to 712.1)     | 469.9 (348.8 to 620.0)     | -1.4 (-2.0 to -0.8)                            | -19.1 (-25.9 to -11.8)              |
| <b>High-income North America</b>                                                                                                                          |                            |                            |                            |                            |                                                |                                     |
| Canada                                                                                                                                                    | 887.2 (756.3 to 1033.0)    | 712.9 (584.8 to 847.3)     | 696.3 (568.2 to 830.9)     | 598.5 (471.1 to 734.6)     | -1.2 (-1.6 to -0.8)                            | -16.2 (-21.1 to -11.9)              |
| Greenland                                                                                                                                                 | 1279.0 (1091.2 to 1450.2)  | 986.6 (840.1 to 1136.8)    | 947.5 (802.1 to 1092.8)    | 759.9 (630.9 to 902.0)     | -1.8 (-2.1 to -1.4)                            | -23.0 (-27.4 to -18.5)              |
| United States                                                                                                                                             | 703.3 (598.4 to 811.0)     | 583.4 (492.8 to 678.4)     | 570.7 (481.0 to 664.2)     | 501.0 (416.7 to 588.6)     | -1.0 (-1.2 to -0.8)                            | -14.2 (-17.0 to -11.4)              |
| <b>Southern Latin America</b>                                                                                                                             |                            |                            |                            |                            |                                                |                                     |
| Argentina                                                                                                                                                 | 1003.8 (836.5 to 1179.0)   | 904.7 (741.9 to 1068.5)    | 893.2 (729.1 to 1056.9)    | 833.3 (653.0 to 1014.0)    | -0.6 (-1.0 to -0.2)                            | -8.0 (-14.0 to -2.4)                |
| Chile                                                                                                                                                     | 631.1 (514.5 to 751.6)     | 665.3 (535.7 to 808.1)     | 672.4 (539.3 to 819.7)     | 733.9 (572.1 to 924.0)     | 0.6 (0.3 to 1.0)                               | 10.2 (4.4 to 15.5)                  |
| Uruguay                                                                                                                                                   | 689.7 (580.8 to 807.8)     | 741.0 (620.7 to 874.5)     | 747.1 (623.5 to 884.5)     | 811.3 (660.0 to 978.0)     | 0.6 (0.2 to 0.9)                               | 9.4 (3.8 to 14.8)                   |
| <b>Western Europe</b>                                                                                                                                     |                            |                            |                            |                            |                                                |                                     |
| Andorra                                                                                                                                                   | 730.0 (596.6 to 865.6)     | 707.1 (571.0 to 847.0)     | 686.2 (554.8 to 826.5)     | 664.5 (523.1 to 824.2)     | -0.4 (-0.8 to -0.1)                            | -6.1 (-10.7 to -1.6)                |
| Austria                                                                                                                                                   | 729.9 (599.0 to 864.4)     | 666.5 (539.2 to 804.9)     | 657.6 (530.1 to 796.7)     | 616.0 (478.1 to 765.9)     | -0.5 (-0.9 to -0.2)                            | -7.7 (-12.6 to -2.9)                |
| Belgium                                                                                                                                                   | 759.2 (642.8 to 879.7)     | 638.7 (528.7 to 759.6)     | 624.0 (513.5 to 745.5)     | 561.7 (446.9 to 690.1)     | -0.9 (-1.2 to -0.5)                            | -12.2 (-16.9 to -7.5)               |
| Cyprus                                                                                                                                                    | 778.4 (636.1 to 931.8)     | 679.8 (546.4 to 827.5)     | 671.9 (539.4 to 818.5)     | 613.3 (479.3 to 767.5)     | -0.7 (-1.1 to -0.3)                            | -9.6 (-14.6 to -5.0)                |
| Denmark                                                                                                                                                   | 817.7 (688.3 to 952.7)     | 784.2 (643.8 to 940.3)     | 775.5 (631.8 to 935.2)     | 765.0 (599.9 to 948.9)     | -0.2 (-0.5 to 0.2)                             | -2.6 (-7.8 to 2.7)                  |
| Finland                                                                                                                                                   | 641.2 (522.9 to 769.5)     | 566.0 (451.0 to 688.2)     | 557.9 (442.5 to 678.3)     | 513.6 (399.4 to 644.0)     | -0.7 (-1.0 to -0.3)                            | -9.4 (-14.2 to -4.5)                |
| France                                                                                                                                                    | 853.4 (713.0 to 996.8)     | 846.7 (695.1 to 1015.9)    | 850.6 (696.1 to 1024.4)    | 872.6 (693.9 to 1084.6)    | 0.2 (0.2 to 0.6)                               | 2.9 (-2.9 to 9.3)                   |
| Germany                                                                                                                                                   | 767.7 (629.4 to 908.3)     | 713.9 (576.1 to 860.5)     | 701.6 (566.5 to 845.1)     | 653.1 (514.8 to 801.0)     | -0.6 (-0.9 to -0.3)                            | -8.6 (-12.1 to -5.1)                |
| Greece                                                                                                                                                    | 609.0 (484.7 to 741.5)     | 566.8 (445.8 to 695.3)     | 568.9 (446.3 to 700.4)     | 553.9 (427.1 to 693.1)     | -0.2 (-0.4 to 0.1)                             | -2.4 (-6.2 to 1.3)                  |
| Iceland                                                                                                                                                   | 836.2 (665.8 to 1013.8)    | 744.2 (594.0 to 911.7)     | 729.0 (580.5 to 892.8)     | 669.6 (523.9 to 825.3)     | -0.7 (-1.0 to -0.5)                            | -10.1 (-13.4 to -6.9)               |
| Ireland                                                                                                                                                   | 704.6 (579.0 to 834.6)     | 581.1 (466.4 to 708.7)     | 577.9 (458.6 to 708.9)     | 533.9 (407.7 to 674.9)     | -0.6 (-1.0 to -0.2)                            | -8.3 (-14.0 to -2.3)                |
| Israel                                                                                                                                                    | 586.6 (471.8 to 707.0)     | 527.6 (411.7 to 650.7)     | 522.8 (407.1 to 648.0)     | 492.0 (373.2 to 625.0)     | -0.5 (-0.8 to -0.1)                            | -6.9 (-11.9 to -1.9)                |
| Italy                                                                                                                                                     | 800.7 (674.0 to 938.0)     | 639.7 (526.4 to 772.2)     | 627.4 (515.1 to 758.9)     | 549.0 (432.1 to 683.9)     | -1.0 (-1.4 to -0.6)                            | -14.3 (-19.0 to -9.2)               |
| Luxembourg                                                                                                                                                | 716.3 (591.8 to 851.6)     | 591.8 (481.8 to 716.7)     | 567.4 (463.0 to 687.7)     | 480.7 (378.6 to 597.5)     | -1.4 (-1.7 to -1.0)                            | -18.9 (-23.1 to -14.2)              |
| Malta                                                                                                                                                     | 701.8 (571.2 to 835.4)     | 665.2 (536.5 to 803.9)     | 666.4 (536.4 to 807.7)     | 668.4 (536.4 to 807.7)     | 0.0 (0.3 to 0.4)                               | 0.3 (-4.6 to 5.7)                   |
| Netherlands                                                                                                                                               | 797.4 (675.1 to 927.4)     | 720.8 (597.3 to 850.9)     | 711.9 (587.4 to 843.5)     | 683.6 (551.7 to 830.9)     | -0.4 (-0.7 to -0.0)                            | -5.3 (-9.9 to -0.5)                 |
| Norway                                                                                                                                                    | 691.3 (557.2 to 827.8)     | 620.9 (495.6 to 749.0)     | 609.7 (485.0 to 737.0)     | 563.5 (441.1 to 693.0)     | -0.7 (-0.9 to -0.4)                            | -9.3 (-12.6 to -5.8)                |
| Portugal                                                                                                                                                  | 777.0 (632.2 to 932.5)     | 687.2 (545.3 to 851.7)     | 681.7 (536.6 to 849.4)     | 644.0 (495.9 to 824.9)     | -0.4 (-0.8 to -0.1)                            | -6.5 (-11.2 to -1.1)                |
| Spain                                                                                                                                                     | 589.1 (490.9 to 695.1)     | 509.3 (413.8 to 616.7)     | 514.9 (415.9 to 628.0)     | 493.0 (383.4 to 620.6)     | -0.2 (-0.6 to 0.1)                             | -3.4 (-8.1 to 1.5)                  |
| Sweden                                                                                                                                                    | 617.9 (496.4 to 747.7)     | 564.3 (443.1 to 692.4)     | 555.5 (435.3 to 682.5)     | 518.1 (399.2 to 653.5)     | -0.6 (-0.8 to -0.3)                            | -8.3 (-11.9 to -4.6)                |
| Switzerland                                                                                                                                               | 873.4 (714.1 to 1033.6)    | 803.1 (638.0 to 976.5)     | 794.5 (627.0 to 972.4)     | 756.9 (578.6 to 963.0)     | -0.4 (-0.8 to 0.0)                             | -6.0 (-11.5 to 0.0)                 |
| United Kingdom                                                                                                                                            | 790.0 (672.5 to 912.2)     | 663.4 (555.0 to 777.5)     | 648.8 (540.0 to 763.4)     | 576.0 (466.4 to 692.4)     | -1.0 (-1.2 to -0.7)                            | -13.3 (-17.0 to -9.7)               |
| <b>Latin America and Caribbean</b>                                                                                                                        |                            |                            |                            |                            |                                                |                                     |



|                                               | Estimate in 2000 (95% UIs) | Estimate in 2015 (95% UIs) | Estimate in 2017 (95% UIs) | Estimate in 2030 (95% UIs) | Annualised rate of change, 2015-2030 (95% UIs) | Percent change, 2015-2030 (95% UIs) |
|-----------------------------------------------|----------------------------|----------------------------|----------------------------|----------------------------|------------------------------------------------|-------------------------------------|
| <b>Andean Latin America</b>                   |                            |                            |                            |                            |                                                |                                     |
| Bolivia                                       | 835.0 (677.0 to 999.9)     | 746.8 (601.9 to 921.7)     | 701.2 (544.3 to 869.1)     | 701.2 (544.3 to 869.1)     | -0.5 (-0.9 to -0.2)                            | -7.4 (-12.0 to -2.4)                |
| Ecuador                                       | 786.3 (657.9 to 920.4)     | 697.2 (570.0 to 826.8)     | 686.0 (557.4 to 820.1)     | 626.5 (487.8 to 770.3)     | -0.7 (-1.1 to -0.3)                            | -10.3 (-15.6 to -4.5)               |
| Peru                                          | 704.7 (564.3 to 856.9)     | 635.6 (498.9 to 780.6)     | 626.6 (490.1 to 769.8)     | 579.8 (442.0 to 729.0)     | -0.6 (-0.9 to -0.3)                            | -8.9 (-13.2 to -4.7)                |
| <b>Caribbean</b>                              |                            |                            |                            |                            |                                                |                                     |
| Antigua and Barbuda                           | 348.5 (284.6 to 422.3)     | 324.7 (255.6 to 399.2)     | 324.4 (254.2 to 400.4)     | 316.8 (241.5 to 403.2)     | -0.2 (-0.5 to 0.2)                             | -2.6 (-7.8 to 2.9)                  |
| The Bahamas                                   | 360.7 (296.6 to 433.2)     | 328.2 (262.8 to 400.2)     | 325.3 (259.9 to 396.9)     | 308.7 (242.4 to 381.1)     | -0.4 (-0.7 to -0.1)                            | -6.0 (-10.4 to -1.8)                |
| Barbados                                      | 386.3 (315.1 to 469.1)     | 356.8 (285.4 to 435.2)     | 355.6 (283.3 to 435.8)     | 345.0 (268.4 to 430.8)     | -0.2 (-0.5 to 0.0)                             | -3.4 (-7.8 to 0.6)                  |
| Belize                                        | 780.2 (670.0 to 899.2)     | 664.2 (566.5 to 772.2)     | 646.5 (548.0 to 755.0)     | 574.1 (474.2 to 691.2)     | -1.0 (-1.4 to -0.6)                            | -13.6 (-19.1 to -8.0)               |
| Bermuda                                       | 519.8 (434.4 to 609.6)     | 456.5 (370.8 to 555.0)     | 453.7 (367.6 to 556.4)     | 428.2 (331.5 to 550.9)     | -0.5 (-0.9 to 0.1)                             | -6.5 (-13.2 to 1.4)                 |
| Cuba                                          | 743.5 (646.0 to 867.8)     | 944.5 (802.3 to 1122.3)    | 976.6 (824.1 to 1163.8)    | 1136.0 (926.4 to 1379.4)   | 1.2 (0.8 to 1.6)                               | 20.1 (13.1 to 26.2)                 |
| Dominica                                      | 453.2 (368.2 to 543.8)     | 414.4 (333.7 to 498.6)     | 409.6 (329.1 to 494.0)     | 379.6 (299.1 to 468.5)     | -0.6 (-0.9 to -0.3)                            | -8.5 (-12.6 to -4.4)                |
| Dominican Republic                            | 684.4 (579.2 to 794.9)     | 658.3 (556.4 to 770.1)     | 655.8 (551.4 to 773.1)     | 639.5 (517.3 to 773.6)     | -0.2 (-0.6 to 0.2)                             | -2.9 (-9.1 to 3.1)                  |
| Grenada                                       | 450.4 (373.1 to 533.4)     | 389.5 (315.1 to 472.0)     | 390.9 (314.9 to 475.4)     | 364.9 (283.1 to 453.6)     | -0.4 (-0.9 to -0.1)                            | -6.5 (-12.0 to -1.4)                |
| Guyana                                        | 505.2 (426.2 to 595.3)     | 452.7 (375.7 to 539.3)     | 444.4 (367.1 to 531.3)     | 412.9 (334.5 to 503.5)     | -0.6 (-1.0 to -0.3)                            | -8.9 (-14.2 to -3.8)                |
| Haiti                                         | 654.2 (549.4 to 764.8)     | 565.4 (470.8 to 667.4)     | 549.2 (454.3 to 651.1)     | 499.4 (402.2 to 607.0)     | -0.8 (-1.3 to -0.4)                            | -11.8 (-17.6 to -6.0)               |
| Jamaica                                       | 556.1 (458.5 to 663.3)     | 493.1 (403.5 to 591.4)     | 486.0 (398.4 to 584.1)     | 442.9 (356.6 to 539.7)     | -0.7 (-1.1 to -0.4)                            | -10.2 (-14.8 to -5.3)               |
| Puerto Rico                                   | 278.0 (236.3 to 328.1)     | 255.6 (209.8 to 310.9)     | 254.2 (207.0 to 310.1)     | 242.9 (188.5 to 308.5)     | -0.4 (-0.9 to 0.1)                             | -5.2 (-12.4 to 2.1)                 |
| Saint Lucia                                   | 491.2 (403.3 to 583.5)     | 421.8 (341.1 to 513.8)     | 416.8 (336.5 to 510.5)     | 376.4 (294.5 to 467.8)     | -0.8 (-1.1 to -0.4)                            | -10.9 (-15.2 to -6.3)               |
| Saint Vincent and the Grenadines              | 365.3 (291.5 to 450.0)     | 350.7 (279.1 to 433.9)     | 351.1 (279.1 to 435.8)     | 348.6 (273.3 to 442.2)     | -0.0 (-0.4 to 0.3)                             | -0.6 (-5.6 to 4.5)                  |
| Suriname                                      | 413.6 (342.9 to 489.8)     | 362.9 (297.6 to 435.4)     | 363.8 (296.7 to 435.4)     | 347.9 (276.1 to 428.0)     | -0.3 (-0.6 to 0.1)                             | -4.2 (-9.1 to 1.0)                  |
| Trinidad and Tobago                           | 329.0 (266.0 to 397.5)     | 310.5 (246.5 to 380.0)     | 312.9 (248.0 to 383.4)     | 312.7 (241.4 to 388.5)     | 0.0 (0.2 to 0.3)                               | 0.6 (-3.2 to 4.1)                   |
| Virgin Islands, U.S.                          | 610.2 (515.1 to 715.1)     | 585.2 (489.1 to 691.5)     | 585.3 (489.6 to 693.0)     | 574.4 (460.4 to 697.1)     | -0.1 (-0.6 to 0.3)                             | -2.0 (-8.1 to 4.2)                  |
| <b>Central Latin America</b>                  |                            |                            |                            |                            |                                                |                                     |
| Colombia                                      | 528.2 (442.4 to 615.7)     | 413.7 (333.7 to 495.2)     | 402.1 (323.2 to 484.1)     | 337.4 (260.3 to 420.6)     | -1.4 (-1.8 to -1.0)                            | -18.6 (-23.7 to -13.6)              |
| Costa Rica                                    | 524.6 (446.0 to 615.0)     | 443.2 (370.3 to 525.5)     | 436.8 (364.0 to 519.3)     | 395.8 (322.6 to 480.6)     | -0.8 (-1.1 to -0.5)                            | -10.8 (-15.3 to -6.6)               |
| El Salvador                                   | 502.5 (419.2 to 591.0)     | 359.0 (281.9 to 442.7)     | 341.9 (266.7 to 424.5)     | 282.0 (210.9 to 359.6)     | -1.6 (-2.1 to -1.2)                            | -21.6 (-26.5 to -17.1)              |
| Guatemala                                     | 1043.5 (903.7 to 1197.3)   | 706.3 (594.2 to 827.6)     | 706.0 (562.9 to 796.4)     | 504.7 (401.3 to 621.5)     | -2.3 (-2.8 to -1.8)                            | -28.7 (-34.1 to -23.5)              |
| Honduras                                      | 747.8 (639.7 to 867.5)     | 665.6 (566.6 to 781.4)     | 651.7 (550.7 to 768.2)     | 604.9 (493.9 to 737.6)     | -0.6 (-1.1 to -0.2)                            | -9.2 (-14.6 to -3.5)                |
| Mexico                                        | 674.2 (584.2 to 773.7)     | 563.2 (479.8 to 657.0)     | 551.7 (468.8 to 647.4)     | 551.0 (398.1 to 574.9)     | -1.1 (-1.4 to -0.8)                            | -14.7 (-18.7 to -10.9)              |
| Nicaragua                                     | 574.1 (478.2 to 687.2)     | 465.0 (402.9 to 597.8)     | 465.0 (402.9 to 597.8)     | 434.6 (341.9 to 539.4)     | -0.9 (-1.3 to -0.5)                            | -12.3 (-17.5 to -7.2)               |
| Panama                                        | 489.6 (408.0 to 575.1)     | 391.6 (314.9 to 474.6)     | 381.2 (304.7 to 463.7)     | 328.8 (249.4 to 410.1)     | -1.2 (-1.7 to -0.8)                            | -16.7 (-22.1 to -11.9)              |
| Venezuela                                     | 1089.4 (960.0 to 1233.3)   | 776.6 (659.1 to 900.0)     | 749.8 (630.8 to 876.8)     | 573.4 (447.8 to 705.3)     | -2.0 (-2.7 to -1.5)                            | -26.3 (-33.0 to -19.8)              |
| <b>Tropical Latin America</b>                 |                            |                            |                            |                            |                                                |                                     |
| Brazil                                        | 846.9 (718.9 to 978.5)     | 713.8 (587.1 to 843.6)     | 703.6 (574.7 to 836.0)     | 624.2 (495.1 to 756.5)     | -0.9 (-1.3 to -0.6)                            | -12.7 (-17.3 to -8.3)               |
| Paraguay                                      | 895.3 (742.9 to 1060.4)    | 789.9 (646.4 to 949.3)     | 776.3 (632.6 to 934.4)     | 706.1 (552.7 to 866.9)     | -0.8 (-1.2 to -0.3)                            | -10.7 (-16.7 to -4.9)               |
| <b>North Africa and Middle East</b>           |                            |                            |                            |                            |                                                |                                     |
| <b>North Africa and Middle East</b>           |                            |                            |                            |                            |                                                |                                     |
| Afghanistan                                   | 1846.3 (1578.9 to 2122.1)  | 1333.2 (1129.8 to 1545.3)  | 1262.7 (1062.3 to 1470.5)  | 1150.6 (934.4 to 1393.7)   | -1.0 (-1.4 to -0.5)                            | -13.8 (-19.3 to -7.5)               |
| Algeria                                       | 672.7 (559.9 to 791.2)     | 534.2 (436.6 to 645.5)     | 523.6 (426.7 to 633.7)     | 441.5 (344.2 to 559.6)     | -1.3 (-1.8 to -0.7)                            | -17.5 (-24.2 to -9.5)               |
| Bahrain                                       | 1145.3 (952.6 to 1345.4)   | 670.3 (534.8 to 805.6)     | 653.8 (519.9 to 791.2)     | 502.1 (386.1 to 629.5)     | -1.9 (-2.4 to -1.6)                            | -25.2 (-29.9 to -20.8)              |
| Egypt                                         | 595.9 (502.1 to 704.6)     | 557.8 (458.7 to 655.1)     | 550.2 (450.8 to 658.7)     | 526.2 (417.3 to 646.7)     | -0.4 (-0.8 to -0.0)                            | -5.8 (-11.4 to -0.7)                |
| Iran                                          | 642.4 (540.5 to 749.8)     | 505.7 (423.6 to 595.5)     | 497.7 (415.6 to 586.1)     | 424.0 (345.4 to 513.2)     | -1.2 (-1.6 to -0.7)                            | -16.2 (-21.7 to -10.6)              |
| Iraq                                          | 782.3 (663.6 to 920.8)     | 633.5 (513.8 to 767.6)     | 612.3 (492.5 to 747.5)     | 514.4 (382.7 to 662.5)     | -1.4 (-2.2 to -0.7)                            | -19.0 (-27.6 to -10.2)              |
| Jordan                                        | 623.1 (516.5 to 735.6)     | 420.8 (341.2 to 503.8)     | 391.8 (315.7 to 471.3)     | 278.6 (217.2 to 345.3)     | -2.8 (-3.2 to -2.3)                            | -33.9 (-38.2 to -29.4)              |
| Kuwait                                        | 866.3 (699.5 to 1043.1)    | 572.9 (454.3 to 691.5)     | 536.6 (423.9 to 651.6)     | 412.1 (316.4 to 514.3)     | -2.2 (-2.6 to -1.8)                            | -28.2 (-32.8 to -23.4)              |
| Lebanon                                       | 660.0 (562.0 to 772.5)     | 503.8 (415.9 to 604.3)     | 490.3 (402.0 to 592.7)     | 395.1 (307.2 to 497.2)     | -1.6 (-2.2 to -1.1)                            | -21.7 (-28.1 to -15.6)              |
| Libya                                         | 610.5 (510.1 to 715.6)     | 499.5 (414.7 to 589.0)     | 487.6 (404.7 to 576.5)     | 431.7 (345.2 to 530.2)     | -1.0 (-1.5 to -0.4)                            | -13.7 (-20.7 to -6.4)               |
| Morocco                                       | 841.4 (701.9 to 981.1)     | 768.9 (627.0 to 917.4)     | 760.8 (617.4 to 912.2)     | 720.1 (557.1 to 904.5)     | -0.5 (-1.0 to 0.0)                             | -6.5 (-13.9 to 0.2)                 |
| Palestine                                     | 831.2 (703.3 to 971.4)     | 658.9 (537.0 to 796.0)     | 638.8 (518.7 to 777.4)     | 526.2 (406.5 to 674.3)     | -1.5 (-2.2 to -0.9)                            | -20.3 (-27.7 to -12.5)              |
| Oman                                          | 935.6 (785.0 to 1098.5)    | 550.6 (455.8 to 655.0)     | 511.6 (420.1 to 610.4)     | 375.2 (296.8 to 458.8)     | -2.6 (-3.0 to -2.2)                            | -31.9 (-36.0 to -28.3)              |
| Qatar                                         | 1836.1 (1546.4 to 2187.4)  | 799.5 (650.9 to 959.6)     | 742.5 (600.1 to 896.3)     | 465.8 (386.0 to 619.1)     | -3.2 (-3.6 to -2.8)                            | -38.1 (-41.8 to -34.5)              |
| Saudi Arabia                                  | 711.7 (593.2 to 840.9)     | 472.6 (386.5 to 564.4)     | 442.7 (360.4 to 531.4)     | 307.4 (237.4 to 379.3)     | -2.9 (-3.5 to -2.3)                            | -35.1 (-40.4 to -29.7)              |
| Sudan                                         | 1110.0 (943.9 to 1277.9)   | 820.3 (674.5 to 965.1)     | 780.1 (640.5 to 923.5)     | 606.9 (477.7 to 749.1)     | -2.0 (-2.6 to -1.5)                            | -26.1 (-32.6 to -19.8)              |
| Syria                                         | 760.6 (639.3 to 903.3)     | 634.6 (524.7 to 766.7)     | 623.9 (513.0 to 757.2)     | 540.1 (423.0 to 691.8)     | -1.1 (-1.6 to -0.5)                            | -15.1 (-21.9 to -7.4)               |
| Tunisia                                       | 584.8 (492.9 to 680.1)     | 479.9 (398.5 to 568.5)     | 471.7 (389.9 to 561.5)     | 414.3 (330.3 to 513.4)     | -1.0 (-1.5 to -0.5)                            | -13.8 (-19.6 to -7.6)               |
| Turkey                                        | 1260.5 (1082.8 to 1446.8)  | 876.4 (742.7 to 1025.2)    | 835.2 (703.1 to 982.5)     | 632.6 (513.6 to 774.6)     | -2.2 (-2.7 to -1.8)                            | -27.9 (-33.0 to -23.1)              |
| United Arab Emirates                          | 1331.8 (1118.5 to 1569.5)  | 711.9 (591.0 to 827.0)     | 668.2 (552.6 to 780.2)     | 481.6 (388.9 to 574.9)     | -2.6 (-3.0 to -2.2)                            | -32.4 (-36.4 to -28.1)              |
| Yemen                                         | 1253.0 (1078.5 to 1443.2)  | 866.1 (732.8 to 1006.0)    | 825.6 (692.8 to 964.5)     | 625.4 (497.6 to 766.3)     | -2.2 (-2.8 to -1.6)                            | -27.9 (-34.6 to -20.8)              |
| <b>South Asia</b>                             |                            |                            |                            |                            |                                                |                                     |
| <b>South Asia</b>                             |                            |                            |                            |                            |                                                |                                     |
| Bangladesh                                    | 1689.3 (1443.8 to 1930.4)  | 1234.8 (1032.9 to 1447.1)  | 1191.1 (993.2 to 1403.6)   | 970.2 (773.3 to 1187.6)    | -1.6 (-2.1 to -1.1)                            | -21.6 (-27.5 to -15.5)              |
| Bhutan                                        | 1818.3 (1550.0 to 2132.9)  | 1229.0 (1015.4 to 1461.4)  | 1172.2 (962.5 to 1399.8)   | 853.9 (679.7 to 1048.8)    | -2.4 (-2.8 to -2.0)                            | -30.6 (-34.5 to -26.4)              |
| India                                         | 1328.7 (1166.3 to 1503.8)  | 951.0 (825.7 to 1086.4)    | 912.9 (791.2 to 1048.1)    | 699.1 (592.1 to 821.0)     | -2.1 (-2.4 to -1.7)                            | -26.5 (-30.3 to -22.5)              |
| Nepal                                         | 1976.8 (1701.0 to 2258.3)  | 1573.5 (1325.1 to 1845.5)  | 1529.3 (1282.4 to 1803.3)  | 1317.9 (1062.8 to 1605.9)  | -1.2 (-1.6 to -0.8)                            | -16.4 (-21.4 to -11.5)              |
| Pakistan                                      | 1110.4 (954.4 to 1284.3)   | 904.6 (766.0 to 1063.8)    | 870.8 (733.6 to 1027.3)    | 738.1 (604.1 to 911.0)     | -1.4 (-1.8 to -0.9)                            | -18.5 (-24.0 to -12.8)              |
| <b>Southeast Asia, East Asia, and Oceania</b> |                            |                            |                            |                            |                                                |                                     |
| <b>East Asia</b>                              |                            |                            |                            |                            |                                                |                                     |
| China                                         | 1280.8 (1121.9 to 1440.9)  | 835.6 (708.9 to 959.1)     | 794.3 (672.4 to 915.5)     | 582.4 (474.4 to 696.6)     | -2.4 (-2.8 to -2.0)                            | -30.4 (-34.5 to -26.0)              |
| North Korea                                   | 1375.6 (1192.8 to 1603.3)  | 1227.7 (1046.7 to 1415.2)  | 1213.4 (1046.7 to 1398.0)  | 1123.1 (939.3 to 1315.7)   | -0.6 (-1.0 to -0.2)                            | -8.6 (-14.1 to -3.3)                |
| Taiwan (Province of China)                    | 569.5 (488.7 to 655.5)     | 477.9 (401.3 to 562.6)     | 473.4 (396.4 to 558.4)     | 438.1 (357.2 to 529.2)     | -0.6 (-0.9 to -0.3)                            | -8.4 (-12.8 to -4.0)                |
| <b>Oceania</b>                                |                            |                            |                            |                            |                                                |                                     |
| American Samoa                                | 664.0 (576.2 to 761.9)     | 621.6 (524.6 to 726.1)     | 608.2 (510.9 to 713.8)     | 571.6 (466.1 to 690.9)     | -0.6 (-1.0 to -0.2)                            | -8.2 (-13.5 to -2.7)                |
| Federated States of Micronesia                | 895.7 (775.2 to 1018.8)    | 714.7 (604.1 to 831.0)     | 681.9 (572.6 to 797.3)     | 570.4 (455.0 to 686.0)     | -1.5 (-2.0 to -1.0)                            | -20.3 (-26.1 to -14.2)              |
| Fiji                                          | 662.1 (570.5 to 760.5)     | 535.2 (454.1 to 625.0)     | 526.0 (443.0 to 616.9)     | 452.6 (367.1 to 547.3)     | -1.1 (-1.6 to -0.7)                            | -15.5 (-20.9 to -10.3)              |
| Guam                                          | 560.8 (482.3 to 650.2)     | 510.1 (431.6 to 596.8)     | 504.6 (425.2 to 589.8)     | 467.7 (385.2 to 560.1)     | -0.6 (-0.9 to -0.3)                            | -8.4 (-12.7 to -4.0)                |
| Kiribati                                      | 665.5 (575.9 to 769.5)     | 592.7 (499.1 to 692.4)     | 589.4 (492.9 to 690.1)     | 567.5 (454.0 to 693.8)     | -0.3 (-0.8 to 0.2)                             | -4.4 (-11.6 to 2.8)                 |
| Marshall Islands                              | 946.2 (824.5 to 1080.8)    | 719.2 (613.8 to 835.5)     | 689.5 (585.2 to 801.2)     | 560.7 (461.3 to 671.5)     | -1.7 (-2.1 to -1.3)                            | -22.1 (-27.2 to -17.2)              |
| Northern Mariana Islands                      | 534.5 (450.7 to 624.6)     | 492.8 (408.6 to 585.5)     | 479.4 (398.0 to 571.4)     | 412.8 (333.9 to 499.4)     | -1.2 (-1.4 to -1.0)                            | -13.6 (-19.2 to -8.0)               |
| Papua New Guinea                              | 1843.4 (1607.3 to 2107.1)  | 1428.8 (1238.8 to 1634.9)  | 1369.8 (1180.8 to 1573.6)  | 1142.1 (948.7 to 1345.4)   | -1.5 (-1.9 to -1.1)                            | -20.1 (-25.3 to -15.0)              |

|                                                                                                                                  | Estimate in 2000 (95% UIs) | Estimate in 2015 (95% UIs) | Estimate in 2017 (95% UIs) | Estimate in 2020 (95% UIs) | Annualised rate of change, 2015-2020 (95% UIs) | Percent change, 2015-2020 (95% UIs) |
|----------------------------------------------------------------------------------------------------------------------------------|----------------------------|----------------------------|----------------------------|----------------------------|------------------------------------------------|-------------------------------------|
| Samoa                                                                                                                            | 709.5 (586.3 to 832.5)     | 558.0 (450.4 to 668.7)     | 542.7 (455.9 to 652.3)     | 464.1 (361.9 to 574.4)     | -1.2 (-1.6 to -0.8)                            | -17.0 (-21.8 to -11.6)              |
| Solomon Islands                                                                                                                  | 744.9 (645.5 to 859.6)     | 623.3 (528.3 to 725.5)     | 604.6 (510.9 to 706.3)     | 530.4 (420.8 to 639.6)     | -1.1 (-1.5 to -0.6)                            | -14.9 (-20.7 to -8.8)               |
| Tonga                                                                                                                            | 713.4 (605.6 to 823.4)     | 640.9 (536.6 to 758.7)     | 634.9 (526.2 to 754.3)     | 600.8 (484.4 to 737.6)     | -0.4 (-0.9 to -0.1)                            | -6.4 (-12.1 to -0.8)                |
| Vanuatu                                                                                                                          | 1533.7 (1312.0 to 1775.4)  | 1254.0 (1047.7 to 1484.4)  | 1227.1 (1021.9 to 1460.5)  | 1061.6 (848.6 to 1299.9)   | -1.1 (-1.5 to -0.7)                            | -15.5 (-20.6 to -10.5)              |
| <b>Southeast Asia</b>                                                                                                            |                            |                            |                            |                            |                                                |                                     |
| Cambodia                                                                                                                         | 1632.2 (1382.9 to 1897.2)  | 1225.8 (1012.0 to 1452.1)  | 1183.6 (972.1 to 1412.1)   | 943.2 (751.6 to 1152.6)    | -1.8 (-2.1 to -1.4)                            | -23.2 (-27.4 to -19.3)              |
| Indonesia                                                                                                                        | 1409.4 (1214.4 to 1626.5)  | 1113.0 (940.0 to 1311.5)   | 1077.8 (905.6 to 1275.0)   | 896.5 (718.1 to 1090.5)    | -1.5 (-1.9 to -1.0)                            | -19.6 (-24.7 to -14.3)              |
| Laos                                                                                                                             | 1382.3 (1171.7 to 1613.6)  | 1084.6 (894.0 to 1284.4)   | 1043.9 (854.2 to 1242.8)   | 849.6 (672.2 to 1042.3)    | -1.6 (-2.0 to -1.2)                            | -21.8 (-26.4 to -16.8)              |
| Malaysia                                                                                                                         | 732.5 (630.8 to 841.3)     | 600.8 (504.7 to 697.2)     | 588.5 (492.0 to 685.0)     | 498.8 (403.5 to 597.2)     | -1.3 (-1.7 to -0.9)                            | -17.1 (-22.3 to -12.1)              |
| Maldives                                                                                                                         | 1084.1 (919.6 to 1262.9)   | 662.3 (542.4 to 791.6)     | 609.5 (495.6 to 728.6)     | 401.2 (313.5 to 502.2)     | -3.4 (-3.8 to -2.9)                            | -59.5 (-64.4 to -54.7)              |
| Mauritius                                                                                                                        | 492.6 (404.4 to 584.0)     | 412.8 (329.4 to 495.9)     | 407.2 (323.1 to 458.1)     | 369.2 (283.5 to 458.1)     | -0.8 (-1.0 to -0.5)                            | -10.7 (-14.5 to -6.9)               |
| Myanmar                                                                                                                          | 1177.6 (999.8 to 1371.8)   | 1008.9 (854.6 to 1171.6)   | 964.8 (828.5 to 1150.8)    | 882.9 (720.8 to 1064.7)    | -0.9 (-1.4 to -0.4)                            | -12.6 (-18.6 to -6.8)               |
| Philippines                                                                                                                      | 908.0 (760.9 to 1067.4)    | 801.3 (667.0 to 948.3)     | 791.9 (657.8 to 939.9)     | 724.9 (598.0 to 870.6)     | -0.7 (-1.0 to -0.4)                            | -9.6 (-13.5 to -5.6)                |
| Sri Lanka                                                                                                                        | 692.4 (579.7 to 816.1)     | 600.9 (492.5 to 722.5)     | 592.2 (482.9 to 715.5)     | 538.1 (422.3 to 667.6)     | -0.7 (-1.1 to -0.4)                            | -10.6 (-15.4 to -5.9)               |
| Seychelles                                                                                                                       | 744.2 (615.0 to 886.6)     | 600.2 (491.2 to 710.1)     | 586.5 (478.6 to 696.9)     | 497.7 (392.4 to 601.6)     | -1.3 (-1.6 to -0.9)                            | -17.1 (-21.2 to -13.2)              |
| Thailand                                                                                                                         | 1193.0 (1013.0 to 1375.2)  | 904.9 (745.5 to 1065.6)    | 881.5 (719.0 to 1045.0)    | 720.0 (562.2 to 877.1)     | -1.5 (-2.0 to -1.1)                            | -20.6 (-25.4 to -15.8)              |
| Timor-Leste                                                                                                                      | 1215.8 (1029.4 to 1396.9)  | 887.4 (732.4 to 1035.7)    | 849.1 (695.5 to 995.0)     | 678.5 (539.6 to 817.7)     | -1.8 (-2.2 to -1.4)                            | -23.6 (-28.5 to -19.0)              |
| Vietnam                                                                                                                          | 1040.0 (883.2 to 1205.2)   | 866.1 (721.1 to 1018.2)    | 847.0 (703.4 to 998.6)     | 760.9 (614.4 to 915.5)     | -0.9 (-1.2 to -0.5)                            | -12.2 (-16.9 to -7.8)               |
| <b>Sub-Saharan Africa</b>                                                                                                        |                            |                            |                            |                            |                                                |                                     |
| <b>Central Sub-Saharan Africa</b>                                                                                                |                            |                            |                            |                            |                                                |                                     |
| Angola                                                                                                                           | 1464.5 (1253.1 to 1689.1)  | 992.7 (828.1 to 1175.4)    | 938.0 (774.1 to 1118.9)    | 694.5 (554.0 to 858.7)     | -2.4 (-2.9 to -1.9)                            | -30.2 (-35.4 to -24.9)              |
| Central African Republic                                                                                                         | 1504.7 (1310.7 to 1731.2)  | 1297.1 (1118.1 to 1505.6)  | 1253.9 (1078.1 to 1464.9)  | 1089.7 (905.0 to 1318.0)   | -2.2 (-2.7 to -0.7)                            | -16.1 (-22.0 to -9.9)               |
| Congo                                                                                                                            | 1131.4 (963.1 to 1317.6)   | 854.2 (717.6 to 1010.9)    | 820.4 (685.7 to 977.0)     | 653.5 (526.6 to 800.0)     | -1.8 (-2.3 to -1.3)                            | -23.6 (-29.2 to -18.0)              |
| Democratic Republic of the Congo                                                                                                 | 1465.6 (1245.1 to 1697.9)  | 1251.9 (1049.2 to 1489.7)  | 1211.8 (1013.9 to 1451.7)  | 1058.5 (848.6 to 1302.5)   | -1.1 (-1.7 to -0.6)                            | -15.6 (-22.1 to -8.5)               |
| Equatorial Guinea                                                                                                                | 1312.1 (1119.9 to 1519.9)  | 724.9 (597.8 to 868.2)     | 665.5 (542.8 to 799.7)     | 403.1 (309.4 to 507.4)     | -3.9 (-4.5 to -3.3)                            | -44.5 (-49.0 to -39.4)              |
| Gabon                                                                                                                            | 841.1 (716.0 to 979.8)     | 638.0 (529.0 to 753.7)     | 608.9 (501.9 to 722.4)     | 494.9 (394.0 to 610.0)     | -1.7 (-2.1 to -1.3)                            | -22.5 (-27.4 to -17.5)              |
| <b>Eastern Sub-Saharan Africa</b>                                                                                                |                            |                            |                            |                            |                                                |                                     |
| Burundi                                                                                                                          | 1821.1 (1556.9 to 2108.1)  | 1486.6 (1231.0 to 1747.3)  | 1432.7 (1183.2 to 1691.1)  | 1215.5 (969.6 to 1486.5)   | -1.4 (-1.8 to -0.9)                            | -18.4 (-23.3 to -13.3)              |
| Comoros                                                                                                                          | 1366.5 (1138.1 to 1613.8)  | 1197.6 (966.4 to 1441.3)   | 1171.7 (940.7 to 1415.4)   | 1054.5 (815.7 to 1303.5)   | -0.9 (-1.3 to -0.5)                            | -12.1 (-17.3 to -7.0)               |
| Djibouti                                                                                                                         | 1055.4 (868.7 to 1256.6)   | 824.1 (669.4 to 986.2)     | 793.9 (641.8 to 956.5)     | 652.4 (509.8 to 812.1)     | -1.6 (-2.0 to -1.2)                            | -20.9 (-25.5 to -16.0)              |
| Eritrea                                                                                                                          | 1409.2 (1220.9 to 1628.7)  | 1026.8 (868.9 to 1216.0)   | 987.4 (832.8 to 1176.4)    | 806.9 (653.5 to 981.4)     | -1.6 (-2.1 to -1.2)                            | -21.6 (-26.6 to -16.8)              |
| Ethiopia                                                                                                                         | 1715.6 (1442.3 to 2018.1)  | 1349.4 (1106.8 to 1619.1)  | 1286.3 (1049.6 to 1544.5)  | 1032.0 (813.9 to 1290.3)   | -1.8 (-2.3 to -1.3)                            | -23.7 (-29.3 to -18.2)              |
| Kenya                                                                                                                            | 1354.7 (1109.0 to 1612.1)  | 1141.3 (927.3 to 1366.7)   | 1100.1 (890.5 to 1320.7)   | 937.3 (745.8 to 1147.3)    | -1.3 (-1.6 to -1.0)                            | -17.9 (-21.8 to -13.9)              |
| Madagascar                                                                                                                       | 2026.4 (1713.4 to 2369.3)  | 1675.1 (1384.4 to 1971.8)  | 1612.0 (1331.4 to 1910.0)  | 1361.9 (1101.0 to 1661.7)  | -1.4 (-1.8 to -1.0)                            | -18.8 (-23.1 to -13.8)              |
| Malawi                                                                                                                           | 1454.2 (1207.2 to 1722.2)  | 1202.2 (992.7 to 1437.0)   | 1147.8 (946.3 to 1370.5)   | 972.1 (773.8 to 1191.7)    | -1.4 (-1.9 to -1.0)                            | -19.2 (-24.7 to -13.5)              |
| Mozambique                                                                                                                       | 1597.8 (1339.2 to 1862.8)  | 1243.9 (1031.2 to 1477.2)  | 1175.9 (971.2 to 1403.8)   | 942.7 (753.6 to 1151.6)    | -1.9 (-2.2 to -1.5)                            | -24.3 (-28.6 to -20.1)              |
| Rwanda                                                                                                                           | 1938.3 (1628.4 to 2251.6)  | 1317.6 (1082.3 to 1576.4)  | 1240.4 (1012.3 to 1489.3)  | 902.2 (705.1 to 1115.9)    | -2.5 (-2.9 to -2.1)                            | -31.6 (-35.7 to -27.5)              |
| Somalia                                                                                                                          | 1882.1 (1602.9 to 2187.0)  | 1631.8 (1381.9 to 1919.8)  | 1577.4 (1330.7 to 1860.5)  | 1470.6 (1199.3 to 1768.5)  | -0.7 (-1.1 to -0.3)                            | -10.0 (-14.6 to -5.0)               |
| South Sudan                                                                                                                      | 1640.4 (1373.5 to 1951.6)  | 1474.5 (1223.3 to 1748.0)  | 1462.9 (1209.1 to 1735.5)  | 1380.0 (1124.8 to 1669.3)  | -0.5 (-0.9 to -0.1)                            | -6.5 (-12.5 to -1.1)                |
| Tanzania                                                                                                                         | 1372.7 (1130.4 to 1637.6)  | 1171.2 (954.2 to 1420.8)   | 1132.1 (918.0 to 1379.0)   | 981.7 (770.8 to 1234.3)    | -1.2 (-1.6 to -0.8)                            | -16.3 (-21.4 to -11.0)              |
| Uganda                                                                                                                           | 1476.0 (1212.0 to 1749.2)  | 1212.4 (989.2 to 1448.8)   | 1212.4 (989.2 to 1396.9)   | 979.2 (777.2 to 1211.1)    | -1.4 (-1.8 to -1.0)                            | -19.3 (-24.1 to -13.7)              |
| Zambia                                                                                                                           | 1295.8 (1081.2 to 1518.7)  | 1122.0 (911.3 to 1343.7)   | 1073.2 (868.0 to 1290.1)   | 937.8 (741.0 to 1164.8)    | -1.2 (-1.6 to -0.8)                            | -16.5 (-21.0 to -11.8)              |
| <b>Southern Sub-Saharan Africa</b>                                                                                               |                            |                            |                            |                            |                                                |                                     |
| Botswana                                                                                                                         | 926.7 (788.0 to 1076.6)    | 733.3 (608.7 to 871.8)     | 700.8 (578.7 to 836.1)     | 557.8 (448.5 to 676.9)     | -1.8 (-2.2 to -1.5)                            | -24.0 (-28.4 to -19.8)              |
| Lesotho                                                                                                                          | 1046.7 (903.6 to 1192.2)   | 899.1 (771.2 to 1030.4)    | 866.1 (740.5 to 997.3)     | 763.2 (627.3 to 905.7)     | -1.1 (-1.6 to -0.6)                            | -15.2 (-20.9 to -9.2)               |
| Namibia                                                                                                                          | 838.9 (697.1 to 993.5)     | 727.8 (593.8 to 870.8)     | 701.9 (570.1 to 843.1)     | 605.7 (477.9 to 738.0)     | -1.2 (-1.6 to -0.9)                            | -16.9 (-21.0 to -12.9)              |
| South Africa                                                                                                                     | 861.6 (752.8 to 982.6)     | 727.6 (627.9 to 841.3)     | 705.2 (607.1 to 817.4)     | 607.4 (511.8 to 719.2)     | -1.2 (-1.6 to -0.9)                            | -16.6 (-20.9 to -12.5)              |
| Swaziland                                                                                                                        | 954.0 (815.2 to 1100.8)    | 798.0 (674.2 to 929.5)     | 760.0 (634.8 to 887.8)     | 620.9 (509.8 to 745.6)     | -1.7 (-2.2 to -1.2)                            | -22.3 (-27.5 to -17.0)              |
| Zimbabwe                                                                                                                         | 1139.6 (953.3 to 1328.3)   | 1103.4 (914.0 to 1307.0)   | 1059.5 (877.1 to 1261.1)   | 984.0 (795.9 to 1198.1)    | -0.8 (-1.1 to -0.5)                            | -10.9 (-15.2 to -7.0)               |
| <b>Western Sub-Saharan Africa</b>                                                                                                |                            |                            |                            |                            |                                                |                                     |
| Benin                                                                                                                            | 1230.2 (1018.6 to 1456.1)  | 1049.2 (858.1 to 1259.8)   | 1012.2 (827.0 to 1216.9)   | 873.4 (689.5 to 1074.4)    | -1.2 (-1.6 to -0.9)                            | -16.8 (-20.9 to -12.8)              |
| Burkina Faso                                                                                                                     | 1109.3 (896.9 to 1337.5)   | 957.7 (769.7 to 1164.7)    | 926.7 (744.6 to 1127.6)    | 820.9 (641.4 to 1012.5)    | -1.0 (-1.3 to -0.8)                            | -14.4 (-18.1 to -10.9)              |
| Cameroon                                                                                                                         | 1282.2 (1064.8 to 1511.4)  | 1082.1 (879.4 to 1295.7)   | 1042.6 (843.1 to 1252.9)   | 892.7 (701.2 to 1096.6)    | -1.3 (-1.6 to -1.0)                            | -17.6 (-21.4 to -13.9)              |
| Cape Verde                                                                                                                       | 888.9 (710.0 to 1082.8)    | 688.7 (540.0 to 852.2)     | 665.5 (516.3 to 826.4)     | 560.8 (414.4 to 719.7)     | -1.4 (-1.8 to -1.0)                            | -18.7 (-23.6 to -13.9)              |
| Chad                                                                                                                             | 1275.5 (1060.2 to 1511.3)  | 1141.4 (935.1 to 1366.3)   | 1104.5 (903.9 to 1326.0)   | 983.3 (792.6 to 1209.4)    | -1.0 (-1.3 to -0.7)                            | -13.9 (-18.2 to -9.3)               |
| Cote d'Ivoire                                                                                                                    | 971.5 (797.8 to 1148.8)    | 917.1 (737.9 to 1098.8)    | 898.4 (719.9 to 1079.0)    | 838.9 (647.1 to 1038.0)    | -0.6 (-1.0 to -0.3)                            | -8.6 (-13.5 to -3.8)                |
| The Gambia                                                                                                                       | 903.7 (744.5 to 1073.4)    | 800.7 (639.9 to 958.6)     | 780.0 (619.7 to 936.1)     | 701.6 (546.2 to 864.0)     | -0.9 (-1.3 to -0.6)                            | -12.5 (-17.2 to -7.9)               |
| Ghana                                                                                                                            | 916.8 (747.7 to 1093.8)    | 801.4 (648.9 to 960.6)     | 778.0 (628.1 to 934.3)     | 693.9 (552.7 to 849.5)     | -1.0 (-1.2 to -0.7)                            | -13.5 (-16.9 to -10.1)              |
| Guinea                                                                                                                           | 1296.8 (1078.7 to 1510.1)  | 1186.2 (969.4 to 1401.6)   | 1156.2 (938.3 to 1373.8)   | 1071.0 (855.9 to 1307.3)   | -0.7 (-1.1 to -0.3)                            | -9.8 (-15.0 to -5.0)                |
| Guinea-Bissau                                                                                                                    | 1120.8 (940.4 to 1317.0)   | 962.0 (782.9 to 1146.1)    | 929.5 (753.0 to 1111.6)    | 811.7 (638.2 to 989.4)     | -1.1 (-1.5 to -0.8)                            | -15.7 (-20.7 to -11.2)              |
| Liberia                                                                                                                          | 1021.5 (839.9 to 1223.9)   | 899.2 (729.5 to 1090.3)    | 872.4 (705.2 to 1062.9)    | 776.5 (617.7 to 958.6)     | -1.0 (-1.3 to -0.6)                            | -13.7 (-17.9 to -9.2)               |
| Mali                                                                                                                             | 1282.8 (1087.1 to 1493.2)  | 1072.7 (882.2 to 1274.8)   | 1033.2 (846.9 to 1234.7)   | 888.1 (707.5 to 1097.5)    | -1.3 (-1.7 to -0.9)                            | -17.3 (-22.2 to -12.8)              |
| Mauritania                                                                                                                       | 774.1 (628.2 to 931.0)     | 675.2 (542.3 to 821.9)     | 656.9 (524.8 to 803.0)     | 593.9 (454.1 to 743.8)     | -0.9 (-1.3 to -0.5)                            | -12.2 (-17.5 to -7.0)               |
| Niger                                                                                                                            | 1427.7 (1193.3 to 1672.5)  | 1234.2 (1005.7 to 1479.9)  | 1194.0 (973.2 to 1439.2)   | 1058.3 (838.7 to 1305.3)   | -1.0 (-1.5 to -0.6)                            | -14.4 (-19.7 to -9.1)               |
| Nigeria                                                                                                                          | 938.6 (749.3 to 1140.5)    | 837.7 (653.5 to 1029.3)    | 813.8 (635.1 to 1002.6)    | 745.6 (567.1 to 933.4)     | -0.8 (-1.1 to -0.5)                            | -11.1 (-15.8 to -6.9)               |
| Sao Tome and Principe                                                                                                            | 822.3 (688.5 to 963.8)     | 694.1 (576.6 to 819.0)     | 669.1 (555.0 to 790.0)     | 587.4 (477.9 to 700.4)     | -1.1 (-1.5 to -0.8)                            | -15.4 (-20.2 to -10.7)              |
| Senegal                                                                                                                          | 907.8 (756.0 to 1075.3)    | 805.9 (657.4 to 967.6)     | 789.0 (643.6 to 950.3)     | 718.6 (563.8 to 894.3)     | -0.8 (-1.1 to -0.4)                            | -10.9 (-15.6 to -6.1)               |
| Sierra Leone                                                                                                                     | 1161.6 (966.7 to 1361.1)   | 916.7 (745.8 to 1089.8)    | 880.1 (714.8 to 1049.8)    | 730.4 (579.4 to 888.4)     | -1.5 (-1.9 to -1.2)                            | -20.4 (-24.5 to -16.6)              |
| Togo                                                                                                                             | 1149.9 (952.0 to 1358.5)   | 994.0 (811.5 to 1196.2)    | 965.5 (785.0 to 1166.4)    | 853.0 (673.9 to 1060.5)    | -1.0 (-1.4 to -0.6)                            | -14.3 (-19.6 to -9.1)               |
| <b>Indicator 11.6.2: Population-weighted mean levels of fine particulate matter smaller than 2.5 microns in diameter (PM2.5)</b> |                            |                            |                            |                            |                                                |                                     |
| <b>Central Europe, Eastern Europe, and Central Asia</b>                                                                          |                            |                            |                            |                            |                                                |                                     |
| <b>Central Asia</b>                                                                                                              |                            |                            |                            |                            |                                                |                                     |
| Armenia                                                                                                                          | 36.8 (18.7 to 65.1)        | 34.9 (17.7 to 62.0)        | 32.5 (16.2 to 59.5)        | 31.8 (11.8 to 69.7)        | -1.0 (-6.8 to 4.9)                             | -3.9 (-64.1 to 107.2)               |
| Azerbaijan                                                                                                                       | 22.9 (9.9 to 41.8)         | 21.4 (8.7 to 41.6)         | 19.9 (8.1 to 41.1)         | 20.2 (4.7 to 57.0)         | -1.1 (-10.2 to 8.4)                            | 9.6 (-78.5 to 254.4)                |
| Georgia                                                                                                                          | 25.3 (13.2 to 41.8)        | 24.2 (11.7 to 40.9)        | 22.2 (11.3 to 37.0)        | 21.2 (7.5 to 43.1)         | -1.2 (-7.5 to 5.1)                             | -5.9 (-67.6 to 115.4)               |
| Kazakhstan                                                                                                                       | 15.9 (3.5 to 44.2)         | 14.4 (3.3 to 36.5)         | 13.8 (3.1 to 37.7)         | 15.1 (1.6 to 50.9)         | -1.0 (-15.1 to 13.6)                           | 52.6 (-89.6 to 666.5)               |
| Kyrgyzstan                                                                                                                       | 27.1 (9.6 to 70.3)         | 24.3 (8.7 to 61.2)         | 22.7 (7.8 to 54.6)         | 25.5 (4.4 to 95.6)         | -1.0 (-11.4 to 9.4)                            | 15.1 (-82.0 to 311.0)               |
| Mongolia                                                                                                                         | 39.0 (7.8 to 81.0)         | 42.5 (9.1 to 79.0)         | 40.1 (9.1 to 73.0)         | 45.8 (5.4 to 107.3)        | -0.1 (-12.0 to 10.5)                           | 35.6 (-83.4 to 382.7)               |
| Tajikistan                                                                                                                       | 51.2 (16.7 to 114.4)       | 47.8 (16.4 to 106.6)       | 46.1 (15.0 to 105.6)       | 49.6 (8.2 to 157.1)        | -0.8 (-11.4 to 10.2)                           | 24.0 (-82.0 to 364.8)               |
| Turkmenistan                                                                                                                     | 25.5 (8.3 to 59.1)         | 23.0 (7.1 to 51.6)         | 21.8 (7.1 to 45.4)         | 22.7 (4.4 to 64.7)         | -0.9 (-11.6 to 9.4)                            | 21.5 (-82.3 to 308.0)               |

|                                    | Estimate in 2000 (95% UIs) | Estimate in 2015 (95% UIs) | Estimate in 2017 (95% UIs) | Estimate in 2030 (95% UIs) | Annualised rate of change, 2015-2030 (95% UIs) | Percent change, 2015-2030 (95% UIs) |
|------------------------------------|----------------------------|----------------------------|----------------------------|----------------------------|------------------------------------------------|-------------------------------------|
| Uzbekistan                         | 31.9 (8.4 to 78.0)         | 30.4 (8.0 to 68.9)         | 28.5 (7.6 to 61.6)         | 29.6 (7.4 to 87.7)         | -1.1 (-12.5 to 10.1)                           | 22.9 (-84.6 to 353.0)               |
| <b>Central Europe</b>              |                            |                            |                            |                            |                                                |                                     |
| Albania                            | 22.0 (15.0 to 31.6)        | 19.5 (13.2 to 28.4)        | 18.2 (12.1 to 27.4)        | 16.8 (8.4 to 31.9)         | -1.3 (-6.2 to 4.1)                             | -11.7 (-60.5 to 86.1)               |
| Bosnia and Herzegovina             | 33.2 (16.0 to 53.4)        | 29.6 (14.9 to 52.0)        | 27.9 (13.9 to 45.7)        | 27.9 (13.9 to 59.3)        | -0.9 (-7.5 to 4.3)                             | -3.5 (-67.5 to 92.0)                |
| Bulgaria                           | 24.1 (15.7 to 36.1)        | 20.8 (13.0 to 31.8)        | 19.1 (12.0 to 30.6)        | 16.7 (8.0 to 32.5)         | -1.8 (-7.6 to 4.1)                             | -15.3 (-68.2 to 86.0)               |
| Croatia                            | 21.5 (13.0 to 34.6)        | 19.2 (11.3 to 30.7)        | 17.9 (10.8 to 28.1)        | 16.9 (7.0 to 35.1)         | -1.2 (-7.2 to 4.4)                             | -8.3 (-66.1 to 94.6)                |
| Czech Republic                     | 20.4 (13.2 to 36.4)        | 17.4 (11.4 to 30.3)        | 16.1 (10.7 to 27.8)        | 13.6 (7.0 to 28.9)         | -1.9 (-6.7 to 3.3)                             | -19.3 (-63.3 to 63.8)               |
| Hungary                            | 19.0 (13.8 to 25.6)        | 17.2 (12.3 to 23.5)        | 15.9 (11.5 to 21.9)        | 15.9 (8.4 to 21.3)         | -1.5 (-4.8 to 2.0)                             | -17.9 (-51.3 to 35.4)               |
| Macedonia                          | 36.4 (22.9 to 63.5)        | 32.0 (19.5 to 54.5)        | 29.7 (17.9 to 51.0)        | 25.9 (12.7 to 49.4)        | -1.6 (-5.6 to 2.3)                             | -17.5 (-56.7 to 41.3)               |
| Montenegro                         | 26.0 (17.8 to 38.1)        | 22.6 (15.7 to 32.5)        | 20.8 (14.4 to 29.7)        | 18.1 (9.8 to 31.7)         | -1.7 (-5.6 to 2.7)                             | -18.0 (-57.1 to 49.5)               |
| Poland                             | 25.8 (14.6 to 41.2)        | 22.7 (11.9 to 36.4)        | 20.9 (11.2 to 33.3)        | 18.2 (7.3 to 35.1)         | -1.7 (-8.0 to 4.1)                             | -15.4 (-70.1 to 85.0)               |
| Romania                            | 17.7 (11.2 to 27.2)        | 15.4 (9.8 to 23.0)         | 14.6 (9.1 to 21.6)         | 12.9 (6.3 to 22.1)         | -1.4 (-6.3 to 3.3)                             | -13.5 (-61.0 to 64.3)               |
| Serbia                             | 29.2 (17.5 to 42.1)        | 26.9 (16.1 to 39.4)        | 24.7 (14.3 to 35.5)        | 22.8 (9.9 to 39.9)         | -1.4 (-6.6 to 4.1)                             | -12.0 (-62.6 to 85.6)               |
| Slovakia                           | 21.7 (16.0 to 29.0)        | 18.8 (13.7 to 24.6)        | 17.6 (13.1 to 23.1)        | 15.0 (9.3 to 23.7)         | -1.6 (-5.0 to 2.1)                             | -18.5 (-52.7 to 36.6)               |
| Slovenia                           | 19.1 (13.4 to 25.8)        | 17.1 (11.6 to 23.5)        | 16.0 (11.3 to 21.6)        | 13.8 (8.4 to 21.3)         | -1.5 (-4.7 to 1.8)                             | -17.8 (-50.5 to 30.5)               |
| <b>Eastern Europe</b>              |                            |                            |                            |                            |                                                |                                     |
| Belarus                            | 22.6 (13.8 to 37.2)        | 20.1 (12.4 to 31.4)        | 18.8 (11.3 to 29.8)        | 17.2 (7.9 to 34.3)         | -1.4 (-6.6 to 4.1)                             | -12.0 (-62.8 to 85.6)               |
| Estonia                            | 8.2 (6.0 to 11.1)          | 7.0 (5.0 to 9.5)           | 6.7 (4.8 to 9.1)           | 5.9 (3.4 to 9.4)           | -1.3 (-5.1 to 2.7)                             | -14.0 (-53.7 to 80.7)               |
| Latvia                             | 16.7 (10.0 to 29.6)        | 14.0 (8.3 to 24.9)         | 13.4 (7.8 to 23.9)         | 11.7 (5.4 to 25.3)         | -1.4 (-5.7 to 2.1)                             | -15.9 (-57.3 to 37.6)               |
| Lithuania                          | 14.4 (10.7 to 20.4)        | 12.5 (9.1 to 17.9)         | 11.8 (8.6 to 16.3)         | 10.3 (6.2 to 16.4)         | -1.4 (-4.5 to 1.8)                             | -16.6 (-49.3 to 30.9)               |
| Moldova                            | 19.6 (11.8 to 29.8)        | 17.1 (10.5 to 29.8)        | 16.2 (9.9 to 26.0)         | 14.5 (6.3 to 28.6)         | -1.4 (-7.3 to 4.1)                             | -11.2 (-66.7 to 84.3)               |
| Russia                             | 19.1 (14.9 to 24.3)        | 17.0 (13.0 to 21.6)        | 16.2 (12.7 to 20.2)        | 14.2 (10.5 to 19.0)        | -1.2 (-3.2 to 0.8)                             | -16.0 (-37.9 to 12.9)               |
| Ukraine                            | 24.2 (10.6 to 50.6)        | 21.2 (9.7 to 42.7)         | 20.3 (9.2 to 44.0)         | 19.5 (5.2 to 54.2)         | -1.4 (-10.4 to 7.9)                            | 2.9 (-78.9 to 228.1)                |
| <b>High-income</b>                 |                            |                            |                            |                            |                                                |                                     |
| <b>Australasia</b>                 |                            |                            |                            |                            |                                                |                                     |
| Australia                          | 10.8 (5.2 to 24.7)         | 9.3 (4.2 to 20.1)          | 8.6 (4.0 to 18.3)          | 8.3 (2.7 to 23.3)          | -1.4 (-5.8 to 3.7)                             | -13.4 (-58.1 to 75.1)               |
| New Zealand                        | 7.2 (4.7 to 11.2)          | 6.3 (4.2 to 9.9)           | 6.0 (3.9 to 9.2)           | 5.5 (2.7 to 10.6)          | -1.1 (-5.3 to 3.3)                             | -11.3 (-54.6 to 63.1)               |
| <b>High-income Asia Pacific</b>    |                            |                            |                            |                            |                                                |                                     |
| Brunei                             | 6.9 (4.7 to 9.4)           | 6.5 (4.5 to 8.9)           | 5.9 (4.1 to 8.1)           | 5.5 (3.2 to 8.9)           | -1.2 (-4.6 to 2.3)                             | -14.1 (-50.1 to 41.9)               |
| Japan                              | 14.2 (12.5 to 15.7)        | 12.7 (11.2 to 14.0)        | 11.7 (10.3 to 13.0)        | 10.4 (8.9 to 11.8)         | -1.3 (-2.0 to -0.7)                            | -18.1 (-25.7 to -9.3)               |
| South Korea                        | 29.8 (22.4 to 39.1)        | 28.2 (20.8 to 37.6)        | 25.0 (18.8 to 32.5)        | 23.0 (14.0 to 35.5)        | -1.5 (-5.0 to 1.8)                             | -16.9 (-52.5 to 31.3)               |
| Singapore                          | 19.3 (12.6 to 27.1)        | 20.7 (12.4 to 28.9)        | 19.1 (12.4 to 26.6)        | 19.7 (9.9 to 33.5)         | -0.5 (-4.7 to 3.2)                             | -4.1 (-50.5 to 60.9)                |
| <b>High-income North America</b>   |                            |                            |                            |                            |                                                |                                     |
| Canada                             | 8.3 (5.1 to 11.9)          | 7.2 (4.2 to 10.3)          | 6.4 (3.9 to 8.9)           | 5.7 (2.7 to 9.5)           | -1.7 (-6.1 to 3.0)                             | -16.9 (-59.9 to 57.7)               |
| Greenland                          | 14.0 (6.0 to 29.9)         | 11.8 (4.8 to 25.1)         | 11.3 (4.9 to 24.8)         | 11.3 (2.9 to 32.9)         | -1.0 (-1.1 to 8.6)                             | 12.8 (-81.0 to 262.2)               |
| United States                      | 9.5 (8.0 to 10.9)          | 8.1 (6.7 to 9.2)           | 7.4 (6.1 to 8.5)           | 6.3 (5.1 to 7.5)           | -1.6 (-2.5 to -0.5)                            | -21.1 (-31.3 to -6.6)               |
| <b>Southern Latin America</b>      |                            |                            |                            |                            |                                                |                                     |
| Argentina                          | 16.8 (6.6 to 38.8)         | 14.6 (6.2 to 38.3)         | 13.3 (5.4 to 31.1)         | 13.6 (3.2 to 44.4)         | -1.3 (-11.3 to 9.4)                            | 10.1 (-81.8 to 311.2)               |
| Chile                              | 26.2 (11.4 to 39.3)        | 22.6 (9.3 to 34.3)         | 21.0 (9.1 to 32.7)         | 20.0 (5.7 to 32.7)         | -1.2 (-8.3 to 5.4)                             | -5.9 (-71.2 to 125.0)               |
| Uruguay                            | 11.4 (6.5 to 20.9)         | 9.7 (5.5 to 20.2)          | 9.3 (5.4 to 17.3)          | 9.0 (3.5 to 21.6)          | -0.9 (-7.5 to 6.4)                             | -8.0 (-67.6 to 162.9)               |
| <b>Western Europe</b>              |                            |                            |                            |                            |                                                |                                     |
| Austria                            | 12.6 (9.5 to 19.7)         | 11.5 (8.4 to 17.7)         | 10.3 (7.5 to 15.7)         | 9.1 (5.1 to 17.9)          | -1.8 (-5.1 to 1.2)                             | -21.6 (-53.6 to 20.6)               |
| Austria                            | 15.4 (9.8 to 21.8)         | 13.5 (8.8 to 19.3)         | 12.5 (8.0 to 18.3)         | 10.9 (5.8 to 18.5)         | -1.6 (-5.7 to 2.6)                             | -17.5 (-57.4 to 47.9)               |
| Belgium                            | 15.7 (10.6 to 21.1)        | 13.6 (9.3 to 18.2)         | 12.9 (8.6 to 17.2)         | 11.2 (6.1 to 16.6)         | -1.4 (-4.6 to 1.8)                             | -16.3 (-49.8 to 30.6)               |
| Cyprus                             | 20.2 (15.3 to 28.2)        | 19.1 (14.1 to 26.6)        | 17.3 (12.7 to 23.9)        | 15.8 (9.8 to 23.2)         | -1.3 (-4.1 to 1.8)                             | -16.3 (-46.3 to 30.0)               |
| Denmark                            | 12.4 (8.8 to 16.4)         | 10.7 (7.8 to 14.0)         | 10.0 (7.3 to 13.1)         | 8.8 (5.3 to 13.7)          | -1.4 (-4.9 to 2.1)                             | -15.8 (-52.4 to 37.4)               |
| Finland                            | 7.1 (4.0 to 9.7)           | 6.1 (3.8 to 8.0)           | 5.9 (3.8 to 7.8)           | 5.2 (2.8 to 7.7)           | -1.1 (-4.7 to 2.3)                             | -11.8 (-50.5 to 41.7)               |
| France                             | 14.7 (9.9 to 20.6)         | 12.8 (8.8 to 17.6)         | 11.8 (8.1 to 16.5)         | 10.3 (6.0 to 15.7)         | -1.5 (-5.2 to 1.8)                             | -17.8 (-54.2 to 31.6)               |
| Germany                            | 14.9 (10.5 to 21.1)        | 12.8 (9.2 to 17.7)         | 12.0 (8.6 to 16.7)         | 10.3 (6.1 to 16.6)         | -1.6 (-5.1 to 2.1)                             | -18.0 (-53.2 to 36.6)               |
| Greece                             | 19.9 (12.5 to 31.9)        | 17.7 (10.8 to 31.4)        | 16.2 (10.1 to 26.3)        | 14.9 (7.1 to 33.4)         | -1.4 (-6.3 to 4.5)                             | -12.9 (-60.9 to 96.0)               |
| Iceland                            | 8.0 (5.1 to 16.6)          | 6.9 (4.5 to 14.6)          | 6.5 (4.2 to 13.8)          | 6.1 (2.9 to 18.2)          | -1.3 (-6.5 to 5.1)                             | -9.7 (-62.6 to 115.8)               |
| Ireland                            | 10.1 (7.5 to 13.0)         | 8.7 (6.4 to 11.0)          | 8.2 (6.1 to 10.5)          | 7.3 (4.6 to 10.8)          | -1.2 (-4.3 to 1.8)                             | -14.9 (-47.2 to 31.1)               |
| Israel                             | 24.5 (14.5 to 39.4)        | 22.8 (13.6 to 45.9)        | 21.4 (12.8 to 43.6)        | 20.8 (9.1 to 59.1)         | -1.0 (-6.7 to 4.8)                             | -7.0 (-63.5 to 107.0)               |
| Italy                              | 19.8 (10.3 to 32.5)        | 17.9 (9.0 to 29.8)         | 16.8 (8.6 to 27.8)         | 15.7 (6.0 to 32.5)         | -1.2 (-7.4 to 5.3)                             | -7.1 (-66.9 to 120.2)               |
| Luxembourg                         | 12.6 (9.4 to 15.9)         | 11.0 (8.4 to 13.5)         | 10.4 (7.7 to 12.7)         | 9.1 (5.9 to 12.6)          | -1.4 (-4.0 to 1.0)                             | -17.0 (-45.0 to 16.5)               |
| Malta                              | 16.5 (12.3 to 21.9)        | 14.7 (11.1 to 19.4)        | 13.9 (10.4 to 18.2)        | 12.7 (7.9 to 19.3)         | -1.1 (-3.2 to 1.4)                             | -13.8 (-38.3 to 23.8)               |
| Netherlands                        | 14.9 (11.6 to 18.5)        | 12.9 (10.3 to 15.9)        | 12.0 (9.6 to 14.8)         | 10.3 (7.2 to 14.8)         | -1.6 (-4.3 to 1.0)                             | -19.2 (-47.4 to 17.0)               |
| Norway                             | 8.7 (7.5 to 9.7)           | 7.2 (6.2 to 8.0)           | 7.0 (6.0 to 7.7)           | 6.0 (5.1 to 6.9)           | -1.2 (-2.0 to -0.4)                            | -16.3 (-25.4 to -5.5)               |
| Portugal                           | 10.1 (6.0 to 16.0)         | 8.8 (5.3 to 13.7)          | 8.2 (4.9 to 12.6)          | 7.4 (3.5 to 14.1)          | -1.4 (-6.5 to 3.5)                             | -13.6 (-62.0 to 69.3)               |
| Spain                              | 11.8 (7.6 to 16.9)         | 10.4 (6.7 to 15.2)         | 9.7 (6.1 to 14.2)          | 8.8 (4.2 to 15.3)          | -1.4 (-6.1 to 3.1)                             | -13.5 (-60.1 to 59.3)               |
| Sweden                             | 7.6 (5.1 to 11.9)          | 6.3 (4.3 to 10.1)          | 6.2 (4.3 to 9.7)           | 5.5 (3.3 to 10.1)          | -1.0 (-4.1 to 2.5)                             | -11.1 (-46.0 to 45.8)               |
| Switzerland                        | 12.7 (8.3 to 17.8)         | 11.2 (7.6 to 15.4)         | 10.3 (7.4 to 14.0)         | 8.9 (5.5 to 13.9)          | -1.6 (-4.7 to 1.9)                             | -18.8 (-50.6 to 33.3)               |
| United Kingdom                     | 12.6 (11.7 to 13.4)        | 10.8 (10.0 to 11.4)        | 10.5 (9.7 to 11.2)         | 9.2 (8.4 to 9.9)           | -1.1 (-1.4 to -0.8)                            | -14.8 (-18.6 to -10.8)              |
| <b>Latin America and Caribbean</b> |                            |                            |                            |                            |                                                |                                     |
| <b>Andean Latin America</b>        |                            |                            |                            |                            |                                                |                                     |
| Bolivia                            | 26.2 (10.1 to 53.6)        | 22.5 (8.8 to 47.4)         | 21.6 (8.0 to 44.5)         | 22.1 (4.8 to 63.4)         | -0.8 (-10.2 to 9.1)                            | 14.5 (-78.2 to 293.6)               |
| Ecuador                            | 18.7 (9.9 to 30.9)         | 15.7 (8.4 to 25.9)         | 14.9 (8.3 to 24.7)         | 13.7 (5.5 to 28.5)         | -1.2 (-6.7 to 5.1)                             | -7.8 (-63.2 to 116.0)               |
| Peru                               | 30.3 (11.3 to 57.1)        | 26.0 (9.6 to 49.3)         | 24.8 (8.9 to 51.3)         | 24.4 (5.2 to 60.7)         | -1.1 (-9.9 to 7.2)                             | 4.1 (-77.5 to 195.9)                |
| <b>Caribbean</b>                   |                            |                            |                            |                            |                                                |                                     |
| Antigua and Barbuda                | 22.0 (11.9 to 38.6)        | 19.7 (10.8 to 34.0)        | 18.6 (9.9 to 32.0)         | 18.0 (6.4 to 41.2)         | -1.1 (-8.4 to 6.3)                             | -2.1 (-71.5 to 155.6)               |
| The Bahamas                        | 21.3 (9.2 to 42.9)         | 18.9 (8.3 to 36.9)         | 17.4 (7.4 to 33.8)         | 17.1 (4.6 to 44.6)         | -1.4 (-10.2 to 7.3)                            | 2.2 (-78.2 to 197.5)                |
| Barbados                           | 28.5 (15.3 to 48.7)        | 26.7 (13.6 to 41.7)        | 25.1 (12.4 to 38.6)        | 22.0 (8.4 to 48.5)         | -1.2 (-8.2 to 5.9)                             | -4.1 (-70.6 to 142.0)               |
| Belize                             | 27.8 (8.3 to 68.5)         | 25.2 (9.0 to 54.9)         | 23.0 (9.1 to 49.6)         | 22.1 (5.3 to 73.5)         | -0.9 (-12.0 to 10.7)                           | 26.5 (-83.5 to 397.7)               |
| Bermuda                            | 14.8 (8.9 to 23.5)         | 12.4 (7.5 to 19.2)         | 11.7 (7.0 to 18.0)         | 11.2 (6.5 to 17.5)         | -0.7 (-1.3 to -0.1)                            | -10.1 (-17.5 to -2.0)               |
| Cuba                               | 24.1 (8.5 to 47.4)         | 20.9 (7.5 to 40.1)         | 19.7 (7.1 to 37.9)         | 19.7 (7.1 to 37.9)         | -1.0 (-11.2 to 8.8)                            | 12.6 (-81.4 to 276.2)               |
| Dominica                           | 23.0 (11.7 to 38.8)        | 20.7 (10.8 to 35.2)        | 19.5 (10.4 to 33.0)        | 18.7 (7.0 to 42.6)         | -1.1 (-7.8 to 5.8)                             | -5.0 (-68.9 to 138.2)               |
| Dominican Republic                 | 16.4 (6.6 to 34.5)         | 14.9 (5.9 to 30.8)         | 13.7 (5.6 to 28.3)         | 14.2 (3.2 to 38.3)         | -1.1 (-10.6 to 8.2)                            | 11.6 (-79.6 to 243.5)               |
| Grenada                            | 27.5 (13.4 to 50.6)        | 24.2 (12.2 to 43.4)        | 22.7 (11.4 to 42.5)        | 22.3 (7.1 to 53.9)         | -1.1 (-8.5 to 6.3)                             | -1.8 (-72.1 to 156.8)               |
| Guyana                             | 27.4 (9.7 to 62.3)         | 23.9 (8.6 to 54.4)         | 22.4 (8.4 to 50.2)         | 24.1 (5.3 to 75.5)         | -0.8 (-10.6 to 9.7)                            | 25.1 (-79.5 to 330.5)               |
| Haiti                              | 17.8 (7.1 to 35.7)         | 15.5 (6.5 to 31.3)         | 15.0 (6.3 to 33.0)         | 15.6 (3.7 to 49.1)         | -0.8 (-10.6 to 9.6)                            | 19.9 (-79.7 to 321.5)               |

|                                               | Estimate in 2000 (95% UIs) | Estimate in 2015 (95% UIs) | Estimate in 2017 (95% UIs) | Estimate in 2030 (95% UIs) | Annualised rate of change, 2015-2030 (95% UIs) | Percent change, 2015-2030 (95% UIs) |
|-----------------------------------------------|----------------------------|----------------------------|----------------------------|----------------------------|------------------------------------------------|-------------------------------------|
| Jamaica                                       | 15.9 (10.5 to 26.4)        | 14.2 (9.4 to 22.7)         | 13.4 (8.7 to 21.9)         | 12.4 (6.5 to 23.4)         | -1.1 (-5.1 to 3.1)                             | -11.0 (-53.3 to 60.2)               |
| Puerto Rico                                   | 10.4 (5.7 to 16.9)         | 8.9 (4.9 to 14.3)          | 8.3 (4.3 to 14.0)          | 8.1 (4.3 to 14.0)          | -0.7 (-1.3 to 0.1)                             | -9.3 (-18.2 to 0.8)                 |
| Saint Lucia                                   | 27.1 (13.5 to 47.2)        | 24.3 (13.1 to 42.8)        | 22.4 (12.5 to 38.8)        | 21.8 (7.9 to 51.3)         | -1.2 (-8.3 to 5.9)                             | -2.0 (-7.4 to 142.5)                |
| Saint Vincent and the Grenadines              | 27.0 (12.9 to 54.0)        | 23.5 (12.1 to 44.3)        | 22.2 (11.4 to 41.7)        | 21.5 (7.0 to 50.6)         | -1.1 (-8.8 to 7.0)                             | 0.7 (-7.3 to 184.2)                 |
| Suriname                                      | 29.0 (10.8 to 61.6)        | 26.0 (9.5 to 52.6)         | 24.8 (9.2 to 48.3)         | 25.1 (5.5 to 66.0)         | -1.0 (-10.2 to 8.9)                            | 11.8 (-78.5 to 277.4)               |
| Trinidad and Tobago                           | 28.8 (11.8 to 56.8)        | 24.9 (10.8 to 50.7)        | 24.1 (10.7 to 48.0)        | 24.3 (10.6 to 66.7)        | -0.9 (-10.6 to 9.7)                            | 15.5 (-79.5 to 326.1)               |
| Virgin Islands, U.S.                          | 12.8 (7.0 to 23.6)         | 11.0 (6.1 to 20.0)         | 10.3 (5.7 to 18.6)         | 9.9 (5.3 to 18.4)          | -0.7 (-1.3 to -0.1)                            | -10.4 (-18.2 to -1.6)               |
| <b>Central Latin America</b>                  |                            |                            |                            |                            |                                                |                                     |
| Colombia                                      | 20.1 (8.2 to 40.2)         | 17.3 (7.4 to 34.4)         | 16.5 (6.6 to 35.5)         | 16.5 (4.2 to 46.0)         | -1.2 (-9.5 to 9.0)                             | 8.2 (-75.9 to 285.7)                |
| Costa Rica                                    | 19.4 (11.6 to 26.6)        | 16.9 (10.2 to 23.1)        | 15.7 (9.5 to 21.3)         | 14.4 (-7.0 to 21.3)        | -1.2 (-4.7 to 2.1)                             | -12.8 (-50.9 to 38.0)               |
| El Salvador                                   | 31.9 (18.0 to 52.7)        | 26.5 (15.2 to 44.3)        | 24.5 (13.3 to 40.7)        | 22.3 (8.4 to 46.8)         | -1.5 (-7.9 to 4.6)                             | -30.3 (-69.3 to 99.8)               |
| Guatemala                                     | 31.1 (17.6 to 46.5)        | 25.1 (13.7 to 38.5)        | 24.1 (13.9 to 36.1)        | 22.1 (9.2 to 41.0)         | -1.1 (-6.6 to 4.9)                             | -6.5 (-42.8 to 108.3)               |
| Honduras                                      | 27.6 (13.8 to 48.6)        | 22.4 (11.8 to 36.4)        | 20.6 (11.3 to 34.8)        | 18.6 (7.3 to 40.5)         | -1.6 (-7.8 to 5.2)                             | -11.0 (-68.7 to 117.2)              |
| Mexico                                        | 26.8 (18.3 to 34.9)        | 22.1 (15.2 to 28.8)        | 20.9 (14.5 to 26.8)        | 19.1 (12.1 to 26.3)        | -1.0 (-2.8 to 0.8)                             | -13.3 (-34.5 to 12.6)               |
| Nicaragua                                     | 23.1 (11.1 to 38.7)        | 18.6 (8.4 to 32.3)         | 17.6 (8.4 to 30.4)         | 16.2 (5.4 to 34.3)         | -1.3 (-8.1 to 5.5)                             | -6.1 (-70.2 to 128.8)               |
| Panama                                        | 14.4 (7.9 to 23.7)         | 12.5 (6.8 to 20.6)         | 11.4 (6.2 to 18.2)         | 10.8 (4.0 to 21.9)         | -1.3 (-6.6 to 4.1)                             | -10.1 (-63.1 to 84.3)               |
| Venezuela                                     | 21.6 (8.1 to 44.1)         | 18.3 (7.3 to 38.4)         | 17.0 (6.6 to 35.0)         | 16.5 (3.7 to 47.2)         | -1.4 (-10.8 to 8.2)                            | 5.8 (-80.1 to 239.7)                |
| <b>Tropical Latin America</b>                 |                            |                            |                            |                            |                                                |                                     |
| Brazil                                        | 15.8 (12.6 to 19.2)        | 13.6 (11.0 to 16.5)        | 12.7 (10.2 to 15.3)        | 11.4 (8.2 to 15.0)         | -1.2 (-3.2 to 1.0)                             | -15.6 (-38.1 to 15.4)               |
| Paraguay                                      | 14.2 (7.0 to 24.7)         | 13.0 (6.1 to 23.5)         | 11.9 (5.6 to 21.1)         | 11.5 (3.8 to 25.9)         | -1.3 (-8.6 to 6.4)                             | -2.1 (-72.3 to 159.9)               |
| <b>North Africa and Middle East</b>           |                            |                            |                            |                            |                                                |                                     |
| <b>North Africa and Middle East</b>           |                            |                            |                            |                            |                                                |                                     |
| Algeria                                       | 64.9 (28.4 to 115.7)       | 61.2 (26.9 to 105.0)       | 56.9 (25.9 to 103.2)       | 56.7 (16.1 to 132.9)       | -1.1 (-8.6 to 7.6)                             | 3.2 (-72.5 to 212.4)                |
| Algeria                                       | 37.5 (15.0 to 80.4)        | 36.1 (12.9 to 83.0)        | 38.9 (12.8 to 89.4)        | 43.5 (8.9 to 137.7)        | 0.3 (-10.9 to 11.7)                            | 48.2 (-80.5 to 474.2)               |
| Bahrain                                       | 68.0 (48.5 to 92.8)        | 72.6 (50.5 to 101.5)       | 70.8 (49.1 to 99.4)        | 74.5 (40.5 to 127.9)       | -0.0 (-4.4 to 4.4)                             | 5.1 (-48.2 to 93.0)                 |
| Egypt                                         | 73.3 (32.3 to 132.0)       | 88.2 (30.9 to 166.8)       | 87.0 (33.7 to 164.2)       | 101.4 (22.9 to 261.5)      | 0.3 (-9.8 to 9.0)                              | 31.4 (-77.0 to 287.7)               |
| Iran                                          | 38.4 (33.8 to 43.4)        | 39.6 (34.7 to 44.9)        | 39.0 (34.4 to 44.8)        | 39.7 (32.3 to 49.2)        | -0.0 (-1.6 to 1.6)                             | 0.6 (-20.9 to 27.8)                 |
| Iraq                                          | 62.5 (28.4 to 116.7)       | 66.3 (30.3 to 129.1)       | 61.6 (29.0 to 109.7)       | 66.1 (19.8 to 160.4)       | -0.5 (-8.8 to 7.4)                             | 12.6 (-73.3 to 204.3)               |
| Jordan                                        | 33.5 (19.7 to 52.2)        | 34.3 (20.3 to 59.6)        | 33.0 (19.4 to 53.9)        | 33.4 (15.2 to 67.4)        | -0.4 (-5.5 to 4.0)                             | 0.0 (-56.2 to 81.3)                 |
| Kuwait                                        | 61.5 (38.1 to 94.7)        | 65.4 (41.0 to 101.0)       | 60.8 (39.2 to 90.8)        | 62.5 (32.1 to 112.5)       | -0.5 (-4.8 to 4.0)                             | -1.4 (-51.6 to 82.3)                |
| Lebanon                                       | 30.6 (21.7 to 42.2)        | 31.2 (20.8 to 44.1)        | 30.6 (20.6 to 43.4)        | 31.7 (16.5 to 54.1)        | -0.1 (-4.8 to 4.8)                             | 5.1 (-51.6 to 105.7)                |
| Libya                                         | 46.3 (16.8 to 105.6)       | 51.5 (16.1 to 134.0)       | 54.2 (16.2 to 135.5)       | 65.8 (10.2 to 233.9)       | 0.5 (-11.6 to 13.2)                            | 67.6 (-82.4 to 627.1)               |
| Morocco                                       | 31.0 (16.5 to 54.3)        | 31.4 (16.3 to 55.8)        | 32.6 (17.1 to 55.2)        | 35.6 (12.3 to 79.2)        | 0.3 (-6.8 to 7.9)                              | 24.8 (-63.7 to 227.8)               |
| Palestine                                     | 33.9 (20.4 to 57.3)        | 33.9 (18.3 to 63.1)        | 33.2 (18.0 to 60.3)        | 34.5 (13.0 to 74.3)        | -0.3 (-5.9 to 5.6)                             | 6.1 (-88.7 to 133.0)                |
| Oman                                          | 39.9 (19.9 to 77.6)        | 42.6 (20.8 to 85.5)        | 41.1 (20.0 to 76.6)        | 44.5 (14.1 to 107.9)       | -0.3 (-8.5 to 7.5)                             | 16.9 (-72.0 to 206.5)               |
| Qatar                                         | 83.5 (53.3 to 125.7)       | 94.4 (57.9 to 144.1)       | 91.2 (55.5 to 140.7)       | 96.0 (42.1 to 192.3)       | -0.2 (-5.6 to 5.0)                             | 5.6 (-56.8 to 110.2)                |
| Saudi Arabia                                  | 79.1 (29.2 to 173.5)       | 97.4 (29.2 to 239.8)       | 88.0 (29.6 to 197.9)       | 109.2 (17.5 to 346.6)      | -0.1 (-10.8 to 10.8)                           | 39.2 (-80.3 to 407.1)               |
| Sudan                                         | 49.4 (16.2 to 121.2)       | 58.9 (14.8 to 168.4)       | 55.4 (15.4 to 142.5)       | 66.5 (9.0 to 235.8)        | -0.4 (-14.9 to 13.0)                           | 59.9 (-89.2 to 603.1)               |
| Syria                                         | 41.6 (23.4 to 78.5)        | 44.3 (23.1 to 89.3)        | 43.8 (22.7 to 87.8)        | 46.9 (14.7 to 120.2)       | -0.3 (-7.9 to 7.5)                             | 12.7 (-69.4 to 209.7)               |
| Tunisia                                       | 35.6 (20.4 to 58.9)        | 36.3 (19.8 to 65.2)        | 37.7 (19.5 to 69.0)        | 40.9 (14.8 to 97.3)        | 0.3 (-7.1 to 7.2)                              | 24.0 (-65.6 to 192.9)               |
| Turkey                                        | 42.7 (26.7 to 62.8)        | 45.3 (27.0 to 71.1)        | 44.3 (26.5 to 67.5)        | 47.2 (19.3 to 88.3)        | -0.0 (-4.8 to 5.6)                             | 10.3 (-61.9 to 131.3)               |
| United Arab Emirates                          | 39.7 (23.3 to 64.4)        | 42.3 (23.3 to 72.0)        | 40.9 (23.0 to 71.8)        | 43.7 (16.5 to 92.7)        | -0.2 (-7.0 to 6.4)                             | 11.3 (-65.2 to 160.9)               |
| Yemen                                         | 50.9 (17.8 to 123.2)       | 54.3 (16.8 to 127.6)       | 50.5 (15.8 to 126.0)       | 58.4 (9.8 to 197.1)        | -0.7 (-12.5 to 12.1)                           | 42.9 (-84.6 to 512.2)               |
| <b>South Asia</b>                             |                            |                            |                            |                            |                                                |                                     |
| <b>South Asia</b>                             |                            |                            |                            |                            |                                                |                                     |
| Bangladesh                                    | 63.0 (40.2 to 91.6)        | 67.0 (42.8 to 95.9)        | 60.9 (38.0 to 86.3)        | 61.4 (28.9 to 105.6)       | -0.8 (-5.6 to 4.1)                             | -4.8 (-56.7 to 84.2)                |
| Bhutan                                        | 39.8 (22.7 to 65.2)        | 39.8 (23.2 to 67.5)        | 37.9 (21.6 to 66.0)        | 38.8 (15.2 to 93.9)        | -0.7 (-5.9 to 4.3)                             | -2.7 (-58.6 to 90.2)                |
| India                                         | 84.2 (65.2 to 102.5)       | 89.3 (68.9 to 109.9)       | 90.9 (63.5 to 113.6)       | 96.1 (63.8 to 131.9)       | 0.4 (-1.7 to 2.6)                              | 8.0 (-22.4 to 48.5)                 |
| Nepal                                         | 88.9 (41.6 to 171.0)       | 96.2 (44.2 to 170.8)       | 99.7 (44.6 to 179.5)       | 113.9 (33.1 to 267.3)      | 0.6 (-7.2 to 8.4)                              | 30.1 (-66.0 to 255.1)               |
| Pakistan                                      | 61.1 (30.4 to 107.3)       | 60.1 (31.2 to 115.0)       | 58.3 (31.1 to 106.0)       | 61.0 (19.6 to 145.1)       | -0.3 (-7.7 to 7.5)                             | 11.6 (-68.4 to 207.6)               |
| <b>Southeast Asia, East Asia, and Oceania</b> |                            |                            |                            |                            |                                                |                                     |
| <b>East Asia</b>                              |                            |                            |                            |                            |                                                |                                     |
| China                                         | 60.7 (48.2 to 73.1)        | 59.1 (46.4 to 70.8)        | 52.7 (41.0 to 62.8)        | 48.9 (37.1 to 60.2)        | -1.3 (-2.3 to -0.2)                            | -17.1 (-29.5 to -2.9)               |
| North Korea                                   | 38.2 (22.7 to 57.3)        | 37.4 (21.8 to 57.9)        | 32.0 (19.2 to 48.4)        | 30.2 (12.8 to 59.3)        | -1.8 (-7.8 to 4.6)                             | -14.4 (-69.1 to 99.3)               |
| Taiwan (Province of China)                    | 28.8 (17.7 to 41.1)        | 25.2 (14.6 to 34.8)        | 23.2 (10.3 to 31.8)        | 21.6 (10.3 to 35.9)        | -1.2 (-5.1 to 2.2)                             | -13.7 (-53.7 to 39.2)               |
| <b>Oceania</b>                                |                            |                            |                            |                            |                                                |                                     |
| American Samoa                                | 15.2 (8.1 to 25.4)         | 13.0 (7.0 to 21.4)         | 12.5 (6.7 to 20.6)         | 12.1 (6.3 to 20.9)         | -0.5 (-0.9 to 0.0)                             | -7.4 (-13.1 to 0.4)                 |
| Federated States of Micronesia                | 14.1 (4.8 to 31.1)         | 11.7 (3.7 to 24.7)         | 11.3 (4.1 to 22.9)         | 11.5 (2.3 to 32.4)         | -0.9 (-12.3 to 9.7)                            | 21.3 (-84.2 to 326.0)               |
| Fiji                                          | 13.1 (4.8 to 27.2)         | 11.6 (4.5 to 23.0)         | 10.8 (4.0 to 22.4)         | 11.1 (2.5 to 24.4)         | -1.3 (-11.5 to 9.0)                            | 12.5 (-82.1 to 283.3)               |
| Guam                                          | 14.3 (8.7 to 23.1)         | 12.5 (7.6 to 20.2)         | 11.6 (7.1 to 18.8)         | 11.2 (6.5 to 18.6)         | -0.8 (-1.4 to -0.1)                            | -10.7 (-18.9 to -1.4)               |
| Kiribati                                      | 13.5 (4.9 to 27.9)         | 11.5 (4.9 to 23.9)         | 10.6 (4.2 to 21.8)         | 10.5 (2.5 to 26.8)         | -1.3 (-11.3 to 8.1)                            | 7.9 (-81.7 to 234.6)                |
| Marshall Islands                              | 13.0 (5.1 to 25.3)         | 10.8 (4.7 to 20.8)         | 10.2 (4.4 to 20.3)         | 10.1 (2.6 to 26.1)         | -1.2 (-10.5 to 8.0)                            | 7.1 (-79.2 to 231.9)                |
| Northern Mariana Islands                      | 12.2 (7.2 to 19.3)         | 10.4 (6.1 to 16.7)         | 9.9 (5.9 to 15.7)          | 9.1 (5.2 to 15.0)          | -1.0 (-1.4 to -0.3)                            | -13.3 (-19.3 to -3.9)               |
| Papua New Guinea                              | 14.8 (3.9 to 37.5)         | 13.3 (3.6 to 33.3)         | 12.3 (3.4 to 35.4)         | 13.3 (2.0 to 49.2)         | -1.3 (-14.5 to 11.9)                           | 38.2 (-88.7 to 499.1)               |
| Samoa                                         | 14.3 (4.6 to 31.2)         | 12.3 (3.9 to 27.1)         | 11.6 (3.5 to 26.0)         | 12.2 (1.9 to 39.4)         | -1.3 (-12.7 to 10.4)                           | 24.0 (-85.2 to 375.6)               |
| Solomon Islands                               | 13.9 (4.2 to 34.6)         | 12.7 (4.0 to 33.8)         | 11.9 (3.8 to 29.5)         | 13.0 (2.1 to 44.9)         | -0.9 (-12.9 to 11.2)                           | 35.8 (-85.7 to 434.4)               |
| Tonga                                         | 12.8 (5.1 to 25.0)         | 11.3 (4.5 to 21.6)         | 10.8 (4.2 to 21.7)         | 10.8 (2.6 to 28.9)         | -1.1 (-10.3 to 8.2)                            | 10.5 (-78.7 to 244.5)               |
| Vanuatu                                       | 14.1 (4.5 to 33.1)         | 12.2 (3.8 to 28.6)         | 11.7 (3.8 to 25.8)         | 12.8 (2.1 to 43.6)         | -0.6 (-12.8 to 12.6)                           | 44.1 (-85.2 to 561.3)               |
| <b>Southeast Asia</b>                         |                            |                            |                            |                            |                                                |                                     |
| Cambodia                                      | 30.0 (15.9 to 52.8)        | 26.8 (14.1 to 49.5)        | 25.6 (12.7 to 48.5)        | 25.2 (8.0 to 61.3)         | -1.0 (-8.7 to 7.2)                             | 3.4 (-72.8 to 196.5)                |
| Indonesia                                     | 17.9 (13.9 to 24.0)        | 16.6 (13.0 to 22.1)        | 16.6 (13.0 to 21.7)        | 15.7 (11.0 to 21.5)        | -0.4 (-2.2 to 1.5)                             | -5.2 (-28.5 to 24.4)                |
| Laos                                          | 27.6 (12.1 to 48.2)        | 26.1 (11.4 to 47.9)        | 25.1 (9.9 to 45.2)         | 26.5 (6.9 to 63.9)         | -0.6 (-10.0 to 7.8)                            | 18.8 (-77.7 to 224.3)               |
| Malaysia                                      | 18.1 (7.3 to 28.9)         | 17.4 (7.6 to 27.4)         | 16.0 (6.7 to 25.9)         | 15.8 (4.5 to 30.5)         | -1.0 (-7.6 to 5.3)                             | -3.6 (-68.0 to 122.8)               |
| Maldives                                      | 11.1 (8.0 to 14.9)         | 9.4 (6.7 to 12.6)          | 7.8 (5.6 to 10.6)          | 6.2 (4.5 to 8.4)           | -2.8 (-2.9 to -2.6)                            | -33.8 (-35.3 to -32.3)              |
| Mauritius                                     | 15.4 (8.1 to 26.3)         | 14.4 (7.2 to 27.0)         | 14.5 (7.2 to 26.8)         | 14.9 (4.7 to 36.0)         | -0.3 (-7.8 to 6.9)                             | 10.1 (-68.8 to 180.9)               |
| Myanmar                                       | 39.4 (22.8 to 61.5)        | 38.5 (21.6 to 60.9)        | 35.6 (21.2 to 58.5)        | 34.8 (15.1 to 74.3)        | -1.0 (-7.2 to 5.6)                             | -3.3 (-66.2 to 131.4)               |
| Philippines                                   | 22.2 (9.3 to 36.6)         | 19.6 (8.6 to 31.5)         | 18.1 (7.8 to 28.8)         | 17.1 (4.8 to 28.8)         | -1.3 (-9.2 to 6.2)                             | -4.4 (-74.9 to 151.6)               |
| Sri Lanka                                     | 30.9 (17.3 to 47.0)        | 25.3 (15.2 to 38.0)        | 11.1 (2.4 to 27.3)         | 8.5 (1.1 to 26.6)          | -9.9 (-20.6 to 1.5)                            | -63.8 (-95.4 to 25.2)               |
| Seychelles                                    | 21.6 (12.4 to 35.5)        | 20.1 (10.4 to 37.1)        | 20.2 (10.6 to 37.0)        | 20.5 (7.2 to 51.3)         | -0.3 (-3.2 to 2.7)                             | -1.5 (-38.4 to 51.0)                |
| Thailand                                      | 31.0 (16.4 to 49.9)        | 27.3 (15.8 to 43.5)        | 26.3 (13.5 to 40.8)        | 25.2 (8.6 to 50.3)         | -0.9 (-8.4 to 5.6)                             | -1.6 (-71.5 to 131.4)               |

|                                                                                                             | Estimate in 2000 (95% UIs) | Estimate in 2015 (95% UIs) | Estimate in 2017 (95% UIs) | Estimate in 2020 (95% UIs) | Annualised rate of change, 2015-2020 (95% UIs) | Percent change, 2015-2020 (95% UIs) |
|-------------------------------------------------------------------------------------------------------------|----------------------------|----------------------------|----------------------------|----------------------------|------------------------------------------------|-------------------------------------|
| Timor-Leste                                                                                                 | 23.5 (8.7 to 49.9)         | 20.6 (7.5 to 42.5)         | 19.3 (7.4 to 40.3)         | 19.8 (4.2 to 58.6)         | -1.1 (-12.4 to 9.9)                            | 19.3 (-84.4 to 342.5)               |
| Vietnam                                                                                                     | 36.2 (13.7 to 62.6)        | 32.5 (13.0 to 57.3)        | 29.6 (11.2 to 50.5)        | 28.9 (6.9 to 69.0)         | -1.3 (-11.1 to 7.9)                            | 2.2 (-81.0 to 225.6)                |
| <b>Sub-Saharan Africa</b>                                                                                   |                            |                            |                            |                            |                                                |                                     |
| <b>Central Sub-Saharan Africa</b>                                                                           |                            |                            |                            |                            |                                                |                                     |
| Angola                                                                                                      | 36.2 (11.5 to 84.8)        | 32.7 (12.7 to 73.0)        | 32.4 (11.9 to 70.8)        | 35.1 (6.6 to 101.5)        | -0.6 (-12.3 to 9.7)                            | 31.1 (-84.2 to 330.1)               |
| Central African Republic                                                                                    | 51.6 (15.6 to 129.9)       | 58.3 (14.3 to 154.5)       | 56.8 (14.3 to 154.5)       | 66.6 (8.3 to 255.6)        | -0.5 (-14.2 to 13.6)                           | 60.6 (-88.0 to 663.6)               |
| Congo                                                                                                       | 43.6 (13.1 to 118.5)       | 44.1 (13.5 to 109.0)       | 46.6 (12.9 to 121.8)       | 53.3 (7.8 to 194.1)        | -0.1 (-13.3 to 12.5)                           | 58.2 (-86.3 to 554.0)               |
| Democratic Republic of the Congo                                                                            | 44.8 (12.3 to 109.9)       | 44.9 (12.4 to 113.4)       | 44.9 (11.7 to 105.9)       | 51.9 (11.7 to 185.5)       | -0.2 (-14.3 to 13.4)                           | 59.9 (-88.3 to 641.6)               |
| Equatorial Guinea                                                                                           | 51.7 (19.1 to 118.0)       | 52.6 (19.3 to 117.3)       | 53.2 (19.3 to 120.8)       | 59.5 (11.8 to 174.8)       | -0.1 (-11.0 to 10.6)                           | 40.0 (-80.7 to 387.8)               |
| Gabon                                                                                                       | 42.6 (14.5 to 106.7)       | 44.1 (15.2 to 105.3)       | 44.4 (15.2 to 102.7)       | 49.7 (10.7 to 161.8)       | -0.1 (-11.1 to 10.8)                           | 41.2 (-80.9 to 405.2)               |
| <b>Eastern Sub-Saharan Africa</b>                                                                           |                            |                            |                            |                            |                                                |                                     |
| Burundi                                                                                                     | 41.0 (13.3 to 92.7)        | 38.4 (14.8 to 86.8)        | 38.9 (14.5 to 85.2)        | 42.6 (8.4 to 122.2)        | -0.3 (-11.2 to 10.4)                           | 36.2 (-81.4 to 372.7)               |
| Comoros                                                                                                     | 21.5 (10.9 to 38.5)        | 20.7 (10.3 to 36.0)        | 20.6 (9.7 to 37.8)         | 21.8 (6.1 to 54.2)         | -0.3 (-8.8 to 7.7)                             | 16.3 (-73.3 to 218.1)               |
| Djibouti                                                                                                    | 41.0 (13.7 to 96.1)        | 46.0 (14.7 to 107.0)       | 45.5 (14.3 to 114.0)       | 52.6 (9.0 to 180.9)        | -0.2 (-12.6 to 12.3)                           | 52.4 (-84.8 to 532.3)               |
| Eritrea                                                                                                     | 46.4 (15.4 to 105.5)       | 49.8 (15.7 to 116.7)       | 48.0 (15.7 to 114.7)       | 54.7 (9.4 to 189.0)        | -0.5 (-12.6 to 11.1)                           | 38.6 (-84.9 to 430.0)               |
| Ethiopia                                                                                                    | 35.5 (23.7 to 52.8)        | 38.9 (25.3 to 58.0)        | 39.0 (25.5 to 58.2)        | 42.4 (20.5 to 80.2)        | 0.3 (-4.9 to 5.6)                              | 14.2 (-52.2 to 130.8)               |
| Kenya                                                                                                       | 28.4 (25.4 to 31.9)        | 28.5 (25.5 to 32.1)        | 28.6 (25.5 to 32.4)        | 28.8 (23.8 to 34.6)        | 0.0 (-1.4 to 1.5)                              | 1.1 (-19.4 to 25.2)                 |
| Madagascar                                                                                                  | 21.9 (11.6 to 38.3)        | 22.9 (11.6 to 41.4)        | 22.5 (11.2 to 38.2)        | 24.0 (8.1 to 54.3)         | -0.2 (-7.6 to 7.1)                             | 14.8 (-68.1 to 191.2)               |
| Malawi                                                                                                      | 26.1 (9.8 to 60.5)         | 24.5 (9.7 to 52.9)         | 23.6 (9.7 to 47.5)         | 24.8 (6.0 to 68.0)         | -0.7 (-10.3 to 9.0)                            | 19.4 (-78.8 to 287.5)               |
| Mozambique                                                                                                  | 22.7 (9.4 to 48.8)         | 21.9 (9.5 to 47.5)         | 21.3 (9.5 to 43.5)         | 22.6 (5.7 to 58.7)         | -0.5 (-9.8 to 8.7)                             | 18.9 (-77.0 to 271.2)               |
| Rwanda                                                                                                      | 43.5 (15.3 to 92.9)        | 42.6 (14.5 to 98.5)        | 43.2 (14.9 to 99.7)        | 46.6 (8.6 to 148.7)        | -0.3 (-12.0 to 10.7)                           | 37.3 (-85.6 to 395.2)               |
| Somalia                                                                                                     | 31.4 (13.1 to 65.0)        | 32.0 (12.8 to 66.9)        | 32.0 (12.8 to 72.1)        | 36.1 (7.6 to 108.2)        | -0.2 (-10.7 to 10.2)                           | 32.2 (-80.0 to 358.9)               |
| South Sudan                                                                                                 | 44.1 (14.2 to 104.9)       | 47.8 (15.1 to 108.9)       | 45.6 (14.7 to 107.0)       | 51.5 (8.4 to 182.5)        | -0.5 (-12.8 to 11.7)                           | 41.1 (-83.3 to 482.6)               |
| Tanzania                                                                                                    | 29.0 (12.1 to 62.7)        | 28.2 (12.7 to 63.8)        | 29.1 (12.3 to 67.1)        | 31.5 (7.5 to 101.1)        | -0.2 (-10.4 to 10.1)                           | 31.9 (-79.0 to 353.4)               |
| Uganda                                                                                                      | 46.0 (18.8 to 85.8)        | 49.0 (20.0 to 94.2)        | 50.5 (21.1 to 97.2)        | 56.6 (13.9 to 146.3)       | 0.3 (-9.0 to 9.6)                              | 35.5 (-74.0 to 319.7)               |
| Zambia                                                                                                      | 30.9 (10.4 to 76.5)        | 28.4 (10.1 to 61.6)        | 27.4 (10.4 to 62.2)        | 28.9 (5.6 to 88.7)         | -0.9 (-12.1 to 10.5)                           | 27.0 (-83.6 to 380.9)               |
| <b>Southern Sub-Saharan Africa</b>                                                                          |                            |                            |                            |                            |                                                |                                     |
| Botswana                                                                                                    | 25.3 (11.2 to 51.7)        | 24.3 (11.3 to 47.1)        | 23.1 (10.3 to 43.9)        | 24.4 (6.4 to 63.0)         | -0.7 (-9.7 to 7.9)                             | 14.3 (-76.6 to 227.6)               |
| Lesotho                                                                                                     | 31.5 (18.4 to 51.9)        | 30.9 (17.5 to 49.6)        | 28.0 (16.0 to 45.8)        | 27.9 (11.3 to 56.9)        | -1.1 (-7.6 to 5.8)                             | -2.6 (-67.9 to 138.2)               |
| Namibia                                                                                                     | 27.4 (11.0 to 58.2)        | 26.9 (10.9 to 57.8)        | 25.4 (9.6 to 53.2)         | 27.0 (5.8 to 82.6)         | -0.9 (-11.1 to 9.5)                            | 19.2 (-81.0 to 318.6)               |
| South Africa                                                                                                | 26.7 (21.9 to 32.5)        | 26.1 (21.3 to 32.7)        | 25.1 (20.5 to 31.1)        | 24.6 (17.4 to 34.8)        | -0.5 (-2.8 to 2.0)                             | -5.0 (-34.4 to 34.6)                |
| Swaziland                                                                                                   | 18.7 (10.3 to 30.5)        | 17.9 (10.9 to 27.8)        | 17.2 (10.2 to 26.2)        | 17.1 (7.0 to 33.0)         | -0.6 (-6.7 to 5.5)                             | 11.7 (-63.2 to 129.9)               |
| Zimbabwe                                                                                                    | 23.1 (9.1 to 50.3)         | 21.7 (9.0 to 45.1)         | 22.2 (9.0 to 47.3)         | 24.5 (5.5 to 72.2)         | -0.1 (-10.3 to 9.9)                            | 34.9 (-78.6 to 341.0)               |
| <b>Western Sub-Saharan Africa</b>                                                                           |                            |                            |                            |                            |                                                |                                     |
| Benin                                                                                                       | 39.8 (14.7 to 104.7)       | 40.5 (14.2 to 115.1)       | 39.0 (13.4 to 112.5)       | 43.1 (8.8 to 162.5)        | -0.6 (-12.2 to 10.9)                           | 33.6 (-83.9 to 415.4)               |
| Burkina Faso                                                                                                | 44.9 (13.5 to 119.5)       | 46.6 (11.7 to 122.6)       | 42.9 (12.2 to 110.0)       | 46.4 (7.0 to 162.4)        | -1.1 (-14.2 to 12.1)                           | 40.8 (-88.2 to 514.3)               |
| Cameroon                                                                                                    | 70.8 (23.4 to 166.7)       | 77.0 (21.8 to 180.4)       | 72.8 (22.2 to 167.7)       | 79.4 (13.2 to 255.1)       | -0.7 (-12.8 to 10.5)                           | 30.2 (-85.4 to 384.7)               |
| Cape Verde                                                                                                  | 36.6 (14.9 to 75.2)        | 38.6 (16.1 to 75.5)        | 34.8 (15.7 to 68.3)        | 36.6 (9.8 to 100.2)        | -1.0 (-10.1 to 7.6)                            | 10.0 (-78.0 to 213.3)               |
| Chad                                                                                                        | 66.0 (16.4 to 192.6)       | 68.7 (16.8 to 194.5)       | 66.0 (14.9 to 194.0)       | 80.3 (7.4 to 319.6)        | -0.8 (-16.4 to 14.5)                           | 72.6 (-91.5 to 774.5)               |
| Cote d'Ivoire                                                                                               | 25.3 (8.8 to 60.6)         | 27.7 (9.0 to 68.3)         | 25.9 (8.8 to 57.9)         | 28.8 (5.6 to 84.8)         | -0.5 (-12.6 to 11.3)                           | 37.8 (-85.0 to 440.8)               |
| The Gambia                                                                                                  | 34.6 (15.5 to 66.1)        | 36.3 (15.7 to 73.5)        | 34.0 (15.4 to 67.3)        | 36.5 (10.3 to 99.3)        | -0.6 (-9.4 to 8.5)                             | 17.7 (-75.5 to 259.1)               |
| Ghana                                                                                                       | 35.0 (12.0 to 85.3)        | 34.7 (12.2 to 87.1)        | 34.7 (11.6 to 85.8)        | 37.1 (6.9 to 122.4)        | -0.5 (-12.3 to 10.2)                           | 31.4 (-84.3 to 358.7)               |
| Guinea                                                                                                      | 24.0 (8.5 to 56.2)         | 26.9 (9.2 to 65.5)         | 26.1 (8.6 to 68.9)         | 29.7 (5.3 to 93.9)         | -0.4 (-12.1 to 11.1)                           | 42.0 (-83.7 to 428.1)               |
| Guinea-Bissau                                                                                               | 30.5 (12.7 to 59.6)        | 31.8 (12.0 to 67.0)        | 29.8 (12.4 to 59.4)        | 32.0 (7.8 to 88.2)         | -0.6 (-11.0 to 9.2)                            | 21.9 (-80.8 to 298.8)               |
| Liberia                                                                                                     | 17.2 (8.5 to 30.4)         | 18.2 (8.8 to 34.4)         | 18.0 (8.9 to 34.1)         | 19.5 (6.2 to 47.1)         | -0.1 (-8.5 to 8.5)                             | 20.7 (-72.0 to 256.8)               |
| Mali                                                                                                        | 39.8 (10.1 to 117.1)       | 41.9 (9.8 to 122.5)        | 38.5 (9.7 to 116.4)        | 44.1 (5.7 to 163.6)        | -1.1 (-15.7 to 13.3)                           | 61.6 (-90.5 to 637.8)               |
| Mauritania                                                                                                  | 48.9 (12.5 to 138.2)       | 49.5 (12.3 to 137.6)       | 47.4 (11.7 to 135.4)       | 52.7 (6.7 to 199.5)        | -0.8 (-14.1 to 13.8)                           | 55.9 (-88.0 to 687.5)               |
| Niger                                                                                                       | 87.5 (19.0 to 264.3)       | 87.3 (18.7 to 273.4)       | 94.0 (18.6 to 306.8)       | 109.2 (18.6 to 463.6)      | -0.2 (-15.9 to 14.9)                           | 86.1 (-90.8 to 835.7)               |
| Nigeria                                                                                                     | 67.5 (20.0 to 213.4)       | 75.4 (18.6 to 262.4)       | 71.8 (18.8 to 270.6)       | 83.0 (10.1 to 400.8)       | -0.8 (-15.2 to 13.9)                           | 61.5 (-89.8 to 710.5)               |
| Sao Tome and Principe                                                                                       | 30.3 (14.2 to 56.6)        | 28.4 (14.0 to 54.2)        | 28.5 (13.1 to 52.2)        | 30.2 (8.9 to 79.8)         | -0.3 (-8.9 to 8.1)                             | 17.9 (-73.6 to 236.1)               |
| Senegal                                                                                                     | 41.4 (15.9 to 82.0)        | 44.3 (14.0 to 94.2)        | 40.7 (15.2 to 79.1)        | 44.1 (9.9 to 111.5)        | -0.6 (-10.9 to 9.3)                            | 23.2 (-80.6 to 302.5)               |
| Sierra Leone                                                                                                | 20.5 (9.6 to 38.4)         | 22.5 (8.9 to 46.1)         | 21.6 (9.2 to 44.2)         | 23.8 (5.7 to 64.5)         | -0.3 (-10.3 to 9.2)                            | 25.9 (-78.5 to 299.3)               |
| Togo                                                                                                        | 37.7 (13.1 to 91.1)        | 38.4 (13.0 to 91.2)        | 35.7 (12.9 to 79.5)        | 38.1 (8.1 to 122.6)        | -0.9 (-10.9 to 10.3)                           | 23.7 (-80.4 to 369.0)               |
| <b>Indicator 16.1.1: Age-standardised death rate due to interpersonal violence (per 100,000 population)</b> |                            |                            |                            |                            |                                                |                                     |
| <b>Central Europe, Eastern Europe, and Central Asia</b>                                                     |                            |                            |                            |                            |                                                |                                     |
| <b>Central Asia</b>                                                                                         |                            |                            |                            |                            |                                                |                                     |
| Armenia                                                                                                     | 4.0 (3.7 to 4.2)           | 3.2 (3.0 to 3.4)           | 3.2 (2.9 to 3.4)           | 2.7 (2.0 to 3.8)           | -1.2 (-3.0 to 1.1)                             | -15.4 (-35.8 to 17.1)               |
| Azerbaijan                                                                                                  | 5.7 (4.5 to 6.8)           | 3.4 (2.5 to 5.8)           | 3.4 (2.5 to 5.8)           | 2.9 (2.0 to 5.1)           | -1.0 (-2.6 to 0.6)                             | -13.7 (-32.0 to 10.1)               |
| Georgia                                                                                                     | 3.7 (3.5 to 3.9)           | 3.2 (3.0 to 3.5)           | 3.4 (3.1 to 3.8)           | 2.9 (2.2 to 3.9)           | -0.7 (-2.6 to 1.3)                             | -9.3 (-31.9 to 21.5)                |
| Kazakhstan                                                                                                  | 17.5 (17.0 to 18.1)        | 7.7 (7.2 to 8.2)           | 7.9 (7.3 to 8.6)           | 7.0 (4.9 to 9.6)           | -0.7 (-3.0 to 1.4)                             | -8.8 (-36.6 to 23.9)                |
| Kyrgyzstan                                                                                                  | 9.4 (8.8 to 10.0)          | 4.8 (4.5 to 5.1)           | 4.4 (4.0 to 4.8)           | 3.7 (2.7 to 4.8)           | -1.8 (-3.7 to 0.0)                             | -23.0 (-42.8 to 0.4)                |
| Mongolia                                                                                                    | 11.9 (8.6 to 14.5)         | 7.8 (6.2 to 9.6)           | 7.6 (6.0 to 9.3)           | 6.5 (4.9 to 9.3)           | -0.8 (-2.2 to 0.6)                             | -10.6 (-28.6 to 9.6)                |
| Tajikistan                                                                                                  | 6.3 (5.7 to 7.2)           | 3.0 (2.5 to 4.8)           | 3.0 (2.5 to 4.7)           | 2.6 (1.8 to 4.0)           | -1.0 (-2.7 to 0.6)                             | -13.7 (-33.4 to 9.1)                |
| Turkmenistan                                                                                                | 6.0 (5.7 to 6.2)           | 3.9 (3.6 to 4.2)           | 3.9 (3.5 to 4.4)           | 3.5 (2.6 to 4.6)           | -0.8 (-2.5 to 1.2)                             | -10.6 (-31.8 to 20.1)               |
| Uzbekistan                                                                                                  | 3.7 (3.6 to 3.9)           | 2.5 (2.3 to 2.7)           | 2.5 (2.2 to 2.9)           | 2.4 (1.8 to 3.0)           | -0.4 (-1.9 to 1.0)                             | -5.0 (-24.9 to 16.5)                |
| <b>Central Europe</b>                                                                                       |                            |                            |                            |                            |                                                |                                     |
| Albania                                                                                                     | 8.8 (2.8 to 10.7)          | 2.3 (1.8 to 3.2)           | 2.3 (1.8 to 3.2)           | 1.9 (1.3 to 2.8)           | -1.3 (-2.9 to 0.1)                             | -17.2 (-35.4 to 1.2)                |
| Bosnia and Herzegovina                                                                                      | 2.9 (1.8 to 3.6)           | 2.0 (1.4 to 2.3)           | 2.0 (1.4 to 2.3)           | 1.7 (1.1 to 2.1)           | -1.2 (-2.3 to 0.1)                             | -16.1 (-29.6 to 1.1)                |
| Bulgaria                                                                                                    | 3.9 (3.7 to 4.0)           | 1.9 (1.8 to 2.1)           | 2.0 (1.8 to 2.1)           | 1.4 (1.1 to 1.7)           | -2.4 (-4.0 to -0.8)                            | -29.9 (-45.1 to -11.9)              |
| Croatia                                                                                                     | 2.2 (2.1 to 2.3)           | 0.9 (0.9 to 1.0)           | 0.9 (0.8 to 1.0)           | 0.7 (0.5 to 0.8)           | -2.6 (-3.7 to -1.3)                            | -31.5 (-42.5 to -17.7)              |
| Czech Republic                                                                                              | 1.8 (1.7 to 1.9)           | 1.0 (0.9 to 1.0)           | 0.9 (0.9 to 1.0)           | 0.7 (0.6 to 0.8)           | -2.5 (-3.6 to -1.4)                            | -31.4 (-41.5 to -19.4)              |
| Hungary                                                                                                     | 2.5 (2.5 to 2.7)           | 1.4 (1.3 to 1.5)           | 1.2 (1.1 to 1.3)           | 0.8 (0.7 to 1.1)           | -3.3 (-4.5 to -1.7)                            | -38.5 (-49.0 to -22.7)              |
| Macedonia                                                                                                   | 2.9 (1.4 to 3.3)           | 1.5 (1.1 to 1.7)           | 1.5 (1.1 to 1.8)           | 1.3 (0.9 to 1.6)           | -1.0 (-2.2 to 0.3)                             | -13.6 (-28.5 to 5.1)                |
| Montenegro                                                                                                  | 5.0 (3.9 to 5.8)           | 2.9 (2.5 to 3.8)           | 2.9 (2.4 to 3.8)           | 2.2 (1.7 to 3.0)           | -2.0 (-3.2 to -0.8)                            | -25.1 (-37.8 to -10.7)              |
| Poland                                                                                                      | 2.8 (2.6 to 2.9)           | 1.4 (1.3 to 1.4)           | 1.4 (1.2 to 1.5)           | 0.9 (0.8 to 1.1)           | -2.5 (-3.6 to -1.3)                            | -30.8 (-42.1 to -18.2)              |
| Romania                                                                                                     | 3.1 (3.0 to 3.2)           | 1.6 (1.5 to 1.7)           | 1.6 (1.5 to 1.7)           | 1.1 (0.8 to 1.4)           | -2.8 (-4.4 to -1.1)                            | -33.6 (-48.5 to -14.7)              |
| Serbia                                                                                                      | 4.1 (2.4 to 4.5)           | 2.1 (1.6 to 2.5)           | 2.0 (1.5 to 2.4)           | 1.7 (1.4 to 2.4)           | -1.3 (-2.7 to 0.3)                             | -17.7 (-33.2 to 4.3)                |
| Slovakia                                                                                                    | 3.0 (2.5 to 3.7)           | 2.0 (1.8 to 2.8)           | 1.9 (1.6 to 2.6)           | 1.4 (1.1 to 2.0)           | -2.3 (-3.6 to -1.1)                            | -29.1 (-41.3 to -15.3)              |
| Slovenia                                                                                                    | 1.6 (1.5 to 1.7)           | 0.8 (0.7 to 0.8)           | 0.8 (0.7 to 0.9)           | 0.5 (0.4 to 0.7)           | -2.6 (-4.1 to -1.1)                            | -32.4 (-45.5 to -15.3)              |
| <b>Eastern Europe</b>                                                                                       |                            |                            |                            |                            |                                                |                                     |

|                                    | Estimate in 2000 (95% UIs) | Estimate in 2015 (95% UIs) | Estimate in 2017 (95% UIs) | Estimate in 2020 (95% UIs) | Annualised rate of change, 2015-2020 (95% UIs) | Percent change, 2015-2020 (95% UIs) |
|------------------------------------|----------------------------|----------------------------|----------------------------|----------------------------|------------------------------------------------|-------------------------------------|
| Belarus                            | 11.5 (11.1 to 12.0)        | 5.4 (5.0 to 5.8)           | 5.2 (4.7 to 5.7)           | 4.2 (3.2 to 5.5)           | -1.7 (-3.4 to 0.0)                             | -22.2 (-40.2 to 0.6)                |
| Estonia                            | 13.4 (12.7 to 14.1)        | 3.6 (3.3 to 4.0)           | 3.7 (3.1 to 4.3)           | 2.5 (1.6 to 3.8)           | -2.5 (-5.5 to 0.2)                             | -30.1 (-56.1 to -3.3)               |
| Latvia                             | 11.6 (11.1 to 12.1)        | 5.4 (5.1 to 5.8)           | 5.4 (4.7 to 6.2)           | 3.9 (2.4 to 6.0)           | -2.4 (-5.4 to 0.7)                             | -27.9 (-55.2 to 10.2)               |
| Lithuania                          | 9.1 (8.7 to 9.6)           | 5.0 (4.7 to 5.3)           | 4.8 (4.4 to 5.3)           | 3.9 (2.9 to 5.2)           | -1.8 (-3.7 to 0.2)                             | -22.7 (-42.5 to 2.5)                |
| Moldova                            | 10.9 (10.4 to 11.4)        | 5.1 (4.8 to 5.4)           | 4.8 (4.5 to 5.1)           | 4.4 (3.1 to 6.1)           | -1.1 (-3.2 to 1.1)                             | -13.6 (-38.6 to 18.8)               |
| Russia                             | 29.7 (29.2 to 30.1)        | 12.8 (12.6 to 13.1)        | 12.2 (11.9 to 12.5)        | 9.3 (5.4 to 14.2)          | -2.3 (-5.4 to 0.7)                             | -27.4 (-55.3 to 11.4)               |
| Ukraine                            | 13.9 (13.3 to 14.5)        | 9.2 (8.7 to 9.8)           | 8.4 (7.7 to 9.2)           | 7.0 (4.5 to 10.3)          | -2.0 (-4.8 to 0.8)                             | -24.2 (-51.5 to 12.5)               |
| <b>High-income</b>                 |                            |                            |                            |                            |                                                |                                     |
| <b>Australasia</b>                 |                            |                            |                            |                            |                                                |                                     |
| Australia                          | 1.7 (1.6 to 1.8)           | 1.3 (1.2 to 1.4)           | 1.3 (1.1 to 1.4)           | 1.0 (0.8 to 1.1)           | -2.0 (-3.0 to -1.0)                            | -25.4 (-36.3 to -13.5)              |
| New Zealand                        | 1.7 (1.6 to 1.8)           | 1.3 (1.2 to 1.4)           | 1.3 (1.2 to 1.4)           | 0.9 (0.8 to 1.1)           | -2.0 (-2.8 to -1.2)                            | -26.1 (-34.6 to -15.9)              |
| <b>High-income Asia Pacific</b>    |                            |                            |                            |                            |                                                |                                     |
| Brunei                             | 1.4 (1.0 to 1.6)           | 1.4 (1.0 to 1.6)           | 1.4 (1.0 to 1.6)           | 1.2 (0.8 to 1.4)           | -1.2 (-2.2 to -0.3)                            | -16.7 (-28.3 to -3.7)               |
| Japan                              | 0.8 (0.8 to 0.8)           | 0.5 (0.5 to 0.5)           | 0.5 (0.4 to 0.5)           | 0.3 (0.3 to 0.4)           | -2.0 (-2.7 to -1.3)                            | -25.8 (-33.5 to -17.5)              |
| South Korea                        | 2.2 (2.1 to 2.3)           | 1.1 (1.0 to 1.1)           | 1.0 (0.9 to 1.1)           | 0.8 (0.7 to 0.9)           | -2.1 (-3.1 to -1.1)                            | -27.1 (-37.3 to -14.7)              |
| Singapore                          | 1.3 (1.2 to 1.4)           | 0.4 (0.4 to 0.4)           | 0.4 (0.4 to 0.4)           | 0.3 (0.3 to 0.4)           | -2.0 (-3.1 to -0.9)                            | -25.4 (-37.6 to -12.9)              |
| <b>High-income North America</b>   |                            |                            |                            |                            |                                                |                                     |
| Canada                             | 1.3 (1.3 to 1.4)           | 1.6 (1.4 to 1.7)           | 1.5 (1.3 to 1.6)           | 1.1 (1.0 to 1.3)           | -2.2 (-2.9 to -1.4)                            | -27.5 (-34.8 to -19.5)              |
| Greenland                          | 13.8 (10.6 to 15.8)        | 7.9 (6.6 to 9.5)           | 7.6 (6.4 to 9.3)           | 6.2 (4.5 to 8.5)           | -1.7 (-3.4 to 0.4)                             | -22.0 (-40.1 to 5.5)                |
| United States                      | 6.8 (6.7 to 6.9)           | 5.8 (5.8 to 6.0)           | 6.2 (6.0 to 6.5)           | 4.9 (3.9 to 5.8)           | -1.3 (-2.7 to -0.1)                            | -17.3 (-33.1 to -1.7)               |
| <b>Southern Latin America</b>      |                            |                            |                            |                            |                                                |                                     |
| Argentina                          | 6.3 (6.1 to 6.5)           | 6.0 (5.6 to 6.3)           | 5.8 (5.0 to 6.7)           | 4.8 (4.1 to 5.8)           | -1.4 (-2.4 to -0.3)                            | -18.8 (-30.6 to -3.9)               |
| Chile                              | 4.8 (4.6 to 5.0)           | 4.2 (4.0 to 4.5)           | 4.1 (3.6 to 4.8)           | 3.3 (2.8 to 4.0)           | -1.6 (-2.7 to -0.5)                            | -21.5 (-33.7 to -7.5)               |
| Uruguay                            | 5.0 (4.7 to 5.2)           | 6.2 (5.8 to 6.6)           | 5.8 (5.0 to 6.7)           | 5.2 (4.2 to 6.5)           | -1.2 (-2.5 to 0.3)                             | -15.7 (-31.3 to 5.0)                |
| <b>Western Europe</b>              |                            |                            |                            |                            |                                                |                                     |
| Andorra                            | 0.8 (0.7 to 1.3)           | 0.7 (0.5 to 1.0)           | 0.6 (0.5 to 1.0)           | 0.5 (0.4 to 0.8)           | -1.6 (-2.4 to -0.8)                            | -21.4 (-29.7 to -11.8)              |
| Austria                            | 0.9 (0.8 to 0.9)           | 0.7 (0.7 to 0.8)           | 0.7 (0.6 to 0.7)           | 0.5 (0.4 to 0.6)           | -2.6 (-3.4 to -1.8)                            | -31.9 (-39.6 to -23.6)              |
| Belgium                            | 2.1 (2.0 to 2.2)           | 1.2 (1.1 to 1.3)           | 1.2 (1.1 to 1.3)           | 0.9 (0.8 to 1.0)           | -2.2 (-3.0 to -1.4)                            | -27.7 (-35.8 to -18.6)              |
| Cyprus                             | 2.1 (1.3 to 2.5)           | 1.4 (0.9 to 1.6)           | 1.4 (0.8 to 1.6)           | 1.0 (0.6 to 1.3)           | -2.1 (-3.1 to -1.0)                            | -27.1 (-37.5 to -13.9)              |
| Denmark                            | 1.4 (1.4 to 1.5)           | 0.7 (0.7 to 0.7)           | 0.7 (0.7 to 0.8)           | 0.5 (0.4 to 0.6)           | -1.9 (-3.1 to -0.7)                            | -24.1 (-36.8 to -9.4)               |
| Finland                            | 2.7 (2.5 to 2.8)           | 1.4 (1.3 to 1.5)           | 1.4 (1.3 to 1.6)           | 1.0 (0.9 to 1.2)           | -2.0 (-3.1 to -0.8)                            | -25.2 (-37.6 to -11.2)              |
| France                             | 1.2 (1.1 to 1.2)           | 0.8 (0.8 to 0.8)           | 0.8 (0.7 to 0.8)           | 0.5 (0.5 to 0.6)           | -2.7 (-3.4 to -1.9)                            | -32.7 (-39.9 to -24.8)              |
| Germany                            | 1.1 (1.1 to 1.2)           | 0.7 (0.7 to 0.7)           | 0.7 (0.6 to 0.8)           | 0.5 (0.4 to 0.6)           | -2.3 (-3.2 to -1.4)                            | -28.9 (-38.1 to -18.4)              |
| Greece                             | 1.0 (0.9 to 1.1)           | 1.0 (1.0 to 1.1)           | 1.0 (0.9 to 1.1)           | 0.7 (0.6 to 0.8)           | -2.1 (-3.0 to -1.2)                            | -27.4 (-36.3 to -16.7)              |
| Iceland                            | 0.9 (0.9 to 1.0)           | 0.7 (0.6 to 0.7)           | 0.7 (0.6 to 0.7)           | 0.6 (0.4 to 0.7)           | -1.3 (-2.6 to 0.2)                             | -17.2 (-31.9 to 3.1)                |
| Ireland                            | 1.0 (1.0 to 1.1)           | 0.7 (0.6 to 0.7)           | 0.6 (0.6 to 0.7)           | 0.5 (0.4 to 0.6)           | -2.1 (-3.0 to -1.1)                            | -27.1 (-36.6 to -15.7)              |
| Israel                             | 3.0 (2.8 to 3.2)           | 2.1 (2.0 to 2.3)           | 2.1 (1.9 to 2.3)           | 1.4 (1.1 to 1.9)           | -3.0 (-4.1 to -1.9)                            | -36.4 (-46.2 to -24.3)              |
| Italy                              | 1.2 (1.1 to 1.2)           | 0.7 (0.7 to 0.7)           | 0.7 (0.6 to 0.7)           | 0.5 (0.4 to 0.5)           | -2.9 (-3.6 to -2.1)                            | -34.8 (-41.5 to -27.4)              |
| Luxembourg                         | 1.5 (1.4 to 1.6)           | 0.9 (0.9 to 1.0)           | 0.9 (0.8 to 1.0)           | 0.7 (0.5 to 1.0)           | -2.2 (-3.9 to -0.5)                            | -27.5 (-44.6 to -7.8)               |
| Malta                              | 1.4 (1.2 to 1.4)           | 1.1 (1.0 to 1.1)           | 1.1 (1.0 to 1.2)           | 0.7 (0.6 to 0.9)           | -2.4 (-3.8 to -0.9)                            | -30.1 (-43.1 to -13.0)              |
| Netherlands                        | 1.4 (1.4 to 1.5)           | 0.8 (0.7 to 0.8)           | 0.8 (0.7 to 0.9)           | 0.5 (0.5 to 0.7)           | -2.0 (-2.8 to -1.3)                            | -26.0 (-34.3 to -17.5)              |
| Norway                             | 1.1 (1.1 to 1.2)           | 0.7 (0.6 to 0.7)           | 0.7 (0.6 to 0.7)           | 0.5 (0.5 to 0.6)           | -1.4 (-2.3 to -0.5)                            | -19.0 (-28.8 to -6.8)               |
| Portugal                           | 2.2 (2.1 to 2.4)           | 1.1 (1.0 to 1.2)           | 1.1 (0.9 to 1.1)           | 0.7 (0.6 to 0.8)           | -2.9 (-4.1 to -1.7)                            | -35.5 (-45.8 to -22.9)              |
| Spain                              | 1.0 (0.9 to 1.0)           | 0.6 (0.6 to 0.6)           | 0.6 (0.5 to 0.6)           | 0.4 (0.3 to 0.5)           | -3.4 (-4.6 to -2.0)                            | -39.9 (-49.6 to -25.9)              |
| Sweden                             | 1.3 (1.2 to 1.4)           | 1.1 (1.1 to 1.2)           | 1.1 (1.0 to 1.2)           | 0.8 (0.7 to 0.9)           | -2.4 (-3.2 to -1.5)                            | -30.0 (-38.3 to -20.3)              |
| Switzerland                        | 1.1 (1.1 to 1.2)           | 0.6 (0.6 to 0.6)           | 0.6 (0.5 to 0.6)           | 0.4 (0.3 to 0.5)           | -2.7 (-4.0 to -1.5)                            | -33.2 (-44.8 to -20.2)              |
| United Kingdom                     | 0.8 (0.7 to 0.8)           | 0.5 (0.5 to 0.5)           | 0.5 (0.5 to 0.5)           | 0.4 (0.3 to 0.4)           | -2.0 (-2.7 to -1.3)                            | -25.8 (-33.4 to -18.0)              |
| <b>Latin America and Caribbean</b> |                            |                            |                            |                            |                                                |                                     |
| <b>Andean Latin America</b>        |                            |                            |                            |                            |                                                |                                     |
| Bolivia                            | 9.0 (7.2 to 11.3)          | 6.1 (4.2 to 8.0)           | 5.9 (3.9 to 7.8)           | 4.7 (3.1 to 6.4)           | -1.7 (-2.4 to -1.0)                            | -22.8 (-30.6 to -14.4)              |
| Ecuador                            | 20.2 (19.5 to 20.9)        | 13.0 (12.1 to 14.1)        | 13.4 (11.8 to 15.2)        | 11.2 (9.7 to 12.9)         | -1.0 (-2.0 to -0.1)                            | -14.1 (-25.5 to -1.5)               |
| Peru                               | 4.8 (3.7 to 5.6)           | 3.6 (2.6 to 4.2)           | 3.5 (2.5 to 4.3)           | 2.6 (1.8 to 3.4)           | -2.1 (-3.7 to -0.7)                            | -27.0 (-42.7 to -9.4)               |
| <b>Caribbean</b>                   |                            |                            |                            |                            |                                                |                                     |
| Antigua and Barbuda                | 4.4 (4.0 to 4.8)           | 4.9 (4.5 to 5.4)           | 4.9 (4.4 to 5.5)           | 4.5 (3.3 to 6.5)           | -0.7 (-2.7 to 1.9)                             | -8.4 (-33.2 to 32.2)                |
| The Bahamas                        | 19.1 (18.0 to 20.0)        | 27.5 (25.4 to 29.7)        | 26.2 (23.5 to 29.2)        | 23.5 (17.8 to 32.6)        | -1.1 (-2.8 to 1.1)                             | -14.6 (-33.8 to 17.5)               |
| Barbados                           | 9.7 (9.0 to 10.4)          | 10.5 (9.5 to 11.4)         | 10.4 (9.3 to 11.5)         | 9.0 (7.6 to 10.8)          | -1.0 (-1.9 to 0.0)                             | -13.8 (-24.9 to 0.6)                |
| Belize                             | 20.8 (19.7 to 21.9)        | 25.6 (24.2 to 27.0)        | 25.6 (23.9 to 27.4)        | 22.3 (17.8 to 29.1)        | -1.0 (-2.4 to 0.8)                             | -13.1 (-30.3 to 13.0)               |
| Bermuda                            | 2.8 (2.5 to 3.1)           | 2.9 (2.5 to 3.2)           | 2.8 (2.5 to 3.3)           | 1.9 (1.1 to 3.8)           | -3.0 (-6.2 to 1.9)                             | -32.4 (-60.7 to 32.1)               |
| Cuba                               | 5.2 (5.0 to 5.4)           | 5.4 (5.2 to 5.7)           | 5.4 (4.8 to 6.2)           | 4.2 (3.4 to 5.2)           | -1.8 (-3.0 to -0.4)                            | -22.9 (-36.7 to -6.5)               |
| Dominica                           | 6.2 (5.7 to 6.7)           | 11.4 (10.4 to 12.4)        | 11.4 (10.2 to 12.5)        | 10.5 (8.4 to 13.3)         | -0.6 (-1.9 to 0.8)                             | -8.0 (-24.7 to 13.5)                |
| Dominican Republic                 | 13.5 (11.4 to 16.2)        | 21.8 (12.4 to 25.9)        | 21.1 (12.4 to 26.0)        | 18.0 (10.2 to 22.8)        | -1.3 (-2.4 to -0.2)                            | -17.3 (-30.2 to -3.0)               |
| Grenada                            | 4.9 (4.5 to 5.3)           | 4.9 (4.4 to 5.3)           | 5.0 (4.6 to 5.6)           | 4.5 (3.7 to 5.4)           | -0.6 (-1.7 to 0.5)                             | -8.6 (-22.1 to 7.2)                 |
| Guyana                             | 16.2 (15.2 to 17.1)        | 17.3 (15.7 to 18.9)        | 16.4 (14.1 to 18.9)        | 14.8 (11.4 to 19.7)        | -1.1 (-2.6 to 0.8)                             | -14.7 (-32.3 to 13.3)               |
| Haiti                              | 21.2 (15.2 to 30.8)        | 18.7 (12.5 to 27.6)        | 18.2 (12.2 to 27.5)        | 14.5 (9.6 to 21.6)         | -1.7 (-2.3 to -1.1)                            | -22.5 (-29.5 to -14.7)              |
| Jamaica                            | 16.7 (16.1 to 17.4)        | 32.7 (28.1 to 37.7)        | 29.0 (24.0 to 34.8)        | 26.9 (20.5 to 35.7)        | -1.3 (-2.6 to 0.3)                             | -17.7 (-32.1 to 4.3)                |
| Puerto Rico                        | 19.3 (18.7 to 19.9)        | 20.2 (19.5 to 20.9)        | 21.5 (19.8 to 23.1)        | 13.9 (11.0 to 17.5)        | -2.5 (-4.0 to -1.0)                            | -31.2 (-45.4 to -14.3)              |
| Saint Lucia                        | 14.5 (13.7 to 15.3)        | 17.1 (15.8 to 18.3)        | 16.9 (15.4 to 18.4)        | 14.4 (12.2 to 17.7)        | -1.1 (-2.1 to 0.1)                             | -15.5 (-27.3 to 1.6)                |
| Saint Vincent and the Grenadines   | 14.3 (13.4 to 15.2)        | 19.8 (18.4 to 21.2)        | 19.7 (18.1 to 21.4)        | 17.9 (14.6 to 22.4)        | -0.7 (-1.8 to 0.7)                             | -9.9 (-23.9 to 11.6)                |
| Suriname                           | 8.8 (7.9 to 9.7)           | 8.7 (7.8 to 9.7)           | 8.7 (7.6 to 10.0)          | 7.5 (6.2 to 8.9)           | -1.0 (-1.9 to -0.1)                            | -13.7 (-24.5 to -1.3)               |
| Trinidad and Tobago                | 11.0 (10.5 to 11.6)        | 22.0 (17.9 to 26.6)        | 21.2 (16.6 to 26.4)        | 19.2 (14.3 to 26.4)        | -0.9 (-2.6 to 1.0)                             | -12.3 (-31.8 to 15.7)               |
| Virgin Islands, U.S.               | 20.3 (19.2 to 21.5)        | 26.2 (23.7 to 29.8)        | 26.3 (23.6 to 30.0)        | 16.0 (13.0 to 19.7)        | -3.3 (-4.5 to -2.1)                            | -38.8 (-49.2 to -26.9)              |
| <b>Central Latin America</b>       |                            |                            |                            |                            |                                                |                                     |
| Colombia                           | 81.3 (80.5 to 82.1)        | 27.5 (26.3 to 29.8)        | 28.3 (24.3 to 33.1)        | 21.9 (17.1 to 27.7)        | -1.6 (-3.1 to -0.0)                            | -20.5 (-37.2 to -0.5)               |
| Costa Rica                         | 6.0 (5.8 to 6.3)           | 9.3 (8.8 to 9.9)           | 9.4 (8.5 to 10.4)          | 7.9 (6.8 to 9.0)           | -1.1 (-1.9 to -0.3)                            | -15.2 (-25.2 to -5.1)               |
| El Salvador                        | 56.2 (44.4 to 60.9)        | 105.8 (90.5 to 114.2)      | 53.5 (38.3 to 65.4)        | 46.7 (31.4 to 60.2)        | -5.5 (-7.1 to -4.0)                            | -56.1 (-65.4 to -44.9)              |
| Guatemala                          | 37.8 (36.8 to 39.1)        | 33.2 (32.0 to 34.4)        | 35.8 (31.6 to 40.3)        | 31.3 (26.2 to 37.4)        | -0.4 (-1.5 to 0.8)                             | -5.7 (-20.4 to 12.9)                |
| Honduras                           | 54.9 (40.5 to 66.2)        | 102.6 (84.9 to 115.2)      | 46.2 (30.0 to 58.2)        | 39.1 (25.4 to 49.2)        | -6.5 (-8.1 to -5.0)                            | -62.1 (-70.4 to -56.5)              |
| Mexico                             | 13.4 (13.2 to 13.6)        | 21.8 (21.5 to 22.0)        | 32.4 (31.9 to 32.9)        | 27.4 (22.9 to 33.9)        | 1.5 (0.3 to 2.9)                               | 25.7 (5.1 to 55.6)                  |
| Nicaragua                          | 12.3 (9.6 to 14.0)         | 7.7 (6.7 to 10.6)          | 7.3 (6.0 to 10.4)          | 6.3 (5.0 to 8.8)           | -1.3 (-2.4 to -0.1)                            | -18.0 (-30.3 to -1.2)               |
| Panama                             | 10.2 (9.8 to 10.7)         | 16.9 (16.1 to 17.6)        | 15.8 (14.4 to 17.3)        | 13.0 (10.8 to 15.5)        | -1.8 (-2.9 to -0.6)                            | -22.8 (-35.3 to -8.0)               |

|                                               | Estimate in 2000 (95% UIs) | Estimate in 2015 (95% UIs) | Estimate in 2017 (95% UIs) | Estimate in 2030 (95% UIs) | Annualised rate of change, 2015-2030 (95% UIs) | Percent change, 2015-2030 (95% UIs) |
|-----------------------------------------------|----------------------------|----------------------------|----------------------------|----------------------------|------------------------------------------------|-------------------------------------|
| Venezuela                                     | 33.2 (32.5 to 34.0)        | 44.3 (41.1 to 47.5)        | 44.1 (36.5 to 52.3)        | 42.7 (29.8 to 60.6)        | -0.4 (-2.4 to 1.9)                             | -3.8 (-30.7 to 32.4)                |
| <b>Tropical Latin America</b>                 |                            |                            |                            |                            |                                                |                                     |
| Brazil                                        | 29.8 (29.3 to 30.3)        | 27.8 (27.4 to 28.1)        | 27.7 (27.2 to 28.1)        | 24.3 (21.4 to 27.0)        | -0.9 (-1.8 to -0.2)                            | -12.5 (-23.2 to -3.0)               |
| Paraguay                                      | 18.2 (13.2 to 20.2)        | 11.8 (9.6 to 15.6)         | 11.9 (9.1 to 15.9)         | 10.6 (7.7 to 14.4)         | -0.7 (-2.3 to 0.8)                             | -9.6 (-28.9 to 12.2)                |
| <b>North Africa and Middle East</b>           |                            |                            |                            |                            |                                                |                                     |
| <b>North Africa and Middle East</b>           |                            |                            |                            |                            |                                                |                                     |
| Afghanistan                                   | 16.2 (8.8 to 21.9)         | 14.3 (8.8 to 19.0)         | 12.1 (6.9 to 16.6)         | 9.7 (5.5 to 13.5)          | -2.6 (-3.4 to -1.9)                            | -32.6 (-40.2 to -25.1)              |
| Algeria                                       | 1.7 (1.0 to 2.1)           | 1.0 (0.7 to 1.3)           | 1.0 (0.7 to 1.2)           | 0.8 (0.5 to 1.0)           | -1.9 (-2.6 to -1.2)                            | -24.3 (-32.1 to -16.3)              |
| Bahrain                                       | 2.0 (1.6 to 2.4)           | 1.4 (0.9 to 1.6)           | 1.3 (0.9 to 1.6)           | 1.0 (0.7 to 1.4)           | -2.1 (-3.3 to -0.7)                            | -26.2 (-39.3 to -9.9)               |
| Egypt                                         | 0.4 (0.4 to 0.6)           | 0.7 (0.4 to 0.8)           | 0.7 (0.4 to 0.8)           | 0.5 (0.3 to 0.7)           | -1.7 (-2.8 to -0.7)                            | -22.6 (-34.7 to -10.1)              |
| Iran                                          | 2.5 (2.0 to 3.1)           | 2.3 (1.5 to 2.5)           | 2.2 (1.4 to 2.4)           | 1.7 (1.2 to 2.0)           | -2.1 (-3.1 to -1.2)                            | -26.9 (-37.4 to -16.1)              |
| Iraq                                          | 7.5 (6.0 to 12.1)          | 6.3 (3.4 to 7.4)           | 5.7 (3.2 to 6.8)           | 4.7 (2.6 to 5.7)           | -2.0 (-2.6 to -1.4)                            | -25.9 (-32.5 to -18.9)              |
| Jordan                                        | 4.0 (2.6 to 4.7)           | 2.6 (1.5 to 3.1)           | 2.6 (1.5 to 3.1)           | 2.1 (1.1 to 2.6)           | -1.6 (-2.5 to -0.8)                            | -21.7 (-30.9 to -11.5)              |
| Kuwait                                        | 1.8 (1.7 to 1.9)           | 0.8 (0.7 to 0.8)           | 0.8 (0.7 to 0.9)           | 0.6 (0.4 to 0.9)           | -1.6 (-4.0 to 0.9)                             | -20.3 (-44.9 to 14.7)               |
| Lebanon                                       | 5.9 (4.2 to 7.0)           | 6.0 (4.2 to 7.3)           | 4.1 (2.3 to 5.4)           | 3.2 (1.7 to 4.4)           | -4.3 (-6.0 to -2.8)                            | -47.2 (-59.6 to -34.5)              |
| Libya                                         | 2.2 (1.5 to 2.7)           | 11.7 (10.6 to 12.5)        | 2.1 (1.1 to 2.9)           | 1.8 (1.0 to 2.5)           | -12.6 (-16.0 to -10.7)                         | -84.5 (-91.0 to -79.8)              |
| Morocco                                       | 1.3 (0.8 to 1.6)           | 1.1 (0.6 to 1.4)           | 1.1 (0.6 to 1.4)           | 0.9 (0.5 to 1.2)           | -1.5 (-2.3 to -0.8)                            | -20.3 (-28.7 to -11.5)              |
| Palestine                                     | 2.8 (2.3 to 5.0)           | 6.6 (2.3 to 8.2)           | 5.7 (2.2 to 7.1)           | 5.4 (1.9 to 7.7)           | -1.3 (-2.6 to 0.5)                             | -17.3 (-32.7 to 7.3)                |
| Oman                                          | 0.7 (0.5 to 0.9)           | 0.5 (0.4 to 0.7)           | 0.5 (0.4 to 0.7)           | 0.4 (0.3 to 0.7)           | -1.4 (-2.5 to -0.3)                            | -18.1 (-31.6 to -4.2)               |
| Qatar                                         | 0.9 (0.7 to 1.3)           | 0.8 (0.6 to 1.1)           | 0.8 (0.6 to 1.0)           | 0.6 (0.4 to 0.8)           | -1.9 (-3.2 to -0.5)                            | -24.5 (-37.9 to -7.6)               |
| Saudi Arabia                                  | 0.8 (0.5 to 0.9)           | 0.8 (0.4 to 1.0)           | 0.7 (0.4 to 1.0)           | 0.5 (0.2 to 0.7)           | -2.9 (-4.5 to -1.5)                            | -35.3 (-49.2 to -20.6)              |
| Sudan                                         | 2.2 (2.1 to 2.4)           | 3.5 (2.6 to 3.9)           | 1.1 (0.3 to 1.5)           | 0.9 (0.2 to 1.3)           | -9.4 (-15.8 to -7.5)                           | -74.4 (-90.7 to -67.3)              |
| Syria                                         | 2.5 (1.5 to 3.0)           | 6.3 (5.3 to 6.9)           | 2.0 (1.1 to 2.6)           | 1.7 (0.9 to 2.3)           | -8.9 (-12.0 to -7.3)                           | -73.2 (-83.5 to -66.4)              |
| Tunisia                                       | 0.8 (0.5 to 0.9)           | 0.6 (0.4 to 0.7)           | 0.5 (0.3 to 0.7)           | 0.5 (0.3 to 0.8)           | -1.6 (-2.3 to -0.8)                            | -20.7 (-29.7 to -11.2)              |
| Turkey                                        | 2.6 (2.0 to 3.2)           | 2.0 (1.2 to 2.3)           | 2.0 (1.2 to 2.4)           | 1.4 (0.8 to 1.9)           | -2.3 (-3.7 to -0.9)                            | -28.4 (-42.5 to -12.6)              |
| United Arab Emirates                          | 1.1 (0.9 to 1.5)           | 1.0 (0.7 to 1.4)           | 1.0 (0.7 to 1.4)           | 0.6 (0.4 to 0.9)           | -3.3 (-4.3 to -2.3)                            | -39.2 (-47.5 to -29.2)              |
| Yemen                                         | 3.7 (2.5 to 5.0)           | 4.3 (3.2 to 5.5)           | 3.1 (2.0 to 4.2)           | 2.5 (1.6 to 3.5)           | -3.6 (-4.7 to -2.7)                            | -41.8 (-50.5 to -33.4)              |
| <b>South Asia</b>                             |                            |                            |                            |                            |                                                |                                     |
| <b>South Asia</b>                             |                            |                            |                            |                            |                                                |                                     |
| Bangladesh                                    | 2.5 (2.0 to 4.3)           | 1.6 (1.3 to 2.6)           | 1.5 (1.2 to 2.5)           | 1.2 (0.9 to 2.0)           | -1.8 (-2.4 to -1.1)                            | -23.2 (-30.6 to -15.8)              |
| Bhutan                                        | 1.8 (1.0 to 2.1)           | 1.0 (0.6 to 1.2)           | 0.9 (0.6 to 1.2)           | 0.9 (0.5 to 0.9)           | -1.9 (-2.4 to -1.3)                            | -24.1 (-30.7 to -17.3)              |
| India                                         | 4.5 (3.4 to 5.1)           | 3.1 (2.5 to 3.8)           | 3.0 (2.5 to 3.8)           | 2.8 (2.2 to 3.5)           | -0.8 (-1.5 to -0.1)                            | -10.6 (-19.9 to -4.3)               |
| Nepal                                         | 1.9 (0.9 to 2.4)           | 1.7 (0.7 to 2.3)           | 1.6 (0.7 to 2.2)           | 1.4 (0.6 to 1.9)           | -1.4 (-2.0 to -0.8)                            | -19.2 (-25.9 to -11.7)              |
| Pakistan                                      | 5.6 (3.7 to 6.5)           | 4.5 (2.8 to 5.9)           | 4.2 (2.7 to 5.6)           | 3.5 (2.1 to 4.8)           | -1.7 (-2.5 to -0.8)                            | -22.1 (-31.7 to -10.9)              |
| <b>Southeast Asia, East Asia, and Oceania</b> |                            |                            |                            |                            |                                                |                                     |
| <b>East Asia</b>                              |                            |                            |                            |                            |                                                |                                     |
| China                                         | 2.6 (1.8 to 2.8)           | 1.0 (0.9 to 1.4)           | 0.9 (0.8 to 1.3)           | 0.7 (0.6 to 1.1)           | -2.1 (-2.9 to -1.2)                            | -26.8 (-35.2 to -16.6)              |
| North Korea                                   | 3.1 (2.2 to 4.0)           | 2.6 (1.9 to 3.4)           | 2.6 (1.9 to 3.4)           | 2.3 (1.6 to 3.1)           | -0.8 (-1.6 to -0.0)                            | -11.3 (-21.5 to -0.0)               |
| Taiwan (Province of China)                    | 3.1 (3.0 to 3.2)           | 1.1 (1.1 to 1.2)           | 1.2 (1.1 to 1.3)           | 0.9 (0.8 to 1.1)           | -1.2 (-2.3 to -0.1)                            | -16.3 (-28.9 to -2.1)               |
| <b>Oceania</b>                                |                            |                            |                            |                            |                                                |                                     |
| American Samoa                                | 6.5 (5.4 to 8.4)           | 5.5 (4.7 to 7.7)           | 5.4 (4.6 to 7.6)           | 4.6 (3.8 to 6.3)           | -1.2 (-1.8 to -0.6)                            | -16.2 (-24.0 to -8.0)               |
| Federated States of Micronesia                | 6.8 (4.4 to 9.2)           | 5.8 (3.4 to 8.1)           | 5.1 (2.9 to 7.6)           | 5.1 (2.9 to 7.6)           | -0.9 (-2.1 to 0.2)                             | -12.1 (-26.5 to 3.2)                |
| Fiji                                          | 4.7 (3.0 to 5.3)           | 4.0 (2.5 to 4.7)           | 3.9 (2.4 to 4.7)           | 3.7 (2.2 to 4.9)           | -0.6 (-1.7 to 0.8)                             | -7.7 (-22.7 to 12.5)                |
| Guam                                          | 3.7 (3.2 to 4.8)           | 4.7 (3.7 to 5.7)           | 4.7 (3.7 to 5.7)           | 3.5 (2.6 to 4.5)           | -1.9 (-3.1 to -0.8)                            | -24.7 (-37.3 to -10.8)              |
| Kiribati                                      | 2.2 (1.6 to 5.2)           | 1.8 (1.1 to 4.8)           | 1.8 (1.1 to 4.7)           | 1.5 (0.9 to 4.1)           | -1.1 (-1.7 to -0.5)                            | -15.6 (-22.9 to -7.1)               |
| Marshall Islands                              | 7.1 (5.1 to 8.7)           | 6.4 (4.3 to 8.0)           | 6.2 (4.2 to 7.8)           | 5.3 (3.4 to 7.0)           | -1.3 (-2.1 to -0.5)                            | -17.0 (-27.0 to -6.6)               |
| Northern Mariana Islands                      | 5.1 (4.0 to 6.2)           | 4.7 (3.8 to 6.1)           | 4.7 (3.8 to 6.3)           | 3.9 (3.1 to 5.3)           | -1.2 (-1.9 to -0.5)                            | -16.6 (-25.0 to -7.2)               |
| Papua New Guinea                              | 12.6 (7.7 to 16.4)         | 11.1 (6.6 to 14.5)         | 10.8 (6.5 to 14.1)         | 8.9 (5.2 to 11.9)          | -1.5 (-2.1 to -0.9)                            | -19.8 (-26.9 to -12.4)              |
| Samoa                                         | 4.1 (2.8 to 5.7)           | 3.4 (2.2 to 5.2)           | 3.4 (2.2 to 5.2)           | 2.9 (1.9 to 4.4)           | -1.2 (-1.9 to -0.6)                            | -16.8 (-24.3 to -9.2)               |
| Solomon Islands                               | 6.5 (4.2 to 8.3)           | 5.7 (3.5 to 7.4)           | 5.6 (3.4 to 7.2)           | 4.7 (2.8 to 6.2)           | -1.3 (-2.0 to -0.7)                            | -17.9 (-25.7 to -9.5)               |
| Tonga                                         | 2.8 (2.0 to 6.4)           | 2.3 (1.4 to 6.5)           | 2.3 (1.3 to 6.4)           | 2.0 (1.2 to 5.8)           | -0.9 (-1.6 to -0.3)                            | -13.1 (-21.0 to -4.5)               |
| Vanuatu                                       | 2.0 (1.3 to 2.8)           | 1.8 (1.1 to 2.5)           | 1.8 (1.1 to 2.5)           | 1.5 (1.0 to 2.1)           | -1.1 (-1.8 to -0.3)                            | -14.5 (-23.9 to -4.0)               |
| <b>Southeast Asia</b>                         |                            |                            |                            |                            |                                                |                                     |
| Cambodia                                      | 3.5 (2.2 to 4.0)           | 2.4 (1.6 to 3.1)           | 2.3 (1.6 to 3.1)           | 2.0 (1.4 to 2.6)           | -1.3 (-2.0 to -0.7)                            | -17.9 (-25.8 to -9.6)               |
| Indonesia                                     | 1.7 (1.3 to 1.9)           | 1.0 (0.8 to 1.3)           | 0.9 (0.8 to 1.3)           | 0.9 (0.7 to 1.2)           | -0.7 (-1.5 to -0.0)                            | -10.1 (-19.6 to -0.3)               |
| Laos                                          | 6.5 (4.0 to 9.3)           | 3.4 (2.2 to 4.6)           | 3.2 (2.1 to 4.3)           | 2.6 (1.7 to 3.7)           | -1.6 (-2.3 to -0.9)                            | -21.3 (-29.7 to -12.9)              |
| Malaysia                                      | 2.2 (1.9 to 3.7)           | 1.9 (1.3 to 3.3)           | 1.8 (1.2 to 3.3)           | 1.4 (0.9 to 2.6)           | -2.0 (-3.1 to -0.7)                            | -25.2 (-37.5 to -10.3)              |
| Maldives                                      | 1.2 (0.7 to 1.4)           | 0.8 (0.4 to 1.0)           | 0.8 (0.4 to 0.9)           | 0.6 (0.3 to 0.9)           | -1.6 (-3.2 to 0.5)                             | -20.0 (-38.3 to 8.1)                |
| Mauritius                                     | 2.0 (1.9 to 2.1)           | 2.4 (2.2 to 2.6)           | 2.2 (2.0 to 2.5)           | 2.0 (1.7 to 2.3)           | -1.4 (-2.4 to -0.4)                            | -18.9 (-30.4 to -6.1)               |
| Myanmar                                       | 2.3 (1.7 to 2.8)           | 1.6 (1.0 to 2.1)           | 1.6 (1.0 to 2.1)           | 1.3 (0.8 to 1.7)           | -1.5 (-2.3 to -0.8)                            | -20.5 (-29.4 to -10.9)              |
| Philippines                                   | 20.0 (18.5 to 21.6)        | 15.9 (14.4 to 17.6)        | 15.7 (13.2 to 18.6)        | 14.1 (11.7 to 17.0)        | -0.8 (-2.0 to 0.2)                             | -11.7 (-26.0 to 3.3)                |
| Sri Lanka                                     | 6.3 (4.8 to 7.6)           | 3.4 (2.7 to 4.4)           | 3.3 (2.5 to 4.4)           | 2.6 (1.8 to 3.8)           | -1.7 (-3.4 to 0.2)                             | -21.8 (-40.3 to 2.6)                |
| Seychelles                                    | 7.6 (4.3 to 8.8)           | 5.4 (3.7 to 6.2)           | 5.3 (3.6 to 6.4)           | 4.4 (2.8 to 5.4)           | -1.5 (-2.5 to -0.4)                            | -19.3 (-31.0 to -5.2)               |
| Thailand                                      | 13.1 (7.1 to 15.5)         | 5.2 (3.6 to 6.3)           | 5.4 (3.6 to 6.7)           | 4.6 (3.0 to 6.7)           | -1.0 (-2.7 to 1.0)                             | -12.8 (-33.6 to 17.0)               |
| Timor-Leste                                   | 3.3 (1.4 to 4.4)           | 2.9 (1.2 to 3.8)           | 2.9 (1.3 to 3.9)           | 2.4 (1.1 to 3.3)           | -1.2 (-2.1 to -0.2)                            | -16.7 (-27.3 to -3.1)               |
| Vietnam                                       | 1.8 (1.4 to 2.3)           | 1.5 (1.0 to 1.9)           | 1.4 (0.9 to 1.9)           | 1.2 (0.8 to 1.7)           | -1.4 (-2.2 to -0.5)                            | -18.4 (-28.6 to -6.7)               |
| <b>Sub-Saharan Africa</b>                     |                            |                            |                            |                            |                                                |                                     |
| <b>Central Sub-Saharan Africa</b>             |                            |                            |                            |                            |                                                |                                     |
| Angola                                        | 5.4 (4.0 to 10.0)          | 3.7 (2.7 to 7.0)           | 3.5 (2.5 to 6.7)           | 3.2 (2.2 to 6.0)           | -1.1 (-2.0 to -0.1)                            | -15.1 (-26.0 to -1.6)               |
| Central African Republic                      | 8.7 (5.1 to 11.9)          | 14.5 (10.8 to 18.0)        | 8.1 (4.4 to 11.4)          | 7.7 (4.0 to 11.3)          | -4.4 (-6.8 to -2.7)                            | -47.6 (-63.7 to -33.8)              |
| Congo                                         | 7.4 (4.4 to 9.6)           | 5.4 (3.2 to 7.6)           | 5.3 (3.0 to 7.5)           | 4.7 (2.5 to 7.0)           | -1.0 (-2.4 to 0.6)                             | -12.8 (-30.3 to 10.2)               |
| Democratic Republic of the Congo              | 5.8 (4.9 to 6.8)           | 3.4 (2.4 to 4.3)           | 3.3 (2.3 to 4.2)           | 2.9 (1.9 to 3.8)           | -1.1 (-2.0 to -0.1)                            | -15.2 (-25.7 to -1.6)               |
| Equatorial Guinea                             | 5.6 (3.4 to 7.7)           | 3.5 (1.9 to 5.7)           | 3.6 (1.9 to 5.6)           | 2.9 (1.5 to 4.8)           | -1.3 (-2.6 to 0.1)                             | -17.5 (-31.9 to 1.9)                |
| Gabon                                         | 6.1 (3.5 to 9.4)           | 5.0 (2.9 to 7.5)           | 4.8 (2.7 to 7.0)           | 4.0 (2.2 to 6.2)           | -1.5 (-2.5 to -0.5)                            | -19.6 (-30.8 to -6.9)               |
| <b>Eastern Sub-Saharan Africa</b>             |                            |                            |                            |                            |                                                |                                     |
| Burundi                                       | 0.9 (0.5 to 1.1)           | 0.7 (0.3 to 1.0)           | 0.6 (0.3 to 1.0)           | 0.5 (0.3 to 0.8)           | -1.8 (-2.8 to -0.8)                            | -23.6 (-34.2 to -11.2)              |
| Comoros                                       | 9.8 (4.2 to 13.9)          | 8.6 (3.2 to 12.1)          | 8.4 (3.1 to 11.6)          | 7.2 (2.5 to 10.2)          | -1.2 (-2.0 to -0.3)                            | -16.4 (-26.4 to -5.1)               |
| Djibouti                                      | 10.6 (4.2 to 16.3)         | 8.7 (3.0 to 13.7)          | 8.4 (2.9 to 13.2)          | 7.4 (2.4 to 11.6)          | -1.1 (-2.2 to -0.2)                            | -15.6 (-28.2 to -3.5)               |
| Eritrea                                       | 16.6 (5.9 to 23.9)         | 13.9 (4.6 to 20.5)         | 13.3 (4.4 to 19.6)         | 12.2 (3.9 to 18.0)         | -0.9 (-1.9 to -0.1)                            | -12.9 (-24.9 to -1.6)               |
| Ethiopia                                      | 16.6 (13.5 to 20.1)        | 10.2 (8.7 to 13.4)         | 9.4 (8.0 to 12.3)          | 7.6 (6.2 to 10.1)          | -2.0 (-2.8 to -1.1)                            | -25.6 (-34.3 to -15.8)              |

|                                                                                            | Estimate in 2000 (95% UIs) | Estimate in 2015 (95% UIs) | Estimate in 2017 (95% UIs) | Estimate in 2020 (95% UIs) | Annualised rate of change, 2015-2020 (95% UIs) | Percent change, 2015-2020 (95% UIs) |
|--------------------------------------------------------------------------------------------|----------------------------|----------------------------|----------------------------|----------------------------|------------------------------------------------|-------------------------------------|
| Kenya                                                                                      | 15.0 (12.2 to 20.5)        | 12.2 (9.7 to 16.2)         | 11.5 (9.1 to 15.4)         | 10.8 (7.9 to 15.9)         | -0.9 (-2.1 to 0.6)                             | -12.2 (-26.6 to 9.0)                |
| Madagascar                                                                                 | 3.5 (0.8 to 4.5)           | 1.7 (0.7 to 2.4)           | 1.6 (0.7 to 2.3)           | 1.4 (0.6 to 2.0)           | -1.5 (-2.7 to -0.8)                            | -19.8 (-27.7 to -11.7)              |
| Malawi                                                                                     | 2.8 (1.6 to 8.2)           | 2.0 (1.2 to 5.0)           | 1.9 (1.1 to 5.9)           | 1.8 (0.9 to 5.5)           | -1.0 (-2.7 to 0.9)                             | -13.3 (-33.6 to 14.5)               |
| Mozambique                                                                                 | 5.8 (4.8 to 8.5)           | 7.9 (5.1 to 10.0)          | 7.5 (4.9 to 9.4)           | 6.8 (4.3 to 8.8)           | -1.1 (-2.1 to -0.1)                            | -14.5 (-27.2 to -1.5)               |
| Rwanda                                                                                     | 7.0 (5.3 to 8.3)           | 3.3 (2.4 to 4.3)           | 3.1 (2.2 to 4.2)           | 2.4 (1.5 to 3.6)           | -2.2 (-4.2 to 0.1)                             | -26.8 (-46.7 to 1.7)                |
| Somalia                                                                                    | 15.3 (8.1 to 20.2)         | 11.5 (4.1 to 17.1)         | 11.1 (3.8 to 16.6)         | 10.2 (3.3 to 15.7)         | -0.8 (-1.7 to -0.0)                            | -11.3 (-22.2 to -0.5)               |
| South Sudan                                                                                | 9.9 (3.8 to 15.1)          | 14.1 (7.1 to 19.9)         | 10.4 (3.5 to 15.9)         | 9.4 (3.0 to 15.3)          | -2.9 (-5.9 to -1.2)                            | -34.8 (-58.4 to -16.7)              |
| Tanzania                                                                                   | 7.4 (5.9 to 10.4)          | 6.3 (5.0 to 9.1)           | 6.2 (4.9 to 8.8)           | 5.3 (4.0 to 7.9)           | -1.2 (-2.1 to -0.3)                            | -16.2 (-27.0 to -4.9)               |
| Uganda                                                                                     | 9.1 (6.9 to 10.5)          | 4.6 (2.8 to 6.4)           | 4.4 (2.7 to 6.0)           | 4.1 (2.4 to 5.9)           | -0.9 (-2.3 to 0.4)                             | -12.1 (-28.9 to 6.5)                |
| Zambia                                                                                     | 9.3 (6.0 to 11.3)          | 6.5 (4.1 to 8.5)           | 6.3 (4.0 to 8.3)           | 5.5 (3.1 to 8.0)           | -1.2 (-3.4 to 0.8)                             | -15.1 (-39.6 to 12.1)               |
| <b>Southern Sub-Saharan Africa</b>                                                         |                            |                            |                            |                            |                                                |                                     |
| Botswana                                                                                   | 8.0 (2.8 to 11.9)          | 7.8 (2.2 to 10.3)          | 7.5 (2.2 to 9.9)           | 6.9 (1.9 to 10.7)          | -0.9 (-2.4 to 1.3)                             | -12.2 (-30.7 to 20.7)               |
| Lesotho                                                                                    | 43.0 (17.8 to 56.5)        | 42.8 (18.0 to 55.8)        | 39.5 (16.8 to 52.1)        | 40.6 (16.1 to 62.3)        | -0.5 (-2.6 to 1.8)                             | -5.2 (-32.5 to 30.9)                |
| Namibia                                                                                    | 27.5 (19.1 to 33.1)        | 15.2 (10.7 to 20.6)        | 14.8 (10.2 to 20.5)        | 11.8 (7.6 to 17.3)         | -1.7 (-3.0 to -0.4)                            | -22.5 (-36.5 to -5.3)               |
| South Africa                                                                               | 59.7 (42.3 to 64.4)        | 25.9 (19.9 to 30.0)        | 26.4 (20.3 to 30.2)        | 24.8 (16.5 to 39.1)        | -0.4 (-2.5 to 2.4)                             | -4.4 (-30.8 to 43.0)                |
| Swaziland                                                                                  | 29.9 (23.1 to 41.5)        | 25.8 (18.4 to 37.3)        | 23.3 (16.9 to 33.5)        | 22.7 (14.4 to 35.7)        | -0.9 (-3.0 to 1.4)                             | -12.1 (-36.1 to 24.0)               |
| Zimbabwe                                                                                   | 11.2 (8.2 to 13.6)         | 8.8 (6.4 to 11.9)          | 8.5 (6.4 to 11.4)          | 9.4 (4.9 to 11.4)          | 0.1 (-3.3 to 4.6)                              | 6.5 (-38.9 to 99.2)                 |
| <b>Western Sub-Saharan Africa</b>                                                          |                            |                            |                            |                            |                                                |                                     |
| Benin                                                                                      | 7.1 (4.1 to 9.0)           | 6.3 (3.3 to 8.5)           | 6.0 (3.1 to 8.1)           | 5.2 (2.5 to 7.2)           | -1.4 (-2.1 to -0.6)                            | -18.3 (-27.2 to -8.1)               |
| Burkina Faso                                                                               | 14.5 (11.9 to 20.3)        | 13.7 (11.0 to 17.5)        | 13.5 (10.8 to 17.5)        | 12.2 (9.6 to 15.5)         | -0.8 (-1.4 to -0.1)                            | -11.0 (-19.4 to -1.9)               |
| Cameroon                                                                                   | 4.2 (2.5 to 5.2)           | 3.0 (1.8 to 4.0)           | 2.8 (1.7 to 3.9)           | 2.6 (1.5 to 3.6)           | -1.0 (-1.9 to 0.2)                             | -13.1 (-25.3 to 3.5)                |
| Cote d'Ivoire                                                                              | 13.7 (11.6 to 17.9)        | 12.7 (10.3 to 15.8)        | 12.2 (9.7 to 15.3)         | 10.3 (8.1 to 12.9)         | -1.4 (-2.2 to -0.7)                            | -19.3 (-28.1 to -10.6)              |
| Chad                                                                                       | 8.6 (5.5 to 11.0)          | 7.4 (3.8 to 10.1)          | 7.3 (3.7 to 9.8)           | 6.2 (3.1 to 8.7)           | -1.2 (-2.0 to -0.2)                            | -15.7 (-25.4 to -2.9)               |
| Cote d'Ivoire                                                                              | 15.1 (11.4 to 19.1)        | 12.4 (9.3 to 16.0)         | 11.8 (8.9 to 15.4)         | 11.0 (8.0 to 14.5)         | -0.8 (-1.5 to -0.1)                            | -11.6 (-20.5 to -1.2)               |
| The Gambia                                                                                 | 1.5 (0.5 to 7.5)           | 1.4 (0.5 to 7.1)           | 1.4 (0.5 to 7.1)           | 1.4 (0.4 to 6.9)           | -0.4 (-1.2 to 0.3)                             | -6.1 (-16.9 to 4.9)                 |
| Ghana                                                                                      | 3.9 (2.4 to 10.6)          | 3.3 (1.9 to 9.7)           | 3.1 (1.8 to 9.4)           | 2.9 (1.6 to 8.4)           | -1.1 (-1.8 to -0.4)                            | -14.6 (-23.4 to -5.3)               |
| Guinea                                                                                     | 7.8 (4.8 to 10.0)          | 7.9 (4.1 to 10.1)          | 7.6 (3.9 to 9.9)           | 6.8 (3.3 to 9.2)           | -1.0 (-2.1 to 0.1)                             | -14.0 (-26.8 to 1.3)                |
| Guinea-Bissau                                                                              | 11.5 (7.7 to 14.5)         | 9.9 (6.1 to 12.9)          | 9.6 (5.9 to 12.7)          | 8.2 (5.1 to 10.9)          | -1.3 (-1.9 to -0.6)                            | -17.5 (-24.5 to -9.3)               |
| Liberia                                                                                    | 2.8 (1.6 to 3.6)           | 2.3 (1.2 to 2.9)           | 2.2 (1.2 to 2.9)           | 2.0 (1.1 to 2.6)           | -1.0 (-1.8 to -0.2)                            | -13.6 (-23.6 to -3.1)               |
| Mali                                                                                       | 6.7 (4.2 to 9.7)           | 6.7 (3.8 to 10.6)          | 6.0 (3.1 to 9.9)           | 4.8 (2.5 to 9.1)           | -2.3 (-3.1 to -1.5)                            | -28.6 (-37.3 to -20.5)              |
| Mauritania                                                                                 | 5.5 (3.3 to 7.3)           | 4.6 (2.3 to 6.6)           | 4.5 (2.4 to 6.5)           | 3.6 (1.8 to 5.3)           | -1.7 (-2.9 to -0.5)                            | -22.5 (-35.2 to -6.9)               |
| Niger                                                                                      | 7.4 (4.4 to 10.8)          | 6.3 (3.5 to 10.3)          | 6.3 (3.3 to 10.2)          | 5.4 (2.8 to 8.9)           | -1.2 (-1.9 to -0.5)                            | -16.2 (-24.5 to -7.0)               |
| Nigeria                                                                                    | 6.4 (4.5 to 8.2)           | 4.5 (2.7 to 6.3)           | 3.9 (2.1 to 5.7)           | 3.2 (1.7 to 4.7)           | -2.4 (-3.3 to -1.6)                            | -30.2 (-39.4 to -21.5)              |
| Sao Tome and Principe                                                                      | 6.2 (4.0 to 7.5)           | 5.5 (3.4 to 6.8)           | 5.2 (3.3 to 6.6)           | 4.8 (2.9 to 6.6)           | -0.9 (-2.0 to 0.6)                             | -12.0 (-26.1 to 9.3)                |
| Senegal                                                                                    | 1.2 (0.9 to 1.5)           | 1.1 (0.8 to 1.4)           | 1.1 (0.7 to 1.4)           | 0.9 (0.6 to 1.3)           | -1.0 (-1.9 to -0.1)                            | -14.1 (-24.6 to -1.0)               |
| Sierra Leone                                                                               | 1.6 (1.0 to 2.0)           | 1.4 (0.8 to 1.9)           | 1.4 (0.8 to 1.8)           | 1.2 (0.7 to 1.7)           | -1.1 (-2.0 to -0.1)                            | -14.8 (-25.5 to -1.1)               |
| Togo                                                                                       | 7.1 (4.2 to 8.9)           | 6.4 (3.3 to 8.9)           | 6.1 (3.2 to 8.1)           | 5.5 (2.6 to 7.7)           | -1.1 (-2.1 to 0.1)                             | -14.8 (-26.7 to 1.4)                |
| <b>Indicator 16.1.2: Death rate due to conflict and terrorism (per 100,000 population)</b> |                            |                            |                            |                            |                                                |                                     |
| <b>Central Europe, Eastern Europe, and Central Asia</b>                                    |                            |                            |                            |                            |                                                |                                     |
| <b>Central Asia</b>                                                                        |                            |                            |                            |                            |                                                |                                     |
| Armenia                                                                                    | 0.1 (0.1 to 0.1)           | 1.7 (1.6 to 1.8)           | 0.0 (0.0 to 0.0)           | 0.1 (0.0 to 0.8)           | -62.5 (-111.3 to -4.6)                         | -94.1 (-100.0 to -49.8)             |
| Azerbaijan                                                                                 | 0.2 (0.2 to 0.2)           | 0.0 (0.0 to 0.7)           | 0.0 (0.0 to 0.0)           | 0.1 (0.0 to 1.3)           | -64.0 (-104.7 to 4.6)                          | -83.1 (-100.0 to 98.3)              |
| Georgia                                                                                    | 0.5 (0.5 to 0.5)           | 0.1 (0.1 to 0.1)           | 0.0 (0.0 to 0.0)           | 0.5 (0.0 to 7.6)           | -44.6 (-89.4 to 31.7)                          | 637.9 (-100.0 to 11493.0)           |
| Kazakhstan                                                                                 | 0.0 (0.0 to 0.0)           | 0.1 (0.1 to 0.1)           | 0.0 (0.0 to 0.1)           | 0.0 (0.0 to 0.1)           | -65.5 (-89.7 to 4.8)                           | -75.5 (-100.0 to 104.4)             |
| Kyrgyzstan                                                                                 | 3.5 (3.4 to 3.6)           | 0.1 (0.1 to 0.1)           | 0.0 (0.0 to 0.0)           | 0.1 (0.0 to 2.2)           | -65.1 (-91.2 to 21.6)                          | 2.6 (-100.0 to 2453.5)              |
| Mongolia                                                                                   | 0.0 (0.0 to 0.0)           | 0.1 (0.1 to 0.1)           | 0.0 (0.0 to 0.1)           | 0.0 (0.0 to 0.1)           | -70.7 (-89.8 to 3.4)                           | -87.6 (-100.0 to 67.3)              |
| Tajikistan                                                                                 | 0.9 (0.9 to 0.9)           | 0.2 (0.2 to 0.2)           | 0.0 (0.0 to 0.0)           | 1.7 (0.0 to 31.9)          | -57.3 (-97.1 to 33.6)                          | 733.6 (-100.0 to 15245.7)           |
| Turkmenistan                                                                               | 0.1 (0.1 to 0.1)           | 0.1 (0.1 to 0.1)           | 0.0 (0.0 to 0.1)           | 0.0 (0.0 to 0.1)           | -65.2 (-89.7 to 2.4)                           | -80.6 (-100.0 to 43.8)              |
| Uzbekistan                                                                                 | 1.2 (1.2 to 1.2)           | 0.1 (0.1 to 0.1)           | 0.0 (0.0 to 0.0)           | 0.0 (0.0 to 0.2)           | -69.8 (-89.7 to 6.8)                           | -78.2 (-100.0 to 177.8)             |
| <b>Central Europe</b>                                                                      |                            |                            |                            |                            |                                                |                                     |
| Albania                                                                                    | 0.0 (0.0 to 0.0)           | 0.0 (0.0 to 0.0)           | 0.0 (0.0 to 0.0)           | 0.0 (0.0 to 0.5)           | 18.7 (0.0 to 102.1)                            | 29917301.7 (0.0 to 446243277.6)     |
| Bosnia and Herzegovina                                                                     | 0.0 (0.0 to 0.0)           | 0.1 (0.1 to 0.1)           | 0.0 (0.0 to 0.0)           | 3.7 (0.0 to 71.5)          | -72.1 (-93.1 to 42.9)                          | 3129.3 (-100.0 to 62414.7)          |
| Bulgaria                                                                                   | 0.1 (0.1 to 0.1)           | 0.0 (0.0 to 0.1)           | 0.0 (0.0 to 0.0)           | 10.3 (0.0 to 87.9)         | 10.3 (0.0 to 87.9)                             | 2798987.5 (0.0 to 52877555.7)       |
| Croatia                                                                                    | 0.2 (0.2 to 0.2)           | 0.0 (0.0 to 0.0)           | 0.0 (0.0 to 0.0)           | 1.1 (0.0 to 24.9)          | -43.8 (-83.1 to 45.7)                          | 4456.8 (-100.0 to 95267.9)          |
| Czech Republic                                                                             | 0.0 (0.0 to 0.0)           | 0.0 (0.0 to 0.0)           | 0.0 (0.0 to 0.0)           | 0.0 (0.0 to 0.0)           | 8.2 (0.0 to 79.3)                              | 1102064.8 (0.0 to 14704265.3)       |
| Hungary                                                                                    | 0.0 (0.0 to 0.0)           | 0.0 (0.0 to 0.0)           | 0.0 (0.0 to 0.0)           | 0.0 (0.0 to 0.1)           | 14.0 (0.0 to 89.3)                             | 3370402.0 (0.0 to 65543738.3)       |
| Macedonia                                                                                  | 0.3 (0.3 to 0.3)           | 0.0 (0.0 to 0.0)           | 0.0 (0.0 to 0.0)           | 0.1 (0.0 to 0.6)           | 20.1 (0.0 to 104.1)                            | 55580556.1 (0.0 to 606798000.0)     |
| Montenegro                                                                                 | 0.2 (0.1 to 0.2)           | 0.0 (0.0 to 0.0)           | 0.0 (0.0 to 0.0)           | 0.0 (0.0 to 0.1)           | 4.6 (0.0 to 91.7)                              | 4736120.7 (0.0 to 94744343.2)       |
| Poland                                                                                     | 0.0 (0.0 to 0.0)           | 0.0 (0.0 to 0.0)           | 0.0 (0.0 to 0.1)           | 0.0 (0.0 to 0.1)           | 19.0 (0.0 to 90.9)                             | 6699049.4 (0.0 to 83190446.2)       |
| Romania                                                                                    | 0.0 (0.0 to 0.0)           | 0.0 (0.0 to 0.0)           | 0.0 (0.0 to 0.0)           | 0.0 (0.0 to 0.0)           | -58.7 (-72.9 to -1.5)                          | 90.2 (-100.0 to -20.6)              |
| Serbia                                                                                     | 0.3 (0.3 to 0.3)           | 0.0 (0.0 to 0.0)           | 0.0 (0.0 to 0.0)           | 0.3 (0.0 to 9.1)           | 28.3 (0.0 to 121.7)                            | 237953234.5 (0.0 to 8923090053.7)   |
| Slovakia                                                                                   | 0.0 (0.0 to 0.0)           | 0.0 (0.0 to 0.0)           | 0.0 (0.0 to 0.0)           | 0.0 (0.0 to 0.0)           | 4.2 (0.0 to 76.7)                              | 543256.5 (0.0 to 9899415.8)         |
| Slovenia                                                                                   | 0.0 (0.0 to 0.0)           | 0.0 (0.0 to 0.0)           | 0.0 (0.0 to 0.0)           | 0.0 (0.0 to 0.1)           | 6.8 (0.0 to 88.8)                              | 3220352.1 (0.0 to 60791694.6)       |
| <b>Eastern Europe</b>                                                                      |                            |                            |                            |                            |                                                |                                     |
| Belarus                                                                                    | 0.0 (0.0 to 0.0)           | 0.0 (0.0 to 0.0)           | 0.0 (0.0 to 0.0)           | 0.0 (0.0 to 0.1)           | 14.5 (0.0 to 87.0)                             | 5852500.2 (0.0 to 4622143.6)        |
| Estonia                                                                                    | 0.0 (0.0 to 0.0)           | 0.0 (0.0 to 0.0)           | 0.0 (0.0 to 0.0)           | 0.0 (0.0 to 0.1)           | 9.6 (0.0 to 89.1)                              | 5287315.2 (0.0 to 63525975.5)       |
| Latvia                                                                                     | 0.0 (0.0 to 0.0)           | 0.0 (0.0 to 0.0)           | 0.0 (0.0 to 0.0)           | 0.0 (0.0 to 0.0)           | 9.9 (0.0 to 84.4)                              | 2867312.4 (0.0 to 31416063.9)       |
| Lithuania                                                                                  | 0.0 (0.0 to 0.0)           | 0.0 (0.0 to 0.0)           | 0.0 (0.0 to 0.1)           | 0.0 (0.0 to 0.1)           | 5.7 (0.0 to 87.2)                              | 2225515.4 (0.0 to 4737780.2)        |
| Moldova                                                                                    | 0.0 (0.0 to 0.0)           | 0.0 (0.0 to 0.0)           | 0.0 (0.0 to 0.0)           | 0.0 (0.0 to 0.0)           | 8.4 (0.0 to 82.3)                              | 1483907.1 (0.0 to 22944547.6)       |
| Russia                                                                                     | 4.5 (4.3 to 4.6)           | 0.2 (0.2 to 0.2)           | 0.1 (0.1 to 0.1)           | 0.3 (0.0 to 3.3)           | -43.4 (-96.9 to 18.5)                          | 41.5 (-100.0 to 1506.1)             |
| Ukraine                                                                                    | 0.0 (0.0 to 0.0)           | 5.1 (5.0 to 5.2)           | 1.1 (1.0 to 1.1)           | 0.1 (0.0 to 3.2)           | -105.1 (-118.4 to -3.2)                        | -98.0 (-100.0 to -37.7)             |
| <b>High-income</b>                                                                         |                            |                            |                            |                            |                                                |                                     |
| <b>Australasia</b>                                                                         |                            |                            |                            |                            |                                                |                                     |
| Australia                                                                                  | 0.0 (0.0 to 0.0)           | 0.0 (0.0 to 0.0)           | 0.0 (0.0 to 0.0)           | 0.1 (0.0 to 0.4)           | -22.1 (-78.6 to 22.4)                          | 436.2 (-100.0 to 2784.8)            |
| New Zealand                                                                                | 0.1 (0.1 to 0.1)           | 0.0 (0.0 to 0.0)           | 0.0 (0.0 to 0.0)           | 0.4 (0.0 to 5.3)           | -38.3 (-82.8 to 36.3)                          | 1694.5 (-100.0 to 23124.5)          |
| <b>High-income Asia Pacific</b>                                                            |                            |                            |                            |                            |                                                |                                     |
| Brunei                                                                                     | 0.0 (0.0 to 0.0)           | 0.0 (0.0 to 0.0)           | 0.0 (0.0 to 0.0)           | 0.0 (0.0 to 0.0)           | 20.7 (0.0 to 80.6)                             | 2824152.4 (0.0 to 17894550.7)       |
| Japan                                                                                      | 0.0 (0.0 to 0.0)           | 0.0 (0.0 to 0.0)           | 0.0 (0.0 to 0.0)           | 0.0 (0.0 to 0.0)           | -57.5 (-81.5 to -1.1)                          | -86.4 (-100.0 to -15.6)             |
| South Korea                                                                                | 0.0 (0.0 to 0.0)           | 0.0 (0.0 to 0.0)           | 0.0 (0.0 to 0.0)           | 11.6 (0.0 to 363.0)        | 40.2 (0.0 to 146.8)                            | 1156007008.9 (0.0 to 36299787032.7) |
| Singapore                                                                                  | 0.0 (0.0 to 0.0)           | 0.0 (0.0 to 0.0)           | 0.0 (0.0 to 0.0)           | 0.0 (0.0 to 0.1)           | 9.4 (0.0 to 93.4)                              | 8266703.3 (0.0 to 120791927.1)      |



|                                     | Estimate in 2000 (95% UIs) | Estimate in 2015 (95% UIs) | Estimate in 2017 (95% UIs) | Estimate in 2030 (95% UIs) | Annualised rate of change, 2015-2030 (95% UIs) | Percent change, 2015-2030 (95% UIs)   |
|-------------------------------------|----------------------------|----------------------------|----------------------------|----------------------------|------------------------------------------------|---------------------------------------|
| <b>High-income North America</b>    |                            |                            |                            |                            |                                                |                                       |
| Canada                              | 0.0 (0.0 to 0.0)           | 0.0 (0.0 to 0.0)           | 0.0 (0.0 to 0.0)           | 0.0 (0.0 to 0.2)           | 48.6 (0.0 to 98.0)                             | 37256043.5 (0.0 to 241486657.6)       |
| Greenland                           | 0.0 (0.0 to 0.0)           | 0.0 (0.0 to 0.0)           | 0.0 (0.0 to 0.0)           | 0.0 (0.0 to 0.0)           | 0.0 (0.0 to 0.0)                               | 0.0 (0.0 to 0.0)                      |
| United States                       | 0.0 (0.0 to 0.0)           | 0.0 (0.0 to 0.0)           | 0.0 (0.0 to 0.0)           | 0.4 (0.0 to 3.3)           | -8.3 (-81.8 to 33.6)                           | 1752.5 (-100.0 to 15416.7)            |
| <b>Southern Latin America</b>       |                            |                            |                            |                            |                                                |                                       |
| Argentina                           | 0.0 (0.0 to 0.0)           | 0.0 (0.0 to 0.0)           | 0.0 (0.0 to 0.0)           | 0.0 (0.0 to 0.3)           | 30.4 (0.0 to 98.6)                             | 1777238.6 (0.0 to 26541644.5)         |
| Chile                               | 0.0 (0.0 to 0.0)           | 0.0 (0.0 to 0.0)           | 0.0 (0.0 to 0.0)           | 0.0 (0.0 to 0.1)           | 24.1 (0.0 to 94.1)                             | 14676838.8 (0.0 to 135488030.0)       |
| Uruguay                             | 0.0 (0.0 to 0.0)           | 0.0 (0.0 to 0.0)           | 0.0 (0.0 to 0.0)           | 0.0 (0.0 to 0.0)           | 5.3 (0.0 to 80.9)                              | 1143862.1 (0.0 to 18657050.5)         |
| <b>Western Europe</b>               |                            |                            |                            |                            |                                                |                                       |
| Andorra                             | 0.0 (0.0 to 0.0)           | 0.0 (0.0 to 0.0)           | 0.0 (0.0 to 0.0)           | 0.0 (0.0 to 0.0)           | 0.0 (0.0 to 0.0)                               | 0.0 (0.0 to 0.0)                      |
| Austria                             | 0.0 (0.0 to 0.0)           | 0.0 (0.0 to 0.0)           | 0.0 (0.0 to 0.0)           | 0.0 (0.0 to 0.0)           | 12.1 (0.0 to 85.0)                             | 3418163.4 (0.0 to 34508147.9)         |
| Belgium                             | 0.0 (0.0 to 0.0)           | 0.0 (0.0 to 0.0)           | 0.0 (0.0 to 0.0)           | 0.0 (0.0 to 0.2)           | 45.7 (0.0 to 97.7)                             | 32552882.0 (0.0 to 232917363.4)       |
| Cyprus                              | 0.0 (0.0 to 0.0)           | 0.0 (0.0 to 0.0)           | 0.0 (0.0 to 0.0)           | 0.0 (0.0 to 11.4)          | 31.8 (0.0 to 123.7)                            | 915380749.7 (0.0 to 11363853616.6)    |
| Denmark                             | 0.0 (0.0 to 0.0)           | 0.0 (0.0 to 0.0)           | 0.0 (0.0 to 0.0)           | 0.0 (0.0 to 0.0)           | -69.6 (-85.7 to 1.0)                           | -85.1 (-100.0 to 16.9)                |
| Finland                             | 0.1 (0.0 to 0.1)           | 0.0 (0.0 to 0.0)           | 0.0 (0.0 to 0.0)           | 0.0 (0.0 to 0.3)           | 48.3 (0.0 to 98.7)                             | 39559904.5 (0.0 to 267629837.7)       |
| France                              | 0.0 (0.0 to 0.0)           | 0.5 (0.4 to 0.5)           | 0.0 (0.0 to 0.0)           | 0.1 (0.0 to 1.6)           | -21.8 (-102.2 to 8.4)                          | -76.6 (-100.0 to 253.3)               |
| Germany                             | 0.0 (0.0 to 0.0)           | 0.0 (0.0 to 0.0)           | 0.0 (0.0 to 0.0)           | 0.0 (0.0 to 0.0)           | -24.6 (-71.0 to 13.1)                          | 42.6 (-100.0 to 610.9)                |
| Greece                              | 0.0 (0.0 to 0.0)           | 0.0 (0.0 to 0.0)           | 0.0 (0.0 to 0.0)           | 0.1 (0.0 to 0.5)           | -25.0 (-76.8 to 26.0)                          | 506.2 (-100.0 to 4862.2)              |
| Iceland                             | 0.0 (0.0 to 0.0)           | 0.0 (0.0 to 0.0)           | 0.0 (0.0 to 0.0)           | 0.0 (0.0 to 0.0)           | 0.0 (0.0 to 0.0)                               | 0.0 (0.0 to 0.0)                      |
| Ireland                             | 0.0 (0.0 to 0.0)           | 0.0 (0.0 to 0.0)           | 0.0 (0.0 to 0.0)           | 0.0 (0.0 to 0.2)           | 51.3 (0.0 to 96.9)                             | 42139594.8 (0.0 to 205688716.5)       |
| Israel                              | 1.9 (1.8 to 1.9)           | 0.4 (0.4 to 0.4)           | 0.2 (0.2 to 0.3)           | 2.6 (0.0 to 29.1)          | -20.6 (-101.7 to 28.3)                         | 553.3 (-100.0 to 6887.6)              |
| Italy                               | 0.0 (0.0 to 0.0)           | 0.0 (0.0 to 0.0)           | 0.0 (0.0 to 0.0)           | 0.1 (0.0 to 0.5)           | 65.2 (0.0 to 102.5)                            | 50833970.8 (0.0 to 472714508.4)       |
| Luxembourg                          | 0.0 (0.0 to 0.0)           | 0.0 (0.0 to 0.0)           | 0.0 (0.0 to 0.0)           | 0.0 (0.0 to 0.3)           | 3.0 (0.0 to 99.6)                              | 9189473.1 (0.0 to 306518969.6)        |
| Malta                               | 0.0 (0.0 to 0.0)           | 0.0 (0.0 to 0.0)           | 0.0 (0.0 to 0.0)           | 0.0 (0.0 to 0.1)           | 5.5 (0.0 to 94.9)                              | 8456509.2 (0.0 to 152424880.8)        |
| Netherlands                         | 0.0 (0.0 to 0.0)           | 0.0 (0.0 to 0.0)           | 0.0 (0.0 to 0.0)           | 0.0 (0.0 to 0.6)           | 52.1 (0.0 to 104.2)                            | 41910254.8 (0.0 to 612699994.2)       |
| Norway                              | 0.0 (0.0 to 0.0)           | 0.0 (0.0 to 0.0)           | 0.0 (0.0 to 0.1)           | 0.0 (0.0 to 0.1)           | 14.9 (0.0 to 89.0)                             | 4080815.8 (0.0 to 62904756.5)         |
| Portugal                            | 0.0 (0.0 to 0.0)           | 0.0 (0.0 to 0.0)           | 0.0 (0.0 to 0.0)           | 0.0 (0.0 to 0.1)           | 31.0 (0.0 to 87.4)                             | 7066826.3 (0.0 to 49092843.7)         |
| Spain                               | 0.1 (0.1 to 0.1)           | 0.0 (0.0 to 0.0)           | 0.0 (0.0 to 0.0)           | 0.1 (0.0 to 0.8)           | 65.3 (0.0 to 106.1)                            | 108955679.1 (0.0 to 811920838.8)      |
| Sweden                              | 0.0 (0.0 to 0.0)           | 0.0 (0.0 to 0.0)           | 0.0 (0.0 to 0.0)           | 0.0 (0.0 to 0.0)           | -65.0 (-86.7 to -4.2)                          | -92.8 (-100.0 to -46.8)               |
| Switzerland                         | 0.0 (0.0 to 0.0)           | 0.0 (0.0 to 0.0)           | 0.0 (0.0 to 0.0)           | 0.0 (0.0 to 0.1)           | 17.0 (0.0 to 91.0)                             | 6218112.0 (0.0 to 849688569.8)        |
| United Kingdom                      | 0.0 (0.0 to 0.0)           | 0.0 (0.0 to 0.0)           | 0.0 (0.0 to 0.0)           | 0.1 (0.0 to 0.6)           | 12.8 (-71.4 to 32.9)                           | 2608.0 (-100.0 to 13898.5)            |
| <b>Latin America and Caribbean</b>  |                            |                            |                            |                            |                                                |                                       |
| <b>Andean Latin America</b>         |                            |                            |                            |                            |                                                |                                       |
| Bolivia                             | 0.0 (0.0 to 0.0)           | 0.0 (0.0 to 0.0)           | 0.0 (0.0 to 0.0)           | 0.0 (0.0 to 0.9)           | 18.9 (0.0 to 106.9)                            | 36779350.1 (0.0 to 921245863.8)       |
| Ecuador                             | 0.0 (0.0 to 0.0)           | 0.0 (0.0 to 0.0)           | 0.0 (0.0 to 0.1)           | 0.0 (0.0 to 0.1)           | 25.3 (0.0 to 90.4)                             | 6982881.3 (0.0 to 76977740.7)         |
| Peru                                | 0.0 (0.0 to 0.0)           | 0.1 (0.0 to 0.1)           | 0.0 (0.0 to 0.0)           | 1.0 (0.0 to 9.5)           | -27.2 (-87.3 to 35.0)                          | 1972.6 (-100.0 to 19033.6)            |
| <b>Caribbean</b>                    |                            |                            |                            |                            |                                                |                                       |
| Antigua and Barbuda                 | 0.0 (0.0 to 0.0)           | 0.0 (0.0 to 0.0)           | 0.0 (0.0 to 0.0)           | 0.0 (0.0 to 0.9)           | 2.9 (0.0 to 106.7)                             | 24170927.7 (0.0 to 895219542.5)       |
| The Bahamas                         | 0.0 (0.0 to 0.0)           | 0.0 (0.0 to 0.0)           | 0.0 (0.0 to 0.0)           | 0.0 (0.0 to 0.0)           | 0.0 (0.0 to 0.0)                               | 0.0 (0.0 to 0.0)                      |
| Barbados                            | 0.0 (0.0 to 0.0)           | 0.0 (0.0 to 0.0)           | 0.0 (0.0 to 0.0)           | 0.0 (0.0 to 0.8)           | 3.4 (0.0 to 105.6)                             | 24310100.1 (0.0 to 759690827.3)       |
| Belize                              | 5.4 (4.4 to 6.8)           | 0.0 (0.0 to 0.0)           | 0.0 (0.0 to 0.0)           | 0.2 (0.0 to 3.2)           | 11.0 (0.0 to 115.3)                            | 161310918.4 (0.0 to 3226259177.1)     |
| Bermuda                             | 0.0 (0.0 to 0.0)           | 0.0 (0.0 to 0.0)           | 0.0 (0.0 to 0.0)           | 0.0 (0.0 to 0.0)           | 0.0 (0.0 to 0.0)                               | 0.0 (0.0 to 0.0)                      |
| Cuba                                | 0.0 (0.0 to 0.0)           | 0.0 (0.0 to 0.0)           | 0.0 (0.0 to 0.0)           | 0.5 (0.0 to 8.8)           | 14.6 (0.0 to 121.9)                            | 457181041.2 (0.0 to 8781061119.4)     |
| Dominica                            | 0.0 (0.0 to 0.0)           | 0.0 (0.0 to 0.0)           | 0.1 (0.0 to 2.4)           | 0.0 (0.0 to 2.4)           | 9.8 (0.0 to 113.4)                             | 152129112.0 (0.0 to 242946398.1)      |
| Dominican Republic                  | 0.0 (0.0 to 0.0)           | 0.0 (0.0 to 0.0)           | 0.0 (0.0 to 0.0)           | 1.6 (0.0 to 57.7)          | 24.9 (0.0 to 134.5)                            | 1621191397.9 (0.0 to 5769683236.8)    |
| Grenada                             | 0.0 (0.0 to 0.0)           | 0.0 (0.0 to 0.0)           | 0.0 (0.0 to 0.0)           | 0.0 (0.0 to 0.0)           | 0.0 (0.0 to 0.0)                               | 0.0 (0.0 to 0.0)                      |
| Guyana                              | 0.0 (0.0 to 0.0)           | 0.0 (0.0 to 0.0)           | 0.0 (0.0 to 0.0)           | 0.0 (0.0 to 0.5)           | 13.3 (0.0 to 102.1)                            | 34950934.9 (0.0 to 447057871.4)       |
| Haiti                               | 0.1 (0.1 to 0.1)           | 0.0 (0.0 to 0.0)           | 0.0 (0.0 to 1.0)           | 0.1 (0.0 to 1.0)           | 32.0 (0.0 to 107.7)                            | 82865956.8 (0.0 to 1030651110.7)      |
| Jamaica                             | 0.0 (0.0 to 0.0)           | 0.0 (0.0 to 0.0)           | 0.0 (0.0 to 0.1)           | 0.0 (0.0 to 0.1)           | 11.4 (0.0 to 94.9)                             | 12676154.6 (0.0 to 152781570.7)       |
| Puerto Rico                         | 0.0 (0.0 to 0.0)           | 0.0 (0.0 to 0.0)           | 0.0 (0.0 to 0.0)           | 0.1 (0.0 to 1.6)           | 46.4 (0.0 to 110.6)                            | 128072952.7 (0.0 to 1593971796.9)     |
| Saint Lucia                         | 1.3 (1.1 to 1.6)           | 0.0 (0.0 to 0.0)           | 0.0 (0.0 to 0.0)           | 0.0 (0.0 to 0.0)           | 0.0 (0.0 to 0.0)                               | 0.0 (0.0 to 0.0)                      |
| Saint Vincent and the Grenadines    | 0.0 (0.0 to 0.0)           | 0.0 (0.0 to 0.0)           | 0.0 (0.0 to 0.0)           | 0.0 (0.0 to 0.0)           | 0.0 (0.0 to 0.0)                               | 0.0 (0.0 to 0.0)                      |
| Suriname                            | 0.0 (0.0 to 0.0)           | 0.0 (0.0 to 0.0)           | 0.0 (0.0 to 0.0)           | 0.1 (0.0 to 0.9)           | 7.0 (0.0 to 107.1)                             | 47865722.2 (0.0 to 952340505.6)       |
| Trinidad and Tobago                 | 0.0 (0.0 to 0.0)           | 0.0 (0.0 to 0.0)           | 0.0 (0.0 to 0.0)           | 0.0 (0.0 to 0.2)           | 6.4 (0.0 to 97.9)                              | 10917646.4 (0.0 to 238226040.7)       |
| Virgin Islands, U.S.                | 0.0 (0.0 to 0.0)           | 0.0 (0.0 to 0.0)           | 0.0 (0.0 to 0.0)           | 0.2 (0.0 to 3.2)           | 13.1 (0.0 to 115.2)                            | 217875696.1 (0.0 to 3180467281.8)     |
| <b>Central Latin America</b>        |                            |                            |                            |                            |                                                |                                       |
| Colombia                            | 5.4 (5.2 to 5.6)           | 0.5 (0.5 to 0.5)           | 0.0 (0.0 to 0.0)           | 0.9 (0.0 to 3.5)           | -13.0 (-103.0 to 12.7)                         | 78.6 (-100.0 to 576.5)                |
| Costa Rica                          | 0.0 (0.0 to 0.0)           | 0.0 (0.0 to 0.0)           | 0.0 (0.0 to 0.0)           | 0.0 (0.0 to 0.1)           | 12.3 (0.0 to 91.2)                             | 6707069.1 (0.0 to 87546679.5)         |
| El Salvador                         | 0.0 (0.0 to 0.0)           | 0.0 (0.0 to 0.0)           | 0.0 (0.0 to 0.0)           | 7.7 (0.0 to 75.3)          | 39.2 (0.0 to 136.3)                            | 7704669305.6 (0.0 to 75335545663.4)   |
| Guatemala                           | 0.1 (0.1 to 0.1)           | 0.0 (0.0 to 0.0)           | 0.0 (0.0 to 0.0)           | 3.5 (0.0 to 16.2)          | 71.0 (0.0 to 126.0)                            | 3551260720.4 (0.0 to 16165806432.0)   |
| Honduras                            | 0.0 (0.0 to 0.0)           | 0.0 (0.0 to 0.0)           | 0.0 (0.0 to 0.0)           | 1.3 (0.0 to 23.4)          | 39.9 (0.0 to 128.5)                            | 1313431472.4 (0.0 to 233487747.0)     |
| Mexico                              | 0.0 (0.0 to 0.0)           | 0.0 (0.0 to 0.0)           | 0.0 (0.0 to 0.0)           | 0.0 (0.0 to 0.1)           | 30.5 (0.0 to 94.1)                             | 12440511.3 (0.0 to 135796038.5)       |
| Nicaragua                           | 0.0 (0.0 to 0.1)           | 0.0 (0.0 to 0.0)           | 0.0 (0.0 to 0.0)           | 12.1 (0.0 to 139.7)        | 41.4 (0.0 to 140.4)                            | 12061502008.0 (0.0 to 139659317278.6) |
| Panama                              | 0.0 (0.0 to 0.0)           | 0.0 (0.0 to 0.0)           | 0.0 (0.0 to 0.0)           | 22.3 (0.0 to 105.3)        | 22.3 (0.0 to 105.3)                            | 39076078.0 (0.0 to 722774882.6)       |
| Venezuela                           | 0.1 (0.1 to 0.1)           | 0.0 (0.0 to 0.0)           | 0.0 (0.0 to 0.0)           | 0.1 (0.0 to 0.7)           | -10.6 (-69.9 to 35.7)                          | 2094.0 (-100.0 to 21048.7)            |
| <b>Tropical Latin America</b>       |                            |                            |                            |                            |                                                |                                       |
| Brazil                              | 0.0 (0.0 to 0.0)           | 0.0 (0.0 to 0.0)           | 0.0 (0.0 to 0.0)           | 0.0 (0.0 to 0.0)           | -31.2 (-65.1 to 14.3)                          | 38.4 (-100.0 to 758.3)                |
| Paraguay                            | 0.0 (0.0 to 0.0)           | 0.2 (0.1 to 0.3)           | 0.0 (0.0 to 0.0)           | 0.0 (0.0 to 0.2)           | -77.5 (-99.4 to -0.8)                          | -93.0 (-100.0 to -11.6)               |
| <b>North Africa and Middle East</b> |                            |                            |                            |                            |                                                |                                       |
| <b>North Africa and Middle East</b> |                            |                            |                            |                            |                                                |                                       |
| Afghanistan                         | 30.3 (29.2 to 31.4)        | 76.4 (72.0 to 81.2)        | 5.1 (4.0 to 6.4)           | 23.7 (0.0 to 193.9)        | -59.9 (-136.7 to 6.2)                          | -69.0 (-100.0 to 151.8)               |
| Algeria                             | 8.0 (7.3 to 8.9)           | 0.3 (0.3 to 0.3)           | 0.3 (0.3 to 0.4)           | 10.4 (0.0 to 87.6)         | -35.6 (-99.3 to 38.0)                          | 3508.8 (-100.0 to 29782.0)            |
| Bahrain                             | 0.0 (0.0 to 0.0)           | 0.3 (0.3 to 0.3)           | 0.8 (0.6 to 1.0)           | 0.1 (0.0 to 0.8)           | -85.0 (-102.1 to 5.0)                          | -85.6 (-100.0 to 112.5)               |
| Egypt                               | 0.0 (0.0 to 0.0)           | 0.2 (0.2 to 0.3)           | 1.2 (1.0 to 1.5)           | 0.5 (0.0 to 9.5)           | -32.4 (-98.8 to 23.4)                          | 116.9 (-100.0 to 3262.5)              |
| Iran                                | 0.2 (0.2 to 0.2)           | 0.1 (0.1 to 0.1)           | 0.1 (0.1 to 0.1)           | 3.8 (0.0 to 42.7)          | -22.2 (-92.3 to 40.5)                          | 3845.1 (-100.0 to 43296.0)            |
| Iraq                                | 1.3 (1.0 to 1.6)           | 64.3 (52.3 to 80.8)        | 76.8 (61.6 to 95.9)        | 21.3 (0.0 to 186.9)        | -41.4 (-136.1 to 6.7)                          | -66.2 (-100.0 to 173.5)               |
| Jordan                              | 0.0 (0.0 to 0.0)           | 0.1 (0.1 to 0.1)           | 0.3 (0.3 to 0.4)           | 0.1 (0.0 to 0.9)           | -65.0 (-91.9 to 16.0)                          | -37.9 (-100.0 to 1008.9)              |
| Kuwait                              | 0.3 (0.2 to 0.6)           | 1.4 (1.2 to 1.5)           | 0.0 (0.0 to 0.0)           | 0.5 (0.0 to 12.2)          | -63.9 (-110.2 to 14.1)                         | -67.5 (-100.0 to 725.7)               |
| Lebanon                             | 0.7 (0.7 to 0.8)           | 2.3 (1.9 to 2.7)           | 4.5 (3.6 to 5.7)           | 16.5 (0.0 to 373.7)        | -39.4 (-113.8 to 33.0)                         | 624.5 (-100.0 to 13998.0)             |
| Libya                               | 0.0 (0.0 to 0.1)           | 0.8 (0.6 to 0.9)           | 22.1 (17.7 to 27.2)        | 3.7 (0.0 to 56.2)          | -79.0 (-107.0 to 28.3)                         | 401.3 (-100.0 to 6909.3)              |

|                                               | Estimate in 2000 (95% UIs) | Estimate in 2015 (95% UIs) | Estimate in 2017 (95% UIs) | Estimate in 2020 (95% UIs) | Annualised rate of change, 2015-2020 (95% UIs) | Percent change, 2015-2020 (95% UIs)    |
|-----------------------------------------------|----------------------------|----------------------------|----------------------------|----------------------------|------------------------------------------------|----------------------------------------|
| Morocco                                       | 0.0 (0.0 to 0.0)           | 0.0 (0.0 to 0.0)           | 0.0 (0.0 to 0.0)           | 0.0 (0.0 to 3.1)           | -19.9 (-74.2 to 41.9)                          | 8815.7 (-100.0 to 53417.9)             |
| Palestine                                     | 76.7 (61.4 to 96.3)        | 57.4 (7 to 7.6)            | 2.6 (2.1 to 3.3)           | 43.1 (0.0 to 704.6)        | -34.9 (-120.4 to 31.4)                         | 640.6 (-100.0 to 11089.0)              |
| Oman                                          | 0.0 (0.0 to 0.0)           | 0.0 (0.0 to 0.0)           | 0.0 (0.0 to 0.0)           | 0.6 (0.0 to 10.4)          | 9.4 (0.0 to 123.1)                             | 550786849.6 (0.0 to 1037948663.3)      |
| Qatar                                         | 0.0 (0.0 to 0.0)           | 0.0 (0.0 to 0.0)           | 0.0 (0.0 to 0.0)           | 6.0 (0.0 to 94.5)          | 6.0 (0.0 to 94.5)                              | 7868017.3 (0.0 to 142503669.4)         |
| Saudi Arabia                                  | 0.0 (0.0 to 0.0)           | 1.0 (0.8 to 1.1)           | 7.5 (6.0 to 9.6)           | 0.0 (0.0 to 0.3)           | -76.8 (-108.3 to -8.0)                         | -97.4 (-100.0 to -69.7)                |
| Sudan                                         | 12.3 (12.2 to 12.4)        | 0.0 (0.0 to 0.0)           | 3.4 (2.7 to 4.2)           | 3.0 (0.0 to 9.4)           | 79.9 (0.0 to 122.4)                            | 297255772.8 (0.0 to 9399411067.0)      |
| Syria                                         | 0.0 (0.0 to 0.1)           | 304.5 (249.8 to 375.7)     | 228.2 (185.8 to 284.5)     | 11.2 (0.0 to 133.1)        | -91.9 (-146.8 to -5.5)                         | -96.3 (-100.0 to -56.5)                |
| Tunisia                                       | 0.1 (0.0 to 0.1)           | 0.9 (0.8 to 0.9)           | 0.2 (0.2 to 0.3)           | 0.3 (0.0 to 4.8)           | -76.4 (-107.0 to 11.2)                         | -62.8 (-100.0 to 433.8)                |
| Turkey                                        | 0.2 (0.2 to 0.2)           | 2.0 (1.9 to 2.1)           | 3.7 (3.0 to 4.6)           | 0.3 (0.0 to 1.8)           | -43.6 (-112.2 to -0.4)                         | -84.8 (-100.0 to -5.9)                 |
| United Arab Emirates                          | 0.0 (0.0 to 0.0)           | 0.0 (0.0 to 0.0)           | 0.0 (0.0 to 0.0)           | 0.0 (0.0 to 0.3)           | 11.3 (0.0 to 99.1)                             | 14948049.9 (0.0 to 286638147.3)        |
| Yemen                                         | 0.1 (0.1 to 0.1)           | 31.5 (29.9 to 33.1)        | 55.2 (44.2 to 68.3)        | 7.1 (0.0 to 41.3)          | -62.8 (-130.7 to 1.8)                          | -77.4 (-100.0 to 31.1)                 |
| <b>South Asia</b>                             |                            |                            |                            |                            |                                                |                                        |
| Bangladesh                                    | 0.0 (0.0 to 0.0)           | 0.1 (0.1 to 0.1)           | 0.1 (0.1 to 0.1)           | 0.0 (0.0 to 0.1)           | -48.2 (-89.6 to 1.7)                           | -85.8 (-100.0 to 28.3)                 |
| Bhutan                                        | 0.0 (0.0 to 0.0)           | 0.0 (0.0 to 0.0)           | 0.0 (0.0 to 0.0)           | 0.0 (0.0 to 0.2)           | 4.7 (0.0 to 97.8)                              | 10590752.5 (0.0 to 235162619.2)        |
| India                                         | 0.5 (0.5 to 0.5)           | 0.1 (0.1 to 0.1)           | 0.1 (0.1 to 0.1)           | 0.1 (0.0 to 0.2)           | -33.2 (-92.5 to 5.9)                           | -51.5 (-100.0 to 142.0)                |
| Nepal                                         | 1.9 (1.9 to 1.9)           | 0.0 (0.0 to 0.0)           | 0.0 (0.0 to 0.0)           | 0.4 (0.0 to 6.2)           | -27.2 (-69.9 to 49.7)                          | 10343.8 (-100.0 to 173079.8)           |
| Pakistan                                      | 0.1 (0.1 to 0.1)           | 1.9 (1.8 to 1.9)           | 0.2 (0.2 to 0.2)           | 0.2 (0.0 to 1.6)           | -47.5 (-111.7 to -1.3)                         | -86.7 (-100.0 to -18.2)                |
| <b>Southeast Asia, East Asia, and Oceania</b> |                            |                            |                            |                            |                                                |                                        |
| <b>East Asia</b>                              |                            |                            |                            |                            |                                                |                                        |
| China                                         | 0.0 (0.0 to 0.0)           | 0.0 (0.0 to 0.0)           | 0.0 (0.0 to 0.0)           | 0.1 (0.0 to 1.6)           | -30.9 (-83.1 to 27.4)                          | 376.5 (-100.0 to 6018.3)               |
| North Korea                                   | 0.0 (0.0 to 0.0)           | 0.0 (0.0 to 0.0)           | 0.0 (0.0 to 0.0)           | 42.8 (0.0 to 1354.6)       | 10.0 (0.0 to 155.5)                            | 42792279176.3 (0.0 to 1354604211020.1) |
| Taiwan (Province of China)                    | 0.0 (0.0 to 0.0)           | 0.0 (0.0 to 0.0)           | 0.0 (0.0 to 0.0)           | 0.0 (0.0 to 0.1)           | 18.8 (0.0 to 91.6)                             | 10033426.2 (0.0 to 93347192.1)         |
| <b>Oceania</b>                                |                            |                            |                            |                            |                                                |                                        |
| American Samoa                                | 0.0 (0.0 to 0.0)           | 0.0 (0.0 to 0.0)           | 0.0 (0.0 to 0.0)           | 0.3 (0.0 to 2.4)           | 15.4 (0.0 to 113.4)                            | 258801963.2 (0.0 to 2442762084.8)      |
| Federated States of Micronesia                | 0.0 (0.0 to 0.0)           | 0.0 (0.0 to 0.0)           | 0.0 (0.0 to 0.0)           | 0.0 (0.0 to 0.0)           | 0.0 (0.0 to 0.0)                               | 0.0 (0.0 to 0.0)                       |
| Fiji                                          | 0.9 (0.8 to 0.9)           | 0.0 (0.0 to 0.0)           | 0.0 (0.0 to 0.0)           | 0.0 (0.0 to 0.1)           | 3.2 (0.0 to 90.0)                              | 2629269.6 (0.0 to 7305256.8)           |
| Guam                                          | 0.0 (0.0 to 0.0)           | 0.0 (0.0 to 0.0)           | 0.0 (0.0 to 0.0)           | 0.7 (0.0 to 9.8)           | 25.7 (0.0 to 122.7)                            | 715482672.3 (0.0 to 9826322599.7)      |
| Kiribati                                      | 0.0 (0.0 to 0.0)           | 0.0 (0.0 to 0.0)           | 0.0 (0.0 to 0.0)           | 0.0 (0.0 to 0.0)           | 0.0 (0.0 to 0.0)                               | 0.0 (0.0 to 0.0)                       |
| Marshall Islands                              | 0.0 (0.0 to 0.0)           | 0.0 (0.0 to 0.0)           | 0.0 (0.0 to 0.0)           | 0.0 (0.0 to 0.0)           | 0.0 (0.0 to 0.0)                               | 0.0 (0.0 to 0.0)                       |
| Northern Mariana Islands                      | 0.0 (0.0 to 0.0)           | 0.0 (0.0 to 0.0)           | 0.0 (0.0 to 0.0)           | 0.1 (0.0 to 2.2)           | 5.8 (0.0 to 112.8)                             | 102654379.1 (0.0 to 2213815816.7)      |
| Papua New Guinea                              | 0.0 (0.0 to 0.0)           | 0.0 (0.0 to 0.0)           | 0.0 (0.0 to 0.0)           | 0.1 (0.0 to 0.9)           | 14.7 (0.0 to 106.9)                            | 27651235.6 (0.0 to 91574206.3)         |
| Samoa                                         | 0.0 (0.0 to 0.0)           | 0.0 (0.0 to 0.0)           | 0.0 (0.0 to 0.0)           | 0.0 (0.0 to 0.0)           | 0.0 (0.0 to 0.0)                               | 0.0 (0.0 to 0.0)                       |
| Solomon Islands                               | 6.1 (5.9 to 6.2)           | 0.0 (0.0 to 0.0)           | 0.0 (0.0 to 0.0)           | 0.1 (0.0 to 1.7)           | 11.6 (0.0 to 111.1)                            | 66074791.4 (0.0 to 1715211952.6)       |
| Tonga                                         | 0.0 (0.0 to 0.0)           | 0.0 (0.0 to 0.0)           | 0.0 (0.0 to 0.0)           | 0.0 (0.0 to 0.0)           | 0.0 (0.0 to 0.0)                               | 0.0 (0.0 to 0.0)                       |
| Vanuatua                                      | 0.0 (0.0 to 0.0)           | 0.0 (0.0 to 0.0)           | 0.0 (0.0 to 0.0)           | 0.0 (0.0 to 0.0)           | 0.0 (0.0 to 0.0)                               | 0.0 (0.0 to 0.0)                       |
| <b>Southeast Asia</b>                         |                            |                            |                            |                            |                                                |                                        |
| Cambodia                                      | 0.1 (0.1 to 0.1)           | 0.0 (0.0 to 0.0)           | 0.0 (0.0 to 0.0)           | 82.2 (0.0 to 960.3)        | -8.5 (-85.2 to 68.9)                           | 257797.9 (-100.0 to 3060396.7)         |
| Indonesia                                     | 0.3 (0.3 to 0.3)           | 0.2 (0.2 to 0.2)           | 0.4 (0.0 to 2.4)           | 0.4 (0.0 to 2.4)           | -23.5 (-96.4 to 17.2)                          | 139.8 (-100.0 to 1222.5)               |
| Laos                                          | 0.1 (0.1 to 0.1)           | 0.1 (0.1 to 0.1)           | 0.0 (0.0 to 0.0)           | 5.8 (0.0 to 30.5)          | -30.3 (-89.4 to 42.0)                          | 9760.1 (-100.0 to 54247.0)             |
| Malaysia                                      | 0.0 (0.0 to 0.0)           | 0.0 (0.0 to 0.0)           | 0.0 (0.0 to 0.0)           | 1.0 (0.0 to 11.3)          | -29.0 (-70.4 to 54.0)                          | 29358.1 (-100.0 to 328178.3)           |
| Maldives                                      | 0.0 (0.0 to 0.0)           | 0.0 (0.0 to 0.0)           | 0.0 (0.0 to 0.0)           | 0.0 (0.0 to 0.0)           | 0.0 (0.0 to 0.0)                               | 0.0 (0.0 to 0.0)                       |
| Mauritius                                     | 0.0 (0.0 to 0.0)           | 0.0 (0.0 to 0.0)           | 0.0 (0.0 to 0.0)           | 0.0 (0.0 to 0.0)           | 0.0 (0.0 to 0.0)                               | 0.0 (0.0 to 0.0)                       |
| Myanmar                                       | 1.4 (1.4 to 1.5)           | 1.5 (1.3 to 1.7)           | 0.1 (0.1 to 0.1)           | 5.1 (0.1 to 21.5)          | 1.1 (-17.7 to 17.6)                            | 248.4 (-92.9 to 1306.0)                |
| Philippines                                   | 2.6 (2.5 to 2.6)           | 1.0 (1.0 to 1.1)           | 1.1 (0.9 to 1.3)           | 0.5 (0.0 to 2.5)           | -22.9 (-108.0 to 5.9)                          | -51.3 (-100.0 to 143.0)                |
| Sri Lanka                                     | 16.1 (15.3 to 16.8)        | 0.0 (0.0 to 0.0)           | 0.0 (0.0 to 0.0)           | 3.1 (0.0 to 17.5)          | -18.3 (-79.8 to 47.4)                          | 21948.2 (-100.0 to 122286.7)           |
| Seychelles                                    | 0.0 (0.0 to 0.0)           | 0.0 (0.0 to 0.0)           | 0.0 (0.0 to 0.0)           | 0.0 (0.0 to 0.0)           | 18.2 (0.0 to 82.6)                             | 3382767.7 (0.0 to 2390272.5)           |
| Thailand                                      | 0.0 (0.0 to 0.0)           | 0.2 (0.2 to 0.2)           | 0.1 (0.0 to 1.1)           | 0.1 (0.0 to 1.1)           | -22.6 (-95.6 to 12.7)                          | 25.9 (-100.0 to 570.2)                 |
| Timor-Leste                                   | 8.9 (7.7 to 10.2)          | 0.0 (0.0 to 0.0)           | 0.0 (0.0 to 0.0)           | 15.9 (0.0 to 122.5)        | 63.9 (0.0 to 139.5)                            | 1594336797.2 (0.0 to 122540254017.3)   |
| Vietnam                                       | 0.0 (0.0 to 0.0)           | 0.0 (0.0 to 0.0)           | 0.0 (0.0 to 0.0)           | 21.2 (0.0 to 161.8)        | 46.5 (0.0 to 141.4)                            | 2122442394.8 (0.0 to 161665347909.9)   |
| <b>Sub-Saharan Africa</b>                     |                            |                            |                            |                            |                                                |                                        |
| <b>Central Sub-Saharan Africa</b>             |                            |                            |                            |                            |                                                |                                        |
| Angola                                        | 23.0 (21.1 to 25.1)        | 0.0 (0.0 to 0.0)           | 0.2 (0.2 to 0.2)           | 8.8 (0.0 to 22.0)          | 23.7 (-71.0 to 58.3)                           | 233310.4 (-100.0 to 628946.3)          |
| Central African Republic                      | 0.4 (0.4 to 0.4)           | 10.2 (9.5 to 10.9)         | 40.6 (36.3 to 45.8)        | 1.8 (0.0 to 41.1)          | -78.7 (-123.3 to 9.1)                          | -82.0 (-100.0 to 291.9)                |
| Congo                                         | 15.8 (14.1 to 17.8)        | 0.0 (0.0 to 0.0)           | 0.5 (0.5 to 0.6)           | 1.8 (0.0 to 48.1)          | 36.6 (0.0 to 133.3)                            | 1772919606.2 (0.0 to 48068766576.4)    |
| Democratic Republic of the Congo              | 5.6 (5.2 to 6.0)           | 1.5 (1.4 to 1.6)           | 3.5 (3.1 to 3.9)           | 1.5 (0.0 to 22.0)          | -50.3 (-110.5 to 17.7)                         | -1.9 (-100.0 to 1319.1)                |
| Equatorial Guinea                             | 0.0 (0.0 to 0.0)           | 0.0 (0.0 to 0.0)           | 0.0 (0.0 to 0.0)           | 0.0 (0.0 to 0.4)           | 11.1 (0.0 to 102.0)                            | 21692000.6 (0.0 to 440111811.8)        |
| Gabon                                         | 0.0 (0.0 to 0.0)           | 0.1 (0.1 to 0.1)           | 0.0 (0.0 to 0.0)           | 0.0 (0.0 to 0.3)           | -82.1 (-89.5 to 10.3)                          | -80.4 (-100.0 to 367.0)                |
| <b>Eastern Sub-Saharan Africa</b>             |                            |                            |                            |                            |                                                |                                        |
| Burundi                                       | 225.7 (193.8 to 264.2)     | 6.4 (5.7 to 7.2)           | 2.2 (1.9 to 2.6)           | 11.1 (0.0 to 248.8)        | -65.0 (-120.5 to 24.0)                         | 72.7 (-100.0 to 3533.6)                |
| Comoros                                       | 0.0 (0.0 to 0.0)           | 0.0 (0.0 to 0.0)           | 0.0 (0.0 to 0.0)           | 0.1 (0.0 to 2.9)           | 4.5 (0.0 to 114.5)                             | 79339484.2 (0.0 to 2886451156.0)       |
| Dibouti                                       | 0.0 (0.0 to 0.0)           | 2.6 (2.2 to 3.0)           | 0.1 (0.1 to 0.1)           | 0.4 (0.0 to 4.6)           | -83.2 (-114.8 to 3.6)                          | -83.2 (-100.0 to 72.5)                 |
| Eritrea                                       | 51.8 (51.2 to 52.3)        | 2.0 (1.0 to 0.2)           | 0.0 (0.0 to 0.0)           | 61.3 (0.0 to 251.0)        | -5.1 (-96.6 to 47.9)                           | 34496.0 (-100.0 to 131436.4)           |
| Ethiopia                                      | 74.8 (74.3 to 75.3)        | 0.4 (0.4 to 0.4)           | 1.0 (0.9 to 1.2)           | 1.0 (0.9 to 1.2)           | -33.2 (-101.7 to 20.6)                         | 99.3 (-100.0 to 2098.4)                |
| Kenya                                         | 1.4 (1.3 to 1.5)           | 1.4 (1.3 to 1.5)           | 0.8 (0.8 to 0.9)           | 1.5 (0.0 to 19.9)          | -55.7 (-110.0 to 17.6)                         | 7.2 (-100.0 to 1306.8)                 |
| Madagascar                                    | 0.0 (0.0 to 0.0)           | 0.7 (0.6 to 0.8)           | 0.7 (0.6 to 0.8)           | 0.0 (0.0 to 0.3)           | -82.2 (-105.9 to -5.2)                         | -96.4 (-100.0 to -54.1)                |
| Malawi                                        | 0.0 (0.0 to 0.0)           | 0.1 (0.1 to 0.1)           | 0.1 (0.1 to 0.1)           | 0.0 (0.0 to 0.1)           | -77.5 (-91.0 to -3.4)                          | -96.6 (-100.0 to -40.1)                |
| Mozambique                                    | 0.0 (0.0 to 0.0)           | 0.0 (0.0 to 0.0)           | 0.6 (0.5 to 0.7)           | 3.8 (0.0 to 37.5)          | -18.9 (-79.3 to 52.5)                          | 26699.1 (-100.0 to 262725.4)           |
| Rwanda                                        | 24.8 (21.4 to 29.3)        | 0.0 (0.0 to 0.0)           | 0.0 (0.0 to 0.0)           | 2.1 (0.0 to 26.3)          | -38.7 (-83.8 to 46.0)                          | 8253.1 (-100.0 to 99759.6)             |
| Somalia                                       | 0.3 (0.3 to 0.4)           | 10.6 (9.5 to 11.7)         | 32.3 (27.2 to 37.9)        | 2.2 (0.0 to 32.6)          | -57.8 (-123.7 to 6.9)                          | -79.1 (-100.0 to 186.1)                |
| South Sudan                                   | 27.9 (23.7 to 32.9)        | 1.1 (0.9 to 1.2)           | 42.5 (35.9 to 50.3)        | 2.2 (0.0 to 19.5)          | -56.1 (-108.7 to 19.0)                         | 113.4 (-100.0 to 1629.1)               |
| Tanzania                                      | 0.1 (0.1 to 0.1)           | 0.1 (0.1 to 0.1)           | 0.1 (0.1 to 0.1)           | 0.0 (0.0 to 0.2)           | -57.8 (-89.5 to 7.0)                           | -76.7 (-100.0 to 187.6)                |
| Uganda                                        | 6.2 (5.6 to 6.9)           | 0.1 (0.1 to 0.1)           | 0.1 (0.1 to 0.1)           | 3.3 (0.0 to 29.7)          | -24.9 (-89.2 to 41.8)                          | 5800.3 (-100.0 to 52540.7)             |
| Zambia                                        | 0.0 (0.0 to 0.0)           | 0.0 (0.0 to 0.1)           | 0.0 (0.0 to 0.0)           | 0.0 (0.0 to 0.2)           | -56.2 (-87.4 to 10.6)                          | -67.5 (-100.0 to 386.9)                |
| <b>Southern Sub-Saharan Africa</b>            |                            |                            |                            |                            |                                                |                                        |
| Botswana                                      | 0.0 (0.0 to 0.0)           | 0.0 (0.0 to 0.0)           | 0.0 (0.0 to 0.0)           | 0.0 (0.0 to 0.1)           | 5.7 (0.0 to 93.0)                              | 5442827.7 (0.0 to 114892660.3)         |
| Lesotho                                       | 0.0 (0.0 to 0.0)           | 0.2 (0.1 to 0.2)           | 0.2 (0.2 to 0.2)           | 0.0 (0.0 to 0.1)           | -75.3 (-95.9 to 5.0)                           | -80.5 (-100.0 to 113.0)                |
| Namibia                                       | 8.5 (7.9 to 9.1)           | 0.1 (0.1 to 0.1)           | 0.0 (0.0 to 0.1)           | 10.9 (0.0 to 42.8)         | -34.5 (-94.6 to 38.6)                          | 8227.1 (-100.0 to 32440.2)             |
| South Africa                                  | 0.1 (0.1 to 0.1)           | 0.3 (0.2 to 0.3)           | 0.1 (0.1 to 0.1)           | 0.1 (0.1 to 0.1)           | -42.4 (-98.9 to 6.0)                           | -69.0 (-100.0 to 146.7)                |
| Swaziland                                     | 0.0 (0.0 to 0.0)           | 0.0 (0.0 to 0.0)           | 0.0 (0.0 to 0.0)           | 0.0 (0.0 to 0.1)           | 8.0 (0.0 to 94.5)                              | 9561031.5 (0.0 to 143990675.4)         |

|                                                                                                                                 | Estimate in 2000 (95% UIs) | Estimate in 2015 (95% UIs) | Estimate in 2017 (95% UIs) | Estimate in 2020 (95% UIs) | Annualised rate of change, 2015-2020 (95% UIs) | Percent change, 2015-2020 (95% UIs)  |
|---------------------------------------------------------------------------------------------------------------------------------|----------------------------|----------------------------|----------------------------|----------------------------|------------------------------------------------|--------------------------------------|
| Zimbabwe                                                                                                                        | 0.2 (0.2 to 0.3)           | 0.1 (0.1 to 0.1)           | 0.0 (0.0 to 0.0)           | 3.0 (0.0 to 76.1)          | -35.2 (-91.7 to 45.1)                          | 4242.3 (-100.0 to 8715.5)            |
| <b>Western Sub-Saharan Africa</b>                                                                                               |                            |                            |                            |                            |                                                |                                      |
| Benin                                                                                                                           | 0.0 (0.0 to 0.0)           | 0.0 (0.0 to 0.0)           | 0.1 (0.1 to 0.1)           | 0.0 (0.0 to 0.0)           | -77.9 (-84.5 to -4.2)                          | -97.2 (-100.0 to -46.8)              |
| Burkina Faso                                                                                                                    | 0.0 (0.0 to 0.0)           | 0.1 (0.1 to 0.1)           | 0.5 (0.4 to 0.6)           | 0.0 (0.0 to 0.1)           | -78.6 (-94.6 to -1.7)                          | -95.3 (-100.0 to -22.8)              |
| Cameroon                                                                                                                        | 0.1 (0.1 to 0.1)           | 6.0 (5.8 to 6.4)           | 1.6 (1.4 to 1.9)           | 0.1 (0.0 to 1.8)           | -87.2 (-119.8 to -8.3)                         | -98.2 (-100.0 to -71.1)              |
| Cape Verde                                                                                                                      | 0.0 (0.0 to 0.0)           | 0.0 (0.0 to 0.0)           | 0.0 (0.0 to 0.0)           | 0.0 (0.0 to 0.0)           | 0.0 (0.0 to 0.0)                               | 0.0 (0.0 to 0.0)                     |
| Chad                                                                                                                            | 12.2 (12.2 to 12.2)        | 3.7 (3.6 to 3.9)           | 1.9 (1.7 to 2.3)           | 1.9 (0.0 to 7.2)           | -42.4 (-116.4 to 4.3)                          | -49.3 (-100.0 to 90.9)               |
| Cote d'Ivoire                                                                                                                   | 0.7 (0.6 to 0.7)           | 0.1 (0.1 to 0.1)           | 0.1 (0.1 to 0.1)           | 0.2 (0.0 to 2.5)           | -51.6 (-90.0 to 23.8)                          | 170.2 (-100.0 to 3430.3)             |
| The Gambia                                                                                                                      | 0.1 (0.1 to 0.2)           | 0.0 (0.0 to 0.0)           | 0.1 (0.1 to 0.2)           | 0.0 (0.0 to 0.5)           | 13.4 (0.0 to 102.8)                            | 24351148.9 (0.0 to 494990161.9)      |
| Ghana                                                                                                                           | 0.2 (0.1 to 0.2)           | 0.1 (0.1 to 0.1)           | 0.2 (0.1 to 0.2)           | 0.0 (0.0 to 0.1)           | -62.1 (-92.2 to -1.0)                          | -89.1 (-100.0 to -14.4)              |
| Guinea                                                                                                                          | 14.2 (12.6 to 16.4)        | 0.1 (0.1 to 0.1)           | 0.2 (0.2 to 0.3)           | 0.1 (0.0 to 1.6)           | -60.8 (-90.4 to 20.4)                          | 4.6 (-100.0 to 2037.1)               |
| Guinea-Bissau                                                                                                                   | 1.1 (1.0 to 1.3)           | 0.0 (0.0 to 0.0)           | 0.0 (0.0 to 0.0)           | 11.5 (0.0 to 69.8)         | 46.0 (0.0 to 135.8)                            | 11451458547.3 (0.0 to 69784133539.3) |
| Liberia                                                                                                                         | 3.5 (3.5 to 3.5)           | 0.0 (0.0 to 0.0)           | 0.1 (0.1 to 0.1)           | 5.3 (0.0 to 60.7)          | -40.0 (-82.9 to 52.7)                          | 24316.2 (-100.0 to 270879.7)         |
| Mali                                                                                                                            | 18.2 (15.6 to 21.1)        | 1.3 (1.2 to 1.4)           | 4.3 (3.7 to 5.0)           | 0.8 (0.0 to 11.2)          | -65.8 (-109.7 to 14.0)                         | -40.6 (-100.0 to 711.5)              |
| Mauritania                                                                                                                      | 0.0 (0.0 to 0.0)           | 0.0 (0.0 to 0.0)           | 0.1 (0.0 to 0.1)           | 1.0 (0.0 to 14.2)          | -54.0 (-84.3 to 41.8)                          | 3807.4 (-100.0 to 52672.1)           |
| Niger                                                                                                                           | 0.1 (0.1 to 0.1)           | 3.1 (2.9 to 3.4)           | 1.4 (1.2 to 1.7)           | 0.1 (0.0 to 0.6)           | -76.3 (-115.5 to -11.1)                        | -98.0 (-100.0 to -81.1)              |
| Nigeria                                                                                                                         | 0.2 (0.1 to 0.2)           | 0.0 (0.0 to 0.0)           | 2.0 (1.7 to 2.3)           | 46.6 (0.0 to 11.1)         | 66.2677985.1 (0.0 to 11077326568.4)            | -2.2 (-0.3 to 4.0)                   |
| Sao Tome and Principe                                                                                                           | 0.0 (0.0 to 0.0)           | 0.0 (0.0 to 0.0)           | 0.0 (0.0 to 0.0)           | 0.0 (0.0 to 0.0)           | 0.0 (0.0 to 0.0)                               | 0.0 (0.0 to 0.0)                     |
| Senegal                                                                                                                         | 0.8 (0.7 to 0.8)           | 0.0 (0.0 to 0.0)           | 0.0 (0.0 to 0.0)           | 0.1 (0.0 to 1.6)           | -32.3 (-75.4 to 36.2)                          | 1960.1 (-100.0 to 22578.1)           |
| Sierra Leone                                                                                                                    | 21.2 (20.8 to 21.7)        | 0.0 (0.0 to 0.0)           | 0.0 (0.0 to 0.0)           | 2.2 (0.0 to 34.8)          | 31.2 (0.0 to 131.1)                            | 2206968530.2 (0.0 to 34556586372.9)  |
| Togo                                                                                                                            | 0.0 (0.0 to 0.0)           | 0.0 (0.0 to 0.0)           | 0.3 (0.2 to 0.3)           | 0.0 (0.0 to 0.4)           | 20.0 (0.0 to 101.4)                            | 32379458.6 (0.0 to 404845972.6)      |
| <b>Indicator 16.1.3a: Age-standardised prevalence of physical violence experienced by populations in the past 12 months (%)</b> |                            |                            |                            |                            |                                                |                                      |
| <b>Central Europe, Eastern Europe, and Central Asia</b>                                                                         |                            |                            |                            |                            |                                                |                                      |
| <b>Central Asia</b>                                                                                                             |                            |                            |                            |                            |                                                |                                      |
| Armenia                                                                                                                         | 4.6 (4.0 to 5.2)           | 4.6 (4.0 to 5.2)           | 4.6 (4.0 to 5.2)           | 4.6 (4.0 to 5.2)           | 0.0 (-0.0 to 0.0)                              | 0.0 (-0.4 to 0.4)                    |
| Azerbaijan                                                                                                                      | 4.9 (4.6 to 5.2)           | 4.9 (4.6 to 5.1)           | 4.9 (4.6 to 5.1)           | 4.8 (4.5 to 5.1)           | -0.0 (-0.1 to 0.1)                             | -0.5 (-1.8 to 1.0)                   |
| Georgia                                                                                                                         | 2.6 (2.5 to 2.8)           | 2.7 (2.5 to 2.9)           | 2.7 (2.5 to 2.9)           | 2.7 (2.5 to 2.9)           | 0.0 (-0.0 to 0.1)                              | 0.5 (-0.1 to 1.0)                    |
| Kazakhstan                                                                                                                      | 3.9 (3.7 to 4.2)           | 4.0 (3.7 to 4.2)           | 4.0 (3.7 to 4.2)           | 4.0 (3.7 to 4.2)           | -0.0 (-0.1 to 0.1)                             | -0.0 (-1.2 to 1.2)                   |
| Kyrgyzstan                                                                                                                      | 7.1 (6.7 to 7.5)           | 7.1 (6.7 to 7.4)           | 7.1 (6.7 to 7.4)           | 7.1 (6.7 to 7.4)           | -0.0 (-0.1 to 0.1)                             | -0.3 (-1.7 to 1.1)                   |
| Mongolia                                                                                                                        | 4.6 (4.0 to 5.2)           | 4.6 (4.0 to 5.2)           | 4.6 (4.0 to 5.2)           | 4.6 (4.0 to 5.2)           | 0.0 (-0.0 to 0.0)                              | 0.0 (-0.0 to 0.1)                    |
| Tajikistan                                                                                                                      | 6.7 (6.3 to 7.1)           | 6.7 (6.4 to 7.0)           | 6.7 (6.4 to 7.0)           | 6.7 (6.4 to 7.0)           | -0.0 (-0.1 to 0.1)                             | -0.1 (-1.5 to 1.5)                   |
| Turkmenistan                                                                                                                    | 4.6 (4.0 to 5.2)           | 4.6 (4.0 to 5.1)           | 4.5 (4.0 to 5.1)           | 4.5 (4.0 to 5.1)           | -0.0 (-0.0 to 0.0)                             | -0.2 (-0.3 to 0.0)                   |
| Uzbekistan                                                                                                                      | 4.6 (4.0 to 5.2)           | 4.6 (4.0 to 5.2)           | 4.6 (4.0 to 5.2)           | 4.6 (4.0 to 5.2)           | -0.0 (-0.0 to 0.0)                             | -0.2 (-0.4 to 0.0)                   |
| <b>Central Europe</b>                                                                                                           |                            |                            |                            |                            |                                                |                                      |
| Albania                                                                                                                         | 3.6 (3.4 to 3.9)           | 3.7 (3.5 to 3.9)           | 3.7 (3.5 to 3.9)           | 3.7 (3.5 to 3.9)           | -0.0 (-0.0 to 0.0)                             | -0.0 (-0.3 to 0.3)                   |
| Bosnia and Herzegovina                                                                                                          | 3.7 (3.4 to 3.9)           | 3.7 (3.4 to 3.9)           | 3.7 (3.4 to 3.9)           | 3.7 (3.4 to 3.9)           | 0.0 (0.0 to 0.0)                               | 0.0 (0.0 to 0.0)                     |
| Bulgaria                                                                                                                        | 3.7 (3.4 to 3.9)           | 3.7 (3.4 to 3.9)           | 3.7 (3.4 to 3.9)           | 3.7 (3.4 to 3.9)           | -0.0 (-0.0 to 0.0)                             | -0.2 (-0.2 to -0.1)                  |
| Croatia                                                                                                                         | 3.7 (3.4 to 3.9)           | 3.7 (3.4 to 3.9)           | 3.7 (3.4 to 3.9)           | 3.7 (3.4 to 3.9)           | -0.0 (-0.0 to 0.0)                             | -0.0 (-0.0 to 0.0)                   |
| Czech Republic                                                                                                                  | 3.7 (3.4 to 3.9)           | 3.7 (3.4 to 3.9)           | 3.7 (3.4 to 3.9)           | 3.7 (3.4 to 3.9)           | -0.0 (-0.0 to 0.0)                             | -0.0 (-0.0 to 0.0)                   |
| Hungary                                                                                                                         | 3.7 (3.4 to 3.9)           | 3.7 (3.4 to 3.9)           | 3.7 (3.4 to 3.9)           | 3.7 (3.4 to 3.9)           | -0.0 (-0.0 to 0.0)                             | -0.1 (-0.1 to 0.1)                   |
| Macedonia                                                                                                                       | 3.7 (3.4 to 3.9)           | 3.7 (3.4 to 3.9)           | 3.7 (3.4 to 3.9)           | 3.7 (3.4 to 3.9)           | 0.0 (0.0 to 0.0)                               | 0.1 (0.1 to 0.1)                     |
| Montenegro                                                                                                                      | 3.7 (3.4 to 3.9)           | 3.7 (3.4 to 3.9)           | 3.7 (3.4 to 3.9)           | 3.7 (3.4 to 3.9)           | -0.0 (-0.0 to 0.0)                             | -0.1 (-0.1 to 0.0)                   |
| Poland                                                                                                                          | 3.7 (3.4 to 3.9)           | 3.7 (3.4 to 3.9)           | 3.7 (3.4 to 3.9)           | 3.7 (3.4 to 3.9)           | 0.0 (0.0 to 0.0)                               | 0.0 (0.0 to 0.0)                     |
| Romania                                                                                                                         | 3.7 (3.4 to 3.9)           | 3.7 (3.4 to 3.9)           | 3.7 (3.4 to 3.9)           | 3.7 (3.4 to 3.9)           | -0.0 (-0.0 to 0.0)                             | -0.1 (-0.1 to 0.0)                   |
| Serbia                                                                                                                          | 3.7 (3.4 to 3.9)           | 3.7 (3.5 to 3.9)           | 3.7 (3.5 to 3.9)           | 3.7 (3.5 to 3.9)           | -0.0 (-0.0 to 0.0)                             | -0.0 (-0.0 to 0.0)                   |
| Slovakia                                                                                                                        | 3.7 (3.4 to 3.9)           | 3.7 (3.4 to 3.9)           | 3.7 (3.4 to 3.9)           | 3.7 (3.4 to 3.9)           | -0.0 (-0.0 to 0.0)                             | -0.0 (-0.1 to 0.0)                   |
| Slovenia                                                                                                                        | 3.7 (3.4 to 3.9)           | 3.7 (3.4 to 3.9)           | 3.7 (3.4 to 3.9)           | 3.7 (3.4 to 3.9)           | -0.0 (-0.0 to 0.0)                             | -0.0 (-0.1 to 0.0)                   |
| <b>Eastern Europe</b>                                                                                                           |                            |                            |                            |                            |                                                |                                      |
| Belarus                                                                                                                         | 5.3 (5.0 to 5.7)           | 5.3 (5.0 to 5.7)           | 5.3 (5.0 to 5.7)           | 5.3 (5.0 to 5.6)           | -0.0 (-0.0 to 0.0)                             | -0.5 (-0.6 to -0.5)                  |
| Estonia                                                                                                                         | 5.3 (5.0 to 5.7)           | 5.3 (5.0 to 5.6)           | 5.3 (5.0 to 5.6)           | 5.3 (5.0 to 5.6)           | -0.0 (-0.0 to 0.0)                             | -0.4 (-0.4 to -0.3)                  |
| Latvia                                                                                                                          | 5.3 (5.0 to 5.7)           | 5.3 (5.0 to 5.6)           | 5.3 (5.0 to 5.6)           | 5.3 (5.0 to 5.6)           | -0.0 (-0.0 to 0.0)                             | -0.7 (-0.7 to -0.6)                  |
| Lithuania                                                                                                                       | 5.3 (5.0 to 5.7)           | 5.3 (5.0 to 5.7)           | 5.3 (5.0 to 5.7)           | 5.3 (5.0 to 5.6)           | -0.0 (-0.0 to 0.0)                             | -0.6 (-0.7 to -0.6)                  |
| Moldova                                                                                                                         | 5.6 (5.3 to 5.9)           | 5.7 (5.4 to 6.0)           | 5.6 (5.3 to 5.9)           | 5.5 (5.2 to 5.8)           | -0.2 (-0.3 to -0.1)                            | -2.7 (-4.6 to -0.8)                  |
| Russia                                                                                                                          | 5.3 (5.1 to 5.6)           | 5.3 (5.1 to 5.6)           | 5.3 (5.1 to 5.6)           | 5.3 (5.1 to 5.6)           | -0.0 (-0.0 to 0.0)                             | -0.3 (-0.3 to -0.3)                  |
| Ukraine                                                                                                                         | 4.8 (4.6 to 5.0)           | 4.8 (4.6 to 5.1)           | 4.8 (4.5 to 5.0)           | 4.8 (4.5 to 5.0)           | -0.1 (-0.2 to 0.0)                             | -1.3 (-3.0 to 0.4)                   |
| <b>High-income</b>                                                                                                              |                            |                            |                            |                            |                                                |                                      |
| <b>Australasia</b>                                                                                                              |                            |                            |                            |                            |                                                |                                      |
| Australia                                                                                                                       | 3.7 (3.5 to 4.0)           | 3.7 (3.5 to 4.0)           | 3.7 (3.4 to 4.0)           | 3.7 (3.4 to 4.0)           | -0.0 (-0.2 to 0.2)                             | -0.3 (-3.3 to 2.8)                   |
| New Zealand                                                                                                                     | 8.9 (8.4 to 9.5)           | 9.0 (8.5 to 9.5)           | 8.9 (8.4 to 9.5)           | 8.9 (8.4 to 9.5)           | -0.0 (-0.2 to 0.1)                             | -0.6 (-2.4 to 1.1)                   |
| <b>High-income Asia Pacific</b>                                                                                                 |                            |                            |                            |                            |                                                |                                      |
| Brunei                                                                                                                          | 3.7 (3.4 to 4.1)           | 3.7 (3.4 to 4.0)           | 3.7 (3.4 to 4.0)           | 3.7 (3.4 to 4.0)           | -0.0 (-0.0 to 0.0)                             | -0.0 (-0.1 to 0.0)                   |
| Japan                                                                                                                           | 3.7 (3.5 to 4.0)           | 3.7 (3.5 to 4.0)           | 3.7 (3.5 to 4.0)           | 3.7 (3.5 to 4.0)           | -0.0 (-0.0 to 0.0)                             | -0.0 (-0.0 to 0.0)                   |
| South Korea                                                                                                                     | 3.7 (3.4 to 4.0)           | 3.7 (3.4 to 4.0)           | 3.7 (3.4 to 4.0)           | 3.7 (3.4 to 4.0)           | 0.0 (0.0 to 0.0)                               | 0.1 (0.0 to 0.2)                     |
| Singapore                                                                                                                       | 3.7 (3.3 to 4.0)           | 3.8 (3.4 to 4.1)           | 3.8 (3.4 to 4.1)           | 3.8 (3.4 to 4.1)           | -0.0 (-0.0 to 0.0)                             | -0.1 (-0.2 to 0.0)                   |
| <b>High-income North America</b>                                                                                                |                            |                            |                            |                            |                                                |                                      |
| Canada                                                                                                                          | 2.5 (2.3 to 2.7)           | 2.4 (2.2 to 2.6)           | 2.4 (2.2 to 2.6)           | 2.4 (2.2 to 2.6)           | -0.0 (-0.1 to 0.0)                             | -0.4 (-0.8 to 0.1)                   |
| Greenland                                                                                                                       | 1.9 (1.7 to 2.2)           | 1.9 (1.7 to 2.2)           | 1.9 (1.7 to 2.2)           | 1.9 (1.7 to 2.2)           | -0.0 (-0.0 to 0.0)                             | -0.0 (-0.1 to 0.1)                   |
| United States                                                                                                                   | 1.3 (1.2 to 1.4)           | 1.3 (1.2 to 1.4)           | 1.3 (1.2 to 1.4)           | 1.4 (1.3 to 1.4)           | 0.4 (0.3 to 0.5)                               | 6.2 (4.5 to 7.8)                     |
| <b>Southern Latin America</b>                                                                                                   |                            |                            |                            |                            |                                                |                                      |
| Argentina                                                                                                                       | 6.2 (5.5 to 6.8)           | 6.1 (5.4 to 6.8)           | 6.1 (5.4 to 6.8)           | 6.1 (5.4 to 6.8)           | 0.0 (-0.0 to 0.0)                              | 0.1 (-0.4 to 0.5)                    |
| Chile                                                                                                                           | 4.3 (3.6 to 5.2)           | 4.3 (3.6 to 5.2)           | 4.3 (3.6 to 5.2)           | 4.3 (3.6 to 5.2)           | -0.0 (-0.0 to 0.0)                             | -0.1 (-0.2 to -0.1)                  |
| Uruguay                                                                                                                         | 3.0 (2.7 to 3.4)           | 3.0 (2.6 to 3.3)           | 3.0 (2.6 to 3.3)           | 3.0 (2.6 to 3.3)           | -0.0 (-0.1 to 0.0)                             | -0.3 (-1.0 to 0.3)                   |
| <b>Western Europe</b>                                                                                                           |                            |                            |                            |                            |                                                |                                      |
| Andorra                                                                                                                         | 3.9 (3.3 to 4.7)           | 3.9 (3.3 to 4.7)           | 3.9 (3.3 to 4.7)           | 3.9 (3.3 to 4.7)           | -0.0 (-0.0 to 0.0)                             | -0.3 (-0.4 to -0.2)                  |
| Austria                                                                                                                         | 4.0 (3.3 to 4.7)           | 4.0 (3.3 to 4.7)           | 4.0 (3.3 to 4.7)           | 3.9 (3.3 to 4.7)           | -0.0 (-0.0 to 0.0)                             | -0.4 (-0.5 to -0.3)                  |
| Belgium                                                                                                                         | 4.0 (3.3 to 4.7)           | 4.0 (3.3 to 4.7)           | 4.0 (3.3 to 4.7)           | 4.0 (3.3 to 4.7)           | -0.0 (-0.0 to 0.0)                             | -0.3 (-0.4 to -0.3)                  |
| Cyprus                                                                                                                          | 3.9 (3.3 to 4.7)           | 4.0 (3.3 to 4.7)           | 4.0 (3.3 to 4.7)           | 3.9 (3.3 to 4.6)           | -0.1 (-0.1 to -0.1)                            | -1.0 (-1.4 to -0.8)                  |
| Denmark                                                                                                                         | 4.0 (3.3 to 4.7)           | 4.0 (3.3 to 4.7)           | 4.0 (3.3 to 4.7)           | 4.0 (3.3 to 4.7)           | -0.0 (-0.0 to 0.0)                             | -0.0 (-0.0 to 0.0)                   |
| Finland                                                                                                                         | 4.0 (3.3 to 4.7)           | 4.0 (3.3 to 4.7)           | 4.0 (3.3 to 4.7)           | 4.0 (3.3 to 4.7)           | -0.0 (-0.0 to 0.0)                             | -0.2 (-0.2 to -0.1)                  |
| France                                                                                                                          | 4.0 (3.3 to 4.7)           | 4.0 (3.3 to 4.7)           | 4.0 (3.3 to 4.7)           | 4.0 (3.3 to 4.7)           | -0.0 (-0.0 to 0.0)                             | -0.3 (-0.4 to -0.3)                  |

|                                     | Estimate in 2000 (95% UIs) | Estimate in 2015 (95% UIs) | Estimate in 2017 (95% UIs) | Estimate in 2020 (95% UIs) | Annualised rate of change, 2015-2020 (95% UIs) | Percent change, 2015-2020 (95% UIs) |
|-------------------------------------|----------------------------|----------------------------|----------------------------|----------------------------|------------------------------------------------|-------------------------------------|
| Germany                             | 4.0 (3.3 to 4.7)           | 4.0 (3.3 to 4.7)           | 3.9 (3.3 to 4.7)           | 3.9 (3.3 to 4.7)           | -0.0 (-0.0 to -0.0)                            | -0.3 (-0.3 to -0.2)                 |
| Greece                              | 3.9 (3.3 to 4.7)           | 4.0 (3.3 to 4.7)           | 4.0 (3.3 to 4.7)           | 4.0 (3.3 to 4.7)           | -0.0 (-0.0 to 0.0)                             | -0.0 (-0.1 to 0.0)                  |
| Iceland                             | 4.0 (3.3 to 4.7)           | 4.0 (3.3 to 4.7)           | 4.0 (3.3 to 4.7)           | 4.0 (3.3 to 4.7)           | -0.0 (-0.0 to -0.0)                            | -0.2 (-0.3 to -0.2)                 |
| Ireland                             | 4.0 (3.3 to 4.7)           | 4.0 (3.3 to 4.7)           | 4.0 (3.3 to 4.7)           | 4.0 (3.3 to 4.7)           | -0.0 (-0.1 to -0.0)                            | -0.6 (-0.8 to -0.4)                 |
| Israel                              | 4.0 (3.3 to 4.7)           | 4.0 (3.3 to 4.7)           | 4.0 (3.3 to 4.7)           | 4.0 (3.3 to 4.7)           | -0.0 (-0.0 to -0.0)                            | -0.3 (-0.3 to -0.2)                 |
| Italy                               | 4.0 (3.3 to 4.7)           | 4.0 (3.3 to 4.7)           | 4.0 (3.3 to 4.7)           | 4.0 (3.3 to 4.7)           | -0.0 (-0.0 to -0.0)                            | -0.3 (-0.3 to -0.2)                 |
| Luxembourg                          | 4.0 (3.3 to 4.7)           | 4.0 (3.3 to 4.7)           | 4.0 (3.3 to 4.7)           | 4.0 (3.3 to 4.7)           | -0.0 (-0.0 to -0.0)                            | -0.1 (-0.2 to -0.1)                 |
| Malta                               | 4.0 (3.3 to 4.7)           | 3.9 (3.3 to 4.7)           | 3.9 (3.3 to 4.7)           | 3.9 (3.3 to 4.7)           | -0.0 (-0.0 to 0.0)                             | -0.1 (-0.7 to 0.6)                  |
| Netherlands                         | 4.0 (3.3 to 4.7)           | 4.0 (3.3 to 4.7)           | 4.0 (3.3 to 4.7)           | 4.0 (3.3 to 4.7)           | -0.0 (-0.0 to -0.0)                            | -0.3 (-0.4 to -0.3)                 |
| Norway                              | 4.0 (3.6 to 4.3)           | 3.9 (3.6 to 4.3)           | 3.9 (3.6 to 4.3)           | 3.9 (3.6 to 4.3)           | -0.0 (-0.0 to -0.0)                            | -0.2 (-0.2 to -0.2)                 |
| Portugal                            | 4.0 (3.3 to 4.7)           | 4.0 (3.3 to 4.7)           | 4.0 (3.3 to 4.7)           | 4.0 (3.3 to 4.7)           | -0.0 (-0.1 to -0.0)                            | -0.7 (-0.9 to -0.6)                 |
| Spain                               | 1.7 (1.5 to 1.8)           | 1.7 (1.5 to 1.8)           | 1.7 (1.5 to 1.8)           | 1.7 (1.5 to 1.8)           | 0.0 (-0.0 to 0.1)                              | 0.2 (0.6 to 1.0)                    |
| Sweden                              | 4.6 (4.4 to 4.9)           | 4.6 (4.4 to 4.9)           | 4.6 (4.4 to 4.9)           | 4.6 (4.4 to 4.9)           | 0.0 (-0.0 to 0.0)                              | 0.0 (-0.4 to 0.5)                   |
| Switzerland                         | 4.0 (3.3 to 4.7)           | 4.0 (3.3 to 4.7)           | 4.0 (3.3 to 4.7)           | 4.0 (3.3 to 4.7)           | -0.0 (-0.0 to -0.0)                            | -0.0 (-0.1 to -0.0)                 |
| United Kingdom                      | 5.5 (5.2 to 5.8)           | 5.4 (5.1 to 5.7)           | 5.4 (5.1 to 5.7)           | 5.4 (5.1 to 5.7)           | -0.0 (-0.1 to 0.0)                             | -0.3 (-1.0 to 0.6)                  |
| <b>Latin America and Caribbean</b>  |                            |                            |                            |                            |                                                |                                     |
| <b>Andean Latin America</b>         |                            |                            |                            |                            |                                                |                                     |
| Bolivia                             | 18.4 (17.5 to 19.4)        | 18.4 (17.6 to 19.2)        | 18.4 (17.5 to 19.4)        | 18.4 (17.5 to 19.5)        | 0.0 (-0.1 to 0.2)                              | 0.5 (-1.3 to 2.4)                   |
| Ecuador                             | 8.2 (7.8 to 8.6)           | 8.3 (7.9 to 8.7)           | 8.3 (7.9 to 8.7)           | 8.3 (7.9 to 8.8)           | 0.0 (-0.0 to 0.0)                              | 0.1 (-0.4 to 0.7)                   |
| Peru                                | 7.0 (6.7 to 7.3)           | 6.9 (6.7 to 7.2)           | 6.9 (6.6 to 7.1)           | 6.8 (6.5 to 7.0)           | -0.2 (-0.3 to -0.0)                            | -2.3 (-4.2 to -0.3)                 |
| <b>Caribbean</b>                    |                            |                            |                            |                            |                                                |                                     |
| Antigua and Barbuda                 | 2.4 (1.7 to 3.5)           | 2.4 (1.7 to 3.4)           | 2.4 (1.7 to 3.4)           | 2.3 (1.7 to 3.3)           | -0.1 (-0.1 to -0.1)                            | -1.5 (-2.2 to -1.0)                 |
| The Bahamas                         | 2.4 (1.7 to 3.4)           | 2.4 (1.7 to 3.4)           | 2.4 (1.7 to 3.4)           | 2.4 (1.7 to 3.4)           | -0.0 (-0.0 to -0.0)                            | -0.3 (-0.5 to -0.2)                 |
| Barbados                            | 2.3 (1.7 to 3.4)           | 2.3 (1.7 to 3.4)           | 2.3 (1.7 to 3.4)           | 2.3 (1.7 to 3.4)           | -0.0 (-0.1 to -0.0)                            | -0.5 (-0.8 to -0.2)                 |
| Belize                              | 2.3 (1.7 to 3.4)           | 2.3 (1.7 to 3.4)           | 2.3 (1.7 to 3.4)           | 2.3 (1.7 to 3.4)           | -0.0 (-0.0 to 0.0)                             | -0.3 (-0.6 to 0.0)                  |
| Bermuda                             | 2.4 (1.7 to 3.4)           | 2.4 (1.7 to 3.4)           | 2.4 (1.7 to 3.4)           | 2.4 (1.7 to 3.4)           | -0.0 (-0.0 to -0.0)                            | -0.3 (-0.5 to -0.1)                 |
| Cuba                                | 2.3 (1.7 to 3.3)           | 2.3 (1.6 to 3.3)           | 2.3 (1.6 to 3.3)           | 2.3 (1.6 to 3.3)           | -0.0 (-0.0 to 0.0)                             | -0.2 (-0.4 to 0.0)                  |
| Dominica                            | 2.3 (1.6 to 3.3)           | 2.3 (1.6 to 3.3)           | 2.3 (1.6 to 3.3)           | 2.3 (1.6 to 3.3)           | -0.0 (-0.0 to -0.0)                            | -0.3 (-0.5 to -0.1)                 |
| Dominican Republic                  | 4.8 (4.6 to 5.1)           | 4.9 (4.7 to 5.1)           | 4.9 (4.6 to 5.2)           | 4.8 (4.5 to 5.2)           | -0.0 (-0.3 to 0.2)                             | -0.6 (-3.7 to 2.8)                  |
| Grenada                             | 2.3 (1.7 to 3.4)           | 2.3 (1.6 to 3.3)           | 2.3 (1.6 to 3.3)           | 2.3 (1.6 to 3.3)           | -0.0 (-0.0 to 0.0)                             | -0.3 (-0.6 to 0.1)                  |
| Guyana                              | 2.3 (1.7 to 3.4)           | 2.3 (1.7 to 3.4)           | 2.4 (1.7 to 3.4)           | 2.3 (1.7 to 3.4)           | -0.0 (-0.1 to 0.1)                             | -0.3 (-1.1 to 0.8)                  |
| Haiti                               | 4.8 (4.5 to 5.0)           | 4.5 (4.3 to 4.7)           | 4.5 (4.3 to 4.7)           | 4.4 (4.1 to 4.7)           | -0.2 (-0.3 to 0.1)                             | -2.2 (-5.1 to 0.9)                  |
| Jamaica                             | 2.4 (1.7 to 3.4)           | 2.3 (1.7 to 3.4)           | 2.3 (1.7 to 3.4)           | 2.3 (1.7 to 3.4)           | -0.0 (-0.1 to -0.0)                            | -0.7 (-1.2 to -0.1)                 |
| Puerto Rico                         | 0.7 (0.6 to 0.7)           | 0.7 (0.6 to 0.7)           | 0.7 (0.6 to 0.7)           | 0.7 (0.6 to 0.7)           | 0.1 (-0.1 to 0.2)                              | 0.8 (-1.2 to 2.8)                   |
| Saint Lucia                         | 2.4 (1.7 to 3.4)           | 2.3 (1.7 to 3.4)           | 2.3 (1.7 to 3.4)           | 2.3 (1.7 to 3.4)           | -0.0 (-0.0 to -0.0)                            | -0.5 (-0.7 to -0.3)                 |
| Saint Vincent and the Grenadines    | 2.3 (1.6 to 3.3)           | 2.3 (1.6 to 3.3)           | 2.3 (1.6 to 3.3)           | 2.3 (1.7 to 3.3)           | 0.0 (0.0 to 0.0)                               | 0.3 (0.1 to 0.6)                    |
| Suriname                            | 2.3 (1.7 to 3.3)           | 2.3 (1.7 to 3.4)           | 2.3 (1.7 to 3.4)           | 2.3 (1.7 to 3.4)           | 0.0 (-0.0 to 0.0)                              | 0.0 (-0.2 to 0.3)                   |
| Trinidad and Tobago                 | 2.3 (1.7 to 3.4)           | 2.3 (1.7 to 3.3)           | 2.3 (1.7 to 3.3)           | 2.3 (1.7 to 3.3)           | -0.0 (-0.0 to -0.0)                            | -0.1 (-0.2 to -0.0)                 |
| Virgin Islands, U.S.                | 1.3 (1.2 to 1.4)           | 1.3 (1.2 to 1.4)           | 1.3 (1.2 to 1.4)           | 1.3 (1.2 to 1.4)           | 0.0 (-0.1 to 0.2)                              | 0.6 (-1.3 to 2.6)                   |
| <b>Central Latin America</b>        |                            |                            |                            |                            |                                                |                                     |
| Colombia                            | 12.1 (11.5 to 12.7)        | 12.5 (12.0 to 12.9)        | 12.6 (12.0 to 13.1)        | 12.8 (12.2 to 13.4)        | 0.2 (0.0 to 0.3)                               | 3.0 (0.6 to 5.0)                    |
| Costa Rica                          | 7.2 (6.6 to 7.7)           | 7.2 (6.7 to 7.7)           | 7.2 (6.7 to 7.7)           | 7.2 (6.7 to 7.7)           | 0.0 (-0.0 to 0.0)                              | 0.1 (-0.3 to 0.4)                   |
| El Salvador                         | 5.6 (5.3 to 5.9)           | 5.6 (5.3 to 5.9)           | 5.6 (5.3 to 5.9)           | 5.6 (5.3 to 5.9)           | 0.0 (-0.1 to 0.1)                              | 0.2 (-1.0 to 1.3)                   |
| Guatemala                           | 4.4 (4.2 to 4.6)           | 4.4 (4.2 to 4.6)           | 4.3 (4.2 to 4.6)           | 4.3 (4.1 to 4.5)           | -0.1 (-0.3 to -0.0)                            | -2.0 (-3.7 to -0.0)                 |
| Honduras                            | 5.5 (5.2 to 5.7)           | 5.8 (5.6 to 6.1)           | 5.9 (5.6 to 6.1)           | 6.0 (5.6 to 6.3)           | 0.2 (0.0 to 0.3)                               | 3.0 (0.4 to 5.4)                    |
| Mexico                              | 6.7 (6.0 to 7.4)           | 6.7 (6.0 to 7.4)           | 6.7 (6.0 to 7.4)           | 6.7 (6.0 to 7.4)           | -0.0 (-0.0 to 0.0)                             | -0.0 (-0.1 to 0.0)                  |
| Nicaragua                           | 5.0 (4.7 to 5.2)           | 4.8 (4.6 to 5.0)           | 4.8 (4.6 to 5.1)           | 4.8 (4.5 to 5.0)           | -0.0 (-0.2 to 0.1)                             | -0.3 (-2.8 to 2.0)                  |
| Panama                              | 6.7 (5.4 to 8.1)           | 6.7 (5.4 to 8.1)           | 6.7 (5.4 to 8.1)           | 6.7 (5.4 to 8.1)           | 0.0 (0.0 to 0.0)                               | 0.0 (0.0 to 0.0)                    |
| Venezuela                           | 6.7 (5.4 to 8.1)           | 6.7 (5.4 to 8.1)           | 6.7 (5.4 to 8.1)           | 6.7 (5.4 to 8.1)           | 0.0 (0.0 to 0.0)                               | 0.0 (0.0 to 0.0)                    |
| <b>Tropical Latin America</b>       |                            |                            |                            |                            |                                                |                                     |
| Brazil                              | 4.4 (4.2 to 4.6)           | 4.4 (4.2 to 4.6)           | 4.4 (4.2 to 4.6)           | 4.4 (4.2 to 4.6)           | -0.0 (-0.0 to -0.0)                            | -0.1 (-0.1 to -0.1)                 |
| Paraguay                            | 4.4 (4.2 to 4.6)           | 4.4 (4.2 to 4.6)           | 4.4 (4.1 to 4.6)           | 4.4 (4.1 to 4.6)           | -0.0 (-0.1 to 0.1)                             | -0.1 (-1.5 to 1.5)                  |
| <b>North Africa and Middle East</b> |                            |                            |                            |                            |                                                |                                     |
| <b>North Africa and Middle East</b> |                            |                            |                            |                            |                                                |                                     |
| Afghanistan                         | 21.5 (20.4 to 22.7)        | 21.1 (20.2 to 22.2)        | 21.1 (20.1 to 22.1)        | 21.2 (20.2 to 22.2)        | 0.0 (-0.1 to 0.1)                              | 0.2 (-0.8 to 1.3)                   |
| Algeria                             | 12.4 (10.5 to 14.7)        | 12.4 (10.5 to 14.7)        | 12.5 (10.5 to 14.7)        | 12.4 (10.5 to 14.7)        | -0.0 (-0.0 to 0.0)                             | -0.1 (-0.2 to 0.0)                  |
| Bahrain                             | 12.1 (10.4 to 14.1)        | 11.9 (10.3 to 13.8)        | 11.9 (10.3 to 13.9)        | 11.9 (10.2 to 13.9)        | 0.0 (-0.1 to 0.1)                              | 0.1 (-1.1 to 1.3)                   |
| Egypt                               | 11.2 (10.7 to 11.7)        | 10.8 (10.3 to 11.4)        | 10.8 (10.2 to 11.4)        | 10.7 (10.1 to 11.3)        | -0.1 (-0.2 to 0.0)                             | -1.2 (-2.9 to 0.6)                  |
| Iran                                | 12.5 (11.3 to 13.7)        | 12.5 (11.3 to 13.7)        | 12.5 (11.3 to 13.7)        | 12.5 (11.3 to 13.7)        | -0.0 (-0.0 to 0.0)                             | -0.1 (-0.5 to 0.2)                  |
| Iraq                                | 12.4 (11.8 to 13.2)        | 12.4 (11.8 to 13.0)        | 12.4 (11.8 to 13.2)        | 12.4 (11.8 to 13.2)        | 0.0 (-0.1 to 0.1)                              | 0.4 (-1.3 to 2.0)                   |
| Jordan                              | 9.6 (9.1 to 10.2)          | 9.6 (9.2 to 10.2)          | 9.6 (9.1 to 10.2)          | 9.6 (9.1 to 10.2)          | 0.0 (-0.1 to 0.1)                              | 0.1 (-1.3 to 1.6)                   |
| Kuwait                              | 11.9 (10.3 to 13.9)        | 12.3 (10.4 to 14.5)        | 12.3 (10.4 to 14.5)        | 12.2 (10.4 to 14.4)        | 0.0 (-0.0 to 0.1)                              | 0.1 (-0.5 to 0.8)                   |
| Lebanon                             | 12.5 (10.5 to 14.8)        | 12.4 (10.5 to 14.7)        | 12.4 (10.5 to 14.7)        | 12.5 (10.6 to 14.7)        | 0.0 (-0.0 to 0.1)                              | 0.1 (-0.7 to 0.8)                   |
| Libya                               | 12.4 (10.5 to 14.7)        | 12.4 (10.5 to 14.6)        | 12.4 (10.5 to 14.6)        | 12.4 (10.5 to 14.6)        | -0.0 (-0.0 to 0.0)                             | -0.0 (-0.3 to 0.3)                  |
| Morocco                             | 12.5 (10.5 to 14.9)        | 12.5 (10.5 to 14.8)        | 12.5 (10.5 to 14.8)        | 12.4 (10.5 to 14.7)        | -0.0 (-0.1 to 0.0)                             | -0.3 (-0.8 to 0.1)                  |
| Palestine                           | 12.4 (10.5 to 14.7)        | 12.4 (10.5 to 14.7)        | 12.4 (10.5 to 14.7)        | 12.4 (10.5 to 14.7)        | 0.0 (-0.0 to 0.0)                              | 0.0 (-0.0 to 0.1)                   |
| Oman                                | 12.0 (10.3 to 14.1)        | 11.7 (10.2 to 13.6)        | 11.7 (10.2 to 13.5)        | 11.8 (10.2 to 13.6)        | 0.0 (-0.0 to 0.1)                              | 0.3 (-0.1 to 0.8)                   |
| Qatar                               | 11.7 (10.1 to 13.5)        | 11.3 (10.0 to 12.9)        | 11.3 (10.0 to 12.9)        | 11.4 (10.0 to 13.1)        | 0.1 (-0.0 to 0.2)                              | 1.0 (-0.3 to 2.3)                   |
| Saudi Arabia                        | 12.1 (10.4 to 14.2)        | 12.1 (10.4 to 14.1)        | 12.1 (10.4 to 14.1)        | 12.1 (10.4 to 14.2)        | 0.0 (-0.0 to 0.1)                              | 0.4 (-0.2 to 1.1)                   |
| Sudan                               | 12.5 (10.5 to 14.8)        | 12.5 (10.5 to 14.9)        | 12.5 (10.5 to 14.9)        | 12.5 (10.5 to 14.8)        | -0.0 (-0.0 to 0.0)                             | -0.1 (-0.2 to 0.0)                  |
| Syria                               | 12.4 (10.5 to 14.7)        | 12.4 (10.5 to 14.8)        | 12.4 (10.5 to 14.8)        | 12.4 (10.5 to 14.8)        | 0.0 (-0.0 to 0.0)                              | 0.1 (-0.2 to 0.3)                   |
| Tunisia                             | 12.5 (10.5 to 14.8)        | 12.5 (10.5 to 14.8)        | 12.5 (10.5 to 14.8)        | 12.5 (10.5 to 14.7)        | -0.0 (-0.0 to 0.0)                             | -0.3 (-0.6 to 0.1)                  |
| Turkey                              | 8.6 (8.1 to 9.1)           | 8.6 (8.1 to 9.1)           | 8.6 (8.1 to 9.1)           | 8.6 (8.1 to 9.1)           | -0.0 (-0.1 to 0.1)                             | -0.2 (-1.1 to 0.9)                  |
| United Arab Emirates                | 11.6 (10.1 to 13.3)        | 11.5 (10.0 to 13.2)        | 11.5 (10.1 to 13.3)        | 11.8 (10.2 to 13.7)        | 0.2 (0.0 to 0.3)                               | 2.4 (0.5 to 4.6)                    |
| Yemen                               | 12.4 (10.5 to 14.7)        | 12.5 (10.5 to 14.7)        | 12.5 (10.5 to 14.8)        | 12.5 (10.5 to 14.8)        | -0.0 (-0.0 to 0.0)                             | -0.1 (-0.3 to 0.1)                  |
| <b>South Asia</b>                   |                            |                            |                            |                            |                                                |                                     |
| <b>South Asia</b>                   |                            |                            |                            |                            |                                                |                                     |
| Bangladesh                          | 10.9 (10.3 to 11.5)        | 11.1 (10.5 to 11.7)        | 11.1 (10.5 to 11.7)        | 11.1 (10.4 to 11.7)        | -0.0 (-0.1 to 0.1)                             | -0.2 (-1.7 to 1.2)                  |
| Bhutan                              | 8.0 (7.5 to 8.5)           | 7.9 (7.5 to 8.4)           | 7.9 (7.5 to 8.4)           | 8.0 (7.4 to 8.5)           | 0.0 (-0.1 to 0.2)                              | 0.7 (-0.8 to 2.3)                   |
| India                               | 10.5 (10.0 to 11.0)        | 10.5 (10.0 to 11.0)        | 10.5 (10.0 to 11.0)        | 10.5 (10.0 to 11.1)        | -0.0 (-0.1 to 0.0)                             | -0.1 (-0.8 to 0.5)                  |

|                                               | Estimate in 2000 (95% UIs) | Estimate in 2015 (95% UIs) | Estimate in 2017 (95% UIs) | Estimate in 2020 (95% UIs) | Annualised rate of change, 2015-2020 (95% UIs) | Percent change, 2015-2020 (95% UIs) |
|-----------------------------------------------|----------------------------|----------------------------|----------------------------|----------------------------|------------------------------------------------|-------------------------------------|
| Nepal                                         | 7.4 (7.0 to 7.9)           | 7.4 (7.0 to 7.8)           | 7.4 (7.0 to 7.9)           | 7.5 (7.0 to 7.9)           | 0.1 (-0.0 to 0.1)                              | 0.8 (-0.5 to 2.1)                   |
| Pakistan                                      | 10.8 (10.2 to 11.5)        | 10.9 (10.3 to 11.5)        | 10.9 (10.3 to 11.5)        | 10.9 (10.3 to 11.5)        | -0.0 (-0.1 to 0.1)                             | -0.0 (-1.3 to 1.3)                  |
| <b>Southeast Asia, East Asia, and Oceania</b> |                            |                            |                            |                            |                                                |                                     |
| <b>East Asia</b>                              |                            |                            |                            |                            |                                                |                                     |
| China                                         | 3.5 (3.3 to 3.7)           | 3.5 (3.3 to 3.7)           | 3.5 (3.3 to 3.7)           | 3.5 (3.3 to 3.7)           | 0.0 (-0.0 to 0.1)                              | 0.1 (-0.5 to 0.8)                   |
| North Korea                                   | 3.5 (3.2 to 3.7)           | 3.5 (3.2 to 3.7)           | 3.5 (3.2 to 3.7)           | 3.5 (3.2 to 3.7)           | -0.0 (-0.0 to -0.0)                            | -0.0 (-0.1 to -0.0)                 |
| Taiwan (Province of China)                    | 3.5 (3.2 to 3.7)           | 3.5 (3.2 to 3.7)           | 3.5 (3.2 to 3.7)           | 3.5 (3.2 to 3.7)           | 0.0 (0.0 to 0.0)                               | 0.3 (0.1 to 0.4)                    |
| <b>Oceania</b>                                |                            |                            |                            |                            |                                                |                                     |
| American Samoa                                | 4.3 (3.9 to 4.6)           | 4.3 (3.9 to 4.6)           | 4.3 (3.9 to 4.6)           | 4.2 (3.9 to 4.6)           | -0.0 (-0.1 to -0.0)                            | -0.7 (-1.0 to -0.4)                 |
| Federated States of Micronesia                | 4.3 (3.9 to 4.6)           | 4.3 (3.9 to 4.6)           | 4.3 (3.9 to 4.6)           | 4.3 (3.9 to 4.6)           | -0.0 (-0.0 to 0.0)                             | -0.1 (-0.2 to 0.0)                  |
| Fiji                                          | 4.3 (3.9 to 4.6)           | 4.3 (3.9 to 4.6)           | 4.3 (3.9 to 4.6)           | 4.3 (3.9 to 4.6)           | 0.0 (0.0 to 0.0)                               | 0.0 (0.0 to 0.1)                    |
| Guam                                          | 4.3 (3.9 to 4.6)           | 4.3 (3.9 to 4.6)           | 4.2 (3.9 to 4.6)           | 4.3 (3.9 to 4.6)           | 0.0 (-0.0 to 0.0)                              | 0.0 (-0.0 to 0.1)                   |
| Kiribati                                      | 4.3 (4.0 to 4.7)           | 4.3 (4.0 to 4.7)           | 4.3 (4.0 to 4.7)           | 4.3 (4.0 to 4.6)           | -0.0 (-0.0 to -0.0)                            | -0.2 (-0.2 to -0.1)                 |
| Marshall Islands                              | 4.3 (3.9 to 4.6)           | 4.3 (3.9 to 4.6)           | 4.3 (3.9 to 4.6)           | 4.3 (3.9 to 4.6)           | 0.0 (0.0 to 0.0)                               | 0.1 (0.0 to 0.1)                    |
| Northern Mariana Islands                      | 4.3 (3.9 to 4.6)           | 4.3 (3.9 to 4.6)           | 4.2 (3.9 to 4.6)           | 4.2 (4.0 to 4.7)           | 0.1 (0.0 to 0.1)                               | 1.0 (0.5 to 1.4)                    |
| Papua New Guinea                              | 4.3 (3.9 to 4.6)           | 4.3 (3.9 to 4.6)           | 4.3 (3.9 to 4.6)           | 4.3 (3.9 to 4.6)           | -0.0 (-0.0 to 0.0)                             | -0.0 (-0.0 to 0.0)                  |
| Samoa                                         | 4.2 (3.9 to 4.6)           | 4.2 (3.9 to 4.6)           | 4.2 (3.9 to 4.6)           | 4.2 (3.9 to 4.6)           | -0.0 (-0.0 to -0.0)                            | -0.1 (-0.2 to -0.1)                 |
| Solomon Islands                               | 4.3 (3.9 to 4.6)           | 4.3 (3.9 to 4.6)           | 4.3 (3.9 to 4.6)           | 4.3 (3.9 to 4.6)           | -0.0 (-0.0 to 0.0)                             | -0.1 (-0.2 to 0.0)                  |
| Tonga                                         | 4.3 (3.9 to 4.6)           | 4.3 (3.9 to 4.6)           | 4.3 (3.9 to 4.6)           | 4.3 (3.9 to 4.6)           | -0.0 (-0.0 to -0.0)                            | -0.3 (-0.4 to -0.2)                 |
| Vanuatu                                       | 4.3 (3.9 to 4.6)           | 4.3 (3.9 to 4.6)           | 4.3 (3.9 to 4.6)           | 4.3 (3.9 to 4.6)           | 0.0 (0.0 to 0.0)                               | 0.2 (0.1 to 0.2)                    |
| <b>Southeast Asia</b>                         |                            |                            |                            |                            |                                                |                                     |
| Cambodia                                      | 5.6 (5.3 to 5.9)           | 5.4 (5.1 to 5.7)           | 5.4 (5.1 to 5.7)           | 5.4 (5.1 to 5.7)           | 0.0 (-0.1 to 0.2)                              | 0.2 (-2.1 to 2.6)                   |
| Indonesia                                     | 6.2 (5.4 to 7.0)           | 6.2 (5.4 to 6.9)           | 6.2 (5.4 to 6.9)           | 6.2 (5.4 to 6.9)           | -0.0 (-0.0 to -0.0)                            | -0.2 (-0.4 to -0.1)                 |
| Laos                                          | 6.2 (4.9 to 8.0)           | 6.2 (4.9 to 7.9)           | 6.2 (4.9 to 7.9)           | 6.2 (4.9 to 7.9)           | -0.0 (-0.0 to -0.0)                            | -0.4 (-0.7 to -0.2)                 |
| Malaysia                                      | 6.1 (4.9 to 7.8)           | 6.1 (4.8 to 7.7)           | 6.1 (4.8 to 7.7)           | 6.1 (4.8 to 7.8)           | -0.0 (-0.1 to 0.0)                             | -0.1 (-0.8 to 0.5)                  |
| Maldives                                      | 6.2 (4.9 to 7.9)           | 5.8 (4.6 to 7.2)           | 5.7 (4.6 to 7.2)           | 5.5 (4.5 to 7.0)           | -0.2 (-0.4 to -0.1)                            | -3.6 (-5.8 to -1.7)                 |
| Mauritius                                     | 6.2 (4.9 to 7.9)           | 6.2 (4.9 to 7.9)           | 6.2 (4.9 to 7.9)           | 6.2 (4.9 to 7.9)           | -0.0 (-0.0 to 0.0)                             | -0.1 (-0.2 to 0.0)                  |
| Myanmar                                       | 4.9 (4.6 to 5.2)           | 4.9 (4.7 to 5.2)           | 4.9 (4.7 to 5.2)           | 4.9 (4.7 to 5.2)           | -0.0 (-0.1 to 0.1)                             | -0.1 (-1.5 to 1.4)                  |
| Philippines                                   | 4.0 (3.7 to 4.2)           | 4.0 (3.7 to 4.2)           | 3.9 (3.7 to 4.2)           | 3.9 (3.6 to 4.2)           | -0.1 (-0.3 to 0.1)                             | -1.5 (-4.0 to 0.8)                  |
| Sri Lanka                                     | 4.1 (3.7 to 4.4)           | 4.1 (3.8 to 4.5)           | 4.1 (3.8 to 4.5)           | 4.1 (3.8 to 4.5)           | 0.0 (-0.0 to 0.1)                              | 0.3 (-0.2 to 0.7)                   |
| Seychelles                                    | 6.2 (4.9 to 7.9)           | 6.0 (4.8 to 7.6)           | 6.0 (4.8 to 7.6)           | 6.0 (4.8 to 7.6)           | 0.0 (-0.0 to 0.0)                              | 0.0 (-0.1 to 0.2)                   |
| Thailand                                      | 6.2 (4.9 to 8.0)           | 6.2 (4.9 to 7.9)           | 6.2 (4.9 to 7.9)           | 6.2 (4.9 to 7.9)           | -0.0 (-0.0 to -0.0)                            | -0.2 (-0.2 to -0.1)                 |
| Timor-Leste                                   | 12.5 (11.8 to 13.2)        | 12.5 (11.9 to 13.1)        | 12.5 (11.8 to 13.1)        | 12.5 (11.7 to 13.3)        | -0.0 (-0.2 to 0.1)                             | -0.1 (-2.5 to 2.1)                  |
| Vietnam                                       | 6.2 (5.0 to 8.0)           | 6.2 (4.9 to 7.9)           | 6.2 (4.9 to 7.9)           | 6.1 (4.9 to 7.8)           | -0.0 (-0.0 to -0.0)                            | -0.5 (-0.7 to -0.3)                 |
| <b>Sub-Saharan Africa</b>                     |                            |                            |                            |                            |                                                |                                     |
| <b>Central Sub-Saharan Africa</b>             |                            |                            |                            |                            |                                                |                                     |
| Angola                                        | 15.9 (14.4 to 17.5)        | 16.1 (14.5 to 17.7)        | 16.1 (14.5 to 17.7)        | 16.1 (14.5 to 17.7)        | -0.0 (-0.0 to -0.0)                            | -0.2 (-0.3 to -0.1)                 |
| Central African Republic                      | 13.5 (12.8 to 14.2)        | 13.5 (12.8 to 14.1)        | 13.5 (12.8 to 14.2)        | 13.5 (12.8 to 14.2)        | 0.0 (-0.1 to 0.1)                              | 0.2 (-1.3 to 1.7)                   |
| Congo                                         | 15.9 (14.4 to 17.5)        | 15.9 (14.4 to 17.4)        | 15.9 (14.4 to 17.4)        | 15.9 (14.4 to 17.4)        | -0.0 (-0.0 to 0.0)                             | -0.1 (-0.1 to 0.0)                  |
| Democratic Republic of the Congo              | 20.1 (19.1 to 21.2)        | 19.6 (18.7 to 20.6)        | 19.6 (18.6 to 20.6)        | 19.3 (18.2 to 20.5)        | -0.1 (-0.3 to 0.1)                             | -1.8 (-4.3 to 0.8)                  |
| Equatorial Guinea                             | 16.3 (14.8 to 18.0)        | 15.8 (14.3 to 17.3)        | 15.7 (14.3 to 17.3)        | 15.7 (14.3 to 17.2)        | -0.0 (-0.1 to 0.1)                             | -0.5 (-1.8 to 1.1)                  |
| Gabon                                         | 14.3 (13.6 to 15.1)        | 14.3 (13.7 to 15.0)        | 14.3 (13.7 to 15.0)        | 14.3 (13.6 to 15.0)        | 0.0 (-0.1 to 0.1)                              | 0.1 (-1.3 to 1.4)                   |
| <b>Eastern Sub-Saharan Africa</b>             |                            |                            |                            |                            |                                                |                                     |
| Burundi                                       | 14.1 (11.6 to 16.9)        | 14.0 (11.5 to 16.8)        | 14.0 (11.5 to 16.8)        | 14.0 (11.5 to 16.9)        | 0.0 (0.0 to 0.0)                               | 0.1 (0.0 to 0.2)                    |
| Comoros                                       | 8.2 (7.7 to 8.6)           | 8.2 (7.8 to 8.6)           | 8.2 (7.8 to 8.7)           | 8.2 (7.8 to 8.7)           | 0.0 (-0.0 to 0.1)                              | 0.3 (-0.3 to 0.9)                   |
| Djibouti                                      | 13.9 (11.4 to 16.8)        | 14.0 (11.5 to 17.0)        | 14.0 (11.5 to 17.0)        | 14.1 (11.5 to 17.0)        | 0.0 (0.0 to 0.0)                               | 0.1 (0.0 to 0.2)                    |
| Eritrea                                       | 14.1 (11.6 to 16.9)        | 14.0 (11.5 to 16.9)        | 14.0 (11.5 to 16.9)        | 14.0 (11.5 to 16.9)        | -0.0 (-0.0 to -0.0)                            | -0.1 (-0.2 to -0.1)                 |
| Ethiopia                                      | 14.1 (12.8 to 15.3)        | 14.1 (12.8 to 15.3)        | 14.1 (12.8 to 15.3)        | 14.1 (12.8 to 15.3)        | -0.0 (-0.0 to 0.0)                             | -0.0 (-0.1 to 0.0)                  |
| Kenya                                         | 11.2 (10.6 to 11.8)        | 11.2 (10.6 to 11.8)        | 11.2 (10.7 to 11.8)        | 11.4 (10.8 to 12.0)        | 0.1 (0.1 to 0.1)                               | 1.4 (0.8 to 2.1)                    |
| Madagascar                                    | 14.0 (11.6 to 16.9)        | 14.1 (11.6 to 16.9)        | 14.1 (11.6 to 16.9)        | 14.1 (11.6 to 16.9)        | 0.0 (-0.0 to 0.0)                              | 0.1 (-0.0 to 0.1)                   |
| Malawi                                        | 18.6 (17.6 to 19.6)        | 19.0 (18.1 to 19.9)        | 19.0 (18.1 to 20.0)        | 19.1 (18.1 to 20.1)        | 0.0 (-0.0 to 0.1)                              | 0.6 (-0.6 to 1.9)                   |
| Mozambique                                    | 13.7 (12.9 to 14.5)        | 13.9 (13.1 to 14.6)        | 13.8 (13.1 to 14.6)        | 13.7 (12.9 to 14.5)        | -0.1 (-0.2 to 0.0)                             | -1.3 (-3.1 to 0.5)                  |
| Rwanda                                        | 14.5 (13.8 to 15.3)        | 14.6 (14.0 to 15.4)        | 14.6 (13.9 to 15.4)        | 14.3 (13.5 to 15.2)        | -0.1 (-0.3 to -0.0)                            | -2.2 (-4.3 to -0.0)                 |
| Somalia                                       | 14.0 (11.5 to 16.9)        | 14.0 (11.5 to 16.9)        | 14.0 (11.5 to 16.9)        | 14.0 (11.5 to 16.9)        | -0.0 (-0.0 to 0.0)                             | -0.0 (-0.1 to 0.1)                  |
| South Sudan                                   | 14.0 (11.5 to 16.9)        | 14.1 (11.6 to 17.0)        | 14.1 (11.6 to 17.0)        | 14.1 (11.6 to 17.0)        | 0.0 (0.0 to 0.0)                               | 0.0 (0.0 to 0.1)                    |
| Tanzania                                      | 12.7 (12.0 to 13.4)        | 12.5 (11.9 to 13.2)        | 12.4 (11.7 to 13.1)        | 12.2 (11.5 to 13.1)        | -0.1 (-0.3 to 0.1)                             | -2.1 (-5.0 to 0.8)                  |
| Uganda                                        | 20.5 (19.6 to 21.6)        | 20.6 (19.6 to 21.6)        | 20.6 (19.6 to 21.6)        | 20.6 (19.6 to 21.7)        | -0.0 (-0.1 to 0.1)                             | -0.1 (-1.9 to 1.7)                  |
| Zambia                                        | 14.9 (14.2 to 15.6)        | 14.7 (14.1 to 15.4)        | 14.6 (13.9 to 15.3)        | 14.4 (13.6 to 15.3)        | -0.1 (-0.3 to 0.0)                             | -2.0 (-4.3 to 0.5)                  |
| <b>Southern Sub-Saharan Africa</b>            |                            |                            |                            |                            |                                                |                                     |
| Botswana                                      | 10.1 (9.4 to 10.9)         | 10.1 (9.4 to 10.9)         | 10.1 (9.4 to 10.9)         | 10.1 (9.4 to 10.9)         | 0.0 (0.0 to 0.0)                               | 0.1 (0.0 to 0.1)                    |
| Lesotho                                       | 10.1 (9.4 to 10.9)         | 10.1 (9.4 to 10.8)         | 10.1 (9.4 to 10.8)         | 10.1 (9.4 to 10.9)         | 0.0 (0.0 to 0.0)                               | 0.2 (0.1 to 0.4)                    |
| Namibia                                       | 10.4 (9.8 to 10.9)         | 10.4 (9.9 to 10.9)         | 10.4 (9.9 to 10.9)         | 10.4 (9.9 to 10.9)         | -0.0 (-0.1 to 0.1)                             | -0.1 (-1.2 to 1.2)                  |
| South Africa                                  | 8.2 (7.8 to 8.6)           | 8.2 (7.8 to 8.6)           | 8.2 (7.8 to 8.7)           | 8.3 (7.9 to 8.7)           | 0.0 (0.0 to 0.1)                               | 0.6 (0.4 to 0.8)                    |
| Swaziland                                     | 10.1 (9.4 to 10.9)         | 10.1 (9.4 to 10.9)         | 10.1 (9.4 to 10.9)         | 10.2 (9.5 to 10.9)         | 0.0 (0.0 to 0.0)                               | 0.3 (0.2 to 0.4)                    |
| Zimbabwe                                      | 12.3 (11.7 to 12.9)        | 11.7 (11.1 to 12.3)        | 11.7 (11.1 to 12.3)        | 11.4 (10.8 to 12.2)        | -0.1 (-0.3 to 0.0)                             | -2.2 (-4.7 to 0.4)                  |
| <b>Western Sub-Saharan Africa</b>             |                            |                            |                            |                            |                                                |                                     |
| Benin                                         | 13.2 (11.3 to 15.3)        | 13.2 (11.3 to 15.3)        | 13.2 (11.3 to 15.3)        | 13.2 (11.3 to 15.3)        | 0.0 (-0.0 to 0.0)                              | 0.0 (-0.0 to 0.1)                   |
| Burkina Faso                                  | 9.3 (8.8 to 9.7)           | 9.3 (8.8 to 9.7)           | 9.3 (8.8 to 9.7)           | 9.3 (8.8 to 9.8)           | 0.0 (-0.0 to 0.1)                              | 0.5 (-0.5 to 1.4)                   |
| Cameroon                                      | 13.0 (12.4 to 13.6)        | 13.2 (12.6 to 13.7)        | 13.1 (12.4 to 13.8)        | 13.0 (12.3 to 13.8)        | -0.1 (-0.2 to 0.1)                             | -0.9 (-3.0 to 1.5)                  |
| Cape Verde                                    | 13.2 (11.2 to 15.3)        | 13.0 (11.1 to 15.2)        | 13.0 (11.1 to 15.2)        | 13.1 (11.2 to 15.2)        | 0.0 (-0.0 to 0.0)                              | 0.1 (-0.0 to 0.3)                   |
| Chad                                          | 12.7 (12.0 to 13.3)        | 12.5 (11.9 to 13.1)        | 12.4 (11.9 to 13.1)        | 12.3 (11.7 to 13.0)        | -0.1 (-0.2 to 0.1)                             | -1.1 (-3.2 to 0.8)                  |
| Cote d'Ivoire                                 | 14.0 (13.3 to 14.7)        | 13.9 (13.4 to 14.6)        | 13.9 (13.4 to 14.6)        | 14.0 (13.4 to 14.6)        | 0.0 (-0.1 to 0.1)                              | 0.2 (-0.8 to 1.3)                   |
| The Gambia                                    | 9.6 (9.0 to 10.0)          | 9.5 (9.1 to 10.0)          | 9.5 (9.1 to 10.0)          | 9.6 (9.1 to 10.1)          | 0.0 (-0.0 to 0.1)                              | 0.2 (-0.5 to 1.0)                   |
| Ghana                                         | 12.6 (11.9 to 13.3)        | 12.6 (12.0 to 13.2)        | 12.6 (11.9 to 13.3)        | 12.6 (11.9 to 13.3)        | 0.0 (-0.1 to 0.1)                              | 0.3 (-1.3 to 1.9)                   |
| Guinea                                        | 13.2 (11.3 to 15.3)        | 13.2 (11.3 to 15.4)        | 13.2 (11.3 to 15.4)        | 13.2 (11.3 to 15.4)        | 0.0 (0.0 to 0.0)                               | 0.1 (0.0 to 0.1)                    |
| Guinea-Bissau                                 | 13.2 (11.3 to 15.3)        | 13.2 (11.3 to 15.3)        | 13.2 (11.3 to 15.3)        | 13.2 (11.3 to 15.3)        | 0.0 (0.0 to 0.0)                               | 0.2 (0.1 to 0.2)                    |
| Liberia                                       | 16.8 (16.0 to 17.7)        | 16.8 (16.1 to 17.7)        | 16.8 (16.0 to 17.7)        | 16.8 (15.9 to 17.8)        | 0.0 (-0.1 to 0.1)                              | 0.1 (-1.5 to 1.8)                   |
| Mali                                          | 15.2 (14.4 to 15.9)        | 15.2 (14.6 to 15.8)        | 15.2 (14.6 to 15.8)        | 15.2 (14.5 to 15.8)        | 0.0 (-0.1 to 0.1)                              | 0.1 (-1.2 to 1.3)                   |
| Mauritania                                    | 13.2 (11.2 to 15.3)        | 13.2 (11.2 to 15.3)        | 13.2 (11.2 to 15.3)        | 13.2 (11.2 to 15.3)        | -0.0 (-0.0 to 0.0)                             | -0.0 (-0.0 to 0.0)                  |
| Niger                                         | 13.1 (11.2 to 15.2)        | 13.1 (11.2 to 15.3)        | 13.1 (11.2 to 15.3)        | 13.1 (11.2 to 15.3)        | 0.0 (-0.0 to 0.0)                              | 0.0 (-0.1 to 0.2)                   |

|                                                                                                                               | Estimate in 2000 (95% UIs) | Estimate in 2015 (95% UIs) | Estimate in 2017 (95% UIs) | Estimate in 2030 (95% UIs) | Annualised rate of change, 2015-2030 (95% UIs) | Percent change, 2015-2030 (95% UIs) |
|-------------------------------------------------------------------------------------------------------------------------------|----------------------------|----------------------------|----------------------------|----------------------------|------------------------------------------------|-------------------------------------|
| Nigeria                                                                                                                       | 10.9 (10.3 to 11.4)        | 10.7 (10.2 to 11.2)        | 10.6 (10.1 to 11.2)        | 10.5 (9.9 to 11.1)         | -0.1 (-0.2 to 0.0)                             | -1.8 (-3.5 to 0.3)                  |
| San Tome and Principe                                                                                                         | 16.0 (15.2 to 16.7)        | 15.8 (15.1 to 16.5)        | 15.8 (15.1 to 16.6)        | 15.8 (15.0 to 16.6)        | 0.0 (-0.1 to 0.1)                              | 0.3 (-0.1 to 0.6)                   |
| Senegal                                                                                                                       | 13.1 (11.2 to 15.3)        | 13.2 (11.2 to 15.3)        | 13.2 (11.2 to 15.3)        | 13.1 (11.2 to 15.3)        | -0.0 (-0.0 to -0.0)                            | -0.2 (-0.3 to -0.1)                 |
| Sierra Leone                                                                                                                  | 20.6 (19.6 to 21.6)        | 20.5 (19.8 to 21.3)        | 20.5 (19.8 to 21.2)        | 20.5 (19.7 to 21.4)        | 0.0 (-0.1 to 0.1)                              | 0.1 (-0.9 to 1.2)                   |
| Togo                                                                                                                          | 9.8 (9.3 to 10.3)          | 9.9 (9.4 to 10.4)          | 9.9 (9.4 to 10.4)          | 9.9 (9.4 to 10.4)          | 0.0 (-0.0 to 0.1)                              | 0.3 (-0.4 to 1.1)                   |
| <b>Indicator 16.1.3c: Age-standardised prevalence of sexual violence experienced by populations in the past 12 months (%)</b> |                            |                            |                            |                            |                                                |                                     |
| <b>Central Europe, Eastern Europe, and Central Asia</b>                                                                       |                            |                            |                            |                            |                                                |                                     |
| <b>Central Asia</b>                                                                                                           |                            |                            |                            |                            |                                                |                                     |
| Armenia                                                                                                                       | 0.9 (0.8 to 1.1)           | 0.9 (0.8 to 1.1)           | 0.9 (0.8 to 1.1)           | 1.0 (0.8 to 1.1)           | 0.1 (-0.2 to 0.4)                              | 1.5 (-2.7 to 5.7)                   |
| Azerbaijan                                                                                                                    | 1.2 (1.1 to 1.4)           | 1.2 (1.0 to 1.4)           | 1.2 (1.0 to 1.4)           | 1.2 (1.0 to 1.4)           | 0.1 (-0.2 to 0.4)                              | 1.4 (-3.2 to 6.3)                   |
| Georgia                                                                                                                       | 0.9 (0.6 to 0.8)           | 0.8 (0.7 to 0.9)           | 0.8 (0.7 to 0.9)           | 0.8 (0.7 to 1.0)           | 0.7 (0.4 to 0.9)                               | 10.6 (6.0 to 15.3)                  |
| Kazakhstan                                                                                                                    | 0.9 (0.8 to 1.1)           | 1.0 (0.8 to 1.1)           | 1.0 (0.8 to 1.1)           | 1.0 (0.9 to 1.2)           | 0.4 (0.1 to 0.7)                               | 5.8 (1.1 to 10.5)                   |
| Kyrgyzstan                                                                                                                    | 1.3 (1.2 to 1.6)           | 1.3 (1.2 to 1.5)           | 1.3 (1.2 to 1.5)           | 1.3 (1.1 to 1.5)           | -0.2 (-0.5 to 0.1)                             | -2.9 (-7.1 to 1.5)                  |
| Mongolia                                                                                                                      | 1.0 (0.8 to 1.1)           | 1.1 (0.9 to 1.2)           | 1.1 (0.9 to 1.3)           | 1.2 (1.0 to 1.4)           | 0.5 (0.3 to 0.8)                               | 8.5 (4.1 to 12.8)                   |
| Tajikistan                                                                                                                    | 1.3 (1.1 to 1.5)           | 1.2 (1.1 to 1.4)           | 1.2 (1.1 to 1.4)           | 1.1 (1.0 to 1.3)           | -0.3 (-0.6 to 0.0)                             | -4.3 (-8.4 to 0.2)                  |
| Turkmenistan                                                                                                                  | 1.0 (0.8 to 1.1)           | 0.9 (0.8 to 1.1)           | 0.9 (0.8 to 1.1)           | 0.9 (0.8 to 1.1)           | 0.0 (-0.3 to 0.3)                              | 0.0 (-3.9 to 3.9)                   |
| Uzbekistan                                                                                                                    | 0.9 (0.8 to 1.1)           | 1.0 (0.9 to 1.2)           | 1.0 (0.9 to 1.2)           | 1.1 (0.9 to 1.2)           | 0.4 (0.1 to 0.6)                               | 5.6 (1.3 to 9.8)                    |
| <b>Central Europe</b>                                                                                                         |                            |                            |                            |                            |                                                |                                     |
| Albania                                                                                                                       | 0.9 (0.8 to 1.0)           | 1.0 (0.8 to 1.1)           | 1.0 (0.8 to 1.1)           | 1.0 (0.8 to 1.2)           | 0.2 (-0.1 to 0.4)                              | 2.3 (-1.9 to 6.4)                   |
| Bosnia and Herzegovina                                                                                                        | 1.3 (1.1 to 1.5)           | 1.3 (1.1 to 1.4)           | 1.3 (1.1 to 1.4)           | 1.3 (1.1 to 1.4)           | -0.1 (-0.4 to 0.2)                             | -1.1 (-5.2 to 2.7)                  |
| Bulgaria                                                                                                                      | 1.4 (1.2 to 1.7)           | 1.4 (1.2 to 1.7)           | 1.4 (1.2 to 1.7)           | 1.4 (1.2 to 1.7)           | -0.1 (-0.4 to 0.2)                             | -1.7 (-6.0 to 2.8)                  |
| Croatia                                                                                                                       | 1.6 (1.4 to 1.9)           | 1.3 (1.2 to 1.6)           | 1.3 (1.2 to 1.5)           | 1.2 (1.0 to 1.4)           | -0.7 (-1.0 to -0.4)                            | -10.0 (-13.7 to -6.2)               |
| Czech Republic                                                                                                                | 1.7 (1.4 to 2.0)           | 1.5 (1.3 to 1.8)           | 1.5 (1.3 to 1.8)           | 1.4 (1.2 to 1.7)           | -0.4 (-0.7 to -0.1)                            | -5.9 (-10.0 to -1.4)                |
| Hungary                                                                                                                       | 1.7 (1.4 to 1.9)           | 1.4 (1.2 to 1.6)           | 1.4 (1.2 to 1.6)           | 1.2 (1.0 to 1.4)           | -1.1 (-1.4 to -0.8)                            | -15.0 (-18.8 to -11.1)              |
| Macedonia                                                                                                                     | 1.0 (0.9 to 1.2)           | 0.9 (0.8 to 1.1)           | 0.9 (0.8 to 1.1)           | 0.9 (0.8 to 1.0)           | -0.3 (-0.6 to -0.1)                            | -4.7 (-8.3 to -0.8)                 |
| Montenegro                                                                                                                    | 1.1 (1.0 to 1.3)           | 1.2 (1.0 to 1.4)           | 1.2 (1.0 to 1.4)           | 1.2 (1.0 to 1.4)           | 0.2 (-0.0 to 0.5)                              | 3.3 (-0.7 to 7.5)                   |
| Poland                                                                                                                        | 1.2 (1.0 to 1.4)           | 1.2 (1.0 to 1.4)           | 1.2 (1.0 to 1.4)           | 1.2 (1.1 to 1.4)           | 0.1 (-0.1 to 0.4)                              | 2.1 (-2.0 to 6.1)                   |
| Romania                                                                                                                       | 1.4 (1.2 to 1.6)           | 1.4 (1.2 to 1.6)           | 1.4 (1.2 to 1.6)           | 1.4 (1.2 to 1.6)           | -0.1 (-0.3 to 0.2)                             | -0.8 (-4.9 to 3.4)                  |
| Serbia                                                                                                                        | 1.2 (1.0 to 1.4)           | 1.3 (1.1 to 1.5)           | 1.3 (1.1 to 1.5)           | 1.4 (1.2 to 1.6)           | 0.4 (0.1 to 0.6)                               | 5.7 (1.5 to 10.1)                   |
| Slovakia                                                                                                                      | 1.5 (1.3 to 1.8)           | 1.4 (1.2 to 1.6)           | 1.4 (1.2 to 1.6)           | 1.3 (1.1 to 1.5)           | -0.5 (-0.8 to -0.2)                            | -7.6 (-11.6 to -3.4)                |
| Slovenia                                                                                                                      | 1.4 (1.2 to 1.6)           | 1.2 (1.1 to 1.4)           | 1.2 (1.1 to 1.4)           | 1.1 (0.9 to 1.3)           | -0.8 (-1.1 to -0.5)                            | -10.7 (-14.6 to -6.6)               |
| <b>Eastern Europe</b>                                                                                                         |                            |                            |                            |                            |                                                |                                     |
| Belarus                                                                                                                       | 1.6 (1.4 to 1.9)           | 1.8 (1.5 to 2.0)           | 1.8 (1.5 to 2.1)           | 1.9 (1.6 to 2.2)           | 0.4 (0.1 to 0.6)                               | 5.6 (1.2 to 9.9)                    |
| Estonia                                                                                                                       | 1.4 (1.2 to 1.6)           | 1.9 (1.6 to 2.2)           | 1.9 (1.6 to 2.2)           | 2.2 (1.9 to 2.6)           | 1.2 (0.9 to 1.5)                               | 19.1 (13.8 to 24.5)                 |
| Latvia                                                                                                                        | 1.2 (1.1 to 1.4)           | 1.4 (1.2 to 1.6)           | 1.4 (1.2 to 1.6)           | 1.5 (1.3 to 1.8)           | 0.5 (0.2 to 0.8)                               | 7.9 (3.7 to 12.7)                   |
| Lithuania                                                                                                                     | 1.5 (1.3 to 1.7)           | 1.8 (1.6 to 2.1)           | 1.8 (1.6 to 2.1)           | 2.1 (1.8 to 2.4)           | 0.8 (0.6 to 1.2)                               | 13.6 (8.9 to 19.1)                  |
| Moldova                                                                                                                       | 1.4 (1.2 to 1.6)           | 1.3 (1.1 to 1.5)           | 1.3 (1.1 to 1.5)           | 1.3 (1.1 to 1.5)           | -0.2 (-0.6 to 0.3)                             | -2.4 (-8.1 to 4.1)                  |
| Russia                                                                                                                        | 1.4 (1.2 to 1.6)           | 1.6 (1.4 to 1.8)           | 1.6 (1.4 to 1.8)           | 1.7 (1.5 to 2.0)           | 0.5 (0.2 to 0.8)                               | 8.1 (3.3 to 12.7)                   |
| Ukraine                                                                                                                       | 1.4 (1.2 to 1.6)           | 1.6 (1.4 to 1.8)           | 1.6 (1.4 to 1.8)           | 1.7 (1.4 to 2.0)           | 0.5 (0.2 to 0.8)                               | 8.0 (3.5 to 12.7)                   |
| <b>High-income</b>                                                                                                            |                            |                            |                            |                            |                                                |                                     |
| <b>Australasia</b>                                                                                                            |                            |                            |                            |                            |                                                |                                     |
| Australia                                                                                                                     | 1.3 (1.1 to 1.5)           | 1.3 (1.1 to 1.5)           | 1.3 (1.1 to 1.5)           | 1.2 (1.0 to 1.4)           | -0.5 (-0.8 to -0.1)                            | -6.6 (-11.4 to -0.9)                |
| New Zealand                                                                                                                   | 1.5 (1.3 to 1.8)           | 1.6 (1.3 to 1.9)           | 1.5 (1.3 to 1.8)           | 1.5 (1.2 to 1.8)           | -0.3 (-0.7 to -0.0)                            | -5.0 (-9.5 to -0.4)                 |
| <b>High-income Asia Pacific</b>                                                                                               |                            |                            |                            |                            |                                                |                                     |
| Brunei                                                                                                                        | 0.8 (0.6 to 0.9)           | 0.7 (0.6 to 0.9)           | 0.7 (0.6 to 0.9)           | 0.7 (0.6 to 0.9)           | -0.1 (-0.4 to 0.3)                             | -1.1 (-5.7 to 3.9)                  |
| Japan                                                                                                                         | 1.0 (0.9 to 1.2)           | 1.0 (0.9 to 1.2)           | 1.0 (0.9 to 1.2)           | 1.0 (0.9 to 1.2)           | -0.1 (-0.1 to 0.0)                             | -1.0 (-2.0 to 0.0)                  |
| South Korea                                                                                                                   | 1.1 (0.9 to 1.3)           | 1.0 (0.8 to 1.2)           | 1.0 (0.8 to 1.2)           | 1.0 (0.8 to 1.1)           | -0.3 (-0.6 to 0.1)                             | -4.2 (-8.8 to 0.8)                  |
| Singapore                                                                                                                     | 0.8 (0.7 to 1.0)           | 0.8 (0.7 to 1.0)           | 0.8 (0.7 to 1.0)           | 0.8 (0.7 to 1.0)           | -0.0 (-0.4 to 0.3)                             | -0.4 (-5.4 to 4.5)                  |
| <b>High-income North America</b>                                                                                              |                            |                            |                            |                            |                                                |                                     |
| Canada                                                                                                                        | 1.4 (1.2 to 1.7)           | 1.4 (1.2 to 1.7)           | 1.4 (1.2 to 1.7)           | 1.4 (1.2 to 1.7)           | 0.0 (-0.3 to 0.4)                              | 0.8 (-4.7 to 6.6)                   |
| Greenland                                                                                                                     | 1.4 (1.2 to 1.7)           | 1.4 (1.2 to 1.7)           | 1.4 (1.2 to 1.7)           | 1.4 (1.2 to 1.8)           | 0.1 (-0.3 to 0.5)                              | 1.3 (-4.5 to 7.1)                   |
| United States                                                                                                                 | 1.6 (1.4 to 1.9)           | 1.6 (1.4 to 2.0)           | 1.6 (1.4 to 1.9)           | 1.7 (1.4 to 2.0)           | 0.0 (-0.1 to 0.2)                              | 0.4 (-2.2 to 3.0)                   |
| <b>Southern Latin America</b>                                                                                                 |                            |                            |                            |                            |                                                |                                     |
| Argentina                                                                                                                     | 1.3 (1.1 to 1.6)           | 1.3 (1.1 to 1.5)           | 1.3 (1.1 to 1.5)           | 1.2 (1.0 to 1.4)           | -0.5 (-0.8 to -0.1)                            | -6.7 (-11.4 to -2.0)                |
| Chile                                                                                                                         | 1.1 (0.9 to 1.3)           | 1.2 (1.0 to 1.4)           | 1.2 (1.0 to 1.4)           | 1.2 (1.0 to 1.4)           | 0.2 (-0.2 to 0.5)                              | 2.3 (-2.7 to 7.1)                   |
| Uruguay                                                                                                                       | 1.2 (1.0 to 1.4)           | 1.1 (0.9 to 1.3)           | 1.1 (0.9 to 1.3)           | 1.1 (0.9 to 1.3)           | -0.3 (-0.6 to 0.0)                             | -4.5 (-9.3 to 0.3)                  |
| <b>Western Europe</b>                                                                                                         |                            |                            |                            |                            |                                                |                                     |
| Andorra                                                                                                                       | 1.9 (1.6 to 2.2)           | 1.4 (1.2 to 1.7)           | 1.4 (1.2 to 1.6)           | 1.2 (1.0 to 1.4)           | -1.1 (-1.5 to -0.7)                            | -15.7 (-20.0 to -10.6)              |
| Austria                                                                                                                       | 1.4 (1.1 to 1.6)           | 1.2 (1.0 to 1.4)           | 1.2 (1.0 to 1.4)           | 1.1 (0.9 to 1.3)           | -0.5 (-0.8 to -0.2)                            | -7.2 (-11.5 to -2.4)                |
| Belgium                                                                                                                       | 1.1 (0.9 to 1.3)           | 1.2 (1.0 to 1.4)           | 1.2 (1.0 to 1.4)           | 1.3 (1.1 to 1.5)           | 0.2 (-0.1 to 0.6)                              | 3.4 (-1.6 to 8.8)                   |
| Cyprus                                                                                                                        | 1.6 (1.3 to 2.0)           | 1.5 (1.2 to 1.8)           | 1.5 (1.2 to 1.8)           | 1.4 (1.2 to 1.8)           | -0.2 (-0.6 to 0.1)                             | -3.1 (-8.2 to 2.0)                  |
| Denmark                                                                                                                       | 1.4 (1.1 to 1.6)           | 1.2 (1.0 to 1.4)           | 1.2 (1.0 to 1.4)           | 1.1 (0.9 to 1.3)           | -0.6 (-1.0 to -0.3)                            | -8.8 (-13.5 to -4.2)                |
| Finland                                                                                                                       | 1.3 (1.1 to 1.5)           | 1.2 (1.1 to 1.5)           | 1.2 (1.1 to 1.5)           | 1.2 (1.0 to 1.5)           | -0.2 (-0.5 to 0.2)                             | -2.5 (-7.4 to 2.4)                  |
| France                                                                                                                        | 1.7 (1.4 to 2.0)           | 1.4 (1.2 to 1.7)           | 1.4 (1.2 to 1.7)           | 1.3 (1.1 to 1.5)           | -0.9 (-1.3 to -0.6)                            | -13.0 (-17.2 to -8.6)               |
| Germany                                                                                                                       | 1.2 (1.0 to 1.4)           | 1.1 (0.9 to 1.3)           | 1.1 (0.9 to 1.3)           | 1.0 (0.8 to 1.2)           | -0.6 (-0.9 to -0.3)                            | -8.3 (-12.8 to -3.7)                |
| Greece                                                                                                                        | 1.4 (1.2 to 1.6)           | 1.3 (1.1 to 1.6)           | 1.3 (1.1 to 1.6)           | 1.2 (1.0 to 1.5)           | -0.3 (-0.7 to -0.0)                            | -5.1 (-10.0 to -0.6)                |
| Iceland                                                                                                                       | 1.0 (0.8 to 1.2)           | 1.1 (1.0 to 1.3)           | 1.1 (1.0 to 1.4)           | 1.2 (1.0 to 1.5)           | 0.6 (0.2 to 0.9)                               | 9.0 (3.6 to 14.4)                   |
| Ireland                                                                                                                       | 1.4 (1.2 to 1.7)           | 1.3 (1.1 to 1.6)           | 1.3 (1.1 to 1.6)           | 1.3 (1.1 to 1.6)           | -0.1 (-0.4 to 0.3)                             | -1.4 (-6.1 to 4.3)                  |
| Israel                                                                                                                        | 0.8 (0.7 to 0.9)           | 0.8 (0.7 to 1.0)           | 0.8 (0.7 to 1.0)           | 0.9 (0.7 to 1.1)           | 0.3 (-0.0 to 0.6)                              | 4.6 (-0.4 to 9.8)                   |
| Italy                                                                                                                         | 2.5 (2.1 to 2.9)           | 2.1 (1.8 to 2.4)           | 2.1 (1.8 to 2.4)           | 1.8 (1.5 to 2.2)           | -1.0 (-1.3 to -0.6)                            | -13.4 (-17.3 to -8.7)               |
| Luxembourg                                                                                                                    | 1.5 (1.2 to 1.8)           | 1.8 (1.5 to 2.2)           | 1.8 (1.5 to 2.2)           | 1.9 (1.5 to 2.3)           | 0.4 (0.0 to 0.7)                               | 5.8 (0.5 to 11.3)                   |
| Malta                                                                                                                         | 1.1 (0.9 to 1.4)           | 1.1 (0.9 to 1.4)           | 1.1 (0.9 to 1.4)           | 1.1 (0.9 to 1.4)           | 0.2 (-0.2 to 0.5)                              | 2.4 (-2.9 to 7.7)                   |
| Netherlands                                                                                                                   | 1.2 (1.0 to 1.4)           | 1.1 (0.9 to 1.3)           | 1.1 (0.9 to 1.3)           | 1.1 (0.9 to 1.3)           | -0.2 (-0.5 to 0.1)                             | -2.6 (-7.4 to 2.1)                  |
| Norway                                                                                                                        | 1.1 (0.9 to 1.2)           | 1.1 (0.9 to 1.3)           | 1.1 (0.9 to 1.3)           | 1.1 (0.9 to 1.3)           | 0.1 (-0.2 to 0.4)                              | 1.7 (-2.9 to 6.3)                   |
| Portugal                                                                                                                      | 1.6 (1.3 to 1.9)           | 1.4 (1.1 to 1.6)           | 1.4 (1.1 to 1.6)           | 1.4 (1.1 to 1.7)           | -0.9 (-1.2 to -0.5)                            | -12.2 (-16.6 to -7.6)               |
| Spain                                                                                                                         | 1.5 (1.2 to 1.8)           | 1.4 (1.2 to 1.8)           | 1.4 (1.2 to 1.8)           | 1.4 (1.1 to 1.7)           | -0.3 (-0.6 to 0.1)                             | -3.9 (-9.1 to 1.7)                  |
| Sweden                                                                                                                        | 1.7 (1.4 to 2.0)           | 1.6 (1.3 to 1.9)           | 1.6 (1.3 to 1.9)           | 1.6 (1.3 to 1.8)           | -0.2 (-0.5 to 0.0)                             | -3.1 (-6.7 to 0.4)                  |
| Switzerland                                                                                                                   | 1.3 (1.1 to 1.5)           | 1.2 (1.0 to 1.4)           | 1.2 (1.0 to 1.4)           | 1.1 (0.9 to 1.4)           | -0.4 (-0.7 to -0.1)                            | -5.8 (-10.6 to -1.2)                |
| United Kingdom                                                                                                                | 1.5 (1.2 to 1.7)           | 1.5 (1.3 to 1.8)           | 1.5 (1.3 to 1.8)           | 1.5 (1.3 to 1.8)           | -0.1 (-0.2 to -0.1)                            | -2.1 (-2.9 to -1.2)                 |
| <b>Latin America and Caribbean</b>                                                                                            |                            |                            |                            |                            |                                                |                                     |

|                                               | Estimate in 2000 (95% UIs) | Estimate in 2015 (95% UIs) | Estimate in 2017 (95% UIs) | Estimate in 2030 (95% UIs) | Annualised rate of change, 2015-2030 (95% UIs) | Percent change, 2015-2030 (95% UIs) |
|-----------------------------------------------|----------------------------|----------------------------|----------------------------|----------------------------|------------------------------------------------|-------------------------------------|
| <b>Andean Latin America</b>                   |                            |                            |                            |                            |                                                |                                     |
| Bolivia                                       | 2.2 (1.9 to 2.6)           | 2.2 (2.0 to 2.5)           | 2.2 (1.9 to 2.5)           | 2.2 (1.9 to 2.6)           | -0.1 (-0.6 to 0.4)                             | -0.9 (-8.0 to 6.1)                  |
| Ecuador                                       | 1.9 (1.7 to 2.1)           | 2.1 (1.8 to 2.4)           | 2.1 (1.8 to 2.4)           | 2.1 (1.8 to 2.5)           | 0.2 (-0.1 to 0.5)                              | 2.7 (-1.8 to 7.7)                   |
| Peru                                          | 1.7 (1.5 to 2.0)           | 1.4 (1.2 to 1.6)           | 1.4 (1.2 to 1.6)           | 1.4 (1.2 to 1.5)           | -0.7 (-1.0 to -0.4)                            | -9.4 (-13.4 to -5.5)                |
| <b>Caribbean</b>                              |                            |                            |                            |                            |                                                |                                     |
| Antigua and Barbuda                           | 1.9 (1.6 to 2.2)           | 2.0 (1.7 to 2.3)           | 2.0 (1.7 to 2.3)           | 2.0 (1.7 to 2.4)           | 0.2 (-0.1 to 0.4)                              | 2.4 (-1.8 to 6.9)                   |
| The Bahamas                                   | 2.8 (2.4 to 3.2)           | 2.5 (2.1 to 2.9)           | 2.5 (2.1 to 2.9)           | 2.2 (1.9 to 2.6)           | -0.7 (-0.9 to -0.4)                            | -9.6 (-13.3 to -5.7)                |
| Barbados                                      | 2.1 (1.8 to 2.5)           | 2.2 (1.9 to 2.5)           | 2.2 (1.9 to 2.5)           | 2.2 (1.9 to 2.5)           | 0.1 (-0.2 to 0.4)                              | 1.3 (-2.6 to 5.9)                   |
| Belize                                        | 2.2 (1.9 to 2.5)           | 2.4 (2.0 to 2.8)           | 2.4 (2.0 to 2.8)           | 2.5 (2.1 to 2.9)           | 0.2 (0.0 to 0.5)                               | 3.7 (0.0 to 7.6)                    |
| Bermuda                                       | 5.0 (4.3 to 5.8)           | 3.6 (3.1 to 4.2)           | 3.5 (3.0 to 4.1)           | 2.9 (2.5 to 3.3)           | -1.5 (-1.8 to -1.2)                            | -20.6 (-23.7 to -17.1)              |
| Cuba                                          | 1.8 (1.6 to 2.1)           | 1.9 (1.6 to 2.1)           | 1.9 (1.6 to 2.1)           | 1.9 (1.6 to 2.2)           | 0.2 (-0.1 to 0.5)                              | 2.9 (-0.9 to 7.1)                   |
| Dominica                                      | 2.4 (2.1 to 2.8)           | 2.3 (2.0 to 2.7)           | 2.3 (2.0 to 2.7)           | 2.2 (1.9 to 2.6)           | -0.2 (-0.5 to 0.1)                             | -3.0 (-6.8 to 1.0)                  |
| Dominican Republic                            | 1.8 (1.6 to 2.1)           | 1.9 (1.7 to 2.1)           | 1.9 (1.7 to 2.1)           | 1.9 (1.7 to 2.2)           | 0.2 (-0.1 to 0.5)                              | 3.5 (-0.9 to 7.9)                   |
| Grenada                                       | 2.6 (2.3 to 3.0)           | 2.3 (2.0 to 2.6)           | 2.3 (2.0 to 2.6)           | 2.1 (1.8 to 2.5)           | -0.6 (-0.8 to -0.3)                            | -8.3 (-11.9 to -4.6)                |
| Guyana                                        | 2.5 (2.2 to 2.9)           | 2.1 (1.8 to 2.4)           | 2.1 (1.8 to 2.4)           | 1.8 (1.5 to 2.1)           | -0.9 (-1.2 to -0.6)                            | -13.0 (-16.5 to -9.1)               |
| Haiti                                         | 3.5 (3.2 to 3.8)           | 3.6 (3.2 to 4.1)           | 3.6 (3.1 to 4.1)           | 3.7 (3.0 to 4.3)           | 0.0 (-0.4 to 0.5)                              | 0.7 (-5.7 to 7.4)                   |
| Jamaica                                       | 1.9 (1.6 to 2.2)           | 1.9 (1.6 to 2.2)           | 1.9 (1.6 to 2.2)           | 1.9 (1.6 to 2.2)           | 0.0 (-0.2 to 0.3)                              | 0.4 (-3.6 to 4.4)                   |
| Puerto Rico                                   | 1.9 (1.6 to 2.2)           | 1.8 (1.6 to 2.1)           | 1.9 (1.6 to 2.2)           | 1.9 (1.6 to 2.2)           | 0.2 (-0.1 to 0.5)                              | 3.3 (-1.0 to 7.6)                   |
| Saint Lucia                                   | 3.0 (2.6 to 3.4)           | 2.4 (2.0 to 2.8)           | 2.4 (2.0 to 2.8)           | 2.1 (1.8 to 2.4)           | -0.9 (-1.2 to -0.6)                            | -12.6 (-16.7 to -8.6)               |
| Saint Vincent and the Grenadines              | 2.0 (1.7 to 2.4)           | 2.0 (1.8 to 2.4)           | 2.0 (1.8 to 2.4)           | 2.1 (1.8 to 2.4)           | 0.1 (-0.2 to 0.3)                              | 1.0 (-3.3 to 5.4)                   |
| Suriname                                      | 2.0 (1.8 to 2.4)           | 2.2 (1.9 to 2.6)           | 2.2 (1.9 to 2.6)           | 2.4 (2.0 to 2.8)           | 0.4 (0.1 to 0.6)                               | 5.6 (1.3 to 10.0)                   |
| Trinidad and Tobago                           | 1.8 (1.5 to 2.1)           | 1.8 (1.6 to 2.1)           | 1.8 (1.6 to 2.1)           | 1.8 (1.6 to 2.1)           | 0.1 (-0.2 to 0.4)                              | 1.1 (-2.6 to 5.6)                   |
| Virgin Islands, U.S.                          | 2.0 (1.7 to 2.3)           | 2.0 (1.8 to 2.3)           | 2.0 (1.8 to 2.4)           | 2.1 (1.8 to 2.4)           | 0.2 (-0.1 to 0.5)                              | 2.8 (-1.4 to 7.1)                   |
| <b>Central Latin America</b>                  |                            |                            |                            |                            |                                                |                                     |
| Colombia                                      | 1.7 (1.5 to 2.0)           | 1.6 (1.4 to 1.8)           | 1.6 (1.4 to 1.8)           | 1.6 (1.3 to 1.8)           | 0.0 (-0.4 to 0.4)                              | 0.2 (-5.5 to 6.6)                   |
| Costa Rica                                    | 1.7 (1.5 to 2.0)           | 1.6 (1.4 to 1.9)           | 1.6 (1.4 to 1.9)           | 1.5 (1.3 to 1.8)           | -0.4 (-0.7 to -0.1)                            | -5.7 (-9.5 to -1.5)                 |
| El Salvador                                   | 1.2 (1.0 to 1.4)           | 1.3 (1.1 to 1.4)           | 1.3 (1.1 to 1.5)           | 1.3 (1.1 to 1.6)           | 0.3 (-0.1 to 0.7)                              | 5.2 (-0.9 to 11.6)                  |
| Guatemala                                     | 1.5 (1.3 to 1.6)           | 1.3 (1.2 to 1.5)           | 1.3 (1.2 to 1.5)           | 1.2 (1.0 to 1.4)           | -0.5 (-0.7 to -0.2)                            | -6.7 (-10.6 to -2.8)                |
| Honduras                                      | 1.9 (1.7 to 2.0)           | 1.7 (1.5 to 1.9)           | 1.7 (1.5 to 1.9)           | 1.6 (1.4 to 1.9)           | -0.4 (-0.8 to 0.2)                             | -5.1 (-11.9 to 3.6)                 |
| Mexico                                        | 2.9 (2.5 to 3.3)           | 2.2 (1.9 to 2.5)           | 2.1 (1.9 to 2.5)           | 1.8 (1.6 to 2.1)           | -1.3 (-1.4 to -1.2)                            | -17.7 (-19.1 to -16.1)              |
| Nicaragua                                     | 1.5 (1.3 to 1.7)           | 1.5 (1.3 to 1.7)           | 1.5 (1.3 to 1.7)           | 1.5 (1.2 to 1.7)           | 0.0 (-0.4 to 0.5)                              | 0.3 (-6.2 to 7.2)                   |
| Panama                                        | 1.8 (1.5 to 2.0)           | 1.8 (1.6 to 2.0)           | 1.8 (1.6 to 2.0)           | 1.8 (1.6 to 2.1)           | 0.2 (-0.1 to 0.5)                              | 2.9 (-1.5 to 7.1)                   |
| Venezuela                                     | 2.1 (1.8 to 2.5)           | 1.9 (1.7 to 2.2)           | 1.9 (1.7 to 2.2)           | 1.8 (1.5 to 2.1)           | -0.5 (-0.8 to -0.2)                            | -7.3 (-11.3 to -3.4)                |
| <b>Tropical Latin America</b>                 |                            |                            |                            |                            |                                                |                                     |
| Brazil                                        | 1.9 (1.6 to 2.2)           | 1.8 (1.5 to 2.0)           | 1.8 (1.5 to 2.0)           | 1.7 (1.5 to 2.0)           | -0.2 (-0.2 to -0.1)                            | -2.3 (-3.5 to -1.2)                 |
| Paraguay                                      | 1.9 (1.6 to 2.1)           | 1.6 (1.4 to 1.9)           | 1.7 (1.4 to 2.0)           | 1.6 (1.4 to 1.9)           | -0.1 (-0.5 to 0.3)                             | -1.0 (-6.8 to 4.9)                  |
| <b>North Africa and Middle East</b>           |                            |                            |                            |                            |                                                |                                     |
| <b>North Africa and Middle East</b>           |                            |                            |                            |                            |                                                |                                     |
| Afghanistan                                   | 1.4 (1.2 to 1.6)           | 1.4 (1.3 to 1.6)           | 1.4 (1.3 to 1.6)           | 1.4 (1.3 to 1.6)           | 0.1 (-0.2 to 0.4)                              | 1.4 (-3.4 to 6.2)                   |
| Algeria                                       | 1.4 (1.2 to 1.7)           | 1.5 (1.2 to 1.7)           | 1.5 (1.2 to 1.7)           | 1.5 (1.2 to 1.7)           | 0.0 (-0.3 to 0.3)                              | 0.1 (-4.3 to 4.1)                   |
| Bahrain                                       | 1.6 (1.4 to 1.9)           | 1.5 (1.3 to 1.8)           | 1.5 (1.3 to 1.8)           | 1.4 (1.2 to 1.7)           | -0.3 (-0.6 to -0.1)                            | -4.8 (-8.6 to -0.8)                 |
| Egypt                                         | 1.2 (1.1 to 1.4)           | 1.2 (1.0 to 1.3)           | 1.2 (1.0 to 1.3)           | 1.1 (1.0 to 1.3)           | -0.2 (-0.4 to 0.1)                             | -2.4 (-6.3 to 1.9)                  |
| Iran                                          | 1.4 (1.2 to 1.6)           | 1.4 (1.2 to 1.6)           | 1.4 (1.2 to 1.6)           | 1.4 (1.2 to 1.7)           | 0.0 (-0.2 to 0.3)                              | 0.7 (-3.4 to 4.6)                   |
| Iraq                                          | 1.4 (1.2 to 1.7)           | 1.4 (1.2 to 1.7)           | 1.4 (1.2 to 1.7)           | 1.4 (1.2 to 1.7)           | -0.1 (-0.3 to 0.2)                             | -0.8 (-4.8 to 3.5)                  |
| Jordan                                        | 1.6 (1.3 to 1.8)           | 1.6 (1.4 to 1.8)           | 1.6 (1.4 to 1.8)           | 1.6 (1.4 to 1.8)           | 0.0 (-0.2 to 0.3)                              | 0.7 (-3.4 to 4.8)                   |
| Kuwait                                        | 1.3 (1.1 to 1.5)           | 1.4 (1.2 to 1.6)           | 1.4 (1.2 to 1.6)           | 1.4 (1.2 to 1.6)           | 0.0 (-0.2 to 0.3)                              | 0.6 (-3.6 to 4.7)                   |
| Lebanon                                       | 1.6 (1.4 to 1.9)           | 1.6 (1.4 to 1.8)           | 1.6 (1.4 to 1.9)           | 1.6 (1.3 to 1.8)           | -0.1 (-0.4 to 0.2)                             | -1.4 (-5.5 to 2.4)                  |
| Libya                                         | 1.4 (1.2 to 1.6)           | 1.4 (1.2 to 1.6)           | 1.4 (1.2 to 1.6)           | 1.4 (1.2 to 1.6)           | 0.0 (-0.2 to 0.3)                              | 0.3 (-3.7 to 4.3)                   |
| Morocco                                       | 1.5 (1.3 to 1.8)           | 1.4 (1.2 to 1.7)           | 1.4 (1.2 to 1.7)           | 1.4 (1.2 to 1.7)           | -0.2 (-0.4 to 0.1)                             | -2.7 (-6.4 to 1.3)                  |
| Palestine                                     | 1.4 (1.2 to 1.6)           | 1.4 (1.2 to 1.6)           | 1.4 (1.2 to 1.6)           | 1.4 (1.2 to 1.6)           | 0.0 (-0.3 to 0.3)                              | 0.1 (-3.9 to 3.9)                   |
| Oman                                          | 1.4 (1.2 to 1.6)           | 1.4 (1.2 to 1.6)           | 1.4 (1.2 to 1.6)           | 1.4 (1.2 to 1.6)           | 0.0 (-0.2 to 0.3)                              | 0.2 (-3.5 to 4.0)                   |
| Qatar                                         | 1.4 (1.2 to 1.6)           | 1.4 (1.2 to 1.6)           | 1.4 (1.2 to 1.6)           | 1.4 (1.2 to 1.6)           | 0.3 (0.0 to 0.6)                               | 4.4 (0.4 to 8.7)                    |
| Saudi Arabia                                  | 1.4 (1.2 to 1.6)           | 1.4 (1.2 to 1.6)           | 1.4 (1.2 to 1.6)           | 1.4 (1.2 to 1.6)           | 0.0 (-0.2 to 0.3)                              | 0.5 (-3.5 to 5.0)                   |
| Sudan                                         | 1.7 (1.4 to 2.0)           | 1.7 (1.4 to 1.9)           | 1.7 (1.4 to 2.0)           | 1.7 (1.4 to 2.0)           | 0.0 (-0.2 to 0.3)                              | 0.4 (-3.6 to 4.4)                   |
| Syria                                         | 1.4 (1.2 to 1.7)           | 1.4 (1.2 to 1.7)           | 1.4 (1.2 to 1.7)           | 1.4 (1.2 to 1.7)           | -0.0 (-0.3 to 0.3)                             | -0.0 (-4.1 to 3.9)                  |
| Tunisia                                       | 1.5 (1.3 to 1.7)           | 1.5 (1.3 to 1.7)           | 1.5 (1.3 to 1.7)           | 1.5 (1.3 to 1.7)           | -0.0 (-0.3 to 0.3)                             | -0.1 (-4.0 to 4.0)                  |
| Turkey                                        | 1.8 (1.6 to 2.1)           | 1.6 (1.4 to 1.9)           | 1.6 (1.4 to 1.9)           | 1.5 (1.3 to 1.7)           | -0.8 (-1.2 to -0.4)                            | -10.8 (-16.2 to -5.1)               |
| United Arab Emirates                          | 1.6 (1.4 to 1.9)           | 1.5 (1.3 to 1.8)           | 1.6 (1.3 to 1.8)           | 1.5 (1.3 to 1.8)           | -0.1 (-0.4 to 0.2)                             | -1.6 (-5.8 to 2.9)                  |
| Yemen                                         | 1.4 (1.2 to 1.7)           | 1.4 (1.2 to 1.6)           | 1.4 (1.2 to 1.6)           | 1.4 (1.2 to 1.6)           | -0.1 (-0.3 to 0.2)                             | -1.4 (-5.1 to 2.7)                  |
| <b>South Asia</b>                             |                            |                            |                            |                            |                                                |                                     |
| <b>South Asia</b>                             |                            |                            |                            |                            |                                                |                                     |
| Bangladesh                                    | 2.5 (2.1 to 2.9)           | 2.5 (2.2 to 2.9)           | 2.5 (2.2 to 3.0)           | 2.6 (2.2 to 3.0)           | 0.1 (-0.3 to 0.4)                              | 0.8 (-4.3 to 5.9)                   |
| Bhutan                                        | 3.0 (2.6 to 3.6)           | 2.7 (2.4 to 3.2)           | 2.8 (2.4 to 3.2)           | 2.7 (2.3 to 3.1)           | -0.2 (-0.4 to 0.1)                             | -2.4 (-6.4 to 1.9)                  |
| India                                         | 2.6 (2.3 to 3.0)           | 2.7 (2.3 to 3.2)           | 2.8 (2.4 to 3.3)           | 2.9 (2.4 to 3.5)           | 0.4 (0.1 to 0.6)                               | 6.0 (2.2 to 9.6)                    |
| Nepal                                         | 3.3 (2.8 to 3.8)           | 3.6 (3.1 to 4.1)           | 3.5 (3.0 to 4.1)           | 3.6 (3.0 to 4.3)           | 0.1 (-0.3 to 0.4)                              | 0.9 (-3.8 to 5.9)                   |
| Pakistan                                      | 2.5 (2.1 to 2.9)           | 2.5 (2.2 to 3.0)           | 2.6 (2.2 to 3.0)           | 2.6 (2.2 to 3.0)           | 0.1 (-0.2 to 0.4)                              | 1.3 (-2.6 to 5.7)                   |
| <b>Southeast Asia, East Asia, and Oceania</b> |                            |                            |                            |                            |                                                |                                     |
| <b>East Asia</b>                              |                            |                            |                            |                            |                                                |                                     |
| China                                         | 7.9 (6.9 to 9.0)           | 8.0 (7.0 to 9.1)           | 8.1 (7.1 to 9.2)           | 8.2 (7.2 to 9.4)           | 0.2 (0.1 to 0.3)                               | 3.2 (2.3 to 4.1)                    |
| North Korea                                   | 6.4 (5.5 to 7.4)           | 5.8 (5.0 to 6.7)           | 5.8 (5.0 to 6.7)           | 5.6 (4.8 to 6.5)           | -0.2 (-0.5 to 0.1)                             | -2.8 (-6.8 to 1.2)                  |
| Taiwan (Province of China)                    | 6.7 (5.8 to 7.7)           | 6.6 (5.7 to 7.6)           | 6.6 (5.7 to 7.6)           | 6.6 (5.6 to 7.6)           | -0.1 (-0.3 to 0.2)                             | -0.8 (-4.5 to 3.2)                  |
| <b>Oceania</b>                                |                            |                            |                            |                            |                                                |                                     |
| American Samoa                                | 3.5 (3.0 to 4.0)           | 3.5 (3.0 to 4.1)           | 3.5 (3.0 to 4.1)           | 3.6 (3.0 to 4.2)           | 0.1 (-0.2 to 0.4)                              | 1.3 (-2.8 to 5.8)                   |
| Federated States of Micronesia                | 3.4 (2.9 to 3.9)           | 3.2 (2.8 to 3.7)           | 3.2 (2.7 to 3.7)           | 3.1 (2.6 to 3.6)           | -0.2 (-0.5 to 0.1)                             | -3.1 (-7.5 to 1.4)                  |
| Fiji                                          | 3.2 (2.8 to 3.8)           | 3.4 (2.9 to 3.9)           | 3.4 (2.9 to 4.0)           | 3.5 (3.0 to 4.1)           | 0.2 (-0.0 to 0.5)                              | 3.6 (-0.5 to 7.8)                   |
| Guam                                          | 3.5 (3.0 to 4.1)           | 3.5 (3.0 to 4.1)           | 3.5 (3.0 to 4.1)           | 3.6 (3.0 to 4.2)           | 0.1 (-0.2 to 0.4)                              | 1.5 (-2.8 to 5.7)                   |
| Kiribati                                      | 4.9 (4.3 to 5.7)           | 4.9 (4.3 to 5.7)           | 4.9 (4.2 to 5.7)           | 4.8 (4.1 to 5.6)           | -0.1 (-0.4 to 0.1)                             | -1.9 (-6.0 to 2.1)                  |
| Marshall Islands                              | 3.4 (2.9 to 3.9)           | 3.4 (2.9 to 3.9)           | 3.4 (2.9 to 3.9)           | 3.4 (2.9 to 4.0)           | 0.1 (-0.2 to 0.4)                              | 1.7 (-2.7 to 6.2)                   |
| Northern Mariana Islands                      | 3.7 (3.2 to 4.3)           | 3.5 (3.0 to 4.0)           | 3.4 (2.9 to 4.0)           | 3.4 (2.9 to 4.0)           | -0.1 (-0.4 to 0.2)                             | -1.5 (-5.9 to 2.6)                  |
| Papua New Guinea                              | 3.5 (3.0 to 4.1)           | 3.5 (2.9 to 3.9)           | 3.5 (2.9 to 3.9)           | 3.2 (2.8 to 3.8)           | -0.2 (-0.5 to 0.1)                             | -2.6 (-6.7 to 1.8)                  |

|                                                                                                                                      | Estimate in 2000 (95% UIs) | Estimate in 2015 (95% UIs) | Estimate in 2017 (95% UIs) | Estimate in 2020 (95% UIs) | Annualised rate of change, 2015-2020 (95% UIs) | Percent change, 2015-2020 (95% UIs) |
|--------------------------------------------------------------------------------------------------------------------------------------|----------------------------|----------------------------|----------------------------|----------------------------|------------------------------------------------|-------------------------------------|
| Samoa                                                                                                                                | 2.7 (2.4 to 3.2)           | 2.8 (2.4 to 3.2)           | 2.8 (2.4 to 3.2)           | 2.8 (2.3 to 3.3)           | 0.1 (-0.2 to 0.3)                              | 0.9 (-3.3 to 5.4)                   |
| Solomon Islands                                                                                                                      | 3.0 (2.6 to 3.5)           | 3.1 (2.7 to 3.6)           | 3.1 (2.7 to 3.6)           | 3.2 (2.7 to 3.8)           | 0.2 (-0.1 to 0.5)                              | 3.0 (-1.2 to 7.2)                   |
| Tonga                                                                                                                                | 2.9 (2.4 to 3.3)           | 2.9 (2.5 to 3.4)           | 2.9 (2.5 to 3.3)           | 2.9 (2.4 to 3.4)           | -0.1 (-0.4 to 0.2)                             | -1.1 (-5.1 to 3.1)                  |
| Vanuatu                                                                                                                              | 3.1 (2.7 to 3.6)           | 3.0 (2.6 to 3.5)           | 3.0 (2.6 to 3.5)           | 3.0 (2.6 to 3.5)           | -0.1 (-0.3 to 0.2)                             | -1.3 (-5.1 to 3.1)                  |
| <b>Southeast Asia</b>                                                                                                                |                            |                            |                            |                            |                                                |                                     |
| Cambodia                                                                                                                             | 1.4 (1.2 to 1.6)           | 1.7 (1.5 to 1.9)           | 1.7 (1.5 to 1.9)           | 1.9 (1.6 to 2.2)           | 0.8 (0.4 to 1.1)                               | 12.0 (6.6 to 18.8)                  |
| Indonesia                                                                                                                            | 1.4 (1.2 to 1.6)           | 1.4 (1.2 to 1.6)           | 1.4 (1.2 to 1.6)           | 1.4 (1.2 to 1.6)           | 0.0 (-0.0 to 0.1)                              | 0.6 (-0.7 to 1.8)                   |
| Laos                                                                                                                                 | 1.9 (1.6 to 2.1)           | 1.8 (1.5 to 2.1)           | 1.8 (1.6 to 2.1)           | 1.8 (1.5 to 2.1)           | -0.0 (-0.3 to 0.2)                             | -0.6 (-4.6 to 3.0)                  |
| Malaysia                                                                                                                             | 1.4 (1.2 to 1.6)           | 1.4 (1.2 to 1.6)           | 1.4 (1.2 to 1.6)           | 1.4 (1.2 to 1.6)           | 0.0 (-0.2 to 0.3)                              | 0.4 (-3.2 to 4.5)                   |
| Maldives                                                                                                                             | 1.5 (1.3 to 1.7)           | 1.4 (1.2 to 1.6)           | 1.4 (1.2 to 1.6)           | 1.4 (1.2 to 1.6)           | -0.2 (-0.4 to 0.1)                             | -2.5 (-6.5 to 1.8)                  |
| Mauritius                                                                                                                            | 1.7 (1.4 to 1.9)           | 1.6 (1.4 to 1.9)           | 1.6 (1.4 to 1.9)           | 1.6 (1.3 to 1.8)           | -0.2 (-0.5 to 0.1)                             | -2.9 (-6.5 to 0.8)                  |
| Myanmar                                                                                                                              | 1.3 (1.1 to 1.5)           | 1.2 (1.1 to 1.4)           | 1.2 (1.1 to 1.4)           | 1.2 (1.1 to 1.4)           | -0.0 (-0.3 to 0.3)                             | -0.4 (-4.6 to 3.9)                  |
| Philippines                                                                                                                          | 2.1 (1.8 to 2.4)           | 2.0 (1.7 to 2.3)           | 2.0 (1.7 to 2.3)           | 2.0 (1.7 to 2.3)           | -0.0 (-0.3 to 0.3)                             | -0.2 (-5.0 to 4.9)                  |
| Sri Lanka                                                                                                                            | 1.4 (1.2 to 1.6)           | 1.5 (1.3 to 1.8)           | 1.5 (1.3 to 1.8)           | 1.7 (1.4 to 2.0)           | 0.5 (0.3 to 0.8)                               | 8.5 (4.2 to 13.1)                   |
| Seychelles                                                                                                                           | 1.9 (1.6 to 2.2)           | 1.7 (1.5 to 2.0)           | 1.7 (1.5 to 2.0)           | 1.7 (1.4 to 2.0)           | -0.2 (-0.5 to 0.1)                             | -2.8 (-6.7 to 1.2)                  |
| Thailand                                                                                                                             | 1.9 (1.7 to 2.2)           | 1.9 (1.6 to 2.2)           | 1.9 (1.6 to 2.2)           | 1.9 (1.6 to 2.2)           | -0.1 (-0.4 to 0.2)                             | -1.6 (-5.4 to 2.5)                  |
| Timor-Leste                                                                                                                          | 1.3 (1.1 to 1.6)           | 1.3 (1.1 to 1.5)           | 1.4 (1.2 to 1.6)           | 1.4 (1.2 to 1.6)           | 0.2 (-0.0 to 0.5)                              | 3.7 (-0.4 to 8.3)                   |
| Vietnam                                                                                                                              | 1.6 (1.3 to 1.8)           | 1.8 (1.6 to 2.1)           | 1.8 (1.6 to 2.1)           | 2.1 (1.8 to 2.4)           | 0.8 (0.5 to 1.1)                               | 12.4 (7.4 to 17.3)                  |
| <b>Sub-Saharan Africa</b>                                                                                                            |                            |                            |                            |                            |                                                |                                     |
| <b>Central Sub-Saharan Africa</b>                                                                                                    |                            |                            |                            |                            |                                                |                                     |
| Angola                                                                                                                               | 3.0 (2.6 to 3.5)           | 4.0 (3.5 to 4.6)           | 4.0 (3.5 to 4.7)           | 4.7 (4.0 to 5.5)           | 1.1 (0.8 to 1.4)                               | 18.0 (13.0 to 23.3)                 |
| Central African Republic                                                                                                             | 2.4 (2.1 to 2.8)           | 2.4 (2.0 to 2.7)           | 2.4 (2.0 to 2.7)           | 2.5 (2.1 to 2.9)           | 0.3 (-0.0 to 0.6)                              | 4.1 (-0.5 to 9.8)                   |
| Congo                                                                                                                                | 3.3 (2.8 to 3.8)           | 3.5 (3.0 to 4.0)           | 3.5 (3.0 to 4.1)           | 3.7 (3.1 to 4.4)           | 0.4 (0.1 to 0.7)                               | 6.1 (1.8 to 10.7)                   |
| Democratic Republic of the Congo                                                                                                     | 4.4 (3.8 to 5.1)           | 5.2 (4.5 to 5.8)           | 5.2 (4.5 to 5.8)           | 5.7 (4.9 to 6.7)           | 0.6 (0.3 to 0.9)                               | 9.4 (4.1 to 14.7)                   |
| Equatorial Guinea                                                                                                                    | 4.0 (3.5 to 4.7)           | 4.9 (4.2 to 5.7)           | 4.9 (4.2 to 5.7)           | 5.8 (4.9 to 6.7)           | 1.1 (0.8 to 1.4)                               | 17.4 (12.2 to 22.7)                 |
| Gabon                                                                                                                                | 3.6 (3.1 to 4.2)           | 3.7 (3.2 to 4.2)           | 3.7 (3.2 to 4.3)           | 3.7 (3.3 to 4.3)           | 0.1 (-0.2 to 0.4)                              | 1.6 (-2.9 to 6.1)                   |
| <b>Eastern Sub-Saharan Africa</b>                                                                                                    |                            |                            |                            |                            |                                                |                                     |
| Burundi                                                                                                                              | 5.3 (4.6 to 6.2)           | 4.9 (4.3 to 5.7)           | 4.9 (4.3 to 5.8)           | 4.7 (4.0 to 5.6)           | -0.3 (-0.5 to -0.0)                            | -4.1 (-7.5 to -0.1)                 |
| Comoros                                                                                                                              | 1.4 (1.2 to 1.6)           | 1.4 (1.2 to 1.6)           | 1.4 (1.2 to 1.6)           | 1.4 (1.2 to 1.6)           | -0.1 (-0.4 to 0.2)                             | -1.3 (-5.2 to 2.8)                  |
| Djibouti                                                                                                                             | 2.4 (2.1 to 2.8)           | 2.5 (2.1 to 2.9)           | 2.5 (2.1 to 2.9)           | 2.5 (2.1 to 3.0)           | 0.1 (-0.2 to 0.3)                              | 0.8 (-3.4 to 5.1)                   |
| Eritrea                                                                                                                              | 2.8 (2.4 to 3.2)           | 2.6 (2.3 to 3.1)           | 2.6 (2.3 to 3.1)           | 2.6 (2.2 to 3.1)           | -0.1 (-0.4 to 0.2)                             | -1.0 (-5.2 to 3.5)                  |
| Ethiopia                                                                                                                             | 3.3 (2.8 to 3.8)           | 3.3 (2.8 to 3.8)           | 3.3 (2.8 to 3.8)           | 3.3 (2.8 to 3.9)           | 0.1 (-0.2 to 0.4)                              | 1.1 (-3.2 to 5.6)                   |
| Kenya                                                                                                                                | 3.4 (3.0 to 4.0)           | 3.7 (3.2 to 4.3)           | 3.6 (3.1 to 4.2)           | 3.6 (3.1 to 4.2)           | -0.1 (-0.2 to -0.1)                            | -2.1 (-3.5 to -0.8)                 |
| Madagascar                                                                                                                           | 2.7 (2.3 to 3.2)           | 2.7 (2.3 to 3.1)           | 2.7 (2.3 to 3.1)           | 2.7 (2.3 to 3.2)           | 0.0 (-0.2 to 0.3)                              | 0.4 (-3.6 to 4.5)                   |
| Malawi                                                                                                                               | 4.5 (4.0 to 5.0)           | 4.8 (4.3 to 5.2)           | 4.8 (4.3 to 5.4)           | 5.2 (4.3 to 5.8)           | 0.5 (-0.0 to 0.9)                              | 7.9 (-0.4 to 14.7)                  |
| Mozambique                                                                                                                           | 3.0 (2.5 to 3.4)           | 3.0 (2.7 to 3.4)           | 3.1 (2.6 to 3.6)           | 3.2 (2.7 to 3.7)           | 0.3 (-0.0 to 0.7)                              | 5.0 (-0.3 to 10.5)                  |
| Rwanda                                                                                                                               | 3.4 (3.0 to 3.8)           | 3.3 (3.0 to 3.7)           | 3.3 (2.9 to 3.7)           | 3.2 (2.7 to 3.7)           | -0.2 (-0.6 to 0.2)                             | -2.6 (-9.3 to 3.6)                  |
| Somalia                                                                                                                              | 2.4 (2.1 to 2.8)           | 2.5 (2.1 to 2.9)           | 2.5 (2.1 to 2.9)           | 2.5 (2.1 to 2.9)           | 0.1 (-0.2 to 0.4)                              | 1.1 (-2.8 to 5.6)                   |
| South Sudan                                                                                                                          | 2.5 (2.1 to 2.9)           | 2.5 (2.2 to 3.0)           | 2.6 (2.2 to 3.0)           | 2.6 (2.2 to 3.0)           | 0.1 (-0.2 to 0.3)                              | 1.1 (-3.1 to 5.4)                   |
| Tanzania                                                                                                                             | 3.9 (3.3 to 4.5)           | 3.8 (3.5 to 4.2)           | 3.8 (3.4 to 4.2)           | 3.8 (3.3 to 4.1)           | -0.3 (-0.6 to -0.1)                            | -5.1 (-9.1 to -0.8)                 |
| Uganda                                                                                                                               | 5.7 (4.9 to 6.6)           | 5.7 (5.1 to 6.3)           | 5.0 (4.3 to 5.8)           | 4.6 (4.0 to 5.3)           | -1.4 (-1.8 to -1.0)                            | -18.5 (-23.1 to -14.1)              |
| Zambia                                                                                                                               | 3.8 (3.4 to 4.2)           | 4.1 (3.7 to 4.5)           | 4.1 (3.7 to 4.6)           | 4.4 (3.8 to 4.9)           | 0.5 (0.1 to 0.9)                               | 7.3 (1.2 to 14.0)                   |
| <b>Southern Sub-Saharan Africa</b>                                                                                                   |                            |                            |                            |                            |                                                |                                     |
| Botswana                                                                                                                             | 2.1 (1.8 to 2.4)           | 2.0 (1.8 to 2.3)           | 2.0 (1.8 to 2.3)           | 2.0 (1.8 to 2.3)           | -0.0 (-0.3 to 0.3)                             | -0.1 (-4.6 to 4.3)                  |
| Lesotho                                                                                                                              | 2.2 (1.9 to 2.5)           | 2.2 (1.9 to 2.5)           | 2.2 (1.9 to 2.5)           | 2.2 (1.9 to 2.6)           | 0.1 (-0.2 to 0.4)                              | 2.0 (-2.3 to 6.7)                   |
| Namibia                                                                                                                              | 1.7 (1.5 to 2.0)           | 2.1 (1.9 to 2.4)           | 2.1 (1.9 to 2.4)           | 2.4 (2.1 to 2.8)           | 0.8 (0.5 to 1.1)                               | 12.7 (7.3 to 18.1)                  |
| South Africa                                                                                                                         | 1.8 (1.6 to 2.1)           | 1.7 (1.5 to 2.0)           | 1.8 (1.5 to 2.0)           | 1.8 (1.5 to 2.0)           | 0.0 (-0.1 to 0.2)                              | 0.7 (-1.0 to 2.5)                   |
| Swaziland                                                                                                                            | 2.6 (2.3 to 3.0)           | 2.1 (1.8 to 2.4)           | 2.1 (1.8 to 2.4)           | 1.9 (1.6 to 2.3)           | -0.6 (-0.9 to -0.3)                            | -8.8 (-12.8 to -4.6)                |
| Zimbabwe                                                                                                                             | 4.4 (4.0 to 4.9)           | 4.4 (4.0 to 4.8)           | 4.3 (3.9 to 4.8)           | 4.2 (3.7 to 4.8)           | -0.3 (-0.5 to 0.1)                             | -3.7 (-7.7 to 1.7)                  |
| <b>Western Sub-Saharan Africa</b>                                                                                                    |                            |                            |                            |                            |                                                |                                     |
| Benin                                                                                                                                | 1.7 (1.5 to 2.0)           | 1.8 (1.5 to 2.0)           | 1.8 (1.5 to 2.0)           | 1.8 (1.5 to 2.1)           | 0.0 (-0.2 to 0.3)                              | 0.8 (-3.1 to 4.7)                   |
| Burkina Faso                                                                                                                         | 1.6 (1.3 to 1.7)           | 1.3 (1.1 to 1.5)           | 1.3 (1.1 to 1.5)           | 1.3 (1.1 to 1.5)           | -0.1 (-0.4 to 0.1)                             | -1.9 (-5.8 to 1.9)                  |
| Cameroon                                                                                                                             | 2.5 (2.3 to 2.7)           | 2.7 (2.3 to 3.1)           | 2.7 (2.3 to 3.1)           | 2.8 (2.4 to 3.3)           | 0.2 (-0.0 to 0.6)                              | 3.8 (-0.6 to 8.9)                   |
| Cape Verde                                                                                                                           | 2.7 (2.3 to 3.1)           | 2.5 (2.2 to 2.9)           | 2.5 (2.2 to 2.9)           | 2.4 (2.1 to 2.8)           | -0.3 (-0.5 to 0.0)                             | -3.8 (-7.6 to 0.3)                  |
| Chad                                                                                                                                 | 2.6 (2.2 to 3.0)           | 2.7 (2.4 to 3.0)           | 2.7 (2.4 to 3.0)           | 2.8 (2.4 to 3.1)           | 0.1 (-0.2 to 0.4)                              | 1.5 (-2.9 to 6.4)                   |
| Cote d'Ivoire                                                                                                                        | 1.9 (1.6 to 2.2)           | 1.8 (1.5 to 2.0)           | 1.7 (1.5 to 2.0)           | 1.7 (1.5 to 1.9)           | -0.2 (-0.5 to 0.0)                             | -3.7 (-7.4 to 0.5)                  |
| The Gambia                                                                                                                           | 1.4 (1.2 to 1.6)           | 1.3 (1.1 to 1.5)           | 1.3 (1.1 to 1.5)           | 1.3 (1.1 to 1.5)           | -0.2 (-0.5 to 0.1)                             | -2.8 (-7.0 to 1.1)                  |
| Ghana                                                                                                                                | 2.2 (1.9 to 2.6)           | 2.4 (2.1 to 2.7)           | 2.4 (2.1 to 2.8)           | 2.6 (2.2 to 3.0)           | 0.5 (0.1 to 0.8)                               | 7.2 (2.1 to 12.5)                   |
| Guinea                                                                                                                               | 1.6 (1.4 to 1.9)           | 1.6 (1.4 to 1.9)           | 1.6 (1.4 to 1.9)           | 1.7 (1.4 to 2.0)           | 0.1 (-0.2 to 0.4)                              | 2.1 (-2.7 to 6.7)                   |
| Guinea-Bissau                                                                                                                        | 2.0 (1.7 to 2.3)           | 1.9 (1.7 to 2.3)           | 1.9 (1.7 to 2.3)           | 1.9 (1.6 to 2.3)           | -0.1 (-0.3 to 0.2)                             | -1.0 (-4.6 to 2.9)                  |
| Liberia                                                                                                                              | 2.8 (2.4 to 3.3)           | 2.6 (2.3 to 3.0)           | 2.6 (2.2 to 3.0)           | 2.6 (2.0 to 2.8)           | -0.7 (-1.0 to -0.3)                            | -9.7 (-14.5 to -4.7)                |
| Mali                                                                                                                                 | 3.0 (2.5 to 3.4)           | 3.2 (2.8 to 3.7)           | 3.2 (2.8 to 3.7)           | 3.4 (2.9 to 4.0)           | 0.3 (-0.1 to 0.6)                              | 4.5 (-0.9 to 9.8)                   |
| Mauritania                                                                                                                           | 1.5 (1.3 to 1.8)           | 1.5 (1.3 to 1.8)           | 1.5 (1.3 to 1.8)           | 1.5 (1.3 to 1.8)           | -0.0 (-0.3 to 0.3)                             | -0.3 (-4.0 to 3.9)                  |
| Niger                                                                                                                                | 1.5 (1.3 to 1.8)           | 1.6 (1.3 to 1.8)           | 1.6 (1.3 to 1.8)           | 1.6 (1.3 to 1.8)           | -0.0 (-0.3 to 0.2)                             | -0.0 (-4.0 to 3.8)                  |
| Nigeria                                                                                                                              | 3.2 (2.7 to 3.6)           | 2.4 (2.1 to 2.6)           | 2.4 (2.1 to 2.8)           | 2.2 (1.9 to 2.6)           | -0.5 (-1.0 to -0.0)                            | -7.0 (-13.3 to -0.3)                |
| Sao Tome and Principe                                                                                                                | 2.7 (2.3 to 3.1)           | 2.5 (2.1 to 2.8)           | 2.4 (2.1 to 2.8)           | 2.4 (2.0 to 2.8)           | -0.2 (-0.5 to 0.1)                             | -2.3 (-6.7 to 2.0)                  |
| Senegal                                                                                                                              | 1.6 (1.4 to 1.8)           | 1.6 (1.4 to 1.8)           | 1.6 (1.4 to 1.8)           | 1.6 (1.4 to 1.9)           | 0.1 (-0.2 to 0.4)                              | 1.2 (-3.1 to 5.8)                   |
| Sierra Leone                                                                                                                         | 2.8 (2.4 to 3.2)           | 2.6 (2.3 to 2.9)           | 2.5 (2.3 to 2.8)           | 2.4 (2.1 to 2.7)           | -0.5 (-0.9 to -0.2)                            | -7.8 (-12.1 to -3.2)                |
| Togo                                                                                                                                 | 2.0 (1.7 to 2.3)           | 2.0 (1.8 to 2.2)           | 2.0 (1.8 to 2.3)           | 2.0 (1.8 to 2.2)           | 0.0 (-0.3 to 0.3)                              | 0.1 (-4.6 to 4.6)                   |
| <b>Indicator 16.2.3: Age-standardised prevalence of women and men aged 18-29 years who experienced sexual violence by age 18 (%)</b> |                            |                            |                            |                            |                                                |                                     |
| <b>Central Europe, Eastern Europe, and Central Asia</b>                                                                              |                            |                            |                            |                            |                                                |                                     |
| <b>Central Asia</b>                                                                                                                  |                            |                            |                            |                            |                                                |                                     |
| Armenia                                                                                                                              | 1.5 (1.1 to 1.9)           | 1.5 (1.2 to 1.9)           | 1.5 (1.2 to 1.9)           | 1.5 (1.2 to 1.9)           | 0.0 (-0.1 to 0.2)                              | 0.4 (-1.8 to 2.5)                   |
| Azerbaijan                                                                                                                           | 1.5 (1.1 to 1.9)           | 1.5 (1.2 to 1.9)           | 1.5 (1.2 to 1.9)           | 1.5 (1.2 to 1.9)           | 0.1 (-0.0 to 0.1)                              | 0.8 (-0.3 to 1.9)                   |
| Georgia                                                                                                                              | 1.1 (0.8 to 1.5)           | 1.2 (0.9 to 1.6)           | 1.2 (0.9 to 1.6)           | 1.2 (0.9 to 1.6)           | 0.4 (0.0 to 0.7)                               | 5.4 (0.5 to 10.6)                   |
| Kazakhstan                                                                                                                           | 2.2 (1.7 to 2.8)           | 2.3 (1.7 to 2.9)           | 2.3 (1.7 to 2.9)           | 2.4 (1.7 to 3.1)           | 0.2 (-0.4 to 0.9)                              | 3.7 (-6.4 to 14.8)                  |
| Kyrgyzstan                                                                                                                           | 1.5 (1.2 to 1.9)           | 1.5 (1.2 to 1.9)           | 1.5 (1.2 to 1.9)           | 1.5 (1.2 to 1.9)           | -0.0 (-0.2 to 0.1)                             | -0.3 (-2.7 to 2.1)                  |
| Mongolia                                                                                                                             | 1.5 (1.2 to 1.9)           | 1.5 (1.2 to 1.9)           | 1.5 (1.2 to 1.9)           | 1.5 (1.2 to 1.9)           | -0.0 (-0.2 to 0.2)                             | -0.1 (-3.0 to 2.8)                  |
| Tajikistan                                                                                                                           | 1.5 (1.2 to 1.9)           | 1.5 (1.2 to 1.9)           | 1.5 (1.2 to 1.9)           | 1.5 (1.2 to 1.9)           | 0.0 (-0.1 to 0.1)                              | 0.2 (-0.9 to 1.2)                   |
| Turkmenistan                                                                                                                         | 1.5 (1.2 to 1.9)           | 1.5 (1.2 to 1.9)           | 1.5 (1.2 to 1.9)           | 1.6 (1.2 to 2.0)           | 0.1 (0.0 to 0.1)                               | 0.9 (0.1 to 1.7)                    |



|                                    | Estimate in 2000 (95% UIs) | Estimate in 2015 (95% UIs) | Estimate in 2017 (95% UIs) | Estimate in 2020 (95% UIs) | Annualised rate of change, 2015-2020 (95% UIs) | Percent change, 2015-2020 (95% UIs) |
|------------------------------------|----------------------------|----------------------------|----------------------------|----------------------------|------------------------------------------------|-------------------------------------|
| Uzbekistan                         | 1.5 (1.2 to 1.9)           | 1.5 (1.2 to 1.9)           | 1.5 (1.2 to 1.9)           | 1.5 (1.2 to 1.9)           | 0.0 (-0.1 to 0.1)                              | 0.1 (-1.1 to 1.3)                   |
| <b>Central Europe</b>              |                            |                            |                            |                            |                                                |                                     |
| Albania                            | 6.0 (4.4 to 7.8)           | 6.6 (4.8 to 8.6)           | 6.6 (4.8 to 8.6)           | 7.0 (5.1 to 9.2)           | 0.4 (0.2 to 0.6)                               | 6.1 (2.5 to 9.4)                    |
| Bosnia and Herzegovina             | 7.5 (5.8 to 9.6)           | 7.5 (5.8 to 9.6)           | 7.5 (5.8 to 9.6)           | 7.5 (5.8 to 9.6)           | -0.0 (-0.2 to 0.1)                             | -0.2 (-2.5 to 2.0)                  |
| Bulgaria                           | 7.5 (5.8 to 9.6)           | 7.6 (5.8 to 9.6)           | 7.6 (5.8 to 9.6)           | 7.6 (5.8 to 9.7)           | 0.0 (-0.0 to 0.1)                              | 0.4 (-0.2 to 0.9)                   |
| Croatia                            | 7.5 (5.8 to 9.5)           | 7.5 (5.8 to 9.6)           | 7.5 (5.8 to 9.6)           | 7.6 (5.8 to 9.6)           | 0.0 (-0.1 to 0.1)                              | 0.4 (-0.9 to 1.8)                   |
| Czech Republic                     | 8.1 (7.1 to 9.0)           | 8.1 (6.7 to 9.6)           | 8.1 (6.2 to 10.3)          | 8.3 (5.7 to 11.6)          | 0.1 (-1.3 to 1.5)                              | 1.5 (-17.6 to 25.4)                 |
| Hungary                            | 7.5 (5.8 to 9.5)           | 7.5 (5.8 to 9.6)           | 7.5 (5.8 to 9.6)           | 7.5 (5.8 to 9.6)           | 0.0 (0.0 to 0.0)                               | 0.3 (0.2 to 0.4)                    |
| Macedonia                          | 10.7 (8.0 to 13.9)         | 11.0 (8.3 to 13.9)         | 11.0 (8.3 to 13.9)         | 11.2 (8.5 to 14.3)         | 0.1 (-0.1 to 0.3)                              | 1.3 (-2.0 to 4.3)                   |
| Montenegro                         | 7.5 (5.8 to 9.5)           | 7.6 (5.8 to 9.6)           | 7.6 (5.8 to 9.6)           | 7.6 (5.9 to 9.7)           | 0.0 (0.0 to 0.1)                               | 0.6 (0.4 to 0.9)                    |
| Poland                             | 8.2 (6.5 to 10.3)          | 8.4 (6.6 to 10.6)          | 8.4 (6.7 to 10.9)          | 8.9 (6.7 to 11.5)          | 0.4 (-0.2 to 1.0)                              | 5.6 (-3.3 to 16.6)                  |
| Romania                            | 7.5 (5.8 to 9.5)           | 7.6 (5.8 to 9.6)           | 7.6 (5.8 to 9.6)           | 7.6 (5.9 to 9.7)           | 0.0 (-0.1 to 0.2)                              | 0.6 (-1.6 to 2.8)                   |
| Serbia                             | 9.7 (7.3 to 12.4)          | 9.9 (7.6 to 12.6)          | 9.9 (7.6 to 12.7)          | 10.0 (7.7 to 13.0)         | 0.1 (-0.2 to 0.4)                              | 1.3 (-3.0 to 6.0)                   |
| Slovakia                           | 7.5 (5.8 to 9.5)           | 7.5 (5.8 to 9.6)           | 7.5 (5.8 to 9.5)           | 7.5 (5.8 to 9.6)           | 0.0 (-0.1 to 0.1)                              | 0.3 (-1.1 to 1.7)                   |
| Slovenia                           | 7.6 (5.8 to 9.6)           | 7.6 (5.8 to 9.6)           | 7.6 (5.8 to 9.6)           | 7.6 (5.8 to 9.6)           | 0.0 (-0.2 to 0.2)                              | 0.0 (-2.6 to 2.7)                   |
| <b>Eastern Europe</b>              |                            |                            |                            |                            |                                                |                                     |
| Belarus                            | 18.2 (13.7 to 23.4)        | 18.1 (13.7 to 23.2)        | 18.1 (13.7 to 23.1)        | 18.0 (13.5 to 23.2)        | -0.0 (-0.3 to 0.2)                             | -0.6 (-4.6 to 3.1)                  |
| Estonia                            | 18.1 (13.7 to 23.4)        | 18.1 (13.6 to 23.2)        | 18.1 (13.7 to 23.1)        | 18.0 (13.5 to 23.1)        | -0.0 (-0.4 to 0.3)                             | -0.4 (-5.3 to 4.1)                  |
| Latvia                             | 18.2 (13.7 to 23.4)        | 18.1 (13.6 to 23.3)        | 18.1 (13.7 to 23.1)        | 18.0 (13.5 to 23.2)        | -0.0 (-0.3 to 0.2)                             | -0.5 (-4.7 to 3.2)                  |
| Lithuania                          | 18.2 (13.7 to 23.5)        | 18.1 (13.6 to 23.3)        | 18.1 (13.6 to 23.3)        | 18.1 (13.6 to 23.2)        | -0.0 (-0.1 to 0.0)                             | -0.3 (-1.2 to 0.6)                  |
| Moldova                            | 18.2 (13.7 to 23.4)        | 18.1 (13.7 to 23.3)        | 18.1 (13.7 to 23.3)        | 18.1 (13.6 to 23.2)        | -0.0 (-0.3 to 0.2)                             | -0.4 (-4.2 to 3.1)                  |
| Russia                             | 19.0 (14.2 to 24.4)        | 19.1 (14.2 to 24.5)        | 19.1 (14.2 to 24.5)        | 19.0 (14.1 to 25.1)        | -0.0 (0.4 to 0.4)                              | -0.5 (-6.1 to 5.7)                  |
| Ukraine                            | 19.1 (14.2 to 24.6)        | 19.1 (14.2 to 24.5)        | 19.1 (14.2 to 24.5)        | 18.9 (14.1 to 24.6)        | -0.1 (-0.5 to 0.3)                             | -0.9 (-7.4 to 5.0)                  |
| <b>High-income</b>                 |                            |                            |                            |                            |                                                |                                     |
| <b>Australasia</b>                 |                            |                            |                            |                            |                                                |                                     |
| Australia                          | 8.1 (7.0 to 9.3)           | 8.9 (7.1 to 10.8)          | 8.8 (6.3 to 11.7)          | 9.3 (6.0 to 13.7)          | 0.2 (-1.5 to 1.7)                              | 3.6 (-19.7 to 28.3)                 |
| New Zealand                        | 19.4 (14.6 to 25.1)        | 18.5 (13.9 to 23.6)        | 17.8 (13.5 to 22.5)        | 17.0 (12.6 to 21.9)        | -0.6 (-1.0 to -0.1)                            | -8.2 (-13.7 to -1.7)                |
| <b>High-income Asia Pacific</b>    |                            |                            |                            |                            |                                                |                                     |
| Brunei                             | 9.7 (7.2 to 12.7)          | 9.5 (7.0 to 12.3)          | 9.5 (7.0 to 12.3)          | 9.4 (7.0 to 12.1)          | -0.1 (-0.1 to -0.0)                            | -1.1 (-1.7 to -0.3)                 |
| Japan                              | 10.1 (7.5 to 13.1)         | 10.1 (7.5 to 13.1)         | 10.1 (7.5 to 13.1)         | 10.1 (7.5 to 13.1)         | -0.0 (-0.0 to -0.0)                            | -0.2 (-0.3 to -0.1)                 |
| South Korea                        | 9.6 (7.1 to 12.5)          | 9.4 (7.0 to 12.2)          | 9.4 (7.0 to 12.2)          | 9.4 (7.0 to 12.1)          | -0.1 (-0.2 to 0.1)                             | -0.9 (-2.9 to 1.1)                  |
| Singapore                          | 9.7 (7.1 to 12.6)          | 9.7 (7.3 to 13.1)          | 10.1 (7.4 to 13.2)         | 10.5 (7.5 to 14.0)         | 0.3 (0.1 to 0.7)                               | 5.4 (0.8 to 10.7)                   |
| <b>High-income North America</b>   |                            |                            |                            |                            |                                                |                                     |
| Canada                             | 8.2 (6.9 to 9.5)           | 9.6 (8.7 to 10.6)          | 9.9 (8.9 to 11.0)          | 11.3 (9.9 to 12.9)         | 1.1 (0.6 to 1.6)                               | 18.0 (9.1 to 26.2)                  |
| Greenland                          | 10.0 (7.5 to 13.0)         | 10.2 (7.5 to 13.2)         | 10.2 (7.5 to 13.2)         | 10.2 (7.5 to 13.4)         | 0.0 (0.0 to 0.1)                               | 0.6 (0.2 to 1.0)                    |
| United States                      | 11.2 (8.3 to 14.3)         | 11.3 (8.6 to 14.4)         | 11.4 (8.6 to 14.5)         | 11.6 (8.7 to 14.8)         | 0.1 (-0.3 to 0.6)                              | 2.0 (-5.1 to 9.8)                   |
| <b>Southern Latin America</b>      |                            |                            |                            |                            |                                                |                                     |
| Argentina                          | 6.1 (4.7 to 7.8)           | 6.2 (4.6 to 7.9)           | 6.2 (4.5 to 8.0)           | 6.3 (4.4 to 8.6)           | 0.1 (-0.7 to 0.9)                              | 1.7 (-9.4 to 14.2)                  |
| Chile                              | 5.9 (4.3 to 7.6)           | 5.9 (4.3 to 7.6)           | 5.9 (4.3 to 7.6)           | 5.9 (4.3 to 7.6)           | -0.0 (-0.1 to 0.0)                             | -0.2 (-1.0 to 0.5)                  |
| Uruguay                            | 5.5 (4.3 to 6.8)           | 5.6 (4.3 to 7.0)           | 5.7 (4.3 to 7.2)           | 6.0 (4.3 to 7.9)           | 0.3 (-0.4 to 1.1)                              | 5.4 (-6.5 to 18.2)                  |
| <b>Western Europe</b>              |                            |                            |                            |                            |                                                |                                     |
| Andorra                            | 9.6 (7.2 to 12.4)          | 9.6 (7.2 to 12.4)          | 9.6 (7.2 to 12.3)          | 9.4 (7.1 to 12.2)          | -0.1 (-0.1 to -0.0)                            | -1.4 (-2.1 to -0.4)                 |
| Austria                            | 9.7 (7.2 to 12.5)          | 9.7 (7.2 to 12.5)          | 9.6 (7.2 to 12.4)          | 9.6 (7.1 to 12.4)          | -0.1 (-0.1 to -0.0)                            | -0.8 (-1.4 to -0.1)                 |
| Belgium                            | 9.7 (7.2 to 12.5)          | 9.7 (7.2 to 12.6)          | 9.7 (7.2 to 12.6)          | 9.7 (7.2 to 12.7)          | 0.0 (-0.0 to 0.0)                              | 0.1 (-0.5 to 0.7)                   |
| Cyprus                             | 9.6 (7.2 to 12.5)          | 9.5 (7.1 to 12.3)          | 9.5 (7.2 to 12.2)          | 9.5 (7.1 to 12.2)          | -0.0 (-0.1 to 0.1)                             | -0.5 (-1.8 to 0.8)                  |
| Denmark                            | 9.3 (7.2 to 11.7)          | 8.9 (6.5 to 11.6)          | 8.9 (6.4 to 11.8)          | 8.9 (6.0 to 12.4)          | -0.1 (-0.9 to 0.8)                             | -0.8 (-12.9 to 12.2)                |
| Finland                            | 8.8 (6.6 to 11.3)          | 8.7 (6.5 to 11.3)          | 8.7 (6.5 to 11.3)          | 8.7 (6.4 to 11.5)          | -0.0 (-0.2 to 0.2)                             | -0.2 (-3.2 to 3.6)                  |
| France                             | 2.3 (1.8 to 2.9)           | 2.4 (1.8 to 3.0)           | 2.4 (1.8 to 3.0)           | 2.4 (1.8 to 3.0)           | 0.1 (-0.2 to 0.3)                              | 0.9 (-3.1 to 4.3)                   |
| Germany                            | 11.5 (7.9 to 16.3)         | 11.5 (7.8 to 16.4)         | 11.4 (7.8 to 16.4)         | 11.4 (7.8 to 16.3)         | -0.1 (-0.2 to 0.1)                             | -0.8 (-2.3 to 1.0)                  |
| Greece                             | 9.6 (7.1 to 12.5)          | 9.6 (7.2 to 12.4)          | 9.6 (7.2 to 12.5)          | 9.7 (7.2 to 12.5)          | 0.0 (0.0 to 0.1)                               | 0.5 (0.1 to 0.8)                    |
| Iceland                            | 11.0 (8.7 to 13.8)         | 9.9 (7.8 to 12.4)          | 9.5 (7.3 to 12.1)          | 9.0 (6.8 to 11.8)          | -0.6 (-1.2 to -0.0)                            | -8.9 (-16.1 to -0.3)                |
| Ireland                            | 11.8 (10.3 to 13.4)        | 13.0 (10.6 to 15.6)        | 13.8 (10.4 to 17.4)        | 15.0 (10.4 to 20.3)        | 0.9 (0.3 to 1.9)                               | 15.3 (4.3 to 33.5)                  |
| Israel                             | 13.8 (10.9 to 16.8)        | 13.8 (10.8 to 16.9)        | 13.8 (10.7 to 17.1)        | 13.8 (10.1 to 18.1)        | -0.0 (-0.8 to 0.9)                             | -0.1 (-11.0 to 14.2)                |
| Italy                              | 9.7 (7.2 to 12.5)          | 9.7 (7.2 to 12.5)          | 9.6 (7.2 to 12.5)          | 9.6 (7.1 to 12.4)          | -0.0 (-0.1 to -0.0)                            | -0.6 (-1.0 to -0.2)                 |
| Luxembourg                         | 9.7 (7.2 to 12.5)          | 9.6 (7.2 to 12.4)          | 9.6 (7.2 to 12.4)          | 9.6 (7.1 to 12.4)          | -0.0 (-0.1 to 0.0)                             | -0.2 (-1.0 to 0.6)                  |
| Malta                              | 9.7 (7.2 to 12.6)          | 9.6 (7.1 to 12.4)          | 9.6 (7.2 to 12.4)          | 9.5 (7.2 to 12.3)          | -0.0 (-0.2 to 0.1)                             | -0.7 (-3.4 to 2.2)                  |
| Netherlands                        | 11.2 (10.1 to 12.4)        | 11.2 (10.1 to 12.4)        | 11.2 (10.1 to 12.4)        | 11.0 (10.0 to 12.2)        | -0.1 (-0.1 to 0.0)                             | -1.1 (-2.1 to 0.7)                  |
| Norway                             | 9.4 (6.9 to 12.4)          | 9.1 (6.6 to 12.2)          | 9.1 (6.6 to 12.2)          | 9.0 (6.5 to 12.3)          | -0.1 (-0.2 to 0.2)                             | -0.8 (-3.1 to 2.4)                  |
| Portugal                           | 9.7 (7.2 to 12.6)          | 9.7 (7.2 to 12.6)          | 9.7 (7.2 to 12.6)          | 9.7 (7.2 to 12.5)          | -0.0 (-0.1 to 0.1)                             | -0.4 (-1.9 to 1.3)                  |
| Spain                              | 8.6 (7.1 to 10.3)          | 8.8 (6.8 to 11.1)          | 9.2 (7.0 to 11.6)          | 9.8 (7.1 to 13.2)          | 0.7 (0.0 to 1.3)                               | 10.7 (0.2 to 21.7)                  |
| Sweden                             | 10.6 (7.8 to 13.6)         | 13.5 (10.1 to 17.5)        | 13.3 (9.9 to 17.3)         | 14.2 (10.1 to 19.6)        | 0.3 (-0.3 to 1.0)                              | 5.2 (-4.3 to 16.3)                  |
| Switzerland                        | 10.0 (8.3 to 11.8)         | 8.9 (7.1 to 11.1)          | 9.9 (7.3 to 12.8)          | 10.5 (7.4 to 14.3)         | 1.1 (-0.0 to 2.0)                              | 17.4 (-0.5 to 35.5)                 |
| United Kingdom                     | 12.8 (10.0 to 16.0)        | 11.5 (8.8 to 14.4)         | 11.1 (8.4 to 14.0)         | 10.3 (7.6 to 13.2)         | -0.8 (-1.1 to -0.3)                            | -10.8 (-15.7 to -4.9)               |
| <b>Latin America and Caribbean</b> |                            |                            |                            |                            |                                                |                                     |
| <b>Andean Latin America</b>        |                            |                            |                            |                            |                                                |                                     |
| Bolivia                            | 12.5 (9.1 to 16.4)         | 12.3 (9.0 to 16.1)         | 12.3 (9.0 to 16.1)         | 12.2 (8.9 to 15.8)         | -0.1 (-0.1 to 0.0)                             | -0.9 (-2.2 to 0.3)                  |
| Ecuador                            | 12.5 (9.1 to 16.4)         | 12.4 (9.0 to 16.2)         | 12.4 (9.0 to 16.1)         | 12.3 (9.0 to 16.0)         | -0.1 (-0.1 to -0.0)                            | -0.9 (-1.5 to -0.3)                 |
| Peru                               | 12.1 (9.8 to 14.4)         | 12.2 (9.5 to 15.3)         | 12.4 (9.0 to 16.1)         | 12.8 (8.3 to 18.1)         | 0.2 (-1.0 to 1.4)                              | 3.5 (-1.4 to 23.0)                  |
| <b>Caribbean</b>                   |                            |                            |                            |                            |                                                |                                     |
| Antigua and Barbuda                | 9.8 (7.2 to 12.6)          | 9.6 (7.2 to 12.3)          | 9.6 (7.1 to 12.2)          | 9.5 (7.1 to 12.1)          | -0.1 (-0.2 to 0.0)                             | -1.2 (-2.8 to 0.4)                  |
| The Bahamas                        | 9.7 (7.2 to 12.3)          | 9.6 (7.2 to 12.3)          | 9.6 (7.2 to 12.3)          | 9.6 (7.1 to 12.2)          | -0.0 (-0.0 to -0.0)                            | -0.3 (-0.5 to -0.1)                 |
| Barbados                           | 9.6 (7.1 to 12.2)          | 9.6 (7.1 to 12.3)          | 9.6 (7.1 to 12.3)          | 9.6 (7.1 to 12.3)          | 0.0 (0.0 to 0.1)                               | 0.4 (-0.4 to 1.2)                   |
| Belize                             | 4.4 (3.7 to 5.3)           | 4.5 (3.5 to 5.5)           | 4.5 (3.4 to 5.7)           | 4.7 (3.3 to 6.3)           | 0.2 (-0.8 to 1.3)                              | 3.4 (-10.7 to 21.4)                 |
| Bermuda                            | 9.7 (7.2 to 12.4)          | 9.7 (7.2 to 12.5)          | 9.7 (7.2 to 12.5)          | 9.8 (7.2 to 12.6)          | 0.0 (0.0 to 0.1)                               | 0.5 (0.2 to 0.8)                    |
| Cuba                               | 9.6 (7.2 to 12.3)          | 9.5 (7.1 to 12.1)          | 9.5 (7.2 to 12.1)          | 9.5 (7.1 to 12.0)          | -0.0 (-0.0 to -0.0)                            | -0.3 (-0.4 to -0.0)                 |
| Dominica                           | 9.5 (7.1 to 12.0)          | 9.5 (7.1 to 12.1)          | 9.5 (7.1 to 12.1)          | 9.5 (7.1 to 12.1)          | 0.0 (-0.0 to 0.0)                              | 0.0 (-0.7 to 0.7)                   |
| Dominican Republic                 | 9.6 (7.2 to 12.3)          | 9.5 (7.1 to 12.1)          | 9.5 (7.1 to 12.2)          | 9.5 (7.1 to 12.0)          | -0.0 (-0.1 to 0.0)                             | -0.5 (-1.0 to 0.1)                  |
| Grenada                            | 9.5 (7.0 to 12.1)          | 9.4 (7.1 to 12.0)          | 9.4 (7.1 to 12.0)          | 9.2 (6.9 to 11.8)          | -0.1 (-0.3 to 0.0)                             | -2.0 (-4.3 to 0.1)                  |
| Guyana                             | 9.6 (7.1 to 12.2)          | 9.5 (7.1 to 12.2)          | 9.5 (7.0 to 12.2)          | 9.9 (7.3 to 0.8)           | 0.2 (-0.3 to 0.8)                              | 3.7 (-4.0 to 12.1)                  |
| Haiti                              | 9.7 (7.1 to 12.4)          | 9.7 (7.2 to 12.5)          | 9.7 (7.2 to 12.4)          | 9.7 (7.2 to 12.3)          | -0.0 (-0.1 to 0.0)                             | -0.6 (-1.3 to 0.1)                  |

|                                               | Estimate in 2000 (95% UIs) | Estimate in 2015 (95% UIs) | Estimate in 2017 (95% UIs) | Estimate in 2030 (95% UIs) | Annualised rate of change, 2015-2030 (95% UIs) | Percent change, 2015-2030 (95% UIs) |
|-----------------------------------------------|----------------------------|----------------------------|----------------------------|----------------------------|------------------------------------------------|-------------------------------------|
| <b>Jamaica</b>                                | 21.4 (15.9 to 27.8)        | 20.9 (15.4 to 27.0)        | 20.9 (15.4 to 27.1)        | 20.7 (14.8 to 27.6)        | -0.1 (-0.5 to 0.6)                             | -1.3 (-1.3 to 9.8)                  |
| <b>Puerto Rico</b>                            | 9.6 (7.1 to 12.2)          | 9.6 (7.1 to 12.2)          | 9.6 (7.1 to 12.2)          | 9.6 (7.1 to 12.2)          | 0.0 (-0.1 to 0.1)                              | 0.1 (-1.0 to 1.2)                   |
| <b>Saint Lucia</b>                            | 9.6 (7.1 to 12.3)          | 9.5 (7.1 to 12.1)          | 9.5 (7.1 to 12.1)          | 9.5 (7.1 to 12.0)          | -0.0 (-0.1 to 0.1)                             | -0.2 (-1.7 to 1.3)                  |
| <b>Saint Vincent and the Grenadines</b>       | 9.4 (7.0 to 12.0)          | 9.5 (7.1 to 12.0)          | 9.5 (7.1 to 12.0)          | 9.5 (7.1 to 12.0)          | 0.0 (-0.0 to 0.0)                              | 0.0 (-0.5 to 0.5)                   |
| <b>Suriname</b>                               | 9.5 (7.1 to 12.1)          | 9.6 (7.1 to 12.3)          | 9.6 (7.1 to 12.3)          | 9.7 (7.2 to 12.4)          | 0.1 (-0.0 to 0.1)                              | 0.8 (-0.0 to 1.5)                   |
| <b>Trinidad and Tobago</b>                    | 9.4 (7.0 to 12.0)          | 9.6 (7.2 to 12.2)          | 9.6 (7.1 to 12.2)          | 9.5 (7.1 to 12.1)          | -0.1 (-0.3 to 0.1)                             | -1.3 (-4.1 to 1.5)                  |
| <b>Virgin Islands, U.S.</b>                   | 9.8 (7.2 to 12.6)          | 9.8 (7.2 to 12.5)          | 9.7 (7.2 to 12.4)          | 9.7 (7.2 to 12.4)          | -0.0 (-0.1 to 0.1)                             | -0.4 (-2.1 to 1.1)                  |
| <b>Central Latin America</b>                  |                            |                            |                            |                            |                                                |                                     |
| <b>Colombia</b>                               | 8.4 (6.5 to 10.6)          | 8.4 (6.5 to 10.6)          | 8.4 (6.5 to 10.6)          | 8.4 (6.5 to 10.6)          | 0.0 (-0.1 to 0.1)                              | 0.1 (-0.9 to 1.2)                   |
| <b>Costa Rica</b>                             | 18.0 (15.8 to 20.2)        | 18.4 (15.2 to 21.8)        | 18.6 (14.2 to 23.4)        | 19.2 (13.3 to 26.5)        | 0.2 (-1.1 to 1.5)                              | 3.9 (-15.6 to 26.1)                 |
| <b>El Salvador</b>                            | 7.8 (6.6 to 9.2)           | 7.8 (6.5 to 9.2)           | 7.8 (6.5 to 9.3)           | 7.9 (6.4 to 9.7)           | 0.1 (-0.4 to 0.5)                              | 1.6 (-5.4 to 8.3)                   |
| <b>Guatemala</b>                              | 6.4 (5.2 to 7.8)           | 6.6 (5.4 to 8.1)           | 6.7 (5.4 to 8.2)           | 7.0 (5.5 to 8.7)           | 0.3 (-0.2 to 0.8)                              | 5.3 (-2.4 to 12.5)                  |
| <b>Honduras</b>                               | 8.4 (7.0 to 9.9)           | 8.6 (6.9 to 10.3)          | 8.7 (6.7 to 11.0)          | 9.0 (6.3 to 12.2)          | 0.3 (-0.9 to 1.5)                              | 4.6 (-13.3 to 25.4)                 |
| <b>Mexico</b>                                 | 7.2 (5.4 to 9.1)           | 7.2 (5.4 to 9.1)           | 7.3 (5.4 to 9.2)           | 7.4 (5.5 to 9.6)           | 0.1 (-0.4 to 0.7)                              | 2.2 (-5.9 to 10.8)                  |
| <b>Nicaragua</b>                              | 5.9 (4.8 to 7.2)           | 5.7 (4.8 to 6.8)           | 5.8 (4.7 to 7.0)           | 5.7 (4.3 to 7.2)           | -0.0 (-0.9 to 0.8)                             | -0.5 (-12.3 to 12.0)                |
| <b>Panama</b>                                 | 8.4 (6.5 to 10.6)          | 8.4 (6.5 to 10.6)          | 8.4 (6.5 to 10.6)          | 8.4 (6.5 to 10.6)          | -0.0 (-0.0 to 0.0)                             | -0.1 (-0.3 to 0.1)                  |
| <b>Venezuela</b>                              | 8.4 (6.5 to 10.6)          | 8.4 (6.5 to 10.6)          | 8.4 (6.5 to 10.6)          | 8.4 (6.5 to 10.6)          | 0.0 (-0.1 to 0.1)                              | 0.2 (-0.9 to 1.2)                   |
| <b>Tropical Latin America</b>                 |                            |                            |                            |                            |                                                |                                     |
| <b>Brazil</b>                                 | 5.9 (4.4 to 7.4)           | 6.1 (4.6 to 7.8)           | 6.2 (4.6 to 7.9)           | 6.4 (4.7 to 8.5)           | 0.3 (-0.1 to 0.9)                              | 5.3 (-2.2 to 13.7)                  |
| <b>Paraguay</b>                               | 3.6 (2.9 to 4.4)           | 3.4 (2.7 to 4.3)           | 3.3 (2.6 to 4.2)           | 3.2 (2.4 to 4.0)           | -0.6 (-1.0 to -0.2)                            | -8.5 (-14.1 to -2.9)                |
| <b>North Africa and Middle East</b>           |                            |                            |                            |                            |                                                |                                     |
| <b>North Africa and Middle East</b>           |                            |                            |                            |                            |                                                |                                     |
| <b>Alghanistan</b>                            | 8.0 (6.1 to 10.1)          | 7.9 (6.0 to 10.1)          | 7.9 (6.0 to 10.1)          | 7.9 (6.0 to 10.1)          | 0.0 (-0.1 to 0.1)                              | 0.3 (-1.0 to 1.7)                   |
| <b>Algeria</b>                                | 8.0 (6.0 to 10.1)          | 8.0 (6.1 to 10.1)          | 8.0 (6.1 to 10.1)          | 7.9 (6.0 to 10.1)          | -0.0 (-0.2 to 0.2)                             | -0.5 (-3.6 to 2.5)                  |
| <b>Bahrain</b>                                | 7.8 (6.0 to 9.9)           | 7.9 (6.1 to 9.9)           | 7.9 (6.1 to 10.0)          | 8.0 (6.1 to 10.2)          | 0.1 (-0.1 to 0.4)                              | 1.8 (-1.6 to 5.8)                   |
| <b>Egypt</b>                                  | 8.0 (6.0 to 10.1)          | 8.0 (6.0 to 10.1)          | 8.0 (6.0 to 10.1)          | 8.0 (6.0 to 10.1)          | -0.0 (-0.2 to 0.1)                             | -0.3 (-2.3 to 1.7)                  |
| <b>Iran</b>                                   | 8.2 (6.2 to 10.5)          | 8.3 (6.3 to 10.5)          | 8.3 (6.3 to 10.5)          | 8.2 (6.2 to 10.5)          | -0.1 (-0.3 to 0.2)                             | -0.9 (-4.4 to 2.5)                  |
| <b>Iraq</b>                                   | 7.9 (6.0 to 10.0)          | 7.9 (6.0 to 10.0)          | 7.9 (6.0 to 10.0)          | 8.0 (6.0 to 10.1)          | 0.0 (-0.0 to 0.0)                              | 0.2 (-0.2 to 0.6)                   |
| <b>Jordan</b>                                 | 7.9 (6.0 to 10.0)          | 7.9 (6.0 to 9.9)           | 7.8 (6.0 to 9.9)           | 7.8 (6.0 to 9.9)           | -0.0 (-0.1 to 0.0)                             | -0.6 (-1.3 to 0.3)                  |
| <b>Kuwait</b>                                 | 7.8 (6.0 to 9.9)           | 8.0 (6.2 to 10.2)          | 8.0 (6.1 to 10.1)          | 8.1 (6.1 to 10.3)          | 0.0 (-0.3 to 0.4)                              | 0.6 (-5.0 to 6.5)                   |
| <b>Lebanon</b>                                | 8.0 (6.1 to 10.1)          | 8.0 (6.0 to 10.1)          | 8.0 (6.1 to 10.0)          | 8.0 (6.1 to 10.1)          | 0.0 (-0.2 to 0.2)                              | 0.1 (-2.6 to 2.9)                   |
| <b>Libya</b>                                  | 8.0 (6.0 to 10.1)          | 8.0 (6.1 to 10.1)          | 8.0 (6.1 to 10.1)          | 8.0 (6.1 to 10.1)          | -0.0 (-0.2 to 0.1)                             | -0.1 (-2.3 to 2.1)                  |
| <b>Morocco</b>                                | 8.8 (7.0 to 11.0)          | 9.5 (7.2 to 12.0)          | 10.0 (7.4 to 12.9)         | 10.7 (7.6 to 14.6)         | 0.8 (0.0 to 1.5)                               | 12.8 (0.6 to 24.3)                  |
| <b>Palestine</b>                              | 7.9 (6.0 to 10.1)          | 7.9 (6.0 to 10.1)          | 7.9 (6.0 to 10.0)          | 7.9 (6.0 to 10.1)          | 0.0 (-0.1 to 0.1)                              | 0.0 (-1.5 to 1.5)                   |
| <b>Oman</b>                                   | 7.9 (6.0 to 10.0)          | 7.7 (5.8 to 9.8)           | 7.6 (5.6 to 9.8)           | 7.4 (5.6 to 9.6)           | -0.2 (-0.4 to 0.0)                             | -2.8 (-6.0 to 0.6)                  |
| <b>Qatar</b>                                  | 7.5 (5.8 to 9.6)           | 7.5 (5.4 to 9.5)           | 7.2 (5.4 to 9.4)           | 7.1 (5.2 to 9.4)           | -0.2 (-0.3 to 0.1)                             | -2.2 (-5.1 to 1.4)                  |
| <b>Saudi Arabia</b>                           | 7.8 (6.0 to 9.9)           | 7.8 (6.0 to 9.9)           | 7.8 (6.0 to 9.9)           | 7.8 (6.0 to 9.9)           | -0.0 (-0.1 to 0.0)                             | -0.5 (-1.3 to 0.3)                  |
| <b>Sudan</b>                                  | 8.0 (6.1 to 10.2)          | 8.0 (6.1 to 10.2)          | 8.0 (6.1 to 10.1)          | 7.9 (6.0 to 10.0)          | -0.0 (-0.1 to 0.0)                             | -0.7 (-1.9 to 0.6)                  |
| <b>Syria</b>                                  | 8.0 (6.0 to 10.1)          | 8.0 (6.0 to 10.2)          | 8.0 (6.0 to 10.3)          | 8.1 (6.0 to 10.2)          | 0.1 (-0.1 to 0.2)                              | 0.9 (-1.5 to 3.2)                   |
| <b>Tunisia</b>                                | 8.0 (6.0 to 10.1)          | 8.0 (6.1 to 10.2)          | 8.0 (6.1 to 10.2)          | 8.0 (6.1 to 10.2)          | -0.0 (-0.1 to 0.1)                             | -0.0 (-1.6 to 1.6)                  |
| <b>Turkey</b>                                 | 6.5 (5.2 to 8.0)           | 6.4 (5.6 to 7.3)           | 6.4 (5.6 to 7.3)           | 6.4 (5.4 to 7.4)           | -0.1 (-0.5 to 0.4)                             | -1.0 (-7.6 to 6.4)                  |
| <b>United Arab Emirates</b>                   | 7.6 (5.8 to 9.8)           | 7.6 (5.6 to 10.0)          | 7.7 (5.8 to 10.0)          | 7.8 (5.8 to 10.2)          | 0.1 (-0.1 to 0.5)                              | 2.2 (-2.2 to 8.0)                   |
| <b>Yemen</b>                                  | 7.9 (6.0 to 10.1)          | 8.0 (6.0 to 10.1)          | 8.0 (6.0 to 10.1)          | 8.0 (6.1 to 10.2)          | 0.0 (-0.0 to 0.0)                              | 0.2 (-0.1 to 0.5)                   |
| <b>South Asia</b>                             |                            |                            |                            |                            |                                                |                                     |
| <b>South Asia</b>                             |                            |                            |                            |                            |                                                |                                     |
| <b>Bangladesh</b>                             | 22.1 (18.4 to 26.6)        | 22.4 (18.6 to 26.8)        | 22.3 (18.6 to 26.8)        | 22.2 (18.4 to 26.6)        | -0.1 (-0.1 to 0.0)                             | -0.9 (-1.7 to 0.6)                  |
| <b>Bhutan</b>                                 | 15.1 (11.7 to 18.7)        | 15.1 (11.7 to 18.9)        | 15.1 (11.7 to 18.9)        | 15.0 (11.6 to 18.7)        | -0.0 (-0.1 to 0.0)                             | -0.5 (-1.2 to 0.4)                  |
| <b>India</b>                                  | 9.8 (7.5 to 12.6)          | 10.2 (7.6 to 13.1)         | 10.5 (7.8 to 13.6)         | 11.1 (8.1 to 14.7)         | 0.6 (0.0 to 1.1)                               | 9.0 (0.5 to 17.9)                   |
| <b>Nepal</b>                                  | 14.8 (11.5 to 18.5)        | 14.7 (11.4 to 18.5)        | 14.8 (11.4 to 18.5)        | 14.8 (11.4 to 18.6)        | 0.0 (-0.1 to 0.2)                              | 0.1 (-2.2 to 2.8)                   |
| <b>Pakistan</b>                               | 15.0 (11.6 to 18.6)        | 14.9 (11.6 to 18.6)        | 14.9 (11.6 to 18.6)        | 14.9 (11.5 to 18.6)        | -0.0 (-0.1 to 0.0)                             | -0.1 (-0.7 to 0.4)                  |
| <b>Southeast Asia, East Asia, and Oceania</b> |                            |                            |                            |                            |                                                |                                     |
| <b>East Asia</b>                              |                            |                            |                            |                            |                                                |                                     |
| <b>China</b>                                  | 5.8 (4.5 to 7.2)           | 6.1 (4.7 to 7.7)           | 6.3 (4.8 to 7.9)           | 6.7 (5.0 to 8.6)           | 0.6 (0.1 to 1.1)                               | 9.8 (2.0 to 17.1)                   |
| <b>North Korea</b>                            | 5.0 (3.9 to 6.3)           | 5.2 (4.0 to 6.6)           | 5.2 (4.0 to 6.5)           | 5.3 (4.0 to 7.0)           | 0.1 (-0.0 to 0.3)                              | 1.6 (-0.7 to 4.0)                   |
| <b>Taiwan (Province of China)</b>             | 5.4 (4.1 to 6.7)           | 5.4 (4.2 to 6.8)           | 5.4 (4.2 to 6.8)           | 5.5 (4.1 to 7.0)           | 0.1 (-0.5 to 0.7)                              | 1.4 (-7.0 to 11.2)                  |
| <b>Oceania</b>                                |                            |                            |                            |                            |                                                |                                     |
| <b>American Samoa</b>                         | 20.9 (15.7 to 27.2)        | 20.4 (15.4 to 26.3)        | 20.4 (15.4 to 26.3)        | 20.1 (15.2 to 25.8)        | -0.1 (-0.3 to 0.1)                             | -1.4 (-4.2 to 1.3)                  |
| <b>Federated States of Micronesia</b>         | 20.5 (15.5 to 26.5)        | 20.9 (15.7 to 27.1)        | 20.9 (15.7 to 27.1)        | 21.3 (16.0 to 27.7)        | 0.1 (-0.0 to 0.2)                              | 1.8 (-0.0 to 3.7)                   |
| <b>Fiji</b>                                   | 20.9 (15.7 to 27.1)        | 20.8 (15.6 to 27.0)        | 20.8 (15.6 to 27.0)        | 20.7 (15.6 to 26.8)        | -0.0 (-0.1 to 0.0)                             | -0.7 (-1.6 to 0.3)                  |
| <b>Guam</b>                                   | 20.9 (15.7 to 27.1)        | 21.4 (16.0 to 27.6)        | 21.4 (16.0 to 27.7)        | 21.8 (16.3 to 28.4)        | 0.1 (0.0 to 0.2)                               | 1.6 (0.1 to 3.1)                    |
| <b>Kiribati</b>                               | 20.2 (15.2 to 26.1)        | 20.4 (15.4 to 26.5)        | 20.4 (15.3 to 26.4)        | 20.4 (15.3 to 26.3)        | -0.0 (-0.1 to 0.0)                             | -0.2 (-1.0 to 0.6)                  |
| <b>Marshall Islands</b>                       | 20.6 (15.5 to 26.6)        | 21.1 (15.8 to 27.4)        | 21.0 (15.8 to 27.3)        | 21.2 (15.9 to 27.6)        | 0.1 (0.0 to 0.1)                               | 0.8 (0.2 to 1.4)                    |
| <b>Northern Mariana Islands</b>               | 15.7 (12.0 to 20.0)        | 20.3 (15.4 to 26.1)        | 20.4 (15.4 to 26.3)        | 20.9 (15.4 to 27.0)        | 0.2 (-0.2 to 0.5)                              | 2.7 (-3.0 to 8.0)                   |
| <b>Papua New Guinea</b>                       | 21.3 (17.9 to 24.9)        | 21.3 (17.8 to 24.9)        | 21.3 (17.8 to 24.9)        | 21.3 (17.8 to 25.0)        | 0.0 (-0.1 to 0.2)                              | 0.3 (-2.0 to 3.0)                   |
| <b>Samoa</b>                                  | 21.3 (16.0 to 27.6)        | 21.0 (15.8 to 27.2)        | 21.0 (15.7 to 27.1)        | 20.7 (15.6 to 26.9)        | -0.1 (-0.1 to -0.1)                            | -1.2 (-1.6 to -0.8)                 |
| <b>Solomon Islands</b>                        | 21.9 (17.0 to 27.9)        | 21.7 (16.9 to 27.7)        | 21.8 (16.9 to 27.8)        | 21.8 (16.9 to 27.8)        | 0.0 (-0.1 to 0.1)                              | 0.1 (-1.0 to 1.5)                   |
| <b>Tonga</b>                                  | 18.7 (13.9 to 24.6)        | 19.1 (14.1 to 25.1)        | 19.0 (14.1 to 25.1)        | 19.4 (14.2 to 25.8)        | 0.1 (-0.1 to 0.3)                              | 1.8 (-0.9 to 4.5)                   |
| <b>Vanuatu</b>                                | 20.3 (15.3 to 26.0)        | 20.1 (15.2 to 26.0)        | 20.0 (15.2 to 25.9)        | 19.8 (15.0 to 25.9)        | -0.1 (-0.2 to -0.0)                            | -1.4 (-2.4 to -0.5)                 |
| <b>Southeast Asia</b>                         |                            |                            |                            |                            |                                                |                                     |
| <b>Cambodia</b>                               | 9.2 (7.9 to 10.7)          | 9.4 (8.1 to 10.8)          | 9.4 (8.1 to 10.9)          | 9.6 (8.2 to 11.0)          | 0.1 (-0.0 to 0.3)                              | 1.8 (-0.6 to 4.2)                   |
| <b>Indonesia</b>                              | 5.8 (4.4 to 7.3)           | 5.9 (4.5 to 7.5)           | 5.9 (4.5 to 7.5)           | 5.9 (4.5 to 7.6)           | 0.1 (-0.1 to 0.2)                              | 0.9 (-0.9 to 2.8)                   |
| <b>Laos</b>                                   | 5.7 (4.4 to 7.2)           | 5.8 (4.4 to 7.3)           | 5.8 (4.4 to 7.3)           | 5.8 (4.5 to 7.4)           | 0.1 (0.0 to 0.1)                               | 1.4 (0.6 to 2.2)                    |
| <b>Malaysia</b>                               | 5.7 (4.3 to 7.3)           | 5.8 (4.4 to 7.4)           | 5.8 (4.4 to 7.4)           | 5.9 (4.4 to 7.6)           | 0.1 (-0.4 to 0.6)                              | 1.1 (-5.3 to 9.2)                   |
| <b>Maldives</b>                               | 5.7 (4.4 to 7.2)           | 6.4 (4.9 to 8.2)           | 6.5 (4.9 to 8.4)           | 7.2 (5.4 to 9.4)           | 0.7 (0.5 to 0.9)                               | 11.3 (7.2 to 15.1)                  |
| <b>Mauritius</b>                              | 5.8 (4.4 to 7.3)           | 5.8 (4.4 to 7.3)           | 5.8 (4.4 to 7.3)           | 5.8 (4.4 to 7.4)           | 0.0 (-0.1 to 0.2)                              | 0.3 (-1.9 to 2.6)                   |
| <b>Myanmar</b>                                | 5.7 (4.4 to 7.2)           | 5.7 (4.4 to 7.2)           | 5.7 (4.4 to 7.2)           | 5.7 (4.4 to 7.2)           | 0.0 (-0.0 to 0.1)                              | 0.6 (-0.3 to 1.7)                   |
| <b>Philippines</b>                            | 4.9 (3.7 to 6.4)           | 5.0 (3.7 to 6.4)           | 5.0 (3.7 to 6.4)           | 5.0 (3.7 to 6.5)           | -0.0 (-0.3 to 0.3)                             | -0.1 (-3.8 to 4.0)                  |
| <b>Sri Lanka</b>                              | 8.2 (7.1 to 9.5)           | 8.1 (7.0 to 9.4)           | 8.2 (6.9 to 9.6)           | 8.2 (6.6 to 9.9)           | 0.0 (-0.6 to 0.7)                              | 0.6 (-8.5 to 11.0)                  |
| <b>Seychelles</b>                             | 5.8 (4.5 to 7.3)           | 6.1 (4.7 to 7.8)           | 6.1 (4.7 to 7.7)           | 6.2 (4.8 to 7.9)           | 0.1 (0.0 to 0.2)                               | 2.0 (0.4 to 3.7)                    |
| <b>Thailand</b>                               | 3.1 (2.1 to 4.4)           | 3.0 (2.1 to 4.4)           | 3.0 (2.0 to 4.5)           | 3.0 (2.0 to 4.7)           | -0.0 (-0.6 to 0.8)                             | -0.6 (-9.1 to 12.3)                 |

|                                                                                                                                      | Estimate in 2000 (95% UIs) | Estimate in 2015 (95% UIs) | Estimate in 2017 (95% UIs) | Estimate in 2020 (95% UIs) | Annualised rate of change, 2015-2020 (95% UIs) | Percent change, 2015-2020 (95% UIs) |
|--------------------------------------------------------------------------------------------------------------------------------------|----------------------------|----------------------------|----------------------------|----------------------------|------------------------------------------------|-------------------------------------|
| Timor-Leste                                                                                                                          | 8.2 (6.4 to 10.2)          | 8.2 (6.3 to 10.3)          | 8.1 (6.3 to 10.3)          | 8.1 (6.1 to 10.6)          | -0.1 (-0.5 to 0.4)                             | -1.0 (-7.5 to 6.7)                  |
| Vietnam                                                                                                                              | 5.2 (4.0 to 6.6)           | 5.2 (4.0 to 6.7)           | 5.2 (4.0 to 6.8)           | 5.2 (4.0 to 6.7)           | 0.0 (-0.0 to 0.1)                              | 0.4 (-0.7 to 1.6)                   |
| <b>Sub-Saharan Africa</b>                                                                                                            |                            |                            |                            |                            |                                                |                                     |
| <b>Central Sub-Saharan Africa</b>                                                                                                    |                            |                            |                            |                            |                                                |                                     |
| Angola                                                                                                                               | 14.4 (10.8 to 18.2)        | 14.4 (10.9 to 18.3)        | 14.4 (10.9 to 18.2)        | 14.5 (10.9 to 18.3)        | 0.0 (-0.0 to 0.0)                              | 0.1 (-0.3 to 0.5)                   |
| Central African Republic                                                                                                             | 14.4 (10.8 to 18.1)        | 14.4 (10.8 to 18.2)        | 14.4 (10.8 to 18.3)        | 14.4 (10.8 to 18.3)        | 0.0 (-0.0 to 0.0)                              | 0.2 (-0.2 to 0.5)                   |
| Congo                                                                                                                                | 14.3 (10.8 to 18.1)        | 14.4 (10.8 to 18.1)        | 14.4 (10.8 to 18.1)        | 14.4 (10.9 to 18.1)        | -0.0 (-0.0 to 0.0)                             | -0.0 (-0.4 to 0.3)                  |
| Democratic Republic of the Congo                                                                                                     | 14.3 (10.8 to 18.0)        | 14.3 (10.8 to 18.0)        | 14.3 (10.8 to 18.0)        | 14.3 (10.8 to 17.9)        | -0.0 (-0.0 to 0.0)                             | -0.0 (-0.1 to 0.1)                  |
| Equatorial Guinea                                                                                                                    | 14.5 (10.8 to 18.4)        | 14.1 (10.7 to 17.6)        | 14.1 (10.7 to 17.6)        | 13.8 (10.6 to 17.2)        | -0.1 (-0.4 to 0.2)                             | -2.0 (-6.3 to 2.6)                  |
| Gabon                                                                                                                                | 14.4 (10.9 to 18.2)        | 14.4 (10.9 to 18.2)        | 14.4 (10.9 to 18.2)        | 14.5 (10.9 to 18.4)        | 0.0 (-0.0 to 0.1)                              | 0.3 (-0.3 to 0.8)                   |
| <b>Eastern Sub-Saharan Africa</b>                                                                                                    |                            |                            |                            |                            |                                                |                                     |
| Burundi                                                                                                                              | 12.7 (9.9 to 15.9)         | 12.7 (9.9 to 15.9)         | 12.7 (9.9 to 15.9)         | 12.7 (9.8 to 15.9)         | -0.0 (-0.1 to 0.1)                             | -0.1 (-1.4 to 1.2)                  |
| Comoros                                                                                                                              | 12.8 (10.0 to 16.1)        | 12.8 (10.0 to 16.1)        | 12.8 (10.0 to 16.1)        | 12.8 (10.0 to 16.1)        | 0.0 (-0.0 to 0.0)                              | 0.1 (-0.4 to 0.5)                   |
| Djibouti                                                                                                                             | 13.1 (10.2 to 16.4)        | 12.9 (10.0 to 16.1)        | 13.0 (10.1 to 16.2)        | 12.9 (10.1 to 16.2)        | 0.0 (-0.0 to 0.0)                              | 0.2 (-0.2 to 0.7)                   |
| Eritrea                                                                                                                              | 12.9 (10.1 to 16.2)        | 12.9 (10.1 to 16.2)        | 12.9 (10.1 to 16.2)        | 12.9 (10.0 to 16.2)        | 0.0 (-0.1 to 0.1)                              | 0.1 (-1.4 to 1.4)                   |
| Ethiopia                                                                                                                             | 16.8 (12.8 to 21.0)        | 16.8 (12.8 to 21.0)        | 16.8 (12.8 to 20.9)        | 16.8 (12.8 to 21.1)        | -0.0 (-0.2 to 0.2)                             | -0.0 (-3.1 to 3.0)                  |
| Kenya                                                                                                                                | 21.6 (16.4 to 27.2)        | 21.7 (16.6 to 27.1)        | 21.7 (16.6 to 27.4)        | 22.2 (-0.4 to 29.1)        | 0.2 (-0.4 to 0.8)                              | 2.6 (-6.1 to 13.1)                  |
| Madagascar                                                                                                                           | 12.8 (10.0 to 16.0)        | 12.8 (10.0 to 16.1)        | 12.8 (10.0 to 16.1)        | 12.9 (10.0 to 16.1)        | 0.0 (-0.0 to 0.1)                              | 0.4 (-0.3 to 1.1)                   |
| Malawi                                                                                                                               | 12.7 (9.9 to 15.9)         | 12.7 (9.9 to 15.8)         | 12.7 (9.9 to 15.8)         | 12.7 (9.9 to 15.8)         | 0.0 (-0.0 to 0.0)                              | 0.0 (-0.5 to 0.5)                   |
| Mozambique                                                                                                                           | 8.2 (6.1 to 10.6)          | 8.3 (6.2 to 10.7)          | 8.4 (6.2 to 10.7)          | 8.5 (6.4 to 10.9)          | 0.1 (-0.1 to 0.4)                              | 2.2 (-0.9 to 6.9)                   |
| Rwanda                                                                                                                               | 12.6 (9.8 to 15.8)         | 12.8 (10.0 to 16.0)        | 12.8 (10.0 to 16.0)        | 12.9 (10.0 to 16.1)        | 0.0 (-0.1 to 0.2)                              | 0.7 (-1.2 to 2.4)                   |
| Somalia                                                                                                                              | 13.0 (10.1 to 16.3)        | 13.0 (10.1 to 16.3)        | 13.0 (10.1 to 16.3)        | 12.9 (10.0 to 16.2)        | -0.0 (-0.1 to 0.0)                             | -0.4 (-1.1 to 0.2)                  |
| South Sudan                                                                                                                          | 12.9 (10.1 to 16.2)        | 12.8 (10.0 to 15.9)        | 12.8 (10.0 to 16.0)        | 12.7 (9.9 to 15.9)         | -0.0 (-0.1 to 0.0)                             | -0.4 (-0.8 to 0.1)                  |
| Tanzania                                                                                                                             | 13.9 (11.1 to 16.7)        | 14.7 (11.5 to 18.1)        | 15.3 (11.8 to 19.2)        | 16.7 (12.3 to 21.8)        | 0.8 (0.2 to 1.5)                               | 13.2 (2.4 to 25.8)                  |
| Uganda                                                                                                                               | 12.9 (10.4 to 15.5)        | 12.7 (10.1 to 15.5)        | 12.5 (9.6 to 15.7)         | 12.3 (9.0 to 16.6)         | -0.3 (-1.1 to 0.7)                             | -3.5 (-15.0 to 10.4)                |
| Zambia                                                                                                                               | 11.6 (8.8 to 14.6)         | 11.6 (8.7 to 14.7)         | 11.6 (8.7 to 14.7)         | 11.7 (8.6 to 14.9)         | 0.0 (-0.2 to 0.3)                              | 0.5 (-3.3 to 5.2)                   |
| <b>Southern Sub-Saharan Africa</b>                                                                                                   |                            |                            |                            |                            |                                                |                                     |
| Botswana                                                                                                                             | 32.9 (23.4 to 43.3)        | 32.4 (23.4 to 42.4)        | 32.4 (23.4 to 42.3)        | 32.2 (23.4 to 42.5)        | -0.0 (-0.2 to 0.2)                             | -0.4 (-3.0 to 2.5)                  |
| Lesotho                                                                                                                              | 15.3 (11.2 to 20.3)        | 15.1 (11.2 to 19.8)        | 15.1 (11.2 to 19.8)        | 15.0 (11.2 to 19.7)        | -0.0 (-0.0 to -0.0)                            | -0.4 (-0.7 to -0.1)                 |
| Namibia                                                                                                                              | 15.2 (11.2 to 20.1)        | 15.2 (11.3 to 20.1)        | 15.2 (11.3 to 20.0)        | 15.2 (11.3 to 19.9)        | -0.0 (-0.1 to 0.1)                             | -0.2 (-1.1 to 0.8)                  |
| South Africa                                                                                                                         | 15.9 (12.2 to 20.2)        | 16.0 (12.3 to 19.9)        | 16.0 (12.3 to 20.0)        | 16.2 (12.2 to 20.4)        | 0.1 (-0.4 to 0.5)                              | 1.1 (-5.4 to 8.2)                   |
| Swaziland                                                                                                                            | 11.0 (7.7 to 15.1)         | 8.7 (6.4 to 11.1)          | 8.3 (6.4 to 11.0)          | 8.3 (6.2 to 10.7)          | -0.3 (-0.4 to -0.2)                            | -3.8 (-5.4 to -2.3)                 |
| Zimbabwe                                                                                                                             | 15.4 (11.3 to 20.5)        | 15.5 (11.4 to 20.5)        | 15.5 (11.4 to 20.5)        | 15.6 (11.4 to 20.8)        | 0.0 (-0.1 to 0.1)                              | 0.5 (-0.9 to 1.7)                   |
| <b>Western Sub-Saharan Africa</b>                                                                                                    |                            |                            |                            |                            |                                                |                                     |
| Benin                                                                                                                                | 15.5 (11.7 to 19.9)        | 15.4 (11.6 to 19.5)        | 15.4 (11.6 to 19.5)        | 15.3 (11.6 to 19.3)        | -0.0 (-0.1 to 0.1)                             | -0.7 (-2.0 to 0.9)                  |
| Burkina Faso                                                                                                                         | 15.5 (11.6 to 19.8)        | 15.5 (11.7 to 19.7)        | 15.4 (11.6 to 19.7)        | 15.4 (11.7 to 19.6)        | -0.0 (-0.1 to 0.0)                             | -0.4 (-1.2 to 0.4)                  |
| Cameroon                                                                                                                             | 15.4 (11.6 to 19.6)        | 15.4 (11.6 to 19.5)        | 15.4 (11.6 to 19.5)        | 15.4 (11.6 to 19.4)        | -0.0 (-0.1 to 0.0)                             | -0.4 (-1.1 to 0.4)                  |
| Cape Verde                                                                                                                           | 15.3 (11.6 to 19.3)        | 15.2 (11.5 to 19.1)        | 15.2 (11.5 to 19.2)        | 15.2 (11.5 to 19.1)        | -0.0 (-0.0 to 0.0)                             | -0.2 (-0.7 to 0.2)                  |
| Chad                                                                                                                                 | 15.4 (11.6 to 19.7)        | 15.4 (11.6 to 19.6)        | 15.4 (11.6 to 19.6)        | 15.4 (11.6 to 19.5)        | -0.0 (-0.1 to 0.0)                             | -0.2 (-0.8 to 0.5)                  |
| Cote d'Ivoire                                                                                                                        | 14.2 (10.9 to 18.0)        | 14.3 (10.9 to 18.2)        | 14.2 (10.6 to 18.2)        | 14.1 (10.4 to 18.5)        | -0.1 (-0.5 to 0.4)                             | -1.1 (-7.3 to 6.5)                  |
| The Gambia                                                                                                                           | 15.4 (11.6 to 19.5)        | 15.4 (11.6 to 19.6)        | 15.4 (11.6 to 19.6)        | 15.4 (11.6 to 19.6)        | 0.0 (-0.0 to 0.0)                              | 0.0 (-0.1 to 0.1)                   |
| Ghana                                                                                                                                | 15.4 (11.6 to 19.6)        | 15.4 (11.7 to 19.6)        | 15.4 (11.7 to 19.6)        | 15.4 (11.7 to 19.6)        | -0.0 (-0.0 to 0.0)                             | -0.1 (-0.2 to 0.1)                  |
| Guinea                                                                                                                               | 15.4 (11.6 to 19.7)        | 15.5 (11.6 to 19.8)        | 15.5 (11.7 to 19.8)        | 15.5 (11.7 to 19.9)        | 0.0 (-0.0 to 0.1)                              | 0.2 (-0.3 to 0.7)                   |
| Guinea-Bissau                                                                                                                        | 15.4 (11.6 to 19.5)        | 15.4 (11.7 to 19.6)        | 15.4 (11.7 to 19.6)        | 15.4 (11.7 to 19.6)        | -0.0 (-0.0 to 0.0)                             | -0.1 (-0.4 to 0.3)                  |
| Liberia                                                                                                                              | 15.4 (11.6 to 19.5)        | 15.4 (11.6 to 19.5)        | 15.3 (11.6 to 19.5)        | 15.3 (11.6 to 19.4)        | -0.0 (-0.1 to 0.0)                             | -0.3 (-0.9 to 0.2)                  |
| Mali                                                                                                                                 | 15.4 (11.6 to 19.7)        | 15.4 (11.6 to 19.7)        | 15.4 (11.6 to 19.6)        | 15.4 (11.6 to 19.6)        | -0.0 (-0.0 to 0.0)                             | -0.2 (-0.5 to 0.2)                  |
| Mauritania                                                                                                                           | 15.4 (11.6 to 19.6)        | 15.4 (11.6 to 19.6)        | 15.4 (11.6 to 19.6)        | 15.4 (11.6 to 19.5)        | -0.0 (-0.0 to 0.0)                             | -0.1 (-0.3 to 0.2)                  |
| Niger                                                                                                                                | 15.4 (11.6 to 19.7)        | 15.3 (11.5 to 19.5)        | 15.3 (11.5 to 19.5)        | 15.3 (11.6 to 19.4)        | -0.0 (-0.1 to 0.0)                             | -0.4 (-1.0 to 0.3)                  |
| Nigeria                                                                                                                              | 15.8 (13.2 to 18.8)        | 16.4 (13.0 to 19.9)        | 16.8 (12.9 to 21.1)        | 17.6 (12.4 to 23.7)        | 0.4 (-0.6 to 1.3)                              | 7.2 (-8.9 to 21.7)                  |
| Sao Tome and Principe                                                                                                                | 15.3 (11.6 to 19.4)        | 15.3 (11.6 to 19.3)        | 15.3 (11.6 to 19.3)        | 15.3 (11.6 to 19.3)        | -0.0 (-0.1 to 0.0)                             | -0.3 (-1.2 to 0.5)                  |
| Senegal                                                                                                                              | 15.4 (11.6 to 19.5)        | 15.4 (11.6 to 19.5)        | 15.3 (11.6 to 19.4)        | 15.3 (11.6 to 19.4)        | -0.0 (-0.1 to 0.0)                             | -0.3 (-0.9 to 0.4)                  |
| Sierra Leone                                                                                                                         | 15.5 (11.7 to 19.8)        | 15.4 (11.6 to 19.6)        | 15.4 (11.6 to 19.6)        | 15.3 (11.6 to 19.4)        | -0.0 (-0.1 to 0.0)                             | -0.5 (-1.5 to 0.6)                  |
| Togo                                                                                                                                 | 15.4 (11.6 to 19.6)        | 15.4 (11.7 to 19.7)        | 15.4 (11.7 to 19.6)        | 15.4 (11.7 to 19.5)        | -0.0 (-0.1 to 0.0)                             | -0.6 (-1.6 to 0.6)                  |
| <b>Indicator 17.19.2c: Percentage of well-certified deaths by a vital registration system among a country's total population (%)</b> |                            |                            |                            |                            |                                                |                                     |
| <b>Central Europe, Eastern Europe, and Central Asia</b>                                                                              |                            |                            |                            |                            |                                                |                                     |
| <b>Central Asia</b>                                                                                                                  |                            |                            |                            |                            |                                                |                                     |
| Armenia                                                                                                                              | 86.0 (83.4 to 88.5)        | 90.3 (88.0 to 92.4)        | 90.1 (87.4 to 92.4)        | 92.2 (87.4 to 95.3)        | 0.1 (-0.0 to 0.3)                              | 2.1 (-0.6 to 4.2)                   |
| Azerbaijan                                                                                                                           | 67.2 (62.7 to 71.5)        | 79.0 (73.0 to 84.3)        | 79.8 (74.2 to 84.8)        | 85.6 (77.9 to 91.4)        | 0.5 (0.2 to 0.8)                               | 8.4 (3.2 to 13.1)                   |
| Georgia                                                                                                                              | 74.5 (69.6 to 78.7)        | 58.3 (51.7 to 64.8)        | 61.3 (54.2 to 68.0)        | 57.0 (43.7 to 68.0)        | -0.2 (-1.3 to 0.7)                             | -2.4 (-18.3 to 11.2)                |
| Kazakhstan                                                                                                                           | 84.4 (81.4 to 87.0)        | 80.3 (76.4 to 83.8)        | 81.7 (77.4 to 85.5)        | 80.7 (72.4 to 87.7)        | 0.0 (-0.5 to 0.4)                              | 0.5 (-6.7 to 5.8)                   |
| Kyrgyzstan                                                                                                                           | 79.1 (75.5 to 82.2)        | 90.5 (87.9 to 92.8)        | 90.2 (87.2 to 92.7)        | 94.0 (90.5 to 96.6)        | 0.3 (0.1 to 0.4)                               | 3.9 (2.0 to 5.5)                    |
| Mongolia                                                                                                                             | 56.0 (48.2 to 63.9)        | 67.7 (60.3 to 73.9)        | 67.7 (60.3 to 73.9)        | 75.5 (65.5 to 82.8)        | 0.7 (0.2 to 1.3)                               | 11.6 (2.5 to 21.0)                  |
| Tajikistan                                                                                                                           | 49.2 (45.2 to 53.5)        | 57.8 (50.6 to 64.6)        | 56.1 (49.1 to 63.2)        | 56.6 (45.0 to 68.5)        | -0.2 (-1.0 to 0.6)                             | -2.2 (-14.5 to 9.2)                 |
| Turkmenistan                                                                                                                         | 76.1 (72.0 to 79.9)        | 76.0 (71.1 to 80.4)        | 76.7 (71.2 to 81.4)        | 75.6 (65.6 to 83.8)        | -0.0 (-0.6 to 0.4)                             | -0.5 (-8.8 to 6.5)                  |
| Uzbekistan                                                                                                                           | 67.8 (63.5 to 71.4)        | 78.8 (74.1 to 82.9)        | 79.4 (74.5 to 83.8)        | 83.8 (75.4 to 90.2)        | 0.4 (0.0 to 0.7)                               | 6.3 (0.5 to 10.8)                   |
| <b>Central Europe</b>                                                                                                                |                            |                            |                            |                            |                                                |                                     |
| Albania                                                                                                                              | 68.3 (64.3 to 72.0)        | 70.2 (63.6 to 76.2)        | 71.7 (64.6 to 78.0)        | 75.1 (63.2 to 84.7)        | 0.4 (-0.2 to 0.9)                              | 6.8 (-3.1 to 13.7)                  |
| Bosnia and Herzegovina                                                                                                               | 70.4 (63.3 to 76.9)        | 73.1 (67.9 to 78.0)        | 74.1 (67.5 to 79.3)        | 77.8 (67.4 to 86.2)        | 0.4 (-0.2 to 0.8)                              | 6.3 (-2.6 to 13.2)                  |
| Bulgaria                                                                                                                             | 71.9 (68.5 to 75.3)        | 72.1 (67.3 to 76.5)        | 73.9 (68.3 to 78.9)        | 74.5 (64.6 to 83.2)        | 0.2 (-0.4 to 0.7)                              | 3.4 (-5.4 to 10.6)                  |
| Croatia                                                                                                                              | 83.2 (80.4 to 85.6)        | 90.2 (88.0 to 92.2)        | 90.0 (87.6 to 92.2)        | 92.9 (89.0 to 95.6)        | 0.2 (0.0 to 0.3)                               | 2.9 (0.4 to 4.7)                    |
| Czech Republic                                                                                                                       | 83.7 (81.2 to 86.1)        | 85.2 (82.1 to 87.9)        | 85.0 (81.5 to 88.0)        | 84.9 (78.2 to 90.3)        | -0.0 (-0.4 to 0.2)                             | -0.4 (-5.5 to 3.7)                  |
| Hungary                                                                                                                              | 90.5 (88.5 to 92.0)        | 91.3 (89.2 to 92.0)        | 90.9 (88.5 to 92.8)        | 90.9 (86.3 to 94.1)        | -0.0 (-0.2 to 0.1)                             | -0.4 (-3.6 to 2.0)                  |
| Macedonia                                                                                                                            | 81.2 (78.2 to 84.0)        | 79.8 (75.5 to 83.6)        | 80.4 (75.8 to 83.6)        | 80.8 (71.8 to 88.1)        | 0.1 (-0.4 to 0.4)                              | 1.2 (-6.0 to 6.6)                   |
| Montenegro                                                                                                                           | 70.0 (65.2 to 74.3)        | 78.2 (72.7 to 83.1)        | 79.5 (74.2 to 84.5)        | 84.1 (75.0 to 90.8)        | 0.5 (0.1 to 0.7)                               | 7.5 (1.5 to 11.9)                   |
| Poland                                                                                                                               | 72.0 (68.3 to 75.1)        | 72.2 (68.0 to 76.4)        | 74.0 (69.1 to 78.6)        | 77.5 (68.3 to 84.6)        | 0.5 (-0.0 to 0.8)                              | 7.3 (-0.7 to 13.2)                  |
| Romania                                                                                                                              | 84.2 (81.6 to 86.6)        | 83.9 (81.2 to 86.5)        | 84.0 (80.9 to 87.1)        | 84.3 (78.3 to 89.6)        | 0.0 (-0.3 to 0.3)                              | 0.4 (-4.7 to 4.6)                   |
| Serbia                                                                                                                               | 68.1 (64.0 to 71.8)        | 67.7 (62.9 to 72.2)        | 69.0 (63.6 to 74.2)        | 68.1 (57.7 to 77.3)        | 0.0 (-0.8 to 0.6)                              | 0.5 (-10.7 to 9.3)                  |
| Slovakia                                                                                                                             | 82.7 (79.9 to 85.3)        | 89.2 (86.2 to 92.0)        | 89.3 (86.0 to 92.2)        | 92.4 (87.9 to 95.7)        | 0.2 (0.1 to 0.4)                               | 3.6 (0.8 to 5.5)                    |
| Slovenia                                                                                                                             | 88.7 (86.6 to 90.5)        | 86.8 (83.9 to 89.3)        | 87.0 (83.7 to 90.0)        | 85.8 (78.8 to 91.3)        | -0.1 (-0.5 to 0.2)                             | -1.2 (-6.8 to 2.9)                  |
| <b>Eastern Europe</b>                                                                                                                |                            |                            |                            |                            |                                                |                                     |

|                                    | Estimate in 2000 (95% UIs) | Estimate in 2015 (95% UIs) | Estimate in 2017 (95% UIs) | Estimate in 2030 (95% UIs) | Annualised rate of change, 2015-2030 (95% UIs) | Percent change, 2015-2030 (95% UIs) |
|------------------------------------|----------------------------|----------------------------|----------------------------|----------------------------|------------------------------------------------|-------------------------------------|
| Belarus                            | 82.9 (80.1 to 85.3)        | 84.2 (80.7 to 87.0)        | 84.9 (80.8 to 88.1)        | 86.8 (79.8 to 91.8)        | 0.2 (-0.1 to 0.4)                              | 3.1 (-1.9 to 6.6)                   |
| Estonia                            | 91.9 (90.2 to 93.6)        | 92.1 (90.2 to 93.8)        | 92.1 (90.0 to 92.9)        | 92.5 (88.4 to 95.4)        | 0.0 (-0.2 to 0.2)                              | 0.5 (-2.5 to 2.5)                   |
| Latvia                             | 89.5 (87.3 to 91.4)        | 92.0 (89.7 to 93.8)        | 92.2 (89.7 to 94.1)        | 94.1 (90.5 to 96.6)        | 0.1 (0.0 to 0.2)                               | 2.3 (0.1 to 3.8)                    |
| Lithuania                          | 92.0 (90.3 to 93.6)        | 93.3 (91.5 to 94.8)        | 93.1 (91.1 to 94.7)        | 93.7 (90.1 to 96.2)        | 0.0 (-0.1 to 0.1)                              | 0.5 (-2.0 to 2.1)                   |
| Moldova                            | 80.3 (77.1 to 83.1)        | 82.8 (79.5 to 85.7)        | 83.0 (79.3 to 86.4)        | 84.4 (77.6 to 89.8)        | 0.1 (-0.2 to 0.4)                              | 1.9 (-3.5 to 5.9)                   |
| Russia                             | 87.6 (84.4 to 90.3)        | 86.1 (82.4 to 89.4)        | 85.8 (81.9 to 89.4)        | 83.8 (75.9 to 90.4)        | -0.2 (-0.6 to 0.1)                             | -2.7 (-9.3 to 2.2)                  |
| Ukraine                            | 85.4 (82.7 to 87.7)        | 85.0 (81.9 to 87.6)        | 84.2 (80.6 to 87.2)        | 83.1 (76.8 to 88.4)        | -0.1 (-0.5 to 0.1)                             | -2.2 (-6.8 to 1.9)                  |
| <b>High-income</b>                 |                            |                            |                            |                            |                                                |                                     |
| <b>Australasia</b>                 |                            |                            |                            |                            |                                                |                                     |
| Australia                          | 90.9 (89.0 to 92.5)        | 89.9 (87.6 to 91.9)        | 90.1 (87.4 to 92.2)        | 89.3 (83.6 to 93.2)        | -0.0 (-0.4 to 0.1)                             | -0.7 (-5.2 to 2.1)                  |
| New Zealand                        | 95.4 (93.9 to 96.5)        | 94.9 (93.4 to 96.2)        | 95.0 (93.2 to 96.3)        | 94.9 (91.2 to 97.0)        | -0.0 (-0.2 to 0.1)                             | -0.1 (-2.5 to 1.4)                  |
| <b>High-income Asia Pacific</b>    |                            |                            |                            |                            |                                                |                                     |
| Bhunei                             | 68.1 (64.4 to 71.8)        | 73.8 (69.5 to 77.8)        | 75.2 (70.1 to 79.9)        | 79.3 (70.5 to 86.6)        | 0.5 (0.0 to 0.8)                               | 7.3 (0.1 to 12.7)                   |
| Japan                              | 85.6 (83.0 to 88.0)        | 76.6 (72.6 to 80.3)        | 77.3 (72.7 to 81.5)        | 71.8 (62.1 to 80.4)        | -0.5 (-1.1 to 0.1)                             | -6.4 (-15.5 to 1.0)                 |
| South Korea                        | 79.2 (76.2 to 81.7)        | 82.5 (79.1 to 85.5)        | 83.2 (79.2 to 86.6)        | 86.6 (80.3 to 91.6)        | 0.3 (0.0 to 0.6)                               | 5.0 (0.3 to 8.6)                    |
| Singapore                          | 93.8 (92.3 to 95.1)        | 94.6 (92.9 to 95.9)        | 94.8 (93.0 to 96.1)        | 95.5 (92.5 to 97.4)        | 0.1 (-0.1 to 0.1)                              | 0.9 (-0.9 to 2.2)                   |
| <b>High-income North America</b>   |                            |                            |                            |                            |                                                |                                     |
| Canada                             | 88.8 (86.8 to 90.5)        | 88.9 (86.2 to 91.4)        | 89.0 (85.9 to 91.7)        | 89.1 (83.2 to 93.6)        | 0.0 (-0.3 to 0.2)                              | 0.2 (-4.2 to 3.3)                   |
| Greenland                          | 88.0 (85.5 to 90.1)        | 74.3 (69.8 to 78.3)        | 74.5 (69.1 to 79.2)        | 64.7 (55.5 to 73.5)        | -0.9 (-1.7 to -0.3)                            | -13.0 (-22.1 to -4.7)               |
| United States                      | 87.6 (85.2 to 89.7)        | 86.5 (83.5 to 89.0)        | 86.7 (83.2 to 89.6)        | 85.9 (79.2 to 91.3)        | -0.0 (-0.4 to 0.2)                             | -0.6 (-6.0 to 3.3)                  |
| <b>Southern Latin America</b>      |                            |                            |                            |                            |                                                |                                     |
| Argentina                          | 66.9 (63.3 to 70.1)        | 68.8 (64.4 to 73.0)        | 70.1 (64.5 to 75.0)        | 72.4 (62.4 to 80.5)        | 0.3 (-0.3 to 0.8)                              | 5.2 (-5.0 to 12.5)                  |
| Chile                              | 86.8 (84.5 to 88.8)        | 88.5 (85.8 to 90.8)        | 88.5 (85.3 to 91.1)        | 89.8 (84.2 to 93.8)        | 0.1 (-0.2 to 0.3)                              | 1.5 (-2.5 to 4.2)                   |
| Uruguay                            | 78.2 (75.5 to 80.6)        | 76.8 (73.0 to 80.4)        | 77.8 (73.4 to 81.8)        | 78.5 (70.4 to 85.5)        | 0.1 (-0.3 to 0.5)                              | 2.2 (-4.6 to 7.8)                   |
| <b>Western Europe</b>              |                            |                            |                            |                            |                                                |                                     |
| Andorra                            | 0.0 (0.0 to 0.0)           | 0.0 (0.0 to 0.0)           | 0.0 (0.0 to 0.0)           | 0.0 (0.0 to 0.0)           | 0.0 (0.0 to 0.0)                               | 0.0 (0.0 to 0.0)                    |
| Austria                            | 88.2 (86.1 to 90.1)        | 87.7 (85.2 to 90.0)        | 87.5 (84.4 to 90.1)        | 86.5 (80.4 to 91.3)        | -0.1 (-0.4 to 0.1)                             | -1.4 (-6.4 to 2.2)                  |
| Belgium                            | 82.7 (80.1 to 85.0)        | 80.9 (77.5 to 83.9)        | 81.6 (77.6 to 85.0)        | 81.6 (73.8 to 87.5)        | 0.0 (-0.4 to 0.4)                              | 0.6 (-5.9 to 5.6)                   |
| Cyprus                             | 62.8 (55.8 to 69.6)        | 66.1 (60.1 to 72.2)        | 66.7 (60.1 to 73.5)        | 66.4 (54.0 to 77.9)        | 0.0 (-0.9 to 0.7)                              | 0.3 (-12.4 to 10.8)                 |
| Denmark                            | 84.4 (81.8 to 86.8)        | 84.4 (81.3 to 87.1)        | 85.0 (81.5 to 88.0)        | 86.1 (79.5 to 91.0)        | 0.1 (-0.2 to 0.4)                              | 2.0 (-2.9 to 5.5)                   |
| Finland                            | 93.8 (92.3 to 95.1)        | 93.3 (91.4 to 94.8)        | 93.0 (90.8 to 94.7)        | 92.8 (88.5 to 95.6)        | -0.0 (-0.2 to 0.1)                             | -0.6 (-3.6 to 1.3)                  |
| France                             | 78.8 (76.0 to 81.3)        | 79.3 (75.5 to 82.5)        | 79.0 (75.8 to 84.1)        | 81.3 (73.2 to 87.8)        | 0.2 (-0.3 to 0.5)                              | 2.5 (-4.4 to 7.4)                   |
| Germany                            | 83.1 (80.4 to 85.5)        | 83.7 (80.4 to 86.5)        | 84.0 (80.3 to 87.3)        | 84.5 (77.5 to 89.9)        | 0.1 (-0.3 to 0.3)                              | 0.9 (-4.7 to 4.9)                   |
| Greece                             | 71.9 (68.6 to 74.8)        | 75.5 (71.4 to 79.2)        | 76.0 (71.2 to 80.3)        | 78.2 (69.9 to 85.3)        | 0.2 (-0.3 to 0.6)                              | 3.5 (-3.7 to 9.2)                   |
| Iceland                            | 91.6 (89.7 to 93.3)        | 89.0 (86.5 to 90.9)        | 89.0 (86.4 to 91.2)        | 87.0 (81.3 to 91.2)        | -0.2 (-0.5 to 0.1)                             | -2.3 (-6.9 to 1.2)                  |
| Ireland                            | 89.4 (87.3 to 91.3)        | 89.9 (87.2 to 92.2)        | 89.8 (86.8 to 92.3)        | 89.7 (84.3 to 94.0)        | -0.0 (-0.3 to 0.2)                             | -0.3 (-4.4 to 2.6)                  |
| Israel                             | 81.3 (78.8 to 83.7)        | 78.5 (75.0 to 81.9)        | 79.1 (74.7 to 83.1)        | 77.6 (68.7 to 85.0)        | -0.1 (-0.6 to 0.3)                             | -1.3 (-9.1 to 5.0)                  |
| Italy                              | 87.1 (84.9 to 89.1)        | 86.3 (83.0 to 88.9)        | 86.1 (82.6 to 89.2)        | 84.8 (77.5 to 90.4)        | -0.1 (-0.5 to 0.2)                             | -1.8 (-7.5 to 2.6)                  |
| Luxembourg                         | 80.5 (77.4 to 83.2)        | 82.3 (79.0 to 85.4)        | 83.3 (79.6 to 86.8)        | 85.2 (78.5 to 90.6)        | 0.2 (-0.1 to 0.5)                              | 3.5 (-2.0 to 7.4)                   |
| Malta                              | 88.3 (86.1 to 90.4)        | 85.2 (82.0 to 87.8)        | 85.2 (81.5 to 88.2)        | 82.6 (74.7 to 88.6)        | -0.2 (-0.7 to 0.1)                             | -3.1 (-9.6 to 1.9)                  |
| Netherlands                        | 83.0 (80.5 to 85.3)        | 83.6 (80.7 to 86.2)        | 83.6 (80.4 to 87.0)        | 83.9 (76.9 to 89.6)        | 0.0 (-0.4 to 0.3)                              | 0.5 (-5.1 to 4.8)                   |
| Norway                             | 86.4 (84.0 to 88.5)        | 84.0 (80.6 to 86.8)        | 84.0 (80.7 to 87.7)        | 83.3 (75.8 to 89.3)        | -0.1 (-0.5 to 0.2)                             | -0.7 (-6.9 to 3.8)                  |
| Portugal                           | 75.8 (72.9 to 78.5)        | 79.0 (75.0 to 82.6)        | 79.3 (74.6 to 83.6)        | 81.4 (73.3 to 88.1)        | 0.2 (-0.2 to 0.5)                              | 3.1 (-3.7 to 7.7)                   |
| Spain                              | 82.8 (80.3 to 85.2)        | 84.2 (81.3 to 87.0)        | 84.2 (80.5 to 87.4)        | 85.2 (78.6 to 90.6)        | 0.1 (-0.3 to 0.3)                              | 1.1 (-4.1 to 4.9)                   |
| Sweden                             | 85.9 (83.6 to 88.0)        | 84.4 (81.4 to 87.1)        | 84.7 (81.1 to 88.0)        | 83.8 (76.1 to 89.5)        | -0.1 (-0.5 to 0.2)                             | -0.8 (-7.1 to 3.6)                  |
| Switzerland                        | 83.7 (80.6 to 86.5)        | 85.4 (82.0 to 88.5)        | 85.6 (81.8 to 88.8)        | 87.4 (80.9 to 92.2)        | 0.1 (-0.2 to 0.4)                              | 2.3 (-2.5 to 5.6)                   |
| United Kingdom                     | 90.2 (87.9 to 92.1)        | 90.6 (88.1 to 92.7)        | 90.5 (87.8 to 92.9)        | 90.5 (85.3 to 94.3)        | -0.0 (-0.3 to 0.2)                             | -0.1 (-4.1 to 2.7)                  |
| <b>Latin America and Caribbean</b> |                            |                            |                            |                            |                                                |                                     |
| <b>Andean Latin America</b>        |                            |                            |                            |                            |                                                |                                     |
| Bolivia                            | 18.3 (13.9 to 23.1)        | 61.9 (53.5 to 69.8)        | 63.8 (56.2 to 71.8)        | 81.3 (72.5 to 88.3)        | 1.8 (1.3 to 2.4)                               | 31.4 (21.2 to 44.1)                 |
| Ecuador                            | 63.2 (59.8 to 66.8)        | 67.9 (63.2 to 72.3)        | 69.0 (63.2 to 74.2)        | 71.9 (61.4 to 80.6)        | 0.4 (-0.3 to 0.9)                              | 5.7 (-4.4 to 14.2)                  |
| Peru                               | 51.7 (46.8 to 57.0)        | 65.4 (59.5 to 71.3)        | 66.5 (60.0 to 73.0)        | 77.1 (67.6 to 85.3)        | 1.1 (0.6 to 1.5)                               | 17.8 (9.3 to 24.5)                  |
| <b>Caribbean</b>                   |                            |                            |                            |                            |                                                |                                     |
| Antigua and Barbuda                | 76.0 (72.4 to 79.3)        | 72.9 (67.9 to 77.5)        | 74.6 (69.2 to 79.1)        | 74.7 (65.4 to 82.5)        | 0.2 (-0.4 to 0.6)                              | 2.4 (-5.8 to 9.7)                   |
| The Bahamas                        | 84.2 (81.6 to 86.7)        | 86.0 (82.4 to 88.9)        | 86.1 (82.3 to 89.3)        | 87.8 (81.6 to 92.7)        | 0.1 (-0.1 to 0.4)                              | 2.2 (-2.1 to 5.4)                   |
| Barbados                           | 72.7 (68.0 to 77.0)        | 81.7 (77.4 to 85.6)        | 82.3 (77.8 to 86.6)        | 86.5 (79.5 to 92.0)        | 0.4 (0.1 to 0.6)                               | 5.9 (0.8 to 9.3)                    |
| Belize                             | 71.3 (67.1 to 75.3)        | 84.9 (81.0 to 88.1)        | 84.8 (80.6 to 88.3)        | 91.5 (86.6 to 95.1)        | 0.5 (0.3 to 0.7)                               | 7.7 (5.1 to 10.6)                   |
| Bermuda                            | 87.6 (84.8 to 90.1)        | 86.2 (82.8 to 89.1)        | 86.7 (83.0 to 89.7)        | 86.9 (80.0 to 92.0)        | 0.0 (-0.3 to 0.3)                              | 0.7 (-4.3 to 4.4)                   |
| Cuba                               | 87.1 (84.8 to 89.2)        | 90.3 (87.7 to 92.3)        | 90.3 (87.4 to 92.6)        | 92.2 (87.6 to 96.6)        | 0.1 (-0.1 to 0.3)                              | 2.1 (-1.1 to 4.2)                   |
| Dominica                           | 62.5 (57.9 to 66.9)        | 78.3 (74.1 to 82.5)        | 78.7 (73.8 to 83.2)        | 85.1 (77.9 to 90.9)        | 0.6 (0.2 to 0.8)                               | 8.7 (3.5 to 12.8)                   |
| Dominican Republic                 | 51.0 (47.0 to 55.2)        | 63.3 (57.5 to 69.0)        | 65.6 (59.0 to 72.0)        | 75.9 (65.8 to 84.6)        | 1.2 (0.7 to 1.6)                               | 20.0 (11.4 to 27.1)                 |
| Grenada                            | 69.5 (64.5 to 73.9)        | 82.2 (78.3 to 85.6)        | 83.1 (78.8 to 86.6)        | 89.7 (84.3 to 93.6)        | 0.6 (0.4 to 0.8)                               | 9.2 (5.9 to 12.3)                   |
| Guyana                             | 75.3 (71.2 to 78.8)        | 76.0 (70.8 to 80.7)        | 76.5 (70.8 to 81.6)        | 78.4 (68.4 to 86.7)        | 0.2 (-0.4 to 0.6)                              | 3.2 (-5.3 to 9.3)                   |
| Haiti                              | 30.7 (23.9 to 38.2)        | 55.0 (46.6 to 63.6)        | 56.3 (47.7 to 64.9)        | 68.3 (55.6 to 79.7)        | 1.4 (0.6 to 2.1)                               | 24.3 (10.2 to 37.3)                 |
| Jamaica                            | 74.4 (69.5 to 78.6)        | 83.7 (79.5 to 87.7)        | 83.7 (79.2 to 88.0)        | 88.0 (81.3 to 93.4)        | 0.3 (0.1 to 0.5)                               | 5.1 (0.8 to 8.4)                    |
| Puerto Rico                        | 83.4 (79.6 to 86.9)        | 85.8 (81.9 to 89.2)        | 86.2 (82.3 to 89.5)        | 88.1 (81.6 to 93.0)        | 0.2 (-0.1 to 0.4)                              | 2.6 (-2.1 to 6.0)                   |
| Saint Lucia                        | 72.7 (69.0 to 75.8)        | 81.9 (77.7 to 85.5)        | 82.3 (78.0 to 86.4)        | 87.3 (81.0 to 92.4)        | 0.4 (0.1 to 0.6)                               | 6.6 (2.3 to 9.8)                    |
| Saint Vincent and the Grenadines   | 80.5 (77.0 to 83.5)        | 81.3 (77.3 to 84.7)        | 81.7 (77.2 to 85.5)        | 84.4 (77.2 to 89.5)        | 0.2 (-0.1 to 0.5)                              | 3.8 (-1.6 to 7.9)                   |
| Suriname                           | 65.1 (60.8 to 69.9)        | 71.6 (66.0 to 76.7)        | 72.7 (66.7 to 78.3)        | 78.3 (68.5 to 86.3)        | 0.6 (0.1 to 0.9)                               | 9.3 (1.2 to 15.1)                   |
| Trinidad and Tobago                | 88.1 (86.0 to 90.1)        | 86.0 (81.9 to 89.4)        | 85.8 (81.1 to 89.5)        | 84.6 (76.1 to 91.1)        | -0.1 (-0.5 to 0.2)                             | -1.7 (-7.8 to 2.7)                  |
| Virgin Islands, U.S.               | 82.6 (78.7 to 86.0)        | 72.5 (66.8 to 77.8)        | 73.9 (67.7 to 79.5)        | 67.7 (55.6 to 78.0)        | -0.5 (-1.3 to 0.1)                             | -6.8 (-18.3 to 2.2)                 |
| <b>Central Latin America</b>       |                            |                            |                            |                            |                                                |                                     |
| Colombia                           | 85.3 (82.7 to 87.3)        | 87.8 (85.1 to 90.3)        | 88.1 (85.2 to 90.8)        | 90.8 (86.2 to 94.4)        | 0.2 (0.0 to 0.4)                               | 3.5 (0.4 to 5.7)                    |
| Costa Rica                         | 89.4 (87.4 to 91.2)        | 89.7 (86.9 to 92.0)        | 89.8 (86.6 to 92.3)        | 91.3 (85.4 to 94.9)        | 0.1 (-0.1 to 0.3)                              | 1.8 (-1.9 to 4.1)                   |
| El Salvador                        | 67.6 (64.1 to 70.8)        | 68.6 (63.8 to 73.2)        | 70.4 (64.5 to 75.8)        | 73.9 (63.7 to 82.3)        | 0.5 (-0.1 to 0.9)                              | 7.5 (-1.3 to 14.2)                  |
| Guatemala                          | 72.2 (68.9 to 75.4)        | 77.4 (73.2 to 81.0)        | 77.8 (73.0 to 81.8)        | 81.8 (73.8 to 87.9)        | 0.4 (-0.0 to 0.7)                              | 5.7 (-0.4 to 10.3)                  |
| Honduras                           | 58.5 (50.4 to 66.4)        | 34.2 (28.5 to 40.3)        | 38.3 (31.5 to 45.5)        | 41.9 (31.0 to 53.7)        | 1.3 (-0.0 to 2.3)                              | 22.1 (-0.2 to 40.6)                 |
| Mexico                             | 80.5 (77.6 to 83.2)        | 86.5 (83.9 to 89.3)        | 86.8 (83.7 to 89.8)        | 90.3 (85.6 to 94.1)        | 0.3 (0.1 to 0.4)                               | 4.4 (1.1 to 6.8)                    |
| Nicaragua                          | 69.6 (65.8 to 73.1)        | 87.8 (84.5 to 90.4)        | 87.9 (84.6 to 90.7)        | 94.2 (90.9 to 96.6)        | 0.5 (0.4 to 0.6)                               | 7.4 (5.5 to 9.1)                    |
| Panama                             | 82.4 (79.5 to 85.2)        | 84.3 (80.8 to 87.2)        | 85.2 (81.4 to 88.4)        | 87.8 (81.6 to 92.6)        | 0.3 (-0.0 to 0.5)                              | 4.1 (-0.2 to 7.3)                   |





**Supplementary table 4. GATHER checklist of information that should be included in reports of global health estimates, with description of compliance and location of information for GBD 2017 SDG Capstone**

| #                                                                                                     | GATHER checklist item                                                                                                                                                                                                                                                                                                                                                                   | Description of compliance                                                                                                                                                                                       | Reference                                                                                         |
|-------------------------------------------------------------------------------------------------------|-----------------------------------------------------------------------------------------------------------------------------------------------------------------------------------------------------------------------------------------------------------------------------------------------------------------------------------------------------------------------------------------|-----------------------------------------------------------------------------------------------------------------------------------------------------------------------------------------------------------------|---------------------------------------------------------------------------------------------------|
| <b>Objectives and funding</b>                                                                         |                                                                                                                                                                                                                                                                                                                                                                                         |                                                                                                                                                                                                                 |                                                                                                   |
| 1                                                                                                     | Define the indicators, populations, and time periods for which estimates were made.                                                                                                                                                                                                                                                                                                     | Narrative provided in paper and appendix describing indicators, definitions, and populations.                                                                                                                   | Summary; Main text; Appendix Part 1. Sections 1-3; Supplementary Results                          |
| 2                                                                                                     | List the funding sources for the work.                                                                                                                                                                                                                                                                                                                                                  | Funding sources listed in paper.                                                                                                                                                                                | Main text                                                                                         |
| <b>Data Inputs</b>                                                                                    |                                                                                                                                                                                                                                                                                                                                                                                         |                                                                                                                                                                                                                 |                                                                                                   |
| <i>For all data inputs from multiple sources that are synthesized as part of the study:</i>           |                                                                                                                                                                                                                                                                                                                                                                                         |                                                                                                                                                                                                                 |                                                                                                   |
| 3                                                                                                     | Describe how the data were identified and how the data were accessed.                                                                                                                                                                                                                                                                                                                   | Narrative description of data seeking methodology provided.                                                                                                                                                     | Appendix Part 1. Sections 1-3                                                                     |
| 4                                                                                                     | Specify the inclusion and exclusion criteria. Identify all ad-hoc exclusions.                                                                                                                                                                                                                                                                                                           | Narrative about inclusion and exclusion criteria by data type provided.                                                                                                                                         | Appendix Part 1. Sections 1-3                                                                     |
| 5                                                                                                     | Provide information on all included data sources and their main characteristics. For each data source used, report reference information or contact name/institution, population represented, data collection method, year(s) of data collection, sex and age range, diagnostic criteria or measurement method, and sample size, as relevant.                                           | List of all data sources provided in submission materials; interactive, online data source tool that provides metadata for data sources by component, geography, cause, risk, or impairment has been developed. | Appendix Part 1. Sections 1-3<br><br>Online data citation tool [link to be added upon acceptance] |
| 6                                                                                                     | Identify and describe any categories of input data that have potentially important biases (e.g., based on characteristics listed in item 5).                                                                                                                                                                                                                                            | Summary of known biases by cause included in methodological appendix.                                                                                                                                           | Appendix Part 1. Section 3                                                                        |
| <i>For data inputs that contribute to the analysis but were not synthesized as part of the study:</i> |                                                                                                                                                                                                                                                                                                                                                                                         |                                                                                                                                                                                                                 |                                                                                                   |
| 7                                                                                                     | Describe and give sources for any other data inputs.                                                                                                                                                                                                                                                                                                                                    | Included in list of all data sources provided in submission materials, as well as online data source tool.                                                                                                      | Appendix Part 1. Sections 1-3<br><br>Online data citation tool [link to be added upon acceptance] |
| <i>For all data inputs:</i>                                                                           |                                                                                                                                                                                                                                                                                                                                                                                         |                                                                                                                                                                                                                 |                                                                                                   |
| 8                                                                                                     | Provide all data inputs in a file format from which data can be efficiently extracted (e.g., a spreadsheet as opposed to a PDF), including all relevant meta-data listed in item 5. For any data inputs that cannot be shared due to ethical or legal reasons, such as third-party ownership, provide a contact name or the name of the institution that retains the right to the data. | Downloads of input data will be available through online tools, including data visualization tools and data query tools. Input data not available in tools will be made available upon request.                 | Online data citation and visualization tools [links to be added upon acceptance]                  |
| <b>Data analysis</b>                                                                                  |                                                                                                                                                                                                                                                                                                                                                                                         |                                                                                                                                                                                                                 |                                                                                                   |
| 9                                                                                                     | Provide a conceptual overview of the data analysis method. A diagram may be helpful.                                                                                                                                                                                                                                                                                                    | Flow diagrams of the overall methodological processes, as well as                                                                                                                                               | Main text; Appendix Part 1. Section 3                                                             |

|                               |                                                                                                                                                                                                                                                                         |                                                                                                                                                   |                                                                                                       |
|-------------------------------|-------------------------------------------------------------------------------------------------------------------------------------------------------------------------------------------------------------------------------------------------------------------------|---------------------------------------------------------------------------------------------------------------------------------------------------|-------------------------------------------------------------------------------------------------------|
|                               |                                                                                                                                                                                                                                                                         | cause-specific modelling processes have been provided.                                                                                            |                                                                                                       |
| 10                            | Provide a detailed description of all steps of the analysis, including mathematical formulae. This description should cover, as relevant, data cleaning, data pre-processing, data adjustments and weighting of data sources, and mathematical or statistical model(s). | Flow diagrams and corresponding methodological write-ups for each cause and modelling processes have been provided.                               | Appendix Part 1. Section 3, Part 2, Part 3. Sections 1-5                                              |
| 11                            | Describe how candidate models were evaluated and how the final model(s) were selected.                                                                                                                                                                                  | Provided in the methodological write-ups.                                                                                                         | Appendix Part 1. Section 3, Part 2, Part 3. Sections 1-5                                              |
| 12                            | Provide the results of an evaluation of model performance, if done, as well as the results of any relevant sensitivity analysis.                                                                                                                                        | Provided in the methodological write-ups.                                                                                                         | Appendix Part 1. Section 3, Part 2, Part 3. Sections 1-5                                              |
| 13                            | Describe methods for calculating uncertainty of the estimates. State which sources of uncertainty were, and were not, accounted for in the uncertainty analysis.                                                                                                        | Provided in the methodological write-ups.                                                                                                         | Appendix Part 1. Section 3                                                                            |
| 14                            | State how analytic or statistical source code used to generate estimates can be accessed.                                                                                                                                                                               | Access statement provided.                                                                                                                        | Code is provided in an online repository [link to be added upon acceptance]                           |
| <b>Results and Discussion</b> |                                                                                                                                                                                                                                                                         |                                                                                                                                                   |                                                                                                       |
| 15                            | Provide published estimates in a file format from which data can be efficiently extracted.                                                                                                                                                                              | GBD 2016 results will be made available through online data visualization tools, the Global Health Data Exchange, and the online data query tool. | Supplementary Results<br>Online data visualization tool [link to be added upon acceptance]            |
| 16                            | Report a quantitative measure of the uncertainty of the estimates (e.g. uncertainty intervals).                                                                                                                                                                         | Uncertainty intervals are provided with all results.                                                                                              | Main text; Supplementary Results<br>Online data visualization tool [link to be added upon acceptance] |
| 17                            | Interpret results in light of existing evidence. If updating a previous set of estimates, describe the reasons for changes in estimates.                                                                                                                                | Discussion of methodological changes between SDG rounds provided in the narrative of the paper and appendix.                                      | Main text                                                                                             |
| 18                            | Discuss limitations of the estimates. Include a discussion of any modelling assumptions or data limitations that affect interpretation of the estimates.                                                                                                                | Discussion of limitations provided in the narrative of the main paper as well as in the methodological write-ups in the appendix.                 | Main text; Appendix Part 1. Section 3                                                                 |
